# Supplementary material for: ELOF1 is a transcription-coupled DNA repair factor that directs RNA polymerase II ubiquitylation
Source: Springer Nature journal article supplement (doi:10.1038/s41556-021-00688-9), 2021-06-01
Supplement: MOESM5 [file 41556_2021_688_MOESM5_ESM.xlsx]

## Sheet: Figure 1a
GENE	sumZ	numObs	normZ	pval_synth	rank_synth	fdr_synth	pval_supp	rank_supp	fdr_supp	Log2_FoldChange	-Log10(p)
UVSSA	-108.74	12	-17.33	1.5e-67	1	2.71e-63	1	18054	1	-5.323	66.82
STK19	-103.64	12	-16.51	1.57e-61	2	1.42e-57	1	18053	1	-4.359	60.8
ERCC8	-85.46	12	-13.6	1.89e-42	3	1.14e-38	1	18052	1	-5.694	41.72
MAD2L2	-71.84	12	-11.43	1.52e-30	4	6.84e-27	1	18051	1	-4.184	29.82
GTF2H5	-69.04	12	-10.98	2.38e-28	5	8.6e-25	1	18050	1	-3.347	27.62
RFWD3	-68.74	12	-10.93	4.09e-28	6	1.23e-24	1	18049	1	-2.919	27.39
RAD9A	-65.07	12	-10.35	2.18e-25	7	5.62e-22	1	18048	1	-4.115	24.66
ERCC6	-64.05	12	-10.18	1.2e-24	8	2.7e-21	1	18047	1	-2.647	23.92
XRCC1	-63.8	12	-10.14	1.78e-24	9	3.57e-21	1	18046	1	-2.034	23.75
ELOF1	-61.55	12	-9.78	6.72e-23	10	1.21e-19	1	18045	1	-4.488	22.17
ERCC1	-59.68	12	-9.48	1.23e-21	11	2.02e-18	1	18044	1	-2.216	20.91
RIC8A	-59.16	12	-9.4	2.72e-21	12	4.1e-18	1	18043	1	-2.683	20.57
APEX2	-57.66	12	-9.16	2.56e-20	13	3.55e-17	1	18042	1	-3.039	19.59
HUS1	-56.9	12	-9.04	7.83e-20	14	9.98e-17	1	18041	1	-2.907	19.11
POLK	-56.86	12	-9.03	8.29e-20	15	9.98e-17	1	18040	1	-3.75	19.08
ATP8B1	-56.69	12	-9.01	1.07e-19	16	1.2e-16	1	18039	1	-2.526	18.97
USP7	-54.6	12	-8.67	2.11e-18	17	2.24e-15	1	18038	1	-3.8	17.68
KEAP1	-53.51	12	-8.5	9.64e-18	18	9.67e-15	1	18037	1	-1.653	17.02
DSCC1	-51.83	12	-8.23	9.42e-17	19	8.95e-14	1	18036	1	-2.44	16.03
C16orf80	-50.96	12	-8.09	2.98e-16	20	2.69e-13	1	18035	1	-2.686	15.53
PIH1D1	-50.56	12	-8.03	5.05e-16	21	4.34e-13	1	18034	1	-1.815	15.3
HMCES	-50.1	12	-7.95	9.14e-16	22	7.5e-13	1	18033	1	-2.085	15.04
ERCC5	-49.52	12	-7.86	1.92e-15	23	1.51e-12	1	18032	1	-1.448	14.72
PDS5B	-48.99	12	-7.78	3.74e-15	24	2.81e-12	1	18031	1	-1.943	14.43
UBE2G1	-48.08	12	-7.63	1.17e-14	25	8.47e-12	1	18030	1	-2.015	13.93
EXO1	-47.51	12	-7.54	2.37e-14	26	1.65e-11	1	18029	1	-1.918	13.63
XPA	-46.17	12	-7.32	1.2e-13	27	8e-11	1	18028	1	-2.081	12.92
STAG2	-45.8	12	-7.26	1.87e-13	28	1.2e-10	1	18027	1	-2.27	12.73
REV3L	-45.69	12	-7.25	2.11e-13	29	1.31e-10	1	18026	1	-1.474	12.68
PPP2R4	-45.35	12	-7.19	3.17e-13	30	1.91e-10	1	18025	1	-1.995	12.5
GNA13	-44.31	12	-7.03	1.05e-12	31	6.13e-10	1	18024	1	-1.97	11.98
TIPRL	-43.7	12	-6.93	2.11e-12	32	1.19e-09	1	18023	1	-2.36	11.68
ERCC4	-42.57	12	-6.75	7.4e-12	33	4.05e-09	1	18022	1	-2.228	11.13
PKMYT1	-41.22	12	-6.53	3.21e-11	34	1.7e-08	1	18021	1	-1.647	10.49
GNA12	-39.66	12	-6.28	1.65e-10	35	8.53e-08	1	18020	1	-1.491	9.78
RAD1	-38.85	12	-6.15	3.76e-10	36	1.89e-07	1	18019	1	-2.708	9.42
RTEL1	-38.46	12	-6.09	5.56e-10	37	2.71e-07	1	18018	1	-3.241	9.25
HIRA	-38.42	12	-6.09	5.77e-10	38	2.74e-07	1	18017	1	-2.191	9.24
DOT1L	-38.28	12	-6.06	6.66e-10	40	3.01e-07	1	18015	1	-1.654	9.18
PCGF1	-34.97	10	-6.07	6.49e-10	39	3e-07	1	18016	1	-1.066	9.19
AMBRA1	-37.2	12	-5.89	1.92e-09	42	8.24e-07	1	18013	1	-1.391	8.72
FBXW11	-37.26	12	-5.9	1.81e-09	41	7.98e-07	1	18014	1	-1.729	8.74
RAD51B	-36.73	12	-5.82	3e-09	43	1.26e-06	1	18012	1	-1.994	8.52
SCAI	-36.29	12	-5.75	4.56e-09	44	1.87e-06	1	18011	1	-1.756	8.34
SNRNP40	-36.2	12	-5.73	5.01e-09	45	2.01e-06	1	18010	1	-1.423	8.3
SPTLC2	-36.04	12	-5.71	5.82e-09	46	2.28e-06	1	18009	1	-1.428	8.24
SPTLC1	-35.83	12	-5.67	7.05e-09	47	2.71e-06	1	18008	1	-2.074	8.15
ATG7	-35.58	12	-5.63	8.88e-09	48	3.34e-06	1	18007	1	-1.144	8.05
RAD18	-34.92	12	-5.53	1.63e-08	49	6.01e-06	1	18006	1	-1.933	7.79
TSSC1	-34.84	12	-5.51	1.76e-08	50	6.34e-06	1	18005	1	-1.738	7.75
CYB5R4	-34.71	12	-5.49	1.97e-08	51	6.97e-06	1	18004	1	-1.009	7.71
REV1	-34.37	12	-5.44	2.67e-08	52	9.28e-06	1	18003	1	-2.027	7.57
PPP2CA	-34.14	12	-5.4	3.3e-08	53	1.12e-05	1	18002	1	-1.433	7.48
LCMT1	-33.74	12	-5.34	4.69e-08	54	1.57e-05	1	18001	1	-1.156	7.33
SOCS3	-33.58	12	-5.31	5.43e-08	55	1.78e-05	1	18000	1	-1.394	7.27
FKBPL	-32.8	12	-5.19	1.07e-07	56	3.43e-05	1	17999	1	-1.381	6.97
DUT	-32.78	12	-5.18	1.08e-07	57	3.43e-05	1	17998	1	-3.21	6.97
CABIN1	-31.65	12	-5	2.81e-07	58	8.73e-05	1	17997	1	-1.308	6.55
DTYMK	-31.56	12	-4.99	3.03e-07	59	9.28e-05	1	17996	1	-1.338	6.52
RNASEH2A	-31.36	12	-4.96	3.58e-07	60	0.000108	1	17995	1	-1.17	6.45
CREBBP	-30.9	12	-4.88	5.18e-07	61	0.000153	1	17994	1	-1.46	6.29
CHTF8	-30.75	12	-4.86	5.85e-07	62	0.00017	1	17993	1	-1.373	6.23
ASF1A	-30.7	12	-4.85	6.1e-07	63	0.000175	1	17992	1	-1.103	6.21
PPP4C	-30.37	12	-4.8	7.95e-07	64	0.000224	1	17991	1	-2.353	6.1
RAD17	-30.29	12	-4.79	8.49e-07	65	0.000236	1	17990	1	-1.718	6.07
ANKRD49	-30.26	12	-4.78	8.68e-07	66	0.000237	1	17989	1	-1.821	6.06
COL4A3BP	-29.86	12	-4.72	1.19e-06	67	0.000321	1	17988	1	-1.996	5.92
PDS5A	-29.35	12	-4.64	1.77e-06	68	0.000471	1	17987	1	-1.705	5.75
PTBP1	-29.08	12	-4.59	2.18e-06	69	0.00057	1	17986	1	-1.753	5.66
B4GALT5	-28.76	12	-4.54	2.79e-06	71	0.000709	1	17984	1	-1.226	5.55
MGEA5	-28.78	12	-4.54	2.75e-06	70	0.000709	1	17985	1	-1.483	5.56
RAD51D	-28.54	12	-4.51	3.28e-06	72	0.000822	1	17983	1	-2.635	5.48
XRCC2	-28.2	12	-4.45	4.24e-06	73	0.00105	1	17982	1	-1.409	5.37
PDE7A	-24.25	9	-4.42	4.93e-06	74	0.0012	1	17981	1	-1.118	5.31
DNTTIP1	-27.87	12	-4.4	5.4e-06	76	0.00128	1	17979	1	-1.325	5.27
PAXIP1	-27.95	12	-4.41	5.12e-06	75	0.00123	1	17980	1	-1.64	5.29
ATR	-27.85	12	-4.4	5.51e-06	77	0.00129	1	17978	1	-2.597	5.26
TXNDC17	-27.82	12	-4.39	5.6e-06	78	0.0013	1	17977	1	-1.735	5.25
ANAPC15	-27.78	12	-4.39	5.79e-06	79	0.00132	1	17976	1	-1.181	5.24
ZFX	-27.73	12	-4.38	6e-06	80	0.00135	1	17975	1	-1.017	5.22
ATG9A	-27.53	12	-4.35	6.93e-06	81	0.00155	1	17974	1	-0.981	5.16
RAB14	-27.48	12	-4.34	7.19e-06	82	0.00158	1	17973	1	-1.16	5.14
PPP6C	-27.24	12	-4.3	8.58e-06	83	0.00187	1	17972	1	-1.843	5.07
VPS37A	-27.01	12	-4.26	1.01e-05	84	0.00217	1	17971	1	-1.295	5
DNM2	-26.96	12	-4.25	1.05e-05	85	0.00222	1	17970	1	-1.778	4.98
GABPB1	-26.43	12	-4.17	1.53e-05	86	0.0032	1	17969	1	-2.199	4.82
DCAF15	-26.18	12	-4.13	1.82e-05	87	0.00378	1	17968	1	-1.181	4.74
ATP6V0C	-26.01	12	-4.1	2.05e-05	88	0.00421	1	17967	1	-2.381	4.69
FARS2	-25.87	12	-4.08	2.26e-05	89	0.00458	1	17966	1	-0.899	4.65
TRAF2	-25.78	12	-4.07	2.4e-05	92	0.00471	1	17963	1	-1.03	4.62
ACTR6	-25.8	12	-4.07	2.36e-05	91	0.00468	1	17964	1	-2.324	4.63
N6AMT1	-25.84	12	-4.07	2.3e-05	90	0.00462	1	17965	1	-1.773	4.64
UBE3D	-25.74	12	-4.06	2.45e-05	93	0.00476	1	17962	1	-0.941	4.61
GNB1	-25.69	12	-4.05	2.55e-05	94	0.00489	1	17961	1	-1.05	4.59
EP300	-25.53	12	-4.03	2.83e-05	96	0.00533	1	17959	1	-0.843	4.55
C12orf44	-25.54	12	-4.03	2.82e-05	95	0.00533	1	17960	1	-0.728	4.55
SUB1	-22.1	9	-4.02	2.86e-05	97	0.00533	1	17958	1	-1.823	4.54
GPAA1	-25.48	12	-4.02	2.94e-05	98	0.00542	1	17957	1	-1.152	4.53
DHX35	-25.35	12	-4	3.22e-05	99	0.00587	1	17956	1	-1.112	4.49
ATXN7L3	-25.27	12	-3.98	3.39e-05	100	0.00613	1	17955	1	-0.976	4.47
AIP	-25.16	12	-3.97	3.65e-05	101	0.00652	1	17954	1	-0.899	4.44
HMGXB3	-25.13	12	-3.96	3.72e-05	102	0.00659	1	17953	1	-1.037	4.43
UBE2M	-25.02	12	-3.95	3.99e-05	103	0.00699	1	17952	1	-1.852	4.4
BRD9	-24.79	12	-3.91	4.65e-05	104	0.00808	1	17951	1	-1.157	4.33
ELMSAN1	-24.32	12	-3.83	6.34e-05	105	0.0109	1	17950	1	-0.912	4.2
ZNHIT1	-24.25	12	-3.82	6.65e-05	106	0.0113	1	17949	1	-1.261	4.18
UBE2N	-17.03	6	-3.79	7.4e-05	107	0.0125	1	17948	1	-1.663	4.13
ATG5	-23.83	12	-3.75	8.71e-05	108	0.0146	1	17947	1	-0.824	4.06
TRIM28	-23.69	12	-3.73	9.49e-05	111	0.0154	1	17944	1	-1.076	4.02
CSNK1A1	-23.76	12	-3.74	9.11e-05	109	0.0151	1	17946	1	-1.199	4.04
RHOA	-23.72	12	-3.74	9.35e-05	110	0.0153	1	17945	1	-1.504	4.03
OXSM	-23.66	12	-3.73	9.69e-05	112	0.0156	1	17943	1	-1.469	4.01
PPP1R8	-23.57	12	-3.71	0.000103	114	0.0162	1	17941	1	-1.593	3.99
TAF13	-23.59	12	-3.71	0.000102	113	0.0162	1	17942	1	-1.809	3.99
TRA2B	-23.52	12	-3.71	0.000106	115	0.0166	1	17940	1	-1.192	3.97
NOSIP	-23.41	12	-3.69	0.000114	116	0.0177	1	17939	1	-1.02	3.94
TEN1	-23.38	12	-3.68	0.000116	117	0.0179	1	17938	1	-1.097	3.94
GMEB1	-23.02	12	-3.62	0.000145	118	0.0221	1	17937	1	-0.798	3.84
MARS2	-22.44	12	-3.53	0.000206	119	0.0312	1	17936	1	-0.875	3.69
RAD54L	-22.42	12	-3.53	0.000209	120	0.0314	1	17935	1	-0.93	3.68
ZMIZ1	-22.19	12	-3.49	0.00024	122	0.0355	1	17933	1	-0.658	3.62
CSK	-22.19	12	-3.49	0.00024	121	0.0355	1	17934	1	-0.841	3.62
PAGR1	-22.09	12	-3.48	0.000255	123	0.0374	1	17932	1	-0.83	3.59
VARS2	-22.06	12	-3.47	0.000259	124	0.0377	1	17931	1	-0.851	3.59
OTUB1	-21.96	12	-3.45	0.000276	125	0.0398	1	17930	1	-0.77	3.56
PITPNB	-21.9	12	-3.45	0.000286	126	0.0409	1	17929	1	-0.708	3.54
TDP2	-21.83	12	-3.43	0.000297	129	0.0415	1	17926	1	-1.125	3.53
SZRD1	-21.87	12	-3.44	0.00029	127	0.0413	1	17928	1	-0.849	3.54
SLC25A28	-21.84	12	-3.44	0.000296	128	0.0415	1	17927	1	-1.321	3.53
CELF1	-21.8	12	-3.43	0.000302	130	0.0419	1	17925	1	-0.843	3.52
SEPSECS	-21.79	12	-3.43	0.000305	131	0.042	1	17924	1	-1.183	3.52
EDC3	-21.68	12	-3.41	0.000323	133	0.0439	1	17922	1	-0.73	3.49
BLM	-21.71	12	-3.41	0.000319	132	0.0437	1	17923	1	-0.926	3.5
ATP6V1B2	-21.6	12	-3.4	0.000341	134	0.0459	1	17921	1	-1.696	3.47
PIAS4	-21.48	12	-3.38	0.000364	135	0.0487	1	17920	1	-0.854	3.44
SAMD4B	-21.42	12	-3.37	0.000378	136	0.0501	1	17919	1	-1.314	3.42
PPP2R5C	-21.29	12	-3.35	0.000406	137	0.0535	1	17918	1	-0.892	3.39
CPSF4	-21.2	12	-3.33	0.000428	141	0.0548	1	17914	1	-0.872	3.37
TRAF3	-21.27	12	-3.34	0.000412	138	0.0539	1	17917	1	-0.846	3.39
EED	-21.2	12	-3.33	0.000428	140	0.0548	1	17915	1	-0.773	3.37
WDR7	-21.23	12	-3.34	0.000422	139	0.0548	1	17916	1	-0.944	3.37
SIK2	-21.15	12	-3.33	0.00044	142	0.0559	1	17913	1	-1.056	3.36
USP37	-21.12	12	-3.32	0.000448	143	0.0565	1	17912	1	-1.281	3.35
MECR	-21.02	12	-3.31	0.000474	144	0.0595	1	17911	1	-1.001	3.32
H2AFX	-20.89	12	-3.28	0.000512	145	0.0638	0.999	17910	1	-1.021	3.29
SIAH1	-20.85	12	-3.28	0.000523	146	0.0646	0.999	17909	1	-0.883	3.28
MEN1	-20.81	12	-3.27	0.000534	147	0.0656	0.999	17908	1	-1.005	3.27
KDM8	-20.72	12	-3.26	0.000562	149	0.0681	0.999	17906	1	-0.733	3.25
USF2	-20.75	12	-3.26	0.000553	148	0.0675	0.999	17907	1	-0.706	3.26
MEMO1	-20.66	12	-3.25	0.000581	151	0.0695	0.999	17904	1	-1.012	3.24
EEFSEC	-20.69	12	-3.25	0.000572	150	0.0689	0.999	17905	1	-0.967	3.24
RMI2	-20.61	12	-3.24	0.0006	152	0.0712	0.999	17903	1	-0.73	3.22
RB1CC1	-20.58	12	-3.24	0.000608	153	0.0712	0.999	17902	1	-0.743	3.22
BIRC6	-20.57	12	-3.23	0.000611	155	0.0712	0.999	17900	1	-1.049	3.21
FEN1	-20.58	12	-3.23	0.000609	154	0.0712	0.999	17901	1	-2.212	3.22
FOXM1	-20.47	12	-3.22	0.000648	157	0.0745	0.999	17898	1	-0.966	3.19
SNRPA	-20.5	12	-3.22	0.000636	156	0.0736	0.999	17899	1	-1.033	3.2
CSNK2A1	-17.69	9	-3.21	0.000664	159	0.075	0.999	17896	1	-1.191	3.18
MTA2	-20.42	12	-3.21	0.000664	160	0.075	0.999	17895	1	-1.08	3.18
TMEM30A	-20.43	12	-3.21	0.000662	158	0.075	0.999	17897	1	-0.814	3.18
NFKB2	-20.38	12	-3.2	0.000681	161	0.0764	0.999	17894	1	-0.651	3.17
KIAA2013	-20.35	12	-3.2	0.000691	162	0.077	0.999	17893	1	-0.786	3.16
TCEA1	-20.29	12	-3.19	0.000716	164	0.0781	0.999	17891	1	-0.799	3.15
NSMCE1	-20.29	12	-3.19	0.000714	163	0.0781	0.999	17892	1	-0.916	3.15
UFC1	-20.29	12	-3.19	0.000717	165	0.0781	0.999	17890	1	-1.227	3.14
HNRNPU	-20.26	12	-3.18	0.000727	168	0.0781	0.999	17887	1	-2.113	3.14
POLR2I	-20.27	12	-3.19	0.000722	167	0.0781	0.999	17888	1	-1.827	3.14
WRAP53	-20.27	12	-3.19	0.000722	166	0.0781	0.999	17889	1	-1.936	3.14
KDM5C	-20.21	12	-3.18	0.000748	169	0.0799	0.999	17886	1	-0.823	3.13
TRAIP	-20.05	12	-3.15	0.000817	170	0.0868	0.999	17885	1	-1.66	3.09
TAF11	-19.98	12	-3.14	0.000848	171	0.0895	0.999	17884	1	-0.324	3.07
DDX11	-19.88	12	-3.12	0.000896	172	0.0941	0.999	17883	1	-2.217	3.05
C7orf55-LUC7L2	-19.84	12	-3.12	0.000914	173	0.095	0.999	17882	1	-0.641	3.04
DET1	-19.79	12	-3.11	0.00094	178	0.095	0.999	17877	1	-0.806	3.03
CIC	-19.83	12	-3.12	0.000919	174	0.095	0.999	17881	1	-0.582	3.04
ZBTB7A	-19.8	12	-3.11	0.000934	176	0.095	0.999	17879	1	-0.809	3.03
MED15	-19.82	12	-3.11	0.000925	175	0.095	0.999	17880	1	-1.425	3.03
TAF3	-19.79	12	-3.11	0.000942	179	0.095	0.999	17876	1	-1.101	3.03
ACTR5	-19.79	12	-3.11	0.000939	177	0.095	0.999	17878	1	-0.75	3.03
PCBP2	-19.71	12	-3.1	0.000981	180	0.0979	0.999	17875	1	-1.297	3.01
PSTK	-19.71	12	-3.1	0.000982	181	0.0979	0.999	17874	1	-0.738	3.01
PIGB	-19.63	12	-3.08	0.00103	182	0.102	0.999	17873	1	-0.709	2.99
C9orf41	-19.6	12	-3.08	0.00104	184	0.102	0.999	17871	1	-1.161	2.98
THAP11	-19.6	12	-3.08	0.00104	183	0.102	0.999	17872	1	-0.691	2.98
SLC39A1	-19.52	12	-3.06	0.00109	185	0.106	0.999	17870	1	-1.046	2.96
GATAD2A	-19.52	12	-3.06	0.00109	186	0.106	0.999	17869	1	-0.722	2.96
STT3B	-19.47	12	-3.06	0.00112	187	0.108	0.999	17868	1	-1.113	2.95
PARS2	-19.44	12	-3.05	0.00113	188	0.109	0.999	17867	1	-0.692	2.95
NPEPPS	-19.41	12	-3.05	0.00115	189	0.11	0.999	17866	1	-0.849	2.94
CSTF1	-19.36	12	-3.04	0.00118	190	0.112	0.999	17865	1	-1.709	2.93
PARP1	-19.33	12	-3.03	0.00121	191	0.114	0.999	17864	1	-0.937	2.92
CITED2	-19.25	12	-3.02	0.00125	195	0.116	0.999	17860	1	-0.893	2.9
NASP	-19.29	12	-3.03	0.00123	192	0.115	0.999	17863	1	-1.144	2.91
BRCA1	-19.23	12	-3.02	0.00127	197	0.116	0.999	17858	1	-0.852	2.9
ATP6V0B	-19.28	12	-3.03	0.00123	193	0.115	0.999	17862	1	-1.134	2.91
MRPS12	-19.26	12	-3.02	0.00125	194	0.116	0.999	17861	1	-0.846	2.9
FZR1	-19.23	12	-3.02	0.00127	196	0.116	0.999	17859	1	-0.798	2.9
CPSF7	-19.13	12	-3	0.00134	198	0.122	0.999	17857	1	-0.803	2.87
PPIE	-19.08	12	-2.99	0.00137	200	0.124	0.999	17855	1	-1.043	2.86
PUM1	-19.09	12	-3	0.00137	199	0.124	0.999	17856	1	-0.755	2.86
TOE1	-19.02	12	-2.99	0.00141	201	0.126	0.999	17854	1	-1.222	2.85
RPE	-19.02	12	-2.99	0.00141	202	0.126	0.999	17853	1	-0.887	2.85
UBA5	-18.93	12	-2.97	0.00148	204	0.131	0.999	17851	1	-0.992	2.83
TELO2	-18.95	12	-2.97	0.00147	203	0.131	0.999	17852	1	-1.44	2.83
AUNIP	-18.9	12	-2.97	0.00151	205	0.133	0.998	17850	1	-0.767	2.82
MDH2	-18.89	12	-2.96	0.00152	206	0.133	0.998	17849	1	-0.462	2.82
PIGT	-18.84	12	-2.96	0.00156	208	0.135	0.998	17847	1	-0.667	2.81
GTF2H4	-18.86	12	-2.96	0.00154	207	0.134	0.998	17848	1	-1.737	2.81
SNAP29	-18.62	12	-2.92	0.00174	209	0.15	0.998	17846	1	-0.798	2.76
C10orf2	-18.59	12	-2.92	0.00177	210	0.152	0.998	17845	1	-0.608	2.75
EMC1	-18.54	12	-2.91	0.00181	211	0.155	0.998	17844	1	-0.708	2.74
MLLT4	-18.54	12	-2.91	0.00182	212	0.155	0.998	17843	1	-0.837	2.74
ATP6AP2	-18.5	12	-2.9	0.00185	213	0.156	0.998	17842	1	-0.673	2.73
PIGS	-18.5	12	-2.9	0.00185	214	0.156	0.998	17841	1	-0.752	2.73
QRSL1	-18.46	12	-2.9	0.00189	216	0.158	0.998	17839	1	-0.738	2.72
YEATS4	-18.47	12	-2.9	0.00188	215	0.158	0.998	17840	1	-1.235	2.73
GTF2H1	-18.45	12	-2.89	0.0019	218	0.158	0.998	17837	1	-0.971	2.72
ATP6V1A	-15.96	9	-2.89	0.00192	219	0.158	0.998	17836	1	-1.634	2.72
TM9SF2	-18.45	12	-2.89	0.0019	217	0.158	0.998	17838	1	-0.834	2.72
CHAF1A	-18.35	12	-2.88	0.002	220	0.164	0.998	17835	1	-1.433	2.7
XRCC3	-18.33	12	-2.88	0.00202	221	0.165	0.998	17834	1	-1.562	2.69
GUK1	-18.29	12	-2.87	0.00206	223	0.167	0.998	17832	1	-1.376	2.69
TOX4	-18.31	12	-2.87	0.00204	222	0.166	0.998	17833	1	-0.444	2.69
MVD	-18.19	12	-2.85	0.00217	224	0.175	0.998	17831	1	-1.038	2.66
SUZ12	-18.14	12	-2.85	0.00222	226	0.177	0.998	17829	1	-0.848	2.65
LEO1	-18.16	12	-2.85	0.0022	225	0.177	0.998	17830	1	-0.576	2.66
HARS2	-18	12	-2.82	0.00239	228	0.189	0.998	17827	1	-0.953	2.62
RFWD2	-18.01	12	-2.82	0.00237	227	0.188	0.998	17828	1	-0.594	2.63
APEX1	-17.96	12	-2.82	0.00243	229	0.191	0.998	17826	1	-1.017	2.61
INPP5K	-17.96	12	-2.82	0.00243	230	0.191	0.998	17825	1	-0.89	2.61
MCM9	-17.9	12	-2.81	0.00251	231	0.196	0.997	17824	1	-0.672	2.6
RNF168	-17.85	12	-2.8	0.00257	232	0.2	0.997	17823	1	-1.066	2.59
PTK2	-17.82	12	-2.79	0.00261	233	0.201	0.997	17822	1	-1.743	2.58
MDC1	-17.81	12	-2.79	0.00262	235	0.201	0.997	17820	1	-0.97	2.58
MARK2	-17.81	12	-2.79	0.00262	234	0.201	0.997	17821	1	-0.571	2.58
EMC7	-17.76	12	-2.78	0.00269	236	0.206	0.997	17819	1	-0.72	2.57
TUFM	-17.66	12	-2.77	0.00282	238	0.214	0.997	17817	1	-0.561	2.55
RING1	-17.7	12	-2.77	0.00277	237	0.211	0.997	17818	1	-0.74	2.56
VPS52	-17.61	12	-2.76	0.00289	239	0.218	0.997	17816	1	-1.181	2.54
SUPT3H	-17.4	12	-2.73	0.0032	240	0.241	0.997	17815	1	-1.506	2.49
AP1M1	-17.39	12	-2.72	0.00322	241	0.241	0.997	17814	1	-0.504	2.49
WDR61	-17.35	12	-2.72	0.00328	243	0.244	0.997	17812	1	-2.1	2.48
INTS10	-17.36	12	-2.72	0.00327	242	0.244	0.997	17813	1	-0.695	2.49
STUB1	-17.32	12	-2.71	0.00333	244	0.245	0.997	17811	1	-1.056	2.48
TADA2B	-17.3	12	-2.71	0.00336	247	0.245	0.997	17808	1	-0.955	2.47
SGMS1	-17.32	12	-2.71	0.00333	245	0.245	0.997	17810	1	-0.431	2.48
CNOT7	-17.31	12	-2.71	0.00334	246	0.245	0.997	17809	1	-0.458	2.48
CDH2	-17.2	12	-2.7	0.00352	250	0.254	0.996	17805	1	-0.735	2.45
ATP6V1F	-17.28	12	-2.71	0.00339	248	0.247	0.997	17807	1	-0.516	2.47
GFM1	-17.21	12	-2.7	0.00351	249	0.254	0.996	17806	1	-0.653	2.45
WASL	-17.16	12	-2.69	0.00359	251	0.256	0.996	17804	1	-0.653	2.44
CDC25B	-17.16	12	-2.69	0.00359	252	0.256	0.996	17803	1	-0.809	2.44
SUV39H1	-17.1	12	-2.68	0.0037	257	0.26	0.996	17798	1	-0.651	2.43
MRPL53	-17.14	12	-2.68	0.00363	255	0.257	0.996	17800	1	-0.581	2.44
WDR83OS	-17.14	12	-2.68	0.00363	254	0.257	0.996	17801	1	-0.665	2.44
ATP6V1C1	-17.16	12	-2.69	0.00359	253	0.256	0.996	17802	1	-0.828	2.44
SLC2A1	-17.07	12	-2.67	0.00375	259	0.261	0.996	17796	1	-0.694	2.43
HSBP1	-17.12	12	-2.68	0.00366	256	0.258	0.996	17799	1	-0.519	2.44
TMX2	-17.05	12	-2.67	0.00378	260	0.262	0.996	17795	1	-0.497	2.42
MTF1	-17.08	12	-2.68	0.00373	258	0.261	0.996	17797	1	-0.531	2.43
DMAP1	-17.02	12	-2.67	0.00384	261	0.266	0.996	17794	1	-0.914	2.42
SETD1B	-16.99	12	-2.66	0.0039	262	0.269	0.996	17793	1	-0.542	2.41
MTG2	-16.97	12	-2.66	0.00394	263	0.271	0.996	17792	1	-0.581	2.4
CLASRP	-16.93	12	-2.65	0.00402	264	0.275	0.996	17791	1	-0.784	2.4
GCSH	-16.89	12	-2.65	0.00408	265	0.277	0.996	17790	1	-0.773	2.39
RARS2	-16.87	12	-2.64	0.00412	267	0.279	0.996	17788	1	-0.373	2.39
ATG10	-16.89	12	-2.64	0.00409	266	0.277	0.996	17789	1	-0.761	2.39
UBE2S	-16.79	12	-2.63	0.00429	268	0.288	0.996	17787	1	-0.823	2.37
RAD51C	-16.77	12	-2.63	0.00432	270	0.289	0.996	17785	1	-1.281	2.36
RAB3GAP2	-16.78	12	-2.63	0.00429	269	0.288	0.996	17786	1	-0.842	2.37
BRD4	-16.7	12	-2.61	0.00447	271	0.298	0.996	17784	1	-0.792	2.35
KAT6A	-16.67	12	-2.61	0.00453	272	0.301	0.995	17783	1	-0.475	2.34
UFM1	-16.64	12	-2.61	0.00459	273	0.302	0.995	17782	1	-0.429	2.34
SPAG5	-16.64	12	-2.6	0.0046	274	0.302	0.995	17781	1	-0.658	2.34
KPNA2	-16.64	12	-2.6	0.0046	275	0.302	0.995	17780	1	-0.786	2.34
UFL1	-16.58	12	-2.6	0.00472	278	0.307	0.995	17777	1	-1.153	2.33
CDKN2AIP	-16.61	12	-2.6	0.00465	276	0.304	0.995	17779	1	-0.718	2.33
CCDC115	-16.59	12	-2.6	0.00471	277	0.307	0.995	17778	1	-0.829	2.33
ATG3	-16.5	12	-2.58	0.00491	279	0.318	0.995	17776	1	-0.833	2.31
UBA3	-16.47	12	-2.58	0.00497	280	0.321	0.995	17775	1	-1.47	2.3
WARS2	-16.44	12	-2.57	0.00505	282	0.322	0.995	17773	1	-0.654	2.3
FUBP3	-16.43	12	-2.57	0.00505	283	0.322	0.995	17772	1	-0.753	2.3
EMC6	-16.44	12	-2.57	0.00503	281	0.322	0.995	17774	1	-0.81	2.3
ARHGDIA	-16.38	12	-2.56	0.00518	284	0.33	0.995	17771	1	-0.644	2.29
PSENEN	-16.36	12	-2.56	0.00523	285	0.331	0.995	17770	1	-0.788	2.28
PPIL1	-16.34	12	-2.56	0.00528	286	0.333	0.995	17769	1	-0.672	2.28
KATNB1	-16.29	12	-2.55	0.00539	287	0.339	0.995	17768	1	-0.624	2.27
NCAPH2	-16.26	12	-2.54	0.00548	288	0.344	0.995	17767	1	-0.665	2.26
EGLN1	-16.23	12	-2.54	0.00555	289	0.346	0.994	17766	1	-1.123	2.26
CYFIP1	-16.22	12	-2.54	0.00558	291	0.346	0.994	17764	1	-0.875	2.25
PNKP	-16.22	12	-2.54	0.00557	290	0.346	0.994	17765	1	-0.854	2.25
NCSTN	-16.19	12	-2.53	0.00565	292	0.35	0.994	17763	1	-0.697	2.25
NAE1	-16.17	12	-2.53	0.00571	293	0.352	0.994	17762	1	-1.434	2.24
SPEN	-16.14	12	-2.52	0.00579	294	0.356	0.994	17761	1	-0.887	2.24
DOHH	-16.1	12	-2.52	0.00589	295	0.361	0.994	17760	1	-1.096	2.23
SMEK1	-16.07	12	-2.51	0.00596	296	0.362	0.994	17759	1	-0.654	2.22
EARS2	-16.07	12	-2.51	0.00598	298	0.362	0.994	17757	1	-0.767	2.22
DRD5	-16.07	12	-2.51	0.00597	297	0.362	0.994	17758	1	-1.071	2.22
ARF1	-16.05	12	-2.51	0.00603	299	0.364	0.994	17756	1	-0.682	2.22
FOXC2	-15.99	12	-2.5	0.00619	300	0.373	0.994	17755	1	-0.944	2.21
GNB1L	-13.83	9	-2.5	0.00626	301	0.376	0.994	17754	1	-1.108	2.2
SFR1	-15.85	12	-2.48	0.00659	302	0.394	0.993	17753	1	-0.757	2.18
ESRRA	-15.84	12	-2.48	0.00662	303	0.394	0.993	17752	1	-0.45	2.18
TAF8	-15.82	12	-2.47	0.00669	305	0.396	0.993	17750	1	-0.683	2.17
DAP3	-15.8	12	-2.47	0.00673	306	0.397	0.993	17749	1	-0.745	2.17
SIK1	-15.83	12	-2.47	0.00667	304	0.396	0.993	17751	1	-0.854	2.18
SRSF11	-15.76	12	-2.46	0.00687	308	0.403	0.993	17747	1	-1.339	2.16
HMGCS1	-15.77	12	-2.47	0.00682	307	0.401	0.993	17748	1	-1.587	2.17
MLLT1	-15.75	12	-2.46	0.0069	309	0.403	0.993	17746	1	-0.46	2.16
GLG1	-15.69	12	-2.45	0.00708	310	0.412	0.993	17745	1	-0.595	2.15
DOLK	-15.68	12	-2.45	0.00712	311	0.413	0.993	17744	1	-0.941	2.15
ARHGEF12	-15.62	12	-2.44	0.00731	312	0.423	0.993	17743	1	-0.385	2.14
SLC35A2	-15.58	12	-2.44	0.00744	313	0.428	0.993	17742	1	-0.721	2.13
HIF1AN	-15.58	12	-2.44	0.00745	314	0.428	0.993	17741	1	-0.578	2.13
P2RX5	-15.56	12	-2.43	0.00749	315	0.43	0.993	17740	1	-0.565	2.13
CCDC101	-15.42	12	-2.41	0.00796	317	0.454	0.992	17738	1	-0.556	2.1
ERCC2	-15.44	12	-2.41	0.00792	316	0.453	0.992	17739	1	-1.347	2.1
GSG2	-15.37	12	-2.4	0.00817	319	0.463	0.992	17736	1	-0.593	2.09
CMPK1	-15.32	12	-2.39	0.00832	322	0.466	0.992	17733	1	-0.978	2.08
CCNT1	-15.38	12	-2.4	0.00813	318	0.462	0.992	17737	1	-0.575	2.09
CMTR2	-15.35	12	-2.4	0.00823	320	0.465	0.992	17735	1	-1.236	2.08
MRPS23	-15.33	12	-2.4	0.00828	321	0.466	0.992	17734	1	-0.56	2.08
KLF2	-15.31	12	-2.39	0.00839	324	0.467	0.992	17731	1	-0.52	2.08
UBE4B	-15.32	12	-2.39	0.00835	323	0.467	0.992	17732	1	-0.647	2.08
RXFP4	-15.27	12	-2.39	0.00851	325	0.473	0.991	17730	1	-0.489	2.07
PRPF4B	-15.25	12	-2.38	0.00858	326	0.475	0.991	17729	1	-0.742	2.07
CDCA5	-15.21	12	-2.38	0.00873	327	0.482	0.991	17728	1	-0.828	2.06
NACC1	-15.15	12	-2.37	0.00899	329	0.492	0.991	17726	1	-0.677	2.05
BARD1	-15.14	12	-2.37	0.009	330	0.492	0.991	17725	1	-0.852	2.05
ATP6V1H	-15.14	12	-2.36	0.00903	331	0.492	0.991	17724	1	-0.549	2.04
HDAC3	-15.15	12	-2.37	0.00898	328	0.492	0.991	17727	1	-1.35	2.05
SRSF7	-15.13	12	-2.36	0.00904	332	0.492	0.991	17723	1	-0.735	2.04
BCL9L	-13.07	9	-2.36	0.0092	333	0.499	0.991	17722	1	-0.433	2.04
CXXC1	-15.04	12	-2.35	0.00942	334	0.509	0.991	17721	1	-0.614	2.03
RBM10	-14.97	12	-2.34	0.0097	336	0.521	0.99	17719	1	-0.676	2.01
FNDC4	-14.99	12	-2.34	0.00961	335	0.518	0.99	17720	1	-0.453	2.02
PI4KB	-14.91	12	-2.33	0.00994	339	0.529	0.99	17716	1	-1.093	2
NAA40	-14.94	12	-2.33	0.00983	337	0.526	0.99	17718	1	-1.23	2.01
TBC1D10B	-14.93	12	-2.33	0.00985	338	0.526	0.99	17717	1	-0.54	2.01
PPRC1	-14.9	12	-2.33	0.00998	340	0.529	0.99	17715	1	-0.592	2
MARK4	-14.87	12	-2.32	0.0101	343	0.532	0.99	17712	1	-0.309	2
SMARCD1	-14.89	12	-2.33	0.01	341	0.529	0.99	17714	1	-0.559	2
C19orf25	-14.89	12	-2.33	0.01	342	0.529	0.99	17713	1	-1.215	2
MRPL37	-14.84	12	-2.32	0.0102	345	0.536	0.99	17710	1	-0.495	1.99
CTC1	-14.85	12	-2.32	0.0102	344	0.536	0.99	17711	1	-1.798	1.99
TMEM151A	-14.77	12	-2.31	0.0105	346	0.55	0.989	17709	1	-0.492	1.98
COLEC11	-14.74	12	-2.3	0.0107	347	0.554	0.989	17708	1	-0.185	1.97
RGS12	-14.73	12	-2.3	0.0107	350	0.554	0.989	17705	1	-0.323	1.97
YARS2	-14.73	12	-2.3	0.0107	349	0.554	0.989	17706	1	-0.639	1.97
HTATSF1	-14.74	12	-2.3	0.0107	348	0.554	0.989	17707	1	-1.296	1.97
DLAT	-14.68	12	-2.29	0.011	353	0.561	0.989	17702	1	-0.529	1.96
ATP6V1E1	-14.71	12	-2.3	0.0108	352	0.556	0.989	17703	1	-0.856	1.97
HTT	-14.71	12	-2.3	0.0108	351	0.556	0.989	17704	1	-0.698	1.97
KMT2A	-14.67	12	-2.29	0.011	354	0.561	0.989	17701	1	-0.876	1.96
SARS2	-14.65	12	-2.29	0.0111	355	0.565	0.989	17700	1	-0.696	1.95
MAML1	-14.63	12	-2.28	0.0112	356	0.568	0.989	17699	1	-0.642	1.95
LPCAT3	-13.33	10	-2.28	0.0113	357	0.573	0.989	17698	1	-0.546	1.95
SETD2	-14.57	12	-2.27	0.0115	359	0.576	0.989	17696	1	-0.968	1.94
MRPS11	-14.57	12	-2.27	0.0115	358	0.576	0.989	17697	1	-0.593	1.94
MMGT1	-14.55	12	-2.27	0.0116	362	0.577	0.988	17693	1	-0.742	1.94
DRAP1	-14.54	12	-2.27	0.0116	364	0.578	0.988	17691	1	-1.085	1.94
GATAD2B	-14.55	12	-2.27	0.0116	361	0.577	0.988	17694	1	-0.571	1.94
DNAJC8	-14.57	12	-2.27	0.0115	360	0.576	0.989	17695	1	-0.747	1.94
ERI1	-14.54	12	-2.27	0.0116	363	0.578	0.988	17692	1	-0.735	1.94
CHIC2	-14.5	12	-2.26	0.0118	366	0.583	0.988	17689	1	-0.831	1.93
SNRPB2	-13.89	11	-2.26	0.0118	365	0.583	0.988	17690	1	-0.884	1.93
EIF4E2	-14.47	12	-2.26	0.012	368	0.586	0.988	17687	1	-0.516	1.92
BOD1L1	-14.45	12	-2.25	0.0121	370	0.589	0.988	17685	1	-0.868	1.92
TCEB2	-14.44	12	-2.25	0.0121	371	0.589	0.988	17684	1	-1.641	1.92
TRNAU1AP	-14.47	12	-2.26	0.012	369	0.586	0.988	17686	1	-0.756	1.92
C1orf86	-14.44	12	-2.25	0.0121	372	0.589	0.988	17683	1	-0.5	1.92
CDYL	-14.48	12	-2.26	0.0119	367	0.586	0.988	17688	1	-0.448	1.92
C1QBP	-14.4	12	-2.25	0.0123	373	0.597	0.988	17682	1	-0.575	1.91
SUPT4H1	-14.35	12	-2.24	0.0126	377	0.602	0.987	17678	1	-0.786	1.9
GPATCH8	-14.38	12	-2.24	0.0124	374	0.599	0.988	17681	1	-0.647	1.91
AHCYL1	-14.37	12	-2.24	0.0125	376	0.599	0.988	17679	1	-0.626	1.9
NCOA4	-14.31	12	-2.23	0.0128	379	0.61	0.987	17676	1	-0.573	1.89
PALB2	-14.38	12	-2.24	0.0124	375	0.599	0.988	17680	1	-0.958	1.91
PIGM	-14.34	12	-2.24	0.0126	378	0.603	0.987	17677	1	-0.596	1.9
SEMA3G	-14.24	12	-2.22	0.0132	381	0.625	0.987	17674	1	-0.383	1.88
MAPK14	-14.25	12	-2.22	0.0131	380	0.624	0.987	17675	1	-0.669	1.88
MRPS14	-14.21	12	-2.22	0.0133	383	0.628	0.987	17672	1	-0.802	1.88
PCSK7	-14.18	12	-2.21	0.0135	385	0.634	0.986	17670	1	-0.668	1.87
PRKAR1A	-14.18	12	-2.21	0.0135	384	0.634	0.987	17671	1	-0.828	1.87
STK11	-14.11	12	-2.2	0.0139	389	0.645	0.986	17666	1	-0.979	1.86
VMA21	-14.22	12	-2.22	0.0133	382	0.627	0.987	17673	1	-0.568	1.88
OBFC1	-14.15	12	-2.21	0.0137	386	0.639	0.986	17669	1	-0.598	1.86
TADA1	-14.14	12	-2.2	0.0137	387	0.64	0.986	17668	1	-1.931	1.86
LARS2	-14.12	12	-2.2	0.0138	388	0.643	0.986	17667	1	-0.581	1.86
BRPF1	-14.03	12	-2.19	0.0144	391	0.663	0.986	17664	1	-0.549	1.84
PAPOLA	-14.03	12	-2.19	0.0143	390	0.663	0.986	17665	1	-0.691	1.84
MAEA	-13.98	12	-2.18	0.0146	392	0.675	0.985	17663	1	-0.722	1.84
MRPL28	-13.95	12	-2.18	0.0148	393	0.678	0.985	17662	1	-0.301	1.83
SIVA1	-13.95	12	-2.18	0.0148	394	0.678	0.985	17661	1	-0.582	1.83
POLE4	-13.92	12	-2.17	0.015	395	0.684	0.985	17660	1	-0.386	1.82
LENG8	-13.9	12	-2.17	0.0151	398	0.686	0.985	17657	1	-0.529	1.82
WDR83	-13.91	12	-2.17	0.015	396	0.684	0.985	17659	1	-0.56	1.82
TEFM	-13.91	12	-2.17	0.015	397	0.684	0.985	17658	1	-0.746	1.82
RECQL5	-13.89	12	-2.17	0.0152	399	0.686	0.985	17656	1	-0.541	1.82
UBE2K	-13.87	12	-2.16	0.0153	400	0.69	0.985	17655	1	-0.46	1.82
TMEM129	-13.86	12	-2.16	0.0153	401	0.69	0.985	17654	1	-0.371	1.82
GLTSCR1	-13.86	12	-2.16	0.0154	402	0.691	0.985	17653	1	-0.484	1.81
FBXL19	-13.83	12	-2.16	0.0156	405	0.694	0.984	17650	1	-0.457	1.81
SIX3	-13.84	12	-2.16	0.0155	404	0.693	0.984	17651	1	-0.511	1.81
TSFM	-13.81	12	-2.15	0.0157	407	0.694	0.984	17648	1	-0.538	1.8
CCNF	-11.98	9	-2.16	0.0155	403	0.693	0.984	17652	1	-0.769	1.81
FBXL18	-13.82	12	-2.15	0.0156	406	0.694	0.984	17649	1	-0.557	1.81
MEIS3	-12.51	10	-2.14	0.0163	409	0.721	0.984	17646	1	-0.242	1.79
MGAT3	-13.72	12	-2.14	0.0162	408	0.718	0.984	17647	1	-0.422	1.79
KLF16	-13.7	12	-2.13	0.0164	410	0.722	0.984	17645	1	-0.698	1.79
DYNC1LI2	-13.68	12	-2.13	0.0165	411	0.726	0.983	17644	1	-0.697	1.78
UBA6	-13.65	12	-2.13	0.0167	413	0.729	0.983	17642	1	-0.462	1.78
COG8	-13.66	12	-2.13	0.0167	412	0.729	0.983	17643	1	-0.688	1.78
STRAP	-13.63	12	-2.12	0.0169	414	0.736	0.983	17641	1	-1.042	1.77
CTNND1	-13.59	12	-2.12	0.0171	418	0.74	0.983	17637	1	-0.375	1.77
MRPL14	-13.6	12	-2.12	0.017	415	0.74	0.983	17640	1	-0.468	1.77
CCDC96	-13.59	12	-2.12	0.0171	416	0.74	0.983	17639	1	-0.432	1.77
UBIAD1	-13.59	12	-2.12	0.0171	417	0.74	0.983	17638	1	-0.581	1.77
ZMYM4	-13.56	12	-2.11	0.0173	420	0.746	0.983	17635	1	-0.525	1.76
FBXW5	-13.54	12	-2.11	0.0175	421	0.75	0.983	17634	1	-0.582	1.76
VAPA	-11.74	9	-2.11	0.0173	419	0.746	0.983	17636	1	-0.721	1.76
PDHA1	-13.52	12	-2.11	0.0176	422	0.75	0.982	17633	1	-0.375	1.75
MRPS34	-13.52	12	-2.11	0.0176	423	0.75	0.982	17632	1	-0.493	1.75
FANCF	-13.48	12	-2.1	0.0178	425	0.758	0.982	17630	1	-0.465	1.75
AP1G1	-13.47	12	-2.1	0.0179	427	0.758	0.982	17628	1	-0.618	1.75
CLASP2	-13.49	12	-2.1	0.0178	424	0.757	0.982	17631	1	-0.707	1.75
SCYL1	-13.47	12	-2.1	0.0179	426	0.758	0.982	17629	1	-0.459	1.75
TAF6L	-13.44	12	-2.09	0.0181	429	0.763	0.982	17626	1	-0.921	1.74
WDHD1	-13.44	12	-2.09	0.0181	428	0.763	0.982	17627	1	-1.396	1.74
BRCA2	-13.41	12	-2.09	0.0184	433	0.766	0.982	17622	1	-0.473	1.74
MED22	-13.41	12	-2.09	0.0183	432	0.766	0.982	17623	1	-0.647	1.74
PCBP1	-13.44	12	-2.09	0.0182	430	0.763	0.982	17625	1	-0.936	1.74
GMEB2	-13.42	12	-2.09	0.0183	431	0.766	0.982	17624	1	-0.517	1.74
SMNDC1	-13.37	12	-2.08	0.0186	437	0.77	0.981	17618	1	-1.346	1.73
UBE2D3	-9.47	6	-2.09	0.0184	434	0.767	0.982	17621	1	-0.56	1.74
PIGV	-13.38	12	-2.08	0.0186	435	0.77	0.981	17620	1	-0.688	1.73
TMEM127	-13.36	12	-2.08	0.0187	438	0.772	0.981	17617	1	-0.429	1.73
MMS19	-13.38	12	-2.08	0.0186	436	0.77	0.981	17619	1	-0.568	1.73
HSF1	-13.34	12	-2.08	0.0189	439	0.777	0.981	17616	1	-0.544	1.72
PFN1	-13.33	12	-2.08	0.0189	440	0.777	0.981	17615	1	-0.635	1.72
PPIL2	-13.33	12	-2.08	0.019	441	0.777	0.981	17614	1	-1.358	1.72
CSDE1	-13.31	12	-2.07	0.0191	442	0.782	0.981	17613	1	-0.62	1.72
LIN37	-13.26	12	-2.07	0.0194	443	0.793	0.981	17612	1	-0.281	1.71
ADAT3	-13.18	12	-2.05	0.0201	448	0.808	0.98	17607	1	-0.777	1.7
CCNY	-13.23	12	-2.06	0.0197	444	0.802	0.98	17611	1	-0.511	1.71
SLC38A2	-13.21	12	-2.06	0.0198	445	0.805	0.98	17610	1	-0.749	1.7
VPS35	-11.43	9	-2.05	0.0199	446	0.807	0.98	17609	1	-0.702	1.7
PAX6	-12.63	11	-2.05	0.02	447	0.807	0.98	17608	1	-0.434	1.7
PPP1R37	-13.16	12	-2.05	0.0202	449	0.813	0.98	17606	1	-0.275	1.69
RNF214	-13.16	12	-2.05	0.0203	450	0.813	0.98	17605	1	-0.523	1.69
MRPS18B	-13.15	12	-2.05	0.0203	451	0.813	0.98	17604	1	-0.623	1.69
PTPMT1	-13.13	12	-2.04	0.0205	452	0.818	0.98	17603	1	-1.296	1.69
FRAT1	-13.13	12	-2.04	0.0205	453	0.818	0.979	17602	1	-0.393	1.69
COG7	-13.11	12	-2.04	0.0206	454	0.819	0.979	17601	1	-0.714	1.69
HNRNPA1	-9.27	6	-2.04	0.0206	455	0.819	0.979	17600	1	-0.46	1.69
DNASE2	-13.05	12	-2.03	0.0211	459	0.83	0.979	17596	1	-0.53	1.68
MOB4	-13.07	12	-2.03	0.021	457	0.829	0.979	17598	1	-0.644	1.68
ILF3	-13.08	12	-2.04	0.0209	456	0.827	0.979	17599	1	-0.703	1.68
C17orf53	-13.05	12	-2.03	0.0212	460	0.83	0.979	17595	1	-0.368	1.67
SPON2	-13.05	12	-2.03	0.0211	458	0.83	0.979	17597	1	-0.556	1.68
MRPL43	-13.02	12	-2.03	0.0214	461	0.836	0.979	17594	1	-0.636	1.67
RPAP3	-13	12	-2.02	0.0215	462	0.84	0.979	17593	1	-0.822	1.67
TMEM208	-12.98	12	-2.02	0.0217	463	0.847	0.978	17592	1	-0.511	1.66
KCNC4	-12.97	12	-2.02	0.0218	464	0.849	0.978	17591	1	-0.48	1.66
CHD1L	-12.93	12	-2.01	0.0221	465	0.857	0.978	17590	1	-0.4	1.66
MYO1F	-12.92	12	-2.01	0.0222	467	0.858	0.978	17588	1	-0.486	1.65
SAP30	-12.92	12	-2.01	0.0222	468	0.858	0.978	17587	1	-0.391	1.65
ZCCHC11	-12.92	12	-2.01	0.0222	466	0.858	0.978	17589	1	-0.709	1.65
SRCAP	-12.9	12	-2.01	0.0224	469	0.861	0.978	17586	1	-0.884	1.65
POLR2M	-12.88	12	-2	0.0226	470	0.865	0.977	17585	1	-0.332	1.65
SOD3	-12.88	12	-2	0.0226	471	0.865	0.977	17584	1	-0.377	1.65
UBN1	-12.86	12	-2	0.0227	473	0.865	0.977	17582	1	-0.713	1.64
ZFP36L1	-12.87	12	-2	0.0227	472	0.865	0.977	17583	1	-0.66	1.64
GPR4	-12.86	12	-2	0.0227	474	0.865	0.977	17581	1	-0.521	1.64
ZNF574	-12.83	12	-2	0.023	475	0.874	0.977	17580	1	-0.564	1.64
LIAS	-12.82	12	-1.99	0.0231	476	0.875	0.977	17579	1	-0.484	1.64
BRK1	-12.75	12	-1.98	0.0237	480	0.89	0.976	17575	1	-0.6	1.63
PAN3	-12.77	12	-1.99	0.0235	477	0.888	0.977	17578	1	-0.739	1.63
ATMIN	-12.77	12	-1.99	0.0235	478	0.888	0.976	17577	1	-0.449	1.63
RAB3GAP1	-12.73	12	-1.98	0.0239	481	0.896	0.976	17574	1	-0.426	1.62
BRD2	-12.75	12	-1.98	0.0237	479	0.89	0.976	17576	1	-0.674	1.63
SPTSSA	-12.7	12	-1.98	0.0241	483	0.901	0.976	17572	1	-0.499	1.62
BAZ1B	-12.72	12	-1.98	0.024	482	0.897	0.976	17573	1	-0.422	1.62
MRPL4	-12.7	12	-1.97	0.0241	484	0.901	0.976	17571	1	-0.599	1.62
SACS	-12.67	12	-1.97	0.0244	485	0.907	0.976	17570	1	-0.571	1.61
DUS1L	-12.66	12	-1.97	0.0245	487	0.908	0.975	17568	1	-0.575	1.61
CLDN4	-12.64	12	-1.97	0.0246	490	0.908	0.975	17565	1	-0.414	1.61
MRPS24	-12.67	12	-1.97	0.0244	486	0.907	0.976	17569	1	-0.476	1.61
C17orf70	-12.65	12	-1.97	0.0246	488	0.908	0.975	17567	1	-0.528	1.61
FKBP9	-12.65	12	-1.97	0.0246	489	0.908	0.975	17566	1	-0.447	1.61
RNASEK	-12.58	12	-1.96	0.0253	491	0.921	0.975	17564	1	-0.62	1.6
COX8A	-12.55	12	-1.95	0.0255	492	0.921	0.974	17563	1	-0.448	1.59
KLF14	-12.54	12	-1.95	0.0256	494	0.921	0.974	17561	1	-0.309	1.59
ATG12	-12.54	12	-1.95	0.0257	496	0.921	0.974	17559	1	-0.735	1.59
WBSCR16	-12.55	12	-1.95	0.0256	493	0.921	0.974	17562	1	-0.386	1.59
SLCO4A1	-12.54	12	-1.95	0.0256	495	0.921	0.974	17560	1	-0.358	1.59
ZAR1	-12.52	12	-1.95	0.0259	498	0.921	0.974	17557	1	-0.434	1.59
XPO6	-12.52	12	-1.95	0.0258	497	0.921	0.974	17558	1	-0.396	1.59
NBN	-12.51	12	-1.94	0.0259	499	0.921	0.974	17556	1	-0.321	1.59
SPRED3	-12.51	12	-1.94	0.0259	500	0.921	0.974	17555	1	-0.573	1.59
ITFG2	-12.48	12	-1.94	0.0262	501	0.921	0.974	17554	1	-0.243	1.58
CNEP1R1	-12.47	12	-1.94	0.0263	502	0.921	0.974	17553	1	-0.388	1.58
TRIB1	-12.41	12	-1.93	0.0269	504	0.921	0.973	17551	1	-0.476	1.57
UNC50	-12.43	12	-1.93	0.0267	503	0.921	0.973	17552	1	-0.396	1.57
RNF7	-12.41	12	-1.93	0.0269	505	0.921	0.973	17550	1	-0.594	1.57
DYRK1A	-12.39	12	-1.92	0.0271	506	0.921	0.973	17549	1	-0.574	1.57
TCF25	-12.36	12	-1.92	0.0274	511	0.921	0.973	17544	1	-0.467	1.56
MRPL54	-12.38	12	-1.92	0.0272	508	0.921	0.973	17547	1	-0.373	1.57
COASY	-12.37	12	-1.92	0.0272	509	0.921	0.973	17546	1	-0.492	1.57
MXRA8	-12.38	12	-1.92	0.0272	507	0.921	0.973	17548	1	-0.31	1.57
DNAJC9	-12.32	12	-1.91	0.0278	513	0.921	0.972	17542	1	-1.154	1.56
SUPV3L1	-12.37	12	-1.92	0.0273	510	0.921	0.973	17545	1	-0.384	1.56
POR	-12.32	12	-1.91	0.0278	512	0.921	0.972	17543	1	-0.304	1.56
SLX4	-12.3	12	-1.91	0.028	514	0.921	0.972	17541	1	-0.853	1.55
HMGCR	-12.29	12	-1.91	0.0281	516	0.921	0.972	17539	1	-0.993	1.55
AP2S1	-12.29	12	-1.91	0.0281	517	0.921	0.972	17538	1	-0.504	1.55
ARPC4	-12.27	12	-1.91	0.0283	518	0.921	0.972	17537	1	-1.276	1.55
MCMBP	-12.29	12	-1.91	0.0281	515	0.921	0.972	17540	1	-1	1.55
NDRG4	-12.25	12	-1.9	0.0285	520	0.921	0.971	17535	1	-0.409	1.55
VHL	-12.26	12	-1.9	0.0284	519	0.921	0.972	17536	1	-0.837	1.55
GNB2	-12.24	12	-1.9	0.0286	521	0.921	0.971	17534	1	-0.62	1.54
B3GALT6	-9.32	7	-1.9	0.0289	524	0.921	0.971	17531	1	-0.122	1.54
SERPINF2	-12.18	12	-1.89	0.0292	528	0.921	0.971	17527	1	-0.556	1.53
EMC4	-12.21	12	-1.9	0.0289	523	0.921	0.971	17532	1	-0.472	1.54
ZMYND11	-12.22	12	-1.9	0.0289	522	0.921	0.971	17533	1	-0.2	1.54
VHLL	-12.2	12	-1.89	0.0291	525	0.921	0.971	17530	1	-0.436	1.54
PIGG	-12.18	12	-1.89	0.0292	527	0.921	0.971	17528	1	-0.669	1.53
MED23	-12.19	12	-1.89	0.0291	526	0.921	0.971	17529	1	-0.621	1.54
MCAT	-12.14	12	-1.89	0.0296	529	0.921	0.97	17526	1	-0.615	1.53
MRPL34	-12.1	12	-1.88	0.0301	530	0.921	0.97	17525	0.999	-0.561	1.52
ORC6	-12.1	12	-1.88	0.0301	531	0.921	0.97	17524	0.999	-0.322	1.52
DHODH	-12.06	12	-1.87	0.0306	532	0.921	0.969	17523	0.999	-0.378	1.51
TSNAXIP1	-12.05	12	-1.87	0.0307	533	0.921	0.969	17522	0.999	-0.445	1.51
DLGAP4	-12.03	12	-1.87	0.0308	534	0.921	0.969	17521	0.999	-0.346	1.51
AKAP10	-12.02	12	-1.87	0.031	536	0.921	0.969	17519	0.999	-0.347	1.51
ELN	-12.02	12	-1.87	0.031	535	0.921	0.969	17520	0.999	-0.288	1.51
SEPHS1	-11.99	12	-1.86	0.0313	537	0.921	0.969	17518	0.998	-0.523	1.5
TMEM102	-11.99	12	-1.86	0.0314	539	0.921	0.969	17516	0.998	-0.472	1.5
B9D2	-11.96	12	-1.86	0.0317	541	0.921	0.968	17514	0.998	-0.624	1.5
SUPT7L	-11.99	12	-1.86	0.0313	538	0.921	0.969	17517	0.998	-0.784	1.5
NFKBIE	-11.93	12	-1.85	0.032	543	0.921	0.968	17512	0.998	-0.497	1.49
IZUMO2	-11.96	12	-1.86	0.0316	540	0.921	0.968	17515	0.998	-0.515	1.5
SLC10A7	-11.96	12	-1.86	0.0317	542	0.921	0.968	17513	0.998	-0.308	1.5
LRRC4B	-11.93	12	-1.85	0.032	544	0.921	0.968	17511	0.998	-0.288	1.49
DLG5	-11.89	12	-1.84	0.0325	546	0.921	0.967	17509	0.998	-0.485	1.49
MRPL2	-11.89	12	-1.85	0.0324	545	0.921	0.968	17510	0.998	-0.698	1.49
RBCK1	-11.83	12	-1.84	0.0332	548	0.921	0.967	17507	0.997	-0.358	1.48
SF3A2	-11.83	12	-1.84	0.0332	547	0.921	0.967	17508	0.997	-1.265	1.48
AVPR2	-11.83	12	-1.84	0.0332	549	0.921	0.967	17506	0.997	-0.531	1.48
INPPL1	-11.81	12	-1.83	0.0334	550	0.921	0.967	17505	0.997	-0.446	1.48
MCM6	-11.81	12	-1.83	0.0334	551	0.921	0.967	17504	0.997	-1.367	1.48
ARFRP1	-11.76	12	-1.82	0.0341	554	0.921	0.966	17501	0.996	-0.646	1.47
XRN1	-11.72	12	-1.82	0.0345	567	0.921	0.965	17488	0.996	-0.792	1.46
ECHS1	-11.8	12	-1.83	0.0336	552	0.921	0.966	17503	0.997	-0.613	1.47
MVK	-11.26	11	-1.83	0.0339	553	0.921	0.966	17502	0.997	-0.525	1.47
IER2	-11.75	12	-1.82	0.0341	556	0.921	0.966	17499	0.996	-0.476	1.47
LRG1	-11.74	12	-1.82	0.0342	559	0.921	0.966	17496	0.996	-0.366	1.47
PLCE1	-11.75	12	-1.82	0.0341	555	0.921	0.966	17500	0.996	-0.39	1.47
ATP6V1D	-11.75	12	-1.82	0.0342	557	0.921	0.966	17498	0.996	-0.625	1.47
ZNF785	-11.74	12	-1.82	0.0342	558	0.921	0.966	17497	0.996	-0.461	1.47
MBLAC1	-11.72	12	-1.82	0.0345	566	0.921	0.965	17489	0.996	-0.515	1.46
MARK3	-11.73	12	-1.82	0.0344	563	0.921	0.966	17492	0.996	-0.442	1.46
CNNM3	-11.23	11	-1.82	0.0343	560	0.921	0.966	17495	0.996	-0.805	1.46
ATP6V1G1	-11.73	12	-1.82	0.0344	561	0.921	0.966	17494	0.996	-1.976	1.46
SORBS3	-11.71	12	-1.82	0.0346	568	0.921	0.965	17487	0.996	-0.266	1.46
GATA6	-10.7	10	-1.82	0.0344	562	0.921	0.966	17493	0.996	-0.44	1.46
ILK	-11.22	11	-1.82	0.0345	565	0.921	0.966	17490	0.996	-0.915	1.46
RQCD1	-11.72	12	-1.82	0.0344	564	0.921	0.966	17491	0.996	-0.803	1.46
UBE2A	-10.12	9	-1.81	0.0349	570	0.921	0.965	17485	0.996	-0.667	1.46
QRICH1	-11.7	12	-1.81	0.0348	569	0.921	0.965	17486	0.996	-0.538	1.46
PPM1H	-11.67	12	-1.81	0.0351	571	0.921	0.965	17484	0.996	-0.046	1.45
UFSP1	-11.65	12	-1.81	0.0353	572	0.921	0.965	17483	0.996	-0.426	1.45
IRF2	-11.65	12	-1.81	0.0353	573	0.921	0.965	17482	0.996	-0.328	1.45
TAF5L	-11.63	12	-1.8	0.0357	575	0.921	0.964	17480	0.996	-1.104	1.45
RAB18	-11.64	12	-1.81	0.0354	574	0.921	0.965	17481	0.996	-0.547	1.45
RBBP4	-11.6	12	-1.8	0.036	578	0.921	0.964	17477	0.996	-0.684	1.44
TRMT10C	-11.58	12	-1.8	0.0363	579	0.921	0.964	17476	0.996	-0.502	1.44
ATCAY	-11.6	12	-1.8	0.036	577	0.921	0.964	17478	0.996	-0.395	1.44
POLA2	-11.6	12	-1.8	0.0359	576	0.921	0.964	17479	0.996	-0.725	1.44
GAS2L2	-11.08	11	-1.79	0.0364	580	0.921	0.964	17475	0.996	-0.767	1.44
EHMT2	-11.57	12	-1.79	0.0364	581	0.921	0.964	17474	0.996	-0.205	1.44
ME3	-11.56	12	-1.79	0.0365	582	0.921	0.964	17473	0.996	-0.363	1.44
EMC3	-11.54	12	-1.79	0.0367	583	0.921	0.963	17472	0.995	-0.757	1.44
PEX10	-11.53	12	-1.79	0.0369	586	0.921	0.963	17469	0.995	-0.407	1.43
MRPS31	-11.54	12	-1.79	0.0368	584	0.921	0.963	17471	0.995	-0.414	1.43
HSPA4	-11.52	12	-1.79	0.037	587	0.921	0.963	17468	0.995	-0.162	1.43
PTPN23	-11.53	12	-1.79	0.0369	585	0.921	0.963	17470	0.995	-0.63	1.43
NDNL2	-11.48	12	-1.78	0.0375	588	0.921	0.962	17467	0.995	-0.726	1.43
ELMO2	-11.44	12	-1.77	0.038	593	0.921	0.962	17462	0.995	-0.886	1.42
CES3	-11.46	12	-1.78	0.0378	590	0.921	0.962	17465	0.995	-0.23	1.42
PPP2R3C	-11.47	12	-1.78	0.0377	589	0.921	0.962	17466	0.995	-0.495	1.42
SCGB3A1	-11.46	12	-1.78	0.0378	591	0.921	0.962	17464	0.995	-0.339	1.42
MRPS28	-11.44	12	-1.77	0.0381	594	0.921	0.962	17461	0.995	-0.288	1.42
TRAF7	-11.45	12	-1.78	0.0379	592	0.921	0.962	17463	0.995	-0.557	1.42
PLEKHO2	-11.41	12	-1.77	0.0384	597	0.921	0.962	17458	0.994	-0.464	1.42
CCDC47	-10.42	10	-1.77	0.0383	595	0.921	0.962	17460	0.994	-0.501	1.42
SETD6	-11.38	12	-1.76	0.0388	599	0.921	0.961	17456	0.994	-0.383	1.41
CHST3	-11.41	12	-1.77	0.0384	596	0.921	0.962	17459	0.994	-0.348	1.42
MARVELD1	-11.37	12	-1.76	0.039	601	0.921	0.961	17454	0.994	-0.241	1.41
ZNF517	-11.39	12	-1.77	0.0388	598	0.921	0.961	17457	0.994	-0.323	1.41
RNASEH2B	-11.38	12	-1.76	0.0388	600	0.921	0.961	17455	0.994	-0.44	1.41
S1PR2	-11.36	12	-1.76	0.0392	602	0.921	0.961	17453	0.994	-0.448	1.41
FANCM	-11.35	12	-1.76	0.0392	603	0.921	0.961	17452	0.994	-0.535	1.41
MON1A	-11.34	12	-1.76	0.0393	604	0.921	0.961	17451	0.994	-0.311	1.41
AKR7A2	-11.34	12	-1.76	0.0394	605	0.921	0.961	17450	0.994	-0.744	1.4
AIM1	-11.34	12	-1.76	0.0394	607	0.921	0.961	17448	0.994	-0.603	1.4
ZNF217	-11.34	12	-1.76	0.0394	606	0.921	0.961	17449	0.994	-0.574	1.4
FAM53A	-11.32	12	-1.75	0.0396	609	0.921	0.96	17446	0.994	-0.474	1.4
NARS2	-11.33	12	-1.76	0.0396	608	0.921	0.96	17447	0.994	-0.677	1.4
RARA	-11.3	12	-1.75	0.04	612	0.921	0.96	17443	0.994	-0.476	1.4
KIF4A	-11.31	12	-1.75	0.0398	610	0.921	0.96	17445	0.994	-0.446	1.4
RPAP1	-11.31	12	-1.75	0.0399	611	0.921	0.96	17444	0.994	-1.133	1.4
MRPS18C	-11.23	12	-1.74	0.0409	617	0.921	0.959	17438	0.993	-0.684	1.39
MTCH1	-11.27	12	-1.75	0.0404	613	0.921	0.96	17442	0.993	-0.499	1.39
CYBA	-11.26	12	-1.75	0.0405	614	0.921	0.96	17441	0.993	-0.368	1.39
PFDN5	-11.24	12	-1.74	0.0408	616	0.921	0.959	17439	0.993	-0.819	1.39
TAF6	-11.25	12	-1.74	0.0406	615	0.921	0.959	17440	0.993	-1.003	1.39
ANGPTL6	-11.22	12	-1.74	0.0411	618	0.921	0.959	17437	0.993	-0.416	1.39
CCDC22	-11.19	12	-1.73	0.0415	620	0.921	0.959	17435	0.993	-0.353	1.38
CNIH2	-11.19	12	-1.73	0.0415	621	0.921	0.959	17434	0.993	-0.384	1.38
BHLHA9	-11.19	12	-1.73	0.0414	619	0.921	0.959	17436	0.993	-0.388	1.38
C14orf80	-11.16	12	-1.73	0.0419	623	0.921	0.958	17432	0.992	-0.375	1.38
ZNF696	-11.15	12	-1.73	0.0421	624	0.921	0.958	17431	0.992	-0.438	1.38
UBALD2	-11.14	12	-1.73	0.0422	625	0.921	0.958	17430	0.992	-0.371	1.37
CTNNBIP1	-11.18	12	-1.73	0.0416	622	0.921	0.958	17433	0.993	-0.517	1.38
KLHL26	-11.12	12	-1.72	0.0425	628	0.921	0.958	17427	0.992	-0.235	1.37
POP7	-11.13	12	-1.72	0.0423	626	0.921	0.958	17429	0.992	-1.16	1.37
SSTR3	-11.12	12	-1.72	0.0424	627	0.921	0.958	17428	0.992	-0.423	1.37
KIAA1239	-10.13	10	-1.72	0.0428	630	0.921	0.957	17425	0.992	-0.277	1.37
TSSK6	-11.1	12	-1.72	0.0427	629	0.921	0.957	17426	0.992	-0.437	1.37
MED9	-11.09	12	-1.72	0.0429	632	0.921	0.957	17423	0.992	-0.728	1.37
TM2D3	-11.09	12	-1.72	0.0429	631	0.921	0.957	17424	0.992	-0.584	1.37
AURKAIP1	-11.08	12	-1.72	0.043	633	0.921	0.957	17422	0.992	-0.479	1.37
ZC3H4	-11	12	-1.7	0.0442	645	0.921	0.956	17410	0.991	-0.575	1.35
RRM1	-11.06	12	-1.71	0.0434	636	0.921	0.957	17419	0.992	-1.586	1.36
HGS	-11.07	12	-1.71	0.0433	635	0.921	0.957	17420	0.992	-0.621	1.36
NUMBL	-11.04	12	-1.71	0.0437	640	0.921	0.956	17415	0.991	-0.314	1.36
SGSH	-11.08	12	-1.72	0.0431	634	0.921	0.957	17421	0.992	-0.697	1.37
NCAN	-11.03	12	-1.71	0.0438	641	0.921	0.956	17414	0.991	-0.82	1.36
SLC39A5	-11.04	12	-1.71	0.0436	638	0.921	0.956	17417	0.991	-0.581	1.36
KIFC1	-11.06	12	-1.71	0.0434	637	0.921	0.957	17418	0.992	-0.542	1.36
POLR2C	-11.04	12	-1.71	0.0437	639	0.921	0.956	17416	0.991	-1.276	1.36
SFTPC	-11.02	12	-1.71	0.0439	644	0.921	0.956	17411	0.991	-0.48	1.36
TM2D2	-11.03	12	-1.71	0.0439	642	0.921	0.956	17413	0.991	-0.582	1.36
ASCL4	-11.03	12	-1.71	0.0439	643	0.921	0.956	17412	0.991	-0.532	1.36
MMS22L	-10.98	12	-1.7	0.0446	646	0.921	0.955	17409	0.991	-0.831	1.35
TMEM164	-10.98	12	-1.7	0.0446	647	0.921	0.955	17408	0.991	-0.248	1.35
STK35	-10.93	12	-1.69	0.0452	650	0.921	0.955	17405	0.99	-0.359	1.34
UBE2C	-10.94	12	-1.69	0.0452	648	0.921	0.955	17407	0.99	-0.555	1.34
CACNA2D2	-10.94	12	-1.69	0.0452	649	0.921	0.955	17406	0.99	-0.436	1.34
MRFAP1	-10.92	12	-1.69	0.0454	653	0.921	0.955	17402	0.99	-0.26	1.34
KLHDC8A	-10.91	12	-1.69	0.0456	655	0.921	0.954	17400	0.99	-0.384	1.34
C16orf13	-10.93	12	-1.69	0.0453	651	0.921	0.955	17404	0.99	-0.408	1.34
IWS1	-9.45	9	-1.69	0.0456	656	0.921	0.954	17399	0.99	-0.351	1.34
NR2F2	-10.92	12	-1.69	0.0454	652	0.921	0.955	17403	0.99	-0.418	1.34
CS	-10.9	12	-1.69	0.0458	657	0.921	0.954	17398	0.99	-0.281	1.34
TP53	-10.92	12	-1.69	0.0455	654	0.921	0.955	17401	0.99	-0.407	1.34
MCPH1	-10.89	12	-1.69	0.0459	659	0.921	0.954	17396	0.99	-0.736	1.34
SH3GL1	-10.89	12	-1.69	0.0459	658	0.921	0.954	17397	0.99	-0.402	1.34
RC3H1	-10.86	12	-1.68	0.0463	660	0.921	0.954	17395	0.99	-0.471	1.33
MON1B	-10.83	12	-1.68	0.0468	662	0.921	0.953	17393	0.989	-0.233	1.33
C16orf74	-10.83	12	-1.68	0.0468	661	0.921	0.953	17394	0.989	-0.317	1.33
PCDH1	-10.83	12	-1.68	0.0469	663	0.921	0.953	17392	0.989	-0.35	1.33
SIGLEC15	-10.82	12	-1.68	0.047	664	0.921	0.953	17391	0.989	-0.205	1.33
MRPL15	-10.82	12	-1.67	0.047	665	0.921	0.953	17390	0.989	-0.468	1.33
TRIP10	-10.79	12	-1.67	0.0474	666	0.921	0.953	17389	0.989	-0.421	1.32
RAC1	-10.78	12	-1.67	0.0477	668	0.921	0.952	17387	0.989	-1.141	1.32
NELFB	-10.79	12	-1.67	0.0475	667	0.921	0.952	17388	0.989	-0.825	1.32
NPRL2	-10.77	12	-1.67	0.0477	669	0.921	0.952	17386	0.989	-0.229	1.32
XYLT2	-10.76	12	-1.67	0.0479	670	0.921	0.952	17385	0.989	-0.281	1.32
DRG2	-10.74	12	-1.66	0.0483	672	0.921	0.952	17383	0.988	-0.395	1.32
MRPS15	-10.76	12	-1.66	0.048	671	0.921	0.952	17384	0.989	-0.381	1.32
ORC2	-10.74	12	-1.66	0.0483	673	0.921	0.952	17382	0.988	-1.044	1.32
MRPL35	-10.71	12	-1.66	0.0487	674	0.921	0.951	17381	0.988	-0.44	1.31
UCK2	-10.7	12	-1.66	0.0488	677	0.921	0.951	17378	0.988	-0.311	1.31
UGCG	-10.68	12	-1.65	0.0493	681	0.921	0.951	17374	0.988	-0.604	1.31
HOXD12	-10.71	12	-1.66	0.0488	675	0.921	0.951	17380	0.988	-0.424	1.31
CCDC97	-10.7	12	-1.66	0.0488	676	0.921	0.951	17379	0.988	-0.502	1.31
MUS81	-10.7	12	-1.66	0.0489	678	0.921	0.951	17377	0.988	-0.281	1.31
AHCY	-10.7	12	-1.66	0.0489	679	0.921	0.951	17376	0.988	-0.405	1.31
ASCC3	-10.7	12	-1.65	0.049	680	0.921	0.951	17375	0.988	-0.485	1.31
MRPS6	-10.67	12	-1.65	0.0494	685	0.921	0.951	17370	0.988	-0.358	1.31
KPTN	-10.68	12	-1.65	0.0493	682	0.921	0.951	17373	0.988	-0.303	1.31
CYLD	-10.67	12	-1.65	0.0493	683	0.921	0.951	17372	0.988	-0.659	1.31
IAH1	-10.67	12	-1.65	0.0494	684	0.921	0.951	17371	0.988	-0.196	1.31
ENKD1	-10.65	12	-1.65	0.0497	687	0.921	0.95	17368	0.988	-0.133	1.3
PARD6A	-10.66	12	-1.65	0.0496	686	0.921	0.95	17369	0.988	-0.39	1.3
NKX1-1	-10.64	12	-1.65	0.0499	688	0.921	0.95	17367	0.988	-0.477	1.3
ASUN	-10.62	12	-1.64	0.0503	692	0.921	0.95	17363	0.988	-0.778	1.3
EMC2	-10.61	12	-1.64	0.0503	694	0.921	0.95	17361	0.988	-0.49	1.3
MRPL19	-10.62	12	-1.64	0.0502	691	0.921	0.95	17364	0.988	-0.527	1.3
FTO	-10.62	12	-1.64	0.0503	693	0.921	0.95	17362	0.988	-0.833	1.3
WWTR1	-10.63	12	-1.64	0.05	689	0.921	0.95	17366	0.988	-0.478	1.3
METAP1	-10.6	12	-1.64	0.0505	697	0.921	0.949	17358	0.987	-0.687	1.3
UBC	-10.6	12	-1.64	0.0505	696	0.921	0.949	17359	0.987	-0.595	1.3
FOXF2	-10.62	12	-1.64	0.0502	690	0.921	0.95	17365	0.988	-0.414	1.3
C1orf65	-10.61	12	-1.64	0.0505	695	0.921	0.95	17360	0.988	-0.357	1.3
IER3IP1	-10.58	12	-1.64	0.051	698	0.921	0.949	17357	0.987	-0.475	1.29
ABLIM2	-10.57	12	-1.64	0.051	699	0.921	0.949	17356	0.987	-0.363	1.29
C2CD4D	-10.55	12	-1.63	0.0514	701	0.921	0.949	17354	0.987	-0.572	1.29
F2RL2	-10.56	12	-1.63	0.0512	700	0.921	0.949	17355	0.987	-0.267	1.29
DENR	-10.54	12	-1.63	0.0516	703	0.921	0.948	17352	0.987	-0.253	1.29
FOXC1	-10.53	12	-1.63	0.0518	704	0.921	0.948	17351	0.987	-0.363	1.29
GID8	-10.54	12	-1.63	0.0515	702	0.921	0.949	17353	0.987	-0.491	1.29
CREB3L2	-10.51	12	-1.62	0.0521	706	0.921	0.948	17349	0.986	-0.469	1.28
MAP4K2	-10.52	12	-1.63	0.052	705	0.921	0.948	17350	0.987	-0.496	1.28
FBXL8	-10.5	12	-1.62	0.0522	707	0.921	0.948	17348	0.986	-0.433	1.28
VPS72	-10.49	12	-1.62	0.0525	712	0.921	0.948	17343	0.986	-0.688	1.28
ANKRD11	-10.49	12	-1.62	0.0524	711	0.921	0.948	17344	0.986	-0.345	1.28
SCO2	-10.48	12	-1.62	0.0526	713	0.921	0.947	17342	0.986	-0.309	1.28
EPN1	-10.49	12	-1.62	0.0524	710	0.921	0.948	17345	0.986	-0.277	1.28
DDX42	-10.5	12	-1.62	0.0523	709	0.921	0.948	17346	0.986	-0.606	1.28
TRIM37	-10.47	12	-1.62	0.0527	714	0.921	0.947	17341	0.986	-0.652	1.28
RAE1	-10.5	12	-1.62	0.0522	708	0.921	0.948	17347	0.986	-0.378	1.28
RNF8	-10.47	12	-1.62	0.0527	715	0.921	0.947	17340	0.986	-0.278	1.28
SOCS1	-10.47	12	-1.62	0.0528	717	0.921	0.947	17338	0.986	-0.278	1.28
RTN4R	-10.47	12	-1.62	0.0528	716	0.921	0.947	17339	0.986	-0.38	1.28
HYAL2	-10.47	12	-1.62	0.0528	718	0.921	0.947	17337	0.986	-0.267	1.28
MRPL39	-10.43	12	-1.61	0.0534	722	0.921	0.947	17333	0.986	-0.453	1.27
LGALS1	-10.41	12	-1.61	0.0538	725	0.921	0.946	17330	0.986	-0.419	1.27
HNRNPA3	-10.45	12	-1.62	0.053	719	0.921	0.947	17336	0.986	-0.424	1.28
TBC1D20	-10.44	12	-1.61	0.0533	721	0.921	0.947	17334	0.986	-0.534	1.27
CHMP5	-10.44	12	-1.61	0.0532	720	0.921	0.947	17335	0.986	-0.688	1.27
SUPT6H	-10.38	12	-1.61	0.0542	728	0.921	0.946	17327	0.985	-0.731	1.27
MLYCD	-10.41	12	-1.61	0.0538	724	0.921	0.946	17331	0.986	-0.412	1.27
NACC2	-10.39	12	-1.61	0.0541	727	0.921	0.946	17328	0.985	-0.308	1.27
JMJD8	-10.41	12	-1.61	0.0538	726	0.921	0.946	17329	0.986	-0.282	1.27
TCEB3	-10.41	12	-1.61	0.0538	723	0.921	0.946	17332	0.986	-0.576	1.27
IRX2	-10.38	12	-1.6	0.0544	732	0.921	0.946	17323	0.985	-0.407	1.26
SMG9	-10.38	12	-1.6	0.0543	729	0.921	0.946	17326	0.985	-0.261	1.27
RAD50	-9.94	11	-1.6	0.0543	731	0.921	0.946	17324	0.985	-0.468	1.27
SP3	-10.33	12	-1.6	0.0552	741	0.921	0.945	17314	0.985	-0.32	1.26
RAD51	-10.33	12	-1.6	0.0552	742	0.921	0.945	17313	0.985	-0.882	1.26
CTDNEP1	-10.34	12	-1.6	0.0551	736	0.921	0.945	17319	0.985	-0.968	1.26
NANOS2	-10.36	12	-1.6	0.0547	733	0.921	0.945	17322	0.985	-0.258	1.26
MED25	-10.35	12	-1.6	0.0549	734	0.921	0.945	17321	0.985	-0.312	1.26
FKRP	-10.33	12	-1.6	0.0551	737	0.921	0.945	17318	0.985	-0.329	1.26
ATRIP	-10.33	12	-1.6	0.0552	739	0.921	0.945	17316	0.985	-0.591	1.26
PPP2R5E	-10.35	12	-1.6	0.0549	735	0.921	0.945	17320	0.985	-0.529	1.26
ARMC5	-10.38	12	-1.6	0.0543	730	0.921	0.946	17325	0.985	-1.224	1.27
C1orf74	-10.31	12	-1.59	0.0555	744	0.921	0.945	17311	0.985	-0.355	1.26
LRFN4	-10.33	12	-1.6	0.0552	740	0.921	0.945	17315	0.985	-0.419	1.26
ORC3	-10.31	12	-1.59	0.0556	746	0.921	0.944	17309	0.985	-0.699	1.25
ZNF784	-10.31	12	-1.59	0.0555	743	0.921	0.945	17312	0.985	-0.335	1.26
PNMAL2	-10.33	12	-1.6	0.0551	738	0.921	0.945	17317	0.985	-0.41	1.26
ACTR8	-10.31	12	-1.59	0.0556	745	0.921	0.944	17310	0.985	-0.413	1.25
SEZ6	-10.28	12	-1.59	0.056	747	0.921	0.944	17308	0.985	-0.383	1.25
FBXW9	-10.28	12	-1.59	0.056	748	0.921	0.944	17307	0.985	-0.299	1.25
MCRS1	-10.27	12	-1.59	0.0562	751	0.921	0.944	17304	0.985	-0.745	1.25
GSX2	-10.28	12	-1.59	0.0561	750	0.921	0.944	17305	0.985	-0.39	1.25
CDK2	-10.26	12	-1.58	0.0565	756	0.921	0.943	17299	0.985	-0.808	1.25
YAP1	-10.26	12	-1.59	0.0564	753	0.921	0.944	17302	0.985	-0.515	1.25
SF1	-10.26	12	-1.59	0.0564	754	0.921	0.944	17301	0.985	-0.362	1.25
PRR25	-8.9	9	-1.59	0.0561	749	0.921	0.944	17306	0.985	-0.421	1.25
TBC1D10A	-10.27	12	-1.59	0.0563	752	0.921	0.944	17303	0.985	-0.314	1.25
SMPD3	-10.26	12	-1.58	0.0565	755	0.921	0.943	17300	0.985	-0.512	1.25
TPP2	-10.24	12	-1.58	0.0568	757	0.921	0.943	17298	0.984	-0.498	1.25
OXT	-10.23	12	-1.58	0.057	758	0.921	0.943	17297	0.984	-0.242	1.24
TFAM	-10.22	12	-1.58	0.0573	759	0.921	0.943	17296	0.984	-0.28	1.24
PRSS57	-10.19	12	-1.57	0.0577	760	0.921	0.942	17295	0.984	-0.309	1.24
RIF1	-10.18	12	-1.57	0.0579	761	0.921	0.942	17294	0.983	-0.574	1.24
ELL3	-10.15	12	-1.57	0.0585	767	0.921	0.941	17288	0.983	-0.301	1.23
FOSL1	-10.18	12	-1.57	0.058	762	0.921	0.942	17293	0.983	-0.709	1.24
KRT1	-10.16	12	-1.57	0.0584	765	0.921	0.942	17290	0.983	-0.327	1.23
UBAP2L	-10.17	12	-1.57	0.0582	763	0.921	0.942	17292	0.983	-0.519	1.24
CBLL1	-10.16	12	-1.57	0.0583	764	0.921	0.942	17291	0.983	-0.207	1.23
C19orf43	-10.13	12	-1.56	0.0588	770	0.921	0.941	17285	0.983	-0.532	1.23
H2AFZ	-10.15	12	-1.57	0.0585	766	0.921	0.942	17289	0.983	-0.228	1.23
TXNDC15	-10.14	12	-1.57	0.0587	768	0.921	0.941	17287	0.983	-0.314	1.23
SSTR4	-10.13	12	-1.56	0.0589	771	0.921	0.941	17284	0.983	-0.3	1.23
CEBPA	-10.14	12	-1.57	0.0587	769	0.921	0.941	17286	0.983	-0.336	1.23
FBXO11	-10.12	12	-1.56	0.0591	772	0.921	0.941	17283	0.983	-0.602	1.23
C11orf94	-10.1	12	-1.56	0.0595	774	0.921	0.941	17281	0.983	-0.229	1.23
FAM168A	-10.1	12	-1.56	0.0595	773	0.921	0.941	17282	0.983	-0.28	1.23
SLC35C2	-10.09	12	-1.56	0.0596	775	0.921	0.94	17280	0.983	-0.541	1.22
BAP1	-10.07	12	-1.55	0.0601	776	0.921	0.94	17279	0.982	-0.459	1.22
SHFM1	-10.06	12	-1.55	0.0602	777	0.921	0.94	17278	0.982	-0.548	1.22
KCNJ11	-10.06	12	-1.55	0.0602	778	0.921	0.94	17277	0.982	-0.427	1.22
ZNF589	-10.05	12	-1.55	0.0604	779	0.921	0.94	17276	0.982	-0.168	1.22
CEBPB	-10.02	12	-1.55	0.061	782	0.921	0.939	17273	0.981	-0.36	1.21
OXA1L	-10.03	12	-1.55	0.0607	780	0.921	0.939	17275	0.982	-0.723	1.22
MCM8	-10.01	12	-1.55	0.0611	784	0.921	0.939	17271	0.981	-0.515	1.21
TMEM26	-10.02	12	-1.55	0.061	781	0.921	0.939	17274	0.981	-0.123	1.21
KCNB1	-10	12	-1.54	0.0613	785	0.921	0.939	17270	0.981	-0.366	1.21
PODXL2	-9.56	11	-1.54	0.0616	788	0.921	0.938	17267	0.981	-0.713	1.21
PRPF38B	-10.01	12	-1.55	0.0611	783	0.921	0.939	17272	0.981	-0.6	1.21
BTNL9	-9.98	12	-1.54	0.0616	789	0.921	0.938	17266	0.981	-0.076	1.21
GTF3C1	-9.99	12	-1.54	0.0615	787	0.921	0.939	17268	0.981	-0.905	1.21
GLS	-9.98	12	-1.54	0.0617	790	0.921	0.938	17265	0.981	-0.411	1.21
NSMF	-8.66	9	-1.54	0.0614	786	0.921	0.939	17269	0.981	-0.343	1.21
B4GALT1	-9.97	12	-1.54	0.062	791	0.921	0.938	17264	0.981	-0.17	1.21
CANT1	-9.96	12	-1.54	0.062	792	0.921	0.938	17263	0.981	-0.089	1.21
PSMC3IP	-9.96	12	-1.54	0.0621	793	0.921	0.938	17262	0.981	-0.558	1.21
CNOT6L	-9.96	12	-1.54	0.0622	794	0.921	0.938	17261	0.981	-0.322	1.21
RADIL	-9.93	12	-1.53	0.0628	796	0.921	0.937	17259	0.98	-0.166	1.2
SPTB	-9.94	12	-1.53	0.0626	795	0.921	0.937	17260	0.981	-0.372	1.2
MAMSTR	-9.92	12	-1.53	0.0629	797	0.921	0.937	17258	0.98	-0.54	1.2
TAMM41	-9.91	12	-1.53	0.063	798	0.921	0.937	17257	0.98	-0.526	1.2
HGFAC	-9.91	12	-1.53	0.063	799	0.921	0.937	17256	0.98	-0.189	1.2
CTR9	-9.89	12	-1.53	0.0635	802	0.921	0.937	17253	0.98	-0.557	1.2
HSD17B10	-9.9	12	-1.53	0.0632	800	0.921	0.937	17255	0.98	-0.406	1.2
SNUPN	-9.86	12	-1.52	0.0642	807	0.921	0.936	17248	0.98	-0.643	1.19
MED29	-9.9	12	-1.53	0.0634	801	0.921	0.937	17254	0.98	-0.481	1.2
NCLN	-9.88	12	-1.52	0.0637	803	0.921	0.936	17252	0.98	-0.219	1.2
CAMKK1	-9.86	12	-1.52	0.0641	805	0.921	0.936	17250	0.98	-0.334	1.19
SNX22	-9.85	12	-1.52	0.0643	808	0.921	0.936	17247	0.98	-0.315	1.19
BIRC2	-9.87	12	-1.52	0.064	804	0.921	0.936	17251	0.98	-0.443	1.19
ATP6V0D1	-9.86	12	-1.52	0.0642	806	0.921	0.936	17249	0.98	-0.69	1.19
FAM46A	-9.85	12	-1.52	0.0644	809	0.921	0.936	17246	0.979	-0.363	1.19
FUS	-9.81	12	-1.51	0.0652	814	0.921	0.935	17241	0.979	-0.407	1.19
DNAJC17	-9.81	12	-1.51	0.0651	812	0.921	0.935	17243	0.979	-0.643	1.19
GPT2	-9.84	12	-1.52	0.0646	810	0.921	0.935	17245	0.979	-0.372	1.19
UBA1	-9.81	12	-1.51	0.0652	813	0.921	0.935	17242	0.979	-1.008	1.19
MRC2	-9.83	12	-1.52	0.0647	811	0.921	0.935	17244	0.979	-0.422	1.19
MRPL12	-9.8	12	-1.51	0.0652	815	0.921	0.935	17240	0.979	-0.464	1.19
C8orf58	-9.8	12	-1.51	0.0653	816	0.921	0.935	17239	0.979	-0.36	1.19
VPS29	-9.79	12	-1.51	0.0654	817	0.921	0.935	17238	0.979	-0.846	1.18
POLR2A	-9.79	12	-1.51	0.0656	818	0.921	0.934	17237	0.979	-0.446	1.18
TMEM183A	-9.78	12	-1.51	0.0658	819	0.921	0.934	17236	0.979	-0.41	1.18
STK40	-9.77	12	-1.51	0.0658	821	0.921	0.934	17234	0.979	-0.475	1.18
PGLS	-8.46	9	-1.51	0.066	822	0.921	0.934	17233	0.979	-0.3	1.18
TMEM52	-9.78	12	-1.51	0.0658	820	0.921	0.934	17235	0.979	-0.361	1.18
GABARAP	-9.76	12	-1.51	0.0661	826	0.921	0.934	17229	0.979	-0.344	1.18
EGR3	-9.76	12	-1.51	0.0661	827	0.921	0.934	17228	0.979	-0.282	1.18
USP24	-9.77	12	-1.51	0.066	824	0.921	0.934	17231	0.979	-0.263	1.18
BCL6B	-9.75	12	-1.5	0.0662	828	0.921	0.934	17227	0.979	-0.329	1.18
DOC2B	-9.77	12	-1.51	0.066	823	0.921	0.934	17232	0.979	-0.387	1.18
MAD2L1	-9.76	12	-1.51	0.0661	825	0.921	0.934	17230	0.979	-1.376	1.18
TEX22	-9.75	12	-1.5	0.0664	829	0.921	0.934	17226	0.978	-0.244	1.18
PIEZO1	-9.74	12	-1.5	0.0665	831	0.921	0.933	17224	0.978	-0.392	1.18
ISYNA1	-9.74	12	-1.5	0.0665	830	0.921	0.933	17225	0.978	-0.411	1.18
CCDC102A	-9.72	12	-1.5	0.067	832	0.921	0.933	17223	0.978	-0.419	1.17
CASC5	-9.71	12	-1.5	0.0671	834	0.921	0.933	17221	0.978	-0.33	1.17
AIF1	-9.72	12	-1.5	0.067	833	0.921	0.933	17222	0.978	-0.264	1.17
HCN2	-9.7	12	-1.5	0.0674	839	0.921	0.933	17216	0.978	-0.365	1.17
LIMK2	-9.71	12	-1.5	0.0671	835	0.921	0.933	17220	0.978	-0.544	1.17
FBRS	-9.7	12	-1.5	0.0674	840	0.921	0.933	17215	0.978	-0.433	1.17
E2F6	-8.4	9	-1.5	0.0674	838	0.921	0.933	17217	0.978	-0.211	1.17
SLC18A3	-9.71	12	-1.5	0.0672	836	0.921	0.933	17219	0.978	-0.154	1.17
AXIN1	-9.7	12	-1.5	0.0673	837	0.921	0.933	17218	0.978	-0.447	1.17
PLEKHG5	-9.68	12	-1.49	0.0679	841	0.921	0.932	17214	0.978	-0.34	1.17
RNPS1	-9.66	12	-1.49	0.0683	842	0.921	0.932	17213	0.977	-0.75	1.17
GNB2L1	-9.65	12	-1.49	0.0683	844	0.921	0.932	17211	0.977	-1.288	1.17
TONSL	-9.65	12	-1.49	0.0683	843	0.921	0.932	17212	0.977	-0.665	1.17
NSUN4	-9.65	12	-1.49	0.0684	845	0.921	0.932	17210	0.977	-0.708	1.16
UROD	-9.65	12	-1.49	0.0684	846	0.921	0.932	17209	0.977	-0.657	1.16
SNX27	-9.64	12	-1.49	0.0687	849	0.921	0.931	17206	0.977	-0.322	1.16
C17orf107	-9.63	12	-1.48	0.0689	852	0.921	0.931	17203	0.977	-0.215	1.16
FBXO40	-9.64	12	-1.49	0.0687	848	0.921	0.931	17207	0.977	-0.143	1.16
ATP1A1	-9.63	12	-1.48	0.0689	853	0.921	0.931	17202	0.977	-0.481	1.16
MRPL21	-9.63	12	-1.48	0.0688	851	0.921	0.931	17204	0.977	-0.42	1.16
GPS2	-9.63	12	-1.48	0.0688	850	0.921	0.931	17205	0.977	-0.451	1.16
NEU1	-9.61	12	-1.48	0.0692	856	0.921	0.931	17199	0.977	-0.327	1.16
PEX14	-9.62	12	-1.48	0.0691	855	0.921	0.931	17200	0.977	-0.401	1.16
ZYX	-9.62	12	-1.48	0.069	854	0.921	0.931	17201	0.977	-0.436	1.16
PAWR	-9.6	12	-1.48	0.0695	857	0.921	0.931	17198	0.977	-0.259	1.16
FAM167A	-9.6	12	-1.48	0.0695	858	0.921	0.93	17197	0.977	-0.268	1.16
CHRNE	-9.6	12	-1.48	0.0696	859	0.921	0.93	17196	0.977	-0.569	1.16
MAU2	-9.65	12	-1.49	0.0684	847	0.921	0.932	17208	0.977	-0.472	1.16
UNCX	-9.57	12	-1.48	0.07	861	0.921	0.93	17194	0.976	-0.407	1.15
FBXL2	-9.58	12	-1.48	0.07	860	0.921	0.93	17195	0.976	-0.284	1.15
GADD45B	-9.57	12	-1.47	0.0702	862	0.921	0.93	17193	0.976	-0.549	1.15
TFB2M	-9.47	12	-1.46	0.0723	881	0.921	0.928	17174	0.975	-0.299	1.14
CDC20B	-9.55	12	-1.47	0.0705	864	0.921	0.929	17191	0.976	-0.27	1.15
MED28	-9.56	12	-1.47	0.0703	863	0.921	0.93	17192	0.976	-0.372	1.15
MOV10	-9.54	12	-1.47	0.0709	866	0.921	0.929	17189	0.976	-0.327	1.15
ZNF296	-9.54	12	-1.47	0.0708	865	0.921	0.929	17190	0.976	-0.37	1.15
BRD1	-9.53	12	-1.47	0.071	867	0.921	0.929	17188	0.976	-0.28	1.15
CTRB2	-9.52	12	-1.47	0.0713	870	0.921	0.929	17185	0.976	-0.333	1.15
SLC35B2	-9.52	12	-1.47	0.0712	868	0.921	0.929	17187	0.976	-0.39	1.15
PPDPF	-9.51	12	-1.46	0.0715	871	0.921	0.928	17184	0.976	-0.369	1.15
SUCO	-9.52	12	-1.47	0.0713	869	0.921	0.929	17186	0.976	-0.262	1.15
EXOC3L2	-9.5	12	-1.46	0.0717	873	0.921	0.928	17182	0.975	-0.297	1.14
SMC6	-9.49	12	-1.46	0.0719	876	0.921	0.928	17179	0.975	-1.212	1.14
DOK3	-9.49	12	-1.46	0.0718	874	0.921	0.928	17181	0.975	-0.292	1.14
RPL19	-9.48	12	-1.46	0.072	877	0.921	0.928	17178	0.975	-0.785	1.14
TRMU	-9.49	12	-1.46	0.0718	875	0.921	0.928	17180	0.975	-0.558	1.14
MRPL13	-9.46	12	-1.46	0.0725	884	0.921	0.928	17171	0.975	-0.578	1.14
TMEM115	-9.5	12	-1.46	0.0717	872	0.921	0.928	17183	0.975	-0.2	1.14
OPA1	-9.47	12	-1.46	0.0723	882	0.921	0.928	17173	0.975	-0.523	1.14
ZMYND10	-9.48	12	-1.46	0.0721	878	0.921	0.928	17177	0.975	-0.223	1.14
GAS2L1	-9.47	12	-1.46	0.0723	880	0.921	0.928	17175	0.975	-0.166	1.14
C20orf24	-9.47	12	-1.46	0.0722	879	0.921	0.928	17176	0.975	-0.314	1.14
METTL7A	-9.44	12	-1.45	0.0729	886	0.921	0.927	17169	0.975	-0.256	1.14
TBCD	-9.46	12	-1.46	0.0725	883	0.921	0.928	17172	0.975	-0.657	1.14
USP39	-9.44	12	-1.45	0.0729	887	0.921	0.927	17168	0.975	-0.662	1.14
PRND	-9.45	12	-1.46	0.0728	885	0.921	0.927	17170	0.975	-0.25	1.14
SMC1A	-9.43	12	-1.45	0.0731	889	0.921	0.927	17166	0.975	-0.699	1.14
NAA25	-9.43	12	-1.45	0.0732	890	0.921	0.927	17165	0.975	-1.598	1.14
SAMD1	-9.43	12	-1.45	0.0731	888	0.921	0.927	17167	0.975	-0.18	1.14
C17orf85	-9.41	12	-1.45	0.0736	892	0.921	0.926	17163	0.975	-0.155	1.13
JPH3	-9.43	12	-1.45	0.0733	891	0.921	0.927	17164	0.975	-0.071	1.13
YTHDF2	-9.39	12	-1.45	0.0741	898	0.921	0.926	17157	0.974	-0.317	1.13
ZNF526	-9.39	12	-1.45	0.074	897	0.921	0.926	17158	0.974	-0.423	1.13
PIGN	-9.41	12	-1.45	0.0737	894	0.921	0.926	17161	0.975	-0.25	1.13
SLCO3A1	-9.39	12	-1.45	0.0741	899	0.921	0.926	17156	0.974	-0.204	1.13
NR2C2	-9.4	12	-1.45	0.0739	895	0.921	0.926	17160	0.974	-0.657	1.13
HAGHL	-9.38	12	-1.44	0.0744	902	0.921	0.926	17153	0.974	-0.065	1.13
BEND3	-9.41	12	-1.45	0.0736	893	0.921	0.926	17162	0.975	-0.258	1.13
CDK5R2	-9.37	12	-1.44	0.0746	906	0.921	0.925	17149	0.974	-0.249	1.13
RAB11FIP3	-9.4	12	-1.45	0.0739	896	0.921	0.926	17159	0.974	-0.474	1.13
ZNF646	-9.39	12	-1.45	0.0741	900	0.921	0.926	17155	0.974	-0.152	1.13
IRX3	-9.37	12	-1.44	0.0745	905	0.921	0.925	17150	0.974	-0.299	1.13
MSL3	-9.37	12	-1.44	0.0745	903	0.921	0.926	17152	0.974	-0.524	1.13
TAF4	-9.39	12	-1.45	0.0742	901	0.921	0.926	17154	0.974	-0.046	1.13
DYNC1LI1	-9.33	12	-1.44	0.0755	914	0.921	0.924	17141	0.974	-0.479	1.12
SLC38A10	-9.35	12	-1.44	0.0749	908	0.921	0.925	17147	0.974	-0.243	1.13
POLG2	-9.37	12	-1.44	0.0745	904	0.921	0.925	17151	0.974	-0.655	1.13
LRRN4CL	-9.36	12	-1.44	0.0748	907	0.921	0.925	17148	0.974	-0.452	1.13
MTPAP	-9.34	12	-1.44	0.0751	910	0.921	0.925	17145	0.974	-0.366	1.12
ZNF503	-9.35	12	-1.44	0.075	909	0.921	0.925	17146	0.974	-0.334	1.12
NEU4	-9.34	12	-1.44	0.0752	911	0.921	0.925	17144	0.974	-0.315	1.12
RBM4	-9.34	12	-1.44	0.0752	912	0.921	0.925	17143	0.974	-0.579	1.12
LCE3A	-9.32	12	-1.44	0.0756	916	0.921	0.924	17139	0.974	-0.289	1.12
PDCL	-9.31	12	-1.43	0.0758	917	0.921	0.924	17138	0.974	-0.955	1.12
C19orf68	-9.31	12	-1.43	0.0758	918	0.921	0.924	17137	0.974	-0.216	1.12
MAP2K3	-9.33	12	-1.44	0.0755	913	0.921	0.925	17142	0.974	-0.355	1.12
NEUROG3	-9.32	12	-1.44	0.0755	915	0.921	0.924	17140	0.974	-0.23	1.12
CD2BP2	-8.06	9	-1.43	0.0759	919	0.921	0.924	17136	0.974	-0.071	1.12
USPL1	-9.3	12	-1.43	0.0761	920	0.921	0.924	17135	0.973	-0.74	1.12
MRPL45	-9.28	12	-1.43	0.0766	925	0.921	0.923	17130	0.973	-0.86	1.12
RETNLB	-9.28	12	-1.43	0.0765	924	0.921	0.923	17131	0.973	-0.134	1.12
ZNF689	-9.3	12	-1.43	0.0762	921	0.921	0.924	17134	0.973	-0.284	1.12
RTN4RL2	-9.29	12	-1.43	0.0764	922	0.921	0.924	17133	0.973	-0.386	1.12
PRRC2C	-9.26	12	-1.43	0.0769	927	0.921	0.923	17128	0.973	-0.098	1.11
PYDC1	-9.27	12	-1.43	0.0768	926	0.921	0.923	17129	0.973	-0.486	1.11
ZSWIM7	-9.28	12	-1.43	0.0765	923	0.921	0.924	17132	0.973	-0.264	1.12
MRPS21	-9.26	12	-1.43	0.077	928	0.921	0.923	17127	0.973	-0.369	1.11
SKP1	-8.01	9	-1.42	0.0772	929	0.921	0.923	17126	0.973	-1.092	1.11
EME2	-9.24	12	-1.42	0.0775	930	0.921	0.922	17125	0.973	-0.299	1.11
IRF2BP1	-9.22	12	-1.42	0.078	932	0.921	0.922	17123	0.972	-0.405	1.11
LUZP1	-9.23	12	-1.42	0.0778	931	0.921	0.922	17124	0.972	-0.316	1.11
FOXF1	-9.21	12	-1.42	0.0781	934	0.921	0.922	17121	0.972	-0.22	1.11
PMF1	-9.21	12	-1.42	0.0781	933	0.921	0.922	17122	0.972	-0.402	1.11
JOSD2	-9.2	12	-1.42	0.0783	935	0.921	0.922	17120	0.972	-0.365	1.11
OPRD1	-9.17	12	-1.41	0.079	939	0.921	0.921	17116	0.971	-0.399	1.1
CLUH	-9.15	12	-1.41	0.0795	944	0.921	0.92	17111	0.971	-0.626	1.1
FAM110A	-9.18	12	-1.41	0.0789	937	0.921	0.921	17118	0.971	-0.387	1.1
SAFB2	-9.16	12	-1.41	0.0793	941	0.921	0.921	17114	0.971	-0.303	1.1
POLE3	-9.19	12	-1.41	0.0787	936	0.921	0.921	17119	0.972	-0.353	1.1
SMEK2	-9.17	12	-1.41	0.0791	940	0.921	0.921	17115	0.971	-0.291	1.1
LZTS2	-9.14	12	-1.41	0.0798	947	0.921	0.92	17108	0.971	-0.298	1.1
MSL1	-9.16	12	-1.41	0.0795	943	0.921	0.921	17112	0.971	-0.591	1.1
VPS28	-9.17	12	-1.41	0.079	938	0.921	0.921	17117	0.971	-0.678	1.1
SYNE4	-9.15	12	-1.41	0.0796	946	0.921	0.92	17109	0.971	-0.272	1.1
HIST1H3B	-6.48	6	-1.41	0.0794	942	0.921	0.921	17113	0.971	-0.354	1.1
POLH	-9.14	12	-1.41	0.0799	949	0.921	0.92	17106	0.971	-0.283	1.1
DLEU7	-9.14	12	-1.41	0.0799	948	0.921	0.92	17107	0.971	-0.318	1.1
HSF2	-9.15	12	-1.41	0.0796	945	0.921	0.92	17110	0.971	-0.225	1.1
MMP23B	-9.13	12	-1.4	0.0801	950	0.921	0.92	17105	0.971	-0.436	1.1
LSM5	-7.9	9	-1.4	0.0804	951	0.921	0.92	17104	0.971	-0.585	1.09
FUT5	-9.11	12	-1.4	0.0805	952	0.921	0.919	17103	0.971	-0.114	1.09
DOK7	-9.11	12	-1.4	0.0806	953	0.921	0.919	17102	0.971	-0.263	1.09
LRPAP1	-9.1	12	-1.4	0.0808	954	0.921	0.919	17101	0.97	-0.364	1.09
FAM8A1	-9.08	12	-1.4	0.0812	958	0.921	0.919	17097	0.97	-0.381	1.09
C21orf2	-9.08	12	-1.4	0.0813	959	0.921	0.919	17096	0.97	-0.215	1.09
BCL6	-9.07	12	-1.4	0.0814	961	0.921	0.919	17094	0.97	-0.499	1.09
PLIN5	-9.08	12	-1.4	0.0814	960	0.921	0.919	17095	0.97	-0.183	1.09
TUSC2	-9.08	12	-1.4	0.0812	955	0.921	0.919	17100	0.97	-0.331	1.09
GNRH2	-9.08	12	-1.4	0.0812	956	0.921	0.919	17099	0.97	-0.266	1.09
TTYH2	-9.08	12	-1.4	0.0812	957	0.921	0.919	17098	0.97	-0.229	1.09
ETV6	-9.07	12	-1.39	0.0815	963	0.921	0.918	17092	0.97	-0.148	1.09
ADIG	-9.07	12	-1.39	0.0816	964	0.921	0.918	17091	0.97	-0.342	1.09
RAPGEF1	-9.06	12	-1.39	0.0817	965	0.921	0.918	17090	0.97	-0.517	1.09
TREML1	-9.06	12	-1.39	0.0817	967	0.921	0.918	17088	0.97	-0.229	1.09
C1QB	-9.06	12	-1.39	0.0817	966	0.921	0.918	17089	0.97	-0.453	1.09
RNASEH2C	-9.04	12	-1.39	0.0822	969	0.921	0.918	17086	0.97	-0.72	1.09
MRPL38	-8.69	11	-1.4	0.0815	962	0.921	0.919	17093	0.97	-0.924	1.09
ZFAT	-9.05	12	-1.39	0.0819	968	0.921	0.918	17087	0.97	-0.587	1.09
IGSF9B	-9.02	12	-1.39	0.0827	972	0.921	0.917	17083	0.969	-0.286	1.08
SYCN	-9.04	12	-1.39	0.0823	970	0.921	0.918	17085	0.97	-0.358	1.08
UBASH3B	-9.02	12	-1.39	0.0827	971	0.921	0.917	17084	0.969	-0.197	1.08
FBXO42	-9.02	12	-1.39	0.0828	974	0.921	0.917	17081	0.969	-0.48	1.08
PPME1	-9.02	12	-1.39	0.0828	973	0.921	0.917	17082	0.969	-0.434	1.08
VPS51	-9	12	-1.38	0.0831	975	0.921	0.917	17080	0.969	-0.31	1.08
MPP3	-8.98	12	-1.38	0.0837	978	0.921	0.916	17077	0.969	-0.363	1.08
CIB3	-8.98	12	-1.38	0.0837	979	0.921	0.916	17076	0.969	-0.72	1.08
TDP1	-8.99	12	-1.38	0.0835	976	0.921	0.917	17079	0.969	-0.262	1.08
CDK13	-8.98	12	-1.38	0.0836	977	0.921	0.916	17078	0.969	-0.58	1.08
C6orf136	-8.96	12	-1.38	0.0841	980	0.921	0.916	17075	0.968	-0.342	1.08
PNPLA1	-8.95	12	-1.38	0.0843	982	0.921	0.916	17073	0.968	-0.472	1.07
MED10	-8.96	12	-1.38	0.0842	981	0.921	0.916	17074	0.968	-0.303	1.07
PSMD9	-8.95	12	-1.38	0.0845	984	0.921	0.915	17071	0.968	-0.31	1.07
SZT2	-8.95	12	-1.38	0.0845	983	0.921	0.915	17072	0.968	-0.337	1.07
EIF3H	-8.92	12	-1.37	0.0851	986	0.921	0.915	17069	0.968	-0.577	1.07
ACTC1	-8.93	12	-1.37	0.0848	985	0.921	0.915	17070	0.968	-0.253	1.07
TAF1C	-8.91	12	-1.37	0.0854	988	0.921	0.915	17067	0.968	-0.242	1.07
MS4A15	-8.91	12	-1.37	0.0855	991	0.921	0.915	17064	0.968	-0.274	1.07
SH3BP2	-8.91	12	-1.37	0.0854	989	0.921	0.915	17066	0.968	-0.26	1.07
RBM42	-8.91	12	-1.37	0.0855	990	0.921	0.915	17065	0.968	-0.367	1.07
CAMSAP3	-8.9	12	-1.37	0.0857	993	0.921	0.914	17062	0.967	-0.249	1.07
TMUB1	-8.92	12	-1.37	0.0853	987	0.921	0.915	17068	0.968	-0.276	1.07
KDSR	-8.9	12	-1.37	0.0858	994	0.921	0.914	17061	0.967	-0.934	1.07
LURAP1	-8.9	12	-1.37	0.0857	992	0.921	0.914	17063	0.967	-0.143	1.07
HELQ	-8.89	12	-1.37	0.086	998	0.921	0.914	17057	0.967	-0.196	1.07
ZHX2	-8.89	12	-1.37	0.086	997	0.921	0.914	17058	0.967	-0.473	1.07
UBE2T	-8.88	12	-1.36	0.0863	1003	0.921	0.914	17052	0.967	-0.489	1.06
NECAP2	-8.89	12	-1.37	0.0859	996	0.921	0.914	17059	0.967	-0.259	1.07
HEATR3	-8.88	12	-1.36	0.0861	1000	0.921	0.914	17055	0.967	-0.572	1.06
YIPF7	-8.88	12	-1.36	0.0863	1002	0.921	0.914	17053	0.967	-0.521	1.06
DDRGK1	-8.87	12	-1.36	0.0863	1004	0.921	0.914	17051	0.967	-0.183	1.06
UBR4	-8.89	12	-1.37	0.0859	995	0.921	0.914	17060	0.967	-0.306	1.07
ATM	-8.88	12	-1.37	0.0861	999	0.921	0.914	17056	0.967	-0.354	1.06
SERTAD1	-8.84	12	-1.36	0.0871	1006	0.921	0.913	17049	0.967	-0.352	1.06
CDK12	-8.88	12	-1.36	0.0863	1001	0.921	0.914	17054	0.967	-0.333	1.06
MAP3K4	-8.85	12	-1.36	0.0871	1005	0.921	0.913	17050	0.967	-0.303	1.06
MRPL20	-8.84	12	-1.36	0.0873	1007	0.921	0.913	17048	0.967	-0.421	1.06
KCNQ2	-8.83	12	-1.36	0.0875	1008	0.921	0.913	17047	0.966	-0.556	1.06
DND1	-8.81	12	-1.35	0.088	1010	0.921	0.912	17045	0.966	-0.249	1.06
KLHDC3	-8.8	12	-1.35	0.0883	1011	0.921	0.912	17044	0.966	-0.102	1.05
EGFL7	-8.78	12	-1.35	0.0887	1015	0.921	0.911	17040	0.965	-0.297	1.05
MLF2	-8.78	12	-1.35	0.0887	1013	0.921	0.911	17042	0.965	-0.309	1.05
TRADD	-8.77	12	-1.35	0.0889	1016	0.921	0.911	17039	0.965	-0.173	1.05
MRPL41	-8.79	12	-1.35	0.0885	1012	0.921	0.911	17043	0.966	-0.173	1.05
KIAA0319	-8.82	12	-1.35	0.0877	1009	0.921	0.912	17046	0.966	-0.315	1.06
SALL3	-8.78	12	-1.35	0.0887	1014	0.921	0.911	17041	0.965	-0.097	1.05
PRDM16	-8.75	12	-1.34	0.0895	1020	0.921	0.911	17035	0.965	-0.466	1.05
CTTN	-8.76	12	-1.35	0.0892	1017	0.921	0.911	17038	0.965	-0.3	1.05
BMPR1A	-8.74	12	-1.34	0.0896	1022	0.921	0.91	17033	0.965	-0.547	1.05
C15orf62	-8.75	12	-1.34	0.0894	1019	0.921	0.911	17036	0.965	-0.495	1.05
TOP3A	-8.75	12	-1.34	0.0896	1021	0.921	0.91	17034	0.965	-0.744	1.05
CHTF18	-8.76	12	-1.34	0.0893	1018	0.921	0.911	17037	0.965	-0.131	1.05
CDK5	-8.69	12	-1.33	0.0912	1035	0.921	0.909	17020	0.964	-0.081	1.04
TIMM50	-8.73	12	-1.34	0.0899	1024	0.921	0.91	17031	0.965	-0.388	1.05
GPR26	-8.73	12	-1.34	0.0901	1026	0.921	0.91	17029	0.965	-0.37	1.05
HOXD11	-8.72	12	-1.34	0.0903	1027	0.921	0.91	17028	0.965	-0.402	1.04
NPW	-8.74	12	-1.34	0.0898	1023	0.921	0.91	17032	0.965	-0.251	1.05
WNT11	-8.73	12	-1.34	0.0901	1025	0.921	0.91	17030	0.965	-0.414	1.05
FGF4	-8.71	12	-1.34	0.0905	1028	0.921	0.909	17027	0.964	-0.264	1.04
CYorf17	-8.69	12	-1.33	0.091	1033	0.921	0.909	17022	0.964	-0.357	1.04
FTSJ2	-8.7	12	-1.34	0.0907	1030	0.921	0.909	17025	0.964	-0.256	1.04
UBE2J2	-8.7	12	-1.34	0.0907	1029	0.921	0.909	17026	0.964	-0.279	1.04
MRPL55	-8.7	12	-1.34	0.0908	1031	0.921	0.909	17024	0.964	-0.376	1.04
CHD5	-8.68	12	-1.33	0.0913	1037	0.921	0.909	17018	0.964	-0.231	1.04
FOXO3	-8.7	12	-1.34	0.0908	1032	0.921	0.909	17023	0.964	-0.44	1.04
COMMD4	-8.69	12	-1.33	0.0911	1034	0.921	0.909	17021	0.964	-0.534	1.04
MAD1L1	-8.67	12	-1.33	0.0917	1041	0.921	0.908	17014	0.964	-0.289	1.04
FGFBP3	-8.68	12	-1.33	0.0912	1036	0.921	0.909	17019	0.964	-0.356	1.04
LRFN2	-8.68	12	-1.33	0.0914	1040	0.921	0.909	17015	0.964	-0.229	1.04
BTBD2	-8.68	12	-1.33	0.0914	1039	0.921	0.909	17016	0.964	-0.179	1.04
COX5B	-8.68	12	-1.33	0.0913	1038	0.921	0.909	17017	0.964	-0.378	1.04
OSGIN1	-8.66	12	-1.33	0.0919	1042	0.921	0.908	17013	0.964	-0.352	1.04
FOXD3	-7.48	9	-1.33	0.0923	1045	0.921	0.908	17010	0.963	-0.106	1.03
ADCYAP1	-8.64	12	-1.33	0.0923	1043	0.921	0.908	17012	0.963	-0.248	1.03
WBP11	-8.27	11	-1.33	0.0925	1046	0.921	0.908	17009	0.963	-0.671	1.03
C1orf27	-8.64	12	-1.33	0.0925	1047	0.921	0.908	17008	0.963	-0.384	1.03
LIG3	-8.64	12	-1.33	0.0923	1044	0.921	0.908	17011	0.963	-0.442	1.03
WBP1L	-8.63	12	-1.32	0.0927	1050	0.921	0.907	17005	0.963	-0.247	1.03
ACVRL1	-8.62	12	-1.32	0.0928	1051	0.921	0.907	17004	0.963	-0.426	1.03
TKT	-8.63	12	-1.33	0.0926	1048	0.921	0.907	17007	0.963	-0.526	1.03
TEX33	-8.63	12	-1.33	0.0926	1049	0.921	0.907	17006	0.963	-0.46	1.03
BTAF1	-8.62	12	-1.32	0.0929	1053	0.921	0.907	17002	0.963	-1.28	1.03
CSRNP1	-8.62	12	-1.32	0.0928	1052	0.921	0.907	17003	0.963	-0.25	1.03
ADAT2	-7.45	9	-1.32	0.0934	1057	0.921	0.907	16998	0.963	-0.369	1.03
MRPL36	-8.6	12	-1.32	0.0934	1058	0.921	0.907	16997	0.963	-0.46	1.03
ICAM5	-8.61	12	-1.32	0.0931	1054	0.921	0.907	17001	0.963	-0.219	1.03
MBTPS1	-8.6	12	-1.32	0.0936	1060	0.921	0.906	16995	0.963	-0.89	1.03
ANKRD54	-8.61	12	-1.32	0.0932	1055	0.921	0.907	17000	0.963	-0.388	1.03
SLC14A2	-8.6	12	-1.32	0.0935	1059	0.921	0.907	16996	0.963	-0.317	1.03
KBTBD11	-8.58	12	-1.32	0.094	1062	0.921	0.906	16993	0.963	-0.316	1.03
MGRN1	-8.61	12	-1.32	0.0933	1056	0.921	0.907	16999	0.963	-0.38	1.03
PCDHB12	-8.58	12	-1.32	0.094	1063	0.921	0.906	16992	0.963	-0.197	1.03
NUDCD3	-8.56	12	-1.31	0.0944	1065	0.921	0.906	16990	0.962	-0.757	1.03
RHBDL1	-8.57	12	-1.31	0.0943	1064	0.921	0.906	16991	0.962	-0.305	1.03
SLC22A31	-8.22	11	-1.32	0.0938	1061	0.921	0.906	16994	0.963	-1.169	1.03
GP1BB	-8.56	12	-1.31	0.0945	1067	0.921	0.905	16988	0.962	-0.168	1.02
PPP1R11	-8.56	12	-1.31	0.0945	1068	0.921	0.905	16987	0.962	-0.56	1.02
NAT8	-8.56	12	-1.31	0.0946	1069	0.921	0.905	16986	0.962	-0.313	1.02
PHF10	-8.55	12	-1.31	0.0948	1071	0.921	0.905	16984	0.962	-0.182	1.02
PGAM5	-8.54	12	-1.31	0.0951	1073	0.921	0.905	16982	0.962	-0.396	1.02
LRP1	-8.56	12	-1.31	0.0946	1070	0.921	0.905	16985	0.962	-0.321	1.02
NONO	-8.54	12	-1.31	0.095	1072	0.921	0.905	16983	0.962	-0.279	1.02
PLEKHD1	-8.56	12	-1.31	0.0945	1066	0.921	0.906	16989	0.962	-0.093	1.02
SLC26A1	-8.54	12	-1.31	0.0951	1074	0.921	0.905	16981	0.962	-0.07	1.02
LETM1	-7.39	9	-1.31	0.0954	1076	0.921	0.905	16979	0.962	-0.586	1.02
SNRNP27	-8.51	12	-1.31	0.0958	1080	0.921	0.904	16975	0.962	-0.734	1.02
RPLP0	-8.53	12	-1.31	0.0953	1075	0.921	0.905	16980	0.962	-0.88	1.02
SNRK	-8.52	12	-1.31	0.0956	1077	0.921	0.904	16978	0.962	-0.256	1.02
POLR2G	-8.51	12	-1.31	0.0959	1081	0.921	0.904	16974	0.962	-1.427	1.02
FGF19	-8.52	12	-1.31	0.0957	1078	0.921	0.904	16977	0.962	-0.331	1.02
ILF2	-8.48	12	-1.3	0.0966	1089	0.921	0.903	16966	0.961	-0.107	1.02
TEAD3	-8.5	12	-1.3	0.0962	1085	0.921	0.904	16970	0.962	-0.084	1.02
DCTPP1	-8.51	12	-1.3	0.096	1082	0.921	0.904	16973	0.962	-0.332	1.02
MED18	-8.15	11	-1.31	0.0957	1079	0.921	0.904	16976	0.962	-0.426	1.02
NHLRC4	-8.5	12	-1.3	0.096	1083	0.921	0.904	16972	0.962	-0.282	1.02
PRX	-8.48	12	-1.3	0.0967	1090	0.921	0.903	16965	0.961	-0.439	1.01
ITPKA	-8.5	12	-1.3	0.0961	1084	0.921	0.904	16971	0.962	-0.064	1.02
ZNF428	-8.5	12	-1.3	0.0963	1087	0.921	0.904	16968	0.962	-0.379	1.02
HNRNPUL2	-8.49	12	-1.3	0.0964	1088	0.921	0.904	16967	0.962	-0.26	1.02
IL17A	-8.5	12	-1.3	0.0962	1086	0.921	0.904	16969	0.962	-0.537	1.02
ARFGEF2	-8.48	12	-1.3	0.0967	1092	0.921	0.903	16963	0.961	-0.309	1.01
LDLRAD2	-8.48	12	-1.3	0.0967	1093	0.921	0.903	16962	0.961	-0.105	1.01
LRWD1	-8.47	12	-1.3	0.0971	1096	0.921	0.903	16959	0.961	-0.287	1.01
LAMB2	-8.47	12	-1.3	0.0969	1095	0.921	0.903	16960	0.961	-0.417	1.01
PEBP1	-8.48	12	-1.3	0.0967	1091	0.921	0.903	16964	0.961	-0.328	1.01
ZNF541	-8.45	12	-1.3	0.0974	1100	0.921	0.903	16955	0.961	-0.321	1.01
GATC	-8.46	12	-1.3	0.0972	1097	0.921	0.903	16958	0.961	-0.269	1.01
TMEM143	-8.45	12	-1.3	0.0976	1101	0.921	0.902	16954	0.961	-0.285	1.01
BCLAF1	-8.48	12	-1.3	0.0968	1094	0.921	0.903	16961	0.961	-0.498	1.01
GDPGP1	-8.46	12	-1.3	0.0972	1098	0.921	0.903	16957	0.961	-0.414	1.01
SNRPB	-8.46	12	-1.3	0.0973	1099	0.921	0.903	16956	0.961	-0.549	1.01
EIF5	-8.42	12	-1.29	0.0984	1113	0.921	0.902	16942	0.961	0.033	1.01
RREB1	-8.44	12	-1.29	0.0977	1102	0.921	0.902	16953	0.961	-0.532	1.01
GALK1	-8.44	12	-1.29	0.0979	1103	0.921	0.902	16952	0.961	-0.39	1.01
IRF6	-8.43	12	-1.29	0.0981	1105	0.921	0.902	16950	0.961	-0.3	1.01
MNT	-8.06	11	-1.29	0.0985	1114	0.921	0.902	16941	0.961	-0.188	1.01
TRIO	-8.4	12	-1.29	0.0989	1121	0.921	0.901	16934	0.961	-0.371	1
AKR1B10	-8.43	12	-1.29	0.0981	1104	0.921	0.902	16951	0.961	-0.379	1.01
SELRC1	-8.41	12	-1.29	0.0985	1115	0.921	0.901	16940	0.961	-0.29	1.01
COX5A	-8.42	12	-1.29	0.0984	1111	0.921	0.902	16944	0.961	-0.335	1.01
ZNF384	-8.43	12	-1.29	0.0982	1106	0.921	0.902	16949	0.961	-0.364	1.01
TLK2	-8.42	12	-1.29	0.0982	1107	0.921	0.902	16948	0.961	-0.495	1.01
PLEKHG2	-8.4	12	-1.29	0.0989	1120	0.921	0.901	16935	0.961	-0.311	1
TRMT5	-8.42	12	-1.29	0.0984	1108	0.921	0.902	16947	0.961	-1.014	1.01
RHOQ	-8.4	12	-1.29	0.0988	1119	0.921	0.901	16936	0.961	-0.217	1.01
MYH10	-8.42	12	-1.29	0.0984	1109	0.921	0.902	16946	0.961	-0.417	1.01
PIGF	-8.4	12	-1.29	0.099	1122	0.921	0.901	16933	0.961	-0.385	1
CNGA1	-8.41	12	-1.29	0.0986	1117	0.921	0.901	16938	0.961	-0.043	1.01
TTYH1	-8.42	12	-1.29	0.0984	1110	0.921	0.902	16945	0.961	-0.186	1.01
NFU1	-8.42	12	-1.29	0.0984	1112	0.921	0.902	16943	0.961	-0.148	1.01
FAM122A	-8.41	12	-1.29	0.0986	1116	0.921	0.901	16939	0.961	-0.321	1.01
ESCO1	-8.4	12	-1.29	0.0988	1118	0.921	0.901	16937	0.961	-0.44	1.01
HDAC8	-8.37	12	-1.28	0.0999	1128	0.921	0.9	16927	0.96	-0.302	1
ARHGEF11	-8.38	12	-1.28	0.0994	1124	0.921	0.901	16931	0.96	-0.094	1
GLRX5	-8.39	12	-1.29	0.0991	1123	0.921	0.901	16932	0.961	-0.454	1
UBLCP1	-8.37	12	-1.28	0.0996	1125	0.921	0.9	16930	0.96	-0.507	1
FAM89B	-8.37	12	-1.28	0.0996	1126	0.921	0.9	16929	0.96	-0.463	1
SNRNP200	-8.37	12	-1.28	0.0997	1127	0.921	0.9	16928	0.96	-0.505	1
MZT2B	-8.36	12	-1.28	0.0999	1129	0.921	0.9	16926	0.96	-0.43	1
MRPL40	-8.36	12	-1.28	0.1	1130	0.921	0.9	16925	0.96	-0.347	1
RILP	-8.35	12	-1.28	0.1	1131	0.921	0.9	16924	0.96	-0.357	1
SNTB1	-8.34	12	-1.28	0.1	1133	0.921	0.9	16922	0.96	-0.235	1
LONP1	-8.34	12	-1.28	0.101	1135	0.921	0.899	16920	0.96	-0.888	1
LRRC26	-8.34	12	-1.28	0.101	1134	0.921	0.899	16921	0.96	-0.271	1
KRT31	-8.33	12	-1.28	0.101	1138	0.921	0.899	16917	0.96	-0.248	1
AIFM2	-8.35	12	-1.28	0.1	1132	0.921	0.9	16923	0.96	-0.228	1
GCNT3	-8.31	12	-1.27	0.101	1142	0.921	0.899	16913	0.959	-0.398	1
SREBF1	-8.32	12	-1.27	0.101	1141	0.921	0.899	16914	0.959	-0.285	1
L1CAM	-8.25	12	-1.26	0.103	1161	0.921	0.897	16894	0.958	-0.343	0.99
FERMT1	-8.32	12	-1.28	0.101	1140	0.921	0.899	16915	0.959	-0.33	1
GGACT	-8.32	12	-1.28	0.101	1139	0.921	0.899	16916	0.959	-0.249	1
EMC8	-8.33	12	-1.28	0.101	1137	0.921	0.899	16918	0.96	-0.359	1
MRPL22	-8.3	12	-1.27	0.102	1143	0.921	0.898	16912	0.959	-0.549	0.99
PLIN4	-8.28	12	-1.27	0.102	1150	0.921	0.898	16905	0.959	-0.304	0.99
VMO1	-8.29	12	-1.27	0.102	1148	0.921	0.898	16907	0.959	-0.172	0.99
MYT1	-8.3	12	-1.27	0.102	1146	0.921	0.898	16909	0.959	-0.38	0.99
FIGNL1	-8.29	12	-1.27	0.102	1147	0.921	0.898	16908	0.959	-0.146	0.99
HMX2	-8.3	12	-1.27	0.102	1145	0.921	0.898	16910	0.959	-0.264	0.99
INA	-8.27	12	-1.27	0.102	1155	0.921	0.898	16900	0.959	-0.462	0.99
ZNF598	-8.3	12	-1.27	0.102	1144	0.921	0.898	16911	0.959	-0.41	0.99
APCDD1L	-8.28	12	-1.27	0.102	1154	0.921	0.898	16901	0.959	-0.329	0.99
C10orf76	-8.28	12	-1.27	0.102	1152	0.921	0.898	16903	0.959	-0.243	0.99
WEE1	-8.29	12	-1.27	0.102	1149	0.921	0.898	16906	0.959	0.139	0.99
EPG5	-8.28	12	-1.27	0.102	1153	0.921	0.898	16902	0.959	-0.243	0.99
LHPP	-8.25	12	-1.26	0.103	1158	0.921	0.897	16897	0.958	-0.342	0.99
SETD1A	-8.25	12	-1.26	0.103	1160	0.921	0.897	16895	0.958	-0.866	0.99
BID	-8.24	12	-1.26	0.103	1163	0.921	0.897	16892	0.958	-0.409	0.99
ATRN	-8.27	12	-1.27	0.103	1156	0.921	0.897	16899	0.959	-0.34	0.99
DDX46	-8.28	12	-1.27	0.102	1151	0.921	0.898	16904	0.959	-0.63	0.99
MRGBP	-8.25	12	-1.26	0.103	1159	0.921	0.897	16896	0.958	-0.448	0.99
MICALL2	-8.26	12	-1.27	0.103	1157	0.921	0.897	16898	0.959	-0.283	0.99
GHRL	-8.25	12	-1.26	0.103	1162	0.921	0.897	16893	0.958	-0.117	0.99
PDZD4	-8.24	12	-1.26	0.103	1164	0.921	0.897	16891	0.958	-0.273	0.99
GPS1	-8.23	12	-1.26	0.104	1166	0.921	0.896	16889	0.958	-0.652	0.98
COX15	-8.23	12	-1.26	0.104	1168	0.921	0.896	16887	0.958	-0.337	0.98
C17orf74	-8.23	12	-1.26	0.104	1167	0.921	0.896	16888	0.958	-0.355	0.98
CCDC93	-8.21	12	-1.26	0.104	1174	0.921	0.896	16881	0.958	-0.435	0.98
HTR1B	-8.23	12	-1.26	0.104	1165	0.921	0.896	16890	0.958	-0.214	0.98
PRDX5	-8.21	12	-1.26	0.104	1173	0.921	0.896	16882	0.958	-0.189	0.98
PFDN2	-8.21	12	-1.26	0.104	1171	0.921	0.896	16884	0.958	-0.486	0.98
C11orf35	-8.2	12	-1.26	0.105	1177	0.921	0.895	16878	0.958	-0.323	0.98
MRP63	-8.21	12	-1.26	0.104	1172	0.921	0.896	16883	0.958	-0.571	0.98
ATRX	-8.2	12	-1.26	0.105	1176	0.921	0.895	16879	0.958	-0.495	0.98
N4BP1	-7.85	11	-1.26	0.105	1175	0.921	0.895	16880	0.958	-0.326	0.98
EIF4A1	-8.22	12	-1.26	0.104	1170	0.921	0.896	16885	0.958	-0.741	0.98
UBE2Q1	-8.22	12	-1.26	0.104	1169	0.921	0.896	16886	0.958	-0.359	0.98
GET4	-8.18	12	-1.25	0.105	1180	0.921	0.895	16875	0.958	-0.357	0.98
IL27RA	-8.19	12	-1.25	0.105	1179	0.921	0.895	16876	0.958	-0.195	0.98
PPP1R16B	-8.19	12	-1.25	0.105	1178	0.921	0.895	16877	0.958	-0.408	0.98
PIK3C3	-8.17	12	-1.25	0.105	1184	0.921	0.895	16871	0.957	-0.973	0.98
PRADC1	-8.17	12	-1.25	0.105	1185	0.921	0.895	16870	0.957	-0.185	0.98
TBC1D25	-8.18	12	-1.25	0.105	1181	0.921	0.895	16874	0.958	-0.302	0.98
ZNF106	-8.18	12	-1.25	0.105	1182	0.921	0.895	16873	0.957	-0.407	0.98
ABI1	-8.18	12	-1.25	0.105	1183	0.921	0.895	16872	0.957	-0.21	0.98
TMEM33	-8.15	12	-1.25	0.106	1189	0.921	0.894	16866	0.957	-0.588	0.97
SKA2	-8.14	12	-1.25	0.106	1191	0.921	0.894	16864	0.957	-1.316	0.97
TMEM199	-8.16	12	-1.25	0.106	1186	0.921	0.894	16869	0.957	-0.183	0.97
TMEM131	-8.15	12	-1.25	0.106	1188	0.921	0.894	16867	0.957	-0.346	0.97
C1orf112	-8.14	12	-1.25	0.106	1195	0.921	0.894	16860	0.957	-0.441	0.97
COX19	-8.14	12	-1.25	0.106	1193	0.921	0.894	16862	0.957	-0.333	0.97
GLMN	-8.14	12	-1.25	0.106	1192	0.921	0.894	16863	0.957	-0.646	0.97
GRAMD2	-8.15	12	-1.25	0.106	1187	0.921	0.894	16868	0.957	-0.159	0.97
WDR5	-8.14	12	-1.25	0.106	1190	0.921	0.894	16865	0.957	-0.814	0.97
LSM14B	-8.11	12	-1.24	0.107	1201	0.921	0.893	16854	0.956	-0.156	0.97
RHPN2	-8.13	12	-1.25	0.106	1196	0.921	0.894	16859	0.957	-0.197	0.97
EPHB3	-8.12	12	-1.24	0.107	1199	0.921	0.893	16856	0.957	-0.268	0.97
SLC6A19	-8.12	12	-1.24	0.107	1198	0.921	0.893	16857	0.957	-0.019	0.97
OTUD6B	-8.12	12	-1.24	0.107	1197	0.921	0.893	16858	0.957	-0.462	0.97
WIZ	-8.11	12	-1.24	0.107	1202	0.921	0.893	16853	0.956	-0.269	0.97
C7orf26	-8.12	12	-1.24	0.107	1200	0.921	0.893	16855	0.957	-0.441	0.97
PPP5C	-8.11	12	-1.24	0.107	1203	0.921	0.893	16852	0.956	-0.194	0.97
DTX2	-8.08	12	-1.24	0.108	1211	0.921	0.892	16844	0.956	-0.079	0.97
MBD2	-8.09	12	-1.24	0.108	1206	0.921	0.892	16849	0.956	-0.502	0.97
ACPT	-8.14	12	-1.25	0.106	1194	0.921	0.894	16861	0.957	-0.288	0.97
IL10RA	-8.1	12	-1.24	0.108	1205	0.921	0.892	16850	0.956	-0.33	0.97
WNT3A	-8.08	12	-1.24	0.108	1209	0.921	0.892	16846	0.956	-0.33	0.97
CYC1	-8.09	12	-1.24	0.108	1207	0.921	0.892	16848	0.956	-0.302	0.97
VPS45	-8.08	12	-1.24	0.108	1212	0.921	0.892	16843	0.956	-0.54	0.97
VBP1	-8.1	12	-1.24	0.107	1204	0.921	0.893	16851	0.956	-0.539	0.97
SIN3A	-8.08	12	-1.24	0.108	1210	0.921	0.892	16845	0.956	-0.605	0.97
TEC	-8.08	12	-1.24	0.108	1208	0.921	0.892	16847	0.956	-0.212	0.97
CCL17	-8.07	12	-1.24	0.108	1214	0.921	0.892	16841	0.956	-0.231	0.97
BDKRB2	-8.05	12	-1.23	0.109	1219	0.921	0.891	16836	0.955	-0.29	0.96
TLE3	-8.08	12	-1.24	0.108	1213	0.921	0.892	16842	0.956	-0.329	0.97
SIK3	-8.07	12	-1.23	0.108	1215	0.921	0.892	16840	0.956	-0.335	0.97
PHOX2A	-8.06	12	-1.23	0.109	1216	0.921	0.891	16839	0.956	-0.319	0.96
CAMLG	-8.05	12	-1.23	0.109	1217	0.921	0.891	16838	0.956	-0.164	0.96
RPUSD4	-8.05	12	-1.23	0.109	1218	0.921	0.891	16837	0.955	-0.206	0.96
GGNBP2	-6.96	9	-1.23	0.109	1221	0.921	0.891	16834	0.955	-0.45	0.96
PRR18	-8.02	12	-1.23	0.11	1226	0.921	0.89	16829	0.955	-0.429	0.96
NDUFA11	-8.03	12	-1.23	0.11	1223	0.921	0.89	16832	0.955	-0.088	0.96
SHARPIN	-8.04	12	-1.23	0.109	1222	0.921	0.891	16833	0.955	-0.325	0.96
MPV17L2	-8.04	12	-1.23	0.109	1220	0.921	0.891	16835	0.955	-0.184	0.96
ZSCAN2	-8.02	12	-1.23	0.11	1225	0.921	0.89	16830	0.955	-0.186	0.96
C5AR2	-8.01	12	-1.23	0.11	1227	0.921	0.89	16828	0.955	-0.318	0.96
FH	-8.02	12	-1.23	0.11	1224	0.921	0.89	16831	0.955	-0.503	0.96
VWA1	-8	12	-1.22	0.11	1230	0.921	0.89	16825	0.955	-0.467	0.96
KCMF1	-8	12	-1.22	0.11	1231	0.921	0.89	16824	0.955	-0.452	0.96
SIRT6	-8.01	12	-1.23	0.11	1228	0.921	0.89	16827	0.955	-0.28	0.96
KLK8	-8	12	-1.22	0.111	1232	0.921	0.889	16823	0.954	-0.268	0.95
ZACN	-7.97	12	-1.22	0.111	1240	0.921	0.889	16815	0.954	-0.219	0.95
ZEB2	-7.99	12	-1.22	0.111	1235	0.921	0.889	16820	0.954	-0.136	0.95
ZMYM3	-8	12	-1.22	0.111	1233	0.921	0.889	16822	0.954	-0.282	0.95
BCL2L1	-7.98	12	-1.22	0.111	1237	0.921	0.889	16818	0.954	-0.326	0.95
RPRM	-7.98	12	-1.22	0.111	1238	0.921	0.889	16817	0.954	-0.455	0.95
CDC6	-7.98	12	-1.22	0.111	1239	0.921	0.889	16816	0.954	-0.549	0.95
SLC39A13	-7.99	12	-1.22	0.111	1236	0.921	0.889	16819	0.954	-0.486	0.95
PTPN1	-7.99	12	-1.22	0.111	1234	0.921	0.889	16821	0.954	-0.309	0.95
SENP8	-6.88	9	-1.22	0.112	1249	0.921	0.888	16806	0.954	-0.24	0.95
GALE	-7.97	12	-1.22	0.111	1241	0.921	0.889	16814	0.954	-0.285	0.95
GOSR1	-7.95	12	-1.22	0.112	1246	0.921	0.888	16809	0.954	-0.084	0.95
ANO7	-7.96	12	-1.22	0.112	1242	0.921	0.888	16813	0.954	-0.268	0.95
SEMA4A	-7.95	12	-1.22	0.112	1247	0.921	0.888	16808	0.954	-0.216	0.95
VTA1	-7.95	12	-1.22	0.112	1248	0.921	0.888	16807	0.954	-0.398	0.95
NKG7	-7.96	12	-1.22	0.112	1243	0.921	0.888	16812	0.954	-0.366	0.95
JDP2	-7.95	12	-1.22	0.112	1245	0.921	0.888	16810	0.954	-0.388	0.95
REXO1	-7.92	12	-1.21	0.113	1255	0.921	0.887	16800	0.953	-0.335	0.95
GADD45GIP1	-7.94	12	-1.21	0.112	1250	0.921	0.888	16805	0.954	-0.374	0.95
NDE1	-7.93	12	-1.21	0.113	1252	0.921	0.887	16803	0.953	-0.646	0.95
FUT1	-7.93	12	-1.21	0.113	1251	0.921	0.887	16804	0.953	-0.23	0.95
GSTO1	-7.92	12	-1.21	0.113	1257	0.921	0.887	16798	0.953	-0.512	0.95
WDR11	-7.91	12	-1.21	0.113	1258	0.921	0.887	16797	0.953	-0.409	0.95
PCDH7	-7.93	12	-1.21	0.113	1254	0.921	0.887	16801	0.953	-0.083	0.95
STK4	-7.91	12	-1.21	0.113	1259	0.921	0.887	16796	0.953	-0.245	0.95
TCL1B	-7.9	12	-1.21	0.113	1261	0.921	0.887	16794	0.953	-0.244	0.95
TIMM21	-7.88	12	-1.2	0.114	1265	0.921	0.886	16790	0.952	-0.285	0.94
WDR70	-7.92	12	-1.21	0.113	1256	0.921	0.887	16799	0.953	0.143	0.95
POLR2J	-5.61	6	-1.21	0.113	1253	0.921	0.887	16802	0.953	-0.217	0.95
DUSP5	-7.9	12	-1.21	0.114	1262	0.921	0.886	16793	0.953	-0.223	0.94
RSRC2	-7.91	12	-1.21	0.113	1260	0.921	0.887	16795	0.953	-0.276	0.95
FAM83E	-7.88	12	-1.21	0.114	1264	0.921	0.886	16791	0.953	-0.289	0.94
C7orf13	-7.89	12	-1.21	0.114	1263	0.921	0.886	16792	0.953	-0.291	0.94
NT5DC2	-7.86	12	-1.2	0.115	1267	0.921	0.885	16788	0.952	-0.261	0.94
NRTN	-7.86	12	-1.2	0.115	1266	0.921	0.885	16789	0.952	-0.105	0.94
ETV2	-7.85	12	-1.2	0.115	1270	0.921	0.885	16785	0.952	-0.304	0.94
SLC25A19	-7.84	12	-1.2	0.115	1271	0.921	0.885	16784	0.952	-0.276	0.94
PRR12	-7.85	12	-1.2	0.115	1269	0.921	0.885	16786	0.952	-0.315	0.94
TMEM177	-7.86	12	-1.2	0.115	1268	0.921	0.885	16787	0.952	-0.308	0.94
ZC3H3	-7.83	12	-1.2	0.116	1275	0.921	0.884	16780	0.951	-0.23	0.94
LMNA	-7.51	11	-1.2	0.115	1272	0.921	0.885	16783	0.952	-0.278	0.94
ADCY7	-7.79	12	-1.19	0.117	1288	0.921	0.883	16767	0.951	-0.178	0.93
CACNG5	-7.82	12	-1.2	0.116	1276	0.921	0.884	16779	0.951	-0.196	0.94
SUDS3	-7.82	12	-1.2	0.116	1277	0.921	0.884	16778	0.951	-0.246	0.94
KAT8	-6.78	9	-1.2	0.116	1273	0.921	0.884	16782	0.951	-0.976	0.94
C16orf96	-7.83	12	-1.2	0.116	1274	0.921	0.884	16781	0.951	-0.172	0.94
SALL1	-7.81	12	-1.19	0.116	1280	0.921	0.884	16775	0.951	-0.281	0.94
EEF1A2	-7.82	12	-1.2	0.116	1278	0.921	0.884	16777	0.951	-0.405	0.94
UFSP2	-7.81	12	-1.19	0.116	1281	0.921	0.884	16774	0.951	-0.371	0.94
SIGLEC8	-7.82	12	-1.19	0.116	1279	0.921	0.884	16776	0.951	-0.24	0.94
ANKRD16	-7.8	12	-1.19	0.117	1285	0.921	0.883	16770	0.951	-0.17	0.93
PDZD7	-7.79	12	-1.19	0.117	1287	0.921	0.883	16768	0.951	-0.139	0.93
LHX5	-7.8	12	-1.19	0.117	1284	0.921	0.883	16771	0.951	-0.362	0.93
DYNLT1	-7.81	12	-1.19	0.116	1282	0.921	0.884	16773	0.951	-0.077	0.94
BRI3BP	-7.81	12	-1.19	0.116	1283	0.921	0.884	16772	0.951	-0.368	0.94
MCHR1	-7.79	12	-1.19	0.117	1290	0.921	0.883	16765	0.951	-0.305	0.93
C5orf49	-7.79	12	-1.19	0.117	1289	0.921	0.883	16766	0.951	-0.306	0.93
C11orf57	-7.76	12	-1.19	0.118	1296	0.921	0.882	16759	0.95	-0.284	0.93
BCL3	-7.79	12	-1.19	0.117	1286	0.921	0.883	16769	0.951	-0.373	0.93
GPR108	-7.78	12	-1.19	0.117	1291	0.921	0.883	16764	0.951	-0.311	0.93
GPR20	-7.76	12	-1.19	0.118	1295	0.921	0.882	16760	0.95	-0.279	0.93
RSU1	-7.72	12	-1.18	0.119	1306	0.921	0.881	16749	0.949	-0.181	0.92
SLC35C1	-7.75	12	-1.18	0.118	1299	0.921	0.882	16756	0.95	-0.155	0.93
PCDHGA5	-7.76	12	-1.19	0.118	1297	0.921	0.882	16758	0.95	-0.37	0.93
NT5C1A	-7.77	12	-1.19	0.118	1292	0.921	0.882	16763	0.95	-0.228	0.93
WDR82	-7.77	12	-1.19	0.118	1293	0.921	0.882	16762	0.95	0.018	0.93
PRDM10	-7.77	12	-1.19	0.118	1294	0.921	0.882	16761	0.95	-0.438	0.93
HOXC5	-7.75	12	-1.18	0.118	1301	0.921	0.882	16754	0.95	-0.605	0.93
GGT7	-7.75	12	-1.18	0.118	1300	0.921	0.882	16755	0.95	-0.342	0.93
PIN1	-7.75	12	-1.18	0.118	1298	0.921	0.882	16757	0.95	-0.345	0.93
TRIM11	-7.73	12	-1.18	0.119	1304	0.921	0.881	16751	0.95	-0.211	0.92
TSC22D2	-7.74	12	-1.18	0.119	1303	0.921	0.881	16752	0.95	-0.2	0.92
HIST1H3C	-7.72	12	-1.18	0.119	1310	0.921	0.881	16745	0.949	-0.156	0.92
MRPL16	-7.71	12	-1.18	0.119	1312	0.921	0.881	16743	0.949	-0.139	0.92
SPATA33	-7.06	10	-1.18	0.119	1302	0.921	0.881	16753	0.95	-0.293	0.92
IDUA	-7.71	12	-1.18	0.119	1311	0.921	0.881	16744	0.949	-0.091	0.92
ZNF629	-6.68	9	-1.18	0.12	1313	0.921	0.88	16742	0.949	-0.261	0.92
OR10H2	-7.72	12	-1.18	0.119	1309	0.921	0.881	16746	0.949	-0.092	0.92
PIGW	-7.73	12	-1.18	0.119	1305	0.921	0.881	16750	0.95	-0.142	0.92
MRPS26	-7.72	12	-1.18	0.119	1308	0.921	0.881	16747	0.949	0.086	0.92
TOLLIP	-7.7	12	-1.18	0.12	1314	0.921	0.88	16741	0.949	-0.388	0.92
FHOD1	-7.72	12	-1.18	0.119	1307	0.921	0.881	16748	0.949	-0.316	0.92
GRIK5	-7.69	12	-1.17	0.12	1319	0.921	0.88	16736	0.949	-0.243	0.92
MCM2	-7.68	12	-1.17	0.12	1322	0.921	0.88	16733	0.949	-0.599	0.92
WIBG	-7.7	12	-1.18	0.12	1315	0.921	0.88	16740	0.949	-0.282	0.92
VASP	-7.69	12	-1.17	0.12	1318	0.921	0.88	16737	0.949	-0.148	0.92
ZNF34	-7.68	12	-1.17	0.12	1321	0.921	0.88	16734	0.949	-0.582	0.92
PODN	-7.69	12	-1.18	0.12	1316	0.921	0.88	16739	0.949	-0.354	0.92
IGFALS	-7.69	12	-1.17	0.12	1317	0.921	0.88	16738	0.949	-0.352	0.92
TTC34	-7.35	11	-1.17	0.12	1323	0.921	0.88	16732	0.949	-0.317	0.92
GRPEL2	-7.68	12	-1.17	0.12	1324	0.921	0.88	16731	0.949	0.019	0.92
AP2M1	-7.67	12	-1.17	0.121	1329	0.921	0.879	16726	0.949	-0.57	0.92
CUL5	-7.67	12	-1.17	0.121	1331	0.921	0.879	16724	0.949	-0.231	0.92
F12	-7.67	12	-1.17	0.121	1332	0.921	0.879	16723	0.949	-0.253	0.92
KANK3	-7.68	12	-1.17	0.12	1326	0.921	0.88	16729	0.949	-0.228	0.92
DDR1	-7.67	12	-1.17	0.121	1333	0.921	0.879	16722	0.949	-0.335	0.92
TMEM70	-7.67	12	-1.17	0.121	1330	0.921	0.879	16725	0.949	-0.259	0.92
SRPR	-7.68	12	-1.17	0.12	1325	0.921	0.88	16730	0.949	-0.573	0.92
C11orf88	-7.69	12	-1.17	0.12	1320	0.921	0.88	16735	0.949	-0.007	0.92
PRR19	-7.65	12	-1.17	0.121	1334	0.921	0.879	16721	0.949	-0.317	0.92
RAB7A	-7.65	12	-1.17	0.121	1335	0.921	0.879	16720	0.949	-0.05	0.92
TARS2	-7.64	12	-1.17	0.122	1338	0.921	0.878	16717	0.949	-0.491	0.91
AIFM1	-7.65	12	-1.17	0.121	1337	0.921	0.879	16718	0.949	-0.501	0.92
TUBGCP3	-7.67	12	-1.17	0.121	1327	0.921	0.879	16728	0.949	-0.377	0.92
GTF2F1	-7.65	12	-1.17	0.121	1336	0.921	0.879	16719	0.949	-0.581	0.92
PTPRN2	-7.64	12	-1.17	0.122	1339	0.921	0.878	16716	0.949	-0.307	0.91
CWC25	-7.67	12	-1.17	0.121	1328	0.921	0.879	16727	0.949	-0.267	0.92
MRPL3	-7.63	12	-1.17	0.122	1341	0.921	0.878	16714	0.948	-0.325	0.91
TBCA	-6.96	10	-1.16	0.122	1343	0.921	0.878	16712	0.948	-0.327	0.91
MORF4L1	-7.62	12	-1.16	0.122	1346	0.921	0.878	16709	0.948	-0.258	0.91
GCC1	-7.64	12	-1.17	0.122	1340	0.921	0.878	16715	0.949	-0.259	0.91
NFAT5	-7.63	12	-1.16	0.122	1342	0.921	0.878	16713	0.948	-0.463	0.91
ICMT	-7.61	12	-1.16	0.123	1348	0.921	0.877	16707	0.948	-0.23	0.91
RBBP8NL	-7.62	12	-1.16	0.122	1344	0.921	0.878	16711	0.948	-0.106	0.91
TRIM24	-7.61	12	-1.16	0.123	1347	0.921	0.877	16708	0.948	-0.209	0.91
LIG1	-7.61	12	-1.16	0.123	1349	0.921	0.877	16706	0.948	-0.325	0.91
DCAF12L1	-7.6	12	-1.16	0.123	1352	0.921	0.877	16703	0.948	-0.096	0.91
WBP2NL	-7.61	12	-1.16	0.123	1350	0.921	0.877	16705	0.948	-0.168	0.91
SKIDA1	-7.62	12	-1.16	0.122	1345	0.921	0.878	16710	0.948	-0.321	0.91
MYADML2	-7.6	12	-1.16	0.123	1353	0.921	0.877	16702	0.948	-0.437	0.91
BAALC	-7.61	12	-1.16	0.123	1351	0.921	0.877	16704	0.948	-0.422	0.91
NCF1	-7.6	12	-1.16	0.123	1355	0.921	0.877	16700	0.948	-0.489	0.91
FAM98C	-7.6	12	-1.16	0.123	1354	0.921	0.877	16701	0.948	-0.362	0.91
MFSD3	-7.59	12	-1.16	0.123	1356	0.921	0.877	16699	0.948	-0.261	0.91
MEF2D	-7.58	12	-1.16	0.124	1357	0.921	0.876	16698	0.948	-0.349	0.91
SEC24C	-7.56	12	-1.15	0.124	1364	0.921	0.876	16691	0.947	-0.313	0.91
PRICKLE3	-7.57	12	-1.15	0.124	1359	0.921	0.876	16696	0.947	-0.274	0.91
LCOR	-7.57	12	-1.15	0.124	1361	0.921	0.876	16694	0.947	-0.312	0.91
WBSCR17	-7.57	12	-1.15	0.124	1362	0.921	0.876	16693	0.947	-0.048	0.91
GPATCH1	-7.58	12	-1.16	0.124	1358	0.921	0.876	16697	0.948	-0.411	0.91
ESPN	-7.57	12	-1.15	0.124	1360	0.921	0.876	16695	0.947	-0.229	0.91
NFKBIB	-7.56	12	-1.15	0.124	1363	0.921	0.876	16692	0.947	-0.105	0.91
SYBU	-7.55	12	-1.15	0.125	1365	0.921	0.875	16690	0.947	-0.26	0.9
LIMS1	-7.53	12	-1.15	0.125	1373	0.921	0.875	16682	0.947	-0.615	0.9
BUB1B	-7.54	12	-1.15	0.125	1367	0.921	0.875	16688	0.947	-0.505	0.9
U2AF1L4	-7.55	12	-1.15	0.125	1366	0.921	0.875	16689	0.947	-0.344	0.9
PRDM13	-7.54	12	-1.15	0.125	1368	0.921	0.875	16687	0.947	-0.218	0.9
BHLHE22	-7.54	12	-1.15	0.125	1369	0.921	0.875	16686	0.947	-0.369	0.9
UBAC1	-6.52	9	-1.15	0.125	1371	0.921	0.875	16684	0.947	-0.18	0.9
GP2	-7.53	12	-1.15	0.125	1374	0.921	0.875	16681	0.947	-0.268	0.9
TTC14	-7.54	12	-1.15	0.125	1370	0.921	0.875	16685	0.947	-0.286	0.9
SMG8	-7.53	12	-1.15	0.125	1375	0.921	0.875	16680	0.947	-0.494	0.9
RNF126	-7.52	12	-1.15	0.126	1377	0.921	0.874	16678	0.946	-0.261	0.9
SNAPC2	-7.5	12	-1.14	0.126	1389	0.921	0.874	16666	0.946	-0.302	0.9
SIRPA	-7.52	12	-1.15	0.126	1376	0.921	0.874	16679	0.947	-0.32	0.9
HOOK3	-7.53	12	-1.15	0.125	1372	0.921	0.875	16683	0.947	-0.212	0.9
NOTO	-7.52	12	-1.15	0.126	1378	0.921	0.874	16677	0.946	-0.15	0.9
GABPA	-7.51	12	-1.15	0.126	1382	0.921	0.874	16673	0.946	-0.049	0.9
FBXL12	-7.49	12	-1.14	0.127	1391	0.921	0.873	16664	0.946	-0.372	0.9
TMEM238	-7.51	12	-1.15	0.126	1381	0.921	0.874	16674	0.946	-0.179	0.9
C11orf68	-7.46	12	-1.14	0.128	1400	0.921	0.872	16655	0.945	-0.447	0.89
TLCD2	-7.48	12	-1.14	0.127	1394	0.921	0.873	16661	0.946	-0.319	0.9
SLC6A16	-7.5	12	-1.14	0.126	1385	0.921	0.874	16670	0.946	-0.328	0.9
SLC25A1	-7.51	12	-1.15	0.126	1380	0.921	0.874	16675	0.946	-0.365	0.9
POFUT2	-7.48	12	-1.14	0.127	1396	0.921	0.873	16659	0.946	-0.388	0.9
C9orf40	-7.5	12	-1.14	0.126	1390	0.921	0.874	16665	0.946	-0.242	0.9
SERTAD3	-7.51	12	-1.14	0.126	1383	0.921	0.874	16672	0.946	-0.027	0.9
HR	-7.5	12	-1.14	0.126	1388	0.921	0.874	16667	0.946	-0.191	0.9
CBX1	-7.5	12	-1.14	0.126	1386	0.921	0.874	16669	0.946	-0.364	0.9
PPP2R5D	-7.51	12	-1.15	0.126	1379	0.921	0.874	16676	0.946	-0.324	0.9
MBD1	-7.49	12	-1.14	0.127	1393	0.921	0.873	16662	0.946	-0.338	0.9
RTN2	-7.49	12	-1.14	0.127	1392	0.921	0.873	16663	0.946	-0.298	0.9
CCDC59	-7.5	12	-1.14	0.126	1384	0.921	0.874	16671	0.946	-0.437	0.9
SHISA7	-7.5	12	-1.14	0.126	1387	0.921	0.874	16668	0.946	-0.275	0.9
CCNE2	-7.48	12	-1.14	0.127	1395	0.921	0.873	16660	0.946	-0.526	0.9
MRPS5	-7.47	12	-1.14	0.127	1397	0.921	0.873	16658	0.946	-0.034	0.9
TBX18	-7.45	12	-1.14	0.128	1402	0.921	0.872	16653	0.945	-0.26	0.89
YTHDF1	-7.46	12	-1.14	0.128	1398	0.921	0.872	16657	0.946	-0.201	0.89
SRSF1	-7.46	12	-1.14	0.128	1399	0.921	0.872	16656	0.946	-0.61	0.89
DOCK5	-7.44	12	-1.13	0.128	1406	0.921	0.872	16649	0.945	-0.51	0.89
PTK6	-7.44	12	-1.13	0.128	1405	0.921	0.872	16650	0.945	-0.269	0.89
ZDHHC5	-7.45	12	-1.14	0.128	1401	0.921	0.872	16654	0.945	-0.405	0.89
LIN28B	-7.43	12	-1.13	0.128	1408	0.921	0.872	16647	0.945	-0.165	0.89
POLN	-7.42	12	-1.13	0.129	1416	0.921	0.871	16639	0.945	-0.318	0.89
CD247	-7.44	12	-1.13	0.128	1404	0.921	0.872	16651	0.945	-0.147	0.89
TLDC1	-7.42	12	-1.13	0.129	1414	0.921	0.871	16641	0.945	-0.14	0.89
YIPF6	-7.44	12	-1.14	0.128	1403	0.921	0.872	16652	0.945	-0.531	0.89
SUGT1	-7.43	12	-1.13	0.129	1411	0.921	0.871	16644	0.945	-0.566	0.89
BCL2L12	-7.43	12	-1.13	0.129	1412	0.921	0.871	16643	0.945	-0.24	0.89
PAFAH1B1	-7.42	12	-1.13	0.129	1417	0.921	0.871	16638	0.945	-0.545	0.89
SFXN2	-7.43	12	-1.13	0.129	1409	0.921	0.871	16646	0.945	-0.242	0.89
KIF22	-7.42	12	-1.13	0.129	1415	0.921	0.871	16640	0.945	-0.245	0.89
TMEM213	-7.43	12	-1.13	0.129	1410	0.921	0.871	16645	0.945	-0.421	0.89
HLX	-7.4	12	-1.13	0.13	1420	0.921	0.87	16635	0.945	-0.37	0.89
TPM4	-7.44	12	-1.13	0.128	1407	0.921	0.872	16648	0.945	-0.285	0.89
RPAP2	-7.42	12	-1.13	0.129	1413	0.921	0.871	16642	0.945	-0.421	0.89
ATG14	-7.41	12	-1.13	0.129	1418	0.921	0.871	16637	0.945	-0.174	0.89
LITAF	-7.41	12	-1.13	0.129	1419	0.921	0.871	16636	0.945	-0.25	0.89
LRRC47	-7.39	12	-1.13	0.13	1423	0.921	0.87	16632	0.944	-0.237	0.89
CCDC64B	-7.38	12	-1.12	0.13	1431	0.921	0.87	16624	0.944	-0.235	0.89
NDOR1	-7.38	12	-1.12	0.13	1428	0.921	0.87	16627	0.944	-1.054	0.89
PPP2R1A	-7.37	12	-1.12	0.131	1435	0.921	0.869	16620	0.944	-0.496	0.88
MYO1C	-7.39	12	-1.13	0.13	1422	0.921	0.87	16633	0.944	-0.284	0.89
CDKN2C	-7.38	12	-1.13	0.13	1426	0.921	0.87	16629	0.944	-0.343	0.89
TCEA2	-7.38	12	-1.13	0.13	1424	0.921	0.87	16631	0.944	-0.27	0.89
FOXE3	-7.37	12	-1.12	0.131	1434	0.921	0.869	16621	0.944	-0.198	0.88
WISP2	-7.38	12	-1.12	0.13	1429	0.921	0.87	16626	0.944	-0.27	0.89
COL1A1	-7.37	12	-1.12	0.131	1436	0.921	0.869	16619	0.944	-0.551	0.88
VCL	-7.38	12	-1.12	0.13	1430	0.921	0.87	16625	0.944	-0.412	0.89
C7orf49	-7.37	12	-1.12	0.131	1438	0.921	0.869	16617	0.944	-0.511	0.88
PHOX2B	-7.37	12	-1.12	0.131	1440	0.921	0.869	16615	0.944	-0.486	0.88
PROSER2	-7.38	12	-1.13	0.13	1425	0.921	0.87	16630	0.944	-0.173	0.89
CRIPT	-5.21	6	-1.12	0.131	1433	0.921	0.869	16622	0.944	-0.003	0.88
RASSF1	-7.39	12	-1.13	0.13	1421	0.921	0.87	16634	0.944	-0.394	0.89
KLK6	-7.37	12	-1.12	0.131	1437	0.921	0.869	16618	0.944	-0.299	0.88
PFDN6	-7.37	12	-1.12	0.131	1439	0.921	0.869	16616	0.944	-0.289	0.88
GUCY2D	-7.36	12	-1.12	0.131	1442	0.921	0.869	16613	0.944	-0.11	0.88
FAM114A1	-7.36	12	-1.12	0.131	1445	0.921	0.869	16610	0.944	-0.377	0.88
MLLT6	-7.36	12	-1.12	0.131	1443	0.921	0.869	16612	0.944	-0.322	0.88
GUCD1	-7.37	12	-1.12	0.131	1441	0.921	0.869	16614	0.944	-0.252	0.88
MAGEB17	-7.38	12	-1.12	0.13	1427	0.921	0.87	16628	0.944	-0.204	0.89
CHMP6	-6.39	9	-1.12	0.131	1432	0.921	0.869	16623	0.944	-0.09	0.88
MRPL47	-7.36	12	-1.12	0.131	1446	0.921	0.869	16609	0.944	-0.237	0.88
EFNA3	-7.36	12	-1.12	0.131	1444	0.921	0.869	16611	0.944	-0.204	0.88
RPS6KB1	-7.34	12	-1.12	0.132	1447	0.921	0.868	16608	0.944	-0.261	0.88
FBRSL1	-7.33	12	-1.12	0.132	1449	0.921	0.868	16606	0.944	-0.126	0.88
GRIN3B	-7.34	12	-1.12	0.132	1448	0.921	0.868	16607	0.944	-0.206	0.88
F2R	-7.33	12	-1.12	0.132	1450	0.921	0.868	16605	0.944	-0.257	0.88
SCD	-7.32	12	-1.12	0.132	1451	0.921	0.868	16604	0.943	-0.234	0.88
SLPI	-7.3	12	-1.11	0.133	1459	0.921	0.867	16596	0.943	-0.086	0.88
CDC42	-6.34	9	-1.11	0.132	1452	0.921	0.868	16603	0.943	-1.174	0.88
LDB3	-7.31	12	-1.11	0.133	1456	0.921	0.867	16599	0.943	-0.298	0.88
GZMM	-7.31	12	-1.11	0.133	1458	0.921	0.867	16597	0.943	-0.221	0.88
E2F7	-7.31	12	-1.11	0.133	1457	0.921	0.867	16598	0.943	-0.425	0.88
COL9A2	-7.3	12	-1.11	0.133	1463	0.921	0.867	16592	0.943	-0.299	0.88
SNAI3	-7.32	12	-1.11	0.132	1453	0.921	0.868	16602	0.943	-0.081	0.88
HYAL3	-7.3	12	-1.11	0.133	1460	0.921	0.867	16595	0.943	-0.2	0.88
TTC18	-7.29	12	-1.11	0.133	1465	0.921	0.867	16590	0.943	-0.12	0.88
SLC52A3	-7.32	12	-1.11	0.133	1454	0.921	0.867	16601	0.943	-0.34	0.88
NCOA5	-7.29	12	-1.11	0.133	1464	0.921	0.867	16591	0.943	-0.25	0.88
MPC1	-7.3	12	-1.11	0.133	1462	0.921	0.867	16593	0.943	-0.364	0.88
MAGEC3	-7.24	12	-1.1	0.135	1484	0.921	0.865	16571	0.942	-0.174	0.87
PEA15	-7.27	12	-1.11	0.134	1476	0.921	0.866	16579	0.943	-0.261	0.87
PNPLA2	-7.3	12	-1.11	0.133	1461	0.921	0.867	16594	0.943	-0.311	0.88
BACH1	-7.29	12	-1.11	0.133	1466	0.921	0.867	16589	0.943	-0.039	0.88
GCHFR	-6.97	11	-1.11	0.134	1469	0.921	0.866	16586	0.943	-0.494	0.87
HMG20A	-7.31	12	-1.11	0.133	1455	0.921	0.867	16600	0.943	-0.234	0.88
EXOC3	-7.28	12	-1.11	0.134	1467	0.921	0.866	16588	0.943	-0.306	0.87
CPT1C	-7.28	12	-1.11	0.134	1470	0.921	0.866	16585	0.943	-0.3	0.87
C22orf23	-7.28	12	-1.11	0.134	1468	0.921	0.866	16587	0.943	-0.413	0.87
CHST4	-7.27	12	-1.11	0.134	1471	0.921	0.866	16584	0.943	-0.182	0.87
C19orf45	-7.27	12	-1.11	0.134	1474	0.921	0.866	16581	0.943	-0.458	0.87
NFKBIL1	-7.27	12	-1.11	0.134	1475	0.921	0.866	16580	0.943	-0.025	0.87
P2RX7	-7.27	12	-1.11	0.134	1472	0.921	0.866	16583	0.943	-0.419	0.87
LIPE	-7.26	12	-1.11	0.135	1479	0.921	0.865	16576	0.943	-0.271	0.87
ACTR1A	-7.25	12	-1.1	0.135	1481	0.921	0.865	16574	0.942	-0.489	0.87
DLX2	-7.27	12	-1.11	0.134	1473	0.921	0.866	16582	0.943	-0.262	0.87
INHBE	-7.25	12	-1.1	0.135	1482	0.921	0.865	16573	0.942	-0.196	0.87
GUCA1A	-7.26	12	-1.11	0.134	1478	0.921	0.866	16577	0.943	-0.204	0.87
PAK4	-6.28	9	-1.1	0.135	1480	0.921	0.865	16575	0.942	-0.186	0.87
ADRB1	-7.24	12	-1.1	0.135	1483	0.921	0.865	16572	0.942	-0.315	0.87
HDLBP	-7.24	12	-1.1	0.135	1488	0.921	0.865	16567	0.942	-0.328	0.87
TXNL4A	-7.23	12	-1.1	0.135	1489	0.921	0.865	16566	0.942	-0.869	0.87
OTOS	-7.23	12	-1.1	0.136	1491	0.921	0.864	16564	0.942	-0.298	0.87
DRGX	-7.26	12	-1.11	0.134	1477	0.921	0.866	16578	0.943	-0.273	0.87
RASL10B	-7.23	12	-1.1	0.136	1490	0.921	0.864	16565	0.942	-0.261	0.87
ZNF638	-7.24	12	-1.1	0.135	1485	0.921	0.865	16570	0.942	-0.36	0.87
SCXA	-7.24	12	-1.1	0.135	1486	0.921	0.865	16569	0.942	-0.276	0.87
TACC3	-7.23	12	-1.1	0.136	1492	0.921	0.864	16563	0.942	-0.059	0.87
B3GNT6	-7.21	12	-1.1	0.136	1497	0.921	0.864	16558	0.942	-0.309	0.87
GLTP	-7.21	12	-1.1	0.136	1498	0.921	0.864	16557	0.942	-0.339	0.87
SCAMP2	-7.22	12	-1.1	0.136	1493	0.921	0.864	16562	0.942	-0.225	0.87
TNFSF12	-7.24	12	-1.1	0.135	1487	0.921	0.865	16568	0.942	-0.159	0.87
NDUFB8	-7.21	12	-1.1	0.136	1495	0.921	0.864	16560	0.942	-0.225	0.87
THOC2	-7.2	12	-1.1	0.137	1502	0.921	0.863	16553	0.942	-0.528	0.86
POU2F2	-7.21	12	-1.1	0.136	1496	0.921	0.864	16559	0.942	-0.201	0.87
FAM64A	-7.2	12	-1.1	0.137	1504	0.921	0.863	16551	0.942	-0.305	0.86
GZF1	-7.19	12	-1.09	0.137	1507	0.921	0.863	16548	0.942	-0.399	0.86
HOXA4	-7.2	12	-1.1	0.136	1501	0.921	0.864	16554	0.942	-0.039	0.87
ZNF575	-7.2	12	-1.1	0.137	1503	0.921	0.863	16552	0.942	-0.165	0.86
PRRX2	-7.21	12	-1.1	0.136	1499	0.921	0.864	16556	0.942	-0.405	0.87
MSN	-7.22	12	-1.1	0.136	1494	0.921	0.864	16561	0.942	-0.115	0.87
EID2	-7.21	12	-1.1	0.136	1500	0.921	0.864	16555	0.942	-0.265	0.87
RAD54L2	-7.19	12	-1.09	0.137	1505	0.921	0.863	16550	0.942	-0.329	0.86
ADIPOR1	-7.19	12	-1.09	0.137	1506	0.921	0.863	16549	0.942	-0.228	0.86
TNFRSF1B	-7.18	12	-1.09	0.137	1512	0.921	0.863	16543	0.942	-0.347	0.86
ZFP36L2	-7.15	12	-1.09	0.138	1523	0.921	0.862	16532	0.941	-0.229	0.86
ITGB5	-7.18	12	-1.09	0.137	1509	0.921	0.863	16546	0.942	-0.361	0.86
ALDH5A1	-7.18	12	-1.09	0.137	1510	0.921	0.863	16545	0.942	-0.319	0.86
ANKLE1	-7.18	12	-1.09	0.137	1508	0.921	0.863	16547	0.942	-0.189	0.86
SF3B5	-7.18	12	-1.09	0.137	1511	0.921	0.863	16544	0.942	-0.646	0.86
PAN2	-7.18	12	-1.09	0.137	1513	0.921	0.863	16542	0.941	-0.465	0.86
TMEM66	-7.16	12	-1.09	0.138	1518	0.921	0.862	16537	0.941	-0.347	0.86
GFER	-7.16	12	-1.09	0.138	1516	0.921	0.862	16539	0.941	-0.164	0.86
SCAF1	-7.15	12	-1.09	0.138	1522	0.921	0.862	16533	0.941	-0.145	0.86
CACNA2D4	-7.17	12	-1.09	0.138	1515	0.921	0.862	16540	0.941	-0.228	0.86
MGAT1	-7.16	12	-1.09	0.138	1517	0.921	0.862	16538	0.941	-0.301	0.86
CDKN2D	-7.16	12	-1.09	0.138	1519	0.921	0.862	16536	0.941	-0.256	0.86
TSKU	-7.16	12	-1.09	0.138	1520	0.921	0.862	16535	0.941	-0.331	0.86
WWP2	-7.14	12	-1.09	0.139	1527	0.921	0.861	16528	0.941	-0.305	0.86
WDR13	-7.15	12	-1.09	0.138	1524	0.921	0.862	16531	0.941	-0.313	0.86
TACC1	-7.17	12	-1.09	0.138	1514	0.921	0.862	16541	0.941	-0.349	0.86
CCNI2	-7.15	12	-1.09	0.138	1525	0.921	0.862	16530	0.941	-0.344	0.86
CHAT	-7.15	12	-1.09	0.138	1521	0.921	0.862	16534	0.941	-0.247	0.86
SLC6A8	-7.14	12	-1.09	0.138	1526	0.921	0.862	16529	0.941	-0.096	0.86
TICAM1	-7.13	12	-1.09	0.139	1529	0.921	0.861	16526	0.941	-0.166	0.86
GCLC	-7.14	12	-1.09	0.139	1528	0.921	0.861	16527	0.941	-0.35	0.86
HDAC2	-7.13	12	-1.08	0.139	1530	0.921	0.861	16525	0.941	-0.581	0.86
FOXQ1	-7.13	12	-1.08	0.139	1531	0.921	0.861	16524	0.941	-0.196	0.86
SMARCA5	-7.12	12	-1.08	0.139	1535	0.921	0.861	16520	0.941	-0.259	0.86
ATP6AP1	-7.12	12	-1.08	0.139	1533	0.921	0.861	16522	0.941	-0.206	0.86
PCSK4	-6.17	9	-1.08	0.139	1534	0.921	0.861	16521	0.941	-0.19	0.86
SHCBP1L	-7.11	12	-1.08	0.14	1537	0.921	0.86	16518	0.94	-0.157	0.85
PIGA	-7.09	12	-1.08	0.14	1545	0.921	0.86	16510	0.94	-0.295	0.85
SLC45A4	-7.12	12	-1.08	0.139	1536	0.921	0.861	16519	0.94	-0.498	0.86
C1QTNF7	-7.1	12	-1.08	0.14	1541	0.921	0.86	16514	0.94	-0.331	0.85
TMEM11	-7.11	12	-1.08	0.14	1539	0.921	0.86	16516	0.94	-0.319	0.85
CDHR5	-7.11	12	-1.08	0.14	1538	0.921	0.86	16517	0.94	-0.247	0.85
PRAP1	-7.1	12	-1.08	0.14	1544	0.921	0.86	16511	0.94	-0.219	0.85
AGTRAP	-7.1	12	-1.08	0.14	1540	0.921	0.86	16515	0.94	-0.034	0.85
HIST3H2BB	-7.1	12	-1.08	0.14	1542	0.921	0.86	16513	0.94	-0.385	0.85
COX7C	-7.09	12	-1.08	0.141	1548	0.921	0.859	16507	0.94	-0.374	0.85
JPH1	-7.1	12	-1.08	0.14	1543	0.921	0.86	16512	0.94	-0.417	0.85
SKOR1	-7.13	12	-1.08	0.139	1532	0.921	0.861	16523	0.941	-0.111	0.86
RNF222	-7.09	12	-1.08	0.14	1547	0.921	0.86	16508	0.94	-0.349	0.85
PDAP1	-7.08	12	-1.08	0.141	1552	0.921	0.859	16503	0.94	-0.564	0.85
TBXA2R	-7.08	12	-1.08	0.141	1551	0.921	0.859	16504	0.94	-0.098	0.85
MFSD7	-7.06	12	-1.07	0.141	1558	0.921	0.859	16497	0.94	-0.315	0.85
CAPN5	-7.08	12	-1.08	0.141	1549	0.921	0.859	16506	0.94	-0.236	0.85
MAP2K5	-7.09	12	-1.08	0.14	1546	0.921	0.86	16509	0.94	-0.318	0.85
CCM2L	-7.07	12	-1.07	0.141	1557	0.921	0.859	16498	0.94	-0.209	0.85
FAM109B	-6.13	9	-1.08	0.141	1553	0.921	0.859	16502	0.94	-0.442	0.85
SCAMP4	-7.08	12	-1.08	0.141	1550	0.921	0.859	16505	0.94	-0.228	0.85
MAT2B	-7.07	12	-1.08	0.141	1554	0.921	0.859	16501	0.94	-0.182	0.85
FAM131B	-7.07	12	-1.07	0.141	1555	0.921	0.859	16500	0.94	-0.309	0.85
TTF1	-7.05	12	-1.07	0.142	1567	0.921	0.858	16488	0.939	-0.325	0.85
PRPF8	-7.06	12	-1.07	0.141	1559	0.921	0.859	16496	0.94	-0.828	0.85
PCDHGB3	-7.05	12	-1.07	0.142	1563	0.921	0.858	16492	0.939	-0.347	0.85
PSEN1	-7.05	12	-1.07	0.142	1561	0.921	0.858	16494	0.939	-0.34	0.85
BCAR1	-7.05	12	-1.07	0.142	1562	0.921	0.858	16493	0.939	-0.353	0.85
SMAD3	-7.05	12	-1.07	0.142	1570	0.921	0.858	16485	0.939	-0.321	0.85
SYMPK	-7.07	12	-1.07	0.141	1556	0.921	0.859	16499	0.94	-0.491	0.85
CARNS1	-7.04	12	-1.07	0.142	1571	0.921	0.858	16484	0.939	-0.158	0.85
FEZF1	-7.05	12	-1.07	0.142	1564	0.921	0.858	16491	0.939	-0.236	0.85
NCKAP1	-7.04	12	-1.07	0.142	1576	0.921	0.858	16479	0.939	-0.283	0.85
APOE	-7.05	12	-1.07	0.142	1566	0.921	0.858	16489	0.939	-0.211	0.85
TACSTD2	-7.04	12	-1.07	0.142	1573	0.921	0.858	16482	0.939	-0.221	0.85
CPZ	-7.05	12	-1.07	0.142	1565	0.921	0.858	16490	0.939	-0.126	0.85
CDSN	-7.05	12	-1.07	0.142	1569	0.921	0.858	16486	0.939	-0.208	0.85
CDT1	-7	12	-1.06	0.144	1596	0.921	0.856	16459	0.939	-0.597	0.84
C2orf71	-7.06	12	-1.07	0.142	1560	0.921	0.858	16495	0.94	-0.123	0.85
UBXN1	-7.04	12	-1.07	0.142	1575	0.921	0.858	16480	0.939	-0.228	0.85
DRD4	-7.03	12	-1.07	0.142	1579	0.921	0.858	16476	0.939	-0.193	0.85
CTNNB1	-7.04	12	-1.07	0.142	1574	0.921	0.858	16481	0.939	-0.348	0.85
RPUSD2	-7.05	12	-1.07	0.142	1568	0.921	0.858	16487	0.939	-0.245	0.85
SYNDIG1L	-7.03	12	-1.07	0.142	1578	0.921	0.858	16477	0.939	-0.243	0.85
CPSF6	-6.43	10	-1.07	0.142	1572	0.921	0.858	16483	0.939	-0.217	0.85
NAT16	-7.01	12	-1.07	0.143	1588	0.921	0.857	16467	0.939	-0.182	0.84
FLYWCH1	-7.03	12	-1.07	0.142	1577	0.921	0.858	16478	0.939	-0.224	0.85
NAA50	-7.02	12	-1.07	0.143	1582	0.921	0.857	16473	0.939	-0.415	0.84
USP8	-7.03	12	-1.07	0.143	1581	0.921	0.857	16474	0.939	-0.424	0.84
NKX2-3	-7.02	12	-1.07	0.143	1583	0.921	0.857	16472	0.939	-0.633	0.84
IRF7	-7.01	12	-1.06	0.143	1592	0.921	0.857	16463	0.939	-0.196	0.84
CNOT2	-7.02	12	-1.07	0.143	1585	0.921	0.857	16470	0.939	-0.644	0.84
DOK1	-7.02	12	-1.07	0.143	1584	0.921	0.857	16471	0.939	-0.092	0.84
ZNF556	-7.01	12	-1.07	0.143	1586	0.921	0.857	16469	0.939	-0.142	0.84
LAG3	-7	12	-1.06	0.144	1594	0.921	0.856	16461	0.939	-0.178	0.84
FANCA	-7.01	12	-1.07	0.143	1591	0.921	0.857	16464	0.939	-0.357	0.84
ZNF823	-7	12	-1.06	0.144	1602	0.921	0.856	16453	0.939	-0.381	0.84
MADCAM1	-7.01	12	-1.07	0.143	1590	0.921	0.857	16465	0.939	-0.239	0.84
MRPL51	-7	12	-1.06	0.144	1603	0.921	0.856	16452	0.939	-0.416	0.84
LYPD3	-7	12	-1.06	0.144	1600	0.921	0.856	16455	0.939	-0.121	0.84
PSMB11	-7.01	12	-1.07	0.143	1587	0.921	0.857	16468	0.939	-0.344	0.84
PET112	-7	12	-1.06	0.144	1595	0.921	0.856	16460	0.939	-0.257	0.84
TIE1	-7	12	-1.06	0.143	1593	0.921	0.857	16462	0.939	-0.086	0.84
FOXD1	-6.99	12	-1.06	0.144	1606	0.921	0.856	16449	0.939	-0.175	0.84
ZNF579	-7	12	-1.06	0.144	1597	0.921	0.856	16458	0.939	-0.467	0.84
KIF23	-7	12	-1.06	0.144	1601	0.921	0.856	16454	0.939	-0.431	0.84
RHPN1	-7.01	12	-1.07	0.143	1589	0.921	0.857	16466	0.939	-0.215	0.84
PKNOX1	-7	12	-1.06	0.144	1604	0.921	0.856	16451	0.939	-0.223	0.84
HSD17B4	-6.96	12	-1.06	0.145	1621	0.921	0.855	16434	0.939	-0.253	0.84
CREB1	-6.98	12	-1.06	0.144	1609	0.921	0.856	16446	0.939	-0.104	0.84
RTN4RL1	-6.98	12	-1.06	0.144	1607	0.921	0.856	16448	0.939	-0.277	0.84
PMAIP1	-7	12	-1.06	0.144	1599	0.921	0.856	16456	0.939	-0.17	0.84
AMDHD2	-6.98	12	-1.06	0.144	1608	0.921	0.856	16447	0.939	-0.219	0.84
GTF2H3	-6.98	12	-1.06	0.145	1610	0.921	0.855	16445	0.939	-0.617	0.84
DUSP15	-6.97	12	-1.06	0.145	1613	0.921	0.855	16442	0.939	-0.322	0.84
TRMT12	-6.98	12	-1.06	0.145	1611	0.921	0.855	16444	0.939	-0.04	0.84
ALKBH7	-6.96	12	-1.06	0.145	1618	0.921	0.855	16437	0.939	-0.398	0.84
WNT4	-6.99	12	-1.06	0.144	1605	0.921	0.856	16450	0.939	-0.252	0.84
ACTR2	-6.97	12	-1.06	0.145	1612	0.921	0.855	16443	0.939	-0.384	0.84
POC1B	-6.97	12	-1.06	0.145	1615	0.921	0.855	16440	0.939	-0.251	0.84
LSM3	-6.96	12	-1.06	0.145	1620	0.921	0.855	16435	0.939	-0.985	0.84
EIF2AK2	-6.97	12	-1.06	0.145	1614	0.921	0.855	16441	0.939	-0.275	0.84
ROGDI	-6.95	12	-1.06	0.145	1623	0.921	0.855	16432	0.939	-0.295	0.84
TSACC	-6.03	9	-1.06	0.145	1617	0.921	0.855	16438	0.939	-0.256	0.84
AUP1	-6.94	12	-1.05	0.146	1626	0.921	0.854	16429	0.939	-0.366	0.84
INPP5A	-6.94	12	-1.05	0.146	1628	0.921	0.854	16427	0.939	-0.221	0.84
OTUD3	-6.96	12	-1.06	0.145	1616	0.921	0.855	16439	0.939	-0.512	0.84
SERBP1	-6.95	12	-1.06	0.145	1622	0.921	0.855	16433	0.939	-0.331	0.84
PCMTD2	-6.95	12	-1.06	0.145	1624	0.921	0.855	16431	0.939	-0.197	0.84
KLF10	-6.96	12	-1.06	0.145	1619	0.921	0.855	16436	0.939	-0.362	0.84
HDAC1	-6.94	12	-1.05	0.146	1627	0.921	0.854	16428	0.939	-0.311	0.84
APEH	-6.95	12	-1.06	0.146	1625	0.921	0.854	16430	0.939	-0.309	0.84
OR10G4	-6.93	12	-1.05	0.146	1629	0.921	0.854	16426	0.939	-0.445	0.84
ZNF630	-6.89	12	-1.05	0.147	1641	0.921	0.853	16414	0.938	0.019	0.83
PYGO2	-6.91	12	-1.05	0.147	1633	0.921	0.853	16422	0.938	-0.086	0.83
SLC6A12	-6.92	12	-1.05	0.147	1631	0.921	0.853	16424	0.938	-0.337	0.83
ZNF185	-6.91	12	-1.05	0.147	1634	0.921	0.853	16421	0.938	-0.36	0.83
ADNP2	-6.91	12	-1.05	0.147	1635	0.921	0.853	16420	0.938	-0.425	0.83
SPATS1	-6.89	12	-1.05	0.148	1643	0.921	0.852	16412	0.938	-0.045	0.83
SLC17A7	-6.9	12	-1.05	0.147	1638	0.921	0.853	16417	0.938	-0.294	0.83
RIPPLY2	-6.91	12	-1.05	0.147	1636	0.921	0.853	16419	0.938	-0.199	0.83
FAM83F	-6.9	12	-1.05	0.147	1639	0.921	0.853	16416	0.938	-0.087	0.83
C17orf100	-6.89	12	-1.05	0.148	1644	0.921	0.852	16411	0.938	0.038	0.83
PAQR4	-6.92	12	-1.05	0.146	1630	0.921	0.854	16425	0.938	0.029	0.84
ATP10A	-6.9	12	-1.05	0.147	1637	0.921	0.853	16418	0.938	-0.059	0.83
TUBGCP2	-6.91	12	-1.05	0.147	1632	0.921	0.853	16423	0.938	-0.389	0.83
FAM136A	-5.97	9	-1.05	0.147	1642	0.921	0.853	16413	0.938	-0.275	0.83
SLC47A1	-6.9	12	-1.05	0.147	1640	0.921	0.853	16415	0.938	-0.269	0.83
C9orf66	-6.89	12	-1.05	0.148	1645	0.921	0.852	16410	0.938	-0.208	0.83
SHROOM2	-6.89	12	-1.05	0.148	1646	0.921	0.852	16409	0.938	-0.058	0.83
TAF15	-5.96	9	-1.05	0.148	1648	0.921	0.852	16407	0.938	-0.291	0.83
GLI4	-6.88	12	-1.05	0.148	1647	0.921	0.852	16408	0.938	-0.076	0.83
PEX26	-6.87	12	-1.04	0.148	1649	0.921	0.852	16406	0.937	-0.378	0.83
SYCE3	-6.87	12	-1.04	0.149	1650	0.921	0.851	16405	0.937	-0.556	0.83
SSB	-6.85	12	-1.04	0.149	1655	0.921	0.851	16400	0.937	-0.534	0.83
ALX4	-6.86	12	-1.04	0.149	1653	0.921	0.851	16402	0.937	-0.271	0.83
RPA2	-6.84	12	-1.04	0.149	1660	0.921	0.851	16395	0.937	-0.604	0.83
MARVELD3	-6.84	12	-1.04	0.15	1661	0.921	0.85	16394	0.937	-0.201	0.82
SPTBN4	-6.83	12	-1.04	0.15	1662	0.921	0.85	16393	0.936	-0.189	0.82
OR10Q1	-6.84	12	-1.04	0.149	1659	0.921	0.851	16396	0.937	-0.23	0.83
HAL	-5.91	9	-1.04	0.15	1664	0.921	0.85	16391	0.936	-0.039	0.82
RGS11	-6.83	12	-1.04	0.15	1667	0.921	0.85	16388	0.936	-0.183	0.82
HIST1H1C	-6.85	12	-1.04	0.149	1654	0.921	0.851	16401	0.937	-0.193	0.83
KDM1B	-6.86	12	-1.04	0.149	1651	0.921	0.851	16404	0.937	-0.389	0.83
ECSIT	-6.85	12	-1.04	0.149	1657	0.921	0.851	16398	0.937	-0.181	0.83
CHMP7	-6.86	12	-1.04	0.149	1652	0.921	0.851	16403	0.937	-0.204	0.83
CEACAM1	-6.83	12	-1.04	0.15	1666	0.921	0.85	16389	0.936	0.056	0.82
CCDC94	-6.81	12	-1.03	0.151	1673	0.921	0.849	16382	0.936	-0.523	0.82
SNAPC4	-6.85	12	-1.04	0.149	1656	0.921	0.851	16399	0.937	-0.087	0.83
SH2B1	-6.82	12	-1.03	0.15	1668	0.921	0.85	16387	0.936	-0.178	0.82
MEGF11	-6.83	12	-1.04	0.15	1665	0.921	0.85	16390	0.936	-0.372	0.82
CREB3L1	-6.84	12	-1.04	0.149	1658	0.921	0.851	16397	0.937	-0.365	0.83
ZNF414	-6.81	12	-1.03	0.151	1674	0.921	0.849	16381	0.936	-0.45	0.82
PRRC2A	-6.81	12	-1.03	0.151	1670	0.921	0.849	16385	0.936	-0.287	0.82
TOB1	-6.83	12	-1.04	0.15	1663	0.921	0.85	16392	0.936	-0.555	0.82
RNF31	-6.81	12	-1.03	0.151	1672	0.921	0.849	16383	0.936	-0.243	0.82
MAFA	-6.81	12	-1.03	0.151	1675	0.921	0.849	16380	0.936	-0.586	0.82
IGSF8	-6.79	12	-1.03	0.151	1684	0.921	0.849	16371	0.936	-0.292	0.82
CDK18	-6.81	12	-1.03	0.15	1669	0.921	0.85	16386	0.936	-0.445	0.82
LZTS1	-6.8	12	-1.03	0.151	1680	0.921	0.849	16375	0.936	-0.277	0.82
RAB40B	-6.81	12	-1.03	0.151	1676	0.921	0.849	16379	0.936	-0.143	0.82
ENTPD6	-6.79	12	-1.03	0.151	1683	0.921	0.849	16372	0.936	-0.306	0.82
RCOR1	-6.8	12	-1.03	0.151	1677	0.921	0.849	16378	0.936	-0.374	0.82
KRT12	-6.77	12	-1.03	0.152	1691	0.921	0.848	16364	0.936	-0.232	0.82
LPAR3	-6.8	12	-1.03	0.151	1679	0.921	0.849	16376	0.936	-0.047	0.82
USP10	-6.78	12	-1.03	0.152	1687	0.921	0.848	16368	0.936	-0.339	0.82
MLLT3	-6.8	12	-1.03	0.151	1678	0.921	0.849	16377	0.936	-0.268	0.82
C7orf41	-6.8	12	-1.03	0.151	1682	0.921	0.849	16373	0.936	-0.331	0.82
HNRNPA2B1	-6.81	12	-1.03	0.151	1671	0.921	0.849	16384	0.936	-0.282	0.82
PEAR1	-6.79	12	-1.03	0.152	1686	0.921	0.848	16369	0.936	-0.277	0.82
ZNRF4	-6.78	12	-1.03	0.152	1689	0.921	0.848	16366	0.936	-0.178	0.82
KIAA0196	-6.79	12	-1.03	0.152	1685	0.921	0.848	16370	0.936	-0.436	0.82
JMJD1C	-6.77	12	-1.03	0.152	1694	0.921	0.848	16361	0.935	-0.246	0.82
NRN1	-6.77	12	-1.03	0.152	1695	0.921	0.848	16360	0.935	-0.127	0.82
GPR146	-6.78	12	-1.03	0.152	1688	0.921	0.848	16367	0.936	-0.209	0.82
TUBA8	-6.76	12	-1.03	0.152	1696	0.921	0.848	16359	0.935	-0.453	0.82
NUP214	-6.75	12	-1.02	0.153	1703	0.921	0.847	16352	0.935	-0.634	0.82
NUCB1	-6.75	12	-1.02	0.153	1704	0.921	0.847	16351	0.935	-0.148	0.82
ERO1L	-6.78	12	-1.03	0.152	1690	0.921	0.848	16365	0.936	-0.144	0.82
HSD11B1L	-6.75	12	-1.02	0.153	1699	0.921	0.847	16356	0.935	-0.405	0.82
DIO3	-6.76	12	-1.03	0.152	1697	0.921	0.848	16358	0.935	-0.09	0.82
SLC16A8	-6.77	12	-1.03	0.152	1692	0.921	0.848	16363	0.936	-0.042	0.82
NFE2L3	-6.75	12	-1.02	0.153	1700	0.921	0.847	16355	0.935	-0.204	0.82
CDC40	-6.76	12	-1.03	0.153	1698	0.921	0.847	16357	0.935	-0.494	0.82
KIAA0247	-6.75	12	-1.02	0.153	1702	0.921	0.847	16353	0.935	-0.226	0.82
NDUFS8	-6.74	12	-1.02	0.153	1705	0.921	0.847	16350	0.935	-0.025	0.82
ATP5G1	-5.83	9	-1.02	0.153	1707	0.921	0.847	16348	0.935	-0.264	0.82
MCM3	-6.77	12	-1.03	0.152	1693	0.921	0.848	16362	0.935	-0.281	0.82
FAM65A	-6.73	12	-1.02	0.154	1710	0.921	0.846	16345	0.935	-0.378	0.81
HIGD1B	-6.75	12	-1.02	0.153	1701	0.921	0.847	16354	0.935	-0.21	0.82
FAM132A	-6.74	12	-1.02	0.153	1706	0.921	0.847	16349	0.935	-0.325	0.82
TOPBP1	-6.13	10	-1.02	0.154	1713	0.921	0.846	16342	0.935	-0.266	0.81
HMGCL	-6.73	12	-1.02	0.154	1711	0.921	0.846	16344	0.935	-0.153	0.81
MVP	-6.71	12	-1.02	0.154	1718	0.921	0.846	16337	0.934	-0.18	0.81
RTFDC1	-6.74	12	-1.02	0.153	1708	0.921	0.847	16347	0.935	-0.086	0.82
TMEM88	-6.72	12	-1.02	0.154	1714	0.921	0.846	16341	0.935	-0.336	0.81
CCDC9	-6.73	12	-1.02	0.154	1709	0.921	0.846	16346	0.935	-0.179	0.81
A1CF	-6.73	12	-1.02	0.154	1712	0.921	0.846	16343	0.935	-0.286	0.81
HLA-DQA2	-6.72	12	-1.02	0.154	1715	0.921	0.846	16340	0.935	-0.186	0.81
XRCC4	-6.71	12	-1.02	0.154	1717	0.921	0.846	16338	0.935	-0.504	0.81
RYR1	-6.71	12	-1.02	0.154	1719	0.921	0.846	16336	0.934	-0.237	0.81
RNF187	-6.71	12	-1.02	0.154	1716	0.921	0.846	16339	0.935	-0.384	0.81
MT3	-6.7	12	-1.02	0.155	1721	0.921	0.845	16334	0.934	-0.274	0.81
TOMM20L	-6.7	12	-1.02	0.155	1722	0.921	0.845	16333	0.934	-0.279	0.81
PEX12	-6.69	12	-1.01	0.155	1726	0.921	0.845	16329	0.934	-0.183	0.81
ONECUT3	-6.69	12	-1.01	0.155	1725	0.921	0.845	16330	0.934	-0.334	0.81
ZFYVE21	-6.7	12	-1.02	0.155	1720	0.921	0.845	16335	0.934	-0.2	0.81
BEND4	-6.7	12	-1.02	0.155	1723	0.921	0.845	16332	0.934	-0.055	0.81
EIF5AL1	-5.79	9	-1.01	0.155	1727	0.921	0.845	16328	0.934	-0.429	0.81
CXorf56	-6.69	12	-1.01	0.155	1724	0.921	0.845	16331	0.934	-0.356	0.81
C10orf54	-6.68	12	-1.01	0.156	1730	0.921	0.844	16325	0.934	-0.3	0.81
LENG9	-6.68	12	-1.01	0.155	1728	0.921	0.845	16327	0.934	-0.222	0.81
RASSF5	-6.67	12	-1.01	0.156	1732	0.921	0.844	16323	0.933	-0.207	0.81
CYGB	-6.68	12	-1.01	0.156	1729	0.921	0.844	16326	0.934	-0.19	0.81
PABPN1L	-6.65	12	-1.01	0.157	1734	0.921	0.843	16321	0.933	-0.225	0.8
GNB3	-6.65	12	-1.01	0.157	1740	0.921	0.843	16315	0.933	-0.285	0.8
ADAMTSL4-AS1	-6.67	12	-1.01	0.156	1731	0.921	0.844	16324	0.934	-0.185	0.81
ETV3L	-6.65	12	-1.01	0.157	1738	0.921	0.843	16317	0.933	-0.154	0.8
VGF	-6.65	12	-1.01	0.157	1737	0.921	0.843	16318	0.933	-0.304	0.8
TFPT	-6.65	12	-1.01	0.157	1733	0.921	0.843	16322	0.933	-0.214	0.8
RBL1	-6.65	12	-1.01	0.157	1735	0.921	0.843	16320	0.933	-0.451	0.8
TREX2	-6.64	12	-1.01	0.157	1742	0.921	0.843	16313	0.933	-0.097	0.8
COA5	-6.63	12	-1.01	0.157	1745	0.921	0.843	16310	0.933	-0.141	0.8
LAPTM5	-6.64	12	-1.01	0.157	1744	0.921	0.843	16311	0.933	-0.181	0.8
DVL2	-6.63	12	-1	0.158	1746	0.921	0.842	16309	0.933	-0.19	0.8
ZFP64	-6.65	12	-1.01	0.157	1739	0.921	0.843	16316	0.933	-0.305	0.8
DHX38	-6.63	12	-1	0.158	1747	0.921	0.842	16308	0.933	-0.241	0.8
DDB1	-6.62	12	-1	0.158	1750	0.921	0.842	16305	0.933	-0.781	0.8
BBC3	-6.65	12	-1.01	0.157	1736	0.921	0.843	16319	0.933	-0.216	0.8
MIPEP	-6.64	12	-1.01	0.157	1743	0.921	0.843	16312	0.933	-0.206	0.8
ENY2	-6.63	12	-1	0.158	1748	0.921	0.842	16307	0.933	-0.519	0.8
THOP1	-6.64	12	-1.01	0.157	1741	0.921	0.843	16314	0.933	-0.238	0.8
WHSC1L1	-6.62	12	-1	0.158	1752	0.921	0.842	16303	0.933	-0.282	0.8
GP9	-6.61	12	-1	0.158	1757	0.921	0.842	16298	0.932	-0.016	0.8
HLF	-6.61	12	-1	0.158	1754	0.921	0.842	16301	0.932	-0.307	0.8
EGR4	-6.62	12	-1	0.158	1751	0.921	0.842	16304	0.933	-0.408	0.8
SRF	-6.63	12	-1	0.158	1749	0.921	0.842	16306	0.933	-0.419	0.8
CASS4	-6.6	12	-1	0.159	1761	0.921	0.841	16294	0.932	-0.419	0.8
IL12RB1	-6.61	12	-1	0.158	1755	0.921	0.842	16300	0.932	-0.361	0.8
IZUMO1	-6.62	12	-1	0.158	1753	0.921	0.842	16302	0.933	-0.371	0.8
TMEM79	-6.6	12	-1	0.159	1760	0.921	0.841	16295	0.932	-0.306	0.8
TSR3	-5.65	9	-0.99	0.162	1793	0.921	0.838	16262	0.931	-0.045	0.79
NUMB	-6.59	12	-1	0.159	1765	0.921	0.841	16290	0.932	-0.356	0.8
C1orf229	-6.6	12	-1	0.159	1759	0.921	0.841	16296	0.932	-0.303	0.8
RAB43	-6.6	12	-1	0.158	1758	0.921	0.842	16297	0.932	-0.216	0.8
ARID5B	-6.59	12	-1	0.159	1762	0.921	0.841	16293	0.932	-0.198	0.8
RLIM	-6.61	12	-1	0.158	1756	0.921	0.842	16299	0.932	-0.411	0.8
SNAP91	-6.59	12	-1	0.159	1764	0.921	0.841	16291	0.932	-0.076	0.8
CDH1	-6.58	12	-1	0.159	1767	0.921	0.841	16288	0.932	-0.162	0.8
AASDHPPT	-6.59	12	-1	0.159	1763	0.921	0.841	16292	0.932	-0.223	0.8
TGS1	-6.3	11	-1	0.159	1766	0.921	0.841	16289	0.932	-0.387	0.8
TMEM190	-6.57	12	-1	0.16	1771	0.921	0.84	16284	0.932	-0.164	0.8
CLRN2	-6.57	12	-1	0.16	1770	0.921	0.84	16285	0.932	-0.31	0.8
TRIM67	-6.56	12	-0.99	0.16	1776	0.921	0.84	16279	0.931	-0.267	0.8
ACOX1	-6.57	12	-0.99	0.16	1773	0.921	0.84	16282	0.931	-0.087	0.8
TAF5	-6.57	12	-1	0.16	1769	0.921	0.84	16286	0.932	-1.099	0.8
GSG1	-6.58	12	-1	0.16	1768	0.921	0.84	16287	0.932	0.145	0.8
FAM84A	-6.57	12	-1	0.16	1772	0.921	0.84	16283	0.932	-0.216	0.8
LUC7L3	-6.28	11	-0.99	0.16	1778	0.921	0.84	16277	0.931	-0.485	0.8
OGDH	-6.56	12	-0.99	0.16	1775	0.921	0.84	16280	0.931	-0.198	0.8
DCTN3	-6.54	12	-0.99	0.161	1780	0.921	0.839	16275	0.931	-0.435	0.79
C1orf106	-6.56	12	-0.99	0.16	1774	0.921	0.84	16281	0.931	-0.369	0.8
CHST5	-6.56	12	-0.99	0.16	1777	0.921	0.84	16278	0.931	-0.179	0.8
CLTA	-6.54	12	-0.99	0.161	1785	0.921	0.839	16270	0.931	-0.047	0.79
WFDC5	-6.26	11	-0.99	0.161	1783	0.921	0.839	16272	0.931	-0.139	0.79
BBX	-6.53	12	-0.99	0.161	1787	0.921	0.839	16268	0.931	-0.473	0.79
MAF1	-6.54	12	-0.99	0.161	1781	0.921	0.839	16274	0.931	-0.235	0.79
PEX1	-6.54	12	-0.99	0.161	1779	0.921	0.839	16276	0.931	-0.34	0.79
PIP5K1C	-6.54	12	-0.99	0.161	1782	0.921	0.839	16273	0.931	-0.206	0.79
TMED1	-6.54	12	-0.99	0.161	1784	0.921	0.839	16271	0.931	-0.39	0.79
KIAA1467	-6.53	12	-0.99	0.161	1790	0.921	0.839	16265	0.931	-0.084	0.79
RBFOX1	-5.65	9	-0.99	0.161	1788	0.921	0.839	16267	0.931	-0.259	0.79
PRSS53	-6.53	12	-0.99	0.161	1789	0.921	0.839	16266	0.931	-0.314	0.79
WNT7B	-6.52	12	-0.99	0.162	1795	0.921	0.838	16260	0.931	-0.214	0.79
IK	-6.49	12	-0.98	0.163	1808	0.921	0.837	16247	0.93	-0.344	0.79
NPHS1	-6.53	12	-0.99	0.161	1791	0.921	0.839	16264	0.931	-0.277	0.79
PRR22	-6.53	12	-0.99	0.161	1786	0.921	0.839	16269	0.931	-0.1	0.79
RELB	-6.52	12	-0.99	0.162	1797	0.921	0.838	16258	0.931	-0.193	0.79
DMRTC2	-6.5	12	-0.98	0.162	1801	0.921	0.838	16254	0.93	-0.179	0.79
BMP3	-6.52	12	-0.99	0.162	1794	0.921	0.838	16261	0.931	-0.204	0.79
IRAK2	-6.52	12	-0.99	0.162	1796	0.921	0.838	16259	0.931	-0.332	0.79
SLC26A11	-6.52	12	-0.99	0.162	1792	0.921	0.838	16263	0.931	0.022	0.79
KLHL29	-5.63	9	-0.98	0.162	1800	0.921	0.838	16255	0.93	-0.075	0.79
NDUFA12	-6.51	12	-0.99	0.162	1799	0.921	0.838	16256	0.93	-0.106	0.79
SOX7	-6.5	12	-0.98	0.163	1806	0.921	0.837	16249	0.93	0.057	0.79
TLE6	-6.5	12	-0.98	0.162	1803	0.921	0.838	16252	0.93	-0.219	0.79
UXS1	-5.94	10	-0.99	0.162	1798	0.921	0.838	16257	0.93	-0.142	0.79
CHADL	-6.5	12	-0.98	0.163	1804	0.921	0.837	16251	0.93	-0.233	0.79
MKL1	-6.49	12	-0.98	0.163	1807	0.921	0.837	16248	0.93	-0.102	0.79
C19orf70	-6.5	12	-0.98	0.162	1802	0.921	0.838	16253	0.93	-0.567	0.79
FCAMR	-6.5	12	-0.98	0.163	1805	0.921	0.837	16250	0.93	-0.122	0.79
XPO7	-6.47	12	-0.98	0.164	1816	0.921	0.836	16239	0.93	-0.181	0.79
ZNF524	-6.48	12	-0.98	0.163	1810	0.921	0.837	16245	0.93	-0.188	0.79
CTIF	-6.48	12	-0.98	0.163	1812	0.921	0.837	16243	0.93	-0.285	0.79
SFN	-6.49	12	-0.98	0.163	1809	0.921	0.837	16246	0.93	-0.14	0.79
COG5	-6.44	12	-0.97	0.165	1828	0.921	0.835	16227	0.929	-0.395	0.78
UGP2	-6.47	12	-0.98	0.164	1818	0.921	0.836	16237	0.93	-0.311	0.79
SELO	-6.48	12	-0.98	0.163	1811	0.921	0.837	16244	0.93	-0.251	0.79
AKAP8L	-6.48	12	-0.98	0.163	1813	0.921	0.837	16242	0.93	-0.102	0.79
INO80	-6.48	12	-0.98	0.163	1815	0.921	0.837	16240	0.93	-0.729	0.79
ZC3H12A	-6.2	11	-0.98	0.163	1814	0.921	0.837	16241	0.93	-0.38	0.79
CIDEA	-6.46	12	-0.98	0.164	1819	0.921	0.836	16236	0.93	-0.18	0.79
KRTAP17-1	-6.46	12	-0.98	0.164	1820	0.921	0.836	16235	0.93	-0.237	0.79
MRPL46	-6.47	12	-0.98	0.164	1817	0.921	0.836	16238	0.93	-0.214	0.79
BRD7	-6.46	12	-0.98	0.164	1822	0.921	0.836	16233	0.93	-0.392	0.79
RPA1	-6.45	12	-0.98	0.165	1824	0.921	0.835	16231	0.929	-1.1	0.78
C16orf11	-6.45	12	-0.98	0.164	1823	0.921	0.836	16232	0.929	-0.246	0.79
KRT75	-6.46	12	-0.98	0.164	1821	0.921	0.836	16234	0.93	-0.257	0.79
CITED4	-6.44	12	-0.97	0.165	1829	0.921	0.835	16226	0.929	-0.009	0.78
C18orf54	-6.45	12	-0.98	0.165	1826	0.921	0.835	16229	0.929	-0.196	0.78
PRSS27	-6.45	12	-0.98	0.165	1825	0.921	0.835	16230	0.929	-0.228	0.78
KISS1R	-6.44	12	-0.98	0.165	1827	0.921	0.835	16228	0.929	-0.218	0.78
LY6G6D	-6.43	12	-0.97	0.165	1831	0.921	0.835	16224	0.929	0.03	0.78
FBXO2	-6.44	12	-0.97	0.165	1830	0.921	0.835	16225	0.929	-0.169	0.78
TARDBP	-6.41	12	-0.97	0.166	1839	0.921	0.834	16216	0.928	-0.415	0.78
TOMM70A	-6.42	12	-0.97	0.166	1835	0.921	0.834	16220	0.929	-0.37	0.78
CHMP1A	-6.42	12	-0.97	0.166	1833	0.921	0.834	16222	0.929	-0.311	0.78
TMEM105	-6.43	12	-0.97	0.165	1832	0.921	0.835	16223	0.929	-0.098	0.78
CTNNBL1	-6.42	12	-0.97	0.166	1834	0.921	0.834	16221	0.929	-0.63	0.78
DNPEP	-6.41	12	-0.97	0.166	1840	0.921	0.834	16215	0.928	-0.5	0.78
EDC4	-6.4	12	-0.97	0.167	1846	0.921	0.833	16209	0.928	-0.224	0.78
ZDHHC7	-6.41	12	-0.97	0.166	1837	0.921	0.834	16218	0.928	-0.153	0.78
HNRNPK	-6.39	12	-0.97	0.167	1851	0.921	0.833	16204	0.928	-0.52	0.78
CCNJL	-6.41	12	-0.97	0.166	1838	0.921	0.834	16217	0.928	-0.294	0.78
DHX29	-6.41	12	-0.97	0.166	1836	0.921	0.834	16219	0.928	-0.079	0.78
ZNF662	-6.4	12	-0.97	0.166	1845	0.921	0.834	16210	0.928	-0.234	0.78
EFNB1	-6.4	12	-0.97	0.167	1848	0.921	0.833	16207	0.928	-0.243	0.78
PRPF3	-6.4	12	-0.97	0.167	1847	0.921	0.833	16208	0.928	-0.393	0.78
METTL13	-6.4	12	-0.97	0.166	1843	0.921	0.834	16212	0.928	-0.567	0.78
FXYD1	-6.4	12	-0.97	0.166	1842	0.921	0.834	16213	0.928	-0.431	0.78
ATG16L1	-6.4	12	-0.97	0.166	1844	0.921	0.834	16211	0.928	-0.309	0.78
FBXO17	-6.39	12	-0.97	0.167	1852	0.921	0.833	16203	0.928	-0.218	0.78
IL18BP	-6.39	12	-0.97	0.167	1849	0.921	0.833	16206	0.928	-0.119	0.78
CABLES2	-6.39	12	-0.97	0.167	1850	0.921	0.833	16205	0.928	-0.218	0.78
LDB1	-6.39	12	-0.97	0.167	1853	0.921	0.833	16202	0.928	-0.222	0.78
DDN	-6.38	12	-0.97	0.167	1854	0.921	0.833	16201	0.928	-0.275	0.78
DUSP9	-6.36	12	-0.96	0.168	1865	0.921	0.832	16190	0.928	-0.113	0.77
B3GAT2	-6.38	12	-0.97	0.167	1856	0.921	0.833	16199	0.928	-0.372	0.78
MFSD5	-6.37	12	-0.96	0.168	1857	0.921	0.832	16198	0.928	-0.228	0.77
DLX1	-6.37	12	-0.96	0.168	1858	0.921	0.832	16197	0.928	-0.289	0.77
FKBP1C	-5.53	9	-0.97	0.167	1855	0.921	0.833	16200	0.928	-0.092	0.78
MTG1	-6.37	12	-0.96	0.168	1862	0.921	0.832	16193	0.928	-0.332	0.77
LSR	-6.37	12	-0.96	0.168	1859	0.921	0.832	16196	0.928	-0.238	0.77
ANKRD35	-6.35	12	-0.96	0.168	1869	0.921	0.832	16186	0.928	-0.214	0.77
GPBAR1	-6.36	12	-0.96	0.168	1863	0.921	0.832	16192	0.928	-0.147	0.77
MAZ	-6.37	12	-0.96	0.168	1860	0.921	0.832	16195	0.928	-0.159	0.77
NGEF	-5.81	10	-0.96	0.168	1861	0.921	0.832	16194	0.928	0.02	0.77
C1QTNF1	-6.41	12	-0.97	0.166	1841	0.921	0.834	16214	0.928	-0.234	0.78
PHF14	-6.36	12	-0.96	0.168	1867	0.921	0.832	16188	0.928	-0.283	0.77
TMEM41A	-6.36	12	-0.96	0.168	1866	0.921	0.832	16189	0.928	-0.4	0.77
PGLYRP4	-6.34	12	-0.96	0.169	1873	0.921	0.831	16182	0.927	-0.269	0.77
H3F3B	-4.49	6	-0.96	0.168	1870	0.921	0.832	16185	0.928	-0.164	0.77
AMH	-6.34	12	-0.96	0.169	1872	0.921	0.831	16183	0.927	-0.334	0.77
ACSS3	-5.51	9	-0.96	0.168	1864	0.921	0.832	16191	0.928	-0.035	0.77
IGSF9	-6.35	12	-0.96	0.169	1871	0.921	0.831	16184	0.927	-0.068	0.77
SIX5	-6.34	12	-0.96	0.169	1875	0.921	0.831	16180	0.927	-0.426	0.77
C16orf54	-6.35	12	-0.96	0.168	1868	0.921	0.832	16187	0.928	-0.021	0.77
UTP18	-6.33	12	-0.96	0.169	1878	0.921	0.831	16177	0.927	-0.489	0.77
DNAJA1	-6.33	12	-0.96	0.169	1876	0.921	0.831	16179	0.927	-0.325	0.77
ZBTB46	-6.33	12	-0.96	0.169	1879	0.921	0.831	16176	0.927	-0.2	0.77
NUDC	-6.34	12	-0.96	0.169	1874	0.921	0.831	16181	0.927	-0.742	0.77
ABCC8	-6.33	12	-0.96	0.169	1883	0.921	0.831	16172	0.927	-0.228	0.77
CELSR3	-6.31	12	-0.95	0.17	1893	0.921	0.83	16162	0.927	-0.276	0.77
TYMS	-6.32	12	-0.96	0.17	1885	0.921	0.83	16170	0.927	-0.271	0.77
MKRN3	-6.33	12	-0.96	0.169	1882	0.921	0.831	16173	0.927	-0.27	0.77
TRMT1	-6.33	12	-0.96	0.169	1877	0.921	0.831	16178	0.927	-0.121	0.77
SBNO1	-6.31	12	-0.95	0.17	1888	0.921	0.83	16167	0.927	-0.313	0.77
ILKAP	-6.32	12	-0.96	0.17	1884	0.921	0.83	16171	0.927	-0.28	0.77
DNAAF1	-6.33	12	-0.96	0.169	1881	0.921	0.831	16174	0.927	-0.25	0.77
TNIP2	-6.31	12	-0.95	0.17	1887	0.921	0.83	16168	0.927	-0.249	0.77
DNLZ	-6.31	12	-0.95	0.17	1890	0.921	0.83	16165	0.927	-0.201	0.77
SNX9	-6.31	12	-0.95	0.17	1889	0.921	0.83	16166	0.927	-0.296	0.77
MED17	-6.31	12	-0.95	0.17	1891	0.921	0.83	16164	0.927	-1.044	0.77
SLC22A15	-6.29	12	-0.95	0.171	1902	0.921	0.829	16153	0.927	-0.375	0.77
WFDC1	-6.3	12	-0.95	0.17	1894	0.921	0.83	16161	0.927	-0.265	0.77
TMEM130	-6.31	12	-0.95	0.17	1892	0.921	0.83	16163	0.927	-0.231	0.77
TP53BP1	-6.3	12	-0.95	0.171	1899	0.921	0.829	16156	0.927	-0.26	0.77
CAPN1	-6.3	12	-0.95	0.17	1895	0.921	0.83	16160	0.927	-0.132	0.77
ZNF76	-6.29	12	-0.95	0.171	1905	0.921	0.829	16150	0.927	-0.229	0.77
P2RY6	-6.3	12	-0.95	0.171	1897	0.921	0.829	16158	0.927	-0.234	0.77
CHAF1B	-6.29	12	-0.95	0.171	1904	0.921	0.829	16151	0.927	-0.199	0.77
DEFB132	-6.3	12	-0.95	0.17	1896	0.921	0.83	16159	0.927	-0.23	0.77
NUBP2	-6.3	12	-0.95	0.171	1900	0.921	0.829	16155	0.927	-0.215	0.77
ISM1	-6.28	12	-0.95	0.171	1906	0.921	0.829	16149	0.927	-0.211	0.77
POLG	-6.31	12	-0.95	0.17	1886	0.921	0.83	16169	0.927	-0.138	0.77
SHISA3	-6.3	12	-0.95	0.171	1898	0.921	0.829	16157	0.927	-0.318	0.77
FANCE	-6.29	12	-0.95	0.171	1901	0.921	0.829	16154	0.927	-0.37	0.77
C16orf89	-6.29	12	-0.95	0.171	1903	0.921	0.829	16152	0.927	-0.338	0.77
FOXRED1	-6.28	12	-0.95	0.171	1907	0.921	0.829	16148	0.927	-0.216	0.77
LAMA5	-6.27	12	-0.95	0.172	1910	0.921	0.828	16145	0.926	-0.329	0.76
ERAL1	-6.26	12	-0.95	0.172	1916	0.921	0.828	16139	0.926	-0.384	0.76
PELI3	-6.28	12	-0.95	0.171	1909	0.921	0.829	16146	0.927	-0.161	0.77
CSTF3	-6.27	12	-0.95	0.172	1912	0.921	0.828	16143	0.926	-0.745	0.76
MAP1LC3C	-6.27	12	-0.95	0.172	1911	0.921	0.828	16144	0.926	0.034	0.76
SNAPC1	-6.28	12	-0.95	0.171	1908	0.921	0.829	16147	0.927	-0.461	0.77
SKI	-6.27	12	-0.95	0.172	1915	0.921	0.828	16140	0.926	-0.325	0.76
CBLN1	-6.27	12	-0.95	0.172	1913	0.921	0.828	16142	0.926	-0.266	0.76
PPP1R3G	-6.25	12	-0.94	0.172	1918	0.921	0.828	16137	0.926	-0.184	0.76
TYW1	-6.26	12	-0.95	0.172	1917	0.921	0.828	16138	0.926	-0.245	0.76
RAD21	-5.72	10	-0.95	0.172	1914	0.921	0.828	16141	0.926	-0.263	0.76
NUP62	-6.24	12	-0.94	0.173	1922	0.921	0.827	16133	0.925	-0.433	0.76
TMEM165	-6.25	12	-0.94	0.173	1919	0.921	0.827	16136	0.926	-0.36	0.76
DCAF4L1	-6.23	12	-0.94	0.173	1926	0.921	0.827	16129	0.925	-0.269	0.76
PBX4	-6.24	12	-0.94	0.173	1920	0.921	0.827	16135	0.925	-0.113	0.76
CCDC85C	-6.23	12	-0.94	0.174	1929	0.921	0.826	16126	0.925	-0.163	0.76
MTMR14	-6.2	12	-0.94	0.174	1940	0.921	0.826	16115	0.925	-0.211	0.76
SGMS2	-6.23	12	-0.94	0.173	1927	0.921	0.827	16128	0.925	-0.214	0.76
GDPD3	-6.23	12	-0.94	0.173	1924	0.921	0.827	16131	0.925	-0.25	0.76
PCDHA3	-6.23	12	-0.94	0.173	1923	0.921	0.827	16132	0.925	-0.162	0.76
KLHDC10	-6.21	12	-0.94	0.174	1933	0.921	0.826	16122	0.925	-0.373	0.76
SYT9	-6.24	12	-0.94	0.173	1921	0.921	0.827	16134	0.925	-0.283	0.76
EZH1	-6.23	12	-0.94	0.173	1925	0.921	0.827	16130	0.925	-0.323	0.76
DGCR14	-6.19	12	-0.94	0.175	1948	0.921	0.825	16107	0.925	-0.426	0.76
PET117	-6.21	12	-0.94	0.174	1936	0.921	0.826	16119	0.925	-0.172	0.76
PPAP2C	-6.22	12	-0.94	0.174	1930	0.921	0.826	16125	0.925	-0.182	0.76
EXD3	-6.22	12	-0.94	0.174	1932	0.921	0.826	16123	0.925	-0.294	0.76
SYT8	-6.21	12	-0.94	0.174	1934	0.921	0.826	16121	0.925	-0.136	0.76
TRMT44	-6.22	12	-0.94	0.174	1931	0.921	0.826	16124	0.925	-0.212	0.76
CREB3L3	-6.23	12	-0.94	0.173	1928	0.921	0.827	16127	0.925	-0.242	0.76
WNK1	-6.2	12	-0.94	0.174	1937	0.921	0.826	16118	0.925	-0.436	0.76
GALNS	-6.2	12	-0.94	0.174	1938	0.921	0.826	16117	0.925	-0.217	0.76
GRIK4	-6.2	12	-0.94	0.175	1942	0.921	0.825	16113	0.925	-0.178	0.76
VAX2	-6.2	12	-0.94	0.175	1941	0.921	0.825	16114	0.925	-0.036	0.76
KIAA0355	-6.2	12	-0.94	0.174	1939	0.921	0.826	16116	0.925	-0.109	0.76
CD8A	-6.19	12	-0.94	0.175	1945	0.921	0.825	16110	0.925	-0.052	0.76
RAD54B	-5.65	10	-0.94	0.175	1944	0.921	0.825	16111	0.925	-0.257	0.76
ELAVL3	-6.19	12	-0.94	0.175	1946	0.921	0.825	16109	0.925	-0.406	0.76
ARL4D	-6.19	12	-0.94	0.175	1943	0.921	0.825	16112	0.925	-0.112	0.76
TAL2	-6.21	12	-0.94	0.174	1935	0.921	0.826	16120	0.925	-0.14	0.76
DNA2	-6.19	12	-0.94	0.175	1947	0.921	0.825	16108	0.925	-0.319	0.76
CLPSL2	-6.18	12	-0.93	0.175	1950	0.921	0.825	16105	0.925	-0.098	0.76
KCNK1	-6.19	12	-0.93	0.175	1949	0.921	0.825	16106	0.925	-0.028	0.76
EIF2S2	-4.37	6	-0.93	0.175	1954	0.921	0.825	16101	0.925	-0.704	0.76
C1orf63	-6.18	12	-0.93	0.175	1952	0.921	0.825	16103	0.925	-0.403	0.76
TNFRSF4	-6.18	12	-0.93	0.176	1955	0.921	0.824	16100	0.925	-0.504	0.75
TRIM47	-6.17	12	-0.93	0.176	1960	0.921	0.824	16095	0.924	-0.157	0.75
FERMT2	-6.18	12	-0.93	0.175	1951	0.921	0.825	16104	0.925	-0.731	0.76
FOXL1	-6.18	12	-0.93	0.175	1953	0.921	0.825	16102	0.925	-0.412	0.76
GAREM	-6.16	12	-0.93	0.176	1966	0.921	0.824	16089	0.924	-0.139	0.75
SRRM2	-6.17	12	-0.93	0.176	1956	0.921	0.824	16099	0.925	-0.216	0.75
GPR62	-6.16	12	-0.93	0.176	1965	0.921	0.824	16090	0.924	-0.202	0.75
PCIF1	-6.16	12	-0.93	0.176	1967	0.921	0.824	16088	0.924	-0.378	0.75
SUSD2	-6.16	12	-0.93	0.176	1964	0.921	0.824	16091	0.924	-0.091	0.75
MIDN	-6.15	12	-0.93	0.176	1969	0.921	0.824	16086	0.924	-0.02	0.75
SNCG	-6.17	12	-0.93	0.176	1957	0.921	0.824	16098	0.925	-0.185	0.75
RHBDF2	-6.15	12	-0.93	0.177	1970	0.921	0.823	16085	0.924	-0.291	0.75
PTOV1	-6.17	12	-0.93	0.176	1963	0.921	0.824	16092	0.924	-0.184	0.75
RANGRF	-6.17	12	-0.93	0.176	1959	0.921	0.824	16096	0.924	-0.262	0.75
LEPREL4	-6.17	12	-0.93	0.176	1962	0.921	0.824	16093	0.924	-0.199	0.75
SLC35F2	-6.17	12	-0.93	0.176	1961	0.921	0.824	16094	0.924	-0.331	0.75
HSD17B1	-6.15	12	-0.93	0.177	1971	0.921	0.823	16084	0.924	-0.264	0.75
GBX2	-6.14	12	-0.93	0.177	1978	0.921	0.823	16077	0.924	-0.286	0.75
TMEM39A	-6.14	12	-0.93	0.177	1976	0.921	0.823	16079	0.924	-0.103	0.75
ZNF747	-6.17	12	-0.93	0.176	1958	0.921	0.824	16097	0.924	-0.135	0.75
OGFOD2	-6.14	12	-0.93	0.177	1980	0.921	0.823	16075	0.924	-0.264	0.75
MCOLN1	-6.14	12	-0.93	0.177	1973	0.921	0.823	16082	0.924	-0.147	0.75
EIF4E1B	-6.15	12	-0.93	0.176	1968	0.921	0.824	16087	0.924	-0.303	0.75
POU3F2	-6.14	12	-0.93	0.177	1975	0.921	0.823	16080	0.924	-0.365	0.75
CSNK2A2	-6.15	12	-0.93	0.177	1972	0.921	0.823	16083	0.924	-0.194	0.75
CEACAM3	-6.14	12	-0.93	0.177	1979	0.921	0.823	16076	0.924	-0.146	0.75
MAML3	-6.13	12	-0.93	0.177	1982	0.921	0.823	16073	0.924	-0.404	0.75
TNIP1	-6.14	12	-0.93	0.177	1977	0.921	0.823	16078	0.924	-0.214	0.75
SLC41A1	-6.14	12	-0.93	0.177	1974	0.921	0.823	16081	0.924	-0.021	0.75
SPACA4	-6.12	12	-0.92	0.178	1990	0.921	0.822	16065	0.924	-0.244	0.75
UGT1A8	-6.13	12	-0.93	0.177	1985	0.921	0.823	16070	0.924	-0.181	0.75
TNFSF14	-6.13	12	-0.93	0.177	1983	0.921	0.823	16072	0.924	-0.162	0.75
MRPS2	-6.12	12	-0.92	0.178	1988	0.921	0.822	16067	0.924	-0.476	0.75
SBK1	-6.12	12	-0.92	0.178	1993	0.921	0.822	16062	0.924	-0.362	0.75
ZNF318	-6.14	12	-0.93	0.177	1981	0.921	0.823	16074	0.924	-0.265	0.75
CRMP1	-6.13	12	-0.92	0.178	1986	0.921	0.822	16069	0.924	-0.126	0.75
GK	-6.12	12	-0.92	0.178	1991	0.921	0.822	16064	0.924	-0.269	0.75
ZNF830	-6.12	12	-0.92	0.178	1994	0.921	0.822	16061	0.924	-0.495	0.75
GPX4	-6.13	12	-0.93	0.177	1984	0.921	0.823	16071	0.924	-0.338	0.75
OARD1	-6.11	12	-0.92	0.178	1995	0.921	0.822	16060	0.924	0.059	0.75
ASNA1	-6.1	12	-0.92	0.179	1998	0.921	0.821	16057	0.924	-0.193	0.75
SLMAP	-6.11	12	-0.92	0.178	1996	0.921	0.822	16059	0.924	-0.311	0.75
SIGLEC9	-6.12	12	-0.92	0.178	1989	0.921	0.822	16066	0.924	-0.321	0.75
SNAPC5	-6.12	12	-0.92	0.178	1987	0.921	0.822	16068	0.924	-0.623	0.75
CXCL1	-5.27	9	-0.92	0.179	2005	0.921	0.821	16050	0.923	-0.161	0.75
ACSM2B	-6.12	12	-0.92	0.178	1992	0.921	0.822	16063	0.924	-0.156	0.75
GOT2	-6.1	12	-0.92	0.179	2002	0.921	0.821	16053	0.923	-0.122	0.75
RAB42	-6.09	12	-0.92	0.179	2003	0.921	0.821	16052	0.923	-0.154	0.75
CNNM1	-6.1	12	-0.92	0.179	2000	0.921	0.821	16055	0.923	-0.114	0.75
TRIM71	-6.07	12	-0.91	0.18	2012	0.921	0.82	16043	0.923	-0.256	0.74
R3HDM4	-6.1	12	-0.92	0.179	1997	0.921	0.821	16058	0.924	-0.289	0.75
CPNE9	-6.1	12	-0.92	0.179	2001	0.921	0.821	16054	0.923	-0.263	0.75
BHLHE23	-6.08	12	-0.92	0.18	2008	0.921	0.82	16047	0.923	-0.354	0.74
RHOJ	-6.08	12	-0.92	0.179	2007	0.921	0.821	16048	0.923	-0.34	0.75
[truncated: 15,822 more rows]

## Sheet: Figure 1c
Experiment	Cell line	Drug	Concentration (nM)	Log10(nM)	Median_viability	SEM	Fluorescence_r1	Fluorescence_r2	Fluorescence_r3	Fluorescence_r4	Fluorescence_r5	Fluorescence_r6	Viability_r1	Viability_r2	Viability_r3	Viability_r4	Viability_r5	Viability_r6	Median_viability	SEM		Illudin S	RPE1-iCas9			RPE1-iCas9 CSB-KO (15)			RPE1-iCas9 ELOF1-KO (2-16)			RPE1-iCas9 PTGR1-KO (11)
1	RPE1-iCas9	Phenylarsine oxide	10	1	5.56803e-05	0.000598833	952	945	939	947	-	-	0.00139201	-0.000167041	-0.00150337	0.000278402	-	-	5.56803e-05	0.000598833		Log10(nM)	Exp_1 mean	Exp_2 mean	Exp_1+2 mean	Exp_1 mean	Exp_2 mean	Exp_1+2 mean	Exp_1 mean	Exp_2 mean	Exp_1+2 mean	Exp_1 mean	Exp_2 mean	Exp_1+2 mean
1	RPE1-iCas9	Untreated	-	-	1.00197	0.0198211	5585	5408	5191	5748	5481	5201	1.03326	0.993838	0.945508	1.06956	1.0101	0.947735	1.00197	0.0198211		0.25	0.927022	0.947929	0.937476	0.325817	0.299523	0.31267	0.640179	0.625914	0.633047	1.01464	1.0082	1.01142
1	RPE1-iCas9	Illudin S	1.77828	0.25	0.927022	0.0482699	5420	4661	4948	5231	4985	6184	0.996511	0.827465	0.891386	0.954416	0.899627	1.16667	0.927022	0.0482699		0.5	0.971566	0.862654	0.91711	0.0587519	0.068923	0.0638375	0.161767	0.153982	0.157874	1.02163	1.00706	1.01434
1	RPE1-iCas9	Illudin S	3.16228	0.5	0.971566	0.0548086	5038	4756	4808	5578	6124	6005	0.911431	0.848624	0.860205	1.0317	1.15331	1.1268	0.971566	0.0548086		0.75	0.864771	0.832348	0.84856	0.00878037	0.0234028	0.0160916	0.000313046	0.00927516	0.0047941	0.93275	0.930484	0.931617
1	RPE1-iCas9	Illudin S	5.62341	0.75	0.864771	0.0548042	4989	4668	4504	4660	5406	6094	0.900518	0.829024	0.792498	0.827243	0.993393	1.14662	0.864771	0.0548042		1	0.79918	0.760934	0.780057	0.0278733	0.0382906	0.0330819	0.000547831	0.0080669	0.00430737	0.85354	0.890641	0.872091
1	RPE1-iCas9	Illudin S	10	1	0.79918	0.0528163	4598	3943	4470	4427	4977	5650	0.813434	0.667551	0.784925	0.775348	0.897845	1.04774	0.79918	0.0528163		1.25	0.352512	0.291439	0.321976	0.0609912	0.0679591	0.0644751	0.0100957	0.01489	0.0124929	0.849114	0.822992	0.836053
1	RPE1-iCas9	Illudin S	17.7828	1.25	0.352512	0.0293642	2638	2419	2267	2404	2927	3084	0.3769	0.328124	0.29427	0.324783	0.441267	0.476234	0.352512	0.0293642		1.5	0.0158689	0.0331257	0.0244973	0.0632305	0.0688159	0.0660232	0.0273133	0.0320899	0.0297016	0.679862	0.650861	0.665361
1	RPE1-iCas9	Illudin S	31.6228	1.5	0.0158689	0.00221231	1033	1009	991	999	1025	1057	0.0194324	0.0140871	0.0100781	0.0118599	0.0176507	0.0247777	0.0158689	0.00221231		1.75	0.027005	0.0289192	0.0279621	0.0489697	0.0551063	0.052038	0.033809	0.0357147	0.0347618	0.350444	0.365221	0.357832
1	RPE1-iCas9	Illudin S	56.2341	1.75	0.027005	0.00112897	1089	1055	1066	1068	1065	1082	0.0319048	0.0243323	0.0267822	0.0272277	0.0265595	0.0303458	0.027005	0.00112897		2	0.0242209	0.0260512	0.0251361	0.0384804	0.0376479	0.0380642	0.028722	0.0296734	0.0291977	0.127143	0.169122	0.148133
1	RPE1-iCas9	Illudin S	100	2	0.0242209	0.000933778	1070	1038	1053	1055	1058	1054	0.0276731	0.020546	0.0238869	0.0243323	0.0250005	0.0241096	0.0242209	0.000933778		2.25	0.0225505	0.0240436	0.0232971	0.0354161	0.0361484	0.0357823	0.0256698	0.0233478	0.0245088	0.0439729	0.0413986	0.0426858
1	RPE1-iCas9	Illudin S	177.828	2.25	0.0225505	0.00182434	1045	1093	1043	1049	1057	1038	0.0221051	0.0327957	0.0216596	0.022996	0.0247777	0.020546	0.0225505	0.00182434		2.5	0.0185415	0.0162999	0.0174207	0.0246911	0.023617	0.0241541	0.0176871	0.0139661	0.0158266	0.0397795	0.0365221	0.0381508
1	RPE1-iCas9	Illudin S	316.228	2.5	0.0185415	0.000832685	1031	1027	1017	1039	1026	1042	0.018987	0.0180961	0.0158689	0.0207688	0.0178734	0.0214369	0.0185415	0.000832685
1	RPE1-iCas9_CSB-KO	Phenylarsine oxide	10	1	-0.000176786	0.00054754	945	942	947	953	-	-	-0.000412501	-0.00111964	5.89287e-05	0.00147322	-	-	-0.000176786	0.00054754		Irofulven	RPE1-iCas9			RPE1-iCas9 CSB-KO (15)			RPE1-iCas9 ELOF1-KO (2-16)			RPE1-iCas9 PTGR1-KO (11)
1	RPE1-iCas9_CSB-KO	Untreated	-	-	0.990532	0.0429625	4745	5071	4696	5227	5805	5591	0.895303	0.972146	0.883753	1.00892	1.14516	1.09472	0.990532	0.0429625		Log10(nM)	Exp_1 mean	Exp_2 mean	Exp_1+2 mean	Exp_1 mean	Exp_2 mean	Exp_1+2 mean	Exp_1 mean	Exp_2 mean	Exp_1+2 mean	Exp_1 mean	Exp_2 mean	Exp_1+2 mean
1	RPE1-iCas9_CSB-KO	Illudin S	1.77828	0.25	0.325817	0.0173014	2020	2241	2295	2363	2549	2423	0.252981	0.305074	0.317802	0.333831	0.377674	0.347974	0.325817	0.0173014		1.5	0.899419	0.916062	0.907741	0.815291	0.791668	0.803479	0.93078	1.07964	1.00521	0.90468	0.904672	0.904676
1	RPE1-iCas9_CSB-KO	Illudin S	3.16228	0.5	0.0587519	0.00321395	1150	1147	1186	1207	1230	1206	0.047909	0.0472019	0.0563947	0.0613448	0.0667662	0.061109	0.0587519	0.00321395		1.75	0.903614	0.936098	0.919856	0.665847	0.643456	0.654652	0.86021	0.890652	0.875431	0.819531	0.856121	0.837826
1	RPE1-iCas9_CSB-KO	Illudin S	5.62341	0.75	0.00878037	0.000479222	985	983	979	978	990	989	0.00901609	0.00854466	0.0076018	0.00736608	0.0101947	0.00995895	0.00878037	0.000479222		2	0.815996	0.960936	0.888466	0.477327	0.47546	0.476394	0.734733	0.730219	0.732476	0.852519	0.830183	0.841351
1	RPE1-iCas9_CSB-KO	Illudin S	10	1	0.0278733	0.00144367	1059	1051	1048	1071	1085	1078	0.026459	0.0245733	0.0238661	0.0292876	0.0325876	0.0309376	0.0278733	0.00144367		2.25	0.854238	0.887519	0.870879	0.191118	0.18575	0.188434	0.593594	0.61005	0.601822	0.833345	0.810896	0.82212
1	RPE1-iCas9_CSB-KO	Illudin S	17.7828	1.25	0.0609912	0.00120448	1206	1199	1179	1205	1212	1213	0.061109	0.059459	0.0547447	0.0608733	0.0625233	0.062759	0.0609912	0.00120448		2.5	0.788404	0.734785	0.761594	0.0333599	0.0571471	0.0452535	0.340881	0.323051	0.331966	0.768607	0.73807	0.753339
1	RPE1-iCas9_CSB-KO	Illudin S	31.6228	1.5	0.0632305	0.00206727	1184	1171	1221	1221	1215	1215	0.0559233	0.052859	0.0646448	0.0646448	0.0632305	0.0632305	0.0632305	0.00206727		2.75	0.654475	0.565309	0.609892	0.0198497	0.0301192	0.0249844	0.0214701	0.0374551	0.0294626	0.777679	0.715291	0.746485
1	RPE1-iCas9_CSB-KO	Illudin S	56.2341	1.75	0.0489697	0.00321438	1152	1127	1138	1157	1210	1199	0.0483804	0.0424876	0.0450804	0.049559	0.0620519	0.059459	0.0489697	0.00321438		3	0.526517	0.462663	0.49459	0.0501957	0.0605035	0.0553496	0.000527952	0.0103002	0.00541406	0.731084	0.716788	0.723936
1	RPE1-iCas9_CSB-KO	Illudin S	100	2	0.0384804	0.0034629	1129	1072	1078	1091	1154	1147	0.042959	0.0295233	0.0309376	0.0340018	0.0488519	0.0472019	0.0384804	0.0034629		3.25	0.192018	0.168172	0.180095	0.0703572	0.0705726	0.0704649	0.0126709	0.0182594	0.0154651	0.754175	0.712132	0.733154
1	RPE1-iCas9_CSB-KO	Illudin S	177.828	2.25	0.0354161	0.00188735	1094	1100	1083	1082	1111	1134	0.034709	0.0361233	0.0321161	0.0318804	0.0387161	0.0441376	0.0354161	0.00188735		3.5	0.0350151	0.026828	0.0309215	0.0668237	0.0647431	0.0657834	0.054907	0.0500962	0.0525016	0.739743	0.75636	0.748051
1	RPE1-iCas9_CSB-KO	Illudin S	316.228	2.5	0.0246911	0.00107632	1036	1049	1054	1037	1057	1064	0.0210375	0.0241018	0.0252804	0.0212733	0.0259875	0.0276375	0.0246911	0.00107632		3.75	0.0758391	0.0409624	0.0584007	0.105068	0.0956573	0.100363	0.0929196	0.0836498	0.0882847	0.833757	0.776312	0.805035
1	RPE1-iCas9_ELOF1-KO	Phenylarsine oxide	10	1	-0.000704354	0.000870312	1001	981	977	979	-	-	0.00258263	-0.000547831	-0.00117392	-0.000860877	-	-	-0.000704354	0.000870312
1	RPE1-iCas9_ELOF1-KO	Untreated	-	-	0.977565	0.0351343	8069	7994	7405	7055	6929	6788	1.10889	1.09715	1.00496	0.950173	0.930452	0.908382	0.977565	0.0351343
1	RPE1-iCas9_ELOF1-KO	Illudin S	1.77828	0.25	0.640179	0.0183074	4705	5290	5295	4961	5188	4658	0.582344	0.67391	0.674693	0.622414	0.657945	0.574988	0.640179	0.0183074
1	RPE1-iCas9_ELOF1-KO	Illudin S	3.16228	0.5	0.161767	0.00526296	2048	1952	2166	2047	1945	1989	0.166462	0.151436	0.184932	0.166306	0.15034	0.157227	0.161767	0.00526296
1	RPE1-iCas9_ELOF1-KO	Illudin S	5.62341	0.75	0.000313046	0.000360909	993	979	979	989	988	985	0.00133045	-0.000860877	-0.000860877	0.000704354	0.000547831	7.82616e-05	0.000313046	0.000360909
1	RPE1-iCas9_ELOF1-KO	Illudin S	10	1	0.000547831	0.000310427	992	986	990	981	985	994	0.00117392	0.000234785	0.000860877	-0.000547831	7.82616e-05	0.00148697	0.000547831	0.000310427
1	RPE1-iCas9_ELOF1-KO	Illudin S	17.7828	1.25	0.0100957	0.00051399	1058	1050	1035	1042	1048	1052	0.0115044	0.0102523	0.00790442	0.00900008	0.00993922	0.0105653	0.0100957	0.00051399
1	RPE1-iCas9_ELOF1-KO	Illudin S	31.6228	1.5	0.0273133	0.00100664	1163	1183	1153	1170	1155	1137	0.0279394	0.0310698	0.0263741	0.029035	0.0266872	0.0238698	0.0273133	0.00100664
1	RPE1-iCas9_ELOF1-KO	Illudin S	56.2341	1.75	0.033809	0.00119507	1235	1198	1193	1203	1221	1185	0.039209	0.0334177	0.0326351	0.0342003	0.0370177	0.0313829	0.033809	0.00119507
1	RPE1-iCas9_ELOF1-KO	Illudin S	100	2	0.028722	0.000569633	1183	1168	1176	1166	1157	1168	0.0310698	0.028722	0.0299742	0.0284089	0.0270002	0.028722	0.028722	0.000569633
1	RPE1-iCas9_ELOF1-KO	Illudin S	177.828	2.25	0.0256698	0.000458571	1149	1151	1158	1141	1138	1148	0.025748	0.0260611	0.0271568	0.0244959	0.0240263	0.0255915	0.0256698	0.000458571
1	RPE1-iCas9_ELOF1-KO	Illudin S	316.228	2.5	0.0176871	0.000744925	1116	1098	1106	1092	1082	1097	0.0205828	0.0177654	0.0190176	0.0168262	0.015261	0.0176088	0.0176871	0.000744925
1	RPE1-iCas9_PTGR1-KO	Phenylarsine oxide	10	1	0.000174727	0.000541162	946	940	936	945	-	-	0.000990118	-0.000407696	-0.00133957	0.000757149	-	-	0.000174727	0.000541162
1	RPE1-iCas9_PTGR1-KO	Untreated	-	-	1.01347	0.0309191	5329	5467	5255	5525	5211	4618	1.02209	1.05424	1.00485	1.06776	0.994603	0.856452	1.01347	0.0309191
1	RPE1-iCas9_PTGR1-KO	Illudin S	1.77828	0.25	1.01464	0.0274532	5166	5387	5389	5709	5207	4843	0.984119	1.03561	1.03607	1.11062	0.993671	0.90887	1.01464	0.0274532
1	RPE1-iCas9_PTGR1-KO	Illudin S	3.16228	0.5	1.02163	0.0260895	5136	5215	5294	5771	5753	5360	0.97713	0.995535	1.01394	1.12507	1.12087	1.02932	1.02163	0.0260895
1	RPE1-iCas9_PTGR1-KO	Illudin S	5.62341	0.75	0.93275	0.0172457	4882	4761	5009	5021	5242	4776	0.917956	0.889767	0.947543	0.950339	1.00182	0.893261	0.93275	0.0172457
1	RPE1-iCas9_PTGR1-KO	Illudin S	10	1	0.85354	0.0355304	4634	5028	4398	5394	4577	4551	0.86018	0.95197	0.805199	1.03724	0.846901	0.840843	0.85354	0.0355304
1	RPE1-iCas9_PTGR1-KO	Illudin S	17.7828	1.25	0.849114	0.0290121	4580	4896	4429	5006	4593	4171	0.847599	0.921218	0.812421	0.946844	0.850628	0.752315	0.849114	0.0290121
1	RPE1-iCas9_PTGR1-KO	Illudin S	31.6228	1.5	0.679862	0.0218027	3847	4135	3680	4034	3873	3506	0.676833	0.743928	0.637927	0.720398	0.68289	0.597391	0.679862	0.0218027
1	RPE1-iCas9_PTGR1-KO	Illudin S	56.2341	1.75	0.350444	0.0255223	2454	2594	2305	3024	2438	2312	0.352307	0.384923	0.317595	0.4851	0.34858	0.319226	0.350444	0.0255223
1	RPE1-iCas9_PTGR1-KO	Illudin S	100	2	0.127143	0.003905	1530	1472	1424	1503	1470	1530	0.137044	0.123532	0.112349	0.130754	0.123066	0.137044	0.127143	0.003905
1	RPE1-iCas9_PTGR1-KO	Illudin S	177.828	2.25	0.0439729	0.00272711	1119	1109	1125	1144	1136	1190	0.0412938	0.0389641	0.0426916	0.047118	0.0452542	0.0578346	0.0439729	0.00272711
1	RPE1-iCas9_PTGR1-KO	Illudin S	316.228	2.5	0.0397795	0.00103213	1104	1106	1124	1111	1132	1114	0.0377992	0.0382652	0.0424586	0.03943	0.0443224	0.0401289	0.0397795	0.00103213
1	RPE1-iCas9	Phenylarsine oxide	10	1	0.00387263	0.00560517	834	820	818	756	-	-	0.00871343	0.00419535	0.00354991	-0.0164587	-	-	0.00387263	0.00560517
1	RPE1-iCas9	Untreated	-	-	0.958315	0.0490539	4523	4164	3647	3547	3686	3867	1.19923	1.08337	0.916523	0.884251	0.929109	0.987522	0.958315	0.0490539
1	RPE1-iCas9	Irofulven	31.6228	1.5	0.899419	0.0617741	4415	3733	3560	3069	3235	3628	1.16437	0.944277	0.888447	0.729991	0.783563	0.910392	0.899419	0.0617741
1	RPE1-iCas9	Irofulven	56.2341	1.75	0.903614	0.0560964	4358	3803	3491	3456	3090	3723	1.14598	0.966867	0.866179	0.854884	0.736769	0.94105	0.903614	0.0560964
1	RPE1-iCas9	Irofulven	100	2	0.815996	0.0610684	4422	3646	3257	3267	3205	3404	1.16663	0.916201	0.790663	0.79389	0.773881	0.838102	0.815996	0.0610684
1	RPE1-iCas9	Irofulven	177.828	2.25	0.854238	0.0712908	4622	3499	3409	3244	3191	3901	1.23117	0.868761	0.839716	0.786467	0.769363	0.998494	0.854238	0.0712908
1	RPE1-iCas9	Irofulven	316.228	2.5	0.788404	0.0518505	3912	2956	3300	2858	3200	3576	1.00204	0.693524	0.80454	0.661898	0.772268	0.89361	0.788404	0.0518505
1	RPE1-iCas9	Irofulven	562.341	2.75	0.654475	0.0528406	3783	2862	2791	2808	2697	2964	0.960413	0.663188	0.640275	0.645762	0.60994	0.696106	0.654475	0.0528406
1	RPE1-iCas9	Irofulven	1000	3	0.526517	0.040872	3165	2634	2497	2363	2380	2373	0.760972	0.589608	0.545396	0.502151	0.507638	0.505379	0.526517	0.040872
1	RPE1-iCas9	Irofulven	1778.28	3.25	0.192018	0.019593	1682	1506	1418	1322	1386	1264	0.28238	0.225581	0.197182	0.166201	0.186855	0.147483	0.192018	0.019593
1	RPE1-iCas9	Irofulven	3162.28	3.5	0.0350151	0.0114925	1058	961	957	873	874	812	0.0810026	0.0496988	0.0484079	0.0212995	0.0216222	0.0016136	0.0350151	0.0114925
1	RPE1-iCas9	Irofulven	5623.41	3.75	0.0758391	0.0101505	1142	1080	1087	997	1004	929	0.108111	0.0881024	0.0903614	0.0613167	0.0635757	0.0393718	0.0758391	0.0101505
1	RPE1-iCas9_CSB-KO	Phenylarsine oxide	10	1	0.000935324	0.00319474	872	890	881	854	-	-	-0.000935324	0.00654727	0.00280597	-0.00841792	-	-	0.000935324	0.00319474
1	RPE1-iCas9_CSB-KO	Untreated	-	-	0.979492	0.03906	3642	3279	3076	3182	3049	3451	1.15055	0.999654	0.915267	0.959331	0.904043	1.07115	0.979492	0.03906
1	RPE1-iCas9_CSB-KO	Irofulven	31.6228	1.5	0.815291	0.0368909	2972	2911	2692	2760	2691	3256	0.872034	0.846676	0.755638	0.783905	0.755222	0.990092	0.815291	0.0368909
1	RPE1-iCas9_CSB-KO	Irofulven	56.2341	1.75	0.665847	0.0208389	2551	2538	2414	2323	2270	2541	0.697024	0.69162	0.640073	0.602245	0.580213	0.692867	0.665847	0.0208389
1	RPE1-iCas9_CSB-KO	Irofulven	100	2	0.477327	0.0150355	2190	2101	1987	1947	1999	2046	0.546957	0.509959	0.46257	0.445942	0.467558	0.487096	0.477327	0.0150355
1	RPE1-iCas9_CSB-KO	Irofulven	177.828	2.25	0.191118	0.00862013	1423	1354	1314	1296	1287	1360	0.228115	0.199432	0.182804	0.175321	0.17158	0.201926	0.191118	0.00862013
1	RPE1-iCas9_CSB-KO	Irofulven	316.228	2.5	0.0333599	0.00826582	1023	990	976	933	918	894	0.0618353	0.0481172	0.0422974	0.0244224	0.0181869	0.00821007	0.0333599	0.00826582
1	RPE1-iCas9_CSB-KO	Irofulven	562.341	2.75	0.0198497	0.00736602	978	953	943	901	891	863	0.0431288	0.0327363	0.0285793	0.01112	0.00696297	-0.00467662	0.0198497	0.00736602
1	RPE1-iCas9_CSB-KO	Irofulven	1000	3	0.0501957	0.00912837	1066	1035	1021	969	952	927	0.0797104	0.0668237	0.0610039	0.0393875	0.0323206	0.0219282	0.0501957	0.00912837
1	RPE1-iCas9_CSB-KO	Irofulven	1778.28	3.25	0.0703572	0.00964248	1135	1085	1077	1004	1010	993	0.108394	0.0876087	0.0842831	0.053937	0.0564312	0.0493643	0.0703572	0.00964248
1	RPE1-iCas9_CSB-KO	Irofulven	3162.28	3.5	0.0668237	0.0105762	1137	1070	1067	986	1003	976	0.109225	0.0813732	0.0801261	0.0464544	0.0535213	0.0422974	0.0668237	0.0105762
1	RPE1-iCas9_CSB-KO	Irofulven	5623.41	3.75	0.105068	0.00920967	1182	1151	1165	1103	1083	1041	0.127932	0.115045	0.120865	0.0950913	0.0867773	0.0693179	0.105068	0.00920967
1	RPE1-iCas9_ELOF1-KO	Phenylarsine oxide	10	1	0	0.00151046	914	919	900	905	-	-	0.00158386	0.0033437	-0.0033437	-0.00158386	-	-	0	0.00151046
1	RPE1-iCas9_ELOF1-KO	Untreated	-	-	0.974952	0.0255152	3841	3665	3572	3684	3675	4067	1.03179	0.969848	0.937115	0.976535	0.973368	1.11134	0.974952	0.0255152
1	RPE1-iCas9_ELOF1-KO	Irofulven	31.6228	1.5	0.93078	0.155117	3493	3109	3185	3615	5026	5707	0.90931	0.774154	0.800903	0.95225	1.44888	1.68857	0.93078	0.155117
1	RPE1-iCas9_ELOF1-KO	Irofulven	56.2341	1.75	0.86021	0.0218265	3622	3278	3324	3335	3372	3609	0.954713	0.833636	0.849827	0.853699	0.866721	0.950138	0.86021	0.0218265
1	RPE1-iCas9_ELOF1-KO	Irofulven	100	2	0.734733	0.0373383	3545	2940	3054	2866	2934	3272	0.927612	0.714671	0.754796	0.688626	0.712559	0.831525	0.734733	0.0373383
1	RPE1-iCas9_ELOF1-KO	Irofulven	177.828	2.25	0.593594	0.0265305	2660	2428	2638	2368	2554	2884	0.61612	0.534464	0.608377	0.513345	0.578812	0.694961	0.593594	0.0265305
1	RPE1-iCas9_ELOF1-KO	Irofulven	316.228	2.5	0.340881	0.0124858	2078	1874	1882	1863	1848	1950	0.411275	0.339473	0.342289	0.335602	0.330322	0.366223	0.340881	0.0124858
1	RPE1-iCas9_ELOF1-KO	Irofulven	562.341	2.75	0.0214701	0.00479569	1037	992	982	952	959	949	0.0448759	0.0290374	0.0255177	0.0149586	0.0174224	0.0139027	0.0214701	0.00479569
1	RPE1-iCas9_ELOF1-KO	Irofulven	1000	3	0.000527952	0.00302592	932	923	924	897	899	877	0.00791928	0.00475157	0.00510354	-0.0043996	-0.00369566	-0.011439	0.000527952	0.00302592
1	RPE1-iCas9_ELOF1-KO	Irofulven	1778.28	3.25	0.0126709	0.00399828	990	960	968	930	931	917	0.0283334	0.0177744	0.0205901	0.00721535	0.00756731	0.00263976	0.0126709	0.00399828
1	RPE1-iCas9_ELOF1-KO	Irofulven	3162.28	3.5	0.054907	0.00551517	1143	1079	1078	1034	1051	1053	0.0821845	0.0596586	0.0593066	0.04382	0.0498035	0.0505074	0.054907	0.00551517
1	RPE1-iCas9_ELOF1-KO	Irofulven	5623.41	3.75	0.0929196	0.00661787	1256	1194	1208	1153	1144	1137	0.121957	0.100135	0.105062	0.0857042	0.0825365	0.0800727	0.0929196	0.00661787
1	RPE1-iCas9_PTGR1-KO	Phenylarsine oxide	10	1	-0.000412343	0.00802216	869	878	809	804	-	-	0.0119579	0.015669	-0.0127826	-0.0148443	-	-	-0.000412343	0.00802216
1	RPE1-iCas9_PTGR1-KO	Untreated	-	-	0.991891	0.0295477	3274	3273	3190	3218	3053	3583	1.00364	1.00323	0.969006	0.980551	0.912515	1.13106	0.991891	0.0295477
1	RPE1-iCas9_PTGR1-KO	Irofulven	31.6228	1.5	0.90468	0.0323641	3168	3170	2866	2956	2691	3112	0.959934	0.960759	0.835407	0.872517	0.763247	0.936843	0.90468	0.0323641
1	RPE1-iCas9_PTGR1-KO	Irofulven	56.2341	1.75	0.819531	0.0256517	3052	3038	2743	2821	2682	2834	0.912102	0.906329	0.784688	0.816851	0.759535	0.822212	0.819531	0.0256517
1	RPE1-iCas9_PTGR1-KO	Irofulven	100	2	0.852519	0.042346	3386	3069	2949	2866	2647	2833	1.04982	0.919112	0.869631	0.835407	0.745103	0.821799	0.852519	0.042346
1	RPE1-iCas9_PTGR1-KO	Irofulven	177.828	2.25	0.833345	0.0301825	3132	2987	2860	2862	2702	2646	0.94509	0.8853	0.832932	0.833757	0.767782	0.744691	0.833345	0.0301825
1	RPE1-iCas9_PTGR1-KO	Irofulven	316.228	2.5	0.768607	0.0405434	3211	2910	2679	2523	2705	2703	0.977665	0.85355	0.758298	0.693973	0.769019	0.768195	0.768607	0.0405434
1	RPE1-iCas9_PTGR1-KO	Irofulven	562.341	2.75	0.777679	0.0538896	3360	2909	2693	2482	2529	2759	1.0391	0.853137	0.764071	0.677067	0.696447	0.791286	0.777679	0.0538896
1	RPE1-iCas9_PTGR1-KO	Irofulven	1000	3	0.731084	0.0598052	3401	2811	2703	2466	2523	2483	1.05601	0.812728	0.768195	0.670469	0.693973	0.677479	0.731084	0.0598052
1	RPE1-iCas9_PTGR1-KO	Irofulven	1778.28	3.25	0.754175	0.067283	3554	2760	2743	2460	2532	2595	1.1191	0.791698	0.784688	0.667995	0.697684	0.723662	0.754175	0.067283
1	RPE1-iCas9_PTGR1-KO	Irofulven	3162.28	3.5	0.739743	0.0788439	3651	2756	2842	2360	2512	2486	1.1591	0.790049	0.82551	0.626761	0.689437	0.678716	0.739743	0.0788439
1	RPE1-iCas9_PTGR1-KO	Irofulven	5623.41	3.75	0.833757	0.0596341	3341	2974	3090	2512	2750	2415	1.03127	0.87994	0.927771	0.689437	0.787575	0.64944	0.833757	0.0596341
2	RPE1-iCas9	Phenylarsine oxide	10	1	-0.000143401	0.000489808	964	961	958	970	-	-	0.000143401	-0.000430203	-0.00100381	0.00129061	-	-	-0.000143401	0.000489808
2	RPE1-iCas9	Untreated	-	-	1.00252	0.0194862	6244	6169	6258	6071	6589	5829	1.00969	0.995347	1.01236	0.97661	1.07565	0.930339	1.00252	0.0194862
2	RPE1-iCas9	Illudin S	1.77828	0.25	0.947929	0.045767	6186	5085	5697	6048	5794	6854	0.998598	0.788085	0.9051	0.972212	0.923647	1.12632	0.947929	0.045767
2	RPE1-iCas9	Illudin S	3.16228	0.5	0.862654	0.0643157	5981	4746	5058	5456	5494	7084	0.959402	0.723268	0.782923	0.859021	0.866286	1.1703	0.862654	0.0643157
2	RPE1-iCas9	Illudin S	5.62341	0.75	0.832348	0.0710056	7175	4785	4979	5263	5370	6271	1.1877	0.730724	0.767818	0.822119	0.842577	1.01485	0.832348	0.0710056
2	RPE1-iCas9	Illudin S	10	1	0.760934	0.043432	4696	4308	4942	5053	4944	5984	0.713708	0.639521	0.760743	0.781967	0.761126	0.959975	0.760934	0.043432
2	RPE1-iCas9	Illudin S	17.7828	1.25	0.291439	0.0198453	2452	2945	2225	2311	2523	2608	0.284651	0.378914	0.241249	0.257692	0.298227	0.314479	0.291439	0.0198453
2	RPE1-iCas9	Illudin S	31.6228	1.5	0.0331257	0.00137759	1133	1126	1140	1149	1133	1175	0.0324565	0.0311181	0.0337949	0.0355157	0.0324565	0.0404869	0.0331257	0.00137759
2	RPE1-iCas9	Illudin S	56.2341	1.75	0.0289192	0.00120185	1115	1141	1099	1114	1113	1134	0.0290148	0.0339861	0.0259556	0.0288236	0.0286324	0.0326477	0.0289192	0.00120185
2	RPE1-iCas9	Illudin S	100	2	0.0260512	0.000633663	1099	1083	1106	1104	1099	1100	0.0259556	0.0228964	0.027294	0.0269116	0.0259556	0.0261468	0.0260512	0.000633663
2	RPE1-iCas9	Illudin S	177.828	2.25	0.0240436	0.00144326	1084	1117	1094	1067	1107	1079	0.0230876	0.0293972	0.0249996	0.0198372	0.0274852	0.0221316	0.0240436	0.00144326
2	RPE1-iCas9	Illudin S	316.228	2.5	0.0162999	0.00105122	1061	1042	1029	1056	1032	1055	0.01869	0.0150571	0.0125715	0.0177339	0.0131451	0.0175427	0.0162999	0.00105122
2	RPE1-iCas9_CSB-KO	Phenylarsine oxide	10	1	0.00016066	0.000465842	932	927	935	937	-	-	-0.00016066	-0.00123172	0.000481979	0.000910405	-	-	0.00016066	0.000465842
2	RPE1-iCas9_CSB-KO	Untreated	-	-	0.968725	0.0330925	5191	5451	5381	5459	6188	5936	0.912173	0.967868	0.952873	0.969582	1.12574	1.07176	0.968725	0.0330925
2	RPE1-iCas9_CSB-KO	Illudin S	1.77828	0.25	0.299523	0.0132159	2007	2297	2323	2339	2346	2456	0.230118	0.29224	0.29781	0.301237	0.302737	0.3263	0.299523	0.0132159
2	RPE1-iCas9_CSB-KO	Illudin S	3.16228	0.5	0.068923	0.00216091	1238	1234	1239	1288	1284	1270	0.0653885	0.0645317	0.0656027	0.0760992	0.0752423	0.0722433	0.068923	0.00216091
2	RPE1-iCas9_CSB-KO	Illudin S	5.62341	0.75	0.0234028	0.000204471	1044	1042	1039	1038	1043	1042	0.0238312	0.0234028	0.0227601	0.0225459	0.023617	0.0234028	0.0234028	0.000204471
2	RPE1-iCas9_CSB-KO	Illudin S	10	1	0.0382906	0.000401392	1103	1112	1109	1117	1112	1111	0.0364698	0.0383977	0.037755	0.0394688	0.0383977	0.0381835	0.0382906	0.000401392
2	RPE1-iCas9_CSB-KO	Illudin S	17.7828	1.25	0.0679591	0.0015563	1236	1243	1229	1257	1277	1261	0.0649601	0.0664596	0.0634606	0.0694586	0.0737428	0.0703154	0.0679591	0.0015563
2	RPE1-iCas9_CSB-KO	Illudin S	31.6228	1.5	0.0688159	0.00119961	1253	1231	1263	1231	1255	1256	0.0686017	0.063889	0.0707439	0.063889	0.0690302	0.0692444	0.0688159	0.00119961
2	RPE1-iCas9_CSB-KO	Illudin S	56.2341	1.75	0.0551063	0.000769877	1198	1180	1196	1177	1194	1186	0.05682	0.0529642	0.0563916	0.0523215	0.0559632	0.0542495	0.0551063	0.000769877
2	RPE1-iCas9_CSB-KO	Illudin S	100	2	0.0376479	0.00195835	1110	1087	1090	1107	1141	1135	0.0379693	0.0330424	0.033685	0.0373266	0.0446099	0.0433246	0.0376479	0.00195835
2	RPE1-iCas9_CSB-KO	Illudin S	177.828	2.25	0.0361484	0.00126216	1079	1086	1110	1093	1113	1110	0.0313287	0.0328281	0.0379693	0.0343276	0.0386119	0.0379693	0.0361484	0.00126216
2	RPE1-iCas9_CSB-KO	Illudin S	316.228	2.5	0.023617	0.000735846	1036	1041	1050	1027	1045	1047	0.0221175	0.0231886	0.0251165	0.0201896	0.0240454	0.0244738	0.023617	0.000735846
2	RPE1-iCas9_ELOF1-KO	Phenylarsine oxide	10	1	-0.000675203	0.000923735	981	953	961	954	-	-	0.00266528	-0.00131487	-0.000177685	-0.00117272	-	-	-0.000675203	0.000923735
2	RPE1-iCas9_ELOF1-KO	Untreated	-	-	1.00154	0.0156931	8326	7975	8041	8238	7807	7596	1.04674	0.996849	1.00623	1.03423	0.972968	0.942975	1.00154	0.0156931
2	RPE1-iCas9_ELOF1-KO	Illudin S	1.77828	0.25	0.625914	0.0163869	5182	5294	5570	5567	5437	4828	0.599829	0.61575	0.654983	0.654556	0.636077	0.549509	0.625914	0.0163869
2	RPE1-iCas9_ELOF1-KO	Illudin S	3.16228	0.5	0.153982	0.0063824	2102	1989	2229	2144	1975	1955	0.162013	0.145951	0.180066	0.167984	0.14396	0.141118	0.153982	0.0063824
2	RPE1-iCas9_ELOF1-KO	Illudin S	5.62341	0.75	0.00927516	0.000150211	1028	1022	1025	1027	1029	1028	0.00934624	0.00849335	0.00891979	0.00920409	0.00948839	0.00934624	0.00927516	0.000150211
2	RPE1-iCas9_ELOF1-KO	Illudin S	10	1	0.0080669	0.000422344	1030	1020	1018	1015	1010	1026	0.00963053	0.00820905	0.00792476	0.00749831	0.00678757	0.00906194	0.0080669	0.000422344
2	RPE1-iCas9_ELOF1-KO	Illudin S	17.7828	1.25	0.01489	0.000527631	1085	1070	1061	1061	1064	1071	0.0174487	0.0153165	0.0140371	0.0140371	0.0144636	0.0154586	0.01489	0.000527631
2	RPE1-iCas9_ELOF1-KO	Illudin S	31.6228	1.5	0.0320899	0.00117772	1172	1213	1192	1185	1153	1191	0.0298156	0.0356436	0.0326585	0.0316635	0.0271147	0.0325164	0.0320899	0.00117772
2	RPE1-iCas9_ELOF1-KO	Illudin S	56.2341	1.75	0.0357147	0.000969263	1203	1230	1213	1214	1228	1185	0.0342222	0.0380602	0.0356436	0.0357858	0.0377759	0.0316635	0.0357147	0.000969263
2	RPE1-iCas9_ELOF1-KO	Illudin S	100	2	0.0296734	0.000525072	1181	1162	1174	1176	1157	1168	0.0310949	0.0283941	0.0300999	0.0303842	0.0276833	0.029247	0.0296734	0.000525072
2	RPE1-iCas9_ELOF1-KO	Illudin S	177.828	2.25	0.0233478	0.00047819	1130	1125	1144	1122	1128	1122	0.0238453	0.0231346	0.0258354	0.0227082	0.023561	0.0227082	0.0233478	0.00047819
2	RPE1-iCas9_ELOF1-KO	Illudin S	316.228	2.5	0.0139661	0.000367025	1073	1061	1065	1055	1060	1058	0.0157429	0.0140371	0.0146057	0.0131842	0.013895	0.0136107	0.0139661	0.000367025
2	RPE1-iCas9_PTGR1-KO	Phenylarsine oxide	10	1	0.000103756	0.000103756	958	958	958	956	-	-	0.000103756	0.000103756	0.000103756	-0.000311268	-	-	0.000103756	0.000103756
2	RPE1-iCas9_PTGR1-KO	Untreated	-	-	0.994397	0.025548	5710	5470	5564	5792	6334	5789	0.9862	0.936398	0.955904	1.00322	1.11569	1.00259	0.994397	0.025548
2	RPE1-iCas9_PTGR1-KO	Illudin S	1.77828	0.25	1.0082	0.0267312	5398	5870	5857	6374	5730	5775	0.921457	1.0194	1.0167	1.12399	0.990351	0.999689	1.0082	0.0267312
2	RPE1-iCas9_PTGR1-KO	Illudin S	3.16228	0.5	1.00706	0.0304781	5670	5571	5951	6280	6350	5530	0.9779	0.957356	1.03621	1.10448	1.11901	0.948848	1.00706	0.0304781
2	RPE1-iCas9_PTGR1-KO	Illudin S	5.62341	0.75	0.930484	0.0280201	5410	5473	5164	4869	5823	5563	0.923947	0.93702	0.872899	0.811683	1.00965	0.955696	0.930484	0.0280201
2	RPE1-iCas9_PTGR1-KO	Illudin S	10	1	0.890641	0.0334847	5303	5773	4842	5838	5065	5196	0.901743	0.999274	0.80608	1.01276	0.852355	0.879539	0.890641	0.0334847
2	RPE1-iCas9_PTGR1-KO	Illudin S	17.7828	1.25	0.822992	0.0362343	4948	5466	4801	4899	5259	4222	0.828076	0.935568	0.797572	0.817908	0.892613	0.677423	0.822992	0.0362343
2	RPE1-iCas9_PTGR1-KO	Illudin S	31.6228	1.5	0.650861	0.0120851	4103	4148	3993	4085	4169	3784	0.652729	0.662067	0.629902	0.648994	0.666425	0.586532	0.650861	0.0120851
2	RPE1-iCas9_PTGR1-KO	Illudin S	56.2341	1.75	0.365221	0.0203165	2819	2763	2189	2826	2672	2601	0.386283	0.374663	0.255551	0.387736	0.355779	0.341046	0.365221	0.0203165
2	RPE1-iCas9_PTGR1-KO	Illudin S	100	2	0.169122	0.00477869	1770	1775	1664	1818	1781	1706	0.168603	0.169641	0.146607	0.178564	0.170886	0.155323	0.169122	0.00477869
2	RPE1-iCas9_PTGR1-KO	Illudin S	177.828	2.25	0.0413986	0.00311483	1129	1112	1155	1205	1159	1198	0.0355883	0.0320606	0.0409836	0.0513592	0.0418137	0.0499066	0.0413986	0.00311483
2	RPE1-iCas9_PTGR1-KO	Illudin S	316.228	2.5	0.0365221	0.000667954	1135	1148	1136	1129	1125	1132	0.0368334	0.039531	0.0370409	0.0355883	0.0347582	0.0362108	0.0365221	0.000667954
2	RPE1-iCas9	Phenylarsine oxide	10	1	0.00363653	0.00651253	895	868	865	785	-	-	0.0114585	0.00404821	0.00322485	-0.0187316	-	-	0.00363653	0.00651253
2	RPE1-iCas9	Untreated	-	-	0.996752	0.0385101	4926	4589	4012	4807	4381	4266	1.11779	1.0253	0.866935	1.08513	0.968209	0.936647	0.996752	0.0385101
2	RPE1-iCas9	Irofulven	31.6228	1.5	0.916062	0.0974825	5709	4159	4767	4223	4103	3065	1.33269	0.90728	1.07415	0.924845	0.89191	0.607026	0.916062	0.0974825
2	RPE1-iCas9	Irofulven	56.2341	1.75	0.936098	0.0462383	4384	4609	3532	4144	3975	4588	0.969032	1.03078	0.735197	0.903163	0.85678	1.02502	0.936098	0.0462383
2	RPE1-iCas9	Irofulven	100	2	0.960936	0.0829356	5100	3757	3251	4811	3898	4834	1.16554	0.796949	0.658075	1.08622	0.835647	1.09254	0.960936	0.0829356
2	RPE1-iCas9	Irofulven	177.828	2.25	0.887519	0.0829236	5392	4642	3204	4027	4147	3885	1.24568	1.03984	0.645175	0.871052	0.903986	0.832079	0.887519	0.0829236
2	RPE1-iCas9	Irofulven	316.228	2.5	0.734785	0.0301892	3977	3331	3482	3579	3371	3886	0.857329	0.680031	0.721474	0.748096	0.691009	0.832354	0.734785	0.0301892
2	RPE1-iCas9	Irofulven	562.341	2.75	0.565309	0.0380306	2898	3363	2980	2346	2664	2928	0.561192	0.688814	0.583697	0.409693	0.49697	0.569426	0.565309	0.0380306
2	RPE1-iCas9	Irofulven	1000	3	0.462663	0.0503246	2873	2812	2295	2783	1742	2200	0.554331	0.537589	0.395696	0.52963	0.243922	0.369622	0.462663	0.0503246
2	RPE1-iCas9	Irofulven	1778.28	3.25	0.168172	0.0469473	1645	1565	1363	1196	2376	1367	0.2173	0.195343	0.139903	0.0940695	0.417926	0.141001	0.168172	0.0469473
2	RPE1-iCas9	Irofulven	3162.28	3.5	0.026828	0.0129589	1105	1003	912	789	842	990	0.0690941	0.0410997	0.0161242	-0.0176337	-0.00308762	0.0375317	0.026828	0.0129589
2	RPE1-iCas9	Irofulven	5623.41	3.75	0.0409624	0.00647181	1000	1077	969	1005	1028	905	0.0402763	0.0614093	0.0317682	0.0416486	0.047961	0.0142031	0.0409624	0.00647181
2	RPE1-iCas9_CSB-KO	Phenylarsine oxide	10	1	-0.00114824	0.00192638	874	897	884	874	-	-	-0.00291477	0.00521125	0.000618284	-0.00291477	-	-	-0.00114824	0.00192638
2	RPE1-iCas9_CSB-KO	Untreated	-	-	1.01884	0.0306983	3863	3823	3895	3669	3317	3709	1.05311	1.03898	1.06442	0.984572	0.860209	0.998705	1.01884	0.0306983
2	RPE1-iCas9_CSB-KO	Irofulven	31.6228	1.5	0.791668	0.0269462	3145	3101	3358	3075	3017	3496	0.799441	0.783895	0.874695	0.774709	0.754218	0.923451	0.791668	0.0269462
2	RPE1-iCas9_CSB-KO	Irofulven	56.2341	1.75	0.643456	0.0154582	2704	2637	2440	2711	2703	2711	0.643633	0.619962	0.550361	0.646106	0.64328	0.646106	0.643456	0.0154582
2	RPE1-iCas9_CSB-KO	Irofulven	100	2	0.47546	0.0104782	2342	2218	2164	2147	2238	2279	0.515737	0.471927	0.452849	0.446842	0.478993	0.493479	0.47546	0.0104782
2	RPE1-iCas9_CSB-KO	Irofulven	177.828	2.25	0.18575	0.00927279	1494	1411	1445	1326	1335	1405	0.216134	0.18681	0.198822	0.156779	0.159959	0.18469	0.18575	0.00927279
2	RPE1-iCas9_CSB-KO	Irofulven	316.228	2.5	0.0571471	0.00489929	1100	1003	1061	1055	1033	1023	0.0769321	0.0426616	0.0631532	0.0610334	0.0532607	0.0497277	0.0571471	0.00489929
2	RPE1-iCas9_CSB-KO	Irofulven	562.341	2.75	0.0301192	0.00772083	967	978	1056	968	907	915	0.0299426	0.0338289	0.0613867	0.0302959	0.0087443	0.0115707	0.0301192	0.00772083
2	RPE1-iCas9_CSB-KO	Irofulven	1000	3	0.0605035	0.00800153	1032	1038	1110	1069	948	1076	0.0529074	0.0550272	0.0804652	0.0659797	0.0232298	0.0684528	0.0605035	0.00800153
2	RPE1-iCas9_CSB-KO	Irofulven	1778.28	3.25	0.0705726	0.0061509	1109	1081	1117	998	1083	1063	0.0801119	0.0702193	0.0829383	0.040895	0.070926	0.0638599	0.0705726	0.0061509
2	RPE1-iCas9_CSB-KO	Irofulven	3162.28	3.5	0.0647431	0.00837435	1162	1129	1062	1069	1016	1023	0.098837	0.087178	0.0635066	0.0659797	0.0472545	0.0497277	0.0647431	0.00837435
2	RPE1-iCas9_CSB-KO	Irofulven	5623.41	3.75	0.0956573	0.00521728	1170	1157	1149	1179	1122	1081	0.101663	0.0970705	0.0942441	0.104843	0.0847048	0.0702193	0.0956573	0.00521728
2	RPE1-iCas9_ELOF1-KO	Phenylarsine oxide	10	1	0.000468189	0.000896514	899	905	905	893	-	-	-0.000468189	0.00140457	0.00140457	-0.00234095	-	-	0.000468189	0.000896514
2	RPE1-iCas9_ELOF1-KO	Untreated	-	-	0.988815	0.0216038	4242	3975	4019	4118	3914	4358	1.04297	0.959632	0.973365	1.00427	0.940592	1.07918	0.988815	0.0216038
2	RPE1-iCas9_ELOF1-KO	Irofulven	31.6228	1.5	1.07964	0.0555212	3616	4052	4553	4166	4668	4750	0.847578	0.983665	1.14004	1.01925	1.17594	1.20153	1.07964	0.0555212
2	RPE1-iCas9_ELOF1-KO	Irofulven	56.2341	1.75	0.890652	0.0207484	3897	3523	3529	3743	3765	3873	0.935286	0.818551	0.820423	0.887218	0.894085	0.927795	0.890652	0.0207484
2	RPE1-iCas9_ELOF1-KO	Irofulven	100	2	0.730219	0.0370321	3496	3364	2996	3116	2760	3456	0.810123	0.768923	0.65406	0.691515	0.580398	0.797638	0.730219	0.0370321
2	RPE1-iCas9_ELOF1-KO	Irofulven	177.828	2.25	0.61005	0.0632712	2582	3881	2905	2805	2596	3268	0.52484	0.930292	0.625657	0.594444	0.52921	0.738959	0.61005	0.0632712
2	RPE1-iCas9_ELOF1-KO	Irofulven	316.228	2.5	0.323051	0.00979389	2099	1934	1941	1903	1882	1937	0.374083	0.322582	0.324767	0.312906	0.306352	0.323519	0.323051	0.00979389
2	RPE1-iCas9_ELOF1-KO	Irofulven	562.341	2.75	0.0374551	0.00349936	1033	1030	1017	965	1024	986	0.0413567	0.0404203	0.0363627	0.0201321	0.0385476	0.0266868	0.0374551	0.00349936
2	RPE1-iCas9_ELOF1-KO	Irofulven	1000	3	0.0103002	0.00281424	934	933	960	914	943	897	0.0104562	0.0101441	0.0185715	0.0042137	0.0132654	-0.00109244	0.0103002	0.00281424
2	RPE1-iCas9_ELOF1-KO	Irofulven	1778.28	3.25	0.0182594	0.00251084	983	982	967	936	951	945	0.0257504	0.0254383	0.0207564	0.0110805	0.0157624	0.0138896	0.0182594	0.00251084
2	RPE1-iCas9_ELOF1-KO	Irofulven	3162.28	3.5	0.0500962	0.00275122	1105	1057	1064	1072	1041	1058	0.0638298	0.0488477	0.0510326	0.0535296	0.0438537	0.0491599	0.0500962	0.00275122
2	RPE1-iCas9_ELOF1-KO	Irofulven	5623.41	3.75	0.0836498	0.00512981	1208	1210	1193	1114	1143	1144	0.0959788	0.096603	0.0912969	0.0666389	0.0756906	0.0760027	0.0836498	0.00512981
2	RPE1-iCas9_PTGR1-KO	Phenylarsine oxide	10	1	0.000997617	0.00802239	956	992	878	926	-	-	0.0059857	0.0179571	-0.0199523	-0.00399047	-	-	0.000997617	0.00802239
2	RPE1-iCas9_PTGR1-KO	Untreated	-	-	1.0061	0.018376	4004	4088	3923	3892	3714	4050	1.01956	1.0475	0.992629	0.98232	0.923128	1.03486	1.0061	0.018376
2	RPE1-iCas9_PTGR1-KO	Irofulven	31.6228	1.5	0.904672	0.00853477	3697	3667	3576	3650	3670	3535	0.917475	0.907499	0.877238	0.901846	0.908496	0.863604	0.904672	0.00853477
2	RPE1-iCas9_PTGR1-KO	Irofulven	56.2341	1.75	0.856121	0.0218887	3539	3447	3173	3504	3521	3651	0.864934	0.83434	0.743225	0.853295	0.858948	0.902178	0.856121	0.0218887
2	RPE1-iCas9_PTGR1-KO	Irofulven	100	2	0.830183	0.0427596	3898	3457	3412	3528	3033	3094	0.984315	0.837666	0.822701	0.861276	0.696669	0.716954	0.830183	0.0427596
2	RPE1-iCas9_PTGR1-KO	Irofulven	177.828	2.25	0.810896	0.0120822	3533	3373	3380	3304	3444	3298	0.862939	0.809732	0.81206	0.786787	0.833343	0.784792	0.810896	0.0120822
2	RPE1-iCas9_PTGR1-KO	Irofulven	316.228	2.5	0.73807	0.0482076	3462	3789	3285	2825	3030	2991	0.839328	0.948069	0.780469	0.627501	0.695671	0.682702	0.73807	0.0482076
2	RPE1-iCas9_PTGR1-KO	Irofulven	562.341	2.75	0.715291	0.0224013	3434	3194	3041	3137	2997	3011	0.830017	0.750208	0.699329	0.731253	0.684698	0.689353	0.715291	0.0224013
2	RPE1-iCas9_PTGR1-KO	Irofulven	1000	3	0.716788	0.022212	3155	3190	2866	3204	3032	2837	0.737239	0.748878	0.641135	0.753533	0.696337	0.631491	0.716788	0.022212
2	RPE1-iCas9_PTGR1-KO	Irofulven	1778.28	3.25	0.712132	0.0485303	3652	3579	3118	2733	3041	2995	0.902511	0.878235	0.724935	0.596907	0.699329	0.684033	0.712132	0.0485303
2	RPE1-iCas9_PTGR1-KO	Irofulven	3162.28	3.5	0.75636	0.0295539	3573	3458	3151	3032	3274	3071	0.87624	0.837998	0.735909	0.696337	0.776811	0.709306	0.75636	0.0295539
2	RPE1-iCas9_PTGR1-KO	Irofulven	5623.41	3.75	0.776312	0.0297757	3159	3362	3589	3629	3183	3147	0.738569	0.806074	0.881561	0.894862	0.74655	0.734579	0.776312	0.0297757

## Sheet: Figure 1f
Protein	min-Log p-value	Difference
C5orf22 (iso-1)	6.81103	10.8166
SUPT6H	4.55619	6.00194
C5orf22 (iso-2)	5.7493	5.79386
POLR2A	3.10958	5.78726
POLR2B	2.84734	5.6495
POLR2C	5.89765	5.10547
SUPT16H	5.55811	5.01335
POLR2G	2.61607	4.78866
POLR2H	3.55162	4.7235
POLR2L	3.28791	4.72086
POLR2E	3.42141	4.72079
SUPT5H	2.28404	4.37142
POLR2J	4.25811	3.85497
POLR2D	4.0901	3.77802
GFP	1.25163	0.138767
POLR2M	0.0813001	-0.194227
DCAF13	4.31615	4.14832
CUL4B	1.85129	3.04611
DDB1	3.41383	1.27087
RPS29	3.86751	7.09187
HIST1H1C	7.35608	6.98656
HIST2H2AB	1.818	6.91361
RALY	1.37166	5.95758
RPL26L1	3.94277	5.91256
RPL35	2.01431	5.74509
RPL23A	2.09652	5.73666
WDR12	2.79584	5.65894
MRPS2	2.85651	5.62097
RPL7L1	6.75454	5.46549
BRIX1	3.98753	5.39089
CDC5L	4.09367	5.31943
BANF1	2.55625	5.24303
CDCA8	2.47703	5.2321
NOP2	5.44796	5.17085
DNTTIP2	5.58694	5.12151
WDR3	3.77803	4.93191
MRPS18B	2.97159	4.88376
MRPS10	3.37501	4.88024
PELP1	1.89911	4.85217
UTP15	3.85274	4.83912
PWP2	3.69422	4.79604
UTP18	2.73661	4.75103
SSRP1	4.99665	4.74268
MRPS23	2.7189	4.7411
MRPS7	2.18095	4.73045
TRA2A	1.82991	4.70454
SNRPD2	4.08621	4.70444
UBTF	1.81503	4.70442
MRPS21	3.78658	4.67196
NGDN	4.48481	4.65227
WDR36	3.10495	4.62913
NAT10	2.68812	4.6224
RRP9	6.63972	4.61662
RPL21	1.59783	4.57898
PTCD3	2.99097	4.5348
RBM8A	2.5003	4.52104
INCENP	2.921	4.49413
PHIP	2.89709	4.39022
LLPH	2.06277	4.35656
UTP20	4.65004	4.2945
MRPS34	1.86521	4.27
MRTO4	1.96379	4.24901
RPL26	3.14455	4.24481
SRSF1	1.64588	4.23704
SUV39H1	3.01035	4.22344
H2AFY2	2.58505	4.20304
H1FX	1.70784	4.17442
WDR46	2.4926	4.1503
MRPS14	2.4202	4.14798
MRPS26	2.17836	4.10764
RPL9	2.0467	4.09012
EIF4A3	2.19574	4.07428
MRPS27	4.01786	4.06691
NOP14	3.55757	3.98239
RPL39P5;RPL39	1.41303	3.97066
TEX10	2.30989	3.96506
MRPS9	2.17206	3.94669
RPL37A	3.8096	3.94317
H1F0	3.72727	3.93754
TBL3	2.27721	3.91603
MRPL23	3.06844	3.89607
SURF6	2.36913	3.85395
BYSL	3.30634	3.84901
LAS1L	1.82865	3.84451
BOP1	3.16649	3.83652
HEATR1	2.53725	3.79701
SNRNP70	5.73462	3.7858
RPL31	2.06702	3.78474
MRPL9	5.46086	3.77303
YBX3	7.50032	3.75533
AURKB	3.58608	3.7374
RPS24	3.63717	3.72979
RPL32	3.39592	3.6932
BMS1	5.39265	3.69256
NOL10	3.23874	3.68888
MRPS17;hCG_1984214	2.5066	3.6688
RPS8	3.78861	3.65767
SRSF5	2.54372	3.65013
SRSF6	1.20358	3.63675
RSL1D1	3.56925	3.63292
RPL5	2.97081	3.62061
MRPS31	2.7175	3.58642
RPL27	3.76092	3.54748
MRPL37	2.79419	3.54158
RPL18A	3.59244	3.53901
DAP3	4.22223	3.53899
HIST1H1E;HIST1H1D	3.76591	3.50293
PES1	4.15324	3.48486
HIST2H3PS2	4.04376	3.47978
KAT7	2.15804	3.47664
UTP6	4.36022	3.4502
MRPS5	2.90468	3.44041
RPS27	1.02339	3.43423
MRPS28	2.32593	3.43195
RPL10A	3.6777	3.42023
RPS9	4.85608	3.41757
MRPL28	3.94245	3.41202
CBX1	2.26433	3.4054
CENPB	2.50475	3.40451
RPL36	3.76247	3.35598
RPL14	3.51029	3.35466
EMG1	4.36154	3.35185
RPS6	3.8966	3.35103
MAGOHB	2.6717	3.31542
MRPS33	1.69911	3.29927
RPL4	4.19435	3.26345
MRPL15	1.85427	3.26178
MPHOSPH10	2.46446	3.2535
GAR1	5.76295	3.2399
ACIN1	1.70023	3.18309
MRPL3	1.38061	3.18225
CIRH1A	3.81155	3.17619
IMP3	3.40681	3.17602
MRPS6	1.69493	3.17171
MRPS16	1.15145	3.16627
RPL13A;RPL13a	3.51627	3.16497
HIST1H4A	3.56974	3.15833
RPL19	3.94331	3.1427
CHD1	1.91688	3.13555
RPL7A	3.74494	3.1262
PNN	2.0088	3.10961
HIST1H1A	1.94195	3.10269
RPLP2	3.85058	3.09793
NOL9	2.63279	3.08453
MRPS22	3.71395	3.06762
EBNA1BP2	2.86237	3.05724
RPL12	3.2728	3.0331
RPL13	3.6009	3.01846
HNRNPA1;HNRNPA1L2	3.79477	2.99426
UTP11L	1.32381	2.99094
MRPS11	2.14692	2.98675
TSPYL2	3.25963	2.97646
WDR43	1.48501	2.97294
H2AFY	4.23683	2.96605
HIST1H2BC	3.24868	2.94721
MRPL24	2.34529	2.93777
NOP56	1.6165	2.91376
NOL7	2.87164	2.90759
MRPS35	1.63711	2.90404
RPS26;RPS26P11	1.03728	2.89505
RPL27A	3.14769	2.87789
PARP2	2.23778	2.87402
RPLP0;RPLP0P6	3.81929	2.8689
SRSF10	1.17965	2.8484
MRPL17	2.23303	2.84239
RPL18	3.26017	2.83693
FTSJ3	1.75132	2.82517
RPS13	4.62076	2.81224
RPL8	3.27948	2.81055
RPS12	3.36102	2.80496
RPL7	3.5651	2.79451
RPL28	3.74033	2.78527
MRPL38	2.62796	2.76935
SRSF9	1.44896	2.76359
AATF	1.20442	2.73951
RPL6	3.85271	2.72918
LUC7L2	1.54067	2.72656
HNRNPC	1.38502	2.69565
DKC1	2.46803	2.69512
RPL3	3.76987	2.6915
RPL29	2.57548	2.69077
SRSF3	1.16873	2.66745
RAB1B	1.06761	2.65699
RNPS1	2.4567	2.6548
RPL15	3.79853	2.64877
MRPS18A	2.44814	2.64679
RPL22	0.630248	2.64349
BAZ1B	2.20209	2.6329
RPS15	2.74235	2.62256
RPL24	3.36105	2.61914
RCL1	2.36672	2.58531
RPL34	3.33623	2.57899
TRIM26	1.76586	2.56036
MRPL20	3.21673	2.5522
RPS18	4.09648	2.55019
H2AFV;H2AFZ	2.18502	2.53144
SAP18	2.12466	2.5287
HIST2H2BE	3.22813	2.49055
MEAF6	1.61096	2.47447
YBX1	3.69632	2.46847
RPL17;RPL17-C18orf32	3.68072	2.46773
MRPL19	3.1963	2.44606
RPL10	4.08497	2.43935
WDR75	2.05558	2.42719
WDR55	1.42713	2.38757
SENP3;SENP3-EIF4A1	1.42524	2.38496
RPS3	3.71434	2.34218
NOC4L	2.57925	2.32727
GNL3	1.12386	2.31554
RPS19	3.46958	2.31487
SNRPG;SNRPGP15	1.9481	2.30148
MRPL13	1.5285	2.29751
THRAP3	1.63584	2.28912
NIFK	1.58968	2.27511
RPS10;RPS10-NUDT3	3.89389	2.2728
MRPL4	1.39019	2.27051
TTN	1.18784	2.26053
DDX54	2.41944	2.25379
RPS16	4.22107	2.22762
C7orf50	1.05317	2.22254
HIST2H3A;HIST1H3A;HIST3H3;H3F3B;H3F3A;H3F3C	3.10884	2.1734
RPS5	2.95629	2.15153
HIST1H2AJ;HIST1H2AH;H2AFJ;HIST1H2AG;HIST1H2AD	3.07736	2.13092
NKTR	1.32287	2.11865
SRSF7	1.99102	2.09714
NOLC1	4.86618	2.09419
MRPL41	4.06652	2.09316
CASC3	3.96198	2.08719
MRPL21	1.34943	2.07487
SNRPN;SNRPB	1.32975	2.0666
WDR18	2.032	2.04029
BRD1	1.89748	2.03822
NKRF	1.12203	2.03754
IMP4	0.819334	2.0355
MRPS25	2.48684	2.03189
IGHV3-66	0.334789	2.02834
MRPL44	2.0813	2.02737
UTP3	1.72563	2.01762
YTHDC1	1.96611	2.01573
ABHD14B	0.942536	1.99513
MRPL47	0.963958	1.99272
RPS25	4.48866	1.98305
HP1BP3	0.924947	1.96681
MRPL45	0.97592	1.96255
ERH	1.96451	1.94439
SCAF1	2.47671	1.93786
MAGEB2	0.745083	1.91834
CBX5	2.59826	1.91611
MRPL22	2.57644	1.91293
RPL30	3.23752	1.89681
SGOL1	2.078	1.89413
TRA2B	1.69536	1.87157
PAF1	1.2828	1.8395
MRPS15	1.74315	1.81057
CTR9	1.27137	1.789
SRRM1	2.52069	1.77992
RPS20	2.821	1.77613
BCLAF1	1.48715	1.76287
ZNF280C	1.17738	1.75813
RPSA	0.916583	1.73541
C11orf98	0.628766	1.71556
PRPF19	0.726321	1.7108
NOL11	1.02135	1.70804
NOP58	1.98539	1.69315
RBM39	4.25339	1.69204
HLA-B	0.785084	1.67159
APOBEC3B	1.68313	1.62916
SON	1.18228	1.61903
MTA2	1.07762	1.61315
RPL35A	1.27763	1.59062
PPP2CA;PPP2CB	0.792647	1.54074
SLC25A6	0.794388	1.50588
PPIG	1.30818	1.50071
GANAB	3.58341	1.4557
MRPL12	1.72972	1.40038
FBL	3.4872	1.38835
DNAJC9	0.740647	1.37833
GADD45GIP1	1.1368	1.3774
RPS14	3.62869	1.37717
SMARCA5	3.82885	1.37134
MRPL18	0.534972	1.36594
ACTA1;ACTC1;ACTG2;ACTA2	0.269517	1.32514
MRPL39	1.10462	1.32486
RPS15A	1.90107	1.30667
MRPL14	2.70452	1.29855
OASL	1.08445	1.29687
PTMA	1.79578	1.29038
CBX3	2.3873	1.28221
APOBEC3F	0.322883	1.16773
RPS2	3.40025	1.15284
RPS3A	2.55588	1.08381
HMGN2	0.634485	1.0523
CUL4A	0.386298	1.03859
UBE2D3;UBE2D2	0.270003	1.03697
GTPBP4	0.277647	1.00634
DDX27	0.645404	0.963285
RRP12	1.80778	0.953988
RPL11	1.67832	0.951209
ZC3H18	2.18419	0.917245
RPS4X	3.05835	0.899627
UTP14A	0.814217	0.898064
WIZ	2.07078	0.883963
ATP5L	0.604174	0.876191
ATP5F1	0.509141	0.866596
TOP2B	0.435086	0.827724
MYL6	0.424397	0.827574
CDC73	1.12515	0.826721
PHB	2.66003	0.781535
RPS27A;UBC;UBB;UBA52	1.71582	0.755862
SRRM2	1.03191	0.740698
PARP1	0.684861	0.716444
HLA-A	1.51204	0.712431
POGZ	2.55763	0.706007
LEO1	0.284279	0.705435
DDX18	0.357871	0.699567
PTMS	0.455741	0.697717
PNO1	0.397294	0.696116
TMSB10	0.355692	0.67667
PABPC1;PABPC3	0.449858	0.668983
RPL36AL	1.58724	0.657841
MDN1	0.52092	0.630074
RPS11	1.66396	0.619141
PHB2	2.84343	0.604362
RPS17	0.939123	0.583958
WHSC1	0.889674	0.573103
NOP16	0.733083	0.571649
ATP5B	1.37501	0.571534
XRN2	2.28836	0.556157
UQCRC1	0.661344	0.54189
DNMT3A	0.623182	0.504798
KLHDC8B	0.269592	0.458923
RPS23	2.28123	0.44965
VDAC2	0.620697	0.425295
CHAMP1	1.38043	0.394943
LARP1	2.26464	0.38098
TOP2A	0.691495	0.379478
APOBEC3C	0.452954	0.367716
MARCKSL1	0.210144	0.350244
SRSF4	0.398872	0.328497
PGAM5	0.75402	0.323134
RRP7A	0.848199	0.314983
PSME1	0.619145	0.314135
SNX1	0.18658	0.309121
NOL6	1.2487	0.302663
CYB5R3	1.26186	0.297598
TFPI	0.109875	0.291736
EEF1A2	0.088956	0.291625
PGRMC1	0.0666924	0.282154
TUBB	0.416488	0.261957
ATP5A1	0.816379	0.257617
ARF4	0.249849	0.251377
RAB7A	0.78926	0.247816
VDAC1	0.399775	0.243717
HDAC10	0.0418459	0.23985
RRS1	0.171995	0.23578
CALM2;CALM1;CALM3	0.0709441	0.232344
SMARCA1	0.0857879	0.230625
RPS28	0.0272242	0.226484
RAB11B;RAB11A	0.524415	0.22506
HNRNPA2B1	0.605422	0.224972
PFN1	0.172146	0.218433
TRIM28	0.0927603	0.197959
EIF4B	0.0761521	0.177417
CYC1	0.0920202	0.177114
MVD	0.0724652	0.173361
ZNF532	0.189772	0.171703
DNAJA1	0.0489968	0.166363
DDX50	0.0726289	0.159789
PDCD6	0.300082	0.158443
HDAC6	0.812014	0.136724
RPN2	0.2398	0.114007
GPATCH8	0.0948968	0.111215
MOV10	0.257941	0.0983047
AHCY	0.572411	0.0946131
KRT18	0.163211	0.0866375
MYL12A;MYL12B;MYL9	0.154447	0.0769382
DYNC1H1	0.115975	0.0740819
RAB2A;RAB2B	0.207033	0.0710039
DYNC1I2	0.0284767	0.0702257
ATP5C1	0.103053	0.0634975
CHD2	0.0278089	0.0507722
TUBB6	0.180467	0.0472884
DHX30	0.0383775	0.037056
C15orf52	0.0610904	0.0366573
PRKDC	0.234271	0.0325861
RBM12B	0.0241943	0.0281677
SF3B3	0.0679799	0.0264201
SNW1	0.169126	0.0263896
LMNB1	0.0339061	0.0160894
BRPF1	NaN	0
CLK2	NaN	0
CLTA	NaN	0
DDX10	NaN	0
FAU	NaN	0
ING4	NaN	0
JADE1	NaN	0
LDHB	NaN	0
MRPL2	NaN	0
MSN	NaN	0
RPS27L	NaN	0
RPS7	NaN	0
SPEN	NaN	0
LMNB2	0.00183255	-0.00350714
TPT1;TPT1P8	0.0024237	-0.0062685
HDAC2	0.0127542	-0.00956106
PSME2	0.0350706	-0.0227456
PRPF8	0.0557057	-0.0278273
ACSL3	0.0116637	-0.0323811
CSE1L	0.0748748	-0.0348825
CANX	0.0812077	-0.0393252
TUBB4B	0.116873	-0.0515418
IPO5	0.145245	-0.0610285
TUBB2B	0.204144	-0.0624294
SNRPA1	0.18717	-0.0748262
IPO7	0.235662	-0.0792327
TUBA3E	0.0241938	-0.08213
SEC22B	0.110544	-0.0842586
ATP5O	0.146655	-0.0853634
LARP4	0.121252	-0.086935
GART	0.321985	-0.0994539
OCIAD1	0.181734	-0.1014
SCD	0.0959087	-0.103469
ZNF687	0.059075	-0.113977
STT3A	0.236904	-0.124776
NFKB2	0.316457	-0.138356
HSPA9	0.482462	-0.14148
SLC25A3	0.781911	-0.151667
PSIP1	0.0935829	-0.171712
NPM1	0.36222	-0.172176
MARS	0.102368	-0.176649
EXOSC10	0.0918057	-0.188196
ESF1	0.269798	-0.207685
ELMSAN1	0.168657	-0.208953
DUT	0.621237	-0.214464
RBMX	0.270233	-0.222901
RPN1	1.33252	-0.223609
HNRNPH1	0.509177	-0.229299
MYH9	1.31747	-0.231408
ENO1	0.0974116	-0.23761
HSPA8	1.59238	-0.237984
TUBA1A;TUBA1B	1.27804	-0.24089
RPL23	0.390762	-0.266844
COASY	0.141836	-0.267554
CAD	0.733042	-0.273254
TCEB2	0.642862	-0.287256
DDOST	0.632096	-0.294809
SLC25A5	0.903185	-0.295126
IQGAP1	1.24715	-0.29864
RAB34	0.39617	-0.302953
HNRNPM	2.07091	-0.316943
NTPCR	0.11179	-0.32161
ARFGAP3	0.230067	-0.333095
GAPDH	0.317375	-0.336297
XPO1	0.946389	-0.34371
MTHFD1	2.3368	-0.345315
PLIN3	2.56854	-0.36591
RAB1A	1.21421	-0.372558
DHX15	1.06925	-0.382573
MAGEA4	2.79925	-0.383702
RUVBL1	0.233933	-0.385363
SMARCC1	0.522889	-0.389547
CBS	1.14462	-0.396126
MMTAG2	2.06746	-0.406918
KPNB1	1.03307	-0.425084
PRRC2A	0.334537	-0.425727
HNRNPF	1.89202	-0.428636
HDGFRP2	0.693036	-0.445182
PFN2	0.737167	-0.446945
KHSRP	2.13222	-0.460987
RPL38	1.21583	-0.464402
IWS1	0.280282	-0.47968
RAN	1.31764	-0.481288
UBA1	2.0915	-0.491457
HSPB1	1.87816	-0.492067
SEC61B	0.110062	-0.493659
ATP1A1	0.835867	-0.494747
DHX9	1.95327	-0.503058
PCBP1	1.5475	-0.50348
RAB5C	1.42483	-0.503694
UPP1	1.822	-0.503747
UBXN1	0.341413	-0.504024
HADHB	0.878957	-0.504989
RECQL	1.62983	-0.50978
PFAS	1.21236	-0.510363
ZNF638	2.41887	-0.511348
PRDX6	2.70902	-0.513906
VAPA	1.43516	-0.515443
CTBP2;CTBP1	0.166006	-0.516789
TCP1	2.41364	-0.51928
HSD17B10	1.07397	-0.529504
CAMK2G;CAMK2B	0.902371	-0.533854
MYD88	1.23347	-0.535235
PKM	2.21328	-0.541327
CCT3	1.0205	-0.542631
CAND1	0.970561	-0.546018
HADHA	1.42462	-0.547579
C8orf33	1.84504	-0.549334
RUVBL2	1.4016	-0.550887
DPYSL3	1.55829	-0.558781
ALDH7A1	1.69006	-0.567157
RAB18	1.31983	-0.569757
HSPD1	3.6999	-0.573495
UQCRC2	0.846056	-0.57926
CLTC	1.89921	-0.583244
HSPA1B;HSPA1A	1.83569	-0.585508
TUFM	1.12148	-0.587152
BAG2	1.21881	-0.594805
RCC2	2.23566	-0.597141
RRM1	1.83646	-0.599255
PHGDH	1.67958	-0.600726
AHNAK	2.99494	-0.601787
G6PD	3.61531	-0.606817
CHD4	1.33202	-0.619644
EEF2	3.79628	-0.622073
HSP90AB1	2.492	-0.624394
CTPS1	2.75126	-0.627052
DDX17	2.65246	-0.631151
TAGLN2	2.66302	-0.63392
ACTG1;ACTB	3.68281	-0.634018
OGFR	1.28507	-0.643143
KIF2C	1.22259	-0.647232
PDIA6	1.39586	-0.64818
HNRNPU	3.80003	-0.66199
ARL1	1.5997	-0.672861
ADAR	3.74579	-0.675699
FOXK1	0.976321	-0.679816
PDCD6IP	2.67648	-0.681766
PLEC	1.88166	-0.683979
MCM5	3.19424	-0.686644
ACLY	1.50363	-0.692852
ATL3	1.35506	-0.695145
NDUFS3	0.663066	-0.696279
EEF1A1;EEF1A1P5	3.35019	-0.700838
PTPN11	0.82601	-0.714603
MAP4	4.33649	-0.720781
HSP90AA1	1.16414	-0.725476
EIF4E	2.27165	-0.728081
GSPT2;GSPT1	0.803489	-0.729017
VIM	2.37771	-0.730278
LMNA	1.8721	-0.745474
MCM3	4.26311	-0.748834
PCBP2	4.01778	-0.757788
HSPA5	2.37832	-0.775267
DDX47	1.40907	-0.780403
FAM120A	1.82367	-0.781051
MATR3	2.8832	-0.781649
PRDX5	1.45047	-0.786852
CRKL	1.72755	-0.794246
PLS3	2.50606	-0.801236
SERBP1	3.87817	-0.816089
TNS3	3.24759	-0.816875
FLNA	2.77011	-0.817056
GMPS	2.17006	-0.826159
MTPN	2.98132	-0.827056
FXR1	2.80657	-0.845033
ZC3HAV1L	1.55085	-0.848388
PPIA	1.70478	-0.848566
CARS	3.42533	-0.849007
PRDX3	2.23786	-0.857011
DDX5	2.89185	-0.85941
SPATS2L	2.12377	-0.866686
PARS2	0.516471	-0.867529
RHOA	2.60517	-0.87878
RBBP4;RBBP7	0.303426	-0.88451
LGALS1	2.15026	-0.885221
MOCS2	1.04526	-0.886749
NAP1L1	2.46235	-0.88874
PRDX1	3.50141	-0.893332
PHLDB1	0.634942	-0.898531
MIF	2.71145	-0.899887
GNAS	1.2709	-0.915698
YWHAZ	2.79526	-0.924724
RB1	2.87867	-0.926595
RTN4	0.705593	-0.927911
PPP2R1A	2.36448	-0.941789
KPNA2	1.4961	-0.941952
CBX2	2.85049	-0.949376
UBE2L6	3.13312	-0.954277
FASN	5.03952	-0.957243
GPD2	1.91938	-0.962681
CSTB	0.999268	-0.963275
TXN	2.15751	-0.965031
SRM	3.23457	-0.967528
SEC23A	2.65827	-0.967731
FARSB	2.14976	-0.968166
DDX3X;DDX3Y	5.07505	-0.976127
USP5	4.56031	-0.978608
DARS	2.18057	-0.980634
CSRP2	3.59778	-0.988601
SRP14	1.95067	-1.0162
CNN3	3.77008	-1.02365
PFKP	0.456954	-1.02938
DDX21	0.869762	-1.04237
DPYSL2	2.24977	-1.04346
PSMD9	2.39253	-1.04674
NASP	2.34787	-1.0492
SF3B1	3.58531	-1.0519
TXNDC12	0.773083	-1.05245
NUP155	2.82641	-1.06206
TPM3	4.56015	-1.06745
NFU1	2.21527	-1.06751
SAFB	3.56507	-1.0724
SLC25A13	0.807267	-1.07256
YTHDF1	3.76871	-1.07361
FLNC	2.0917	-1.07381
CXorf67	4.77119	-1.08246
CAV1	1.42934	-1.08257
MKI67	3.83139	-1.08492
PSMC5	2.0317	-1.09067
MAT2A	2.2192	-1.10336
CSRP1	2.00059	-1.10507
SSR4	0.549283	-1.10511
CAPZA1	3.71605	-1.11012
HNRNPK	4.66827	-1.11557
ANLN	2.5439	-1.11713
FN3KRP	2.12799	-1.12464
CEBPZ	0.609818	-1.12524
PTBP1	4.6215	-1.12779
ANXA1	3.36092	-1.15892
SEC31A	2.13685	-1.1602
SLC25A1	0.610843	-1.16748
NUDT16L1	2.63296	-1.17115
SH3GL1	3.33378	-1.17506
NUMA1	0.929366	-1.18483
KHDRBS1	2.88921	-1.18931
HAT1	3.69272	-1.1899
CTNND1	2.75177	-1.19994
USP24	0.913013	-1.19997
TMPO	0.838405	-1.2012
ATXN2L	2.51887	-1.20451
RAB14	0.858958	-1.21728
FLNB	2.17958	-1.21872
ABI1	2.65332	-1.221
STRAP	2.3029	-1.22267
LYPLA2	1.93042	-1.23229
CCT8	3.31719	-1.23276
SRP9;DKFZp564M2223	2.86308	-1.2332
PIP5K1A;PIPSL	1.76472	-1.23622
UFM1	1.85838	-1.24139
KIF5B;KIF5A	0.453653	-1.2421
CCT7	2.62633	-1.24603
PELO	4.83069	-1.25196
RWDD2B	1.06711	-1.25369
PML	2.96103	-1.26666
PARK7	3.86481	-1.26874
LANCL2	2.80374	-1.27313
IPO9	2.20106	-1.27634
SFN	4.64982	-1.27992
RELA	2.4232	-1.28208
DCTPP1	3.57699	-1.28802
OPA1	3.13747	-1.28847
MTHFD1L	2.03015	-1.28967
DBN1	1.39923	-1.29064
PDAP1	2.5283	-1.29125
HPRT1	2.73356	-1.29742
HNRNPL	4.72269	-1.2983
PROSC	3.86502	-1.30866
TRIP12	1.90059	-1.30878
ELAVL1	3.37363	-1.31189
YWHAG	2.31304	-1.31378
STAT1	2.34658	-1.32018
FTO	1.11543	-1.3365
SEC24C	2.94371	-1.33828
VPS28	1.9599	-1.34783
PRDX2	5.4691	-1.35048
S100A10	1.04125	-1.3514
HNRNPA3	4.13003	-1.35472
DDX54	2.58014	-1.36254
TSPYL5	3.26904	-1.36939
BOLA2;BOLA2B	4.80398	-1.37101
HNRNPD	1.18084	-1.37661
CCDC84	2.85137	-1.39086
BAG3	1.37947	-1.3964
PALLD	5.45292	-1.39769
CFL1	6.51583	-1.40132
NCKAP1	2.79065	-1.40698
NES	2.6563	-1.41813
ATOX1	3.04468	-1.43038
GSDMD	5.29095	-1.43261
SYNCRIP	0.980655	-1.44331
BCAP31	0.969715	-1.4547
TNPO1	1.30638	-1.46655
NME1-NME2;NME2;NME1	3.13603	-1.46723
SHC1	4.70287	-1.46917
TCEAL3	1.86	-1.47924
ACACA	1.31786	-1.48058
PEF1	0.813334	-1.48074
SMARCA4	1.1505	-1.48655
PRPF31	1.13208	-1.49605
SRP68	3.53099	-1.50336
CCT6A	0.583809	-1.51304
CSNK1D;CSNK1E	3.60451	-1.51995
SEC23IP	1.65171	-1.52193
TSG101	2.38586	-1.52665
UQCRQ	2.32012	-1.54243
ANXA2;ANXA2P2	4.48876	-1.54267
CHMP1A	0.736837	-1.54273
CYFIP1	5.07056	-1.5512
MAGED2	4.14848	-1.55303
EEF1G	3.45049	-1.56208
DNAJA2	2.12328	-1.57883
HDGF	4.81995	-1.58886
DHRS2	3.94173	-1.58927
TK1	0.766127	-1.59095
DHX36	3.7031	-1.59186
PTK2	1.70713	-1.62061
IBA57	4.90846	-1.62218
CIT	2.6765	-1.63034
HUWE1	2.83404	-1.63422
TIGAR	2.18261	-1.65188
CACYBP	0.925409	-1.66787
PRKRA	0.91762	-1.67811
PTPN23	2.80203	-1.68623
SDHB	2.78768	-1.68914
CT45A3;CT45A1;CT45A2;CT45A9;CT45A8;CT45A7;CT45A10;CT45A5;CT45A6	2.77972	-1.69973
SF1	1.77048	-1.70205
CORO1C	3.08904	-1.70241
CARM1	1.12457	-1.70848
MPP6	1.49398	-1.72164
DBNL	2.80134	-1.72308
EXOSC4	2.11414	-1.73298
TLN1	1.41484	-1.74458
TRIM25	4.38395	-1.7461
RNF213	1.65151	-1.74662
HSPA14	6.5309	-1.75267
GSR	1.05509	-1.75482
GNB1L	3.70243	-1.75661
SMAP1	3.12089	-1.76392
ADRM1	1.11955	-1.76415
UBLCP1	3.44686	-1.76689
RARS	1.87528	-1.78759
MAP4K4	1.80617	-1.79412
ARGLU1	0.548703	-1.79908
MTCH2	0.861085	-1.81021
CCT2	1.86753	-1.83092
PPME1	1.53474	-1.83918
CAPZB	4.87972	-1.85085
SCRIB	5.1657	-1.86084
LRRC59	2.06657	-1.86726
PRMT1	1.22477	-1.87582
AMPD2	0.902179	-1.88752
MSH2	0.764873	-1.89303
CDC20	1.74869	-1.89838
KANK2	4.34754	-1.9037
CTTN	3.72782	-1.92449
DDX1	1.34116	-1.94753
SRP72	1.63322	-1.94939
FSCN1	4.83709	-1.95134
CNN2	0.939393	-1.95768
RNPEP	2.0486	-1.96575
ILF2	1.5569	-1.96674
C14orf166	1.08227	-1.96927
TXLNA	1.39083	-1.97487
SMC4	0.960562	-1.97802
YTHDF2	1.43855	-1.98324
BCAT1	2.288	-1.98738
CDC37	2.86045	-1.98921
IDH3B	2.16719	-2.01567
FARSA	3.52271	-2.03977
GMDS	3.01303	-2.04
EIF5A;EIF5A2;EIF5AL1	0.85017	-2.0506
GARS	3.6836	-2.07913
PPP1R12A	3.12733	-2.08642
PBK	2.02001	-2.10025
KIF23	2.52461	-2.17566
OCIAD2	1.54083	-2.18481
UBE2L3	2.7061	-2.18648
RTCB	5.22144	-2.19737
SDHA	2.57099	-2.21366
TRIM56	1.85865	-2.23851
ERI3	2.89708	-2.25093
CALD1	3.52787	-2.25894
ISOC1	1.92758	-2.2669
CCT5	1.51102	-2.27739
USP10	1.76836	-2.28322
FAM49B	2.01225	-2.31279
HSPH1	4.32424	-2.32833
CPOX	1.68536	-2.34052
CMSS1	1.47074	-2.38731
ZFP36L1	3.31577	-2.40777
NUDC	4.85384	-2.42821
CAPNS1	2.12787	-2.46916
YWHAQ	1.20876	-2.51012
OLA1	1.29986	-2.51915
EFHD2	1.80819	-2.57271
IL18	1.11368	-2.57804
CBX4	2.09061	-2.62796
VRK2	2.73474	-2.63906
GRB2	1.59557	-2.65272
SMYD5	1.98677	-2.65607
CHORDC1	3.73269	-2.66562
ZNF207	1.89172	-2.67648
PPP2R2A	1.84788	-2.70571
PDLIM4	1.85636	-2.71987
STAT3	0.59393	-2.75823
TEAD4;TEAD2;TEAD1;TEAD3	1.93129	-2.81778
ACTN1	2.0314	-2.83424
RRM2B	1.40672	-2.89728
NUFIP2	3.12171	-2.91408
LANCL1	0.907709	-2.93111
BUB3	1.03122	-2.95203
DNAJC7	3.25271	-2.97528
OTUB1	2.08396	-3.00926
UBA6	1.94828	-3.01127
RNMT	1.98644	-3.01302
SEPT9	2.11524	-3.05447
PAICS	1.60608	-3.17177
SERPINH1	2.01392	-3.17538
TBCB	2.75018	-3.22363
UEVLD	3.30223	-3.23411
TARDBP;TDP43	3.15513	-3.23754
SEC23B	1.911	-3.24215
SIAH1	1.30574	-3.29594
RBP1	1.83111	-3.32459
HSP90B1	2.14972	-3.33717
OSBPL10	2.39869	-3.36928
DUSP3	3.58796	-3.41735
SKP1	0.996687	-3.51379
PCMT1	1.40251	-3.54138
CAPZA2	3.15802	-3.85185
HN1L	2.09033	-3.94525
NARFL	4.44141	-3.94634
EEF1D	3.11026	-3.95052
PTBP3	5.60512	-3.99572
FBXO22	1.87773	-4.07471
PTGES3	4.46143	-4.11667
HNRNPLL	2.05681	-4.3635

## Sheet: Figure 1g
Protein	min-Log p-value	Difference
LEO1	1.11412	-2.18251
BRPF1	2.63898	-2.80664
C5orf22 (iso-2)	5.31344	6.18635
C7orf50	0.935029	-1.7739
CDC73	0.885035	-0.701886
CHD2	0.602561	-1.5039
CTR9	1.52445	-1.39241
DDB1	0.693703	-0.294196
GFP	2.43945	1.35897
SUPT6H	1.20858	0.794592
POLR2A	3.11454	2.13886
C5orf22 (iso-1)	7.25291	10.5038
DCAF13	2.69631	-1.50451
POLR2B	2.84487	2.21856
POLR2G	1.29783	2.15789
CUL4B	1.29987	0.202479
POLR2C	2.13099	1.62397
POLR2L	1.77413	2.31897
POLR2H	1.61194	2.53213
POLR2E	3.80461	2.42232
PAF1	0.386947	-0.608419
POLR2J	2.2471	2.2852
POLR2M	2.41254	1.43206
SUPT5H	3.41799	5.00462
SUPT16H	2.62713	-1.27137
POLR2D	1.5891	3.01217
SNRPA1	2.62043	1.02915
RPS27L	1.87559	-5.40595
AATF	2.64545	-2.44554
ABI1	2.4401	3.13001
ACIN1	2.14304	-1.45148
RALY	0.596647	3.97134
EEF1D	1.297	-2.65946
TMSB10	0.475274	-1.9026
PCMT1	0.36401	1.61249
ADAR	3.06762	1.40193
AHCY	3.18087	1.01045
HMGN2	0.765378	-1.82441
AHNAK	1.93299	1.21
CALM2;CALM1;CALM3	0.519744	-0.979083
ALDH7A1	1.87363	3.00943
IGHV3-66	0.0349468	0.19587
RPL39P5;RPL39	0.999485	-2.87043
ANXA1	2.75103	1.42867
SENP3;SENP3-EIF4A1	1.09748	-1.73117
CUL4A	0.940768	-1.8679
RBP1	0.0826619	0.259035
ANXA2;ANXA2P2	3.53124	1.62207
HNRNPD	1.07627	-1.73539
PNO1	1.94234	-2.20053
EIF5A;EIF5A2;EIF5AL1	0.434437	1.5028
SMARCA4	NaN	0
CLK2	0.833239	-1.63362
BCLAF1	1.45387	-0.905285
MRPS16	0.0687011	0.349985
NIFK	1.26078	-1.69195
HNRNPLL	0.0977868	0.336266
BOLA2;BOLA2B	2.51944	1.35455
SRSF1	2.41154	-2.38102
IWS1	1.75614	-2.32619
PRKRA	0.0618697	-0.107486
BOP1	2.87376	-0.77891
SEPT9	0.175048	-0.403431
TTN	0.0754287	-0.309148
H1FX	1.13358	-2.72657
DDX21	0.738941	-0.885913
BRIX1	1.2694	-0.859904
BYSL	2.95142	-1.56558
NARFL	NaN	0
IL18	0.729617	2.03403
MEAF6	0.939002	-1.64608
NUMA1	0.0766857	0.0981603
HSP90B1	0.115294	0.257848
FBXO22	0.286796	-0.834456
PTBP3	NaN	0
RPSA	3.7191	-3.01857
ISOC1	1.09583	1.5535
MRPL18	0.364586	-0.906739
CAV1	0.160818	-0.211724
RPL22	0.690913	-2.54955
MTA2	0.935775	-1.06237
OASL	1.96871	-2.44322
CAMK2G;CAMK2B	1.80293	2.49742
RBMX	1.99471	-2.18987
CAPZB	1.65116	3.18419
SEC23B	0.302772	0.798587
CASC3	1.65483	-0.841741
TARDBP;TDP43	NaN	0
ESF1	1.12766	-0.620334
NOL7	1.88356	-1.5974
CFL1	2.17683	1.03112
SMYD5	0.736538	1.19688
SMARCA1	0.438211	-0.6926
SPEN	1.67249	-2.8532
CHAMP1	0.32344	-0.0996966
NOL11	2.41156	-2.46428
USP10	0.337558	-0.632893
HNRNPA1;HNRNPA1L2	0.0255822	-0.0792885
TRIM56	0.616882	0.856523
CIRH1A	3.26994	-1.72435
COASY	1.49552	2.17968
PRPF19	0.817336	-1.10686
MAP4K4	0.371524	-0.886531
CORO1C	1.41024	0.89126
DNAJA1	0.546287	1.0943
PTMA	0.492416	-1.06911
CEBPZ	0.708261	1.15658
OTUB1	0.0258194	0.065196
CRKL	3.3925	1.62299
CSNK1D;CSNK1E	3.53185	1.92488
NOP16	2.89395	-2.59711
CSRP2	3.84235	1.56205
PGAM5	0.439624	-0.209929
CHD1	1.11981	-1.01449
RPL31	2.90099	-3.49361
ADRM1	0.0858725	-0.179042
HP1BP3	1.14011	-1.66173
RPS15A	2.50067	-2.78126
KAT7	2.0075	-1.15024
DNTTIP2	1.87949	-1.17534
CXorf67	2.90376	0.982806
DDX1	0.0161061	-0.039217
CYFIP1	0.547299	0.49476
DDX17	2.96183	1.30333
DDX18	2.21408	-0.806623
DDX3X;DDX3Y	3.53451	1.18837
CCT6A	0.0406804	-0.105116
DDX5	3.51793	1.17271
DDX54	0.0712375	-0.0657401
DPYSL3	2.00919	1.83977
EBNA1BP2	2.17615	-0.992333
EEF1A1;EEF1A1P5	1.82888	0.861773
RPS14	2.56081	-1.75452
EEF2	2.44709	0.964574
C15orf52	1.24845	-0.7524
ERH	1.5071	-0.865581
FASN	2.65281	0.968704
YWHAG	0.512511	0.427372
TRA2B	2.18496	-0.814349
PEF1	0.699603	1.62713
WDR43	2.66349	-1.4214
RRS1	0.48915	-1.19594
FLNB	1.96303	3.14009
NAT10	2.96965	-1.6442
LANCL1	0.539683	1.25235
MRPL21	0.722691	-1.02535
FN3KRP	4.76491	1.91449
ACLY	0.31603	0.278358
BANF1	1.42576	-1.07185
PPIG	1.30731	-0.873708
DDX54	0.884381	-0.362042
FTSJ3	2.48653	-1.12858
ACTN1	0.0939827	-0.321602
NOC4L	1.88931	-1.57096
FXR1	4.71648	1.83595
TRA2A	1.16348	-0.908359
APOBEC3B	0.608829	-0.379669
RNMT	0.0342597	-0.0942264
G6PD	3.23187	1.75617
GAPDH	1.89695	-2.48244
PWP2	2.99149	-1.30124
RPL9	2.86895	-1.67162
CCT2	0.337681	-0.479412
HEATR1	3.4342	-1.91816
CBX3	1.75891	-0.737898
SF1	0.584759	1.37819
CDC20	0.769161	0.940518
FTO	0.644515	1.11455
RNF213	0.0277513	0.0513954
RPS17	3.15244	-2.27219
EIF4E	1.1771	2.12327
APOBEC3C	0.873485	-0.342533
RPS4X	2.86313	-1.8296
RRP9	2.954	-1.17196
GART	3.1195	1.57698
UBTF	0.963442	-0.548789
TXNDC12	0.151687	0.451979
SON	0.123924	-0.233196
DBNL	1.11438	1.27941
GMPS	2.71968	1.32177
SURF6	2.19619	-0.618303
SAP18	2.37109	-1.32726
IMP3	1.85087	-1.30657
CENPB	2.24017	-0.843147
HNRNPA2B1	1.14322	-0.810892
EXOSC10	0.574317	-0.446565
FARSB	1.73917	0.909685
SKP1	0.176632	0.834054
PTK2	0.528968	0.608528
ZNF687	0.297452	-0.533045
LRRC59	0.845883	0.833036
TK1	0.434002	1.54519
TEAD4;TEAD2;TEAD1;TEAD3	0.310155	-0.679042
UTP6	2.87729	-1.36297
PPP1R12A	0.0633843	0.114758
NOL10	3.24377	-2.39501
CBX1	1.57962	-0.687199
WDR12	2.29872	-0.55301
RRM2B	0.705405	1.64197
RPS3A	3.18361	-1.78765
RPL5	2.2217	-0.945835
SRSF10	1.51867	-1.01736
SLC25A1	0.192377	-0.459133
SDHB	0.653417	1.35837
HIST2H3PS2	0.663392	-0.554806
NOP14	2.48641	-1.32723
RPS26;RPS26P11	3.47984	-2.02024
RPS5	2.71768	-0.915785
ARGLU1	0.49584	-1.65504
RPS19	1.90304	-0.749468
EIF4A3	2.34163	-1.30681
WHSC1	1.52925	-0.554433
IMP4	1.08449	-2.564
HNRNPK	1.94363	0.860794
ENO1	1.75866	-2.59901
RAB14	0.134741	0.266595
HNRNPM	1.16656	0.340353
CACYBP	1.23416	2.11042
HSPB1	0.0502208	-0.0515847
UTP14A	3.76717	-1.26052
PTMS	0.51868	-1.14061
UTP15	2.50711	-1.2492
MSN	0.349164	-0.771791
CBX5	0.71505	-0.397104
KPNB1	0.375111	0.311745
CHD4	0.00405178	0.00247431
NOLC1	1.04984	-0.448785
TLN1	0.492253	1.05646
UTP3	3.56705	-1.36482
RPL23A	3.45242	-1.49528
PNN	1.49873	-0.948377
SEC31A	0.832436	-0.558081
RHOA	1.31818	0.785213
BAZ1B	0.761775	-0.489879
RPS25	2.81397	-0.81834
UTP18	2.25299	-1.07286
WDR3	2.05453	-1.25644
MRPS6	1.15023	-0.47
ZC3H18	2.01082	-1.26866
RPL23	2.86524	-2.26177
ATXN2L	1.53501	1.04741
PHLDB1	0.954333	-1.15724
GSPT2;GSPT1	2.29801	2.71067
YWHAZ	0.186198	-0.234956
UBA6	0.253591	0.690318
RPS15	2.57336	-1.0943
HSD17B10	3.91736	1.45717
RBM8A	1.56412	-1.07965
HIST1H2BC	1.12556	-0.24202
UFM1	0.165238	0.14466
NKRF	0.950395	-0.435969
BRD1	0.230825	-0.507694
CSRP1	0.100466	0.175339
SUV39H1	1.52462	-1.02082
BAG3	0.44129	0.486907
MRTO4	0.0593202	-0.0454273
TRIM26	1.19495	-0.885534
YBX1	0.384794	0.171176
PHIP	0.605118	-0.329243
SRP9;DKFZp564M2223	2.48453	1.46723
MRPL4	0.463185	-0.863962
PARP2	2.25478	-0.906227
LARP1	0.426039	0.162342
RPLP0;RPLP0P6	2.19096	-1.00815
RPS18	2.55019	-0.807069
HNRNPC	0.515839	-0.249594
RPS3	1.98255	-0.761991
H2AFV;H2AFZ	2.03003	-0.490958
RPS11	2.78925	-1.84236
DHRS2	0.020054	-0.0202761
HSPA9	1.39822	0.44592
USP24	0.266772	0.555302
CCDC84	1.03545	2.10043
RPL11	2.57827	-1.0653
DNMT3A	0.0403286	-0.0231795
BCAP31	0.139386	0.401549
HDGFRP2	2.80759	-1.37003
NOL6	0.692217	-0.189894
AURKB	0.642686	0.444481
NAP1L1	3.08217	-1.56516
MRPL22	0.532089	-0.435165
WDR75	2.2823	-1.35253
RELA	1.06979	1.07555
MMTAG2	1.06186	-0.160581
DDX27	0.0742409	-0.237881
OCIAD2	0.230868	-0.446699
PARS2	0.344843	0.606791
RPS12	2.05286	-0.622268
RPLP2	2.48364	-0.718394
RPS23	3.03157	-1.3817
MRPS25	0.654635	-0.496561
HSPA1B;HSPA1A	0.453472	0.131029
HN1L	0.42614	0.991374
CAD	1.12871	0.434835
PFAS	5.27776	3.34288
MYL12A;MYL12B;MYL9	0.56136	0.207194
CMSS1	0.274213	0.613741
KRT18	0.741439	1.31452
TOP2A	2.07665	-0.94784
APOBEC3F	0.343185	-0.227678
SGOL1	0.185017	-0.111283
RPL18	2.35844	-0.654634
MAGOHB	1.60164	-1.01034
ZNF532	0.0134149	-0.00799084
TUBB	0.973125	0.447384
CYB5R3	0.769171	1.35539
CDCA8	1.04942	-0.550266
HIST2H3A;HIST1H3A;HIST3H3;H3F3B;H3F3A;H3F3C	0.170313	-0.0663939
WDR36	2.07513	-1.33796
BMS1	3.24138	-1.89995
CLTC	0.299489	0.235385
NOP56	2.27741	-1.17735
ZNF207	0.558241	1.06001
MYH9	1.98186	0.398304
RAB1A	0.300105	0.194818
RPL32	0.741119	-0.413341
PROSC	1.86048	0.970047
TBL3	1.5448	-1.01251
RPL35A	1.72808	-1.10869
RPS16	1.73499	-0.78722
WDR46	2.20122	-1.24719
PRDX6	1.72094	0.714993
RPS24	2.20222	-1.22857
CYC1	2.25481	0.843141
NOP58	1.94695	-0.847179
SEC61B	0.122923	0.267216
SNRPN;SNRPB	0.649286	-1.04543
IPO9	1.82231	1.59756
RPS20	1.72598	-0.504178
PIP5K1A;PIPSL	0.969263	0.920497
RARS	0.0285743	0.0499568
HUWE1	0.905071	0.676555
SCRIB	2.47414	2.15163
PDIA6	0.828879	0.613234
EXOSC4	0.135509	-0.196284
EEF1G	1.01804	1.7009
MRPS33	0.101682	0.0604577
CCT8	0.436183	0.385575
PPP2R1A	0.638036	0.238277
RPL8	2.03942	-0.533036
ATP5F1	0.747889	1.30385
ATP5B	1.26317	0.669485
CDC5L	1.49603	-0.316236
DHX36	1.75505	2.09512
CDC37	0.220728	-0.221752
RPL19	1.54965	-0.586162
XRN2	3.27511	0.508287
GAR1	0.798314	1.54023
CLTA	NaN	0
DDX10	1.02566	-1.05817
FAU	1.3144	-5.3145
ING4	1.51308	-2.76206
JADE1	0.83724	-1.15929
MRPL2	2.08233	-1.68202
RPS7	3.08965	-6.05628
HSPA14	NaN	0
RNPEP	NaN	0
ERI3	NaN	0
ZFP36L1	NaN	0
VRK2	NaN	0
UEVLD	NaN	0
DUSP3	NaN	0
CAPZA2	NaN	0
PTGES3	0.14714	-0.219086
PKM	0.0688139	-0.046351
PRPF8	0.0214431	0.011734
RAB2A;RAB2B	0.978256	0.992977
PPIA	2.47949	0.877724
EMG1	2.30335	-1.60078
RPS27	2.27335	-1.57935
IBA57	3.62198	3.7529
RPL26L1	1.93392	-0.785017
SNRNP70	0.839611	-0.190711
UBE2L6	1.52274	3.4357
HDAC10	0.0947648	-0.414332
RCL1	2.62412	-1.38028
RPL15	4.129	-0.673059
DHX15	1.46279	0.146385
LMNB1	0.363743	0.274619
MRPS27	0.165482	-0.111219
SRP72	0.203489	0.49339
ACTG1;ACTB	1.1133	0.533186
HDAC6	2.24568	0.83293
SF3B1	0.652965	0.36774
TPM3	2.26829	0.958839
GNAS	0.842711	1.17633
SMARCA5	1.20717	-0.449376
ILF2	0.184745	-0.372015
RPL28	2.08833	-0.54958
CANX	0.73544	0.395164
HADHA	1.383	0.801745
CCT7	0.190018	0.179109
SCD	0.0483687	0.0543127
LMNA	0.989939	0.751663
PML	2.98498	1.10247
UBLCP1	0.975583	1.59498
MRPL39	0.445087	0.344103
RPL26	3.87594	-0.717667
RPL7A	3.12269	-0.602737
MYL6	0.724511	0.433855
MRPL15	0.544752	-1.10208
RUVBL1	0.314707	0.579875
MRPS14	0.405772	0.173602
MRPS28	1.73335	-0.306349
RPL24	2.61632	-1.52401
MRPS34	0.71324	-0.224236
DAP3	0.273264	-0.117494
RPL17;RPL17-C18orf32	2.27098	-1.14487
NPM1	0.212367	-0.0652428
RPL12	1.04093	-0.529445
RPS8	0.276687	-0.119892
ABHD14B	1.71449	1.46751
RTCB	1.80125	1.57686
MIF	1.79674	1.20189
PHB2	0.927341	0.371447
DYNC1H1	0.786277	0.616826
TAGLN2	0.990981	0.55492
RPS6	1.96108	-0.677879
CTPS1	3.53179	1.17319
H2AFY2	0.613332	-0.147991
EFHD2	0.177147	-0.367679
PSMC5	4.38207	1.84682
H2AFY	0.501415	-0.106672
RPL13A;RPL13a	2.00614	-0.61783
KIF5B;KIF5A	0.859255	0.864647
IPO5	0.873066	1.97658
BAG2	1.56083	-0.750602
PTPN11	2.24412	2.54211
MDN1	0.0377002	0.0960765
MKI67	2.08723	1.3027
SAFB	1.08592	0.324197
RAN	0.361403	0.239383
CBX4	0.129169	0.265481
STAT3	0.689366	4.05917
RPL3	2.81212	-0.631374
NME1-NME2;NME2;NME1	1.21686	0.823781
DHX9	0.460733	-0.317636
RBBP4;RBBP7	0.729246	-1.57745
MRPS31	0.0645389	0.0373311
HNRNPU	0.0573269	0.0508718
HSPA8	2.39988	0.546118
HDAC2	1.22501	0.260432
YTHDF2	0.135631	0.25215
SRSF3	1.7114	-1.46379
CTTN	2.76835	0.899407
ELMSAN1	1.91662	1.72422
SCAF1	1.20146	-0.581651
RPS2	2.08426	-1.18801
RPL30	2.36401	-0.642756
RPL13	2.86564	-0.548234
RPL18A	2.43672	-0.769629
SLC25A3	1.90628	0.68313
TUBA1A;TUBA1B	2.05393	0.680092
RPN1	1.54627	0.692572
RPL35	1.16635	-0.615384
RPL27	2.19252	-0.561864
SPATS2L	2.99826	0.831443
RPS9	1.33255	-0.35588
TUBB4B	2.84857	0.69917
HIST2H2BE	0.395642	-0.158013
RPL6	2.41541	-0.61533
GARS	1.13192	1.58419
ATP5A1	1.33639	0.731067
PSME2	2.11242	1.32276
C8orf33	1.21348	0.986563
PELO	3.0937	1.13121
SLC25A5	2.17128	0.790432
HSP90AB1	0.0314183	-0.0316033
HSP90AA1	0.361634	-0.556599
TUBB6	2.99445	0.755403
HNRNPA3	2.49982	1.21644
PRKDC	1.97115	0.88005
NOP2	4.04108	-1.04398
HNRNPF	3.8286	1.20771
MRPS23	0.178918	-0.0507679
DNAJC7	0.1113	0.266558
MRPS26	0.479397	0.28552
MRPS9	0.406069	-0.221657
RAB5C	1.45385	0.653364
MARS	0.235654	0.219905
RPL7	1.72937	-0.444087
PTPN23	1.93047	0.968091
HAT1	1.89438	2.77871
CNN3	2.76294	1.0126
RPL14	1.01851	-0.467134
TUBB2B	2.68143	0.799875
HSPD1	1.85312	0.92029
RPL36AL	2.83771	-1.23853
PDCD6IP	0.855781	1.29336
MOV10	1.59925	-0.479869
CSE1L	1.25908	0.629286
PTBP1	1.9653	0.975348
MRPS5	0.0665531	0.0448761
CCT3	1.27989	0.762408
UTP11L	1.14675	-0.876048
HSPA5	1.31446	0.407608
MRPL28	0.0269268	0.0219197
RBM39	0.932733	-0.41153
PTCD3	0.421432	-0.122454
SRM	1.31603	1.80248
SF3B3	0.0998593	0.0480547
FSCN1	0.741196	0.876216
RAB7A	1.62037	0.843775
RPS13	3.14643	-1.33481
PBK	0.112697	-0.245226
RPL36	1.65953	-0.494546
MRPS7	0.122336	0.0294309
NES	1.6916	2.47168
CBS	1.09275	0.897772
INCENP	1.77807	-0.521358
IQGAP1	1.10634	1.62364
KHDRBS1	2.02696	1.35511
MRPS11	0.219275	0.069026
MATR3	2.09743	0.594097
TCP1	0.604329	1.42285
ATP5O	0.968513	1.61746
PRDX5	1.38713	2.81809
PDAP1	0.345169	-0.341033
LYPLA2	1.54373	2.86769
HIST1H4A	0.515892	0.200076
XPO1	0.700284	1.74436
DUT	2.38144	1.26183
NUFIP2	0.292061	0.236451
PFN2	4.57792	1.30191
UTP20	2.07235	-1.42984
KANK2	1.23478	-1.39626
MRPS35	0.448229	-0.201327
MRPL20	0.034679	0.0137115
KHSRP	2.27032	0.834218
NDUFS3	0.21097	0.27106
CHORDC1	1.98725	2.7897
KIF2C	1.69555	2.85232
TCEAL3	0.348658	-0.493835
KLHDC8B	2.33397	2.98292
TUBA3E	0.161571	0.351054
MRPS2	0.184947	0.100849
MYD88	1.58401	3.76296
LAS1L	1.72161	-0.704596
MAGED2	0.99012	2.19088
LDHB	3.21777	-4.73768
MAGEA4	2.49267	1.00929
HLA-A	1.50147	0.741009
TXN	0.814971	3.11212
MAP4	3.2598	1.53458
MAT2A	1.4847	3.33562
MRPL17	0.51546	0.981457
NCKAP1	2.03914	1.49024
FLNC	0.755886	1.26259
PSME1	2.71447	1.24735
RPL27A	0.970701	-0.92095
FLNA	1.74167	1.00951
TNS3	3.56058	2.3097
ZC3HAV1L	1.0104	2.94673
NUP155	1.38741	2.28338
PRDX3	1.45556	2.63906
UQCRQ	0.66701	0.78898
NUDC	2.21227	2.27522
UPP1	1.85445	0.686197
MCM3	3.09043	1.14392
SIAH1	0.50712	1.54378
TRIM28	0.263658	-0.622273
MCM5	2.96938	1.2987
IPO7	1.38353	0.737019
HIST1H2AJ;HIST1H2AH;H2AFJ;HIST1H2AG;HIST1H2AD	0.180808	0.126348
HNRNPL	2.62789	1.32829
MPHOSPH10	2.8894	-1.5576
MRPL13	0.433115	0.125095
LMNB2	0.882793	1.99911
RPL10	2.33562	-0.92925
FBL	1.54415	-0.680829
MRPL23	0.582259	1.00251
SRP68	1.33281	0.721987
MRPL24	1.1946	0.36482
MRPL3	1.4632	0.382751
SYNCRIP	0.357413	-0.736183
LARP4	0.0137191	-0.0206075
MRPL37	0.042899	-0.0134001
DCTPP1	0.870822	0.585101
UQCRC2	1.17604	0.869338
MRPL47	0.325793	0.625992
PHGDH	1.43922	0.758393
RPL34	1.50577	-0.558454
MTCH2	0.260098	0.73665
MRPS15	0.383979	0.191203
CARS	2.4404	1.2044
GPD2	1.222	2.18365
SH3GL1	1.86684	2.46539
HNRNPH1	2.59488	1.45946
MRPS18A	0.23223	-0.097137
VIM	0.581888	0.323491
CIT	0.184909	0.172276
RPN2	0.683237	1.63971
ATP1A1	1.11253	0.99137
RAB11B;RAB11A	0.746183	0.982214
MRPS22	0.0431868	0.0160389
MTHFD1	2.2633	0.955329
MTHFD1L	2.18517	1.29141
VAPA	1.28444	2.71076
H1F0	2.35812	-1.0714
HDGF	2.07973	1.10846
MRPS18B	0.87503	0.157841
NFKB2	1.56325	2.14402
MTPN	1.5682	2.36161
NGDN	3.30425	-1.77619
NKTR	1.48006	-0.92095
RPL38	0.113556	0.0797882
NOL9	0.950031	-0.562028
LGALS1	2.92765	1.23946
NUDT16L1	2.87567	2.77073
OCIAD1	1.3799	1.33081
OPA1	3.66899	2.59334
OSBPL10	0.163762	-0.329568
PRRC2A	0.850596	0.617595
VDAC2	2.5292	1.09253
CTNND1	1.96838	0.728123
HIST2H2AB	0.0453692	0.417343
PALLD	2.59881	1.80526
PARK7	2.98618	1.29401
TRIM25	1.50193	2.53171
RB1	0.0525861	-0.105378
PCBP1	0.850691	2.10523
EIF4B	0.0340478	0.11366
GPATCH8	0.693202	-0.507856
TPT1;TPT1P8	0.0647746	0.195649
DDX50	0.828482	-1.37906
CSTB	2.48915	1.58543
RECQL	2.91646	1.69178
PCBP2	2.88543	1.47862
LANCL2	2.16448	1.74135
LLPH	2.43988	-0.69699
ATP5C1	1.19164	2.10706
DDX47	1.95711	0.987396
PELP1	2.08231	-0.830129
PES1	1.70117	-0.695624
HIST1H1E;HIST1H1D	0.2424	-0.22116
EEF1A2	0.268447	0.961485
HIST1H1C	0.243735	1.24678
TSPYL5	2.13106	1.50471
TRIP12	2.21679	1.29179
PFN1	0.886414	-1.34173
RSL1D1	0.676069	-0.482068
PHB	1.3356	0.555973
UBA1	1.38562	0.717454
SEC24C	1.92819	2.19051
BUB3	0.5831	1.89164
PLIN3	1.47086	2.79555
PLS3	1.41244	3.91451
POGZ	1.1238	-0.462441
MPP6	0.83718	1.16822
DPYSL2	2.96723	1.49002
PRDX1	3.71594	1.45524
PRDX2	2.88499	1.85317
PSIP1	0.139793	0.273545
RBM12B	0.102342	0.0800385
MARCKSL1	1.10802	-0.941946
MRPL45	0.381717	-0.792125
PDCD6	1.66945	1.63804
RCC2	3.17144	1.21241
SMARCC1	1.24059	1.53382
RPL29	0.268921	0.208453
ATP5L	0.320934	0.519872
CPOX	0.235622	0.526793
RNPS1	2.5572	-1.28341
DHX30	0.159355	-0.098412
PRPF31	0.0769761	0.135045
CBX2	1.43586	0.718902
C11orf98	1.64367	-3.64265
PPME1	0.25732	0.442264
DARS	1.34473	1.69081
MRPL12	0.684851	-0.205055
MRPL41	0.675669	0.537805
RPL10A	1.12606	-0.361174
PLEC	1.45925	-0.585927
TMPO	0.32029	0.827011
RPL21	1.69377	-0.491981
RPL4	2.2967	-0.49186
GADD45GIP1	0.964841	-1.06132
RPL7L1	2.08163	-0.432729
CAPZA1	3.48695	1.87378
MRPS10	0.758517	0.192013
PABPC1;PABPC3	0.135884	-0.30409
DBN1	1.80921	2.16635
PARP1	1.65667	-0.948692
ZNF638	0.913785	0.438381
OGFR	3.70052	1.65896
RPL37A	0.0120059	-0.00825977
RPS10;RPS10-NUDT3	3.28479	-1.0476
RPS27A;UBC;UBB;UBA52	1.59843	0.979383
ACTA1;ACTC1;ACTG2;ACTA2	0.919233	2.84394
RRP12	3.1755	-1.28577
NASP	0.996232	1.53149
HPRT1	1.96653	2.24988
S100A10	1.26655	1.73301
MAGEB2	0.36238	0.275887
ACSL3	0.621743	0.487926
SERBP1	1.01059	0.483443
UQCRC1	1.66623	2.74735
RUVBL2	0.800483	1.31473
PRMT1	0.0436096	0.139533
SFN	0.772396	1.32265
SRP14	2.94153	1.3725
SRSF4	0.820731	-0.508826
STRAP	1.48819	1.43121
PAICS	0.248345	-0.810365
SHC1	0.72344	1.87938
SRRM1	2.1831	-0.98062
VDAC1	0.956866	0.807082
SRRM2	0.577856	-0.195085
HSPH1	1.70004	0.954526
SEC23IP	0.995458	1.00518
SNRPG;SNRPGP15	1.30677	1.96242
HADHB	0.994033	1.47066
CAND1	0.915586	1.82539
MVD	2.12813	1.35029
KIF23	0.264373	0.348655
SRSF6	2.64134	-1.6727
SRSF7	1.95739	-0.903863
SRSF9	1.77421	-1.10011
SRSF5	0.648235	-0.73431
SMAP1	1.81769	3.06403
SSRP1	2.58048	-1.49812
ATL3	0.0607324	0.0953884
FAM49B	1.39809	1.58962
CALD1	2.87666	1.5801
CHMP1A	0.600258	1.85386
TFPI	1.66895	2.20179
STAT1	1.47069	1.84684
FARSA	3.16475	2.34932
DNAJA2	0.570248	0.745115
DDOST	1.00637	0.368233
ARFGAP3	1.1252	0.791731
KPNA2	0.247307	0.263263
MRPL14	0.139107	0.0747771
GANAB	0.413662	0.517375
IDH3B	0.417444	0.585088
CCT5	0.00450964	0.0121999
RRP7A	0.439329	-0.152237
ARL1	1.7505	2.01737
TCEB2	6.30335	3.76101
GMDS	1.85745	1.42465
ANLN	1.58121	0.816608
ACACA	1.41784	1.79235
UBXN1	1.84326	1.85015
STT3A	1.16607	0.958075
TEX10	1.81991	-0.979906
ZNF280C	0.892093	-1.29596
TNPO1	0.823933	0.858087
SERPINH1	0.263118	0.57282
ELAVL1	1.50859	2.32894
SLC25A13	0.687868	1.13992
MRPL9	0.518489	1.24828
PPP2CA;PPP2CB	1.5202	1.34637
MOCS2	3.8904	2.14848
CAPNS1	1.28394	1.90514
SNRPD2	0.525465	0.319534
DNAJC9	0.370792	0.346576
C14orf166	0.34622	0.777894
BCAT1	1.04803	1.22985
TSG101	1.27583	2.2035
SLC25A6	0.314193	0.530241
MRPL44	1.20625	-0.379882
CT45A3;CT45A1;CT45A2;CT45A9;CT45A8;CT45A7;CT45A10;CT45A5;CT45A6	0.906357	1.29318
SSR4	0.0153516	-0.0424542
RAB18	0.753684	1.17173
SNX1	1.88152	2.54211
DKC1	0.122616	0.0574398
LUC7L2	1.60344	-0.904266
FAM120A	1.80692	3.24772
RAB34	2.65003	2.15562
MRPL19	0.481233	-0.192567
SEC23A	1.74045	2.03175
TXLNA	1.07264	1.62687
PSMD9	1.69526	1.24894
PPP2R2A	0.359294	0.835324
HIST1H1A	2.02041	-0.747401
SMC4	0.639865	1.85329
CNN2	0.25352	1.1317
SNW1	0.843761	1.68772
RWDD2B	0.639435	0.771744
ATOX1	0.872026	2.53073
FOXK1	1.13948	1.07221
MSH2	0.702616	1.91419
TOP2B	0.533076	-0.22882
GNL3	0.768131	-0.626665
MRPS17;hCG_1984214	0.297375	-0.258037
DYNC1I2	0.802732	0.798978
CTBP2;CTBP1	0.175258	0.366787
NTPCR	0.996766	1.54059
RRM1	2.31033	3.12127
SDHA	2.60931	3.69862
SEC22B	1.13864	0.779054
ARF4	1.1555	2.14343
PDLIM4	1.78516	2.57188
GSR	0.700022	1.31832
PGRMC1	0.0242124	0.10972
RTN4	0.175694	0.372566
CARM1	0.982219	1.49593
MRPL38	0.0889007	-0.0375838
GNB1L	1.68658	1.74319
HLA-B	1.69683	3.13901
TBCB	1.35305	1.67185
TIGAR	2.2958	1.17724
UBE2L3	0.792543	1.08583
GTPBP4	0.683102	-1.18244
RPS29	0.319409	1.56689
THRAP3	1.67857	-0.85859
TSPYL2	2.40225	-1.43237
GRB2	1.27189	2.57036
AMPD2	0.86118	1.85743
NFU1	2.17608	2.04325
TUFM	1.71284	1.14954
PFKP	1.08694	2.26112
YWHAQ	0.621937	1.90782
USP5	2.27287	1.3701
RAB1B	0.843647	1.43712
GSDMD	2.88737	4.27969
MRPS21	0.513067	-0.329215
OLA1	0.612617	1.4443
VPS28	1.69224	2.06503
WDR18	1.70273	-0.823553
WDR55	2.01719	-1.00366
WIZ	0.777532	-0.20332
YBX3	1.23483	0.322474
YTHDC1	1.72144	-1.15358
UBE2D3;UBE2D2	6.81384	5.41564
RPS28	0.521832	-2.46559
YTHDF1	2.45358	1.31989

## Sheet: Figure 1i
Survival (Illudin S)
U2OS(FRT)	Exp-1			Exp-2			Exp-1+2
	Rep_1	Rep_2	Mean	Rep_1	Rep_2	Mean	Mean
0 pg/mL	98.5743	101.426	100	102.055	97.9452	100	100
50 pg/mL	82.0095	84.4535	83.2315	97.6027	105.137	101.37	92.3007
100 pg/mL	80.3802	77.9362	79.1582	77.3973	77.1689	77.2831	78.2206
U2OS(FRT) ELOF1-KO (3-12)	Exp-1			Exp-2			Exp-1+2
	Rep_1	Rep_2	Mean	Rep_1	Rep_2	Mean	Mean
0 pg/mL	94.9891	105.011	100	101.832	98.1685	100	100
50 pg/mL	64.2702	64.488	64.3791	65.2015	71.0623	68.1319	66.2555
100 pg/mL	18.7364	20.4793	19.6078	24.6642	20.757	22.7106	21.1592
U2OS(FRT) ELOF1-KO (3-12) + ELOF1-GFP-N1	Exp-1			Exp-2			Exp-1+2
	Rep_1	Rep_2	Mean	Rep_1	Rep_2	Mean	Mean
0 pg/mL	103.407	96.5932	100	100.773	99.2272	100	100
50 pg/mL	93.2532	97.2612	95.2572	92.4266	103.864	98.1453	96.7012
100 pg/mL	94.0548	89.5124	91.7836	89.0263	86.9655	87.9959	89.8897
U2OS(FRT) ELOF1-KO (3-12) + ELOF1 S72K/D73K-GFP	Exp-1			Exp-2			Exp-1+2
	Rep_1	Rep_2	Mean	Rep_1	Rep_2	Mean	Mean
0 pg/mL	106.748	93.2515	100	97.2973	102.703	100	100
50 pg/mL	80.5726	72.5971	76.5849	74.348	73.5894	73.9687	75.2768
100 pg/mL	47.1711	31.6292	39.4001	37.5533	33.1911	35.3722	37.3862
