# Supplementary material for: ELOF1 is a transcription-coupled DNA repair factor that directs RNA polymerase II ubiquitylation
Source: Springer Nature journal article supplement (doi:10.1038/s41556-021-00688-9), 2021-06-01
Supplement: MOESM6 [file 41556_2021_688_MOESM6_ESM.xlsx]

## Sheet: Figure 2a
GENE	sumZ	numObs	normZ	pval_synth	rank_synth	fdr_synth	pval_supp	rank_supp	fdr_supp	Log2_FoldChange	-Log10(p)
SACS	-56.47	12	-10.74	3.26e-27	1	5.89e-23	1	18056	1	-1.831	26.49
INTS12	-37.09	12	-7.07	7.86e-13	2	7.09e-09	1	18055	1	-1.483	12.1
SUPT4H1	-36.05	12	-6.87	3.19e-12	3	1.92e-08	1	18054	1	-1.728	11.5
CNOT4	-35.36	12	-6.74	7.9e-12	4	3.57e-08	1	18053	1	-0.757	11.1
DHX35	-34.96	12	-6.66	1.34e-11	5	4.83e-08	1	18052	1	-1.351	10.87
PPIL1	-32.64	12	-6.22	2.42e-10	6	7.29e-07	1	18051	1	-0.908	9.62
LEO1	-31.88	12	-6.08	6.03e-10	7	1.55e-06	1	18050	1	-1.03	9.22
GPX4	-29.75	12	-5.68	6.91e-09	8	1.56e-05	1	18049	1	-1.099	8.16
LMNB1	-29.39	12	-5.61	1.03e-08	9	2.07e-05	1	18048	1	-1.023	7.99
CTR9	-27.92	12	-5.33	4.92e-08	10	8.88e-05	1	18047	1	-1.058	7.31
BRD2	-27.18	12	-5.19	1.06e-07	11	0.000174	1	18046	1	-1.097	6.97
SMARCA4	-26.37	12	-5.04	2.38e-07	12	0.000358	1	18045	1	-0.767	6.62
SNAP29	-25.51	12	-4.87	5.53e-07	13	0.000767	1	18044	1	-0.961	6.26
PAX6	-24.81	12	-4.74	1.07e-06	14	0.00138	1	18043	1	-1.233	5.97
IGF1R	-24.52	12	-4.68	1.4e-06	15	0.00162	1	18042	1	-0.967	5.85
PPIE	-24.49	12	-4.68	1.44e-06	16	0.00162	1	18041	1	-1.115	5.84
ARID1A	-23.86	12	-4.56	2.57e-06	17	0.00273	1	18040	1	-0.561	5.59
TBC1D7	-22.29	12	-4.26	1.01e-05	18	0.0102	1	18039	1	-0.433	5
GSK3B	-21.15	12	-4.05	2.6e-05	19	0.0247	1	18038	1	-0.544	4.59
AAAS	-20.98	12	-4.01	2.98e-05	20	0.0269	1	18037	1	-0.654	4.53
NELFE	-20.71	12	-3.96	3.7e-05	21	0.0318	1	18036	1	-0.664	4.43
PHF12	-20.36	12	-3.9	4.9e-05	22	0.0403	1	18035	1	-0.608	4.31
MAP2K5	-19.22	12	-3.68	0.000117	23	0.0916	1	18034	1	-0.578	3.93
TRIO	-19.1	12	-3.66	0.000127	24	0.0946	1	18033	1	-0.552	3.9
INTS6	-19.06	12	-3.65	0.000131	25	0.0946	1	18032	1	-1.564	3.88
SNAP23	-18.95	12	-3.63	0.000143	26	0.0991	1	18031	1	-0.555	3.84
FUBP3	-18.79	12	-3.6	0.000161	27	0.107	1	18030	1	-0.484	3.79
NELFA	-18.72	12	-3.58	0.000169	28	0.109	1	18029	1	-0.8	3.77
FZR1	-18.42	12	-3.53	0.000209	29	0.13	1	18028	1	-0.356	3.68
SCAF8	-18.37	12	-3.52	0.000217	30	0.131	1	18027	1	-0.509	3.66
AHCTF1	-18.31	12	-3.51	0.000226	31	0.132	1	18026	1	-0.53	3.65
RPRD2	-18.26	12	-3.5	0.000234	32	0.132	1	18025	1	-0.706	3.63
LMNA	-18.15	12	-3.48	0.000254	33	0.139	1	18024	1	-0.696	3.6
OR52W1	-17.78	12	-3.41	0.000329	34	0.175	1	18023	1	-0.403	3.48
RNF41	-17.28	12	-3.31	0.000464	35	0.24	1	18022	1	-0.344	3.33
B4GALT5	-17.21	12	-3.3	0.000485	36	0.243	1	18021	1	-0.408	3.31
GALNT6	-16.82	12	-3.22	0.000631	37	0.308	0.999	18020	1	-0.378	3.2
PHF2	-16.72	12	-3.21	0.000671	38	0.319	0.999	18019	1	-0.498	3.17
SUPT6H	-16.65	12	-3.19	0.000707	39	0.327	0.999	18018	1	-0.937	3.15
TCEA1	-16.27	12	-3.12	0.000901	40	0.407	0.999	18017	1	-0.438	3.05
NCOR1	-15.88	12	-3.05	0.00115	41	0.508	0.999	18016	1	-0.388	2.94
CDC73	-15.8	12	-3.03	0.00122	42	0.523	0.999	18015	1	-0.718	2.91
SZT2	-15.62	12	-3	0.00136	43	0.561	0.999	18014	1	-0.407	2.87
SUDS3	-15.61	12	-3	0.00137	44	0.561	0.999	18013	1	-0.288	2.86
ZFP36L1	-15.41	12	-2.96	0.00155	45	0.623	0.998	18012	1	-0.552	2.81
TARDBP	-15.3	12	-2.94	0.00166	46	0.64	0.998	18011	1	-0.863	2.78
PPP2CA	-15.29	12	-2.94	0.00167	47	0.64	0.998	18010	1	-0.388	2.78
CASC5	-15.17	12	-2.91	0.00179	48	0.666	0.998	18009	1	-0.574	2.75
SMARCB1	-15.16	12	-2.91	0.00181	49	0.666	0.998	18008	1	-0.376	2.74
ITPKA	-15.05	12	-2.89	0.00193	50	0.696	0.998	18007	1	-0.253	2.71
KCND3	-14.84	12	-2.85	0.00219	51	0.777	0.998	18006	1	-0.374	2.66
TOR1AIP1	-14.63	12	-2.81	0.00248	52	0.86	0.998	18005	1	-0.39	2.61
INTS8	-14.53	12	-2.79	0.00263	53	0.886	0.997	18004	1	-0.378	2.58
NPRL2	-14.52	12	-2.79	0.00265	54	0.886	0.997	18003	1	-0.555	2.58
WEE1	-14.48	12	-2.78	0.00271	55	0.89	0.997	18002	1	-0.763	2.57
INTS5	-14.44	12	-2.77	0.00276	56	0.891	0.997	18001	1	-0.791	2.56
NUP98	-14.4	12	-2.77	0.00284	57	0.901	0.997	18000	1	-0.605	2.55
MKLN1	-14.33	12	-2.75	0.00295	58	0.909	0.997	17999	1	-0.477	2.53
ASAP1	-14.27	12	-2.74	0.00307	59	0.909	0.997	17998	1	-0.421	2.51
GAN	-14.22	12	-2.73	0.00315	60	0.909	0.997	17997	1	-0.441	2.5
WDR61	-14.21	12	-2.73	0.00317	61	0.909	0.997	17996	1	-1.201	2.5
PDS5B	-14.09	12	-2.71	0.00338	62	0.909	0.997	17995	1	-0.447	2.47
TEN1	-14.09	12	-2.71	0.0034	63	0.909	0.997	17994	1	-0.572	2.47
TRAF2	-14.03	12	-2.7	0.00351	64	0.909	0.996	17993	1	-0.133	2.45
ATL3	-13.98	12	-2.69	0.00361	65	0.909	0.996	17992	1	-0.425	2.44
MDH2	-13.94	12	-2.68	0.00369	66	0.909	0.996	17991	1	-0.417	2.43
RFWD2	-13.87	12	-2.67	0.00384	67	0.909	0.996	17990	1	-0.349	2.42
NUP188	-13.85	12	-2.66	0.00388	68	0.909	0.996	17989	1	-0.382	2.41
NCAN	-13.84	12	-2.66	0.00392	69	0.909	0.996	17988	1	-0.606	2.41
EP300	-13.83	12	-2.66	0.00392	70	0.909	0.996	17987	1	-0.268	2.41
PACS1	-13.82	12	-2.66	0.00394	71	0.909	0.996	17986	1	-0.243	2.4
PFKFB4	-13.65	12	-2.62	0.00435	72	0.909	0.996	17985	1	-0.288	2.36
YAF2	-13.62	12	-2.62	0.00442	73	0.909	0.996	17984	1	-0.291	2.35
POMP	-13.59	12	-2.61	0.00449	74	0.909	0.996	17983	1	-0.185	2.35
RTF1	-13.56	12	-2.61	0.00457	75	0.909	0.995	17982	1	-0.426	2.34
HOXC8	-13.54	12	-2.6	0.00463	76	0.909	0.995	17981	1	-0.439	2.33
LSM12	-13.43	12	-2.58	0.00491	77	0.909	0.995	17980	0.999	-0.566	2.31
NUP50	-13.37	12	-2.57	0.00507	78	0.909	0.995	17979	0.999	-0.482	2.29
MED25	-13.24	12	-2.55	0.00544	79	0.909	0.995	17978	0.999	-0.224	2.26
B2M	-13.2	12	-2.54	0.00556	80	0.909	0.994	17977	0.999	-0.274	2.25
ACVRL1	-13.17	12	-2.53	0.00565	81	0.909	0.994	17976	0.999	-0.462	2.25
NOSIP	-13.16	12	-2.53	0.00569	82	0.909	0.994	17975	0.999	-0.582	2.24
AKIRIN2	-13.16	12	-2.53	0.00569	83	0.909	0.994	17974	0.999	-0.626	2.24
GJD2	-13.13	12	-2.53	0.00577	84	0.909	0.994	17973	0.999	-0.453	2.24
UBE4B	-13.12	12	-2.52	0.0058	85	0.909	0.994	17972	0.999	-0.457	2.24
SUPT5H	-13.01	12	-2.5	0.00616	86	0.909	0.994	17971	0.999	-0.274	2.21
CSNK2A1	-11.24	9	-2.5	0.00625	87	0.909	0.994	17970	0.999	-0.464	2.2
TLX1NB	-12.95	12	-2.49	0.00636	88	0.909	0.994	17969	0.998	-0.441	2.2
SENP2	-12.87	12	-2.48	0.00665	89	0.909	0.993	17968	0.998	-0.399	2.18
MAPK7	-12.86	12	-2.48	0.00666	90	0.909	0.993	17967	0.998	-0.597	2.18
PAXIP1	-12.86	12	-2.47	0.00668	91	0.909	0.993	17966	0.998	-0.432	2.18
OR4D11	-12.85	12	-2.47	0.00672	92	0.909	0.993	17965	0.998	-0.368	2.17
SMARCC1	-12.61	12	-2.43	0.00762	93	0.909	0.992	17964	0.997	-0.182	2.12
TIPARP	-12.59	12	-2.42	0.00771	94	0.909	0.992	17963	0.997	-0.816	2.11
LPAR3	-12.53	12	-2.41	0.00793	95	0.909	0.992	17962	0.997	-0.123	2.1
TXNDC15	-12.52	12	-2.41	0.00799	96	0.909	0.992	17961	0.997	-0.443	2.1
TMPRSS6	-12.39	12	-2.38	0.00856	97	0.909	0.991	17960	0.997	-0.434	2.07
SLC52A3	-12.32	12	-2.37	0.00884	98	0.909	0.991	17959	0.997	-0.265	2.05
SLC2A6	-12.3	12	-2.37	0.00892	99	0.909	0.991	17958	0.996	-0.293	2.05
SNRNP40	-12.29	12	-2.37	0.00899	100	0.909	0.991	17957	0.996	-0.459	2.05
C6orf52	-12.26	12	-2.36	0.00914	101	0.909	0.991	17956	0.996	-0.383	2.04
ATP13A1	-12.21	12	-2.35	0.00935	102	0.909	0.991	17955	0.996	-0.402	2.03
CEP85L	-12.19	12	-2.35	0.00948	103	0.909	0.991	17954	0.996	-0.244	2.02
C17orf96	-12.11	12	-2.33	0.00987	104	0.909	0.99	17953	0.996	-0.505	2.01
PARVA	-12.1	12	-2.33	0.00988	105	0.909	0.99	17952	0.996	-0.461	2.01
TBL1XR1	-12.1	12	-2.33	0.00989	106	0.909	0.99	17951	0.996	-0.416	2
PSMF1	-12.09	12	-2.33	0.00995	107	0.909	0.99	17950	0.996	-0.284	2
DHRS3	-12.07	12	-2.33	0.01	108	0.909	0.99	17949	0.996	-0.374	2
INPPL1	-12.01	12	-2.31	0.0104	109	0.909	0.99	17948	0.996	-0.241	1.98
BRK1	-12	12	-2.31	0.0104	110	0.909	0.99	17947	0.996	-0.453	1.98
YPEL1	-12	12	-2.31	0.0104	111	0.909	0.99	17946	0.996	-0.236	1.98
MORF4L2	-11.97	12	-2.31	0.0105	112	0.909	0.989	17945	0.996	-0.524	1.98
TMPO	-11.96	12	-2.3	0.0106	113	0.909	0.989	17944	0.996	-0.428	1.97
ING3	-11.87	12	-2.29	0.0111	114	0.909	0.989	17943	0.995	-0.386	1.95
GSX1	-11.82	12	-2.28	0.0114	115	0.909	0.989	17942	0.995	-0.355	1.94
HLA-DQB2	-11.81	12	-2.28	0.0114	116	0.909	0.989	17941	0.995	-0.359	1.94
NDC1	-11.81	12	-2.28	0.0114	117	0.909	0.989	17940	0.995	-0.674	1.94
NDUFS6	-11.8	12	-2.27	0.0115	118	0.909	0.989	17939	0.995	-0.364	1.94
GAL3ST3	-11.78	12	-2.27	0.0116	119	0.909	0.988	17938	0.995	-0.375	1.94
TRIM27	-11.73	12	-2.26	0.0119	120	0.909	0.988	17937	0.995	-0.391	1.92
MON1B	-11.72	12	-2.26	0.0119	121	0.909	0.988	17936	0.995	-0.24	1.92
STRIP1	-11.66	12	-2.25	0.0123	122	0.909	0.988	17935	0.994	-0.31	1.91
CYFIP1	-11.65	12	-2.25	0.0124	123	0.909	0.988	17934	0.994	-0.491	1.91
PAN2	-11.65	12	-2.25	0.0124	124	0.909	0.988	17933	0.994	-0.463	1.91
CDK6	-11.64	12	-2.24	0.0124	125	0.909	0.988	17932	0.994	-0.28	1.91
NIPA2	-11.64	12	-2.24	0.0125	126	0.909	0.988	17931	0.994	-0.348	1.9
DNAJC17	-11.6	12	-2.24	0.0127	127	0.909	0.987	17930	0.994	-0.207	1.9
GGNBP2	-11.59	12	-2.23	0.0128	128	0.909	0.987	17929	0.994	-0.241	1.89
TMEM106C	-11.58	12	-2.23	0.0128	129	0.909	0.987	17928	0.994	-0.315	1.89
TMOD3	-11.58	12	-2.23	0.0128	130	0.909	0.987	17927	0.994	-0.28	1.89
BUB1B	-11.58	12	-2.23	0.0129	131	0.909	0.987	17926	0.994	-0.504	1.89
PLK2	-11.57	12	-2.23	0.0129	132	0.909	0.987	17925	0.994	-0.181	1.89
NUCB2	-11.56	12	-2.23	0.0129	133	0.909	0.987	17924	0.994	-0.36	1.89
FMO3	-11.56	12	-2.23	0.0129	134	0.909	0.987	17923	0.994	-0.206	1.89
CCDC151	-11.56	12	-2.23	0.013	135	0.909	0.987	17922	0.994	-0.165	1.89
NUFIP2	-11.55	12	-2.23	0.013	136	0.909	0.987	17921	0.994	-0.217	1.89
RFX1	-11.54	12	-2.22	0.0131	137	0.909	0.987	17920	0.994	-0.273	1.88
TOP1	-11.53	12	-2.22	0.0132	138	0.909	0.987	17919	0.994	-0.727	1.88
SEMA4A	-11.53	12	-2.22	0.0132	139	0.909	0.987	17918	0.994	-0.337	1.88
GPR12	-11.5	12	-2.22	0.0134	140	0.909	0.987	17917	0.994	-0.325	1.87
RAD1	-11.44	12	-2.21	0.0137	141	0.909	0.986	17916	0.994	-0.467	1.86
MTMR11	-11.44	12	-2.2	0.0137	142	0.909	0.986	17915	0.994	-0.33	1.86
FOXF2	-11.44	12	-2.2	0.0137	143	0.909	0.986	17914	0.994	-0.265	1.86
ATG10	-11.42	12	-2.2	0.0139	144	0.909	0.986	17913	0.994	-0.274	1.86
STXBP2	-11.39	12	-2.2	0.0141	145	0.909	0.986	17912	0.994	-0.169	1.85
SLC5A11	-11.39	12	-2.19	0.0141	146	0.909	0.986	17911	0.994	-0.298	1.85
DNAJC13	-11.36	12	-2.19	0.0143	147	0.909	0.986	17910	0.994	-0.334	1.84
ZNF662	-11.36	12	-2.19	0.0143	148	0.909	0.986	17909	0.994	-0.283	1.84
CEP120	-11.35	12	-2.19	0.0143	149	0.909	0.986	17908	0.994	-0.473	1.84
CCNF	-11.35	12	-2.19	0.0143	150	0.909	0.986	17907	0.994	-0.413	1.84
C1orf195	-11.35	12	-2.19	0.0143	151	0.909	0.986	17906	0.994	-0.383	1.84
OR52B2	-11.35	12	-2.19	0.0143	152	0.909	0.986	17905	0.994	-0.3	1.84
MAP3K2	-11.35	12	-2.19	0.0144	153	0.909	0.986	17904	0.994	-0.436	1.84
BRD9	-11.32	12	-2.18	0.0146	154	0.909	0.985	17903	0.994	-0.156	1.84
MROH2B	-11.3	12	-2.18	0.0147	155	0.909	0.985	17902	0.994	-0.264	1.83
THAP11	-11.3	12	-2.18	0.0147	156	0.909	0.985	17901	0.994	-0.44	1.83
ERBB2IP	-11.29	12	-2.18	0.0148	157	0.909	0.985	17900	0.994	-0.311	1.83
BHLHE22	-11.28	12	-2.17	0.0148	158	0.909	0.985	17899	0.994	-0.328	1.83
GDF11	-11.27	12	-2.17	0.0149	159	0.909	0.985	17898	0.994	-0.36	1.83
LCE4A	-9.75	9	-2.17	0.0149	160	0.909	0.985	17897	0.994	-0.447	1.83
HSD17B3	-11.24	12	-2.17	0.0151	161	0.909	0.985	17896	0.994	-0.287	1.82
TPX2	-11.14	12	-2.15	0.0158	162	0.909	0.984	17895	0.993	-0.518	1.8
RABGEF1	-11.13	12	-2.15	0.016	163	0.909	0.984	17894	0.993	-0.349	1.8
HFE2	-11.12	12	-2.14	0.016	164	0.909	0.984	17893	0.993	-0.317	1.8
RAD9A	-11.1	12	-2.14	0.0161	165	0.909	0.984	17892	0.993	-0.337	1.79
GNA12	-11.1	12	-2.14	0.0162	166	0.909	0.984	17891	0.993	-0.302	1.79
EPHB1	-11.02	12	-2.13	0.0168	167	0.909	0.983	17890	0.992	-0.049	1.77
SEC16B	-11.01	12	-2.12	0.0169	168	0.909	0.983	17889	0.992	-0.507	1.77
KDM2A	-11	12	-2.12	0.0169	169	0.909	0.983	17888	0.992	-0.424	1.77
INHBC	-10.99	12	-2.12	0.017	170	0.909	0.983	17887	0.992	-0.537	1.77
ZWINT	-10.91	12	-2.11	0.0176	171	0.909	0.982	17886	0.992	-0.415	1.75
EHMT2	-10.9	12	-2.1	0.0178	172	0.909	0.982	17885	0.992	-0.28	1.75
TLE3	-10.89	12	-2.1	0.0178	173	0.909	0.982	17884	0.992	-0.447	1.75
OR13G1	-10.89	12	-2.1	0.0179	174	0.909	0.982	17883	0.992	-0.226	1.75
BCL9L	-10.88	12	-2.1	0.0179	175	0.909	0.982	17882	0.992	-0.209	1.75
ACVR1B	-10.85	12	-2.09	0.0182	176	0.909	0.982	17881	0.991	-0.347	1.74
C6orf222	-10.84	12	-2.09	0.0183	177	0.909	0.982	17880	0.991	-0.368	1.74
IL17A	-10.83	12	-2.09	0.0184	178	0.909	0.982	17879	0.991	-0.501	1.74
EPHB2	-10.8	12	-2.08	0.0186	179	0.909	0.981	17878	0.991	-0.302	1.73
ME3	-10.79	12	-2.08	0.0187	180	0.909	0.981	17877	0.991	-0.394	1.73
SENP6	-10.79	12	-2.08	0.0187	181	0.909	0.981	17876	0.991	-0.702	1.73
RABIF	-10.76	12	-2.08	0.0189	182	0.909	0.981	17875	0.991	-0.392	1.72
GNA13	-10.76	12	-2.08	0.019	183	0.909	0.981	17874	0.991	-0.321	1.72
GDF10	-10.74	12	-2.07	0.0191	184	0.909	0.981	17873	0.991	-0.227	1.72
TMEM134	-10.73	12	-2.07	0.0192	185	0.909	0.981	17872	0.991	-0.263	1.72
CCR4	-10.7	12	-2.06	0.0195	186	0.909	0.981	17871	0.991	-0.207	1.71
CCDC70	-10.7	12	-2.06	0.0195	187	0.909	0.98	17870	0.991	-0.276	1.71
EWSR1	-10.69	12	-2.06	0.0196	188	0.909	0.98	17869	0.991	-0.387	1.71
RAB1B	-10.66	12	-2.06	0.0198	189	0.909	0.98	17868	0.99	-0.239	1.7
SIGLEC5	-10.64	12	-2.05	0.02	190	0.909	0.98	17867	0.99	-0.281	1.7
KRT222	-10.61	12	-2.05	0.0203	191	0.909	0.98	17866	0.99	-0.136	1.69
WBSCR27	-10.61	12	-2.05	0.0203	192	0.909	0.98	17865	0.99	-0.288	1.69
ITGB7	-10.6	12	-2.05	0.0204	193	0.909	0.98	17864	0.99	-0.054	1.69
ST18	-10.6	12	-2.05	0.0204	194	0.909	0.98	17863	0.99	-0.401	1.69
ORAI2	-10.58	12	-2.04	0.0205	195	0.909	0.979	17862	0.99	-0.227	1.69
H1FNT	-10.58	12	-2.04	0.0206	196	0.909	0.979	17861	0.99	-0.28	1.69
DAPK1	-10.56	12	-2.04	0.0207	197	0.909	0.979	17860	0.99	-0.401	1.68
KCNA4	-10.55	12	-2.04	0.0208	198	0.909	0.979	17859	0.99	-0.327	1.68
PFKP	-10.55	12	-2.04	0.0209	199	0.909	0.979	17858	0.99	-0.201	1.68
PDE4DIP	-10.54	12	-2.03	0.021	200	0.909	0.979	17857	0.99	-0.239	1.68
NFKB2	-10.53	12	-2.03	0.021	201	0.909	0.979	17856	0.99	-0.133	1.68
MFSD5	-10.53	12	-2.03	0.021	202	0.909	0.979	17855	0.99	-0.343	1.68
ZC3H11A	-10.52	12	-2.03	0.0211	203	0.909	0.979	17854	0.99	-0.189	1.68
ATG16L2	-10.5	12	-2.03	0.0213	204	0.909	0.979	17853	0.99	-0.174	1.67
RAB10	-10.49	12	-2.02	0.0214	205	0.909	0.979	17852	0.99	-0.312	1.67
ANKRD37	-10.49	12	-2.02	0.0215	206	0.909	0.979	17851	0.99	-0.31	1.67
HS2ST1	-10.48	12	-2.02	0.0215	207	0.909	0.978	17850	0.99	-0.333	1.67
MLXIP	-10.43	12	-2.01	0.022	208	0.909	0.978	17849	0.989	-0.209	1.66
LIX1L	-10.42	12	-2.01	0.0222	209	0.909	0.978	17848	0.989	-0.296	1.65
PDS5A	-10.41	12	-2.01	0.0222	210	0.909	0.978	17847	0.989	-0.443	1.65
ACYP2	-10.41	12	-2.01	0.0222	211	0.909	0.978	17846	0.989	-0.36	1.65
SPTY2D1	-10.41	12	-2.01	0.0223	212	0.909	0.978	17845	0.989	-0.389	1.65
SHROOM1	-10.39	12	-2.01	0.0224	213	0.909	0.978	17844	0.989	-0.308	1.65
TET1	-10.39	12	-2.01	0.0224	214	0.909	0.978	17843	0.989	-0.236	1.65
MUT	-10.39	12	-2.01	0.0224	215	0.909	0.978	17842	0.989	-0.27	1.65
CREB1	-10.38	12	-2	0.0226	216	0.909	0.977	17841	0.989	-0.348	1.65
VGLL4	-10.37	12	-2	0.0226	217	0.909	0.977	17840	0.989	-0.266	1.65
CRP	-10.37	12	-2	0.0226	218	0.909	0.977	17839	0.989	-0.276	1.65
TERF1	-10.36	12	-2	0.0227	219	0.909	0.977	17838	0.989	-0.348	1.64
NUP153	-10.35	12	-2	0.0228	220	0.909	0.977	17837	0.989	-0.402	1.64
C19orf44	-10.32	12	-1.99	0.0231	221	0.909	0.977	17836	0.989	-0.222	1.64
TC2N	-10.32	12	-1.99	0.0232	222	0.909	0.977	17835	0.989	-0.257	1.63
FURIN	-10.31	12	-1.99	0.0232	223	0.909	0.977	17834	0.989	-0.325	1.63
LPXN	-10.31	12	-1.99	0.0233	224	0.909	0.977	17833	0.989	-0.333	1.63
CERS5	-10.24	12	-1.98	0.024	225	0.909	0.976	17832	0.988	-0.321	1.62
VOPP1	-10.23	12	-1.97	0.0241	226	0.909	0.976	17831	0.988	-0.364	1.62
PTPN5	-10.22	12	-1.97	0.0242	227	0.909	0.976	17830	0.988	-0.219	1.62
DAB1	-10.2	12	-1.97	0.0244	228	0.909	0.976	17829	0.988	-0.071	1.61
CDC40	-10.2	12	-1.97	0.0244	229	0.909	0.976	17828	0.988	-0.691	1.61
KPRP	-10.2	12	-1.97	0.0245	230	0.909	0.976	17827	0.988	-0.315	1.61
OR5A2	-10.19	12	-1.97	0.0246	231	0.909	0.975	17826	0.988	-0.372	1.61
RTCA	-10.15	12	-1.96	0.025	232	0.909	0.975	17825	0.988	-0.317	1.6
HRASLS2	-10.15	12	-1.96	0.025	233	0.909	0.975	17824	0.988	-0.238	1.6
OBFC1	-10.14	12	-1.96	0.0251	234	0.909	0.975	17823	0.988	-0.359	1.6
PPM1J	-10.14	12	-1.96	0.0251	235	0.909	0.975	17822	0.988	-0.14	1.6
REG4	-10.13	12	-1.96	0.0252	236	0.909	0.975	17821	0.988	-0.545	1.6
CABIN1	-10.12	12	-1.95	0.0253	237	0.909	0.975	17820	0.988	-0.287	1.6
H3F3B	-7.16	6	-1.95	0.0253	238	0.909	0.975	17819	0.988	-0.279	1.6
BRAP	-10.08	12	-1.95	0.0258	239	0.909	0.974	17818	0.987	-0.362	1.59
NOS1AP	-10.07	12	-1.94	0.0259	240	0.909	0.974	17817	0.987	-0.181	1.59
HIST3H2BB	-10.07	12	-1.94	0.0259	241	0.909	0.974	17816	0.987	-0.229	1.59
MAMSTR	-10.05	12	-1.94	0.0261	242	0.909	0.974	17815	0.987	-0.456	1.58
MPZ	-10.04	12	-1.94	0.0262	243	0.909	0.974	17814	0.987	-0.213	1.58
SHC1	-10.02	12	-1.94	0.0265	244	0.909	0.974	17813	0.987	-0.211	1.58
NFKBIL1	-10.01	12	-1.93	0.0265	245	0.909	0.973	17812	0.987	-0.329	1.58
KRT79	-9.99	12	-1.93	0.0268	246	0.909	0.973	17811	0.987	-0.172	1.57
HEPACAM	-9.97	12	-1.93	0.027	247	0.909	0.973	17810	0.986	-0.235	1.57
ZFP30	-9.96	12	-1.92	0.0271	248	0.909	0.973	17809	0.986	-0.4	1.57
CELA1	-9.95	12	-1.92	0.0272	249	0.909	0.973	17808	0.986	-0.314	1.57
KRTAP1-1	-4.97	3	-1.92	0.0273	250	0.909	0.973	17807	0.986	-0.646	1.56
PIPOX	-9.94	12	-1.92	0.0273	251	0.909	0.973	17806	0.986	-0.488	1.56
FKBP1C	-8.61	9	-1.92	0.0274	252	0.909	0.973	17805	0.986	-0.322	1.56
PRAMEF8	-9.92	12	-1.92	0.0276	253	0.909	0.972	17804	0.986	-0.335	1.56
CLEC2A	-9.9	12	-1.91	0.0278	254	0.909	0.972	17803	0.986	-0.272	1.56
TMEM100	-9.9	12	-1.91	0.0279	255	0.909	0.972	17802	0.986	-0.22	1.55
FCGR1A	-9.89	12	-1.91	0.028	256	0.909	0.972	17801	0.986	-0.362	1.55
LST1	-9.89	12	-1.91	0.028	257	0.909	0.972	17800	0.986	-0.356	1.55
KDM5B	-9.87	12	-1.91	0.0283	258	0.909	0.972	17799	0.986	-0.344	1.55
LAMA1	-9.86	12	-1.91	0.0283	259	0.909	0.972	17798	0.986	-0.186	1.55
EPC1	-9.86	12	-1.91	0.0283	260	0.909	0.972	17797	0.986	-0.411	1.55
GNAI2	-9.86	12	-1.9	0.0284	261	0.909	0.972	17796	0.986	-0.397	1.55
SLC35C1	-9.85	12	-1.9	0.0285	262	0.909	0.972	17795	0.986	-0.102	1.55
LPP	-9.85	12	-1.9	0.0285	263	0.909	0.972	17794	0.986	-0.288	1.55
LRRC8B	-9.83	12	-1.9	0.0287	264	0.909	0.971	17793	0.986	-0.143	1.54
TBC1D10C	-9.82	12	-1.9	0.0289	265	0.909	0.971	17792	0.986	-0.273	1.54
SCRT2	-9.81	12	-1.9	0.029	266	0.909	0.971	17791	0.985	-0.144	1.54
CCS	-9.79	12	-1.89	0.0293	267	0.909	0.971	17790	0.985	-0.256	1.53
ENTPD6	-9.78	12	-1.89	0.0294	268	0.909	0.971	17789	0.985	-0.408	1.53
KIF13A	-9.77	12	-1.89	0.0294	269	0.909	0.971	17788	0.985	-0.275	1.53
UPK1A	-9.76	12	-1.89	0.0296	270	0.909	0.97	17787	0.985	-0.276	1.53
ATP1A4	-9.75	12	-1.89	0.0297	271	0.909	0.97	17786	0.985	-0.402	1.53
IL6R	-9.74	12	-1.88	0.0298	272	0.909	0.97	17785	0.985	-0.194	1.53
PVRL3	-9.74	12	-1.88	0.0298	273	0.909	0.97	17784	0.985	-0.214	1.53
RAB3IL1	-9.73	12	-1.88	0.03	274	0.909	0.97	17783	0.985	-0.335	1.52
GLIS1	-9.73	12	-1.88	0.03	275	0.909	0.97	17782	0.985	-0.228	1.52
TFPT	-9.73	12	-1.88	0.0301	276	0.909	0.97	17781	0.985	-0.297	1.52
AP1M1	-9.72	12	-1.88	0.0301	277	0.909	0.97	17780	0.985	-0.338	1.52
NKX1-2	-9.7	12	-1.88	0.0304	278	0.909	0.97	17779	0.985	-0.289	1.52
CHI3L2	-9.69	12	-1.87	0.0305	279	0.909	0.969	17778	0.985	-0.265	1.52
KIAA1324	-9.68	12	-1.87	0.0306	280	0.909	0.969	17777	0.985	-0.193	1.51
COX7A1	-9.68	12	-1.87	0.0306	281	0.909	0.969	17776	0.985	-0.163	1.51
UGCG	-9.67	12	-1.87	0.0308	282	0.909	0.969	17775	0.984	-0.409	1.51
ACCSL	-9.66	12	-1.87	0.0309	283	0.909	0.969	17774	0.984	-0.311	1.51
TMEM117	-9.66	12	-1.87	0.031	284	0.909	0.969	17773	0.984	-0.38	1.51
ANKLE2	-9.65	12	-1.87	0.031	285	0.909	0.969	17772	0.984	0.83	1.51
MAGEB5	-9.65	12	-1.87	0.0311	286	0.909	0.969	17771	0.984	-0.178	1.51
FAM221A	-9.64	12	-1.86	0.0312	287	0.909	0.969	17770	0.984	-0.426	1.51
DHX8	-9.64	12	-1.86	0.0312	288	0.909	0.969	17769	0.984	-0.313	1.51
LCMT1	-9.63	12	-1.86	0.0313	289	0.909	0.969	17768	0.984	-0.318	1.5
LPIN3	-9.61	12	-1.86	0.0316	290	0.909	0.968	17767	0.984	-0.086	1.5
VAMP3	-9.6	12	-1.86	0.0318	291	0.909	0.968	17766	0.984	-0.239	1.5
SPTBN5	-9.59	12	-1.85	0.0318	292	0.909	0.968	17765	0.984	-0.153	1.5
PAPPA2	-9.59	12	-1.85	0.0319	293	0.909	0.968	17764	0.984	-0.179	1.5
SPI1	-9.59	12	-1.85	0.0319	294	0.909	0.968	17763	0.984	-0.222	1.5
UBAP1	-9.59	12	-1.85	0.0319	295	0.909	0.968	17762	0.984	-0.224	1.5
PPP1R1A	-9.58	12	-1.85	0.032	296	0.909	0.968	17761	0.984	-0.245	1.49
IL20RB	-9.57	12	-1.85	0.0321	297	0.909	0.968	17760	0.984	-0.279	1.49
KRT85	-9.57	12	-1.85	0.0321	298	0.909	0.968	17759	0.984	-0.208	1.49
BCL2L15	-9.55	12	-1.85	0.0324	299	0.909	0.968	17758	0.984	-0.276	1.49
GATAD1	-9.55	12	-1.85	0.0324	300	0.909	0.968	17757	0.984	-0.21	1.49
KAT5	-9.54	12	-1.85	0.0325	301	0.909	0.968	17756	0.984	-0.283	1.49
NRSN1	-9.54	12	-1.84	0.0326	302	0.909	0.967	17755	0.984	-0.276	1.49
ABRACL	-9.53	12	-1.84	0.0327	303	0.909	0.967	17754	0.984	-0.278	1.49
KIF5A	-9.52	12	-1.84	0.0328	304	0.909	0.967	17753	0.984	-0.229	1.48
FAM212B	-9.52	12	-1.84	0.0328	305	0.909	0.967	17752	0.984	-0.351	1.48
GLTP	-9.52	12	-1.84	0.0328	306	0.909	0.967	17751	0.984	-0.333	1.48
TMEM38A	-9.51	12	-1.84	0.0329	307	0.909	0.967	17750	0.984	-0.261	1.48
SMR3B	-9.49	12	-1.84	0.0332	308	0.909	0.967	17749	0.984	-0.296	1.48
MFSD3	-9.49	12	-1.84	0.0332	309	0.909	0.967	17748	0.984	-0.32	1.48
OVOL2	-9.49	12	-1.83	0.0333	310	0.909	0.967	17747	0.984	-0.336	1.48
GJA3	-9.48	12	-1.83	0.0334	311	0.909	0.967	17746	0.983	-0.281	1.48
KRT27	-9.48	12	-1.83	0.0334	312	0.909	0.967	17745	0.983	-0.198	1.48
TMEM53	-9.47	12	-1.83	0.0336	313	0.909	0.966	17744	0.983	-0.172	1.47
C9orf43	-9.45	12	-1.83	0.0337	314	0.909	0.966	17743	0.983	-0.352	1.47
KPNA3	-9.45	12	-1.83	0.0338	315	0.909	0.966	17742	0.983	-0.247	1.47
GOLGA8R	-6.68	6	-1.83	0.0339	316	0.909	0.966	17741	0.983	-0.469	1.47
ASTL	-9.44	12	-1.83	0.0339	317	0.909	0.966	17740	0.983	-0.264	1.47
COL7A1	-9.43	12	-1.82	0.034	318	0.909	0.966	17739	0.983	-0.308	1.47
HIST1H3G	-4.72	3	-1.82	0.0341	319	0.909	0.966	17738	0.983	-0.646	1.47
CATSPER1	-9.43	12	-1.82	0.0341	320	0.909	0.966	17737	0.983	-0.23	1.47
ANKRD45	-9.42	12	-1.82	0.0342	321	0.909	0.966	17736	0.983	-0.289	1.47
KIAA0319	-9.42	12	-1.82	0.0343	322	0.909	0.966	17735	0.983	-0.317	1.46
RAB11FIP4	-9.42	12	-1.82	0.0343	323	0.909	0.966	17734	0.983	-0.204	1.46
NKAIN1	-9.41	12	-1.82	0.0343	324	0.909	0.966	17733	0.983	-0.329	1.46
NUSAP1	-9.41	12	-1.82	0.0344	325	0.909	0.966	17732	0.983	-0.315	1.46
TMCO5A	-9.41	12	-1.82	0.0344	326	0.909	0.966	17731	0.983	-0.354	1.46
NPR1	-9.39	12	-1.82	0.0346	327	0.909	0.965	17730	0.983	-0.325	1.46
DEFB108B	-4.69	3	-1.81	0.0348	328	0.909	0.965	17729	0.983	-0.48	1.46
INTS2	-9.38	12	-1.81	0.0348	329	0.909	0.965	17728	0.983	-0.583	1.46
C10orf12	-9.37	12	-1.81	0.035	330	0.909	0.965	17727	0.983	-0.263	1.46
HAO2	-9.36	12	-1.81	0.0351	331	0.909	0.965	17726	0.983	-0.242	1.45
ZFP57	-9.36	12	-1.81	0.0351	332	0.909	0.965	17725	0.983	-0.124	1.45
GNG3	-9.35	12	-1.81	0.0352	333	0.909	0.965	17724	0.983	-0.342	1.45
GZMA	-9.34	12	-1.81	0.0353	334	0.909	0.965	17723	0.983	-0.177	1.45
IL10RA	-9.34	12	-1.81	0.0353	335	0.909	0.965	17722	0.983	-0.233	1.45
YEATS4	-9.32	12	-1.8	0.0356	336	0.909	0.964	17721	0.983	-0.525	1.45
PNMAL2	-9.32	12	-1.8	0.0357	337	0.909	0.964	17720	0.983	-0.158	1.45
ATXN7L3	-9.31	12	-1.8	0.0358	338	0.909	0.964	17719	0.983	-0.115	1.45
OR4N4	-9.31	12	-1.8	0.0359	339	0.909	0.964	17718	0.983	-0.21	1.44
ANGPTL6	-9.3	12	-1.8	0.0359	340	0.909	0.964	17717	0.983	-0.254	1.44
DEPDC4	-9.28	12	-1.79	0.0363	341	0.909	0.964	17716	0.982	-0.31	1.44
UBE2L6	-9.27	12	-1.79	0.0364	342	0.909	0.964	17715	0.982	-0.242	1.44
THBS3	-9.27	12	-1.79	0.0365	343	0.909	0.964	17714	0.982	-0.161	1.44
CBX5	-9.26	12	-1.79	0.0365	344	0.909	0.963	17713	0.982	-0.371	1.44
HLA-DOA	-9.26	12	-1.79	0.0366	345	0.909	0.963	17712	0.982	-0.269	1.44
CEBPA	-9.26	12	-1.79	0.0366	346	0.909	0.963	17711	0.982	-0.229	1.44
DUOX2	-9.26	12	-1.79	0.0366	347	0.909	0.963	17710	0.982	-0.224	1.44
TSC22D2	-9.25	12	-1.79	0.0367	348	0.909	0.963	17709	0.982	-0.132	1.44
TREM1	-9.24	12	-1.79	0.0369	349	0.909	0.963	17708	0.982	-0.189	1.43
LINGO4	-9.23	12	-1.79	0.037	350	0.909	0.963	17707	0.982	-0.355	1.43
DAB2IP	-9.22	12	-1.78	0.0371	351	0.909	0.963	17706	0.982	-0.236	1.43
EPN1	-9.21	12	-1.78	0.0373	352	0.909	0.963	17705	0.982	-0.276	1.43
NXPE4	-9.21	12	-1.78	0.0374	353	0.909	0.963	17704	0.982	-0.208	1.43
NOX5	-9.2	12	-1.78	0.0375	354	0.909	0.962	17703	0.982	-0.286	1.43
PHLPP2	-9.2	12	-1.78	0.0375	355	0.909	0.962	17702	0.982	-0.146	1.43
KPTN	-9.19	12	-1.78	0.0377	356	0.909	0.962	17701	0.982	-0.262	1.42
SLC26A10	-9.18	12	-1.78	0.0379	357	0.909	0.962	17700	0.981	-0.243	1.42
OR7C1	-9.17	12	-1.77	0.038	358	0.909	0.962	17699	0.981	-0.283	1.42
SAP30	-9.17	12	-1.77	0.038	359	0.909	0.962	17698	0.981	-0.271	1.42
NUP155	-9.17	12	-1.77	0.038	360	0.909	0.962	17697	0.981	-0.882	1.42
CXCR3	-9.17	12	-1.77	0.038	361	0.909	0.962	17696	0.981	-0.213	1.42
SLC17A2	-9.16	12	-1.77	0.0382	362	0.909	0.962	17695	0.981	-0.439	1.42
RBM5	-9.15	12	-1.77	0.0383	363	0.909	0.962	17694	0.981	-0.212	1.42
CD6	-9.14	12	-1.77	0.0384	364	0.909	0.962	17693	0.981	-0.14	1.42
IGHMBP2	-9.14	12	-1.77	0.0384	365	0.909	0.962	17692	0.981	-0.238	1.42
GAK	-9.14	12	-1.77	0.0384	366	0.909	0.962	17691	0.981	-0.328	1.42
GPATCH1	-9.13	12	-1.77	0.0385	367	0.909	0.961	17690	0.981	-0.417	1.41
ABCA13	-9.13	12	-1.77	0.0386	368	0.909	0.961	17689	0.981	-0.207	1.41
ZNF281	-9.12	12	-1.77	0.0387	369	0.909	0.961	17688	0.981	-0.294	1.41
ACP6	-9.11	12	-1.76	0.0389	370	0.909	0.961	17687	0.981	-0.208	1.41
VWA5B1	-9.11	12	-1.76	0.039	371	0.909	0.961	17686	0.981	-0.183	1.41
VPS13C	-9.1	12	-1.76	0.0392	372	0.909	0.961	17685	0.981	-0.281	1.41
OTP	-9.08	12	-1.76	0.0394	373	0.909	0.961	17684	0.981	-0.225	1.4
CMIP	-9.07	12	-1.76	0.0395	374	0.909	0.96	17683	0.981	-0.263	1.4
SLC44A5	-9.07	12	-1.75	0.0396	375	0.909	0.96	17682	0.981	-0.119	1.4
PLA2G4D	-9.06	12	-1.75	0.0398	376	0.909	0.96	17681	0.981	-0.302	1.4
ZNF121	-9.06	12	-1.75	0.0398	377	0.909	0.96	17680	0.981	-0.295	1.4
TULP1	-9.05	12	-1.75	0.0398	378	0.909	0.96	17679	0.981	-0.365	1.4
GSK3A	-9.05	12	-1.75	0.0399	379	0.909	0.96	17678	0.981	-0.161	1.4
CASP14	-9.04	12	-1.75	0.04	380	0.909	0.96	17677	0.981	-0.293	1.4
WDR48	-9.04	12	-1.75	0.0401	381	0.909	0.96	17676	0.981	-0.342	1.4
RSU1	-9.03	12	-1.75	0.0402	382	0.909	0.96	17675	0.981	-0.369	1.4
PPP1R18	-9.03	12	-1.75	0.0402	383	0.909	0.96	17674	0.981	-0.202	1.4
ROM1	-9.02	12	-1.75	0.0403	384	0.909	0.96	17673	0.98	-0.471	1.39
AMT	-9.01	12	-1.75	0.0405	385	0.909	0.96	17672	0.98	-0.208	1.39
TMEM225	-8.98	12	-1.74	0.0411	386	0.909	0.959	17671	0.98	-0.285	1.39
SGCE	-8.97	12	-1.74	0.0412	387	0.909	0.959	17670	0.98	-0.024	1.39
RNF31	-8.96	12	-1.74	0.0413	388	0.909	0.959	17669	0.98	-0.226	1.38
HLX	-8.96	12	-1.73	0.0414	389	0.909	0.959	17668	0.98	-0.414	1.38
ELSPBP1	-8.95	12	-1.73	0.0416	390	0.909	0.958	17667	0.98	-0.372	1.38
EFR3A	-8.93	12	-1.73	0.0419	391	0.909	0.958	17666	0.979	-0.274	1.38
KLF2	-8.92	12	-1.73	0.042	392	0.909	0.958	17665	0.979	-0.196	1.38
IL25	-8.92	12	-1.73	0.042	393	0.909	0.958	17664	0.979	-0.188	1.38
LRRC38	-8.92	12	-1.73	0.042	394	0.909	0.958	17663	0.979	-0.324	1.38
GPR98	-8.89	12	-1.72	0.0425	395	0.909	0.957	17662	0.979	-0.203	1.37
ELAVL1	-8.88	12	-1.72	0.0427	396	0.909	0.957	17661	0.979	-0.159	1.37
YIPF1	-8.87	12	-1.72	0.0429	397	0.909	0.957	17660	0.979	-0.273	1.37
KCNC4	-8.86	12	-1.72	0.0431	398	0.909	0.957	17659	0.978	-0.2	1.37
SQRDL	-8.85	12	-1.71	0.0432	399	0.909	0.957	17658	0.978	-0.262	1.36
SENP7	-8.84	12	-1.71	0.0434	400	0.909	0.957	17657	0.978	-0.199	1.36
CRCT1	-8.84	12	-1.71	0.0434	401	0.909	0.957	17656	0.978	-0.013	1.36
VAV2	-8.84	12	-1.71	0.0434	402	0.909	0.957	17655	0.978	-0.18	1.36
NUP160	-8.84	12	-1.71	0.0435	403	0.909	0.957	17654	0.978	-0.067	1.36
G3BP2	-8.84	12	-1.71	0.0435	404	0.909	0.957	17653	0.978	-0.23	1.36
HELZ2	-8.84	12	-1.71	0.0435	405	0.909	0.956	17652	0.978	-0.252	1.36
SLC15A1	-8.83	12	-1.71	0.0435	406	0.909	0.956	17651	0.978	-0.358	1.36
ZNF148	-8.83	12	-1.71	0.0436	407	0.909	0.956	17650	0.978	-0.184	1.36
LACRT	-8.82	12	-1.71	0.0438	408	0.909	0.956	17649	0.978	-0.076	1.36
MAFB	-8.82	12	-1.71	0.0438	409	0.909	0.956	17648	0.978	-0.1	1.36
NAP1L1	-8.81	12	-1.71	0.044	410	0.909	0.956	17647	0.978	-0.257	1.36
OSBP	-8.81	12	-1.71	0.044	411	0.909	0.956	17646	0.978	-0.34	1.36
SCAF1	-8.81	12	-1.71	0.044	412	0.909	0.956	17645	0.978	-0.47	1.36
IWS1	-8.8	12	-1.71	0.0441	413	0.909	0.956	17644	0.978	-0.357	1.36
AFF4	-8.8	12	-1.7	0.0441	414	0.909	0.956	17643	0.978	-0.342	1.36
TMEM132A	-8.8	12	-1.7	0.0442	415	0.909	0.956	17642	0.978	-0.059	1.35
TXNDC5	-8.78	12	-1.7	0.0445	416	0.909	0.955	17641	0.978	-0.105	1.35
USF1	-8.78	12	-1.7	0.0445	417	0.909	0.955	17640	0.978	-0.115	1.35
C5orf27	-8.77	12	-1.7	0.0446	418	0.909	0.955	17639	0.978	-0.2	1.35
CLDN3	-8.77	12	-1.7	0.0447	419	0.909	0.955	17638	0.978	-0.108	1.35
TAL1	-8.77	12	-1.7	0.0447	420	0.909	0.955	17637	0.978	-0.294	1.35
ZFP90	-8.76	12	-1.7	0.0449	421	0.909	0.955	17636	0.978	-0.332	1.35
METTL11B	-8.76	12	-1.7	0.0449	422	0.909	0.955	17635	0.978	-0.135	1.35
WNT3A	-8.75	12	-1.7	0.045	423	0.909	0.955	17634	0.978	-0.142	1.35
PPAP2A	-8.75	12	-1.7	0.045	424	0.909	0.955	17633	0.978	-0.23	1.35
OR6F1	-8.75	12	-1.69	0.045	425	0.909	0.955	17632	0.978	-0.191	1.35
WIZ	-8.74	12	-1.69	0.0453	426	0.909	0.955	17631	0.978	-0.183	1.34
ESRRA	-8.73	12	-1.69	0.0453	427	0.909	0.955	17630	0.978	-0.174	1.34
KRT73	-8.73	12	-1.69	0.0454	428	0.909	0.955	17629	0.978	-0.203	1.34
MAGED1	-8.72	12	-1.69	0.0455	429	0.909	0.954	17628	0.978	-0.292	1.34
SHARPIN	-8.72	12	-1.69	0.0456	430	0.909	0.954	17627	0.978	-0.24	1.34
CHRM1	-8.72	12	-1.69	0.0456	431	0.909	0.954	17626	0.978	-0.131	1.34
SMTNL1	-8.71	12	-1.69	0.0458	432	0.909	0.954	17625	0.977	-0.281	1.34
LRRC40	-8.7	12	-1.69	0.0459	433	0.909	0.954	17624	0.977	-0.006	1.34
CCL17	-8.7	12	-1.69	0.046	434	0.909	0.954	17623	0.977	-0.224	1.34
CLCC1	-8.69	12	-1.68	0.0461	435	0.909	0.954	17622	0.977	-0.244	1.34
ARPC1B	-8.69	12	-1.68	0.0462	436	0.909	0.954	17621	0.977	-0.493	1.34
CTC-534A2.2	-8.68	12	-1.68	0.0462	437	0.909	0.954	17620	0.977	-0.264	1.34
BAZ1B	-8.68	12	-1.68	0.0462	438	0.909	0.954	17619	0.977	-0.142	1.34
RBPJ	-8.67	12	-1.68	0.0464	439	0.909	0.954	17618	0.977	-0.284	1.33
ARHGAP23	-8.67	12	-1.68	0.0464	440	0.909	0.954	17617	0.977	-0.27	1.33
PLEKHG2	-8.67	12	-1.68	0.0465	441	0.909	0.954	17616	0.977	-0.258	1.33
FBXL2	-8.66	12	-1.68	0.0466	442	0.909	0.953	17615	0.977	-0.302	1.33
CDRT1	-7.5	9	-1.68	0.0467	443	0.909	0.953	17614	0.977	-0.231	1.33
SAMD9L	-8.66	12	-1.68	0.0467	444	0.909	0.953	17613	0.977	-0.312	1.33
ZNF830	-8.65	12	-1.68	0.0468	445	0.909	0.953	17612	0.977	-0.295	1.33
BAZ2A	-8.65	12	-1.68	0.0469	446	0.909	0.953	17611	0.977	-0.152	1.33
RELL1	-8.64	12	-1.67	0.0471	447	0.909	0.953	17610	0.977	-0.258	1.33
GCM1	-8.62	12	-1.67	0.0473	448	0.909	0.953	17609	0.977	-0.402	1.33
SH3BP2	-8.62	12	-1.67	0.0474	449	0.909	0.953	17608	0.977	-0.19	1.32
TRIM67	-8.62	12	-1.67	0.0475	450	0.909	0.953	17607	0.977	-0.191	1.32
LGR5	-8.62	12	-1.67	0.0475	451	0.909	0.953	17606	0.977	-0.149	1.32
HYKK	-8.62	12	-1.67	0.0475	452	0.909	0.953	17605	0.977	-0.239	1.32
LURAP1	-8.62	12	-1.67	0.0475	453	0.909	0.952	17604	0.977	-0.162	1.32
DMXL2	-8.61	12	-1.67	0.0477	454	0.909	0.952	17603	0.977	-0.114	1.32
PLEKHA6	-8.6	12	-1.67	0.0477	455	0.909	0.952	17602	0.977	-0.285	1.32
OR12D3	-8.6	12	-1.67	0.0478	456	0.909	0.952	17601	0.977	-0.23	1.32
MAPK11	-8.58	12	-1.66	0.0481	457	0.909	0.952	17600	0.977	-0.261	1.32
SP8	-8.58	12	-1.66	0.0482	458	0.909	0.952	17599	0.977	-0.16	1.32
OSCP1	-8.57	12	-1.66	0.0483	459	0.909	0.952	17598	0.976	-0.245	1.32
C7orf71	-8.57	12	-1.66	0.0484	460	0.909	0.952	17597	0.976	-0.338	1.32
FGF14	-8.57	12	-1.66	0.0484	461	0.909	0.952	17596	0.976	0.083	1.32
MYO1F	-8.57	12	-1.66	0.0484	462	0.909	0.952	17595	0.976	-0.19	1.32
FAM71F2	-8.56	12	-1.66	0.0486	463	0.909	0.951	17594	0.976	-0.279	1.31
NFE2	-8.56	12	-1.66	0.0487	464	0.909	0.951	17593	0.976	-0.233	1.31
SLC9A7	-8.55	12	-1.66	0.0487	465	0.909	0.951	17592	0.976	-0.569	1.31
TGM4	-8.55	12	-1.66	0.0488	466	0.909	0.951	17591	0.976	-0.341	1.31
SEC23B	-8.54	12	-1.66	0.0489	467	0.909	0.951	17590	0.976	-0.154	1.31
CCDC65	-8.54	12	-1.65	0.049	468	0.909	0.951	17589	0.976	-0.248	1.31
NOTCH3	-8.54	12	-1.65	0.049	469	0.909	0.951	17588	0.976	-0.082	1.31
TM7SF3	-8.54	12	-1.65	0.049	470	0.909	0.951	17587	0.976	-0.212	1.31
RCN2	-8.54	12	-1.65	0.049	471	0.909	0.951	17586	0.976	-0.209	1.31
CLPSL2	-8.53	12	-1.65	0.0491	472	0.909	0.951	17585	0.976	-0.161	1.31
INSL5	-8.53	12	-1.65	0.0491	473	0.909	0.951	17584	0.976	-0.232	1.31
RNASE1	-8.53	12	-1.65	0.0492	474	0.909	0.951	17583	0.976	-0.291	1.31
GJA10	-8.52	12	-1.65	0.0493	475	0.909	0.951	17582	0.976	-0.094	1.31
C1orf210	-8.52	12	-1.65	0.0493	476	0.909	0.951	17581	0.976	-0.305	1.31
ZNF282	-8.52	12	-1.65	0.0494	477	0.909	0.951	17580	0.976	-0.297	1.31
AIF1	-8.51	12	-1.65	0.0494	478	0.909	0.951	17579	0.976	-0.338	1.31
DYRK2	-8.51	12	-1.65	0.0494	479	0.909	0.951	17578	0.976	-0.133	1.31
SLC22A11	-8.51	12	-1.65	0.0496	480	0.909	0.95	17577	0.976	-0.279	1.3
FAM71F1	-8.51	12	-1.65	0.0496	481	0.909	0.95	17576	0.976	-0.223	1.3
RETNLB	-8.5	12	-1.65	0.0498	482	0.909	0.95	17575	0.976	-0.086	1.3
GDPGP1	-8.49	12	-1.65	0.0498	483	0.909	0.95	17574	0.976	-0.143	1.3
RASGRF1	-8.49	12	-1.65	0.0499	484	0.909	0.95	17573	0.976	-0.236	1.3
TEX26	-8.49	12	-1.65	0.05	485	0.909	0.95	17572	0.976	-0.292	1.3
AP4E1	-8.48	12	-1.64	0.0501	486	0.909	0.95	17571	0.976	-0.249	1.3
CALCA	-8.48	12	-1.64	0.0501	487	0.909	0.95	17570	0.976	-0.078	1.3
TRIM21	-8.48	12	-1.64	0.0501	488	0.909	0.95	17569	0.976	-0.181	1.3
RBM24	-8.47	12	-1.64	0.0503	489	0.909	0.95	17568	0.976	-0.237	1.3
NDUFB9	-8.46	12	-1.64	0.0504	490	0.909	0.95	17567	0.976	-0.293	1.3
KIAA0226L	-8.46	12	-1.64	0.0505	491	0.909	0.95	17566	0.976	-0.078	1.3
DUOXA1	-8.46	12	-1.64	0.0505	492	0.909	0.95	17565	0.976	-0.236	1.3
MPST	-8.45	12	-1.64	0.0506	493	0.909	0.949	17564	0.976	-0.171	1.3
HDGFRP2	-8.44	12	-1.64	0.0508	494	0.909	0.949	17563	0.976	-0.198	1.29
TUBGCP2	-8.44	12	-1.64	0.0508	495	0.909	0.949	17562	0.976	-0.294	1.29
SRPK2	-8.44	12	-1.64	0.051	496	0.909	0.949	17561	0.976	-0.139	1.29
C1orf146	-5.96	6	-1.64	0.051	497	0.909	0.949	17560	0.976	-0.334	1.29
ZBTB3	-8.43	12	-1.63	0.0511	498	0.909	0.949	17559	0.976	-0.056	1.29
RCAN3	-8.42	12	-1.63	0.0512	499	0.909	0.949	17558	0.976	-0.302	1.29
SIKE1	-8.42	12	-1.63	0.0513	500	0.909	0.949	17557	0.976	-0.293	1.29
CNR2	-8.42	12	-1.63	0.0514	501	0.909	0.949	17556	0.976	-0.214	1.29
OC90	-8.41	12	-1.63	0.0514	502	0.909	0.949	17555	0.976	-0.239	1.29
HIST1H1T	-8.41	12	-1.63	0.0514	503	0.909	0.949	17554	0.976	-0.218	1.29
CPD	-8.41	12	-1.63	0.0515	504	0.909	0.949	17553	0.976	-0.371	1.29
DRD5	-8.41	12	-1.63	0.0515	505	0.909	0.949	17552	0.976	-0.391	1.29
ST8SIA2	-8.41	12	-1.63	0.0515	506	0.909	0.948	17551	0.976	-0.467	1.29
ODF1	-8.41	12	-1.63	0.0516	507	0.909	0.948	17550	0.976	-0.327	1.29
FEZF1	-8.4	12	-1.63	0.0516	508	0.909	0.948	17549	0.976	-0.25	1.29
NCK1	-8.4	12	-1.63	0.0516	509	0.909	0.948	17548	0.976	-0.389	1.29
SLC35E2B	-8.4	12	-1.63	0.0517	510	0.909	0.948	17547	0.976	-0.366	1.29
GNRH2	-8.39	12	-1.63	0.0518	511	0.909	0.948	17546	0.976	-0.198	1.29
ZBED5	-8.39	12	-1.63	0.0518	512	0.909	0.948	17545	0.976	-0.15	1.29
OR4D6	-8.39	12	-1.63	0.0519	513	0.909	0.948	17544	0.976	-0.25	1.28
SLC17A3	-8.39	12	-1.63	0.0519	514	0.909	0.948	17543	0.976	-0.289	1.28
CXCL5	-8.38	12	-1.63	0.052	515	0.909	0.948	17542	0.976	-0.224	1.28
RAB2A	-8.38	12	-1.63	0.052	516	0.909	0.948	17541	0.976	-0.225	1.28
EBP	-8.38	12	-1.62	0.0522	517	0.909	0.948	17540	0.976	-0.302	1.28
LRTM1	-8.38	12	-1.62	0.0522	518	0.909	0.948	17539	0.976	-0.234	1.28
NUCKS1	-8.37	12	-1.62	0.0522	519	0.909	0.948	17538	0.976	-0.407	1.28
CHRM4	-8.35	12	-1.62	0.0527	520	0.909	0.947	17537	0.975	-0.175	1.28
IL18RAP	-8.35	12	-1.62	0.0527	521	0.909	0.947	17536	0.975	-0.171	1.28
FYTTD1	-8.34	12	-1.62	0.0529	522	0.909	0.947	17535	0.975	-0.02	1.28
OR4C5	-8.34	12	-1.62	0.0529	523	0.909	0.947	17534	0.975	-0.184	1.28
ZBTB10	-8.34	12	-1.62	0.0529	524	0.909	0.947	17533	0.975	-0.377	1.28
TTC23L	-8.34	12	-1.62	0.0529	525	0.909	0.947	17532	0.975	-0.133	1.28
ZCCHC14	-8.33	12	-1.62	0.0531	526	0.909	0.947	17531	0.975	-0.221	1.27
OR2B11	-8.33	12	-1.61	0.0532	527	0.909	0.947	17530	0.975	-0.114	1.27
BCAS3	-8.33	12	-1.61	0.0532	528	0.909	0.947	17529	0.975	-0.278	1.27
NTF4	-8.32	12	-1.61	0.0532	529	0.909	0.947	17528	0.975	-0.152	1.27
SPERT	-8.32	12	-1.61	0.0533	530	0.909	0.947	17527	0.975	-0.243	1.27
KPNA4	-8.32	12	-1.61	0.0533	531	0.909	0.947	17526	0.975	-0.223	1.27
TEX261	-8.31	12	-1.61	0.0534	532	0.909	0.947	17525	0.975	-0.011	1.27
ZC3H12A	-8.31	12	-1.61	0.0534	533	0.909	0.947	17524	0.975	-0.351	1.27
FRS3	-8.31	12	-1.61	0.0534	534	0.909	0.947	17523	0.975	-0.296	1.27
AQP6	-8.31	12	-1.61	0.0536	535	0.909	0.946	17522	0.975	-0.173	1.27
COCH	-8.31	12	-1.61	0.0536	536	0.909	0.946	17521	0.975	-0.368	1.27
PLIN1	-8.31	12	-1.61	0.0536	537	0.909	0.946	17520	0.975	-0.24	1.27
FGF3	-8.3	12	-1.61	0.0537	538	0.909	0.946	17519	0.975	-0.251	1.27
ACP2	-8.3	12	-1.61	0.0537	539	0.909	0.946	17518	0.975	-0.145	1.27
GNAI3	-8.29	12	-1.61	0.0539	540	0.909	0.946	17517	0.975	-0.113	1.27
CD79B	-8.28	12	-1.61	0.0541	541	0.909	0.946	17516	0.975	-0.118	1.27
ERBB2	-8.28	12	-1.61	0.0541	542	0.909	0.946	17515	0.975	-0.105	1.27
SNX13	-8.28	12	-1.61	0.0542	543	0.909	0.946	17514	0.975	-0.284	1.27
AK5	-8.28	12	-1.61	0.0542	544	0.909	0.946	17513	0.975	-0.241	1.27
TIMM17A	-8.27	12	-1.6	0.0544	545	0.909	0.946	17512	0.975	-0.363	1.26
ARGLU1	-8.26	12	-1.6	0.0545	546	0.909	0.945	17511	0.975	-0.269	1.26
WWTR1	-8.26	12	-1.6	0.0546	547	0.909	0.945	17510	0.975	-0.258	1.26
KCND1	-8.24	12	-1.6	0.055	548	0.909	0.945	17509	0.975	-0.239	1.26
PPP2R5A	-8.24	12	-1.6	0.055	549	0.909	0.945	17508	0.975	-0.22	1.26
METTL7B	-8.24	12	-1.6	0.0551	550	0.909	0.945	17507	0.975	-0.353	1.26
DKK1	-8.23	12	-1.6	0.0552	551	0.909	0.945	17506	0.974	-0.245	1.26
HPSE2	-8.23	12	-1.6	0.0553	552	0.909	0.945	17505	0.974	-0.42	1.26
NUDT16	-8.23	12	-1.6	0.0553	553	0.909	0.945	17504	0.974	-0.291	1.26
PKD2L2	-8.23	12	-1.6	0.0553	554	0.909	0.945	17503	0.974	-0.153	1.26
HOXB1	-8.22	12	-1.59	0.0555	555	0.909	0.945	17502	0.974	-0.246	1.26
RAD17	-8.22	12	-1.59	0.0555	556	0.909	0.945	17501	0.974	-0.065	1.26
NBAS	-8.21	12	-1.59	0.0555	557	0.909	0.944	17500	0.974	-0.423	1.26
AMBRA1	-8.21	12	-1.59	0.0556	558	0.909	0.944	17499	0.974	-0.188	1.25
SLC39A2	-8.21	12	-1.59	0.0556	559	0.909	0.944	17498	0.974	-0.276	1.25
USP4	-8.21	12	-1.59	0.0556	560	0.909	0.944	17497	0.974	-0.159	1.25
GLTSCR1	-8.21	12	-1.59	0.0556	561	0.909	0.944	17496	0.974	-0.07	1.25
BEST2	-8.2	12	-1.59	0.0558	562	0.909	0.944	17495	0.974	-0.228	1.25
DEPDC5	-8.2	12	-1.59	0.0559	563	0.909	0.944	17494	0.974	-0.12	1.25
BBS1	-8.19	12	-1.59	0.0561	564	0.909	0.944	17493	0.974	-0.222	1.25
BARHL2	-8.19	12	-1.59	0.0561	565	0.909	0.944	17492	0.974	-0.348	1.25
JAK3	-8.18	12	-1.59	0.0562	566	0.909	0.944	17491	0.974	-0.152	1.25
C11orf65	-8.18	12	-1.59	0.0563	567	0.909	0.944	17490	0.974	-0.296	1.25
ZBED2	-8.18	12	-1.59	0.0563	568	0.909	0.944	17489	0.974	-0.257	1.25
ANKRD13C	-8.18	12	-1.59	0.0563	569	0.909	0.944	17488	0.974	-0.248	1.25
CMTR2	-8.17	12	-1.58	0.0565	570	0.909	0.943	17487	0.974	-0.441	1.25
SNX32	-8.15	12	-1.58	0.0568	571	0.909	0.943	17486	0.974	-0.218	1.25
C16orf87	-8.15	12	-1.58	0.0569	572	0.909	0.943	17485	0.974	-0.256	1.24
KIFAP3	-8.15	12	-1.58	0.057	573	0.909	0.943	17484	0.974	-0.272	1.24
RABL3	-8.15	12	-1.58	0.057	574	0.909	0.943	17483	0.974	-0.327	1.24
DDAH1	-8.15	12	-1.58	0.057	575	0.909	0.943	17482	0.974	-0.263	1.24
STXBP3	-8.14	12	-1.58	0.0571	576	0.909	0.943	17481	0.974	-0.322	1.24
ATP6V0A2	-8.14	12	-1.58	0.0571	577	0.909	0.943	17480	0.974	-0.339	1.24
OTOS	-8.13	12	-1.58	0.0573	578	0.909	0.943	17479	0.974	-0.261	1.24
CD86	-8.13	12	-1.58	0.0573	579	0.909	0.943	17478	0.974	-0.383	1.24
PBX2	-8.13	12	-1.58	0.0573	580	0.909	0.943	17477	0.974	-0.193	1.24
DNASE1L3	-8.13	12	-1.58	0.0574	581	0.909	0.943	17476	0.974	-0.343	1.24
IGF1	-8.13	12	-1.58	0.0574	582	0.909	0.943	17475	0.974	-0.147	1.24
PHKA1	-8.12	12	-1.58	0.0575	583	0.909	0.943	17474	0.974	-0.318	1.24
SPDYA	-8.12	12	-1.58	0.0576	584	0.909	0.942	17473	0.974	-0.113	1.24
TNNI1	-8.12	12	-1.57	0.0577	585	0.909	0.942	17472	0.974	-0.121	1.24
SH2D5	-8.1	12	-1.57	0.0579	586	0.909	0.942	17471	0.974	-0.17	1.24
FIBIN	-8.1	12	-1.57	0.058	587	0.909	0.942	17470	0.974	-0.308	1.24
CCDC3	-8.1	12	-1.57	0.058	588	0.909	0.942	17469	0.974	-0.072	1.24
KCNQ4	-8.1	12	-1.57	0.0581	589	0.909	0.942	17468	0.974	-0.306	1.24
FXYD1	-8.09	12	-1.57	0.0582	590	0.909	0.942	17467	0.974	-0.161	1.24
ATP1B2	-8.08	12	-1.57	0.0585	591	0.909	0.942	17466	0.973	-0.162	1.23
STXBP5L	-8.08	12	-1.57	0.0585	592	0.909	0.942	17465	0.973	-0.276	1.23
TYW3	-8.08	12	-1.57	0.0585	593	0.909	0.941	17464	0.973	-0.221	1.23
SFSWAP	-8.08	12	-1.57	0.0585	594	0.909	0.941	17463	0.973	-0.452	1.23
PATL2	-8.07	12	-1.57	0.0588	595	0.909	0.941	17462	0.973	-0.188	1.23
SMYD2	-8.06	12	-1.57	0.0588	596	0.909	0.941	17461	0.973	-0.112	1.23
FAM134B	-8.06	12	-1.56	0.0588	597	0.909	0.941	17460	0.973	-0.212	1.23
CLEC2D	-8.06	12	-1.56	0.0588	598	0.909	0.941	17459	0.973	-0.34	1.23
GPATCH8	-8.06	12	-1.56	0.0588	599	0.909	0.941	17458	0.973	-0.357	1.23
C1QL1	-8.06	12	-1.56	0.059	600	0.909	0.941	17457	0.973	-0.181	1.23
TMEM234	-8.05	12	-1.56	0.059	601	0.909	0.941	17456	0.973	-0.29	1.23
DNAJB13	-8.05	12	-1.56	0.0591	602	0.909	0.941	17455	0.973	-0.118	1.23
PPARGC1A	-8.05	12	-1.56	0.0592	603	0.909	0.941	17454	0.973	-0.231	1.23
TBC1D12	-8.04	12	-1.56	0.0593	604	0.909	0.941	17453	0.973	-0.144	1.23
TCEA2	-8.04	12	-1.56	0.0593	605	0.909	0.941	17452	0.973	-0.18	1.23
CCDC159	-8.04	12	-1.56	0.0593	606	0.909	0.941	17451	0.973	-0.182	1.23
CADM2	-8.04	12	-1.56	0.0594	607	0.909	0.941	17450	0.973	-0.19	1.23
COL11A2	-8.03	12	-1.56	0.0595	608	0.909	0.941	17449	0.973	-0.248	1.23
LPAR1	-8.03	12	-1.56	0.0595	609	0.909	0.94	17448	0.973	-0.315	1.23
TACC2	-8.02	12	-1.56	0.0598	610	0.909	0.94	17447	0.973	-0.129	1.22
RAB18	-8.02	12	-1.56	0.0598	611	0.909	0.94	17446	0.973	-0.301	1.22
TTC40	-8.01	12	-1.55	0.06	612	0.909	0.94	17445	0.973	-0.111	1.22
LMO4	-8	12	-1.55	0.0602	613	0.909	0.94	17444	0.973	-0.122	1.22
LRP4	-8	12	-1.55	0.0602	614	0.909	0.94	17443	0.973	-0.144	1.22
MTMR8	-8	12	-1.55	0.0603	615	0.909	0.94	17442	0.973	-0.397	1.22
HLA-DRA	-7.99	12	-1.55	0.0604	616	0.909	0.94	17441	0.973	-0.191	1.22
MLLT3	-7.99	12	-1.55	0.0605	617	0.909	0.94	17440	0.973	-0.18	1.22
SELP	-7.99	12	-1.55	0.0605	618	0.909	0.94	17439	0.973	-0.165	1.22
OR8H2	-3.99	3	-1.55	0.0605	619	0.909	0.94	17438	0.973	-0.222	1.22
NPFFR2	-7.99	12	-1.55	0.0605	620	0.909	0.94	17437	0.973	-0.1	1.22
ANKRD13D	-7.99	12	-1.55	0.0605	621	0.909	0.939	17436	0.973	-0.135	1.22
VHLL	-7.98	12	-1.55	0.0606	622	0.909	0.939	17435	0.973	-0.068	1.22
MOV10L1	-7.98	12	-1.55	0.0607	623	0.909	0.939	17434	0.973	-0.16	1.22
HIST2H2AC	-3.99	3	-1.55	0.0608	624	0.909	0.939	17433	0.973	-0.752	1.22
OVOL1	-7.97	12	-1.55	0.0608	625	0.909	0.939	17432	0.973	-0.245	1.22
SCGB2A1	-6.9	9	-1.55	0.0609	626	0.909	0.939	17431	0.973	-0.004	1.22
TOMM5	-7.97	12	-1.55	0.0609	627	0.909	0.939	17430	0.973	-0.231	1.22
TICRR	-7.96	12	-1.55	0.061	628	0.909	0.939	17429	0.973	-0.508	1.21
PSMB1	-7.96	12	-1.55	0.0611	629	0.909	0.939	17428	0.973	-0.135	1.21
SUSD3	-7.95	12	-1.54	0.0613	630	0.909	0.939	17427	0.973	-0.281	1.21
PSEN2	-7.95	12	-1.54	0.0614	631	0.909	0.939	17426	0.973	-0.17	1.21
HTR3C	-7.95	12	-1.54	0.0615	632	0.909	0.939	17425	0.973	-0.177	1.21
PHF3	-7.94	12	-1.54	0.0615	633	0.909	0.938	17424	0.973	-0.064	1.21
ZNF92	-3.97	3	-1.54	0.0615	634	0.909	0.938	17423	0.973	-0.449	1.21
SUV39H1	-7.94	12	-1.54	0.0616	635	0.909	0.938	17422	0.973	-0.284	1.21
PBX1	-7.94	12	-1.54	0.0617	636	0.909	0.938	17421	0.973	-0.233	1.21
RP1	-7.93	12	-1.54	0.0618	637	0.909	0.938	17420	0.972	-0.101	1.21
ANKRD35	-7.92	12	-1.54	0.062	638	0.909	0.938	17419	0.972	-0.156	1.21
SLC4A4	-7.92	12	-1.54	0.062	639	0.909	0.938	17418	0.972	-0.225	1.21
DDX60L	-7.92	12	-1.54	0.0621	640	0.909	0.938	17417	0.972	-0.194	1.21
CD8B	-7.91	12	-1.54	0.0622	641	0.909	0.938	17416	0.972	-0.148	1.21
LMO2	-7.91	12	-1.54	0.0622	642	0.909	0.938	17415	0.972	-0.148	1.21
DENND1B	-7.91	12	-1.53	0.0624	643	0.909	0.938	17414	0.972	-0.283	1.2
MYB	-7.89	12	-1.53	0.0627	644	0.909	0.937	17413	0.972	-0.241	1.2
ITGB3	-7.89	12	-1.53	0.0627	645	0.909	0.937	17412	0.972	-0.349	1.2
LDLR	-7.89	12	-1.53	0.0627	646	0.909	0.937	17411	0.972	-0.148	1.2
MAOB	-7.89	12	-1.53	0.0628	647	0.909	0.937	17410	0.972	-0.274	1.2
FGD2	-7.88	12	-1.53	0.063	648	0.909	0.937	17409	0.972	-0.184	1.2
GPC6	-7.88	12	-1.53	0.063	649	0.909	0.937	17408	0.972	-0.123	1.2
PSMB11	-7.88	12	-1.53	0.063	650	0.909	0.937	17407	0.972	-0.173	1.2
NR2F2	-7.87	12	-1.53	0.0632	651	0.909	0.937	17406	0.972	-0.294	1.2
CCL24	-7.87	12	-1.53	0.0633	652	0.909	0.937	17405	0.972	-0.238	1.2
SLAMF9	-7.86	12	-1.53	0.0634	653	0.909	0.937	17404	0.972	-0.195	1.2
CSDE1	-7.86	12	-1.53	0.0635	654	0.909	0.936	17403	0.972	-0.216	1.2
NMU	-7.86	12	-1.53	0.0636	655	0.909	0.936	17402	0.972	-0.186	1.2
HIF1AN	-7.85	12	-1.52	0.0637	656	0.909	0.936	17401	0.972	-0.358	1.2
PFN1	-7.85	12	-1.52	0.0637	657	0.909	0.936	17400	0.972	-0.351	1.2
BOLA1	-7.84	12	-1.52	0.0639	658	0.909	0.936	17399	0.971	-0.136	1.19
RIC8A	-7.84	12	-1.52	0.0639	659	0.909	0.936	17398	0.971	-0.049	1.19
ZNF35	-7.84	12	-1.52	0.064	660	0.909	0.936	17397	0.971	-0.355	1.19
GJA5	-7.84	12	-1.52	0.0641	661	0.909	0.936	17396	0.971	-0.348	1.19
PCDHA5	-7.83	12	-1.52	0.0641	662	0.909	0.936	17395	0.971	-0.199	1.19
HIRA	-7.83	12	-1.52	0.0642	663	0.909	0.936	17394	0.971	-0.39	1.19
SLC12A6	-7.8	12	-1.52	0.0648	664	0.909	0.935	17393	0.971	-0.194	1.19
ARRDC2	-7.8	12	-1.52	0.0649	665	0.909	0.935	17392	0.971	-0.313	1.19
SYT9	-7.8	12	-1.51	0.0649	666	0.909	0.935	17391	0.971	-0.103	1.19
SLCO2B1	-7.79	12	-1.51	0.0652	667	0.909	0.935	17390	0.971	-0.171	1.19
HIST1H3A	-7.79	12	-1.51	0.0652	668	0.909	0.935	17389	0.971	-0.117	1.19
F2R	-7.78	12	-1.51	0.0653	669	0.909	0.935	17388	0.971	-0.302	1.19
UGT1A9	-3.89	3	-1.51	0.0655	670	0.909	0.935	17387	0.971	-0.207	1.18
LacZ	-38.09	288	-1.51	0.0655	671	0.909	0.935	17386	0.971	0.063	1.18
RNASEL	-7.77	12	-1.51	0.0657	672	0.909	0.934	17385	0.97	-0.281	1.18
ZKSCAN4	-7.77	12	-1.51	0.0657	673	0.909	0.934	17384	0.97	-0.23	1.18
HOOK2	-7.76	12	-1.51	0.0658	674	0.909	0.934	17383	0.97	-0.214	1.18
GSPT2	-7.76	12	-1.51	0.0658	675	0.909	0.934	17382	0.97	-0.153	1.18
AQP11	-7.76	12	-1.51	0.0658	676	0.909	0.934	17381	0.97	-0.167	1.18
NAT8	-7.75	12	-1.51	0.0661	677	0.909	0.934	17380	0.97	-0.296	1.18
PRG3	-7.75	12	-1.51	0.0662	678	0.909	0.934	17379	0.97	-0.141	1.18
USH1C	-7.74	12	-1.5	0.0664	679	0.909	0.934	17378	0.97	-0.179	1.18
E2F7	-7.74	12	-1.5	0.0664	680	0.909	0.934	17377	0.97	-0.057	1.18
ZNF484	-7.73	12	-1.5	0.0665	681	0.909	0.933	17376	0.97	-0.303	1.18
WFDC8	-7.73	12	-1.5	0.0666	682	0.909	0.933	17375	0.97	-0.239	1.18
TSPO2	-7.73	12	-1.5	0.0666	683	0.909	0.933	17374	0.97	-0.17	1.18
LEPR	-7.73	12	-1.5	0.0667	684	0.909	0.933	17373	0.97	-0.237	1.18
CSAD	-7.72	12	-1.5	0.0668	685	0.909	0.933	17372	0.97	-0.181	1.18
OR2AK2	-7.71	12	-1.5	0.067	686	0.909	0.933	17371	0.97	-0.169	1.17
CUX1	-7.71	12	-1.5	0.067	687	0.909	0.933	17370	0.97	-0.183	1.17
KLF10	-7.71	12	-1.5	0.0671	688	0.909	0.933	17369	0.97	-0.248	1.17
MAP4	-7.71	12	-1.5	0.0671	689	0.909	0.933	17368	0.97	-0.245	1.17
TEAD4	-7.71	12	-1.5	0.0672	690	0.909	0.933	17367	0.97	-0.188	1.17
HUS1	-7.7	12	-1.5	0.0672	691	0.909	0.933	17366	0.97	-0.238	1.17
SLTM	-7.7	12	-1.5	0.0673	692	0.909	0.933	17365	0.97	-0.087	1.17
DHX29	-7.7	12	-1.5	0.0673	693	0.909	0.933	17364	0.97	-0.075	1.17
VPREB1	-7.7	12	-1.5	0.0673	694	0.909	0.933	17363	0.97	-0.214	1.17
CDC20B	-7.7	12	-1.5	0.0674	695	0.909	0.933	17362	0.97	-0.175	1.17
TMEM210	-7.7	12	-1.5	0.0674	696	0.909	0.933	17361	0.97	-0.188	1.17
RARRES3	-7.7	12	-1.5	0.0674	697	0.909	0.933	17360	0.97	-0.129	1.17
CDK5	-7.69	12	-1.49	0.0675	698	0.909	0.932	17359	0.97	-0.239	1.17
TRIM38	-7.69	12	-1.49	0.0675	699	0.909	0.932	17358	0.97	-0.263	1.17
KRT77	-7.69	12	-1.49	0.0675	700	0.909	0.932	17357	0.97	-0.137	1.17
PPT2	-7.69	12	-1.49	0.0676	701	0.909	0.932	17356	0.97	-0.186	1.17
HGFAC	-7.69	12	-1.49	0.0676	702	0.909	0.932	17355	0.97	-0.149	1.17
B3GNT1	-7.69	12	-1.49	0.0677	703	0.909	0.932	17354	0.97	-0.091	1.17
MEF2D	-7.68	12	-1.49	0.0678	704	0.909	0.932	17353	0.97	-0.247	1.17
HGF	-7.68	12	-1.49	0.0679	705	0.909	0.932	17352	0.97	-0.217	1.17
ZNF682	-7.67	12	-1.49	0.068	706	0.909	0.932	17351	0.97	-0.035	1.17
PLEKHH3	-7.66	12	-1.49	0.0682	707	0.909	0.932	17350	0.97	-0.217	1.17
BHMT2	-7.66	12	-1.49	0.0683	708	0.909	0.932	17349	0.97	-0.2	1.17
PARL	-7.66	12	-1.49	0.0683	709	0.909	0.932	17348	0.97	-0.448	1.17
TGFA	-7.66	12	-1.49	0.0683	710	0.909	0.932	17347	0.97	0	1.17
STRN	-7.66	12	-1.49	0.0684	711	0.909	0.932	17346	0.97	-0.217	1.16
LETMD1	-7.66	12	-1.49	0.0684	712	0.909	0.932	17345	0.97	-0.224	1.16
WHSC1	-7.65	12	-1.49	0.0685	713	0.909	0.932	17344	0.97	-0.259	1.16
TMEM194A	-7.65	12	-1.49	0.0686	714	0.909	0.931	17343	0.97	-0.489	1.16
GPR37	-7.65	12	-1.49	0.0686	715	0.909	0.931	17342	0.97	-0.248	1.16
RASAL2	-7.65	12	-1.49	0.0687	716	0.909	0.931	17341	0.97	-0.141	1.16
FAM187B	-7.65	12	-1.49	0.0687	717	0.909	0.931	17340	0.97	0.072	1.16
ANXA3	-7.65	12	-1.49	0.0687	718	0.909	0.931	17339	0.97	-0.164	1.16
PCNXL3	-7.64	12	-1.48	0.0688	719	0.909	0.931	17338	0.97	-0.256	1.16
BLVRB	-7.63	12	-1.48	0.069	720	0.909	0.931	17337	0.97	-0.212	1.16
TMEM138	-7.63	12	-1.48	0.069	721	0.909	0.931	17336	0.97	-0.301	1.16
ANKRD30B	-7.63	12	-1.48	0.0691	722	0.909	0.931	17335	0.97	-0.373	1.16
NEUROD4	-7.62	12	-1.48	0.0693	723	0.909	0.931	17334	0.969	-0.142	1.16
TMEM14E	-7.62	12	-1.48	0.0693	724	0.909	0.931	17333	0.969	-0.152	1.16
LPO	-7.62	12	-1.48	0.0693	725	0.909	0.931	17332	0.969	-0.395	1.16
ARPC5	-7.61	12	-1.48	0.0695	726	0.909	0.931	17331	0.969	-0.279	1.16
ITGB6	-7.61	12	-1.48	0.0695	727	0.909	0.93	17330	0.969	-0.213	1.16
SPRY1	-7.61	12	-1.48	0.0695	728	0.909	0.93	17329	0.969	-0.199	1.16
SERPINA5	-7.61	12	-1.48	0.0696	729	0.909	0.93	17328	0.969	-0.22	1.16
PARP3	-7.6	12	-1.48	0.0697	730	0.909	0.93	17327	0.969	-0.194	1.16
DVL1	-7.6	12	-1.48	0.0698	731	0.909	0.93	17326	0.969	-0.066	1.16
CPA5	-7.6	12	-1.48	0.0698	732	0.909	0.93	17325	0.969	-0.1	1.16
ITLN1	-7.6	12	-1.48	0.0698	733	0.909	0.93	17324	0.969	-0.134	1.16
ZDHHC24	-7.6	12	-1.48	0.0699	734	0.909	0.93	17323	0.969	-0.286	1.16
SDC2	-7.6	12	-1.48	0.07	735	0.909	0.93	17322	0.969	-0.185	1.15
AADACL4	-7.59	12	-1.48	0.07	736	0.909	0.93	17321	0.969	-0.096	1.15
C5orf64	-7.59	12	-1.48	0.07	737	0.909	0.93	17320	0.969	-0.191	1.15
MMEL1	-7.59	12	-1.48	0.07	738	0.909	0.93	17319	0.969	-0.062	1.15
GORASP1	-7.59	12	-1.48	0.07	739	0.909	0.93	17318	0.969	-0.234	1.15
TULP2	-7.59	12	-1.47	0.0701	740	0.909	0.93	17317	0.969	-0.724	1.15
ECSIT	-7.59	12	-1.47	0.0702	741	0.909	0.93	17316	0.969	-0.128	1.15
GSTM3	-7.58	12	-1.47	0.0702	742	0.909	0.93	17315	0.969	-0.178	1.15
PRICKLE2	-7.58	12	-1.47	0.0703	743	0.909	0.93	17314	0.969	-0.083	1.15
OR9A4	-7.58	12	-1.47	0.0703	744	0.909	0.93	17313	0.969	-0.26	1.15
CPN2	-7.58	12	-1.47	0.0703	745	0.909	0.93	17312	0.969	-0.064	1.15
WBP1	-7.58	12	-1.47	0.0703	746	0.909	0.93	17311	0.969	-0.145	1.15
RNF145	-7.58	12	-1.47	0.0704	747	0.909	0.93	17310	0.969	-0.025	1.15
FOXQ1	-7.58	12	-1.47	0.0704	748	0.909	0.93	17309	0.969	-0.103	1.15
ILDR2	-7.58	12	-1.47	0.0704	749	0.909	0.93	17308	0.969	-0.157	1.15
FBXO3	-7.58	12	-1.47	0.0705	750	0.909	0.93	17307	0.969	-0.041	1.15
RHCG	-7.57	12	-1.47	0.0706	751	0.909	0.929	17306	0.969	-0.292	1.15
NR1H3	-7.56	12	-1.47	0.0709	752	0.909	0.929	17305	0.969	-0.12	1.15
CPOX	-7.56	12	-1.47	0.0709	753	0.909	0.929	17304	0.969	-0.093	1.15
OR13C9	-7.56	12	-1.47	0.0709	754	0.909	0.929	17303	0.969	-0.007	1.15
GPR161	-7.55	12	-1.47	0.071	755	0.909	0.929	17302	0.969	-0.19	1.15
NUP37	-7.54	12	-1.47	0.0713	756	0.909	0.929	17301	0.969	-0.179	1.15
ZNF112	-7.54	12	-1.47	0.0713	757	0.909	0.929	17300	0.969	-0.071	1.15
FUT4	-7.54	12	-1.47	0.0714	758	0.909	0.929	17299	0.969	-0.194	1.15
EHD4	-7.54	12	-1.47	0.0714	759	0.909	0.929	17298	0.969	-0.245	1.15
RRP36	-7.54	12	-1.47	0.0714	760	0.909	0.929	17297	0.969	-0.408	1.15
GPR107	-7.54	12	-1.46	0.0715	761	0.909	0.929	17296	0.969	-0.173	1.15
C1orf43	-7.53	12	-1.46	0.0716	762	0.909	0.928	17295	0.969	-0.237	1.15
REXO1	-7.53	12	-1.46	0.0717	763	0.909	0.928	17294	0.969	-0.301	1.14
HSF2BP	-7.52	12	-1.46	0.0719	764	0.909	0.928	17293	0.969	-0.036	1.14
PAQR9	-7.52	12	-1.46	0.0719	765	0.909	0.928	17292	0.969	-0.259	1.14
UNC119	-7.52	12	-1.46	0.072	766	0.909	0.928	17291	0.969	-0.299	1.14
OR7D2	-7.51	12	-1.46	0.072	767	0.909	0.928	17290	0.969	-0.348	1.14
PRODH2	-7.51	12	-1.46	0.0721	768	0.909	0.928	17289	0.969	-0.145	1.14
CNOT1	-7.5	12	-1.46	0.0723	769	0.909	0.928	17288	0.969	-0.104	1.14
CTTN	-7.5	12	-1.46	0.0723	770	0.909	0.928	17287	0.969	-0.235	1.14
FKBP2	-7.5	12	-1.46	0.0724	771	0.909	0.928	17286	0.969	-0.206	1.14
EP400NL	-7.5	12	-1.46	0.0724	772	0.909	0.928	17285	0.969	-0.27	1.14
KLC4	-7.5	12	-1.46	0.0724	773	0.909	0.928	17284	0.969	-0.017	1.14
C6orf25	-7.5	12	-1.46	0.0724	774	0.909	0.928	17283	0.969	-0.174	1.14
PRX	-7.48	12	-1.46	0.0728	775	0.909	0.927	17282	0.969	-0.217	1.14
RARA	-7.48	12	-1.46	0.0728	776	0.909	0.927	17281	0.969	-0.322	1.14
RNASE12	-7.48	12	-1.46	0.0728	777	0.909	0.927	17280	0.969	-0.306	1.14
HOOK1	-7.48	12	-1.45	0.0728	778	0.909	0.927	17279	0.969	-0.349	1.14
CREG1	-7.48	12	-1.45	0.0729	779	0.909	0.927	17278	0.969	-0.132	1.14
DCAF15	-7.48	12	-1.45	0.0729	780	0.909	0.927	17277	0.969	-0.021	1.14
SYT6	-7.48	12	-1.45	0.0729	781	0.909	0.927	17276	0.969	-0.221	1.14
C11orf44	-7.48	12	-1.45	0.073	782	0.909	0.927	17275	0.969	-0.156	1.14
CD48	-7.48	12	-1.45	0.073	783	0.909	0.927	17274	0.969	-0.193	1.14
SDR9C7	-7.48	12	-1.45	0.073	784	0.909	0.927	17273	0.969	-0.448	1.14
SVOPL	-7.47	12	-1.45	0.0731	785	0.909	0.927	17272	0.969	-0.225	1.14
SEMA4D	-7.47	12	-1.45	0.0733	786	0.909	0.927	17271	0.969	-0.233	1.13
FAM149B1	-7.47	12	-1.45	0.0733	787	0.909	0.927	17270	0.969	-0.265	1.13
FRMD3	-7.47	12	-1.45	0.0733	788	0.909	0.927	17269	0.969	-0.177	1.13
MCOLN1	-7.46	12	-1.45	0.0733	789	0.909	0.927	17268	0.969	-0.159	1.13
ITPK1	-7.45	12	-1.45	0.0736	790	0.909	0.926	17267	0.969	-0.086	1.13
GPC5	-7.45	12	-1.45	0.0736	791	0.909	0.926	17266	0.969	-0.375	1.13
ANKRD53	-7.45	12	-1.45	0.0738	792	0.909	0.926	17265	0.969	-0.23	1.13
COL24A1	-7.44	12	-1.45	0.0739	793	0.909	0.926	17264	0.969	-0.071	1.13
TUBG2	-7.44	12	-1.45	0.0739	794	0.909	0.926	17263	0.969	-0.167	1.13
GLG1	-7.44	12	-1.45	0.074	795	0.909	0.926	17262	0.969	-0.231	1.13
BPIFB4	-7.44	12	-1.45	0.0741	796	0.909	0.926	17261	0.969	-0.271	1.13
WSB1	-7.43	12	-1.45	0.0742	797	0.909	0.926	17260	0.969	-0.304	1.13
PDIA3	-7.43	12	-1.44	0.0743	798	0.909	0.926	17259	0.968	-0.272	1.13
TRAPPC13	-7.43	12	-1.44	0.0744	799	0.909	0.926	17258	0.968	-0.295	1.13
RPS6KB1	-7.42	12	-1.44	0.0745	800	0.909	0.926	17257	0.968	-0.154	1.13
NDUFA6	-7.42	12	-1.44	0.0745	801	0.909	0.926	17256	0.968	-0.309	1.13
CCKAR	-7.42	12	-1.44	0.0745	802	0.909	0.926	17255	0.968	-0.169	1.13
ITLN2	-7.42	12	-1.44	0.0745	803	0.909	0.926	17254	0.968	-0.092	1.13
IMPAD1	-7.42	12	-1.44	0.0745	804	0.909	0.925	17253	0.968	-0.201	1.13
KNTC1	-7.42	12	-1.44	0.0745	805	0.909	0.925	17252	0.968	-0.161	1.13
TBX10	-7.42	12	-1.44	0.0746	806	0.909	0.925	17251	0.968	-0.145	1.13
GPR182	-7.41	12	-1.44	0.0747	807	0.909	0.925	17250	0.968	-0.267	1.13
CACNB1	-7.41	12	-1.44	0.0748	808	0.909	0.925	17249	0.968	-0.162	1.13
CLEC17A	-7.41	12	-1.44	0.0749	809	0.909	0.925	17248	0.968	-0.19	1.13
GLI1	-7.4	12	-1.44	0.0751	810	0.909	0.925	17247	0.968	-0.343	1.12
CLCA4	-7.39	12	-1.44	0.0754	811	0.909	0.925	17246	0.968	-0.212	1.12
AKAP10	-7.39	12	-1.44	0.0754	812	0.909	0.925	17245	0.968	-0.14	1.12
FAM50B	-7.39	12	-1.44	0.0754	813	0.909	0.925	17244	0.968	-0.169	1.12
TEX33	-7.38	12	-1.44	0.0755	814	0.909	0.924	17243	0.968	-0.248	1.12
MTCH2	-7.38	12	-1.44	0.0756	815	0.909	0.924	17242	0.968	-0.284	1.12
SYAP1	-7.38	12	-1.43	0.0757	816	0.909	0.924	17241	0.968	-0.09	1.12
AMMECR1L	-7.37	12	-1.43	0.0757	817	0.909	0.924	17240	0.968	-0.068	1.12
APOA2	-7.37	12	-1.43	0.0758	818	0.909	0.924	17239	0.968	-0.203	1.12
SPIRE2	-7.37	12	-1.43	0.0758	819	0.909	0.924	17238	0.968	-0.223	1.12
ZNF570	-7.37	12	-1.43	0.0758	820	0.909	0.924	17237	0.968	-0.245	1.12
DCN	-7.37	12	-1.43	0.0759	821	0.909	0.924	17236	0.968	-0.107	1.12
SULT1A1	-5.21	6	-1.43	0.076	822	0.909	0.924	17235	0.968	-0.244	1.12
C11orf49	-7.36	12	-1.43	0.0761	823	0.909	0.924	17234	0.968	-0.352	1.12
CS	-7.36	12	-1.43	0.0761	824	0.909	0.924	17233	0.968	0.1	1.12
OR7G3	-7.36	12	-1.43	0.0762	825	0.909	0.924	17232	0.968	-0.308	1.12
CRKL	-7.36	12	-1.43	0.0762	826	0.909	0.924	17231	0.968	-0.329	1.12
C7orf49	-7.36	12	-1.43	0.0762	827	0.909	0.924	17230	0.968	-0.153	1.12
PTPN23	-7.35	12	-1.43	0.0763	828	0.909	0.924	17229	0.968	-0.402	1.12
CLDN4	-7.35	12	-1.43	0.0763	829	0.909	0.924	17228	0.968	-0.257	1.12
GLYR1	-7.35	12	-1.43	0.0764	830	0.909	0.924	17227	0.968	-0.094	1.12
ANKRD18B	-3.68	3	-1.43	0.0764	831	0.909	0.924	17226	0.968	-0.256	1.12
MAGEB17	-7.35	12	-1.43	0.0764	832	0.909	0.924	17225	0.968	-0.082	1.12
NDRG2	-7.35	12	-1.43	0.0765	833	0.909	0.924	17224	0.968	-0.213	1.12
TRIB1	-7.34	12	-1.43	0.0766	834	0.909	0.923	17223	0.968	-0.307	1.12
ZDHHC11	-7.34	12	-1.43	0.0766	835	0.909	0.923	17222	0.968	-0.318	1.12
ADRB1	-7.34	12	-1.43	0.0767	836	0.909	0.923	17221	0.968	-0.21	1.12
EFNA3	-7.34	12	-1.43	0.0767	837	0.909	0.923	17220	0.968	-0.209	1.12
CCDC158	-7.33	12	-1.43	0.0768	838	0.909	0.923	17219	0.968	-0.131	1.11
DPP9	-7.33	12	-1.43	0.077	839	0.909	0.923	17218	0.968	-0.251	1.11
HSPB3	-7.33	12	-1.43	0.077	840	0.909	0.923	17217	0.968	-0.238	1.11
GPR176	-7.33	12	-1.42	0.0771	841	0.909	0.923	17216	0.968	-0.216	1.11
NUDT22	-7.33	12	-1.42	0.0771	842	0.909	0.923	17215	0.968	-0.212	1.11
GSTM4	-7.31	12	-1.42	0.0774	843	0.909	0.923	17214	0.968	-0.259	1.11
CLDN2	-7.31	12	-1.42	0.0774	844	0.909	0.923	17213	0.968	-0.189	1.11
TSC22D4	-7.31	12	-1.42	0.0775	845	0.909	0.922	17212	0.968	-0.328	1.11
CPT1C	-7.31	12	-1.42	0.0776	846	0.909	0.922	17211	0.968	-0.113	1.11
RAB14	-7.3	12	-1.42	0.0777	847	0.909	0.922	17210	0.968	-0.171	1.11
ALAS1	-7.3	12	-1.42	0.0778	848	0.909	0.922	17209	0.968	-0.122	1.11
ADSSL1	-7.3	12	-1.42	0.0779	849	0.909	0.922	17208	0.968	-0.139	1.11
TUBB4A	-7.29	12	-1.42	0.0781	850	0.909	0.922	17207	0.967	-0.223	1.11
FAM150B	-7.29	12	-1.42	0.0781	851	0.909	0.922	17206	0.967	-0.164	1.11
GPR108	-7.29	12	-1.42	0.0782	852	0.909	0.922	17205	0.967	-0.207	1.11
FAM171B	-7.28	12	-1.42	0.0783	853	0.909	0.922	17204	0.967	-0.163	1.11
CYP2C8	-7.27	12	-1.42	0.0785	854	0.909	0.922	17203	0.967	-0.156	1.11
GNAQ	-7.27	12	-1.42	0.0785	855	0.909	0.922	17202	0.967	-0.261	1.11
BNC2	-7.27	12	-1.42	0.0785	856	0.909	0.921	17201	0.967	-0.193	1.11
MARC2	-7.27	12	-1.42	0.0785	857	0.909	0.921	17200	0.967	-0.176	1.11
GRM8	-7.27	12	-1.41	0.0785	858	0.909	0.921	17199	0.967	-0.294	1.11
OTUB1	-7.26	12	-1.41	0.0788	859	0.909	0.921	17198	0.967	-0.231	1.1
SLC26A7	-7.26	12	-1.41	0.079	860	0.909	0.921	17197	0.967	-0.139	1.1
ANKS6	-7.25	12	-1.41	0.0791	861	0.909	0.921	17196	0.967	-0.153	1.1
CGRRF1	-7.25	12	-1.41	0.0792	862	0.909	0.921	17195	0.967	-0.256	1.1
TAL2	-7.25	12	-1.41	0.0793	863	0.909	0.921	17194	0.967	-0.328	1.1
FITM1	-7.25	12	-1.41	0.0793	864	0.909	0.921	17193	0.967	-0.324	1.1
PHLDA3	-7.24	12	-1.41	0.0793	865	0.909	0.921	17192	0.967	-0.287	1.1
CDT1	-7.24	12	-1.41	0.0794	866	0.909	0.921	17191	0.967	-0.574	1.1
ADAMTS4	-7.24	12	-1.41	0.0794	867	0.909	0.921	17190	0.967	-0.127	1.1
BET1L	-7.24	12	-1.41	0.0795	868	0.909	0.92	17189	0.967	-0.319	1.1
TRAF3	-7.24	12	-1.41	0.0795	869	0.909	0.92	17188	0.967	-0.271	1.1
C2ORF15	-7.23	12	-1.41	0.0796	870	0.909	0.92	17187	0.967	-0.222	1.1
SLC7A6	-7.23	12	-1.41	0.0798	871	0.909	0.92	17186	0.967	-0.166	1.1
GSN	-7.23	12	-1.41	0.0798	872	0.909	0.92	17185	0.967	-0.089	1.1
MSANTD3	-7.22	12	-1.41	0.08	873	0.909	0.92	17184	0.967	-0.135	1.1
FKBP11	-7.22	12	-1.41	0.08	874	0.909	0.92	17183	0.967	-0.127	1.1
CHRDL2	-7.22	12	-1.4	0.0801	875	0.909	0.92	17182	0.967	-0.267	1.1
KLRC3	-7.21	12	-1.4	0.0802	876	0.909	0.92	17181	0.967	-0.171	1.1
QSER1	-7.21	12	-1.4	0.0803	877	0.909	0.92	17180	0.967	-0.303	1.1
MTX3	-7.21	12	-1.4	0.0803	878	0.909	0.92	17179	0.967	-0.199	1.1
NMNAT3	-7.21	12	-1.4	0.0804	879	0.909	0.92	17178	0.967	-0.23	1.09
ERI3	-7.21	12	-1.4	0.0804	880	0.909	0.92	17177	0.967	-0.217	1.09
CHSY3	-7.21	12	-1.4	0.0804	881	0.909	0.92	17176	0.967	-0.226	1.09
HMGCS2	-7.2	12	-1.4	0.0805	882	0.909	0.92	17175	0.967	-0.261	1.09
MYBPC3	-7.2	12	-1.4	0.0805	883	0.909	0.92	17174	0.967	-0.038	1.09
EDNRB	-7.2	12	-1.4	0.0807	884	0.909	0.919	17173	0.967	-0.213	1.09
RASL11A	-7.19	12	-1.4	0.0807	885	0.909	0.919	17172	0.967	-0.276	1.09
TSTA3	-7.19	12	-1.4	0.0808	886	0.909	0.919	17171	0.967	-0.111	1.09
C16orf72	-7.19	12	-1.4	0.081	887	0.909	0.919	17170	0.966	-0.085	1.09
HSD17B6	-7.18	12	-1.4	0.081	888	0.909	0.919	17169	0.966	-0.193	1.09
SLC4A1	-7.18	12	-1.4	0.0812	889	0.909	0.919	17168	0.966	-0.02	1.09
AQP10	-7.18	12	-1.4	0.0812	890	0.909	0.919	17167	0.966	-0.39	1.09
TTC13	-7.18	12	-1.4	0.0813	891	0.909	0.919	17166	0.966	-0.138	1.09
MGAT3	-7.17	12	-1.4	0.0814	892	0.909	0.919	17165	0.966	-0.294	1.09
TCERG1L	-7.17	12	-1.4	0.0815	893	0.909	0.919	17164	0.966	-0.233	1.09
OR10G6	-7.17	12	-1.39	0.0816	894	0.909	0.918	17163	0.966	-0.15	1.09
COPZ1	-7.16	12	-1.39	0.0817	895	0.909	0.918	17162	0.966	-0.342	1.09
MGLL	-7.16	12	-1.39	0.0818	896	0.909	0.918	17161	0.966	-0.184	1.09
TYW1	-7.16	12	-1.39	0.0818	897	0.909	0.918	17160	0.966	-0.332	1.09
DNAJB7	-7.16	12	-1.39	0.0819	898	0.909	0.918	17159	0.966	-0.257	1.09
MS4A10	-7.16	12	-1.39	0.0819	899	0.909	0.918	17158	0.966	-0.245	1.09
FADS1	-7.15	12	-1.39	0.082	900	0.909	0.918	17157	0.966	-0.161	1.09
OPRD1	-7.15	12	-1.39	0.082	901	0.909	0.918	17156	0.966	-0.136	1.09
AVPR1A	-7.15	12	-1.39	0.0821	902	0.909	0.918	17155	0.966	-0.228	1.09
CNTN4	-7.15	12	-1.39	0.0821	903	0.909	0.918	17154	0.966	-0.028	1.09
SLC17A4	-7.14	12	-1.39	0.0822	904	0.909	0.918	17153	0.966	-0.093	1.09
KRT74	-7.14	12	-1.39	0.0823	905	0.909	0.918	17152	0.966	-0.298	1.08
BARX1	-7.14	12	-1.39	0.0823	906	0.909	0.918	17151	0.966	-0.199	1.08
NEU1	-7.14	12	-1.39	0.0824	907	0.909	0.918	17150	0.966	-0.193	1.08
IRAK3	-7.13	12	-1.39	0.0825	908	0.909	0.917	17149	0.966	-0.139	1.08
CYP21A2	-7.13	12	-1.39	0.0826	909	0.909	0.917	17148	0.966	-0.167	1.08
TSTD1	-7.13	12	-1.39	0.0826	910	0.909	0.917	17147	0.966	-0.148	1.08
KRT80	-7.13	12	-1.39	0.0827	911	0.909	0.917	17146	0.966	-0.201	1.08
SCGB1A1	-7.12	12	-1.39	0.0827	912	0.909	0.917	17145	0.966	-0.187	1.08
KLF1	-7.12	12	-1.39	0.0829	913	0.909	0.917	17144	0.966	-0.149	1.08
C10orf35	-7.11	12	-1.38	0.0831	914	0.909	0.917	17143	0.966	-0.026	1.08
ZCCHC5	-7.11	12	-1.38	0.0831	915	0.909	0.917	17142	0.966	-0.099	1.08
PCK1	-7.11	12	-1.38	0.0832	916	0.909	0.917	17141	0.966	-0.088	1.08
AMHR2	-7.11	12	-1.38	0.0833	917	0.909	0.917	17140	0.966	-0.289	1.08
DDX3Y	-7.11	12	-1.38	0.0833	918	0.909	0.917	17139	0.966	-0.205	1.08
PABPC5	-7.1	12	-1.38	0.0834	919	0.909	0.917	17138	0.966	-0.03	1.08
ARL15	-7.1	12	-1.38	0.0835	920	0.909	0.917	17137	0.966	-0.126	1.08
SOCS1	-7.1	12	-1.38	0.0836	921	0.909	0.916	17136	0.966	-0.173	1.08
JMJD1C	-7.09	12	-1.38	0.0837	922	0.909	0.916	17135	0.966	-0.235	1.08
F11R	-7.09	12	-1.38	0.0837	923	0.909	0.916	17134	0.966	-0.236	1.08
PRKAB1	-7.09	12	-1.38	0.0837	924	0.909	0.916	17133	0.966	-0.088	1.08
HTR3E	-7.09	12	-1.38	0.0837	925	0.909	0.916	17132	0.966	-0.223	1.08
RHOD	-7.09	12	-1.38	0.0838	926	0.909	0.916	17131	0.966	-0.299	1.08
CACNA1G	-7.09	12	-1.38	0.0838	927	0.909	0.916	17130	0.966	-0.041	1.08
SELV	-7.09	12	-1.38	0.0838	928	0.909	0.916	17129	0.966	-0.078	1.08
ASB8	-7.08	12	-1.38	0.0839	929	0.909	0.916	17128	0.966	-0.085	1.08
ZDHHC3	-7.08	12	-1.38	0.0841	930	0.909	0.916	17127	0.966	-0.156	1.08
NPHS2	-7.07	12	-1.38	0.0843	931	0.909	0.916	17126	0.965	-0.347	1.07
GOLM1	-7.07	12	-1.38	0.0843	932	0.909	0.916	17125	0.965	-0.23	1.07
ANAPC7	-7.07	12	-1.38	0.0844	933	0.909	0.916	17124	0.965	-0.192	1.07
OR5K2	-3.53	3	-1.38	0.0844	934	0.909	0.916	17123	0.965	-0.192	1.07
FGD4	-7.07	12	-1.38	0.0844	935	0.909	0.916	17122	0.965	-0.098	1.07
PLEKHO1	-7.06	12	-1.38	0.0845	936	0.909	0.916	17121	0.965	-0.006	1.07
HHAT	-7.06	12	-1.37	0.0846	937	0.909	0.915	17120	0.965	-0.199	1.07
RAPGEF3	-7.06	12	-1.37	0.0846	938	0.909	0.915	17119	0.965	-0.034	1.07
PPP1R14D	-7.06	12	-1.37	0.0846	939	0.909	0.915	17118	0.965	-0.34	1.07
CCDC149	-7.06	12	-1.37	0.0847	940	0.909	0.915	17117	0.965	-0.378	1.07
TRAF5	-7.06	12	-1.37	0.0848	941	0.909	0.915	17116	0.965	-0.156	1.07
KRT75	-7.05	12	-1.37	0.0848	942	0.909	0.915	17115	0.965	-0.178	1.07
SLC6A5	-7.05	12	-1.37	0.0849	943	0.909	0.915	17114	0.965	-0.205	1.07
FSHB	-7.05	12	-1.37	0.0849	944	0.909	0.915	17113	0.965	-0.24	1.07
STARD9	-7.05	12	-1.37	0.085	945	0.909	0.915	17112	0.965	-0.24	1.07
GUCY2F	-7.05	12	-1.37	0.085	946	0.909	0.915	17111	0.965	-0.228	1.07
ABHD5	-7.04	12	-1.37	0.0851	947	0.909	0.915	17110	0.965	-0.15	1.07
MAP4K2	-7.04	12	-1.37	0.0852	948	0.909	0.915	17109	0.965	-0.186	1.07
LRRN3	-7.04	12	-1.37	0.0853	949	0.909	0.915	17108	0.965	-0.17	1.07
PYGL	-7.04	12	-1.37	0.0854	950	0.909	0.915	17107	0.965	-0.151	1.07
DNAJC7	-7.03	12	-1.37	0.0854	951	0.909	0.915	17106	0.965	-0.16	1.07
MICALCL	-7.03	12	-1.37	0.0854	952	0.909	0.915	17105	0.965	-0.194	1.07
KIF2A	-7.03	12	-1.37	0.0854	953	0.909	0.915	17104	0.965	-0.167	1.07
ST6GALNAC5	-7.03	12	-1.37	0.0854	954	0.909	0.915	17103	0.965	-0.229	1.07
DOCK11	-7.03	12	-1.37	0.0856	955	0.909	0.914	17102	0.965	-0.153	1.07
DOCK4	-7.03	12	-1.37	0.0856	956	0.909	0.914	17101	0.965	-0.283	1.07
CCDC88B	-7.02	12	-1.37	0.0857	957	0.909	0.914	17100	0.965	-0.315	1.07
OR10A6	-6.08	9	-1.37	0.0858	958	0.909	0.914	17099	0.965	-0.286	1.07
KCNJ11	-7.02	12	-1.37	0.0859	959	0.909	0.914	17098	0.965	-0.182	1.07
SLFN12	-7.02	12	-1.37	0.0859	960	0.909	0.914	17097	0.965	-0.127	1.07
NEUROD1	-7.01	12	-1.37	0.086	961	0.909	0.914	17096	0.965	-0.114	1.07
OR2G6	-7.01	12	-1.37	0.086	962	0.909	0.914	17095	0.965	-0.352	1.07
SUCO	-7.01	12	-1.37	0.0861	963	0.909	0.914	17094	0.965	-0.123	1.06
CD2AP	-7.01	12	-1.36	0.0861	964	0.909	0.914	17093	0.965	-0.012	1.06
TUFT1	-7	12	-1.36	0.0863	965	0.909	0.914	17092	0.965	-0.157	1.06
HSD17B4	-7	12	-1.36	0.0863	966	0.909	0.914	17091	0.965	-0.165	1.06
C2CD4D	-7	12	-1.36	0.0863	967	0.909	0.914	17090	0.965	-0.259	1.06
ABHD10	-7	12	-1.36	0.0865	968	0.909	0.914	17089	0.965	-0.22	1.06
DNAL4	-6.99	12	-1.36	0.0867	969	0.909	0.913	17088	0.965	-0.048	1.06
ADAM10	-6.99	12	-1.36	0.0867	970	0.909	0.913	17087	0.965	-0.179	1.06
FSTL5	-6.99	12	-1.36	0.0868	971	0.909	0.913	17086	0.965	-0.156	1.06
C1orf101	-6.99	12	-1.36	0.0868	972	0.909	0.913	17085	0.965	-0.181	1.06
FASLG	-6.99	12	-1.36	0.0868	973	0.909	0.913	17084	0.965	-0.215	1.06
APLNR	-6.99	12	-1.36	0.0868	974	0.909	0.913	17083	0.965	-0.267	1.06
KANSL3	-6.99	12	-1.36	0.0868	975	0.909	0.913	17082	0.965	-0.216	1.06
ZNF3	-6.98	12	-1.36	0.0869	976	0.909	0.913	17081	0.965	-0.183	1.06
VSTM1	-6.98	12	-1.36	0.087	977	0.909	0.913	17080	0.965	-0.15	1.06
ZNF423	-6.97	12	-1.36	0.0872	978	0.909	0.913	17079	0.965	-0.193	1.06
ZNF740	-6.97	12	-1.36	0.0873	979	0.909	0.913	17078	0.965	-0.225	1.06
FOXO1	-6.97	12	-1.36	0.0873	980	0.909	0.913	17077	0.965	-0.181	1.06
SGMS1	-6.97	12	-1.36	0.0873	981	0.909	0.913	17076	0.965	-0.15	1.06
PGLYRP3	-6.97	12	-1.36	0.0874	982	0.909	0.913	17075	0.965	-0.238	1.06
PYY	-6.96	12	-1.36	0.0875	983	0.909	0.913	17074	0.965	-0.197	1.06
KRTAP10-12	-3.48	3	-1.36	0.0876	984	0.909	0.912	17073	0.965	-0.296	1.06
PTPRU	-6.96	12	-1.36	0.0876	985	0.909	0.912	17072	0.965	-0.345	1.06
DIO3	-6.96	12	-1.35	0.0877	986	0.909	0.912	17071	0.965	-0.108	1.06
TAPBP	-6.95	12	-1.35	0.0878	987	0.909	0.912	17070	0.965	-0.146	1.06
ITGA10	-6.95	12	-1.35	0.0879	988	0.909	0.912	17069	0.965	-0.052	1.06
PARP4	-6.95	12	-1.35	0.088	989	0.909	0.912	17068	0.965	-0.129	1.06
DNAJB12	-6.95	12	-1.35	0.088	990	0.909	0.912	17067	0.965	-0.231	1.06
RAD21L1	-6.94	12	-1.35	0.0881	991	0.909	0.912	17066	0.965	-0.249	1.06
OGFOD1	-6.94	12	-1.35	0.0881	992	0.909	0.912	17065	0.965	-0.157	1.06
C1orf228	-6.94	12	-1.35	0.0882	993	0.909	0.912	17064	0.965	-0.131	1.05
GLRX2	-6.94	12	-1.35	0.0882	994	0.909	0.912	17063	0.965	-0.053	1.05
EDAR	-6.94	12	-1.35	0.0882	995	0.909	0.912	17062	0.965	-0.184	1.05
NTN1	-6.94	12	-1.35	0.0883	996	0.909	0.912	17061	0.965	-0.26	1.05
SYT1	-6.93	12	-1.35	0.0885	997	0.909	0.912	17060	0.965	-0.177	1.05
MASP2	-6.92	12	-1.35	0.0887	998	0.909	0.911	17059	0.965	-0.254	1.05
CARM1	-6.92	12	-1.35	0.0888	999	0.909	0.911	17058	0.965	-0.08	1.05
FRMD5	-6.92	12	-1.35	0.0888	1000	0.909	0.911	17057	0.965	-0.334	1.05
CPS1	-6.92	12	-1.35	0.0889	1001	0.909	0.911	17056	0.965	-0.106	1.05
TNKS2	-6.92	12	-1.35	0.0889	1002	0.909	0.911	17055	0.965	-0.187	1.05
CEACAM7	-6.92	12	-1.35	0.0889	1003	0.909	0.911	17054	0.965	0	1.05
NEURL	-6.91	12	-1.35	0.0891	1004	0.909	0.911	17053	0.965	-0.268	1.05
COMP	-6.91	12	-1.35	0.0892	1005	0.909	0.911	17052	0.964	-0.138	1.05
KCNIP4	-6.91	12	-1.35	0.0893	1006	0.909	0.911	17051	0.964	-0.106	1.05
FOXN1	-6.91	12	-1.35	0.0893	1007	0.909	0.911	17050	0.964	-0.259	1.05
GDPD5	-6.9	12	-1.35	0.0893	1008	0.909	0.911	17049	0.964	-0.433	1.05
PLA2G16	-6.9	12	-1.34	0.0895	1009	0.909	0.911	17048	0.964	-0.219	1.05
POPDC2	-6.9	12	-1.34	0.0895	1010	0.909	0.911	17047	0.964	-0.111	1.05
MAFA	-6.89	12	-1.34	0.0896	1011	0.909	0.91	17046	0.964	-0.202	1.05
GAS7	-6.89	12	-1.34	0.0897	1012	0.909	0.91	17045	0.964	-0.276	1.05
DCAF16	-6.89	12	-1.34	0.0897	1013	0.909	0.91	17044	0.964	-0.197	1.05
PHOSPHO1	-6.89	12	-1.34	0.0897	1014	0.909	0.91	17043	0.964	-0.145	1.05
APCS	-6.89	12	-1.34	0.0898	1015	0.909	0.91	17042	0.964	-0.221	1.05
ACBD6	-6.89	12	-1.34	0.0898	1016	0.909	0.91	17041	0.964	-0.132	1.05
RASSF4	-6.89	12	-1.34	0.0899	1017	0.909	0.91	17040	0.964	-0.225	1.05
LIN37	-6.89	12	-1.34	0.0899	1018	0.909	0.91	17039	0.964	-0.154	1.05
IPO7	-6.88	12	-1.34	0.0899	1019	0.909	0.91	17038	0.964	-0.452	1.05
N4BP2L1	-6.88	12	-1.34	0.0899	1020	0.909	0.91	17037	0.964	-0.085	1.05
GMPR2	-6.88	12	-1.34	0.09	1021	0.909	0.91	17036	0.964	-0.111	1.05
PRR14	-6.88	12	-1.34	0.09	1022	0.909	0.91	17035	0.964	-0.208	1.05
RTN4RL2	-6.88	12	-1.34	0.0901	1023	0.909	0.91	17034	0.964	-0.28	1.05
OR1K1	-6.88	12	-1.34	0.0901	1024	0.909	0.91	17033	0.964	-0.348	1.05
DEF6	-6.87	12	-1.34	0.0902	1025	0.909	0.91	17032	0.964	-0.153	1.04
CRNKL1	-6.87	12	-1.34	0.0903	1026	0.909	0.91	17031	0.964	-0.094	1.04
KDM1B	-6.87	12	-1.34	0.0904	1027	0.909	0.91	17030	0.964	-0.234	1.04
CALML5	-6.86	12	-1.34	0.0908	1028	0.909	0.909	17029	0.964	-0.125	1.04
IRS4	-6.85	12	-1.34	0.0908	1029	0.909	0.909	17028	0.964	-0.205	1.04
TLE1	-6.85	12	-1.34	0.0909	1030	0.909	0.909	17027	0.964	-0.194	1.04
PALMD	-6.85	12	-1.33	0.091	1031	0.909	0.909	17026	0.964	-0.158	1.04
OR6C4	-6.84	12	-1.33	0.0911	1032	0.909	0.909	17025	0.964	-0.226	1.04
OXT	-6.84	12	-1.33	0.0911	1033	0.909	0.909	17024	0.964	-0.231	1.04
CREBBP	-6.84	12	-1.33	0.0913	1034	0.909	0.909	17023	0.964	-0.264	1.04
ARHGEF10L	-6.84	12	-1.33	0.0913	1035	0.909	0.909	17022	0.964	-0.147	1.04
MAST4	-6.83	12	-1.33	0.0915	1036	0.909	0.908	17021	0.964	-0.185	1.04
LSMEM1	-6.83	12	-1.33	0.0916	1037	0.909	0.908	17020	0.964	-0.008	1.04
ELOVL7	-6.83	12	-1.33	0.0916	1038	0.909	0.908	17019	0.964	-0.154	1.04
IFT27	-6.83	12	-1.33	0.0916	1039	0.909	0.908	17018	0.964	-0.375	1.04
LGALS4	-6.82	12	-1.33	0.0918	1040	0.909	0.908	17017	0.964	-0.237	1.04
C19orf80	-6.82	12	-1.33	0.0918	1041	0.909	0.908	17016	0.964	-0.354	1.04
MTMR10	-6.82	12	-1.33	0.0919	1042	0.909	0.908	17015	0.964	-0.133	1.04
WDSUB1	-6.82	12	-1.33	0.092	1043	0.909	0.908	17014	0.964	-0.105	1.04
WWP1	-6.81	12	-1.33	0.0922	1044	0.909	0.908	17013	0.963	-0.218	1.04
TBL2	-6.8	12	-1.33	0.0924	1045	0.909	0.908	17012	0.963	-0.208	1.03
MOGAT3	-6.8	12	-1.33	0.0924	1046	0.909	0.908	17011	0.963	-0.242	1.03
C9orf92	-6.8	12	-1.33	0.0925	1047	0.909	0.908	17010	0.963	-0.072	1.03
FSHR	-6.8	12	-1.33	0.0925	1048	0.909	0.907	17009	0.963	-0.215	1.03
PICK1	-6.8	12	-1.33	0.0925	1049	0.909	0.907	17008	0.963	-0.156	1.03
TMEM150B	-6.8	12	-1.32	0.0926	1050	0.909	0.907	17007	0.963	-0.281	1.03
GAB4	-6.8	12	-1.32	0.0926	1051	0.909	0.907	17006	0.963	-0.262	1.03
CLDN15	-6.8	12	-1.32	0.0927	1052	0.909	0.907	17005	0.963	-0.058	1.03
MEPE	-6.79	12	-1.32	0.0927	1053	0.909	0.907	17004	0.963	-0.233	1.03
PEX11B	-6.79	12	-1.32	0.0927	1054	0.909	0.907	17003	0.963	-0.166	1.03
KLHDC8B	-6.79	12	-1.32	0.0928	1055	0.909	0.907	17002	0.963	-0.203	1.03
GAST	-6.79	12	-1.32	0.0928	1056	0.909	0.907	17001	0.963	-0.017	1.03
VSIG4	-6.79	12	-1.32	0.0928	1057	0.909	0.907	17000	0.963	-0.186	1.03
ITGAD	-6.79	12	-1.32	0.0928	1058	0.909	0.907	16999	0.963	-0.169	1.03
SEMA3D	-6.79	12	-1.32	0.0928	1059	0.909	0.907	16998	0.963	-0.222	1.03
ACTL6B	-6.79	12	-1.32	0.0929	1060	0.909	0.907	16997	0.963	-0.24	1.03
TMEM178A	-6.79	12	-1.32	0.0929	1061	0.909	0.907	16996	0.963	-0.251	1.03
HDAC1	-6.79	12	-1.32	0.0929	1062	0.909	0.907	16995	0.963	-0.281	1.03
CCDC80	-6.78	12	-1.32	0.0932	1063	0.909	0.907	16994	0.963	-0.152	1.03
RHD	-6.78	12	-1.32	0.0932	1064	0.909	0.907	16993	0.963	-0.035	1.03
RNF212	-6.78	12	-1.32	0.0932	1065	0.909	0.907	16992	0.963	-0.202	1.03
ATP12A	-6.78	12	-1.32	0.0932	1066	0.909	0.907	16991	0.963	-0.125	1.03
WDR16	-6.77	12	-1.32	0.0933	1067	0.909	0.907	16990	0.963	-0.088	1.03
PRR5	-6.77	12	-1.32	0.0933	1068	0.909	0.907	16989	0.963	-0.11	1.03
TICAM1	-6.77	12	-1.32	0.0936	1069	0.909	0.906	16988	0.963	-0.193	1.03
RSF1	-6.77	12	-1.32	0.0936	1070	0.909	0.906	16987	0.963	-0.092	1.03
PC	-6.76	12	-1.32	0.0936	1071	0.909	0.906	16986	0.963	-0.202	1.03
COL9A2	-6.76	12	-1.32	0.0938	1072	0.909	0.906	16985	0.963	-0.244	1.03
STX18	-6.76	12	-1.32	0.0938	1073	0.909	0.906	16984	0.963	-0.208	1.03
PDE3B	-6.76	12	-1.32	0.0938	1074	0.909	0.906	16983	0.963	-0.188	1.03
FOXN4	-6.75	12	-1.32	0.0941	1075	0.909	0.906	16982	0.963	-0.148	1.03
HIST1H2AG	-3.38	3	-1.32	0.0941	1076	0.909	0.906	16981	0.963	-0.365	1.03
CCDC30	-6.75	12	-1.32	0.0942	1077	0.909	0.906	16980	0.963	-0.201	1.03
KRTAP1-4	-6.75	12	-1.32	0.0942	1078	0.909	0.906	16979	0.963	-0.327	1.03
MYO7A	-6.74	12	-1.31	0.0943	1079	0.909	0.906	16978	0.963	-0.157	1.03
PRDM15	-6.73	12	-1.31	0.0946	1080	0.909	0.905	16977	0.963	-0.087	1.02
RGS16	-6.73	12	-1.31	0.0947	1081	0.909	0.905	16976	0.963	-0.144	1.02
EXOC3L2	-6.73	12	-1.31	0.0947	1082	0.909	0.905	16975	0.963	-0.079	1.02
TRPT1	-6.73	12	-1.31	0.0949	1083	0.909	0.905	16974	0.963	-0.163	1.02
PLCB4	-6.72	12	-1.31	0.0949	1084	0.909	0.905	16973	0.963	-0.124	1.02
PTPN3	-6.72	12	-1.31	0.095	1085	0.909	0.905	16972	0.963	-0.239	1.02
KRT32	-6.72	12	-1.31	0.095	1086	0.909	0.905	16971	0.963	-0.394	1.02
BHLHB9	-6.72	12	-1.31	0.0951	1087	0.909	0.905	16970	0.963	0.246	1.02
WNT4	-6.72	12	-1.31	0.0951	1088	0.909	0.905	16969	0.963	-0.09	1.02
XKR6	-6.72	12	-1.31	0.0952	1089	0.909	0.905	16968	0.963	-0.242	1.02
UBE2A	-6.72	12	-1.31	0.0952	1090	0.909	0.905	16967	0.963	-0.144	1.02
LGALS9B	-3.36	3	-1.31	0.0952	1091	0.909	0.905	16966	0.963	-0.357	1.02
LRRC18	-6.71	12	-1.31	0.0952	1092	0.909	0.905	16965	0.963	-0.172	1.02
RAG1	-6.71	12	-1.31	0.0954	1093	0.909	0.905	16964	0.963	-0.21	1.02
UBXN2B	-6.7	12	-1.31	0.0956	1094	0.909	0.904	16963	0.963	-0.353	1.02
SEP15	-6.7	12	-1.31	0.0956	1095	0.909	0.904	16962	0.963	-0.36	1.02
SIVA1	-6.7	12	-1.31	0.0956	1096	0.909	0.904	16961	0.963	-0.212	1.02
C16orf70	-6.7	12	-1.31	0.0956	1097	0.909	0.904	16960	0.963	-0.188	1.02
LXN	-6.7	12	-1.31	0.0957	1098	0.909	0.904	16959	0.963	-0.22	1.02
IGSF8	-6.7	12	-1.31	0.0957	1099	0.909	0.904	16958	0.963	-0.273	1.02
FOXB1	-6.7	12	-1.31	0.0958	1100	0.909	0.904	16957	0.963	-0.147	1.02
RS1	-6.7	12	-1.31	0.0958	1101	0.909	0.904	16956	0.963	-0.189	1.02
AAK1	-6.7	12	-1.31	0.0958	1102	0.909	0.904	16955	0.963	-0.167	1.02
MASP1	-6.7	12	-1.31	0.0959	1103	0.909	0.904	16954	0.963	-0.216	1.02
PLCL1	-6.69	12	-1.31	0.0959	1104	0.909	0.904	16953	0.963	-0.096	1.02
WNT2	-6.69	12	-1.3	0.096	1105	0.909	0.904	16952	0.963	-0.209	1.02
ARL13A	-6.69	12	-1.3	0.0962	1106	0.909	0.904	16951	0.963	-0.195	1.02
CRTC2	-6.68	12	-1.3	0.0962	1107	0.909	0.904	16950	0.963	-0.217	1.02
PROKR1	-6.68	12	-1.3	0.0962	1108	0.909	0.904	16949	0.963	0.05	1.02
PODNL1	-6.68	12	-1.3	0.0964	1109	0.909	0.904	16948	0.963	-0.145	1.02
FBLN2	-6.68	12	-1.3	0.0964	1110	0.909	0.904	16947	0.963	-0.119	1.02
GPIHBP1	-6.68	12	-1.3	0.0964	1111	0.909	0.904	16946	0.963	-0.056	1.02
SDR16C5	-6.67	12	-1.3	0.0966	1112	0.909	0.903	16945	0.963	-0.07	1.02
FILIP1L	-6.67	12	-1.3	0.0966	1113	0.909	0.903	16944	0.963	-0.127	1.02
ILF3	-6.67	12	-1.3	0.0966	1114	0.909	0.903	16943	0.963	-0.251	1.02
CACNG2	-6.67	12	-1.3	0.0966	1115	0.909	0.903	16942	0.963	-0.162	1.02
ZNF784	-6.67	12	-1.3	0.0968	1116	0.909	0.903	16941	0.963	-0.101	1.01
CTSW	-6.67	12	-1.3	0.0968	1117	0.909	0.903	16940	0.963	-0.14	1.01
SAC3D1	-6.66	12	-1.3	0.097	1118	0.909	0.903	16939	0.963	-0.106	1.01
SPATA6	-6.66	12	-1.3	0.097	1119	0.909	0.903	16938	0.963	-0.182	1.01
LONP2	-6.66	12	-1.3	0.0971	1120	0.909	0.903	16937	0.963	-0.215	1.01
HNF1A	-6.65	12	-1.3	0.0972	1121	0.909	0.903	16936	0.963	-0.189	1.01
FAM129A	-6.65	12	-1.3	0.0973	1122	0.909	0.903	16935	0.962	-0.133	1.01
MS4A12	-6.65	12	-1.3	0.0973	1123	0.909	0.903	16934	0.962	-0.153	1.01
SPATA9	-6.65	12	-1.3	0.0973	1124	0.909	0.903	16933	0.962	-0.252	1.01
FRA10AC1	-6.65	12	-1.3	0.0974	1125	0.909	0.903	16932	0.962	-0.231	1.01
TMCO4	-6.65	12	-1.3	0.0975	1126	0.909	0.903	16931	0.962	-0.12	1.01
DNMT3L	-6.64	12	-1.3	0.0976	1127	0.909	0.902	16930	0.962	-0.227	1.01
CCNT1	-6.64	12	-1.3	0.0976	1128	0.909	0.902	16929	0.962	-0.215	1.01
SLC28A1	-6.64	12	-1.29	0.0978	1129	0.909	0.902	16928	0.962	-0.217	1.01
CAP2	-6.64	12	-1.29	0.0978	1130	0.909	0.902	16927	0.962	-0.135	1.01
OSTF1	-6.63	12	-1.29	0.0978	1131	0.909	0.902	16926	0.962	-0.179	1.01
UCP3	-6.63	12	-1.29	0.0979	1132	0.909	0.902	16925	0.962	-0.199	1.01
MEIS2	-6.63	12	-1.29	0.098	1133	0.909	0.902	16924	0.962	-0.101	1.01
WAS	-6.62	12	-1.29	0.0982	1134	0.909	0.902	16923	0.962	-0.108	1.01
NASP	-6.62	12	-1.29	0.0984	1135	0.909	0.902	16922	0.962	-0.324	1.01
TMOD2	-6.62	12	-1.29	0.0984	1136	0.909	0.902	16921	0.962	-0.198	1.01
RERE	-6.62	12	-1.29	0.0985	1137	0.909	0.902	16920	0.962	-0.097	1.01
CCR9	-6.62	12	-1.29	0.0985	1138	0.909	0.902	16919	0.962	0.018	1.01
GTF2I	-6.61	12	-1.29	0.0985	1139	0.909	0.902	16918	0.962	-0.249	1.01
KRT13	-6.61	12	-1.29	0.0985	1140	0.909	0.902	16917	0.962	-0.149	1.01
MPC1	-6.61	12	-1.29	0.0985	1141	0.909	0.901	16916	0.962	-0.124	1.01
DONSON	-6.61	12	-1.29	0.0985	1142	0.909	0.901	16915	0.962	-0.232	1.01
JAGN1	-6.61	12	-1.29	0.0986	1143	0.909	0.901	16914	0.962	-0.134	1.01
PNPLA1	-6.61	12	-1.29	0.0986	1144	0.909	0.901	16913	0.962	-0.112	1.01
LRFN4	-6.61	12	-1.29	0.0986	1145	0.909	0.901	16912	0.962	-0.134	1.01
CAMP	-6.61	12	-1.29	0.0987	1146	0.909	0.901	16911	0.962	-0.182	1.01
DIRAS3	-6.61	12	-1.29	0.0987	1147	0.909	0.901	16910	0.962	-0.295	1.01
ADAMTS20	-6.61	12	-1.29	0.0987	1148	0.909	0.901	16909	0.962	-0.004	1.01
SLC16A4	-6.61	12	-1.29	0.0987	1149	0.909	0.901	16908	0.962	-0.262	1.01
DHX15	-6.61	12	-1.29	0.0988	1150	0.909	0.901	16907	0.962	-0.646	1.01
ARAF	-6.6	12	-1.29	0.0988	1151	0.909	0.901	16906	0.962	-0.162	1.01
CNKSR2	-6.6	12	-1.29	0.0989	1152	0.909	0.901	16905	0.962	-0.124	1
PALLD	-6.6	12	-1.29	0.0989	1153	0.909	0.901	16904	0.962	-0.154	1
CCDC167	-6.6	12	-1.29	0.0989	1154	0.909	0.901	16903	0.962	-0.145	1
PPP2R2A	-6.6	12	-1.29	0.099	1155	0.909	0.901	16902	0.962	-0.216	1
ZNF544	-6.6	12	-1.29	0.0991	1156	0.909	0.901	16901	0.962	-0.213	1
OR6V1	-6.59	12	-1.29	0.0991	1157	0.909	0.901	16900	0.962	-0.27	1
TWF2	-6.59	12	-1.29	0.0992	1158	0.909	0.901	16899	0.962	-0.223	1
PDHB	-6.59	12	-1.29	0.0993	1159	0.909	0.901	16898	0.962	-0.069	1
CTPS2	-6.59	12	-1.29	0.0994	1160	0.909	0.901	16897	0.962	-0.215	1
TNFRSF6B	-6.59	12	-1.29	0.0994	1161	0.909	0.901	16896	0.962	0.007	1
ASTN2	-6.59	12	-1.28	0.0994	1162	0.909	0.901	16895	0.962	-0.059	1
STK40	-6.58	12	-1.28	0.0995	1163	0.909	0.9	16894	0.962	-0.305	1
MYL7	-6.58	12	-1.28	0.0996	1164	0.909	0.9	16893	0.962	-0.102	1
THEM4	-6.58	12	-1.28	0.0997	1165	0.909	0.9	16892	0.962	-0.156	1
TNR	-6.58	12	-1.28	0.0997	1166	0.909	0.9	16891	0.962	-0.33	1
C1orf94	-6.58	12	-1.28	0.0997	1167	0.909	0.9	16890	0.962	-0.208	1
TREML4	-6.57	12	-1.28	0.0998	1168	0.909	0.9	16889	0.962	-0.215	1
TYRO3	-6.57	12	-1.28	0.1	1169	0.909	0.9	16888	0.962	-0.211	1
EGFR	-6.57	12	-1.28	0.1	1170	0.909	0.9	16887	0.962	-0.291	1
METTL10	-6.57	12	-1.28	0.1	1171	0.909	0.9	16886	0.962	-0.107	1
ARHGAP28	-6.56	12	-1.28	0.1	1172	0.909	0.9	16885	0.962	-0.169	1
RHOG	-6.56	12	-1.28	0.1	1173	0.909	0.9	16884	0.962	-0.273	1
RSRC2	-6.56	12	-1.28	0.1	1174	0.909	0.9	16883	0.962	-0.129	1
C9orf152	-6.56	12	-1.28	0.1	1175	0.909	0.9	16882	0.962	-0.276	1
FLOT2	-6.56	12	-1.28	0.1	1176	0.909	0.9	16881	0.962	-0.291	1
ANO1	-6.56	12	-1.28	0.1	1177	0.909	0.9	16880	0.962	-0.125	1
PHGR1	-6.56	12	-1.28	0.1	1178	0.909	0.9	16879	0.962	-0.182	1
ATG3	-6.56	12	-1.28	0.1	1179	0.909	0.9	16878	0.962	-0.215	1
LMBR1	-6.55	12	-1.28	0.1	1180	0.909	0.9	16877	0.962	-0.237	1
CDH22	-6.55	12	-1.28	0.101	1181	0.909	0.899	16876	0.962	-0.145	1
C12orf45	-6.55	12	-1.28	0.101	1182	0.909	0.899	16875	0.962	-0.133	1
C12orf68	-6.55	12	-1.28	0.101	1183	0.909	0.899	16874	0.962	-0.249	1
C11orf94	-6.55	12	-1.28	0.101	1184	0.909	0.899	16873	0.962	-0.098	1
ANGPT4	-6.55	12	-1.28	0.101	1185	0.909	0.899	16872	0.962	-0.196	1
AOC1	-6.54	12	-1.28	0.101	1186	0.909	0.899	16871	0.962	-0.164	1
OR4C6	-6.54	12	-1.28	0.101	1187	0.909	0.899	16870	0.962	0.028	1
ZNF689	-6.54	12	-1.28	0.101	1188	0.909	0.899	16869	0.962	-0.107	1
NCR3	-6.54	12	-1.28	0.101	1189	0.909	0.899	16868	0.962	-0.185	1
GRM4	-6.53	12	-1.27	0.101	1190	0.909	0.899	16867	0.962	-0.225	1
ZMIZ2	-6.53	12	-1.27	0.101	1191	0.909	0.899	16866	0.962	-0.202	1
SMAD7	-6.53	12	-1.27	0.101	1192	0.909	0.899	16865	0.962	-0.211	1
ADAMTSL3	-6.53	12	-1.27	0.101	1193	0.909	0.899	16864	0.962	-0.053	1
SAV1	-6.53	12	-1.27	0.101	1194	0.909	0.899	16863	0.962	-0.298	1
HIST1H1B	-6.53	12	-1.27	0.101	1195	0.909	0.899	16862	0.962	0.005	1
ZC3H4	-6.53	12	-1.27	0.101	1196	0.909	0.899	16861	0.962	-0.097	1
SPTLC3	-6.52	12	-1.27	0.102	1197	0.909	0.898	16860	0.962	-0.203	0.99
LRWD1	-6.52	12	-1.27	0.102	1198	0.909	0.898	16859	0.962	-0.169	0.99
GABBR2	-6.52	12	-1.27	0.102	1199	0.909	0.898	16858	0.962	-0.298	0.99
MAN2C1	-6.52	12	-1.27	0.102	1200	0.909	0.898	16857	0.962	-0.216	0.99
UCHL3	-6.51	12	-1.27	0.102	1201	0.909	0.898	16856	0.962	-0.301	0.99
ATG14	-6.51	12	-1.27	0.102	1202	0.909	0.898	16855	0.962	-0.128	0.99
CA10	-6.51	12	-1.27	0.102	1203	0.909	0.898	16854	0.962	-0.205	0.99
FAM189A2	-6.51	12	-1.27	0.102	1204	0.909	0.898	16853	0.962	-0.095	0.99
HEXA	-6.51	12	-1.27	0.102	1205	0.909	0.898	16852	0.962	-0.032	0.99
ASZ1	-6.51	12	-1.27	0.102	1206	0.909	0.898	16851	0.962	-0.212	0.99
TMEM65	-6.51	12	-1.27	0.102	1207	0.909	0.898	16850	0.962	-0.189	0.99
KRBA1	-6.51	12	-1.27	0.102	1208	0.909	0.898	16849	0.962	-0.169	0.99
RPRD1B	-6.51	12	-1.27	0.102	1209	0.909	0.898	16848	0.962	-0.14	0.99
CHMP4C	-6.5	12	-1.27	0.102	1210	0.909	0.898	16847	0.962	-0.179	0.99
PNLIPRP3	-6.5	12	-1.27	0.102	1211	0.909	0.898	16846	0.962	-0.249	0.99
OLFML3	-6.5	12	-1.27	0.102	1212	0.909	0.898	16845	0.962	-0.334	0.99
TMEM54	-6.5	12	-1.27	0.102	1213	0.909	0.898	16844	0.962	-0.196	0.99
OR2K2	-6.49	12	-1.27	0.103	1214	0.909	0.897	16843	0.962	-0.045	0.99
SUCLA2	-6.49	12	-1.27	0.103	1215	0.909	0.897	16842	0.962	-0.096	0.99
TDRD10	-6.49	12	-1.27	0.103	1216	0.909	0.897	16841	0.962	-0.095	0.99
IQGAP1	-6.49	12	-1.27	0.103	1217	0.909	0.897	16840	0.962	-0.291	0.99
COL21A1	-6.48	12	-1.27	0.103	1218	0.909	0.897	16839	0.962	-0.147	0.99
NRROS	-6.48	12	-1.27	0.103	1219	0.909	0.897	16838	0.962	-0.077	0.99
SCTR	-6.48	12	-1.26	0.103	1220	0.909	0.897	16837	0.962	-0.243	0.99
LRRFIP2	-6.48	12	-1.26	0.103	1221	0.909	0.897	16836	0.962	-0.127	0.99
FTH1	-3.24	3	-1.26	0.103	1222	0.909	0.897	16835	0.962	-0.327	0.99
LOXL2	-6.48	12	-1.26	0.103	1223	0.909	0.897	16834	0.962	-0.143	0.99
EDDM3B	-5.61	9	-1.26	0.103	1224	0.909	0.897	16833	0.962	-0.371	0.99
AEBP2	-6.48	12	-1.26	0.103	1225	0.909	0.897	16832	0.962	-0.147	0.99
OR2W3	-6.47	12	-1.26	0.103	1226	0.909	0.897	16831	0.962	-0.229	0.99
TRIB2	-6.47	12	-1.26	0.103	1227	0.909	0.897	16830	0.962	-0.063	0.99
LDHC	-6.47	12	-1.26	0.103	1228	0.909	0.897	16829	0.962	-0.16	0.99
WDFY1	-6.47	12	-1.26	0.103	1229	0.909	0.897	16828	0.962	-0.157	0.99
FAM124A	-6.47	12	-1.26	0.103	1230	0.909	0.897	16827	0.962	-0.157	0.99
STYXL1	-6.47	12	-1.26	0.103	1231	0.909	0.897	16826	0.962	-0.095	0.99
CHSY1	-6.47	12	-1.26	0.103	1232	0.909	0.897	16825	0.962	-0.11	0.99
FGF21	-6.47	12	-1.26	0.103	1233	0.909	0.897	16824	0.962	-0.15	0.99
IL7R	-6.46	12	-1.26	0.104	1234	0.909	0.896	16823	0.962	-0.14	0.98
AMER2	-6.46	12	-1.26	0.104	1235	0.909	0.896	16822	0.962	-0.284	0.98
RALGAPA2	-6.46	12	-1.26	0.104	1236	0.909	0.896	16821	0.962	-0.114	0.98
WDFY2	-6.46	12	-1.26	0.104	1237	0.909	0.896	16820	0.962	-0.264	0.98
PPFIA1	-6.45	12	-1.26	0.104	1238	0.909	0.896	16819	0.962	-0.085	0.98
SIN3B	-6.45	12	-1.26	0.104	1239	0.909	0.896	16818	0.962	-0.052	0.98
FUT1	-6.45	12	-1.26	0.104	1240	0.909	0.896	16817	0.962	-0.215	0.98
TET2	-6.45	12	-1.26	0.104	1241	0.909	0.896	16816	0.962	-0.027	0.98
MLXIPL	-6.44	12	-1.26	0.104	1242	0.909	0.896	16815	0.962	-0.25	0.98
CCBL2	-6.44	12	-1.26	0.104	1243	0.909	0.896	16814	0.962	-0.106	0.98
TMEM176B	-6.44	12	-1.26	0.104	1244	0.909	0.896	16813	0.962	-0.199	0.98
HES5	-6.43	12	-1.26	0.105	1245	0.909	0.895	16812	0.962	-0.118	0.98
CD83	-6.43	12	-1.25	0.105	1246	0.909	0.895	16811	0.962	-0.135	0.98
RBPMS2	-6.43	12	-1.25	0.105	1247	0.909	0.895	16810	0.962	-0.295	0.98
TTC22	-6.42	12	-1.25	0.105	1248	0.909	0.895	16809	0.961	-0.137	0.98
HFM1	-6.42	12	-1.25	0.105	1249	0.909	0.895	16808	0.961	-0.159	0.98
C6orf100	-6.42	12	-1.25	0.105	1250	0.909	0.895	16807	0.961	0.062	0.98
ARIH2	-6.42	12	-1.25	0.105	1251	0.909	0.895	16806	0.961	-0.173	0.98
PTPLAD1	-6.42	12	-1.25	0.105	1252	0.909	0.895	16805	0.961	-0.133	0.98
SOST	-6.41	12	-1.25	0.105	1253	0.909	0.895	16804	0.961	-0.301	0.98
HAS1	-6.41	12	-1.25	0.105	1254	0.909	0.895	16803	0.961	-0.051	0.98
C1orf110	-6.41	12	-1.25	0.105	1255	0.909	0.895	16802	0.961	-0.069	0.98
CXCL1	-5.55	9	-1.25	0.105	1256	0.909	0.895	16801	0.961	-0.142	0.98
PPT1	-6.41	12	-1.25	0.105	1257	0.909	0.895	16800	0.961	-0.018	0.98
GNMT	-6.41	12	-1.25	0.105	1258	0.909	0.895	16799	0.961	0.049	0.98
CYorf17	-6.4	12	-1.25	0.106	1259	0.909	0.894	16798	0.961	-0.142	0.97
ANXA10	-6.4	12	-1.25	0.106	1260	0.909	0.894	16797	0.961	-0.103	0.97
EIF4EBP1	-6.4	12	-1.25	0.106	1261	0.909	0.894	16796	0.961	0.026	0.97
IFI27L2	-6.39	12	-1.25	0.106	1262	0.909	0.894	16795	0.961	-0.22	0.97
TCTEX1D1	-6.39	12	-1.25	0.106	1263	0.909	0.894	16794	0.961	-0.154	0.97
BCDIN3D	-6.39	12	-1.25	0.106	1264	0.909	0.894	16793	0.961	-0.493	0.97
PBX4	-6.38	12	-1.25	0.107	1265	0.909	0.893	16792	0.961	-0.103	0.97
ILKAP	-6.38	12	-1.24	0.107	1266	0.909	0.893	16791	0.961	-0.182	0.97
GTSF1L	-6.37	12	-1.24	0.107	1267	0.909	0.893	16790	0.961	-0.092	0.97
TM7SF2	-6.37	12	-1.24	0.107	1268	0.909	0.893	16789	0.961	-0.049	0.97
CARTPT	-6.37	12	-1.24	0.107	1269	0.909	0.893	16788	0.961	-0.165	0.97
HABP2	-6.37	12	-1.24	0.107	1270	0.909	0.893	16787	0.961	-0.281	0.97
LYRM9	-6.37	12	-1.24	0.107	1271	0.909	0.893	16786	0.961	-0.148	0.97
ZNF333	-6.36	12	-1.24	0.107	1272	0.909	0.893	16785	0.961	-0.2	0.97
PSMB5	-6.36	12	-1.24	0.107	1273	0.909	0.893	16784	0.96	-0.086	0.97
KSR1	-6.35	12	-1.24	0.107	1274	0.909	0.893	16783	0.96	-0.306	0.97
RHOU	-6.35	12	-1.24	0.107	1275	0.909	0.893	16782	0.96	-0.129	0.97
MKRN3	-6.35	12	-1.24	0.107	1276	0.909	0.893	16781	0.96	-0.211	0.97
GDPD4	-6.35	12	-1.24	0.107	1277	0.909	0.893	16780	0.96	-0.164	0.97
CUBN	-6.34	12	-1.24	0.108	1278	0.909	0.892	16779	0.96	-0.062	0.97
ATAT1	-6.34	12	-1.24	0.108	1279	0.909	0.892	16778	0.96	-0.199	0.97
ABI1	-6.34	12	-1.24	0.108	1280	0.909	0.892	16777	0.96	-0.061	0.97
GSTA5	-5.48	9	-1.24	0.108	1281	0.909	0.892	16776	0.96	-0.513	0.97
STPG1	-6.33	12	-1.24	0.108	1282	0.909	0.892	16775	0.96	-0.301	0.97
TCF19	-6.33	12	-1.24	0.108	1283	0.909	0.892	16774	0.96	-0.244	0.97
CCDC53	-6.33	12	-1.24	0.108	1284	0.909	0.892	16773	0.96	-0.328	0.97
LMTK2	-6.33	12	-1.24	0.108	1285	0.909	0.892	16772	0.96	-0.2	0.97
MSH2	-6.33	12	-1.24	0.108	1286	0.909	0.892	16771	0.96	-0.227	0.97
IKZF4	-6.33	12	-1.24	0.108	1287	0.909	0.892	16770	0.96	-0.296	0.97
CERS6	-6.32	12	-1.23	0.108	1288	0.909	0.892	16769	0.96	-0.196	0.97
PIK3CD	-6.32	12	-1.23	0.108	1289	0.909	0.892	16768	0.96	-0.042	0.97
N4BP1	-6.32	12	-1.23	0.108	1290	0.909	0.892	16767	0.96	-0.232	0.97
ECHDC2	-6.32	12	-1.23	0.109	1291	0.909	0.891	16766	0.96	-0.033	0.96
FAM115A	-6.32	12	-1.23	0.109	1292	0.909	0.891	16765	0.96	-0.207	0.96
LPCAT1	-6.32	12	-1.23	0.109	1293	0.909	0.891	16764	0.96	-0.101	0.96
VAPA	-5.47	9	-1.23	0.109	1294	0.909	0.891	16763	0.96	-0.233	0.96
C17orf72	-6.31	12	-1.23	0.109	1295	0.909	0.891	16762	0.96	-0.175	0.96
ADAM15	-6.31	12	-1.23	0.109	1296	0.909	0.891	16761	0.96	-0.164	0.96
CDX2	-6.31	12	-1.23	0.109	1297	0.909	0.891	16760	0.96	-0.149	0.96
CACNA1B	-6.31	12	-1.23	0.109	1298	0.909	0.891	16759	0.96	-0.21	0.96
C1QA	-6.31	12	-1.23	0.109	1299	0.909	0.891	16758	0.96	-0.282	0.96
OR5A1	-6.31	12	-1.23	0.109	1300	0.909	0.891	16757	0.96	-0.235	0.96
PIK3R1	-6.31	12	-1.23	0.109	1301	0.909	0.891	16756	0.96	-0.148	0.96
TJP2	-6.31	12	-1.23	0.109	1302	0.909	0.891	16755	0.96	-0.053	0.96
ZMYM4	-6.3	12	-1.23	0.109	1303	0.909	0.891	16754	0.96	-0.209	0.96
COL4A5	-6.3	12	-1.23	0.109	1304	0.909	0.891	16753	0.96	-0.181	0.96
FREM2	-6.3	12	-1.23	0.109	1305	0.909	0.891	16752	0.96	-0.102	0.96
OR10AD1	-6.3	12	-1.23	0.109	1306	0.909	0.891	16751	0.96	-0.102	0.96
METRNL	-6.3	12	-1.23	0.109	1307	0.909	0.891	16750	0.96	-0.167	0.96
THSD4	-6.29	12	-1.23	0.109	1308	0.909	0.891	16749	0.96	-0.024	0.96
E2F2	-6.28	12	-1.23	0.11	1309	0.909	0.89	16748	0.96	-0.131	0.96
PLEKHF2	-6.28	12	-1.23	0.11	1310	0.909	0.89	16747	0.96	-0.218	0.96
SPESP1	-6.27	12	-1.22	0.11	1311	0.909	0.89	16746	0.959	-0.147	0.96
GJC2	-6.27	12	-1.22	0.11	1312	0.909	0.89	16745	0.959	-0.145	0.96
C1orf106	-6.27	12	-1.22	0.11	1313	0.909	0.89	16744	0.959	-0.181	0.96
RMDN3	-6.27	12	-1.22	0.11	1314	0.909	0.89	16743	0.959	-0.097	0.96
OR4S1	-6.27	12	-1.22	0.11	1315	0.909	0.89	16742	0.959	-0.102	0.96
MANF	-6.26	12	-1.22	0.111	1316	0.909	0.889	16741	0.959	-0.099	0.95
PPME1	-6.26	12	-1.22	0.111	1317	0.909	0.889	16740	0.959	-0.204	0.95
HSPB1	-6.26	12	-1.22	0.111	1318	0.909	0.889	16739	0.959	-0.17	0.95
MTMR14	-6.26	12	-1.22	0.111	1319	0.909	0.889	16738	0.959	-0.024	0.95
LAPTM5	-6.26	12	-1.22	0.111	1320	0.909	0.889	16737	0.959	-0.098	0.95
GNB2	-6.26	12	-1.22	0.111	1321	0.909	0.889	16736	0.959	-0.295	0.95
NAALADL1	-6.25	12	-1.22	0.111	1322	0.909	0.889	16735	0.959	-0.026	0.95
BBIP1	-6.24	12	-1.22	0.111	1323	0.909	0.889	16734	0.959	-0.241	0.95
RC3H1	-6.24	12	-1.22	0.111	1324	0.909	0.889	16733	0.959	-0.15	0.95
GPALPP1	-6.24	12	-1.22	0.111	1325	0.909	0.889	16732	0.959	-0.348	0.95
TERF2	-6.24	12	-1.22	0.111	1326	0.909	0.889	16731	0.959	-0.333	0.95
MAGI2	-6.24	12	-1.22	0.111	1327	0.909	0.889	16730	0.959	-0.061	0.95
C1orf65	-6.24	12	-1.22	0.111	1328	0.909	0.889	16729	0.959	-0.199	0.95
FAM185A	-6.24	12	-1.22	0.112	1329	0.909	0.888	16728	0.959	-0.014	0.95
ELMO2	-6.23	12	-1.22	0.112	1330	0.909	0.888	16727	0.959	-0.502	0.95
CD2	-6.23	12	-1.22	0.112	1331	0.909	0.888	16726	0.959	-0.315	0.95
MPP3	-6.23	12	-1.22	0.112	1332	0.909	0.888	16725	0.959	-0.106	0.95
PGLYRP2	-6.22	12	-1.22	0.112	1333	0.909	0.888	16724	0.959	-0.165	0.95
TAS2R60	-6.22	12	-1.22	0.112	1334	0.909	0.888	16723	0.959	-0.095	0.95
TRPV5	-6.22	12	-1.22	0.112	1335	0.909	0.888	16722	0.959	-0.038	0.95
FOXL2	-6.22	12	-1.22	0.112	1336	0.909	0.888	16721	0.959	-0.168	0.95
GCM2	-6.22	12	-1.21	0.112	1337	0.909	0.888	16720	0.959	-0.205	0.95
ITPRIPL1	-6.21	12	-1.21	0.112	1338	0.909	0.888	16719	0.959	-0.279	0.95
LRRC48	-6.21	12	-1.21	0.112	1339	0.909	0.888	16718	0.959	-0.159	0.95
STX6	-6.21	12	-1.21	0.112	1340	0.909	0.888	16717	0.959	-0.241	0.95
GPR113	-6.21	12	-1.21	0.112	1341	0.909	0.888	16716	0.959	-0.264	0.95
MROH6	-6.21	12	-1.21	0.113	1342	0.909	0.887	16715	0.959	-0.275	0.95
SLC22A23	-6.21	12	-1.21	0.113	1343	0.909	0.887	16714	0.959	-0.056	0.95
OR14A16	-6.2	12	-1.21	0.113	1344	0.909	0.887	16713	0.959	-0.083	0.95
PTGER3	-6.2	12	-1.21	0.113	1345	0.909	0.887	16712	0.958	-0.06	0.95
MRPS36	-3.1	3	-1.21	0.113	1346	0.909	0.887	16711	0.958	-0.308	0.95
MUTYH	-6.2	12	-1.21	0.113	1347	0.909	0.887	16710	0.958	-0.266	0.95
A4GNT	-6.19	12	-1.21	0.113	1348	0.909	0.887	16709	0.958	-0.251	0.95
TAS2R16	-6.19	12	-1.21	0.113	1349	0.909	0.887	16708	0.958	-0.096	0.95
UNC93A	-6.19	12	-1.21	0.113	1350	0.909	0.887	16707	0.958	-0.176	0.95
CLNK	-6.19	12	-1.21	0.113	1351	0.909	0.887	16706	0.958	-0.117	0.95
STAC3	-6.19	12	-1.21	0.113	1352	0.909	0.887	16705	0.958	0.044	0.95
ZFYVE9	-6.18	12	-1.21	0.113	1353	0.909	0.887	16704	0.958	-0.269	0.95
TRIM56	-6.18	12	-1.21	0.113	1354	0.909	0.887	16703	0.958	-0.141	0.95
AKT1S1	-6.18	12	-1.21	0.114	1355	0.909	0.886	16702	0.958	-0.209	0.94
BSX	-6.18	12	-1.21	0.114	1356	0.909	0.886	16701	0.958	-0.134	0.94
ANKRD29	-6.18	12	-1.21	0.114	1357	0.909	0.886	16700	0.958	-0.031	0.94
NADSYN1	-6.18	12	-1.21	0.114	1358	0.909	0.886	16699	0.958	-0.299	0.94
CDC6	-6.18	12	-1.21	0.114	1359	0.909	0.886	16698	0.958	-0.365	0.94
ROS1	-6.18	12	-1.21	0.114	1360	0.909	0.886	16697	0.958	-0.141	0.94
FYB	-6.18	12	-1.21	0.114	1361	0.909	0.886	16696	0.958	-0.124	0.94
ATCAY	-6.17	12	-1.21	0.114	1362	0.909	0.886	16695	0.958	-0.277	0.94
AKR1A1	-6.17	12	-1.21	0.114	1363	0.909	0.886	16694	0.958	-0.17	0.94
NUMBL	-6.16	12	-1.2	0.114	1364	0.909	0.886	16693	0.958	-0.147	0.94
PPM1D	-6.16	12	-1.2	0.114	1365	0.909	0.886	16692	0.958	-0.269	0.94
NID1	-6.16	12	-1.2	0.114	1366	0.909	0.886	16691	0.958	0.039	0.94
RP11-770J1.4	-6.16	12	-1.2	0.114	1367	0.909	0.886	16690	0.958	-0.056	0.94
HPCAL4	-6.16	12	-1.2	0.114	1368	0.909	0.886	16689	0.958	-0.217	0.94
FBN3	-6.15	12	-1.2	0.115	1369	0.909	0.885	16688	0.958	0.017	0.94
CD69	-6.15	12	-1.2	0.115	1370	0.909	0.885	16687	0.958	-0.191	0.94
ATP6V0D1	-6.15	12	-1.2	0.115	1371	0.909	0.885	16686	0.958	-0.178	0.94
PACRGL	-6.15	12	-1.2	0.115	1372	0.909	0.885	16685	0.958	-0.265	0.94
TDRKH	-6.15	12	-1.2	0.115	1373	0.909	0.885	16684	0.958	-0.278	0.94
BTBD16	-6.15	12	-1.2	0.115	1374	0.909	0.885	16683	0.958	-0.089	0.94
VAMP8	-6.15	12	-1.2	0.115	1375	0.909	0.885	16682	0.958	-0.093	0.94
KLF13	-6.15	12	-1.2	0.115	1376	0.909	0.885	16681	0.958	-0.128	0.94
DNAJC9	-6.14	12	-1.2	0.115	1377	0.909	0.885	16680	0.958	-0.4	0.94
TCF15	-6.14	12	-1.2	0.115	1378	0.909	0.885	16679	0.958	-0.132	0.94
RABEPK	-6.14	12	-1.2	0.115	1379	0.909	0.885	16678	0.958	-0.069	0.94
IQCF3	-6.14	12	-1.2	0.115	1380	0.909	0.885	16677	0.958	-0.327	0.94
ASIC1	-6.14	12	-1.2	0.115	1381	0.909	0.885	16676	0.958	-0.154	0.94
NTN5	-6.14	12	-1.2	0.115	1382	0.909	0.885	16675	0.958	-0.183	0.94
SLCO3A1	-6.14	12	-1.2	0.115	1383	0.909	0.885	16674	0.958	-0.04	0.94
SLC22A12	-6.13	12	-1.2	0.115	1384	0.909	0.885	16673	0.958	-0.028	0.94
PDHA1	-6.13	12	-1.2	0.115	1385	0.909	0.885	16672	0.958	-0.13	0.94
SNTN	-6.13	12	-1.2	0.115	1386	0.909	0.885	16671	0.958	-0.246	0.94
R3HDM1	-6.13	12	-1.2	0.116	1387	0.909	0.884	16670	0.958	-0.192	0.94
RD3L	-6.13	12	-1.2	0.116	1388	0.909	0.884	16669	0.958	-0.166	0.94
GCFC2	-6.12	12	-1.2	0.116	1389	0.909	0.884	16668	0.958	-0.199	0.94
GALNT8	-6.12	12	-1.2	0.116	1390	0.909	0.884	16667	0.958	-0.164	0.94
SKOR1	-6.12	12	-1.2	0.116	1391	0.909	0.884	16666	0.958	-0.165	0.94
CD1D	-6.12	12	-1.2	0.116	1392	0.909	0.884	16665	0.958	-0.221	0.94
APOL2	-6.12	12	-1.2	0.116	1393	0.909	0.884	16664	0.958	-0.326	0.94
MAGEB2	-6.12	12	-1.2	0.116	1394	0.909	0.884	16663	0.958	-0.156	0.94
PDYN	-6.11	12	-1.19	0.116	1395	0.909	0.884	16662	0.958	-0.314	0.94
DET1	-6.1	12	-1.19	0.116	1396	0.909	0.884	16661	0.958	-0.16	0.94
WISP1	-6.1	12	-1.19	0.117	1397	0.909	0.883	16660	0.958	0.041	0.93
CHCHD6	-6.1	12	-1.19	0.117	1398	0.909	0.883	16659	0.957	-0.173	0.93
HIST1H3H	-6.1	12	-1.19	0.117	1399	0.909	0.883	16658	0.957	-0.042	0.93
MX1	-6.1	12	-1.19	0.117	1400	0.909	0.883	16657	0.957	-0.212	0.93
ALDH3A1	-6.1	12	-1.19	0.117	1401	0.909	0.883	16656	0.957	-0.215	0.93
CSF3R	-6.09	12	-1.19	0.117	1402	0.909	0.883	16655	0.957	-0.261	0.93
NT5DC2	-6.09	12	-1.19	0.117	1403	0.909	0.883	16654	0.957	-0.063	0.93
RXFP3	-6.09	12	-1.19	0.117	1404	0.909	0.883	16653	0.957	-0.043	0.93
C15orf62	-6.09	12	-1.19	0.117	1405	0.909	0.883	16652	0.957	-0.267	0.93
AP3B2	-6.08	12	-1.19	0.117	1406	0.909	0.883	16651	0.957	-0.051	0.93
LRRC8C	-6.08	12	-1.19	0.117	1407	0.909	0.883	16650	0.957	-0.228	0.93
POLR3GL	-6.08	12	-1.19	0.117	1408	0.909	0.883	16649	0.957	-0.348	0.93
FGF4	-6.08	12	-1.19	0.117	1409	0.909	0.883	16648	0.957	-0.171	0.93
RGS12	-6.08	12	-1.19	0.117	1410	0.909	0.883	16647	0.957	-0.023	0.93
NUP35	-6.07	12	-1.19	0.118	1411	0.909	0.882	16646	0.957	-0.22	0.93
CXorf61	-6.07	12	-1.19	0.118	1412	0.909	0.882	16645	0.957	-0.26	0.93
FBP1	-6.07	12	-1.19	0.118	1413	0.909	0.882	16644	0.957	-0.207	0.93
NKAIN4	-6.07	12	-1.19	0.118	1414	0.909	0.882	16643	0.957	-0.056	0.93
TDRD5	-6.07	12	-1.19	0.118	1415	0.909	0.882	16642	0.957	-0.13	0.93
GPR157	-6.06	12	-1.19	0.118	1416	0.909	0.882	16641	0.957	-0.183	0.93
OR4X1	-6.06	12	-1.19	0.118	1417	0.909	0.882	16640	0.957	-0.285	0.93
ODF2L	-6.06	12	-1.19	0.118	1418	0.909	0.882	16639	0.957	-0.205	0.93
ARNTL	-6.06	12	-1.18	0.118	1419	0.909	0.882	16638	0.957	-0.163	0.93
SUN2	-6.06	12	-1.18	0.118	1420	0.909	0.882	16637	0.957	-0.211	0.93
MPEG1	-6.05	12	-1.18	0.118	1421	0.909	0.882	16636	0.957	-0.04	0.93
ZBTB7A	-6.05	12	-1.18	0.118	1422	0.909	0.882	16635	0.957	-0.095	0.93
DHODH	-6.05	12	-1.18	0.118	1423	0.909	0.882	16634	0.957	-0.132	0.93
DUS4L	-6.05	12	-1.18	0.118	1424	0.909	0.882	16633	0.957	-0.171	0.93
USP1	-6.05	12	-1.18	0.118	1425	0.909	0.882	16632	0.957	-0.246	0.93
STRA8	-6.05	12	-1.18	0.118	1426	0.909	0.882	16631	0.957	-0.094	0.93
IQCJ-SCHIP1	-6.05	12	-1.18	0.118	1427	0.909	0.882	16630	0.957	-0.1	0.93
DLGAP3	-6.05	12	-1.18	0.118	1428	0.909	0.882	16629	0.957	-0.107	0.93
OSM	-6.05	12	-1.18	0.119	1429	0.909	0.881	16628	0.957	-0.122	0.92
PDGFB	-6.04	12	-1.18	0.119	1430	0.909	0.881	16627	0.957	0.024	0.92
CCDC180	-6.04	12	-1.18	0.119	1431	0.909	0.881	16626	0.957	-0.045	0.92
DCTPP1	-6.04	12	-1.18	0.119	1432	0.909	0.881	16625	0.957	-0.129	0.92
CAMKMT	-6.03	12	-1.18	0.119	1433	0.909	0.881	16624	0.957	-0.075	0.92
OR1B1	-6.03	12	-1.18	0.119	1434	0.909	0.881	16623	0.957	-0.105	0.92
TUBB6	-6.03	12	-1.18	0.119	1435	0.909	0.881	16622	0.957	-0.171	0.92
SPTBN4	-6.03	12	-1.18	0.119	1436	0.909	0.881	16621	0.957	-0.021	0.92
ACP5	-6.03	12	-1.18	0.119	1437	0.909	0.881	16620	0.957	-0.252	0.92
MPZL3	-6.03	12	-1.18	0.119	1438	0.909	0.881	16619	0.957	-0.132	0.92
CEBPE	-6.03	12	-1.18	0.119	1439	0.909	0.881	16618	0.957	-0.139	0.92
SAMD12	-6.03	12	-1.18	0.119	1440	0.909	0.881	16617	0.957	-0.127	0.92
CABP5	-6.03	12	-1.18	0.119	1441	0.909	0.881	16616	0.957	-0.17	0.92
ATF6B	-6.02	12	-1.18	0.119	1442	0.909	0.881	16615	0.957	-0.242	0.92
TRPC6	-6.02	12	-1.18	0.12	1443	0.909	0.88	16614	0.957	-0.189	0.92
FCRL4	-6.01	12	-1.17	0.12	1444	0.909	0.88	16613	0.956	-0.163	0.92
SLMO1	-6	12	-1.17	0.12	1445	0.909	0.88	16612	0.956	-0.176	0.92
DENND2D	-6	12	-1.17	0.12	1446	0.909	0.88	16611	0.956	-0.123	0.92
TMEM45A	-6	12	-1.17	0.12	1447	0.909	0.88	16610	0.956	-0.148	0.92
ASIP	-6	12	-1.17	0.12	1448	0.909	0.88	16609	0.956	-0.119	0.92
PTCHD1	-6	12	-1.17	0.12	1449	0.909	0.88	16608	0.956	-0.107	0.92
HIST1H4G	-6	12	-1.17	0.12	1450	0.909	0.88	16607	0.956	-0.174	0.92
COX6B2	-5.99	12	-1.17	0.12	1451	0.909	0.88	16606	0.956	-0.098	0.92
MKRN1	-5.99	12	-1.17	0.12	1452	0.909	0.88	16605	0.956	-0.119	0.92
GMEB1	-5.99	12	-1.17	0.121	1453	0.909	0.879	16604	0.956	-0.124	0.92
PEPD	-5.99	12	-1.17	0.121	1454	0.909	0.879	16603	0.956	-0.216	0.92
REPS1	-5.99	12	-1.17	0.121	1455	0.909	0.879	16602	0.956	-0.191	0.92
STAT2	-5.99	12	-1.17	0.121	1456	0.909	0.879	16601	0.956	-0.159	0.92
GCDH	-5.98	12	-1.17	0.121	1457	0.909	0.879	16600	0.956	-0.292	0.92
DENND4B	-5.98	12	-1.17	0.121	1458	0.909	0.879	16599	0.956	-0.192	0.92
WISP3	-5.98	12	-1.17	0.121	1459	0.909	0.879	16598	0.956	-0.069	0.92
NEUROG3	-5.98	12	-1.17	0.121	1460	0.909	0.879	16597	0.956	-0.284	0.92
NKG7	-5.98	12	-1.17	0.121	1461	0.909	0.879	16596	0.956	-0.076	0.92
KCNJ6	-5.97	12	-1.17	0.121	1462	0.909	0.879	16595	0.956	-0.156	0.92
URAD	-5.97	12	-1.17	0.121	1463	0.909	0.879	16594	0.956	-0.244	0.92
DAGLA	-5.97	12	-1.17	0.121	1464	0.909	0.879	16593	0.956	-0.133	0.92
OR2V1	-5.97	12	-1.17	0.121	1465	0.909	0.879	16592	0.956	-0.098	0.92
ZNF383	-5.97	12	-1.17	0.122	1466	0.909	0.878	16591	0.956	-0.238	0.91
WDR88	-5.97	12	-1.17	0.122	1467	0.909	0.878	16590	0.956	-0.1	0.91
HOXC13	-5.96	12	-1.17	0.122	1468	0.909	0.878	16589	0.956	-0.042	0.91
SYPL2	-5.96	12	-1.17	0.122	1469	0.909	0.878	16588	0.956	-0.35	0.91
PDIK1L	-5.96	12	-1.17	0.122	1470	0.909	0.878	16587	0.956	-0.136	0.91
CCL15	-5.16	9	-1.17	0.122	1471	0.909	0.878	16586	0.956	-0.085	0.91
OR4C11	-5.96	12	-1.17	0.122	1472	0.909	0.878	16585	0.956	-0.085	0.91
APOF	-5.96	12	-1.17	0.122	1473	0.909	0.878	16584	0.956	-0.168	0.91
HDAC6	-5.96	12	-1.17	0.122	1474	0.909	0.878	16583	0.956	-0.188	0.91
CDC42EP2	-5.96	12	-1.17	0.122	1475	0.909	0.878	16582	0.956	-0.113	0.91
SLPI	-5.96	12	-1.17	0.122	1476	0.909	0.878	16581	0.956	-0.094	0.91
TRIM3	-5.95	12	-1.16	0.122	1477	0.909	0.878	16580	0.956	-0.089	0.91
LOR	-5.95	12	-1.16	0.122	1478	0.909	0.878	16579	0.956	-0.135	0.91
OAT	-5.95	12	-1.16	0.122	1479	0.909	0.878	16578	0.956	0.019	0.91
SRXN1	-5.95	12	-1.16	0.122	1480	0.909	0.878	16577	0.956	-0.231	0.91
C1QTNF4	-5.95	12	-1.16	0.122	1481	0.909	0.878	16576	0.956	-0.146	0.91
EIF2S3L	-5.95	12	-1.16	0.122	1482	0.909	0.878	16575	0.956	-0.155	0.91
MTMR3	-5.95	12	-1.16	0.122	1483	0.909	0.878	16574	0.956	-0.236	0.91
CALB2	-5.94	12	-1.16	0.122	1484	0.909	0.878	16573	0.956	-0.033	0.91
FBN1	-5.94	12	-1.16	0.122	1485	0.909	0.878	16572	0.956	-0.217	0.91
PLCB2	-5.94	12	-1.16	0.123	1486	0.909	0.877	16571	0.956	-0.199	0.91
MSH5	-5.94	12	-1.16	0.123	1487	0.909	0.877	16570	0.956	-0.141	0.91
TAP2	-5.94	12	-1.16	0.123	1488	0.909	0.877	16569	0.956	-0.222	0.91
TRIM44	-5.94	12	-1.16	0.123	1489	0.909	0.877	16568	0.956	-0.126	0.91
STARD13	-5.94	12	-1.16	0.123	1490	0.909	0.877	16567	0.956	-0.152	0.91
BSCL2	-5.94	12	-1.16	0.123	1491	0.909	0.877	16566	0.956	-0.156	0.91
JAZF1	-5.93	12	-1.16	0.123	1492	0.909	0.877	16565	0.956	-0.017	0.91
RRBP1	-5.93	12	-1.16	0.123	1493	0.909	0.877	16564	0.956	-0.1	0.91
HAGHL	-5.93	12	-1.16	0.123	1494	0.909	0.877	16563	0.956	-0.08	0.91
RNF103	-5.93	12	-1.16	0.123	1495	0.909	0.877	16562	0.956	-0.069	0.91
ZBED3	-5.93	12	-1.16	0.123	1496	0.909	0.877	16561	0.956	-0.255	0.91
UBAC1	-5.93	12	-1.16	0.123	1497	0.909	0.877	16560	0.956	-0.237	0.91
OR6C70	-5.93	12	-1.16	0.123	1498	0.909	0.877	16559	0.956	-0.05	0.91
MTR	-5.92	12	-1.16	0.123	1499	0.909	0.877	16558	0.956	-0.111	0.91
ZNF835	-5.92	12	-1.16	0.123	1500	0.909	0.877	16557	0.956	-0.08	0.91
IL12RB1	-5.92	12	-1.16	0.123	1501	0.909	0.877	16556	0.956	-0.108	0.91
SLCO4C1	-5.92	12	-1.16	0.123	1502	0.909	0.877	16555	0.956	-0.224	0.91
USP19	-5.92	12	-1.16	0.123	1503	0.909	0.877	16554	0.956	-0.174	0.91
MAGEB18	-5.91	12	-1.16	0.124	1504	0.909	0.876	16553	0.956	-0.272	0.91
NAP1L6	-5.91	12	-1.16	0.124	1505	0.909	0.876	16552	0.956	-0.274	0.91
TMEM102	-5.91	12	-1.16	0.124	1506	0.909	0.876	16551	0.956	-0.17	0.91
DPP6	-5.9	12	-1.16	0.124	1507	0.909	0.876	16550	0.956	-0.146	0.91
RBM38	-5.9	12	-1.15	0.124	1508	0.909	0.876	16549	0.956	-0.141	0.91
GSTK1	-5.9	12	-1.15	0.124	1509	0.909	0.876	16548	0.956	-0.047	0.91
RBM3	-5.9	12	-1.15	0.124	1510	0.909	0.876	16547	0.956	-0.147	0.91
C11orf85	-5.9	12	-1.15	0.124	1511	0.909	0.876	16546	0.956	-0.261	0.91
KRCC1	-5.9	12	-1.15	0.124	1512	0.909	0.876	16545	0.956	-0.233	0.91
LIMD1	-5.89	12	-1.15	0.124	1513	0.909	0.876	16544	0.956	-0.062	0.91
R3HDM2	-5.89	12	-1.15	0.124	1514	0.909	0.876	16543	0.956	-0.121	0.91
PKLR	-5.89	12	-1.15	0.125	1515	0.909	0.875	16542	0.956	-0.217	0.9
NCK2	-5.89	12	-1.15	0.125	1516	0.909	0.875	16541	0.956	-0.089	0.9
CLIP2	-5.88	12	-1.15	0.125	1517	0.909	0.875	16540	0.956	-0.156	0.9
MFSD4	-5.88	12	-1.15	0.125	1518	0.909	0.875	16539	0.956	-0.196	0.9
OR14C36	-5.87	12	-1.15	0.125	1519	0.909	0.875	16538	0.955	-0.205	0.9
MYADML2	-5.87	12	-1.15	0.125	1520	0.909	0.875	16537	0.955	-0.146	0.9
FAM182B	-5.87	12	-1.15	0.125	1521	0.909	0.875	16536	0.955	-0.136	0.9
RASGEF1B	-5.87	12	-1.15	0.125	1522	0.909	0.875	16535	0.955	-0.135	0.9
SFPQ	-5.86	12	-1.15	0.126	1523	0.909	0.874	16534	0.955	-0.08	0.9
ELFN2	-5.86	12	-1.15	0.126	1524	0.909	0.874	16533	0.955	-0.202	0.9
FAM136A	-5.08	9	-1.15	0.126	1525	0.909	0.874	16532	0.955	-0.131	0.9
GRM1	-5.86	12	-1.15	0.126	1526	0.909	0.874	16531	0.955	-0.13	0.9
DTX2	-5.86	12	-1.15	0.126	1527	0.909	0.874	16530	0.955	-0.238	0.9
MMP19	-5.86	12	-1.15	0.126	1528	0.909	0.874	16529	0.955	-0.143	0.9
FBXW12	-5.86	12	-1.15	0.126	1529	0.909	0.874	16528	0.955	-0.176	0.9
BMP10	-5.86	12	-1.15	0.126	1530	0.909	0.874	16527	0.955	-0.133	0.9
CEP350	-5.86	12	-1.15	0.126	1531	0.909	0.874	16526	0.955	-0.148	0.9
PLSCR5	-5.86	12	-1.15	0.126	1532	0.909	0.874	16525	0.955	-0.086	0.9
GABRB3	-5.85	12	-1.15	0.126	1533	0.909	0.874	16524	0.955	-0.063	0.9
MTX1	-5.85	12	-1.15	0.126	1534	0.909	0.874	16523	0.955	-0.373	0.9
INSM2	-5.85	12	-1.15	0.126	1535	0.909	0.874	16522	0.955	-0.146	0.9
SPRYD3	-5.85	12	-1.14	0.126	1536	0.909	0.874	16521	0.955	-0.164	0.9
PLCXD3	-5.85	12	-1.14	0.126	1537	0.909	0.874	16520	0.955	-0.296	0.9
FAM193B	-5.84	12	-1.14	0.126	1538	0.909	0.874	16519	0.955	-0.139	0.9
ZNF491	-5.84	12	-1.14	0.126	1539	0.909	0.874	16518	0.955	-0.217	0.9
RPS6KA2	-5.84	12	-1.14	0.126	1540	0.909	0.874	16517	0.955	-0.058	0.9
C3orf56	-5.84	12	-1.14	0.127	1541	0.909	0.873	16516	0.955	-0.301	0.9
ZNF398	-5.83	12	-1.14	0.127	1542	0.909	0.873	16515	0.955	-0.044	0.9
ACD	-5.83	12	-1.14	0.127	1543	0.909	0.873	16514	0.955	0.001	0.9
RNF150	-5.83	12	-1.14	0.127	1544	0.909	0.873	16513	0.955	-0.073	0.9
KLHL11	-5.82	12	-1.14	0.127	1545	0.909	0.873	16512	0.955	-0.04	0.9
PDZK1	-5.82	12	-1.14	0.127	1546	0.909	0.873	16511	0.954	-0.175	0.9
GPX6	-5.82	12	-1.14	0.127	1547	0.909	0.873	16510	0.954	-0.296	0.9
NDUFA12	-5.82	12	-1.14	0.127	1548	0.909	0.873	16509	0.954	-0.146	0.9
MAK	-5.82	12	-1.14	0.127	1549	0.909	0.873	16508	0.954	-0.102	0.9
SLC45A4	-5.82	12	-1.14	0.127	1550	0.909	0.873	16507	0.954	-0.228	0.9
WFDC6	-5.82	12	-1.14	0.127	1551	0.909	0.873	16506	0.954	-0.054	0.9
SOX14	-5.82	12	-1.14	0.127	1552	0.909	0.873	16505	0.954	-0.123	0.9
MVB12B	-5.81	12	-1.14	0.128	1553	0.909	0.872	16504	0.954	-0.167	0.89
SPRN	-5.81	12	-1.14	0.128	1554	0.909	0.872	16503	0.954	-0.105	0.89
MGAM	-5.81	12	-1.14	0.128	1555	0.909	0.872	16502	0.954	-0.226	0.89
BTBD17	-5.81	12	-1.14	0.128	1556	0.909	0.872	16501	0.954	-0.159	0.89
MTX2	-5.81	12	-1.14	0.128	1557	0.909	0.872	16500	0.954	-0.297	0.89
GNPTAB	-5.81	12	-1.14	0.128	1558	0.909	0.872	16499	0.954	-0.113	0.89
DOK7	-5.81	12	-1.14	0.128	1559	0.909	0.872	16498	0.954	-0.147	0.89
TRIM28	-5.8	12	-1.14	0.128	1560	0.909	0.872	16497	0.954	-0.204	0.89
AHCYL2	-5.8	12	-1.14	0.128	1561	0.909	0.872	16496	0.954	-0.213	0.89
MTMR2	-5.8	12	-1.14	0.128	1562	0.909	0.872	16495	0.954	-0.079	0.89
COLCA1	-5.8	12	-1.14	0.128	1563	0.909	0.872	16494	0.954	-0.063	0.89
OR51A4	-2.9	3	-1.14	0.128	1564	0.909	0.872	16493	0.954	-0.491	0.89
GIMAP8	-5.8	12	-1.14	0.128	1565	0.909	0.872	16492	0.954	-0.112	0.89
ADCY4	-5.8	12	-1.14	0.128	1566	0.909	0.872	16491	0.954	-0.237	0.89
CLTC	-5.8	12	-1.14	0.128	1567	0.909	0.872	16490	0.954	-0.216	0.89
PSMD4	-5.8	12	-1.14	0.128	1568	0.909	0.872	16489	0.954	-0.46	0.89
POLR2C	-5.8	12	-1.14	0.128	1569	0.909	0.872	16488	0.954	-0.459	0.89
TEAD1	-5.79	12	-1.13	0.128	1570	0.909	0.872	16487	0.954	-0.124	0.89
OAS2	-5.79	12	-1.13	0.128	1571	0.909	0.872	16486	0.954	-0.196	0.89
AKAP14	-5.79	12	-1.13	0.128	1572	0.909	0.872	16485	0.954	-0.211	0.89
DENND4A	-5.79	12	-1.13	0.128	1573	0.909	0.872	16484	0.954	-0.175	0.89
STX1A	-5.79	12	-1.13	0.129	1574	0.909	0.871	16483	0.954	-0.205	0.89
GCHFR	-5.78	12	-1.13	0.129	1575	0.909	0.871	16482	0.954	-0.246	0.89
APOBEC3A	-5.78	12	-1.13	0.129	1576	0.909	0.871	16481	0.954	-0.213	0.89
KIR3DX1	-5.78	12	-1.13	0.129	1577	0.909	0.871	16480	0.954	-0.189	0.89
CACTIN	-5.78	12	-1.13	0.129	1578	0.909	0.871	16479	0.954	-0.228	0.89
PIP4K2A	-5.78	12	-1.13	0.129	1579	0.909	0.871	16478	0.954	-0.22	0.89
HOGA1	-5.78	12	-1.13	0.129	1580	0.909	0.871	16477	0.954	-0.286	0.89
LMOD3	-5.78	12	-1.13	0.129	1581	0.909	0.871	16476	0.954	-0.119	0.89
GPM6A	-5.78	12	-1.13	0.129	1582	0.909	0.871	16475	0.954	-0.226	0.89
HOXA4	-5.78	12	-1.13	0.129	1583	0.909	0.871	16474	0.954	0.054	0.89
ULK4	-5.77	12	-1.13	0.129	1584	0.909	0.871	16473	0.954	-0.138	0.89
KRT31	-5.77	12	-1.13	0.129	1585	0.909	0.871	16472	0.954	-0.097	0.89
AWAT2	-5.77	12	-1.13	0.129	1586	0.909	0.871	16471	0.954	-0.09	0.89
ATAD3B	-5.77	12	-1.13	0.129	1587	0.909	0.871	16470	0.954	0.056	0.89
SLCO1B1	-5.77	12	-1.13	0.129	1588	0.909	0.871	16469	0.954	-0.128	0.89
SLC2A13	-5.76	12	-1.13	0.129	1589	0.909	0.871	16468	0.954	-0.129	0.89
OR10W1	-5.76	12	-1.13	0.13	1590	0.909	0.87	16467	0.954	-0.053	0.89
CNTLN	-5.76	12	-1.13	0.13	1591	0.909	0.87	16466	0.954	-0.138	0.89
CEACAM8	-5.76	12	-1.13	0.13	1592	0.909	0.87	16465	0.954	-0.054	0.89
CNTROB	-5.76	12	-1.13	0.13	1593	0.909	0.87	16464	0.954	-0.067	0.89
ARHGEF18	-5.76	12	-1.13	0.13	1594	0.909	0.87	16463	0.954	-0.127	0.89
FZD2	-5.76	12	-1.13	0.13	1595	0.909	0.87	16462	0.954	-0.175	0.89
SEMA6C	-5.76	12	-1.13	0.13	1596	0.909	0.87	16461	0.954	-0.254	0.89
C11orf30	-5.76	12	-1.13	0.13	1597	0.909	0.87	16460	0.954	-0.144	0.89
NKAIN3	-5.75	12	-1.13	0.13	1598	0.909	0.87	16459	0.954	-0.125	0.89
PLS1	-5.75	12	-1.13	0.13	1599	0.909	0.87	16458	0.954	-0.071	0.89
PABPC3	-5.75	12	-1.13	0.13	1600	0.909	0.87	16457	0.954	-0.144	0.89
DTX1	-5.75	12	-1.13	0.13	1601	0.909	0.87	16456	0.954	-0.181	0.89
PRR11	-5.75	12	-1.13	0.13	1602	0.909	0.87	16455	0.954	-0.16	0.89
FAM198B	-5.75	12	-1.13	0.13	1603	0.909	0.87	16454	0.954	-0.116	0.89
TRAF7	-5.75	12	-1.13	0.13	1604	0.909	0.87	16453	0.954	0.034	0.89
LRPAP1	-5.74	12	-1.12	0.13	1605	0.909	0.87	16452	0.954	-0.02	0.89
ZWILCH	-5.74	12	-1.12	0.13	1606	0.909	0.87	16451	0.954	-0.265	0.89
CUL7	-5.74	12	-1.12	0.13	1607	0.909	0.87	16450	0.954	-0.22	0.89
DCST1	-5.74	12	-1.12	0.131	1608	0.909	0.869	16449	0.954	-0.081	0.88
QDPR	-5.74	12	-1.12	0.131	1609	0.909	0.869	16448	0.954	-0.105	0.88
LYL1	-5.74	12	-1.12	0.131	1610	0.909	0.869	16447	0.954	-0.18	0.88
NONO	-5.73	12	-1.12	0.131	1611	0.909	0.869	16446	0.954	-0.392	0.88
MSH4	-5.73	12	-1.12	0.131	1612	0.909	0.869	16445	0.954	0.031	0.88
PLBD1	-5.73	12	-1.12	0.131	1613	0.909	0.869	16444	0.954	-0.098	0.88
AIPL1	-5.73	12	-1.12	0.131	1614	0.909	0.869	16443	0.954	-0.177	0.88
SPPL2A	-5.73	12	-1.12	0.131	1615	0.909	0.869	16442	0.954	0.001	0.88
GIMAP6	-5.73	12	-1.12	0.131	1616	0.909	0.869	16441	0.954	-0.167	0.88
C15orf54	-5.72	12	-1.12	0.131	1617	0.909	0.869	16440	0.954	-0.279	0.88
F7	-5.72	12	-1.12	0.131	1618	0.909	0.869	16439	0.954	-0.087	0.88
CASQ2	-5.72	12	-1.12	0.131	1619	0.909	0.869	16438	0.954	-0.146	0.88
AC007431.1	-5.72	12	-1.12	0.131	1620	0.909	0.869	16437	0.954	-0.137	0.88
C4orf40	-5.72	12	-1.12	0.131	1621	0.909	0.869	16436	0.954	-0.08	0.88
TNFSF4	-5.72	12	-1.12	0.131	1622	0.909	0.869	16435	0.954	-0.024	0.88
PLEKHA4	-5.72	12	-1.12	0.131	1623	0.909	0.869	16434	0.954	-0.044	0.88
SLC2A7	-5.72	12	-1.12	0.131	1624	0.909	0.869	16433	0.954	-0.237	0.88
TREM2	-5.72	12	-1.12	0.131	1625	0.909	0.869	16432	0.954	-0.086	0.88
SERPINB9	-5.71	12	-1.12	0.131	1626	0.909	0.869	16431	0.954	-0.143	0.88
C3orf83	-5.71	12	-1.12	0.132	1627	0.909	0.868	16430	0.954	-0.164	0.88
RYR1	-5.71	12	-1.12	0.132	1628	0.909	0.868	16429	0.954	-0.262	0.88
BAIAP2	-5.71	12	-1.12	0.132	1629	0.909	0.868	16428	0.954	-0.252	0.88
CYP2S1	-5.71	12	-1.12	0.132	1630	0.909	0.868	16427	0.954	0.077	0.88
CAPN7	-5.71	12	-1.12	0.132	1631	0.909	0.868	16426	0.954	-0.138	0.88
TMEM70	-5.71	12	-1.12	0.132	1632	0.909	0.868	16425	0.954	-0.12	0.88
WT1	-5.7	12	-1.12	0.132	1633	0.909	0.868	16424	0.954	-0.14	0.88
CACNA1E	-5.7	12	-1.12	0.132	1634	0.909	0.868	16423	0.954	-0.226	0.88
RNF32	-5.7	12	-1.12	0.132	1635	0.909	0.868	16422	0.954	-0.107	0.88
ARFGEF2	-5.7	12	-1.12	0.132	1636	0.909	0.868	16421	0.954	-0.056	0.88
ZNF45	-5.7	12	-1.12	0.132	1637	0.909	0.868	16420	0.954	-0.003	0.88
OR6C2	-5.7	12	-1.12	0.132	1638	0.909	0.868	16419	0.954	-0.078	0.88
DIP2C	-5.7	12	-1.12	0.132	1639	0.909	0.868	16418	0.954	-0.176	0.88
CCKBR	-5.7	12	-1.12	0.132	1640	0.909	0.868	16417	0.954	-0.076	0.88
CDK4	-5.69	12	-1.12	0.132	1641	0.909	0.868	16416	0.954	-0.38	0.88
BRMS1L	-5.69	12	-1.11	0.132	1642	0.909	0.868	16415	0.954	-0.087	0.88
MADD	-5.69	12	-1.11	0.132	1643	0.909	0.868	16414	0.954	-0.255	0.88
YAP1	-5.69	12	-1.11	0.133	1644	0.909	0.867	16413	0.954	-0.314	0.88
PRKCZ	-5.69	12	-1.11	0.133	1645	0.909	0.867	16412	0.954	-0.22	0.88
CMTM5	-5.69	12	-1.11	0.133	1646	0.909	0.867	16411	0.954	-0.027	0.88
LRFN2	-5.68	12	-1.11	0.133	1647	0.909	0.867	16410	0.954	-0.027	0.88
ATP1B3	-5.68	12	-1.11	0.133	1648	0.909	0.867	16409	0.954	-0.034	0.88
GIPC2	-5.68	12	-1.11	0.133	1649	0.909	0.867	16408	0.954	-0.143	0.88
IYD	-5.68	12	-1.11	0.133	1650	0.909	0.867	16407	0.954	-0.121	0.88
HSH2D	-5.67	12	-1.11	0.133	1651	0.909	0.867	16406	0.954	-0.171	0.88
FMN1	-5.67	12	-1.11	0.133	1652	0.909	0.867	16405	0.954	-0.11	0.88
TCHH	-5.67	12	-1.11	0.133	1653	0.909	0.867	16404	0.954	-0.16	0.88
AKT2	-5.67	12	-1.11	0.133	1654	0.909	0.867	16403	0.954	-0.185	0.88
APOBEC3D	-5.67	12	-1.11	0.133	1655	0.909	0.867	16402	0.954	-0.141	0.88
CACNG7	-5.67	12	-1.11	0.133	1656	0.909	0.867	16401	0.954	-0.144	0.88
SNX25	-5.67	12	-1.11	0.133	1657	0.909	0.867	16400	0.954	-0.246	0.88
IRX5	-5.66	12	-1.11	0.133	1658	0.909	0.867	16399	0.954	-0.308	0.88
PTPLAD2	-5.66	12	-1.11	0.134	1659	0.909	0.866	16398	0.954	-0.088	0.87
C19orf66	-5.66	12	-1.11	0.134	1660	0.909	0.866	16397	0.954	-0.123	0.87
SIAH3	-5.66	12	-1.11	0.134	1661	0.909	0.866	16396	0.954	-0.108	0.87
STYX	-5.65	12	-1.11	0.134	1662	0.909	0.866	16395	0.954	-0.083	0.87
GNG4	-5.65	12	-1.11	0.134	1663	0.909	0.866	16394	0.954	-0.088	0.87
BRINP1	-5.65	12	-1.11	0.134	1664	0.909	0.866	16393	0.954	-0.184	0.87
KIAA1549L	-5.65	12	-1.11	0.134	1665	0.909	0.866	16392	0.954	-0.09	0.87
ADORA3	-5.65	12	-1.11	0.134	1666	0.909	0.866	16391	0.954	-0.06	0.87
FGFBP1	-5.65	12	-1.11	0.134	1667	0.909	0.866	16390	0.954	-0.223	0.87
ANKRD62	-5.65	12	-1.11	0.134	1668	0.909	0.866	16389	0.954	-0.182	0.87
ADCK2	-5.64	12	-1.11	0.134	1669	0.909	0.866	16388	0.954	-0.078	0.87
GXYLT1	-5.64	12	-1.11	0.134	1670	0.909	0.866	16387	0.954	-0.09	0.87
ATPAF1	-5.64	12	-1.11	0.134	1671	0.909	0.866	16386	0.954	-0.186	0.87
G6PC	-5.64	12	-1.11	0.135	1672	0.909	0.865	16385	0.954	-0.119	0.87
SPINT1	-5.64	12	-1.1	0.135	1673	0.909	0.865	16384	0.954	-0.044	0.87
SNAI2	-5.64	12	-1.1	0.135	1674	0.909	0.865	16383	0.954	-0.224	0.87
BRAF	-5.63	12	-1.1	0.135	1675	0.909	0.865	16382	0.954	-0.182	0.87
FAM71E1	-5.63	12	-1.1	0.135	1676	0.909	0.865	16381	0.954	-0.224	0.87
FLT3	-5.63	12	-1.1	0.135	1677	0.909	0.865	16380	0.954	-0.097	0.87
SCN1B	-5.63	12	-1.1	0.135	1678	0.909	0.865	16379	0.954	-0.14	0.87
VRK3	-5.63	12	-1.1	0.135	1679	0.909	0.865	16378	0.954	-0.039	0.87
SLC25A33	-5.62	12	-1.1	0.135	1680	0.909	0.865	16377	0.954	-0.135	0.87
GBP4	-5.62	12	-1.1	0.135	1681	0.909	0.865	16376	0.954	-0.155	0.87
LIMS1	-5.62	12	-1.1	0.135	1682	0.909	0.865	16375	0.953	-0.3	0.87
TCP11	-5.62	12	-1.1	0.135	1683	0.909	0.865	16374	0.953	-0.079	0.87
EPM2AIP1	-5.62	12	-1.1	0.135	1684	0.909	0.865	16373	0.953	-0.119	0.87
LCE6A	-5.62	12	-1.1	0.135	1685	0.909	0.865	16372	0.953	-0.157	0.87
C2orf61	-5.61	12	-1.1	0.136	1686	0.909	0.864	16371	0.953	-0.117	0.87
OTUD7A	-5.61	12	-1.1	0.136	1687	0.909	0.864	16370	0.953	-0.108	0.87
DACH1	-5.61	12	-1.1	0.136	1688	0.909	0.864	16369	0.953	-0.129	0.87
PWWP2A	-5.61	12	-1.1	0.136	1689	0.909	0.864	16368	0.953	-0.14	0.87
JMJD6	-5.61	12	-1.1	0.136	1690	0.909	0.864	16367	0.953	-0.059	0.87
GJA8	-5.61	12	-1.1	0.136	1691	0.909	0.864	16366	0.953	-0.311	0.87
CFL2	-5.61	12	-1.1	0.136	1692	0.909	0.864	16365	0.953	-0.058	0.87
COL4A3BP	-5.6	12	-1.1	0.136	1693	0.909	0.864	16364	0.953	-0.31	0.87
DESI2	-5.6	12	-1.1	0.136	1694	0.909	0.864	16363	0.953	-0.209	0.87
PAK6	-5.6	12	-1.1	0.136	1695	0.909	0.864	16362	0.953	-0.026	0.87
ZC3H14	-5.6	12	-1.1	0.136	1696	0.909	0.864	16361	0.953	-0.223	0.87
RAB3B	-5.6	12	-1.1	0.136	1697	0.909	0.864	16360	0.953	-0.211	0.87
MVB12A	-5.6	12	-1.1	0.136	1698	0.909	0.864	16359	0.953	-0.098	0.87
ABCC4	-5.6	12	-1.1	0.136	1699	0.909	0.864	16358	0.953	-0.132	0.87
COX11	-5.6	12	-1.1	0.136	1700	0.909	0.864	16357	0.953	-0.098	0.87
TNK1	-5.6	12	-1.1	0.136	1701	0.909	0.864	16356	0.953	-0.226	0.87
CDH24	-5.6	12	-1.1	0.136	1702	0.909	0.864	16355	0.953	-0.067	0.87
FAM89A	-5.6	12	-1.1	0.136	1703	0.909	0.864	16354	0.953	-0.058	0.87
AKAP13	-5.6	12	-1.1	0.136	1704	0.909	0.864	16353	0.953	-0.324	0.87
SLC47A2	-5.6	12	-1.1	0.136	1705	0.909	0.864	16352	0.953	-0.256	0.87
C1orf85	-5.59	12	-1.1	0.136	1706	0.909	0.864	16351	0.953	-0.104	0.87
RASGRP4	-5.59	12	-1.1	0.136	1707	0.909	0.864	16350	0.953	-0.146	0.87
ZFP69	-5.59	12	-1.1	0.136	1708	0.909	0.864	16349	0.953	-0.31	0.87
PPM1F	-5.59	12	-1.1	0.136	1709	0.909	0.864	16348	0.953	-0.185	0.87
SPATA7	-5.58	12	-1.09	0.137	1710	0.909	0.863	16347	0.953	-0.165	0.86
FAM194A	-5.58	12	-1.09	0.137	1711	0.909	0.863	16346	0.953	-0.37	0.86
PINK1	-5.58	12	-1.09	0.137	1712	0.909	0.863	16345	0.953	-0.329	0.86
METTL20	-5.58	12	-1.09	0.137	1713	0.909	0.863	16344	0.953	-0.169	0.86
RNF25	-5.58	12	-1.09	0.137	1714	0.909	0.863	16343	0.953	0.059	0.86
KDELR1	-5.58	12	-1.09	0.137	1715	0.909	0.863	16342	0.953	-0.046	0.86
OR7D4	-5.57	12	-1.09	0.137	1716	0.909	0.863	16341	0.953	-0.144	0.86
ACTC1	-5.57	12	-1.09	0.137	1717	0.909	0.863	16340	0.953	-0.206	0.86
C9orf47	-5.57	12	-1.09	0.137	1718	0.909	0.863	16339	0.953	-0.273	0.86
SORT1	-5.57	12	-1.09	0.137	1719	0.909	0.863	16338	0.953	-0.053	0.86
GPR183	-5.57	12	-1.09	0.137	1720	0.909	0.863	16337	0.953	-0.164	0.86
KRBOX4	-2.79	3	-1.09	0.137	1721	0.909	0.863	16336	0.953	-0.261	0.86
MS4A4E	-5.57	12	-1.09	0.137	1722	0.909	0.863	16335	0.953	-0.099	0.86
MEST	-5.57	12	-1.09	0.137	1723	0.909	0.863	16334	0.953	-0.112	0.86
ZNF141	-4.82	9	-1.09	0.137	1724	0.909	0.863	16333	0.953	-0.244	0.86
RAVER2	-5.57	12	-1.09	0.137	1725	0.909	0.863	16332	0.953	-0.154	0.86
SZRD1	-5.57	12	-1.09	0.138	1726	0.909	0.862	16331	0.953	-0.329	0.86
TRIM29	-5.57	12	-1.09	0.138	1727	0.909	0.862	16330	0.953	-0.053	0.86
FAM208A	-5.56	12	-1.09	0.138	1728	0.909	0.862	16329	0.953	-0.106	0.86
SNAP47	-5.56	12	-1.09	0.138	1729	0.909	0.862	16328	0.953	-0.24	0.86
RHPN1	-5.56	12	-1.09	0.138	1730	0.909	0.862	16327	0.953	-0.252	0.86
NCBP2L	-5.56	12	-1.09	0.138	1731	0.909	0.862	16326	0.953	-0.325	0.86
MYSM1	-5.56	12	-1.09	0.138	1732	0.909	0.862	16325	0.953	-0.09	0.86
RP11-422N16.3	-5.56	12	-1.09	0.138	1733	0.909	0.862	16324	0.953	-0.226	0.86
RASSF5	-5.56	12	-1.09	0.138	1734	0.909	0.862	16323	0.953	-0.01	0.86
UST	-5.56	12	-1.09	0.138	1735	0.909	0.862	16322	0.953	-0.141	0.86
CCL26	-5.56	12	-1.09	0.138	1736	0.909	0.862	16321	0.953	-0.074	0.86
SCG3	-5.56	12	-1.09	0.138	1737	0.909	0.862	16320	0.953	-0.369	0.86
NRAP	-5.56	12	-1.09	0.138	1738	0.909	0.862	16319	0.953	-0.112	0.86
ITGA7	-5.56	12	-1.09	0.138	1739	0.909	0.862	16318	0.953	-0.038	0.86
TRIM42	-5.56	12	-1.09	0.138	1740	0.909	0.862	16317	0.953	-0.171	0.86
MAML1	-5.55	12	-1.09	0.138	1741	0.909	0.862	16316	0.953	-0.245	0.86
MS4A8	-5.55	12	-1.09	0.138	1742	0.909	0.862	16315	0.953	-0.102	0.86
KLHL10	-5.55	12	-1.09	0.138	1743	0.909	0.862	16314	0.953	-0.186	0.86
PTPRA	-5.55	12	-1.09	0.138	1744	0.909	0.862	16313	0.953	-0.151	0.86
ZFAND2B	-5.55	12	-1.09	0.138	1745	0.909	0.862	16312	0.953	-0.108	0.86
KRTAP19-8	-5.54	12	-1.09	0.138	1746	0.909	0.862	16311	0.953	-0.174	0.86
FBXO32	-5.54	12	-1.09	0.139	1747	0.909	0.861	16310	0.953	-0.258	0.86
GBP5	-5.54	12	-1.09	0.139	1748	0.909	0.861	16309	0.953	-0.11	0.86
SNAI1	-5.54	12	-1.09	0.139	1749	0.909	0.861	16308	0.953	-0.247	0.86
CHRNA7	-5.54	12	-1.09	0.139	1750	0.909	0.861	16307	0.953	-0.243	0.86
CD22	-5.54	12	-1.09	0.139	1751	0.909	0.861	16306	0.953	-0.231	0.86
CDH10	-5.54	12	-1.09	0.139	1752	0.909	0.861	16305	0.953	-0.261	0.86
HRG	-5.54	12	-1.09	0.139	1753	0.909	0.861	16304	0.953	-0.185	0.86
FAM159A	-5.53	12	-1.08	0.139	1754	0.909	0.861	16303	0.953	-0.109	0.86
ATP6AP1L	-5.53	12	-1.08	0.139	1755	0.909	0.861	16302	0.953	-0.181	0.86
GZMK	-5.52	12	-1.08	0.139	1756	0.909	0.861	16301	0.953	-0.132	0.86
SLAMF7	-5.52	12	-1.08	0.139	1757	0.909	0.861	16300	0.953	-0.165	0.86
GIF	-5.52	12	-1.08	0.139	1758	0.909	0.861	16299	0.953	-0.172	0.86
CCDC125	-5.52	12	-1.08	0.14	1759	0.909	0.86	16298	0.953	-0.087	0.85
LEPROT	-4.78	9	-1.08	0.14	1760	0.909	0.86	16297	0.953	-0.289	0.85
POLR2J2	-2.76	3	-1.08	0.14	1761	0.909	0.86	16296	0.953	-0.358	0.85
GSS	-5.52	12	-1.08	0.14	1762	0.909	0.86	16295	0.953	-0.272	0.85
FBXO24	-5.52	12	-1.08	0.14	1763	0.909	0.86	16294	0.953	-0.154	0.85
PIFO	-5.51	12	-1.08	0.14	1764	0.909	0.86	16293	0.953	-0.211	0.85
EHD1	-5.51	12	-1.08	0.14	1765	0.909	0.86	16292	0.953	-0.113	0.85
TSPAN16	-5.51	12	-1.08	0.14	1766	0.909	0.86	16291	0.953	-0.17	0.85
GPRIN2	-5.51	12	-1.08	0.14	1767	0.909	0.86	16290	0.953	-0.096	0.85
ZNF385A	-5.51	12	-1.08	0.14	1768	0.909	0.86	16289	0.953	-0.212	0.85
SMKR1	-5.51	12	-1.08	0.14	1769	0.909	0.86	16288	0.953	-0.002	0.85
AP3S1	-5.5	12	-1.08	0.14	1770	0.909	0.86	16287	0.953	-0.126	0.85
ZNF101	-5.5	12	-1.08	0.14	1771	0.909	0.86	16286	0.953	-0.236	0.85
TMEM89	-5.5	12	-1.08	0.14	1772	0.909	0.86	16285	0.953	-0.109	0.85
AP4B1	-5.5	12	-1.08	0.14	1773	0.909	0.86	16284	0.953	-0.127	0.85
NPY5R	-5.5	12	-1.08	0.14	1774	0.909	0.86	16283	0.953	-0.187	0.85
INTS1	-5.5	12	-1.08	0.14	1775	0.909	0.86	16282	0.953	-0.129	0.85
OLFML1	-5.5	12	-1.08	0.14	1776	0.909	0.86	16281	0.953	-0.239	0.85
FCAR	-5.49	12	-1.08	0.141	1777	0.909	0.859	16280	0.953	0.049	0.85
GRPEL2	-5.49	12	-1.08	0.141	1778	0.909	0.859	16279	0.953	-0.375	0.85
SGK2	-5.49	12	-1.08	0.141	1779	0.909	0.859	16278	0.953	-0.214	0.85
EDARADD	-5.49	12	-1.08	0.141	1780	0.909	0.859	16277	0.953	-0.023	0.85
SLC1A7	-5.49	12	-1.08	0.141	1781	0.909	0.859	16276	0.953	-0.169	0.85
NCF1	-5.49	12	-1.08	0.141	1782	0.909	0.859	16275	0.953	-0.202	0.85
GLTSCR1L	-5.49	12	-1.08	0.141	1783	0.909	0.859	16274	0.953	-0.207	0.85
ANKS1A	-5.49	12	-1.08	0.141	1784	0.909	0.859	16273	0.953	-0.063	0.85
TAS2R8	-5.49	12	-1.08	0.141	1785	0.909	0.859	16272	0.953	-0.011	0.85
RAMP2	-5.48	12	-1.08	0.141	1786	0.909	0.859	16271	0.953	-0.013	0.85
GOLPH3	-5.48	12	-1.08	0.141	1787	0.909	0.859	16270	0.953	-0.145	0.85
GIGYF1	-5.48	12	-1.08	0.141	1788	0.909	0.859	16269	0.953	-0.196	0.85
SMARCE1	-5.48	12	-1.08	0.141	1789	0.909	0.859	16268	0.953	0.35	0.85
HMGN5	-4.75	9	-1.08	0.141	1790	0.909	0.859	16267	0.953	-0.084	0.85
FAM180A	-5.48	12	-1.08	0.141	1791	0.909	0.859	16266	0.953	-0.172	0.85
BCL7B	-5.48	12	-1.08	0.141	1792	0.909	0.859	16265	0.953	-0.143	0.85
ZSWIM7	-5.48	12	-1.08	0.141	1793	0.909	0.859	16264	0.953	-0.189	0.85
TXNDC12	-5.48	12	-1.08	0.141	1794	0.909	0.859	16263	0.953	-0.139	0.85
SWSAP1	-5.48	12	-1.07	0.141	1795	0.909	0.859	16262	0.953	-0.142	0.85
TCEA3	-5.47	12	-1.07	0.141	1796	0.909	0.859	16261	0.953	-0.115	0.85
ZNF696	-5.47	12	-1.07	0.141	1797	0.909	0.859	16260	0.953	-0.027	0.85
TEKT5	-5.47	12	-1.07	0.141	1798	0.909	0.859	16259	0.953	-0.151	0.85
CEP63	-5.47	12	-1.07	0.142	1799	0.909	0.858	16258	0.953	-0.028	0.85
LGALS12	-5.47	12	-1.07	0.142	1800	0.909	0.858	16257	0.953	0.011	0.85
CEP97	-5.47	12	-1.07	0.142	1801	0.909	0.858	16256	0.953	-0.199	0.85
CYP3A43	-5.47	12	-1.07	0.142	1802	0.909	0.858	16255	0.953	-0.111	0.85
SLC9C1	-5.47	12	-1.07	0.142	1803	0.909	0.858	16254	0.953	-0.186	0.85
HSD17B14	-5.47	12	-1.07	0.142	1804	0.909	0.858	16253	0.953	-0.18	0.85
CTTNBP2NL	-5.46	12	-1.07	0.142	1805	0.909	0.858	16252	0.953	-0.19	0.85
FAM155B	-5.46	12	-1.07	0.142	1806	0.909	0.858	16251	0.953	-0.258	0.85
FUNDC1	-5.46	12	-1.07	0.142	1807	0.909	0.858	16250	0.953	-0.068	0.85
SORD	-5.45	12	-1.07	0.142	1808	0.909	0.858	16249	0.953	0.071	0.85
UBE2D1	-5.45	12	-1.07	0.142	1809	0.909	0.858	16248	0.953	-0.175	0.85
ZFR	-5.45	12	-1.07	0.142	1810	0.909	0.858	16247	0.953	-0.229	0.85
GOLT1A	-5.45	12	-1.07	0.142	1811	0.909	0.858	16246	0.953	-0.001	0.85
NPFF	-5.45	12	-1.07	0.142	1812	0.909	0.858	16245	0.953	-0.158	0.85
RERGL	-5.45	12	-1.07	0.142	1813	0.909	0.858	16244	0.953	-0.105	0.85
USP8	-5.45	12	-1.07	0.142	1814	0.909	0.858	16243	0.953	-0.28	0.85
IPO8	-5.45	12	-1.07	0.142	1815	0.909	0.858	16242	0.953	-0.159	0.85
CNTRL	-5.45	12	-1.07	0.143	1816	0.909	0.857	16241	0.953	-0.343	0.84
FKBP10	-5.45	12	-1.07	0.143	1817	0.909	0.857	16240	0.953	-0.291	0.84
OR5M8	-5.45	12	-1.07	0.143	1818	0.909	0.857	16239	0.953	-0.139	0.84
EFNA1	-5.45	12	-1.07	0.143	1819	0.909	0.857	16238	0.953	-0.181	0.84
KRT19	-5.45	12	-1.07	0.143	1820	0.909	0.857	16237	0.953	-0.29	0.84
PARP8	-5.45	12	-1.07	0.143	1821	0.909	0.857	16236	0.953	-0.07	0.84
ANKRD55	-5.44	12	-1.07	0.143	1822	0.909	0.857	16235	0.953	-0.191	0.84
DIP2B	-5.44	12	-1.07	0.143	1823	0.909	0.857	16234	0.953	-0.164	0.84
C9orf37	-5.44	12	-1.07	0.143	1824	0.909	0.857	16233	0.953	-0.166	0.84
DGKI	-5.44	12	-1.07	0.143	1825	0.909	0.857	16232	0.953	-0.297	0.84
SESTD1	-5.44	12	-1.07	0.143	1826	0.909	0.857	16231	0.953	-0.073	0.84
MBLAC1	-5.44	12	-1.07	0.143	1827	0.909	0.857	16230	0.953	-0.01	0.84
NUP107	-5.44	12	-1.07	0.143	1828	0.909	0.857	16229	0.953	-0.246	0.84
NXF1	-5.44	12	-1.07	0.143	1829	0.909	0.857	16228	0.953	0.266	0.84
COQ7	-5.44	12	-1.07	0.143	1830	0.909	0.857	16227	0.953	-0.139	0.84
RABL5	-5.43	12	-1.07	0.143	1831	0.909	0.857	16226	0.953	-0.068	0.84
C11orf54	-5.43	12	-1.07	0.143	1832	0.909	0.857	16225	0.953	-0.003	0.84
C11orf74	-3.84	6	-1.07	0.143	1833	0.909	0.857	16224	0.953	-0.426	0.84
GBP6	-5.43	12	-1.06	0.143	1834	0.909	0.857	16223	0.953	-0.289	0.84
CNNM2	-5.42	12	-1.06	0.144	1835	0.909	0.856	16222	0.953	-0.203	0.84
PLP2	-5.42	12	-1.06	0.144	1836	0.909	0.856	16221	0.953	-0.03	0.84
ARID3B	-5.42	12	-1.06	0.144	1837	0.909	0.856	16220	0.953	-0.075	0.84
HOXD3	-5.42	12	-1.06	0.144	1838	0.909	0.856	16219	0.953	-0.075	0.84
CCNB2	-5.42	12	-1.06	0.144	1839	0.909	0.856	16218	0.953	-0.207	0.84
DNAJC27	-5.41	12	-1.06	0.144	1840	0.909	0.856	16217	0.953	-0.059	0.84
REPIN1	-5.41	12	-1.06	0.144	1841	0.909	0.856	16216	0.953	-0.162	0.84
PRG4	-5.41	12	-1.06	0.144	1842	0.909	0.856	16215	0.953	-0.241	0.84
ERAP2	-5.41	12	-1.06	0.144	1843	0.909	0.856	16214	0.953	-0.13	0.84
GRAMD1C	-5.41	12	-1.06	0.144	1844	0.909	0.856	16213	0.953	-0.063	0.84
KBTBD12	-5.41	12	-1.06	0.144	1845	0.909	0.856	16212	0.953	-0.171	0.84
OR5K4	-5.41	12	-1.06	0.144	1846	0.909	0.856	16211	0.953	-0.327	0.84
CCL20	-5.41	12	-1.06	0.144	1847	0.909	0.856	16210	0.953	-0.179	0.84
RXFP1	-5.4	12	-1.06	0.144	1848	0.909	0.856	16209	0.953	-0.065	0.84
VWA7	-5.4	12	-1.06	0.144	1849	0.909	0.856	16208	0.953	-0.13	0.84
C6orf15	-5.4	12	-1.06	0.145	1850	0.909	0.855	16207	0.953	-0.095	0.84
DYNC2LI1	-5.4	12	-1.06	0.145	1851	0.909	0.855	16206	0.953	-0.26	0.84
GCH1	-5.4	12	-1.06	0.145	1852	0.909	0.855	16205	0.953	-0.16	0.84
FCRL6	-5.4	12	-1.06	0.145	1853	0.909	0.855	16204	0.953	-0.161	0.84
NEUROD2	-5.4	12	-1.06	0.145	1854	0.909	0.855	16203	0.953	-0.36	0.84
ATXN2	-5.39	12	-1.06	0.145	1855	0.909	0.855	16202	0.953	-0.177	0.84
AHI1	-5.39	12	-1.06	0.145	1856	0.909	0.855	16201	0.953	-0.309	0.84
TRMT12	-5.39	12	-1.06	0.145	1857	0.909	0.855	16200	0.953	-0.037	0.84
ZNF84	-5.39	12	-1.06	0.145	1858	0.909	0.855	16199	0.953	-0.187	0.84
SS18	-5.39	12	-1.06	0.145	1859	0.909	0.855	16198	0.953	-0.146	0.84
SPINT2	-5.39	12	-1.06	0.145	1860	0.909	0.855	16197	0.953	-0.162	0.84
CLCA1	-5.39	12	-1.06	0.145	1861	0.909	0.855	16196	0.953	-0.075	0.84
BSND	-5.39	12	-1.06	0.145	1862	0.909	0.855	16195	0.953	-0.217	0.84
C7orf62	-5.38	12	-1.06	0.145	1863	0.909	0.855	16194	0.953	-0.223	0.84
LSR	-5.38	12	-1.06	0.145	1864	0.909	0.855	16193	0.953	-0.07	0.84
PRR19	-5.38	12	-1.06	0.145	1865	0.909	0.855	16192	0.953	-0.073	0.84
DNAJC25	-5.38	12	-1.06	0.145	1866	0.909	0.855	16191	0.953	-0.096	0.84
ELAVL3	-5.38	12	-1.06	0.145	1867	0.909	0.855	16190	0.953	0.036	0.84
FAM83H	-5.38	12	-1.06	0.145	1868	0.909	0.855	16189	0.953	-0.077	0.84
EFCC1	-5.38	12	-1.06	0.145	1869	0.909	0.855	16188	0.953	-0.093	0.84
AHCYL1	-5.38	12	-1.06	0.146	1870	0.909	0.854	16187	0.953	-0.088	0.84
IQSEC1	-5.38	12	-1.06	0.146	1871	0.909	0.854	16186	0.953	-0.135	0.84
TFAP2B	-5.38	12	-1.06	0.146	1872	0.909	0.854	16185	0.953	0.072	0.84
SPIN1	-5.37	12	-1.06	0.146	1873	0.909	0.854	16184	0.953	-0.187	0.84
COX5A	-5.37	12	-1.05	0.146	1874	0.909	0.854	16183	0.953	-0.151	0.84
PLVAP	-5.37	12	-1.05	0.146	1875	0.909	0.854	16182	0.953	-0.176	0.84
TRIM33	-5.37	12	-1.05	0.146	1876	0.909	0.854	16181	0.953	-0.022	0.84
DVL3	-5.37	12	-1.05	0.146	1877	0.909	0.854	16180	0.953	-0.094	0.84
PDE11A	-5.37	12	-1.05	0.146	1878	0.909	0.854	16179	0.953	-0.105	0.84
TSPAN18	-5.37	12	-1.05	0.146	1879	0.909	0.854	16178	0.953	-0.023	0.84
PPM1N	-5.37	12	-1.05	0.146	1880	0.909	0.854	16177	0.953	-0.056	0.84
TMPRSS3	-5.37	12	-1.05	0.146	1881	0.909	0.854	16176	0.953	-0.143	0.84
MANEAL	-5.36	12	-1.05	0.146	1882	0.909	0.854	16175	0.953	-0.218	0.84
OR2T27	-2.68	3	-1.05	0.146	1883	0.909	0.854	16174	0.953	-0.486	0.84
VIPAS39	-5.36	12	-1.05	0.146	1884	0.909	0.854	16173	0.953	-0.115	0.84
HTR5A	-5.36	12	-1.05	0.146	1885	0.909	0.854	16172	0.953	-0.035	0.84
SLC5A6	-5.36	12	-1.05	0.146	1886	0.909	0.854	16171	0.953	-0.138	0.84
KCND2	-5.36	12	-1.05	0.146	1887	0.909	0.854	16170	0.953	-0.044	0.84
FGD1	-5.36	12	-1.05	0.147	1888	0.909	0.853	16169	0.953	-0.059	0.83
MAS1	-5.35	12	-1.05	0.147	1889	0.909	0.853	16168	0.953	-0.102	0.83
ANGEL2	-5.35	12	-1.05	0.147	1890	0.909	0.853	16167	0.953	-0.113	0.83
S100A4	-5.35	12	-1.05	0.147	1891	0.909	0.853	16166	0.953	-0.112	0.83
DENND2A	-5.35	12	-1.05	0.147	1892	0.909	0.853	16165	0.953	0.012	0.83
GRPR	-5.35	12	-1.05	0.147	1893	0.909	0.853	16164	0.953	-0.147	0.83
INHBE	-5.35	12	-1.05	0.147	1894	0.909	0.853	16163	0.953	-0.287	0.83
DPT	-5.34	12	-1.05	0.147	1895	0.909	0.853	16162	0.953	-0.233	0.83
C11orf84	-5.34	12	-1.05	0.147	1896	0.909	0.853	16161	0.953	-0.382	0.83
TRIML2	-5.34	12	-1.05	0.147	1897	0.909	0.853	16160	0.953	-0.07	0.83
SIGLEC6	-5.34	12	-1.05	0.147	1898	0.909	0.853	16159	0.953	0.035	0.83
NCSTN	-5.34	12	-1.05	0.147	1899	0.909	0.853	16158	0.953	-0.177	0.83
YLPM1	-5.34	12	-1.05	0.147	1900	0.909	0.853	16157	0.953	0.033	0.83
PPFIA2	-5.34	12	-1.05	0.147	1901	0.909	0.853	16156	0.953	-0.218	0.83
STAMBP	-5.33	12	-1.05	0.147	1902	0.909	0.853	16155	0.953	-0.292	0.83
TARM1	-5.33	12	-1.05	0.147	1903	0.909	0.853	16154	0.953	-0.189	0.83
ANKRD27	-5.33	12	-1.05	0.147	1904	0.909	0.853	16153	0.953	-0.083	0.83
OPTC	-5.33	12	-1.05	0.147	1905	0.909	0.853	16152	0.953	-0.056	0.83
CAPG	-5.33	12	-1.05	0.148	1906	0.909	0.852	16151	0.953	-0.253	0.83
THBS4	-5.33	12	-1.05	0.148	1907	0.909	0.852	16150	0.953	-0.157	0.83
ETV4	-5.33	12	-1.05	0.148	1908	0.909	0.852	16149	0.953	-0.326	0.83
TACR3	-5.33	12	-1.05	0.148	1909	0.909	0.852	16148	0.953	-0.287	0.83
NUDT18	-2.66	3	-1.05	0.148	1910	0.909	0.852	16147	0.953	-0.256	0.83
DBF4B	-5.33	12	-1.05	0.148	1911	0.909	0.852	16146	0.953	-0.343	0.83
JUNB	-5.33	12	-1.05	0.148	1912	0.909	0.852	16145	0.953	-0.063	0.83
NFATC1	-5.33	12	-1.05	0.148	1913	0.909	0.852	16144	0.953	-0.09	0.83
ORMDL2	-5.33	12	-1.05	0.148	1914	0.909	0.852	16143	0.953	-0.167	0.83
IQGAP2	-5.33	12	-1.05	0.148	1915	0.909	0.852	16142	0.953	-0.224	0.83
ADAMTS13	-5.33	12	-1.05	0.148	1916	0.909	0.852	16141	0.953	-0.065	0.83
PAIP2B	-5.33	12	-1.05	0.148	1917	0.909	0.852	16140	0.953	-0.206	0.83
ZNF639	-5.33	12	-1.05	0.148	1918	0.909	0.852	16139	0.953	-0.201	0.83
DAB2	-5.33	12	-1.05	0.148	1919	0.909	0.852	16138	0.953	-0.305	0.83
PRKRIP1	-5.32	12	-1.05	0.148	1920	0.909	0.852	16137	0.953	-0.2	0.83
IPPK	-5.32	12	-1.05	0.148	1921	0.909	0.852	16136	0.953	-0.133	0.83
RIN3	-5.32	12	-1.04	0.148	1922	0.909	0.852	16135	0.953	-0.135	0.83
CHCHD3	-5.32	12	-1.04	0.148	1923	0.909	0.852	16134	0.953	-0.136	0.83
RBM42	-5.31	12	-1.04	0.148	1924	0.909	0.852	16133	0.953	0.012	0.83
MED12L	-5.31	12	-1.04	0.148	1925	0.909	0.852	16132	0.953	-0.225	0.83
CCDC13	-5.31	12	-1.04	0.148	1926	0.909	0.852	16131	0.953	-0.008	0.83
OTX1	-5.31	12	-1.04	0.148	1927	0.909	0.852	16130	0.953	0.054	0.83
C1orf105	-5.31	12	-1.04	0.148	1928	0.909	0.852	16129	0.953	-0.207	0.83
RAI2	-5.31	12	-1.04	0.148	1929	0.909	0.852	16128	0.953	-0.115	0.83
ZNF215	-5.31	12	-1.04	0.148	1930	0.909	0.852	16127	0.953	-0.178	0.83
RAB2B	-5.31	12	-1.04	0.148	1931	0.909	0.852	16126	0.953	0.034	0.83
NCCRP1	-5.31	12	-1.04	0.149	1932	0.909	0.851	16125	0.953	-0.059	0.83
TEX22	-5.31	12	-1.04	0.149	1933	0.909	0.851	16124	0.953	-0.079	0.83
C12orf10	-5.31	12	-1.04	0.149	1934	0.909	0.851	16123	0.953	-0.149	0.83
GOLGA6L2	-5.31	12	-1.04	0.149	1935	0.909	0.851	16122	0.953	-0.197	0.83
KPNB1	-5.31	12	-1.04	0.149	1936	0.909	0.851	16121	0.953	-0.105	0.83
KPNA7	-5.3	12	-1.04	0.149	1937	0.909	0.851	16120	0.953	-0.086	0.83
PPP1R32	-5.3	12	-1.04	0.149	1938	0.909	0.851	16119	0.953	-0.07	0.83
RPS6KA3	-5.3	12	-1.04	0.149	1939	0.909	0.851	16118	0.953	-0.109	0.83
PIAS3	-5.3	12	-1.04	0.149	1940	0.909	0.851	16117	0.953	0.082	0.83
RAB36	-5.3	12	-1.04	0.149	1941	0.909	0.851	16116	0.953	-0.245	0.83
SETDB2	-5.3	12	-1.04	0.149	1942	0.909	0.851	16115	0.953	-0.1	0.83
DHH	-5.29	12	-1.04	0.149	1943	0.909	0.851	16114	0.953	-0.266	0.83
SERPINB2	-5.29	12	-1.04	0.149	1944	0.909	0.851	16113	0.953	-0.134	0.83
SLC20A2	-5.29	12	-1.04	0.15	1945	0.909	0.85	16112	0.953	-0.177	0.82
SLC35A3	-5.29	12	-1.04	0.15	1946	0.909	0.85	16111	0.953	-0.103	0.82
WNT1	-5.28	12	-1.04	0.15	1947	0.909	0.85	16110	0.953	-0.038	0.82
BTBD9	-5.28	12	-1.04	0.15	1948	0.909	0.85	16109	0.953	-0.132	0.82
PRSS58	-5.28	12	-1.04	0.15	1949	0.909	0.85	16108	0.953	-0.253	0.82
TTC24	-5.28	12	-1.04	0.15	1950	0.909	0.85	16107	0.953	-0.285	0.82
C19orf12	-5.28	12	-1.04	0.15	1951	0.909	0.85	16106	0.953	-0.207	0.82
C6orf223	-5.27	12	-1.04	0.15	1952	0.909	0.85	16105	0.953	-0.228	0.82
DLG2	-5.27	12	-1.04	0.15	1953	0.909	0.85	16104	0.953	-0.186	0.82
SULT1C4	-5.27	12	-1.04	0.15	1954	0.909	0.85	16103	0.953	-0.063	0.82
ITGAE	-5.27	12	-1.03	0.15	1955	0.909	0.85	16102	0.953	-0.337	0.82
RASL10B	-5.26	12	-1.03	0.151	1956	0.909	0.849	16101	0.953	0.166	0.82
UBQLN3	-5.26	12	-1.03	0.151	1957	0.909	0.849	16100	0.953	-0.057	0.82
OR5L2	-5.26	12	-1.03	0.151	1958	0.909	0.849	16099	0.953	-0.273	0.82
DCLRE1B	-5.26	12	-1.03	0.151	1959	0.909	0.849	16098	0.952	-0.01	0.82
C9orf64	-5.26	12	-1.03	0.151	1960	0.909	0.849	16097	0.952	-0.2	0.82
SLC45A3	-5.26	12	-1.03	0.151	1961	0.909	0.849	16096	0.952	-0.165	0.82
POLDIP3	-5.26	12	-1.03	0.151	1962	0.909	0.849	16095	0.952	-0.083	0.82
RFC4	-5.25	12	-1.03	0.151	1963	0.909	0.849	16094	0.952	-0.163	0.82
C8orf46	-5.25	12	-1.03	0.151	1964	0.909	0.849	16093	0.952	-0.089	0.82
TAT	-5.25	12	-1.03	0.151	1965	0.909	0.849	16092	0.952	-0.14	0.82
EVI5	-5.25	12	-1.03	0.151	1966	0.909	0.849	16091	0.952	-0.232	0.82
TACR1	-5.25	12	-1.03	0.151	1967	0.909	0.849	16090	0.952	-0.113	0.82
OR6N1	-5.25	12	-1.03	0.151	1968	0.909	0.849	16089	0.952	-0.179	0.82
TOP3B	-5.25	12	-1.03	0.151	1969	0.909	0.849	16088	0.952	-0.101	0.82
CCDC179	-2.62	3	-1.03	0.151	1970	0.909	0.849	16087	0.952	-0.209	0.82
TTC36	-5.25	12	-1.03	0.151	1971	0.909	0.849	16086	0.952	-0.09	0.82
NDST3	-5.24	12	-1.03	0.151	1972	0.909	0.849	16085	0.952	-0.15	0.82
MEX3B	-5.24	12	-1.03	0.151	1973	0.909	0.849	16084	0.952	-0.189	0.82
CDS1	-5.24	12	-1.03	0.152	1974	0.909	0.848	16083	0.952	-0.037	0.82
LY6G6F	-5.24	12	-1.03	0.152	1975	0.909	0.848	16082	0.952	-0.12	0.82
MSS51	-5.24	12	-1.03	0.152	1976	0.909	0.848	16081	0.952	-0.145	0.82
MAOA	-5.23	12	-1.03	0.152	1977	0.909	0.848	16080	0.952	-0.151	0.82
CCDC144NL	-3.7	6	-1.03	0.152	1978	0.909	0.848	16079	0.952	-0.074	0.82
SOSTDC1	-5.23	12	-1.03	0.152	1979	0.909	0.848	16078	0.952	-0.146	0.82
VANGL1	-5.23	12	-1.03	0.152	1980	0.909	0.848	16077	0.952	-0.207	0.82
REM1	-5.23	12	-1.03	0.152	1981	0.909	0.848	16076	0.952	-0.141	0.82
SLMAP	-5.23	12	-1.03	0.152	1982	0.909	0.848	16075	0.952	-0.287	0.82
CXorf36	-5.23	12	-1.03	0.152	1983	0.909	0.848	16074	0.952	-0.024	0.82
KIF3A	-5.23	12	-1.03	0.152	1984	0.909	0.848	16073	0.952	-0.172	0.82
CR2	-5.22	12	-1.03	0.152	1985	0.909	0.848	16072	0.952	-0.067	0.82
FANK1	-2.61	3	-1.03	0.152	1986	0.909	0.848	16071	0.952	-0.321	0.82
TMBIM4	-5.22	12	-1.03	0.153	1987	0.909	0.847	16070	0.952	-0.111	0.82
BTN1A1	-5.22	12	-1.03	0.153	1988	0.909	0.847	16069	0.952	-0.203	0.82
C2orf53	-5.22	12	-1.03	0.153	1989	0.909	0.847	16068	0.952	-0.115	0.82
RORC	-5.22	12	-1.03	0.153	1990	0.909	0.847	16067	0.952	-0.148	0.82
KLHDC3	-5.22	12	-1.03	0.153	1991	0.909	0.847	16066	0.952	-0.114	0.82
DLGAP4	-5.22	12	-1.03	0.153	1992	0.909	0.847	16065	0.952	-0.034	0.82
TSPAN19	-5.21	12	-1.02	0.153	1993	0.909	0.847	16064	0.952	-0.115	0.82
DYRK4	-5.21	12	-1.02	0.153	1994	0.909	0.847	16063	0.952	0.033	0.82
KIAA0907	-5.21	12	-1.02	0.153	1995	0.909	0.847	16062	0.952	-0.022	0.82
RDH8	-5.2	12	-1.02	0.153	1996	0.909	0.847	16061	0.952	-0.082	0.82
PMF1	-5.2	12	-1.02	0.153	1997	0.909	0.847	16060	0.952	-0.081	0.82
OR1L4	-5.2	12	-1.02	0.153	1998	0.909	0.847	16059	0.952	-0.145	0.82
GK	-5.2	12	-1.02	0.153	1999	0.909	0.847	16058	0.952	-0.217	0.82
[truncated: 16,057 more rows]

## Sheet: Figure 2g
Relative levels of 5-EU intensity normalized to WT
RPE1-iCas9							RPE1-iCas9 ELOF1-KO (2-16)
Exp_1		Exp_2		Exp_3			Exp_1		Exp_2		Exp_3				RPE1-iCas9	Count			Median
Rep_1	Rep_2	Rep_1	Rep_2	Rep_1	Rep_2		Rep_1	Rep_2	Rep_1	Rep_2	Rep_1	Rep_2				Rep_1	Rep_2	Rep_1+2	Rep_1	Rep_2	Rep_1+2	Exp_1+2+3
1.08537	0.784807	1.06141	1.35851	1.13355	0.762225		0.440031	0.350865	0.292525	0.323041	0.405387	0.448945			Exp_1	116	90	206	1.00177	0.971536	0.983465	0.979716
0.83453	0.980045	1.0125	0.881726	0.886615	0.895965		0.382767	0.273318	0.292682	0.296575	0.372971	0.415624			Exp_2	143	144	287	1.04658	0.907055	0.985527
0.955647	0.879001	1.09896	0.851489	0.929749	0.684329		0.501098	0.357935	0.346035	0.351064	0.456309	0.405932			Exp_3	111	100	211	1.14781	0.818358	0.95718
0.922626	0.814057	1.01375	0.859267	0.712675	0.851969		0.451992	0.353684	0.360102	0.376817	0.486265	0.417635
1.01651	0.826711	1.06754	0.927659	0.988955	0.921335		0.668937	0.354272	0.31829	0.291524	0.468083	0.385064			RPE1-iCas9	Count			Median
0.846008	1.00131	1.06981	0.963137	0.843102	1.00923		0.47393	0.360658	0.281851	0.333045	0.369216	0.387449			ELOF1-KO (2-16)	Rep_1	Rep_2	Rep_1+2	Rep_1	Rep_2	Rep_1+2	Exp_1+2+3
0.979386	0.961665	1.12583	0.927557	0.86383	0.885574		0.445434	0.25838	0.386846	0.383313	0.349735	0.419932			Exp_1	130	139	269	0.447272	0.383183	0.411577	0.390225
1.05947	0.850428	1.33255	1.05577	0.865246	0.944466		0.386429	0.35752	0.304564	0.362913	0.540871	0.510041			Exp_2	131	130	261	0.33622	0.362465	0.350459
1.02195	0.929511	1.15191	1.0785	0.953431	1.06004		0.533647	0.348612	0.275529	0.347677	0.37963	0.36636			Exp_3	104	91	195	0.405249	0.420701	0.413431
0.791277	0.933436	1.1002	1.03283	0.728881	0.785514		0.455065	0.275487	0.304114	0.328176	0.486055	0.354366
0.868819	0.883015	1.08813	1.16946	0.863642	1.05311		0.501529	0.21964	0.270189	0.334583	0.526681	0.366907
0.903295	1.00547	1.06022	0.703106	0.794656	1.06077		0.4071	0.265474	0.351871	0.314501	0.466539	0.291728
1.1201	0.76979	1.00884	0.999497	0.954857	0.902668		0.403109	0.404389	0.417687	0.371511	0.35076	0.407017
0.847773	1.06349	1.2896	1.11311	0.863311	0.93682		0.381996	0.251067	0.286544	0.329928	0.477313	0.446691
0.850856	1.01843	1.02824	1.01877	1.0759	0.787938		0.758341	0.350871	0.35591	0.310587	0.233776	0.491177
0.8469	1.05274	1.13118	0.815359	0.905436	0.996587		0.499337	0.303512	0.49333	0.357265	0.37772	0.407219
0.856858	0.963526	1.04115	1.02572	0.945947	0.924041		0.580417	0.376113	0.288737	0.421641	0.410849	0.390495
0.782489	1.01521	1.085	0.856573	1.21496	0.972695		0.480874	0.43071	0.344867	0.327332	0.329993	0.451003
0.953716	1.05517	1.16065	1.11189	0.889735	0.859882		0.552247	0.350667	0.366385	0.48349	0.445472	0.487392
1.16479	1.62457	1.00139	0.904093	0.827491	0.92034		0.422493	0.4186	0.310437	0.321457	0.398902	0.458646
1.17336	0.836553	1.04882	0.890056	1.03165	1.16848		0.537003	0.420921	0.332934	0.400846	0.337238	0.580801
0.826322	0.884095	0.937444	1.20045	1.31313	0.895328		0.398199	0.403396	0.313247	0.373977	0.324513	0.33917
1.4135	0.855715	1.12831	0.841183	0.963702	0.684473		0.455094	0.378982	0.391087	0.400163	0.451817	0.406447
1.07957	0.987486	0.948559	1.54864	0.939171	0.631367		0.380084	0.492518	0.349881	0.434018	0.378609	0.551759
0.981807	0.973448	0.969631	1.05963	1.32558	0.722828		0.525272	0.407329	0.361737	0.427334	0.443862	0.342069
1.25904	1.03614	1.21293	0.911719	1.26134	0.723151		0.50156	0.353789	0.295992	0.420426	0.404946	0.372846
1.04278	0.81554	1.42214	0.962159	1.28217	0.863001		0.380589	0.525107	0.341128	0.344668	0.645478	0.357498
0.990244	0.959427	1.22288	0.916607	1.11952	0.797753		0.451	0.253211	0.427687	0.336156	0.491609	0.567233
1.00636	1.17403	1.18275	1.40223	1.34906	0.805596		0.422847	0.389976	0.364448	0.406104	0.442918	0.50678
1.12001	1.07169	1.22524	0.749895	1.03239	0.732174		0.466418	0.383183	0.365636	0.359979	0.39037	0.499423
0.850956	1.03606	1.05787	0.939102	1.12139	0.971445		0.53032	0.362738	0.373866	0.457601	0.719968	0.471509
1.01499	1.18689	1.16042	0.642803	1.02464	0.876729		0.553002	0.380114	0.404973	0.342876	0.380959	0.504271
1.03202	1.16083	1.03764	0.783774	1.01566	0.877673		0.449037	0.443489	0.449876	0.28392	0.313072	0.625314
1.00267	0.967224	1.2292	0.895163	0.977643	0.66689		0.544464	0.435432	0.340054	0.319174	0.475923	0.506972
1.28559	0.695425	1.17285	0.813395	1.43952	0.802951		0.444308	0.312472	0.543842	0.356375	0.506722	0.43334
1.0084	0.925715	1.12452	0.919481	0.91016	0.890239		0.430883	0.253195	0.415385	0.334726	0.538713	0.457002
1.23705	1.12168	1.19656	1.1063	0.937054	0.803388		0.560057	0.379131	0.295975	0.397031	0.526321	0.477089
0.827919	0.873025	1.29051	0.750954	1.23559	1.01026		0.482874	0.375241	0.375771	0.408839	0.454684	0.479002
0.805799	0.854234	1.44973	0.586614	1.24278	0.752629		0.445508	0.282361	0.404784	0.405466	0.40006	0.435074
1.17289	0.897398	0.784094	0.719329	1.14641	0.948543		0.498617	0.338046	0.351826	0.406567	0.528509	0.464651
0.985641	1.07371	0.941774	0.756639	1.15784	0.859537		0.436453	0.399338	0.465631	0.404567	0.502765	0.489604
1.21215	0.955272	0.995073	0.891306	1.28949	0.840029		0.549374	0.353526	0.387467	0.358386	0.427227	0.447733
1.01656	1.02578	1.06636	0.964523	1.1547	0.847747		0.435668	0.265168	0.36001	0.436146	0.381475	0.558483
0.928545	1.09851	0.918197	0.810247	1.17805	0.714729		0.480529	0.361844	0.439438	0.433134	0.354881	0.588484
1.31599	1.10967	0.985544	0.763569	1.12107	0.82532		0.497717	0.383698	0.396023	0.363713	0.401838	0.454494
0.820144	1.01943	0.852716	0.929502	1.12006	0.844007		0.472225	0.344356	0.362652	0.439157	0.354651	0.542779
1.07689	0.972129	0.97496	0.82718	1.01966	0.818982		0.524464	0.355198	0.323934	0.340898	0.440877	0.536505
1.00088	1.09601	0.889235	1.00274	1.22272	0.875904		0.384101	0.337349	0.442135	0.309218	0.332538	0.472468
0.879773	0.835456	1.1329	0.81923	1.1332	0.825937		0.510496	0.364399	0.383888	0.440818	0.478642	0.63544
1.05413	1.18681	1.09527	0.92546	1.13403	0.779401		0.458723	0.389601	0.356965	0.406172	0.559555	0.420178
0.896125	0.974411	1.10006	0.884471	1.29762	1.09527		0.439008	0.347423	0.631261	0.466285	0.436	0.829491
1.1399	1.05511	1.2913	0.897698	1.31905	0.70804		0.520813	0.41108	0.379823	0.304851	0.493095	0.816599
0.863496	0.980142	0.840475	1.21143	1.11928	0.807438		0.364377	0.404314	0.40736	0.305077	0.410236	0.675864
0.919646	1.1541	1.00774	0.790292	1.08559	0.615969		0.522997	0.414781	0.336892	0.32975	0.364266	0.610451
0.91815	0.907538	1.08201	0.815026	1.22126	0.763832		0.391726	0.435647	0.316889	0.312588	0.458781	0.850689
0.94188	0.610456	1.15449	0.77726	1.04945	0.626143		0.451775	0.457714	0.528996	0.313757	0.370748	0.742717
1.04939	1.07658	0.921555	0.797429	1.17794	0.94034		0.501873	0.397606	0.312571	0.347294	0.281443	0.76185
0.97891	0.836492	1.01123	0.854908	1.15596	0.654783		0.526114	0.369307	0.467703	0.28222	0.351705	0.390336
1.08216	1.07345	0.998678	0.591317	0.991005	0.717501		0.567506	0.415339	0.282532	0.343323	0.433378	0.346818
0.946387	1.13759	0.964477	0.851039	1.17195	0.701957		0.651376	0.337391	0.386135	0.520262	0.21594	0.358004
0.877318	1.36728	0.922274	1.17527	1.33329	0.83189		0.444789	0.481389	0.348998	0.301586	0.430248	0.385779
0.843131	1.04184	1.605	0.865677	1.23036	0.655948		0.493918	0.452875	0.291285	0.350459	0.405112	0.388955
0.86709	1.12973	1.02567	0.928788	1.25491	0.655229		0.634435	0.349446	0.461354	0.42054	0.418215	0.447442
0.95722	0.985123	1.11241	1.1969	1.46745	0.804072		0.505188	0.401999	0.317427	0.449093	0.373993	0.361983
1.10837	1.01577	0.895346	0.985527	1.23076	0.945519		0.600234	0.380904	0.317403	0.385274	0.406315	0.308082
0.934841	0.996396	1.07286	0.822268	1.35793	0.82199		0.550814	0.387119	0.499694	0.340379	0.426809	0.454106
1.14229	0.779878	0.929324	0.9571	1.04837	0.724912		0.432275	0.382474	0.382609	0.413865	0.401983	0.351858
0.929004	1.01663	1.17009	1.02131	1.02028	0.776511		0.450413	0.39932	0.347511	0.338722	0.41845	0.397753
0.896395	0.886271	0.899354	1.35069	1.22214	0.712839		0.328171	0.298491	0.405896	0.412285	0.383344	0.470625
0.908062	0.957952	1.0834	1.01928	1.18642	0.84883		0.39017	0.357343	0.51735	0.413817	0.34775	0.296046
0.953195	0.835505	0.978364	1.03617	1.27702	0.893339		0.413926	0.359524	0.413415	0.401469	0.419819	0.293975
0.914005	0.970943	1.64795	1.05456	1.07658	0.734324		0.529155	0.409203	0.348767	0.479925	0.265858	0.383131
0.78995	0.830352	1.0072	1.09632	1.13866	1.00478		0.521885	0.341882	0.402719	0.372504	0.456268	0.295437
0.963013	1.02575	0.491356	1.09256	1.02262	0.75508		0.405366	0.318522	0.33196	0.431407	0.436716	0.261089
0.937659	1.17327	0.985053	0.908305	1.07847	0.817735		0.536663	0.338445	0.266414	0.317023	0.342925	0.21196
0.966668	0.844413	1.12855	1.49036	0.984673	0.718963		0.442848	0.350447	0.303752	0.397622	0.327808	0.28817
1.0159	1.16415	1.25696	1.2062	1.28204	0.80143		0.43371	0.320609	0.318697	0.362554	0.491314	0.261661
1.06882	0.85314	1.20418	1.16	1.17505	0.887452		0.515455	0.379469	0.300076	0.451284	0.356338	0.226863
0.908711	1.15188	1.44205	0.873527	1.44717	0.791903		0.425754	0.351193	0.394075	0.304026	0.454912	0.49702
0.957129	0.699398	1.71652	0.899369	1.01251	0.95718		0.407271	0.385375	0.335465	0.325027	0.471834	0.33302
0.961467	0.809687	1.07986	0.723181	1.10676	0.765256		0.424988	0.346328	0.218291	0.341734	0.443071	0.438304
1.0333	0.873238	0.984807	0.987599	1.08119	0.855878		0.431878	0.349132	0.417998	0.384902	0.495155	0.407959
1.40036	0.900895	1.25613	0.783101	1.04665	0.729533		0.400634	0.403496	0.347811	0.347999	0.432326	0.420701
1.03285	0.798174	0.965224	0.815416	1.04945	0.617514		0.488518	0.340025	0.277586	0.443943	0.383548	0.376606
0.831219	0.974869	0.896685	0.878877	0.968452	0.70913		0.489207	0.338827	0.317042	0.372541	0.537771	0.455418
0.972157	0.749129	0.69277	1.01479	0.872816	0.723407		0.454109	0.417482	0.279683	0.336971	0.346458	0.329526
1.07961	0.895271	1.00858	0.905805	1.22887	0.82787		0.402781	0.378734	0.304422	0.344648	0.378304	0.501887
1.00658	0.800558	1.33926	1.12012	1.34598	0.814564		0.418468	0.358813	0.313755	0.32888	0.328512	0.275102
0.99876	0.865761	1.15313	0.901429	1.61866	0.65165		0.393368	0.331263	0.280805	0.384063	0.355843	0.335264
1.12296	0.915902	0.814326	0.953355	1.5048	0.708753		0.344656	0.355768	0.33062	0.323102	0.413431	0.374756
1.01837		0.981368	1.4621	1.05472	0.591852		0.435976	0.418964	0.281423	0.33481	0.383541	0.390694
1.13404		1.04573	0.866405	1.33905	1.26469		0.409562	0.343885	0.310111	0.281905	0.330877
1.13485		0.871269	0.870028	1.53945	0.754033		0.44296	0.412359	0.291225	0.292505	0.347449
1.32716		1.19594	1.19976	1.16866	0.890602		0.405645	0.436224	0.269212	0.398025	0.369124
0.914764		1.04658	1.04529	1.42902	0.964939		0.35882	0.387647	0.375745	0.266208	0.398516
0.8136		0.886006	1.33563	1.3239	0.745696		0.333735	0.441679	0.233157	0.315218	0.316373
0.734735		0.78594	1.13302	1.4557	0.743723		0.356512	0.384219	0.398109	0.347049	0.328695
0.896838		0.850346	1.82221	1.17983	1.04848		0.441188	0.406556	0.335125	0.317532	0.382451
1.18802		0.862932	0.901817	1.14781	0.664647		0.359692	0.431573	0.250302	0.36569	0.348346
0.996089		1.01156	1.42341	1.20591	0.835832		0.503789	0.374886	0.369882	0.356522	0.492872
1.00325		0.84067	0.842975	1.66822			0.372784	0.450116	0.310014	0.32975	0.564163
0.999542		0.920184	1.1088	1.47817			0.46083	0.353893	0.324157	0.328111	0.369936
1.16553		0.804016	0.617087	1.25884			0.415746	0.437438	0.355424	0.429366	0.292347
1.37145		0.85579	0.725667	1.24812			0.422218	0.350162	0.322313	0.40705	0.455753
1.05232		1.13011	0.768387	1.55939			0.495382	0.382038	0.371321	0.366403
1.02542		0.994184	0.685025	1.351			0.405224	0.329183	0.44116	0.38109
1.41397		0.955048	0.936133	1.82627			0.407989	0.419079	0.313797	0.353705
1.48694		0.699798	0.585187	1.3394			0.501276	0.46546	0.362482	0.369648
1.31058		0.878792	0.685334	1.30583			0.394338	0.383992	0.272023	0.337953
1.30771		1.0267	0.675104	1.25185			0.451664	0.413788	0.283879	0.441014
1.24122		0.9592	0.755148	1.41679			0.419427	0.379714	0.226579	0.370001
1.13149		1.12868	0.749554				0.456688	0.425799	0.271441	0.334308
1.23022		1.05391	0.767084				0.425516	0.416129	0.299841	0.356171
1.08828		0.95107	0.648831				0.401195	0.386473	0.329915	0.382954
1.52338		0.999926	0.791576				0.420498	0.422919	0.369171	0.457831
1.033		1.26524	1.07738				0.483536	0.351619	0.265357	0.360006
		1.17517	1.07851				0.400398	0.458836	0.281643	0.415436
		1.39882	0.710357				0.506301	0.396006	0.320814	0.362376
		1.12395	0.78169				0.452565	0.457463	0.278915	0.291119
		1.34883	0.703652				0.476919	0.380553	0.36666	0.335256
		0.817045	0.637244				0.359578	0.416185	0.28036	0.364019
		1.13784	0.900724				0.457232	0.410409	0.286487	0.379338
		0.89024	0.666896				0.464496	0.460411	0.251665	0.407615
		0.934187	0.913307				0.419067	0.442626	0.293287	0.523733
		1.02765	1.15648				0.348208	0.390225	0.293802	0.435892
		0.901334	1.08227				0.378895	0.40024	0.371221	0.395409
		1.26576	1.32672				0.39729	0.364141	0.313715	0.338132
		0.784259	0.773117				0.444145	0.396948	0.33622	0.439509
		0.945201	0.734239				0.517359	0.430603	0.412744	0.502886
		1.0655	0.69329				0.434908	0.499563	0.261075	0.364988
		0.988172	0.957141					0.489337	0.284206
		0.736192	0.917871					0.411577
		1.50574	0.888974					0.54284
		1.20724	0.708118					0.397598
		1.16514	0.96927					0.574783
		0.908162	0.950644					0.410432
		1.07439	1.14204					0.448645
		1.16868	0.863174					0.488537
		0.889704	0.913841					0.410367
		1.10358	1.01821
		1.30294	0.749014
		1.07664	1.20382
		1.00098	0.941584
			0.796254
