# Supplementary material for: ELOF1 is a transcription-coupled DNA repair factor that directs RNA polymerase II ubiquitylation
Source: Springer Nature journal article supplement (doi:10.1038/s41556-021-00688-9), 2021-06-01
Supplement: MOESM12 [file 41556_2021_688_MOESM12_ESM.xlsx]

## Sheet: Figure 7a
GENE	sumZ	numObs	normZ	pval_synth	rank_synth	fdr_synth	pval_supp	rank_supp	fdr_supp	Log2_FoldChange	-Log10(p)
MAD2L2	-71.15	12	-13.78	1.7e-43	1	3.07e-39	1	18055	1	-4.932	42.77
GTF2H5	-44.21	12	-8.41	2.02e-17	2	1.82e-13	1	18054	1	-2.456	16.69
RAD9A	-41.74	12	-7.92	1.19e-15	3	7.18e-12	1	18053	1	-2.915	14.92
SPTLC1	-40.43	12	-7.66	9.5e-15	4	4.29e-11	1	18052	1	-2.55	14.02
PDS5A	-39.89	12	-7.55	2.18e-14	5	7.86e-11	1	18051	1	-1.984	13.66
XPC	-33.09	9	-7.22	2.69e-13	6	8.1e-10	1	18050	1	-2.077	12.57
DUT	-37.43	12	-7.06	8.29e-13	7	2.14e-09	1	18049	1	-3.201	12.08
DOLK	-36.77	12	-6.93	2.12e-12	8	4.26e-09	1	18048	1	-2.077	11.67
HUS1	-36.72	12	-6.92	2.27e-12	9	4.26e-09	1	18047	1	-2.056	11.64
PPP2CA	-36.7	12	-6.91	2.36e-12	10	4.26e-09	1	18046	1	-1.785	11.63
ERCC5	-35.71	12	-6.72	9.22e-12	11	1.43e-08	1	18045	1	-1.462	11.04
DDX11	-35.69	12	-6.71	9.49e-12	12	1.43e-08	1	18044	1	-2.988	11.02
RAD1	-35.4	12	-6.66	1.41e-11	13	1.96e-08	1	18043	1	-2.054	10.85
ERCC1	-33.67	12	-6.31	1.39e-10	14	1.8e-07	1	18042	1	-1.367	9.86
TSSC1	-33.43	12	-6.26	1.89e-10	15	2.27e-07	1	18041	1	-1.504	9.72
NSMCE1	-32.74	12	-6.13	4.52e-10	16	5.1e-07	1	18040	1	-2.111	9.34
ACTR6	-32.61	12	-6.1	5.31e-10	17	5.64e-07	1	18039	1	-1.814	9.27
RAD17	-32.01	12	-5.98	1.12e-09	18	1.12e-06	1	18038	1	-1.903	8.95
RFWD3	-31.95	12	-5.97	1.2e-09	19	1.14e-06	1	18037	1	-1.581	8.92
PPP4C	-31.88	12	-5.95	1.31e-09	20	1.18e-06	1	18036	1	-2.285	8.88
GNB1	-31.09	12	-5.8	3.37e-09	22	2.76e-06	1	18034	1	-1.857	8.47
REV3L	-31.11	12	-5.8	3.32e-09	21	2.76e-06	1	18035	1	-1.004	8.48
HIRA	-30.59	12	-5.7	6.08e-09	23	4.77e-06	1	18033	1	-2.199	8.22
VMA21	-30.53	12	-5.69	6.51e-09	24	4.9e-06	1	18032	1	-1.09	8.19
DENR	-30.25	12	-5.63	9.03e-09	25	6.52e-06	1	18031	1	-1.365	8.04
ELOF1	-29.93	12	-5.57	1.3e-08	26	9.05e-06	1	18030	1	-1.617	7.89
XPA	-29.59	12	-5.5	1.92e-08	27	1.29e-05	1	18029	1	-1.685	7.72
GGNBP2	-25.5	9	-5.47	2.26e-08	28	1.46e-05	1	18028	1	-1.506	7.65
PFN1	-29.22	12	-5.42	2.9e-08	29	1.81e-05	1	18027	1	-2.09	7.54
VPS29	-28.95	12	-5.37	3.93e-08	30	2.37e-05	1	18026	1	-2.28	7.41
RTEL1	-28.78	12	-5.34	4.74e-08	31	2.76e-05	1	18025	1	-1.35	7.32
ATP6V0C	-28.45	12	-5.27	6.81e-08	32	3.84e-05	1	18024	1	-3.394	7.17
PDE7A	-25.51	10	-5.17	1.17e-07	33	6.41e-05	1	18023	1	-1.807	6.93
ASCC3	-27.89	12	-5.16	1.24e-07	34	6.57e-05	1	18022	1	-1.047	6.91
KIAA0196	-27.73	12	-5.13	1.47e-07	35	7.6e-05	1	18021	1	-1.515	6.83
TEN1	-27.39	12	-5.06	2.11e-07	36	0.000106	1	18020	1	-1.418	6.68
OTUD5	-26.46	12	-4.87	5.47e-07	37	0.000265	1	18019	1	-1.847	6.26
DOT1L	-26.41	12	-4.86	5.73e-07	39	0.000265	1	18017	1	-1.507	6.24
DSCC1	-26.42	12	-4.87	5.7e-07	38	0.000265	1	18018	1	-1.221	6.24
GNA12	-25.95	12	-4.77	9.08e-07	40	0.00041	1	18016	1	-1.487	6.04
DOHH	-25.79	12	-4.74	1.06e-06	41	0.000463	1	18015	1	-1.833	5.97
TIPRL	-25.78	12	-4.74	1.08e-06	42	0.000463	1	18014	1	-1.78	5.97
PDS5B	-25.51	12	-4.69	1.4e-06	43	0.000587	1	18013	1	-1.3	5.85
ATR	-25.36	12	-4.65	1.62e-06	45	0.000651	1	18011	1	-2.361	5.79
GTF2H4	-25.39	12	-4.66	1.58e-06	44	0.000649	1	18012	1	-2.152	5.8
PAX6	-25.24	12	-4.63	1.82e-06	46	0.000714	1	18010	1	-1.976	5.74
N6AMT1	-25.16	12	-4.62	1.96e-06	48	0.000737	1	18008	1	-1.659	5.71
RAB7A	-25.18	12	-4.62	1.93e-06	47	0.000737	1	18009	1	-1.056	5.71
ATP6V1B2	-25.06	12	-4.59	2.17e-06	49	0.000801	1	18007	1	-2.788	5.66
ARF1	-24.87	12	-4.56	2.6e-06	50	0.000939	1	18006	1	-1.358	5.59
CCDC101	-24.63	12	-4.51	3.24e-06	51	0.00115	1	18005	1	-1.388	5.49
GTF2H1	-24.57	12	-4.5	3.45e-06	52	0.0012	1	18004	1	-2.932	5.46
COMMD4	-24.5	12	-4.48	3.67e-06	53	0.00125	1	18003	1	-1.294	5.44
RIC8A	-24.42	12	-4.47	3.97e-06	54	0.00132	1	18002	1	-1.532	5.4
THAP11	-24.4	12	-4.46	4.03e-06	55	0.00132	1	18001	1	-0.965	5.39
CCNF	-20.79	9	-4.38	5.82e-06	56	0.00188	1	18000	1	-1.215	5.24
SMARCA5	-23.79	12	-4.34	7.07e-06	57	0.00224	1	17999	1	-2.038	5.15
CCDC115	-23.57	12	-4.3	8.65e-06	58	0.00269	1	17998	1	-1.508	5.06
ERCC4	-23.49	12	-4.28	9.25e-06	59	0.00283	1	17997	1	-1.44	5.03
RRM1	-23.37	12	-4.26	1.03e-05	61	0.00302	1	17995	1	-2.41	4.99
RHOA	-23.38	12	-4.26	1.02e-05	60	0.00302	1	17996	1	-1.753	4.99
RAB10	-23.36	12	-4.26	1.04e-05	62	0.00302	1	17994	1	-1.172	4.98
ATP6V1F	-23.3	12	-4.24	1.1e-05	63	0.00314	1	17993	1	-0.917	4.96
XRN1	-23.23	12	-4.23	1.17e-05	64	0.0033	1	17992	1	-1.274	4.93
FBXW11	-23.07	12	-4.2	1.34e-05	65	0.00368	1	17991	1	-1.194	4.87
WDR7	-23.07	12	-4.2	1.34e-05	66	0.00368	1	17990	1	-1.257	4.87
ARHGEF12	-23.03	12	-4.19	1.39e-05	67	0.00374	1	17989	1	-1.017	4.86
PPP2R4	-22.92	12	-4.17	1.53e-05	69	0.004	1	17987	1	-0.979	4.82
CMIP	-22.9	12	-4.17	1.55e-05	70	0.00401	1	17986	1	-1.328	4.81
TRIO	-22.92	12	-4.17	1.53e-05	68	0.004	1	17988	1	-1.074	4.82
MTCH1	-22.88	12	-4.16	1.59e-05	71	0.00404	1	17985	1	-1.066	4.8
MARK3	-22.76	12	-4.14	1.76e-05	72	0.00435	1	17984	1	-1.035	4.75
GPAA1	-22.76	12	-4.14	1.76e-05	73	0.00435	1	17983	1	-1.019	4.75
WRAP53	-22.61	12	-4.11	2e-05	74	0.00489	1	17982	1	-1.337	4.7
ELMO2	-22.56	12	-4.1	2.09e-05	75	0.00504	1	17981	1	-2.005	4.68
HMGCS1	-22.47	12	-4.08	2.25e-05	76	0.00535	1	17980	1	-1.17	4.65
MLLT4	-22.39	12	-4.06	2.43e-05	77	0.00569	1	17979	1	-1.292	4.61
TMEM30A	-22.33	12	-4.05	2.54e-05	78	0.00588	1	17978	1	-1.065	4.6
ANAPC15	-22.31	12	-4.05	2.6e-05	80	0.00588	1	17976	1	-0.649	4.59
RQCD1	-22.31	12	-4.05	2.6e-05	79	0.00588	1	17977	1	-1.306	4.59
RAD51D	-22.28	12	-4.04	2.66e-05	81	0.00593	1	17975	1	-1.745	4.58
BOD1L1	-22.25	12	-4.03	2.73e-05	82	0.00597	1	17974	1	-1.101	4.56
MESDC2	-22.24	12	-4.03	2.74e-05	83	0.00597	1	17973	1	-1.049	4.56
EDC4	-22.18	12	-4.02	2.89e-05	84	0.00621	1	17972	1	-0.905	4.54
ZFP36L1	-22.13	12	-4.01	3.02e-05	85	0.00641	1	17971	1	-1.147	4.52
PPIL2	-22.06	12	-4	3.22e-05	86	0.00676	1	17970	1	-1.942	4.49
GNB1L	-19.07	9	-3.99	3.3e-05	87	0.00686	1	17969	1	-1.342	4.48
SLMAP	-22.01	12	-3.99	3.35e-05	88	0.00688	1	17968	1	-1.354	4.47
MARK2	-21.85	12	-3.96	3.82e-05	89	0.00775	1	17967	1	-0.96	4.42
TDP2	-21.74	12	-3.93	4.2e-05	90	0.00842	1	17966	1	-1.274	4.38
ATP8B1	-21.65	12	-3.92	4.52e-05	91	0.00896	1	17965	1	-1.229	4.34
TLK2	-21.53	12	-3.89	4.97e-05	92	0.00976	1	17964	1	-1.306	4.3
TADA2B	-21.5	12	-3.89	5.08e-05	93	0.00987	1	17963	1	-1.493	4.29
WNK1	-21.41	12	-3.87	5.48e-05	94	0.0105	1	17962	1	-0.979	4.26
HMGCR	-21.4	12	-3.87	5.54e-05	95	0.0105	1	17961	1	-1.786	4.26
MED24	-21.3	12	-3.85	6e-05	97	0.0112	1	17959	1	-1.301	4.22
VPS35	-18.46	9	-3.85	5.95e-05	96	0.0112	1	17960	1	-1.287	4.23
C16orf80	-21.21	12	-3.83	6.46e-05	99	0.0117	1	17957	1	-1.044	4.19
ERCC2	-21.22	12	-3.83	6.42e-05	98	0.0117	1	17958	1	-2.582	4.19
UBA6	-21.21	12	-3.83	6.46e-05	100	0.0117	1	17956	1	-1.036	4.19
TAMM41	-21.13	12	-3.81	6.89e-05	101	0.0122	1	17955	1	-0.846	4.16
GABPB1	-21.13	12	-3.81	6.91e-05	102	0.0122	1	17954	1	-1.625	4.16
NRBP1	-21.02	12	-3.79	7.51e-05	103	0.0132	1	17953	1	-1.215	4.12
SETD2	-20.99	12	-3.78	7.69e-05	104	0.0134	1	17952	1	-1.193	4.11
CDK4	-20.97	12	-3.78	7.86e-05	105	0.0135	1	17951	1	-2.179	4.1
PKMYT1	-20.95	12	-3.78	7.97e-05	106	0.0136	1	17950	1	-1.323	4.1
STUB1	-20.77	12	-3.74	9.17e-05	108	0.0153	1	17948	1	-1.419	4.04
HNRNPU	-20.76	12	-3.74	9.25e-05	109	0.0153	1	17947	1	-2.077	4.03
ATP6V1E1	-20.78	12	-3.74	9.1e-05	107	0.0153	1	17949	1	-1.535	4.04
DDX39B	-20.67	12	-3.72	9.93e-05	110	0.0163	1	17946	1	-1.546	4
PPP2R1A	-20.66	12	-3.72	0.0001	111	0.0163	1	17945	1	-1.411	4
DOLPP1	-20.56	12	-3.7	0.000108	112	0.0175	1	17944	1	-1.338	3.97
PCBP2	-20.5	12	-3.69	0.000114	114	0.018	1	17942	1	-1.05	3.94
PAXIP1	-20.53	12	-3.69	0.000111	113	0.0178	1	17943	1	-1.265	3.95
CCDC22	-20.48	12	-3.68	0.000115	115	0.0181	1	17941	1	-1.259	3.94
BLM	-20.46	12	-3.68	0.000118	116	0.0183	1	17940	1	-0.907	3.93
TAF6L	-20.29	12	-3.64	0.000134	118	0.0206	1	17938	1	-1.403	3.87
YAP1	-20.29	12	-3.64	0.000134	117	0.0206	1	17939	1	-1.212	3.87
VPS45	-20.15	12	-3.62	0.000149	119	0.0227	1	17937	1	-1.309	3.83
VPS52	-20.06	12	-3.6	0.00016	120	0.024	1	17936	1	-1.352	3.8
DHX9	-20.03	12	-3.59	0.000163	121	0.0243	1	17935	1	-1.518	3.79
RSU1	-20.02	12	-3.59	0.000164	122	0.0243	1	17934	1	-1.266	3.79
RAB14	-19.97	12	-3.58	0.000172	124	0.025	1	17932	1	-1.06	3.76
ACTR5	-19.95	12	-3.58	0.000174	125	0.0251	1	17931	1	-1.063	3.76
TRAIP	-20.01	12	-3.59	0.000166	123	0.0244	1	17933	1	-1.539	3.78
PTBP1	-19.87	12	-3.56	0.000185	126	0.0265	1	17930	1	-1.016	3.73
TADA1	-19.84	12	-3.56	0.000189	127	0.0268	1	17929	1	-2.55	3.72
SIK2	-19.83	12	-3.55	0.00019	128	0.0269	1	17928	1	-0.894	3.72
COMMD8	-19.7	12	-3.53	0.00021	130	0.0291	1	17926	1	-0.912	3.68
ASF1A	-19.72	12	-3.53	0.000208	129	0.0291	1	17927	1	-1.091	3.68
COMMD3	-16.82	9	-3.47	0.000258	132	0.0353	1	17924	1	-1.008	3.59
PARVA	-19.48	12	-3.48	0.000249	131	0.0343	1	17925	1	-0.889	3.6
XPO6	-19.42	12	-3.47	0.00026	133	0.0353	1	17923	1	-0.959	3.59
COL4A3BP	-19.37	12	-3.46	0.000268	135	0.0359	1	17921	1	-0.826	3.57
AP1G1	-19.39	12	-3.46	0.000266	134	0.0358	1	17922	1	-1.044	3.58
OTUB1	-19.12	12	-3.41	0.000323	136	0.0429	1	17920	1	-1.089	3.49
OXSM	-19.07	12	-3.4	0.000335	138	0.0439	1	17918	1	-1.069	3.47
LCMT1	-19.1	12	-3.41	0.000327	137	0.0431	1	17919	1	-0.994	3.49
C7orf55-LUC7L2	-18.99	12	-3.38	0.000356	139	0.0463	1	17917	1	-0.733	3.45
COMMD2	-18.84	12	-3.35	0.000397	140	0.0512	1	17916	1	-1.442	3.4
ATP6AP2	-18.8	12	-3.35	0.000407	141	0.0521	1	17915	1	-1.515	3.39
NUP50	-18.72	12	-3.33	0.000433	144	0.0543	1	17912	1	-1.238	3.36
FNTB	-18.73	12	-3.33	0.000428	142	0.0543	1	17914	1	-1.189	3.37
MCPH1	-18.72	12	-3.33	0.000433	143	0.0543	1	17913	1	-1.878	3.36
CABIN1	-18.71	12	-3.33	0.000436	145	0.0543	1	17911	1	-0.829	3.36
DHX35	-18.64	12	-3.32	0.000458	148	0.0559	1	17908	1	-1.162	3.34
ATP6V0B	-18.64	12	-3.32	0.000457	146	0.0559	1	17910	1	-0.985	3.34
COG7	-18.64	12	-3.32	0.000457	147	0.0559	1	17909	1	-0.937	3.34
DPY30	-18.61	12	-3.31	0.000467	149	0.0566	1	17907	1	-0.821	3.33
SIK1	-18.56	12	-3.3	0.000483	150	0.0578	1	17906	1	-1.056	3.32
USP7	-18.56	12	-3.3	0.000485	151	0.0578	1	17905	1	-0.87	3.31
SAMD4B	-18.52	12	-3.29	0.000499	154	0.058	1	17902	1	-1.383	3.3
SRSF11	-18.51	12	-3.29	0.0005	155	0.058	1	17901	1	-1.396	3.3
ATG5	-18.52	12	-3.29	0.000499	153	0.058	1	17903	1	-1.009	3.3
ATP6V1C1	-18.55	12	-3.3	0.000486	152	0.0578	1	17904	1	-1.051	3.31
NELFB	-18.51	12	-3.29	0.000501	156	0.058	0.999	17900	1	-1.835	3.3
REV1	-18.45	12	-3.28	0.000524	157	0.0602	0.999	17899	1	-1.095	3.28
PDAP1	-18.4	12	-3.27	0.00054	160	0.061	0.999	17896	1	-1.248	3.27
MCTS1	-18.43	12	-3.27	0.000531	158	0.0606	0.999	17898	1	-1.517	3.27
NAE1	-18.41	12	-3.27	0.000538	159	0.061	0.999	17897	1	-1.723	3.27
WDHD1	-18.39	12	-3.27	0.000546	161	0.0612	0.999	17895	1	-2.249	3.26
MARS2	-18.37	12	-3.26	0.000555	163	0.0615	0.999	17893	1	-0.858	3.26
GRB2	-18.37	12	-3.26	0.000553	162	0.0615	0.999	17894	1	-1.36	3.26
HDLBP	-18.34	12	-3.26	0.000567	164	0.0624	0.999	17892	1	-0.863	3.25
FTO	-18.3	12	-3.25	0.000581	165	0.0636	0.999	17891	1	-1.545	3.24
ATP6V1H	-18.23	12	-3.23	0.000609	167	0.0658	0.999	17889	1	-1.106	3.22
ATMIN	-18.21	12	-3.23	0.000619	168	0.0662	0.999	17888	1	-0.741	3.21
ALG8	-18.24	12	-3.24	0.000607	166	0.0658	0.999	17890	1	-0.721	3.22
POLA2	-18.18	12	-3.22	0.000631	171	0.0662	0.999	17885	1	-1.059	3.2
NASP	-18.19	12	-3.23	0.000628	170	0.0662	0.999	17886	1	-1.152	3.2
FOXM1	-18.17	12	-3.22	0.000635	173	0.0662	0.999	17883	1	-0.709	3.2
MED23	-18.21	12	-3.23	0.00062	169	0.0662	0.999	17887	1	-0.828	3.21
STK11	-18.18	12	-3.22	0.000633	172	0.0662	0.999	17884	1	-1.542	3.2
CCDC93	-18.12	12	-3.21	0.000659	174	0.0684	0.999	17882	1	-0.752	3.18
RAPGEF1	-17.89	12	-3.17	0.000774	176	0.0792	0.999	17880	1	-1.016	3.11
SETD1A	-17.88	12	-3.16	0.000776	177	0.0792	0.999	17879	1	-1.469	3.11
BARD1	-17.84	12	-3.16	0.000799	178	0.081	0.999	17878	1	-0.999	3.1
UBC	-17.79	12	-3.15	0.000828	179	0.0835	0.999	17877	1	-1.184	3.08
MBD2	-17.75	12	-3.14	0.000849	180	0.0852	0.999	17876	1	-0.902	3.07
DBF4	-17.71	12	-3.13	0.000875	181	0.0873	0.999	17875	1	-1.06	3.06
ZNF574	-17.68	12	-3.12	0.000892	182	0.0881	0.999	17874	1	-0.994	3.05
BIRC6	-17.68	12	-3.12	0.000893	183	0.0881	0.999	17873	1	-0.678	3.05
BRD4	-17.59	12	-3.11	0.000948	184	0.0931	0.999	17872	1	-1.054	3.02
UBE2N	-12.38	6	-3.09	0.000999	185	0.0973	0.999	17871	1	-1.76	3
AP1M1	-17.51	12	-3.09	0.001	186	0.0973	0.999	17870	1	-0.627	3
PGS1	-17.49	12	-3.09	0.00101	187	0.0978	0.999	17869	1	-0.925	3
TRMT61A	-17.48	12	-3.08	0.00102	188	0.098	0.999	17868	1	-1.449	2.99
CSK	-17.41	12	-3.07	0.00107	189	0.102	0.999	17867	1	-0.806	2.97
PSENEN	-17.35	12	-3.06	0.00111	190	0.106	0.999	17866	1	-0.69	2.95
TELO2	-17.3	12	-3.05	0.00115	191	0.108	0.999	17865	1	-1.303	2.94
WDR4	-17.29	12	-3.05	0.00115	192	0.108	0.999	17864	1	-1.193	2.94
PIH1D1	-17.29	12	-3.05	0.00116	193	0.108	0.999	17863	1	-0.941	2.94
ARMC5	-17.27	12	-3.04	0.00117	194	0.109	0.999	17862	1	-1.202	2.93
SUPT4H1	-17.22	12	-3.03	0.00121	195	0.112	0.999	17861	1	-1.962	2.92
VPS51	-17.18	12	-3.03	0.00124	197	0.114	0.999	17859	1	-1.125	2.91
EED	-17.2	12	-3.03	0.00122	196	0.113	0.999	17860	1	-1.32	2.91
UBE2C	-17.14	12	-3.02	0.00128	198	0.116	0.999	17858	1	-0.974	2.89
WWTR1	-17.08	12	-3.01	0.00133	200	0.12	0.999	17856	1	-1.231	2.88
NDNL2	-17.1	12	-3.01	0.00132	199	0.119	0.999	17857	1	-1.922	2.88
MATR3	-17.03	12	-3	0.00137	201	0.123	0.999	17855	1	-1.235	2.86
CBLL1	-17.02	12	-2.99	0.00138	202	0.123	0.999	17854	1	-0.865	2.86
GFM1	-17.02	12	-2.99	0.00138	203	0.123	0.999	17853	1	-0.796	2.86
STT3A	-16.97	12	-2.98	0.00143	204	0.126	0.999	17852	1	-1.101	2.84
PTPN1	-16.87	12	-2.96	0.00153	205	0.134	0.998	17851	1	-1.533	2.82
POLR2I	-16.78	12	-2.95	0.00161	207	0.141	0.998	17849	1	-1.495	2.79
RNASEH2A	-16.8	12	-2.95	0.0016	206	0.14	0.998	17850	1	-0.673	2.8
FDXR	-16.73	12	-2.93	0.00167	208	0.145	0.998	17848	1	-1.301	2.78
NCAPH2	-16.7	12	-2.93	0.0017	209	0.147	0.998	17847	1	-1.142	2.77
PAPD7	-16.67	12	-2.92	0.00173	211	0.148	0.998	17845	1	-0.872	2.76
GNB2	-16.69	12	-2.93	0.00171	210	0.147	0.998	17846	1	-0.802	2.77
CHTF8	-16.64	12	-2.92	0.00176	212	0.15	0.998	17844	1	-0.725	2.75
BPTF	-16.61	12	-2.91	0.0018	213	0.153	0.998	17843	1	-0.672	2.74
RBBP5	-16.6	12	-2.91	0.00181	214	0.153	0.998	17842	1	-1.57	2.74
HDAC3	-16.57	12	-2.9	0.00184	215	0.155	0.998	17841	1	-1.336	2.74
SEC63	-16.5	12	-2.89	0.00193	216	0.162	0.998	17840	1	-1.23	2.71
ZC3H4	-16.46	12	-2.88	0.00199	217	0.165	0.998	17839	1	-0.708	2.7
DNAJC8	-16.45	12	-2.88	0.002	218	0.166	0.998	17838	1	-0.667	2.7
NDE1	-16.38	12	-2.87	0.00208	220	0.17	0.998	17836	1	-0.759	2.68
TOP2B	-16.42	12	-2.87	0.00204	219	0.168	0.998	17837	1	-0.729	2.69
SNRNP40	-16.37	12	-2.86	0.00209	222	0.17	0.998	17834	1	-0.712	2.68
PCSK7	-16.36	12	-2.86	0.00212	223	0.171	0.998	17833	1	-0.689	2.67
NAPG	-16.38	12	-2.87	0.00208	221	0.17	0.998	17835	1	-0.806	2.68
APEX2	-16.34	12	-2.86	0.00213	225	0.171	0.998	17831	1	-0.927	2.67
ICMT	-16.35	12	-2.86	0.00213	224	0.171	0.998	17832	1	-0.748	2.67
SKA2	-16.33	12	-2.86	0.00215	226	0.172	0.998	17830	1	-1.893	2.67
AKAP10	-16.31	12	-2.85	0.00218	227	0.173	0.998	17829	1	-0.849	2.66
AUP1	-16.25	12	-2.84	0.00226	230	0.178	0.998	17826	1	-0.711	2.65
UBIAD1	-16.26	12	-2.84	0.00225	229	0.177	0.998	17827	1	-0.862	2.65
DTX2	-16.26	12	-2.84	0.00225	228	0.177	0.998	17828	1	-0.58	2.65
RABL5	-16.23	12	-2.84	0.00229	231	0.179	0.998	17825	1	-0.81	2.64
ATRX	-16.2	12	-2.83	0.00234	232	0.182	0.998	17824	1	-1.43	2.63
KHSRP	-16.16	12	-2.82	0.00239	233	0.185	0.998	17823	1	-0.915	2.62
CERS2	-16.12	12	-2.81	0.00244	235	0.188	0.998	17821	1	-0.866	2.61
PPP6C	-16.13	12	-2.81	0.00244	234	0.188	0.998	17822	1	-1.506	2.61
NDOR1	-16.09	12	-2.81	0.00249	237	0.19	0.998	17819	1	-1.575	2.6
DHX29	-16.12	12	-2.81	0.00245	236	0.188	0.998	17820	1	-0.733	2.61
ATXN7L3	-16.06	12	-2.8	0.00254	238	0.193	0.997	17818	1	-0.795	2.6
MEN1	-16	12	-2.79	0.00263	239	0.199	0.997	17817	1	-0.827	2.58
HAUS8	-15.96	12	-2.78	0.0027	241	0.202	0.997	17815	1	-0.662	2.57
UFC1	-15.95	12	-2.78	0.00273	243	0.202	0.997	17813	1	-0.939	2.56
PIK3C3	-15.98	12	-2.79	0.00266	240	0.2	0.997	17816	1	-1.231	2.58
TXNL4B	-15.95	12	-2.78	0.00272	242	0.202	0.997	17814	1	-1.688	2.57
TMEM199	-15.94	12	-2.78	0.00273	244	0.202	0.997	17812	1	-0.773	2.56
MIDN	-15.9	12	-2.77	0.00281	245	0.207	0.997	17811	1	-0.8	2.55
RAB3GAP2	-15.87	12	-2.76	0.00287	246	0.21	0.997	17810	1	-0.702	2.54
OPA1	-15.82	12	-2.75	0.00295	247	0.216	0.997	17809	1	-0.778	2.53
SLC35A2	-15.75	12	-2.74	0.00308	248	0.224	0.997	17808	1	-1.188	2.51
PFDN5	-15.73	12	-2.74	0.00311	249	0.226	0.997	17807	1	-1.671	2.51
GNA13	-15.68	12	-2.73	0.00321	250	0.232	0.997	17806	1	-0.795	2.49
RBBP4	-15.65	12	-2.72	0.00326	251	0.235	0.997	17805	1	-1.289	2.49
UVRAG	-15.62	12	-2.71	0.00332	252	0.237	0.997	17804	1	-0.748	2.48
SNX27	-15.61	12	-2.71	0.00334	255	0.237	0.997	17801	1	-0.878	2.48
PKN2	-15.62	12	-2.71	0.00333	254	0.237	0.997	17802	1	-1.033	2.48
MARCH6	-15.62	12	-2.71	0.00332	253	0.237	0.997	17803	1	-0.817	2.48
CXXC1	-15.59	12	-2.71	0.00338	256	0.238	0.997	17800	1	-0.766	2.47
KMT2A	-15.56	12	-2.7	0.00344	257	0.242	0.997	17799	1	-1.24	2.46
PPIE	-15.51	12	-2.69	0.00356	264	0.244	0.996	17792	1	-0.989	2.45
SPTLC2	-15.54	12	-2.7	0.00349	258	0.243	0.997	17798	1	-1.037	2.46
SNRPD1	-15.53	12	-2.7	0.00351	260	0.243	0.996	17796	1	-1.527	2.45
FEN1	-15.53	12	-2.69	0.00352	261	0.243	0.996	17795	1	-1.471	2.45
UBE2S	-15.54	12	-2.7	0.0035	259	0.243	0.997	17797	1	-0.701	2.46
HUWE1	-15.52	12	-2.69	0.00354	263	0.243	0.996	17793	1	-1.584	2.45
ZFP36L2	-15.48	12	-2.69	0.00361	268	0.244	0.996	17788	1	-0.619	2.44
MFN2	-15.49	12	-2.69	0.0036	266	0.244	0.996	17790	1	-1.172	2.44
MGEA5	-15.52	12	-2.69	0.00354	262	0.243	0.996	17794	1	-0.681	2.45
INO80B	-15.47	12	-2.68	0.00365	269	0.245	0.996	17787	1	-0.638	2.44
MOCS3	-15.49	12	-2.69	0.0036	267	0.244	0.996	17789	1	-1.927	2.44
USP37	-15.44	12	-2.68	0.0037	271	0.246	0.996	17785	1	-0.594	2.43
VARS2	-15.49	12	-2.69	0.00359	265	0.244	0.996	17791	1	-0.701	2.44
WASL	-15.44	12	-2.68	0.00371	272	0.246	0.996	17784	1	-0.701	2.43
VHL	-15.46	12	-2.68	0.00367	270	0.245	0.996	17786	1	-1.276	2.44
TOE1	-15.38	12	-2.67	0.00384	273	0.254	0.996	17783	1	-0.52	2.42
HSP90B1	-15.37	12	-2.66	0.00387	274	0.255	0.996	17782	1	-0.992	2.41
PPIL1	-15.36	12	-2.66	0.00389	275	0.255	0.996	17781	1	-1.051	2.41
EPC1	-15.35	12	-2.66	0.0039	276	0.255	0.996	17780	1	-0.769	2.41
GEMIN4	-15.33	12	-2.66	0.00395	277	0.257	0.996	17779	1	-1.115	2.4
BRCA1	-15.3	12	-2.65	0.00403	279	0.26	0.996	17777	1	-0.632	2.39
MED15	-15.3	12	-2.65	0.00403	280	0.26	0.996	17776	1	-1.272	2.39
SUDS3	-15.27	12	-2.64	0.0041	281	0.263	0.996	17775	1	-0.57	2.39
QRSL1	-15.3	12	-2.65	0.00403	278	0.26	0.996	17778	1	-0.746	2.39
WDR24	-15.26	12	-2.64	0.00411	282	0.263	0.996	17774	1	-1.156	2.39
GUK1	-15.19	12	-2.63	0.00428	285	0.271	0.996	17771	1	-0.826	2.37
UBR5	-15.23	12	-2.64	0.00419	284	0.266	0.996	17772	1	-1.507	2.38
RAD51B	-15.24	12	-2.64	0.00418	283	0.266	0.996	17773	1	-0.588	2.38
EXOC2	-15.17	12	-2.62	0.00434	286	0.274	0.996	17770	1	-1.087	2.36
IPO5	-15.16	12	-2.62	0.00437	288	0.274	0.996	17768	1	-0.768	2.36
SMC6	-15.16	12	-2.62	0.00436	287	0.274	0.996	17769	1	-1.684	2.36
FBRS	-15.14	12	-2.62	0.00441	289	0.275	0.996	17767	1	-1.069	2.36
EAPP	-15.08	12	-2.61	0.00458	291	0.284	0.995	17765	1	-1.071	2.34
MPDU1	-15.1	12	-2.61	0.00453	290	0.282	0.995	17766	1	-0.593	2.34
TNKS2	-15.07	12	-2.6	0.00461	292	0.285	0.995	17764	1	-0.819	2.34
STAG2	-15.05	12	-2.6	0.00465	293	0.287	0.995	17763	1	-0.637	2.33
BRPF1	-14.93	12	-2.58	0.00498	296	0.304	0.995	17760	1	-0.663	2.3
SPEN	-14.9	12	-2.57	0.00507	298	0.306	0.995	17758	1	-1.114	2.29
AASDHPPT	-14.9	12	-2.57	0.00509	300	0.306	0.995	17756	1	-1.355	2.29
CTNNBL1	-14.95	12	-2.58	0.00494	294	0.302	0.995	17762	1	-0.963	2.31
MCM9	-14.95	12	-2.58	0.00494	295	0.302	0.995	17761	1	-0.783	2.31
AKIRIN1	-14.9	12	-2.57	0.00508	299	0.306	0.995	17757	1	-0.678	2.29
CTDNEP1	-14.93	12	-2.58	0.005	297	0.304	0.995	17759	1	-1.666	2.3
YTHDF2	-14.85	12	-2.56	0.00521	301	0.313	0.995	17755	1	-0.738	2.28
UBE2M	-14.83	12	-2.56	0.00529	302	0.316	0.995	17754	1	-0.489	2.28
BAZ1B	-14.81	12	-2.55	0.00536	304	0.318	0.995	17752	1	-0.604	2.27
ZMYM4	-14.81	12	-2.55	0.00533	303	0.318	0.995	17753	1	-0.665	2.27
PPP2R5C	-14.79	12	-2.55	0.00541	305	0.32	0.995	17751	1	-0.616	2.27
CHIC2	-14.75	12	-2.54	0.00552	306	0.325	0.994	17750	1	-0.57	2.26
MOB4	-14.75	12	-2.54	0.00553	307	0.325	0.994	17749	1	-1.056	2.26
GABARAP	-14.7	12	-2.53	0.00569	308	0.333	0.994	17748	1	-0.861	2.24
HARS2	-14.7	12	-2.53	0.0057	309	0.333	0.994	17747	1	-0.695	2.24
AIP	-14.69	12	-2.53	0.00574	310	0.334	0.994	17746	1	-0.821	2.24
ARPC3	-14.65	12	-2.52	0.00586	311	0.338	0.994	17745	1	-1.664	2.23
POC1A	-14.65	12	-2.52	0.00586	312	0.338	0.994	17744	1	-0.591	2.23
ATRIP	-14.62	12	-2.51	0.00595	314	0.342	0.994	17742	1	-0.852	2.23
ARL1	-14.61	12	-2.51	0.006	316	0.343	0.994	17740	1	-0.804	2.22
PQBP1	-14.62	12	-2.51	0.00596	315	0.342	0.994	17741	1	-0.601	2.22
CPSF6	-13.97	11	-2.51	0.00606	317	0.344	0.994	17739	1	-1.11	2.22
SNUPN	-14.65	12	-2.52	0.00586	313	0.338	0.994	17743	1	-0.764	2.23
DNLZ	-14.58	12	-2.51	0.00608	319	0.344	0.994	17737	1	-0.905	2.22
HAUS3	-14.54	12	-2.5	0.00625	321	0.352	0.994	17735	1	-1.001	2.2
ATP6V1A	-13.93	11	-2.5	0.00621	320	0.35	0.994	17736	1	-2.348	2.21
FANCI	-14.59	12	-2.51	0.00606	318	0.344	0.994	17738	1	-0.652	2.22
FAM3A	-14.48	12	-2.49	0.00644	323	0.36	0.994	17733	1	-0.799	2.19
MSL3	-14.49	12	-2.49	0.00639	322	0.358	0.994	17734	1	-0.855	2.19
ZMAT5	-13.85	11	-2.48	0.00649	324	0.362	0.994	17732	1	-1.353	2.19
HSCB	-14.41	12	-2.47	0.0067	326	0.371	0.993	17730	1	-1.791	2.17
THOC6	-14.43	12	-2.48	0.00664	325	0.369	0.993	17731	1	-0.561	2.18
KLF10	-14.4	12	-2.47	0.00675	327	0.373	0.993	17729	1	-0.675	2.17
DNTTIP1	-14.38	12	-2.47	0.00681	328	0.375	0.993	17728	1	-0.613	2.17
RBM4	-14.33	12	-2.46	0.00702	329	0.386	0.993	17727	1	-0.712	2.15
SUPT20H	-14.28	12	-2.45	0.0072	331	0.392	0.993	17725	1	-0.813	2.14
MMS22L	-12.35	9	-2.44	0.00727	334	0.392	0.993	17722	1	-0.83	2.14
AXL	-14.27	12	-2.45	0.00724	333	0.392	0.993	17723	1	-0.676	2.14
FANCD2	-14.26	12	-2.44	0.00728	335	0.392	0.993	17721	1	-0.911	2.14
NAA25	-14.28	12	-2.45	0.0072	332	0.392	0.993	17724	1	-1.671	2.14
SNAP29	-14.29	12	-2.45	0.00718	330	0.392	0.993	17726	1	-0.598	2.14
C9orf78	-14.22	12	-2.43	0.00747	337	0.4	0.993	17719	1	-0.679	2.13
CYFIP1	-14.22	12	-2.44	0.00744	336	0.4	0.993	17720	1	-1.041	2.13
RHOG	-14.19	12	-2.43	0.00756	338	0.404	0.992	17718	1	-0.684	2.12
SUPT7L	-14.17	12	-2.43	0.00764	339	0.407	0.992	17717	1	-0.861	2.12
KPNB1	-14.15	12	-2.42	0.00773	340	0.411	0.992	17716	1	-1.67	2.11
KAT6A	-14.11	12	-2.41	0.00791	342	0.418	0.992	17714	1	-0.721	2.1
AAAS	-14.12	12	-2.42	0.00785	341	0.416	0.992	17715	1	-0.205	2.11
RPN2	-14.08	12	-2.41	0.00803	345	0.42	0.992	17711	1	-1.013	2.1
BRD2	-14.09	12	-2.41	0.00799	344	0.419	0.992	17712	1	-0.705	2.1
TOMM40	-14.05	12	-2.4	0.00819	348	0.424	0.992	17708	1	-1.329	2.09
CIAO1	-14.04	12	-2.4	0.0082	349	0.424	0.992	17707	1	-1.263	2.09
CNOT1	-14.05	12	-2.4	0.00818	347	0.424	0.992	17709	1	-0.867	2.09
SCAI	-14	12	-2.39	0.00841	353	0.43	0.992	17703	1	-0.713	2.08
NAA20	-13.44	11	-2.4	0.00823	350	0.425	0.992	17706	1	-2.417	2.08
FUBP3	-14	12	-2.39	0.00838	352	0.43	0.992	17704	1	-0.67	2.08
PAN2	-13.99	12	-2.39	0.00843	354	0.43	0.992	17702	1	-0.673	2.07
TCEB2	-14.1	12	-2.41	0.00795	343	0.419	0.992	17713	1	-1.536	2.1
CMTR1	-14.01	12	-2.39	0.00836	351	0.43	0.992	17705	1	-1.007	2.08
DPH1	-13.98	12	-2.39	0.00848	355	0.43	0.992	17701	1	-0.631	2.07
YPEL5	-14.06	12	-2.4	0.00815	346	0.424	0.992	17710	1	-0.531	2.09
UFL1	-13.98	12	-2.39	0.00848	356	0.43	0.992	17700	1	-0.756	2.07
PARS2	-13.96	12	-2.38	0.00859	359	0.432	0.991	17697	1	-0.531	2.07
NONO	-13.97	12	-2.38	0.00854	357	0.432	0.991	17699	1	-0.747	2.07
NEB	-13.95	12	-2.38	0.00861	360	0.432	0.991	17696	1	-0.855	2.06
MGRN1	-13.96	12	-2.38	0.00857	358	0.432	0.991	17698	1	-0.73	2.07
EGLN1	-13.91	12	-2.37	0.0088	361	0.439	0.991	17695	1	-0.935	2.06
ARHGEF28	-13.9	12	-2.37	0.00885	363	0.439	0.991	17693	1	-0.724	2.05
RNASEK	-13.91	12	-2.37	0.00881	362	0.439	0.991	17694	1	-0.597	2.06
MRPS7	-13.9	12	-2.37	0.00886	364	0.439	0.991	17692	1	-0.546	2.05
ACSL3	-13.86	12	-2.36	0.00904	366	0.446	0.991	17690	1	-0.7	2.04
TMEM57	-13.87	12	-2.37	0.009	365	0.445	0.991	17691	1	-0.658	2.05
EIF4H	-13.86	12	-2.36	0.00907	367	0.446	0.991	17689	1	-0.705	2.04
TBC1D10B	-13.8	12	-2.35	0.00934	371	0.454	0.991	17685	1	-0.749	2.03
RNF4	-13.83	12	-2.36	0.00921	368	0.452	0.991	17688	1	-0.512	2.04
NPEPPS	-13.82	12	-2.36	0.00924	369	0.452	0.991	17687	1	-0.605	2.03
PIGT	-13.81	12	-2.35	0.00929	370	0.454	0.991	17686	1	-0.575	2.03
RTCB	-13.75	12	-2.34	0.0096	376	0.46	0.99	17680	1	-2.192	2.02
POLR2K	-11.93	9	-2.35	0.00949	372	0.46	0.991	17684	1	-1.047	2.02
INTS6	-13.76	12	-2.34	0.00957	373	0.46	0.99	17683	1	-1.261	2.02
MVK	-13.17	11	-2.34	0.00959	375	0.46	0.99	17681	1	-0.526	2.02
PTPRS	-13.75	12	-2.34	0.0096	377	0.46	0.99	17679	1	-0.58	2.02
LIMS1	-13.74	12	-2.34	0.00968	378	0.461	0.99	17678	1	-1.045	2.01
HGS	-13.76	12	-2.34	0.00957	374	0.46	0.99	17682	1	-1.296	2.02
DDX6	-13.74	12	-2.34	0.00968	379	0.461	0.99	17677	1	-1.551	2.01
ZMYND8	-13.72	12	-2.33	0.00978	380	0.465	0.99	17676	1	-0.73	2.01
SETD3	-13.68	12	-2.33	0.00999	383	0.471	0.99	17673	1	-0.526	2
PDE3A	-13.7	12	-2.33	0.00984	381	0.467	0.99	17675	1	-0.78	2.01
MRPL4	-13.68	12	-2.33	0.00998	382	0.471	0.99	17674	1	-0.756	2
TMEM151A	-13.62	12	-2.32	0.0103	386	0.479	0.99	17670	1	-0.22	1.99
NUFIP2	-13.62	12	-2.32	0.0103	387	0.479	0.99	17669	1	-0.88	1.99
MTA2	-13.63	12	-2.32	0.0103	385	0.479	0.99	17671	1	-0.734	1.99
ACTR8	-13.64	12	-2.32	0.0102	384	0.479	0.99	17672	1	-0.436	1.99
REXO1	-13.61	12	-2.31	0.0104	390	0.48	0.99	17666	1	-0.723	1.98
RBM33	-13.59	12	-2.31	0.0105	391	0.483	0.99	17665	1	-0.685	1.98
PTPRJ	-13.61	12	-2.31	0.0103	389	0.479	0.99	17667	1	-0.503	1.99
PRIMPOL	-13.59	12	-2.31	0.0105	392	0.483	0.99	17664	1	-0.495	1.98
LPAR1	-13.62	12	-2.31	0.0103	388	0.479	0.99	17668	1	-0.924	1.99
LUC7L3	-13.56	12	-2.3	0.0106	393	0.489	0.989	17663	1	-1.457	1.97
ADAT2	-11.71	9	-2.3	0.0108	394	0.496	0.989	17662	1	-0.575	1.97
TRIM37	-13.5	12	-2.29	0.011	395	0.502	0.989	17661	1	-0.594	1.96
SUZ12	-13.45	12	-2.28	0.0113	396	0.515	0.989	17660	1	-0.882	1.95
MEMO1	-13.4	12	-2.27	0.0116	399	0.523	0.988	17657	1	-0.549	1.94
SLC38A2	-13.4	12	-2.27	0.0116	398	0.523	0.988	17658	1	-0.633	1.94
WASF2	-13.4	12	-2.27	0.0116	400	0.523	0.988	17656	1	-1.016	1.94
TOMM20	-13.41	12	-2.27	0.0115	397	0.523	0.988	17659	1	-0.911	1.94
B4GALT5	-13.38	12	-2.27	0.0117	401	0.525	0.988	17655	1	-0.537	1.93
GMPPB	-11.57	9	-2.26	0.0118	402	0.531	0.988	17654	1	-0.224	1.93
DDX42	-13.33	12	-2.26	0.012	405	0.535	0.988	17651	1	-0.569	1.92
NCSTN	-13.33	12	-2.26	0.012	403	0.535	0.988	17653	1	-1.232	1.92
EXOC7	-13.33	12	-2.26	0.012	404	0.535	0.988	17652	1	-0.547	1.92
EIF5A	-9.42	6	-2.26	0.012	406	0.535	0.988	17650	1	-1.492	1.92
DPM1	-13.28	12	-2.25	0.0123	410	0.543	0.988	17646	1	-0.574	1.91
SMARCD1	-13.29	12	-2.25	0.0122	407	0.542	0.988	17649	1	-0.618	1.91
TEAD3	-13.28	12	-2.25	0.0123	409	0.542	0.988	17647	1	-0.665	1.91
ZNHIT1	-13.26	12	-2.24	0.0124	411	0.545	0.988	17645	1	-0.342	1.91
ATP6AP1	-13.21	12	-2.23	0.0127	414	0.554	0.987	17642	1	-0.39	1.9
PALB2	-13.23	12	-2.24	0.0126	412	0.553	0.987	17644	1	-0.691	1.9
CRKL	-13.21	12	-2.23	0.0127	415	0.554	0.987	17641	1	-0.962	1.9
ZCCHC11	-13.22	12	-2.24	0.0127	413	0.554	0.987	17643	1	-0.677	1.9
SGMS1	-13.19	12	-2.23	0.0129	416	0.558	0.987	17640	1	-0.593	1.89
FGD1	-13.13	12	-2.22	0.0133	417	0.575	0.987	17639	1	-0.575	1.88
RBM14	-13.12	12	-2.22	0.0133	418	0.575	0.987	17638	1	-0.704	1.88
TGFBRAP1	-13.12	12	-2.22	0.0134	419	0.575	0.987	17637	1	-0.756	1.87
VPS53	-13.11	12	-2.21	0.0134	420	0.575	0.987	17636	1	-0.769	1.87
BCAR1	-13.06	12	-2.2	0.0138	428	0.579	0.986	17628	1	-0.687	1.86
SRSF7	-13.11	12	-2.21	0.0134	421	0.575	0.987	17635	1	-0.821	1.87
PRSS27	-13.1	12	-2.21	0.0135	423	0.575	0.987	17633	1	-0.549	1.87
VPS8	-13.11	12	-2.21	0.0134	422	0.575	0.987	17634	1	-0.487	1.87
HECTD1	-13.05	12	-2.2	0.0138	430	0.579	0.986	17626	1	-0.677	1.86
IWS1	-11.31	9	-2.2	0.0137	426	0.579	0.986	17630	1	-0.339	1.86
MED26	-13.07	12	-2.21	0.0137	425	0.579	0.986	17631	1	-1.362	1.86
HSPA8	-13.08	12	-2.21	0.0136	424	0.579	0.986	17632	1	-0.989	1.87
ARPC4	-13.05	12	-2.2	0.0138	429	0.579	0.986	17627	1	-1.706	1.86
RBM6	-13.06	12	-2.2	0.0138	427	0.579	0.986	17629	1	-0.493	1.86
LDLR	-13.05	12	-2.2	0.0138	431	0.579	0.986	17625	1	-0.727	1.86
VPS16	-13.05	12	-2.2	0.0139	432	0.579	0.986	17624	1	-0.635	1.86
COMMD10	-13.03	12	-2.2	0.014	433	0.581	0.986	17623	1	-0.821	1.85
ECHS1	-13.03	12	-2.2	0.014	434	0.581	0.986	17622	1	-0.616	1.85
MRGBP	-13	12	-2.19	0.0142	435	0.589	0.986	17621	1	-0.485	1.85
CDH2	-12.95	12	-2.18	0.0146	441	0.597	0.985	17615	1	-1.158	1.84
TUFM	-12.97	12	-2.19	0.0144	437	0.593	0.986	17619	1	-0.561	1.84
SUB1	-11.23	9	-2.18	0.0145	439	0.593	0.986	17617	1	-0.731	1.84
ARFGEF2	-12.96	12	-2.18	0.0145	440	0.593	0.986	17616	1	-0.44	1.84
WDR83	-12.97	12	-2.19	0.0144	438	0.593	0.986	17618	1	-1.057	1.84
COMMD5	-12.97	12	-2.19	0.0144	436	0.593	0.986	17620	1	-1.239	1.84
STRADA	-12.94	12	-2.18	0.0146	442	0.598	0.985	17614	1	-0.59	1.84
ATG10	-12.93	12	-2.18	0.0147	443	0.598	0.985	17613	1	-0.686	1.83
AIFM1	-12.91	12	-2.17	0.0149	444	0.604	0.985	17612	1	-0.855	1.83
MYO1C	-12.9	12	-2.17	0.0149	445	0.606	0.985	17611	1	-0.68	1.83
NUP214	-12.89	12	-2.17	0.015	446	0.607	0.985	17610	1	-0.911	1.82
ENY2	-12.87	12	-2.17	0.0152	448	0.611	0.985	17608	1	-0.551	1.82
PRKRIP1	-12.88	12	-2.17	0.0151	447	0.611	0.985	17609	1	-0.703	1.82
SMAD4	-12.86	12	-2.16	0.0152	449	0.612	0.985	17607	1	-0.556	1.82
SRSF5	-12.83	12	-2.16	0.0154	452	0.617	0.985	17604	1	-0.535	1.81
RANBP1	-12.84	12	-2.16	0.0154	451	0.617	0.985	17605	1	-0.818	1.81
SAMD4A	-12.85	12	-2.16	0.0153	450	0.613	0.985	17606	1	-0.638	1.82
STRAP	-12.8	12	-2.15	0.0157	453	0.624	0.984	17603	1	-1.017	1.8
SEC61B	-12.8	12	-2.15	0.0157	454	0.625	0.984	17602	1	-0.583	1.8
SUPT3H	-12.77	12	-2.15	0.016	456	0.632	0.984	17600	1	-0.984	1.8
OBFC1	-12.78	12	-2.15	0.0158	455	0.629	0.984	17601	1	-1.042	1.8
SLX4	-12.75	12	-2.14	0.0161	457	0.636	0.984	17599	1	-0.892	1.79
UBAP2L	-12.73	12	-2.14	0.0163	461	0.638	0.984	17595	1	-0.852	1.79
CWC25	-12.71	12	-2.13	0.0164	463	0.639	0.984	17593	1	-0.551	1.79
C17orf70	-12.74	12	-2.14	0.0162	459	0.637	0.984	17597	1	-0.593	1.79
MLLT1	-12.74	12	-2.14	0.0162	458	0.637	0.984	17598	1	-0.66	1.79
YBX1	-12.73	12	-2.14	0.0162	460	0.637	0.984	17596	1	-0.704	1.79
TAF2	-12.71	12	-2.13	0.0164	464	0.639	0.984	17592	1	-1.156	1.79
CDK2	-12.7	12	-2.13	0.0165	465	0.639	0.984	17591	1	-0.712	1.78
ERBB2	-12.71	12	-2.13	0.0164	462	0.639	0.984	17594	1	-0.541	1.79
PSME3	-12.7	12	-2.13	0.0165	466	0.639	0.984	17590	1	-0.623	1.78
ARPC5	-12.67	12	-2.13	0.0168	467	0.647	0.983	17589	1	-0.566	1.77
SMNDC1	-12.67	12	-2.13	0.0168	468	0.647	0.983	17588	1	-0.633	1.77
COG8	-12.6	12	-2.11	0.0174	473	0.661	0.983	17583	1	-0.539	1.76
TULP4	-12.63	12	-2.12	0.0171	469	0.659	0.983	17587	1	-0.735	1.77
ILK	-10.92	9	-2.11	0.0172	470	0.661	0.983	17586	1	-0.693	1.76
ADAT3	-12.61	12	-2.11	0.0173	471	0.661	0.983	17585	1	-0.731	1.76
DNAJC9	-12.6	12	-2.11	0.0173	472	0.661	0.983	17584	1	-0.878	1.76
KDSR	-12.04	11	-2.11	0.0176	479	0.661	0.982	17577	1	-0.716	1.75
CHAF1A	-12.59	12	-2.11	0.0174	474	0.661	0.983	17582	1	-0.769	1.76
PPP2R3C	-12.59	12	-2.11	0.0175	476	0.661	0.983	17580	1	-0.607	1.76
ATP5B	-12.58	12	-2.11	0.0175	477	0.661	0.982	17579	1	-0.626	1.76
PXK	-12.57	12	-2.11	0.0176	481	0.661	0.982	17575	1	-0.55	1.75
TAF5L	-12.57	12	-2.11	0.0176	480	0.661	0.982	17576	1	-2.069	1.75
UBR4	-12.58	12	-2.11	0.0176	478	0.661	0.982	17578	1	-0.736	1.75
RECQL5	-12.56	12	-2.1	0.0177	482	0.661	0.982	17574	1	-0.378	1.75
ACTN1	-12.59	12	-2.11	0.0174	475	0.661	0.983	17581	1	-0.584	1.76
PDCD5	-12.55	12	-2.1	0.0178	484	0.664	0.982	17572	1	-0.636	1.75
NUP160	-12.55	12	-2.1	0.0177	483	0.663	0.982	17573	1	-1.556	1.75
SLC7A6OS	-12.51	12	-2.09	0.0181	485	0.675	0.982	17571	1	-1.885	1.74
C1orf74	-12.49	12	-2.09	0.0183	486	0.68	0.982	17570	1	-0.753	1.74
UGCG	-12.46	12	-2.08	0.0186	489	0.684	0.981	17567	1	-0.683	1.73
PAGR1	-12.48	12	-2.09	0.0184	487	0.683	0.982	17569	1	-0.524	1.74
HAUS5	-12.46	12	-2.08	0.0186	488	0.684	0.981	17568	1	-0.97	1.73
ATRN	-12.46	12	-2.08	0.0186	490	0.684	0.981	17566	1	-0.423	1.73
MAU2	-12.4	12	-2.07	0.0191	497	0.694	0.981	17559	1	-0.702	1.72
SRSF6	-12.43	12	-2.08	0.0189	492	0.692	0.981	17564	1	-0.787	1.72
ATG7	-12.42	12	-2.08	0.019	494	0.692	0.981	17562	1	-0.627	1.72
NUDCD3	-12.44	12	-2.08	0.0187	491	0.689	0.981	17565	1	-1.108	1.73
PAN3	-12.42	12	-2.08	0.019	495	0.692	0.981	17561	1	-0.848	1.72
CHD9	-12.42	12	-2.08	0.019	493	0.692	0.981	17563	1	-0.799	1.72
ARID4B	-12.41	12	-2.07	0.0191	496	0.694	0.981	17560	1	-0.413	1.72
DOCK5	-12.38	12	-2.07	0.0193	503	0.694	0.981	17553	1	-0.67	1.71
ARL4C	-12.39	12	-2.07	0.0192	499	0.694	0.981	17557	1	-0.663	1.72
CTNNA1	-12.38	12	-2.07	0.0193	501	0.694	0.981	17555	1	-0.652	1.71
OIP5	-12.39	12	-2.07	0.0193	500	0.694	0.981	17556	1	-1.155	1.71
CLCC1	-12.37	12	-2.07	0.0194	505	0.694	0.981	17551	1	-0.673	1.71
CSNK2A1	-10.71	9	-2.07	0.0194	504	0.694	0.981	17552	1	-0.607	1.71
MCM2	-12.37	12	-2.07	0.0194	506	0.694	0.981	17550	1	-1.793	1.71
PPA1	-12.38	12	-2.07	0.0193	502	0.694	0.981	17554	1	-1.339	1.71
WDR5	-12.39	12	-2.07	0.0192	498	0.694	0.981	17558	1	-1.183	1.72
XRCC2	-12.33	12	-2.06	0.0198	508	0.703	0.98	17548	1	-0.608	1.7
NHLRC2	-12.34	12	-2.06	0.0197	507	0.701	0.98	17549	1	-0.841	1.71
TXNDC17	-12.31	12	-2.05	0.0199	511	0.705	0.98	17545	1	-0.803	1.7
CLASP2	-12.32	12	-2.06	0.0199	510	0.704	0.98	17546	1	-0.55	1.7
PLXNB2	-12.32	12	-2.06	0.0199	509	0.704	0.98	17547	1	-0.581	1.7
RNASEH2B	-12.26	12	-2.04	0.0205	514	0.719	0.98	17542	1	-0.463	1.69
PDPK1	-12.27	12	-2.05	0.0204	512	0.718	0.98	17544	1	-0.849	1.69
ZW10	-12.24	12	-2.04	0.0207	518	0.722	0.979	17538	1	-1.076	1.68
TAPT1	-12.26	12	-2.04	0.0204	513	0.719	0.98	17543	1	-0.615	1.69
KIF18A	-12.25	12	-2.04	0.0206	516	0.721	0.979	17540	1	-1.307	1.69
EDC3	-12.25	12	-2.04	0.0206	515	0.721	0.979	17541	1	-0.593	1.69
RRM2	-12.23	12	-2.04	0.0208	520	0.722	0.979	17536	1	-0.912	1.68
RARS2	-12.23	12	-2.04	0.0208	519	0.722	0.979	17537	1	-0.624	1.68
ASNS	-12.21	12	-2.03	0.021	521	0.728	0.979	17535	1	-0.584	1.68
LSM10	-12.24	12	-2.04	0.0207	517	0.722	0.979	17539	1	-1.39	1.68
DRAP1	-12.18	12	-2.03	0.0212	522	0.734	0.979	17534	1	-1.625	1.67
MMS19	-12.16	12	-2.02	0.0215	523	0.742	0.978	17533	1	-0.682	1.67
PTK2	-12.13	12	-2.02	0.0218	524	0.751	0.978	17532	1	-1.362	1.66
TUSC2	-12.12	12	-2.02	0.0219	525	0.754	0.978	17531	1	-0.734	1.66
TOX4	-12.08	12	-2.01	0.0223	528	0.761	0.978	17528	1	-0.213	1.65
PTPMT1	-12.1	12	-2.01	0.0221	526	0.757	0.978	17530	1	-0.887	1.66
SKA1	-12.09	12	-2.01	0.0222	527	0.761	0.978	17529	1	-1.605	1.65
GTF2F1	-12.02	12	-2	0.0229	531	0.778	0.977	17525	1	-0.762	1.64
COIL	-12.03	12	-2	0.0228	530	0.777	0.977	17526	1	-0.494	1.64
VPS54	-12.04	12	-2	0.0227	529	0.776	0.977	17527	1	-0.616	1.64
KLHDC3	-12.02	12	-2	0.023	532	0.779	0.977	17524	1	-0.697	1.64
UBALD2	-12	12	-1.99	0.0232	533	0.786	0.977	17523	1	-0.681	1.63
INTS8	-11.97	12	-1.99	0.0234	534	0.793	0.977	17522	1	-0.985	1.63
DICER1	-11.93	12	-1.98	0.0239	537	0.801	0.976	17519	1	-0.799	1.62
RBM17	-11.93	12	-1.98	0.0239	536	0.801	0.976	17520	1	-0.699	1.62
MKL1	-11.94	12	-1.98	0.0238	535	0.801	0.976	17521	1	-0.745	1.62
AKAP9	-11.93	12	-1.98	0.024	540	0.801	0.976	17516	1	-0.719	1.62
DSTYK	-11.9	12	-1.97	0.0243	543	0.807	0.976	17513	1	-0.366	1.61
KIF3A	-11.93	12	-1.98	0.0239	538	0.801	0.976	17518	1	-0.628	1.62
ZC3HC1	-11.93	12	-1.98	0.024	539	0.801	0.976	17517	1	-0.717	1.62
GNB2L1	-11.91	12	-1.97	0.0241	541	0.806	0.976	17515	1	-1.346	1.62
ARHGDIA	-11.9	12	-1.97	0.0242	542	0.807	0.976	17514	1	-0.666	1.62
ERCC6L	-11.89	12	-1.97	0.0243	544	0.807	0.976	17512	1	-0.753	1.61
C14orf166	-11.85	12	-1.96	0.0249	548	0.82	0.975	17508	1	-1.004	1.6
DCPS	-11.88	12	-1.97	0.0245	545	0.812	0.975	17511	1	-0.54	1.61
PPME1	-11.84	12	-1.96	0.025	549	0.82	0.975	17507	1	-0.808	1.6
SARNP	-11.82	12	-1.96	0.0252	554	0.822	0.975	17502	1	-0.789	1.6
CYB5R4	-11.85	12	-1.96	0.0249	547	0.82	0.975	17509	1	-0.598	1.6
TAF3	-11.82	12	-1.96	0.0252	552	0.822	0.975	17504	1	-0.944	1.6
KCMF1	-11.84	12	-1.96	0.025	550	0.82	0.975	17506	1	-1.173	1.6
MCM8	-11.83	12	-1.96	0.0251	551	0.822	0.975	17505	1	-0.528	1.6
CLTC	-11.82	12	-1.96	0.0252	553	0.822	0.975	17503	1	-0.881	1.6
IPO9	-11.85	12	-1.96	0.0248	546	0.82	0.975	17510	1	-0.619	1.61
PRPF39	-11.81	12	-1.95	0.0253	555	0.824	0.975	17501	1	-0.493	1.6
RAE1	-11.77	12	-1.95	0.0258	556	0.838	0.974	17500	1	-0.889	1.59
SMC3	-11.75	12	-1.94	0.026	557	0.843	0.974	17499	1	-1.703	1.59
PDCL	-11.72	12	-1.94	0.0264	560	0.85	0.974	17496	1	-1.123	1.58
TM2D3	-11.74	12	-1.94	0.0262	559	0.845	0.974	17497	1	-0.558	1.58
SMPDL3B	-11.74	12	-1.94	0.0261	558	0.844	0.974	17498	1	-0.812	1.58
TRNAU1AP	-11.69	12	-1.93	0.0268	562	0.861	0.973	17494	1	-0.674	1.57
FARS2	-11.7	12	-1.93	0.0267	561	0.858	0.973	17495	1	-0.509	1.57
LONP1	-11.67	12	-1.93	0.027	563	0.865	0.973	17493	1	-1	1.57
AES	-11.64	12	-1.92	0.0274	565	0.875	0.973	17491	1	-0.784	1.56
PI4KB	-11.65	12	-1.92	0.0273	564	0.873	0.973	17492	1	-0.628	1.56
BTBD3	-11.62	12	-1.92	0.0276	567	0.878	0.972	17489	1	-0.432	1.56
INO80	-11.64	12	-1.92	0.0274	566	0.875	0.973	17490	1	-0.725	1.56
PSMG2	-11.61	12	-1.92	0.0277	568	0.882	0.972	17488	1	-0.562	1.56
SETDB1	-11.61	12	-1.91	0.0278	569	0.882	0.972	17487	1	-0.746	1.56
NEDD9	-11.58	12	-1.91	0.0281	572	0.887	0.972	17484	1	-0.695	1.55
TFB2M	-11.6	12	-1.91	0.0279	570	0.884	0.972	17486	1	-0.602	1.55
PRRC2A	-11.58	12	-1.91	0.0281	571	0.887	0.972	17485	1	-0.622	1.55
FDX1L	-11.58	12	-1.91	0.0282	573	0.887	0.972	17483	1	-1.534	1.55
RAD50	-11.56	12	-1.91	0.0284	575	0.889	0.972	17481	1	-1.049	1.55
SMC2	-11.58	12	-1.91	0.0282	574	0.887	0.972	17482	1	-1.056	1.55
OXA1L	-11.56	12	-1.9	0.0284	576	0.889	0.972	17480	1	-0.537	1.55
PSME4	-11.55	12	-1.9	0.0285	579	0.889	0.971	17477	1	-0.589	1.55
BRIP1	-11.53	12	-1.9	0.0288	582	0.891	0.971	17474	1	-0.757	1.54
FAM122A	-11.56	12	-1.9	0.0284	577	0.889	0.972	17479	1	-0.497	1.55
METTL1	-11.56	12	-1.9	0.0285	578	0.889	0.972	17478	1	-0.341	1.55
TNS3	-11.53	12	-1.9	0.0288	583	0.891	0.971	17473	1	-0.498	1.54
MLST8	-11.54	12	-1.9	0.0286	580	0.89	0.971	17476	1	-1.003	1.54
THG1L	-11.53	12	-1.9	0.0288	584	0.891	0.971	17472	1	-1.253	1.54
ZNF598	-11.53	12	-1.9	0.0288	581	0.891	0.971	17475	1	-0.452	1.54
ARHGEF7	-11.48	12	-1.89	0.0294	590	0.899	0.971	17466	1	-0.62	1.53
CREB1	-11.49	12	-1.89	0.0294	589	0.899	0.971	17467	1	-0.609	1.53
PRRC2C	-11.49	12	-1.89	0.0293	588	0.899	0.971	17468	1	-0.538	1.53
SRRD	-11.5	12	-1.89	0.0291	586	0.898	0.971	17470	1	-1.118	1.54
TOP3A	-11.52	12	-1.9	0.0289	585	0.892	0.971	17471	1	-0.958	1.54
MRP63	-11.5	12	-1.89	0.0292	587	0.898	0.971	17469	1	-0.631	1.53
KAT6B	-11.45	12	-1.88	0.0298	592	0.91	0.97	17464	1	-0.598	1.53
ITGB5	-10.97	11	-1.88	0.0298	591	0.91	0.97	17465	1	-2.354	1.53
SNRK	-11.45	12	-1.88	0.0299	593	0.911	0.97	17463	1	-0.472	1.52
DNAJC11	-9.91	9	-1.88	0.03	594	0.912	0.97	17462	1	-0.541	1.52
NICN1	-11.42	12	-1.88	0.0302	597	0.914	0.97	17459	1	-0.482	1.52
EWSR1	-11.42	12	-1.88	0.0303	598	0.914	0.97	17458	1	-0.347	1.52
CRK	-11.43	12	-1.88	0.0301	595	0.913	0.97	17461	1	-0.611	1.52
CSF3	-11.38	12	-1.87	0.0308	604	0.914	0.969	17452	1	-0.772	1.51
INTS3	-11.42	12	-1.88	0.0302	596	0.914	0.97	17460	1	-1.451	1.52
SAE1	-11.4	12	-1.87	0.0306	599	0.914	0.969	17457	1	-0.781	1.51
GSG2	-11.39	12	-1.87	0.0307	601	0.914	0.969	17455	1	-0.51	1.51
PIGL	-11.39	12	-1.87	0.0307	603	0.914	0.969	17453	1	-0.629	1.51
HEATR2	-11.37	12	-1.87	0.0309	607	0.914	0.969	17449	1	-0.421	1.51
RNF8	-11.37	12	-1.87	0.0309	605	0.914	0.969	17451	1	-0.534	1.51
HES4	-11.37	12	-1.87	0.0309	606	0.914	0.969	17450	1	-0.419	1.51
GEMIN7	-11.39	12	-1.87	0.0307	602	0.914	0.969	17454	1	-1.621	1.51
DOCK7	-11.35	12	-1.86	0.0312	609	0.914	0.969	17447	1	-0.475	1.51
ORC4	-11.39	12	-1.87	0.0306	600	0.914	0.969	17456	1	-0.952	1.51
CHMP5	-11.36	12	-1.86	0.0312	608	0.914	0.969	17448	1	-0.912	1.51
DNM2	-11.35	12	-1.86	0.0312	610	0.914	0.969	17446	1	-1.099	1.51
SUPV3L1	-11.31	12	-1.86	0.0318	612	0.914	0.968	17444	1	-0.695	1.5
CDK6	-11.34	12	-1.86	0.0314	611	0.914	0.969	17445	1	-0.597	1.5
RPS6KB1	-11.3	12	-1.85	0.0319	613	0.914	0.968	17443	1	-0.629	1.5
CCNB1	-11.3	12	-1.85	0.032	614	0.914	0.968	17442	1	-0.513	1.49
MRPS18A	-11.3	12	-1.85	0.032	615	0.914	0.968	17441	1	-0.498	1.49
NFKBIE	-11.27	12	-1.85	0.0324	616	0.914	0.968	17440	1	-0.583	1.49
DTYMK	-11.26	12	-1.84	0.0326	618	0.914	0.967	17438	1	-0.433	1.49
RAB21	-11.27	12	-1.85	0.0324	617	0.914	0.968	17439	1	-0.502	1.49
VCL	-11.25	12	-1.84	0.0327	619	0.914	0.967	17437	1	-0.363	1.49
XPO7	-11.2	12	-1.83	0.0335	624	0.914	0.967	17432	1	-0.525	1.47
KIFAP3	-11.22	12	-1.84	0.0331	620	0.914	0.967	17436	1	-0.64	1.48
USP19	-11.22	12	-1.84	0.0332	621	0.914	0.967	17435	1	-0.616	1.48
MKL2	-11.21	12	-1.84	0.0332	622	0.914	0.967	17434	1	-0.344	1.48
METAP2	-11.19	12	-1.83	0.0336	625	0.914	0.966	17431	1	-0.745	1.47
RPAP1	-11.16	12	-1.83	0.034	629	0.914	0.966	17427	1	-1.067	1.47
BTAF1	-11.2	12	-1.83	0.0334	623	0.914	0.967	17433	1	-1.121	1.48
TBCA	-10.69	11	-1.83	0.0339	627	0.914	0.966	17429	1	-2.457	1.47
HSBP1	-11.17	12	-1.83	0.0338	626	0.914	0.966	17430	1	-0.493	1.47
ATP6V0D1	-11.15	12	-1.82	0.0342	630	0.914	0.966	17426	1	-0.699	1.47
UBLCP1	-11.17	12	-1.83	0.0339	628	0.914	0.966	17428	1	-0.493	1.47
OR3A1	-11.14	12	-1.82	0.0344	631	0.914	0.966	17425	1	-0.519	1.46
EPN1	-11.1	12	-1.81	0.0349	635	0.914	0.965	17421	1	-0.699	1.46
DNAJA2	-11.1	12	-1.81	0.0349	634	0.914	0.965	17422	1	-0.552	1.46
LIG4	-11.12	12	-1.82	0.0347	632	0.914	0.965	17424	1	-0.551	1.46
CENPA	-11.09	12	-1.81	0.0351	637	0.914	0.965	17419	1	-0.67	1.45
SIVA1	-11.1	12	-1.81	0.0349	633	0.914	0.965	17423	1	-0.584	1.46
LAT	-11.09	12	-1.81	0.0351	636	0.914	0.965	17420	1	-0.554	1.45
FNDC3B	-11.07	12	-1.81	0.0353	638	0.914	0.965	17418	1	-0.502	1.45
RAD51C	-11.06	12	-1.8	0.0356	639	0.914	0.964	17417	1	-0.728	1.45
C10orf76	-11.03	12	-1.8	0.036	641	0.914	0.964	17415	0.999	-0.541	1.44
RPS6KA3	-11.03	12	-1.8	0.0359	640	0.914	0.964	17416	0.999	-0.697	1.44
CLUH	-10.98	12	-1.79	0.0368	643	0.914	0.963	17413	0.999	-0.613	1.43
PPP1CA	-10.96	12	-1.79	0.037	646	0.914	0.963	17410	0.999	-0.418	1.43
ATP6V1G1	-10.97	12	-1.79	0.037	645	0.914	0.963	17411	0.999	-0.767	1.43
MED19	-10.54	11	-1.79	0.0364	642	0.914	0.964	17414	0.999	-1.397	1.44
DR1	-10.97	12	-1.79	0.0369	644	0.914	0.963	17412	0.999	-1.011	1.43
FANCA	-10.96	12	-1.79	0.0371	647	0.914	0.963	17409	0.999	-0.49	1.43
ACTR1B	-10.95	12	-1.78	0.0373	648	0.914	0.963	17408	0.998	-0.359	1.43
NSMCE2	-10.94	12	-1.78	0.0374	649	0.914	0.963	17407	0.998	-1.242	1.43
KDM5C	-10.92	12	-1.78	0.0377	650	0.914	0.962	17406	0.998	-0.578	1.42
CTNNB1	-10.9	12	-1.77	0.0381	653	0.914	0.962	17403	0.998	-0.45	1.42
CYHR1	-10.9	12	-1.77	0.0381	652	0.914	0.962	17404	0.998	-0.506	1.42
TPBGL	-10.88	12	-1.77	0.0383	655	0.914	0.962	17401	0.998	-0.547	1.42
CENPE	-10.85	12	-1.76	0.0389	658	0.914	0.961	17398	0.997	-0.563	1.41
IMPDH2	-10.87	12	-1.77	0.0386	656	0.914	0.961	17400	0.998	-0.803	1.41
SCYL1	-10.92	12	-1.78	0.0378	651	0.914	0.962	17405	0.998	-0.59	1.42
ALG6	-10.89	12	-1.77	0.0382	654	0.914	0.962	17402	0.998	-0.86	1.42
UBE2J2	-10.84	12	-1.76	0.0391	660	0.914	0.961	17396	0.997	-0.688	1.41
AMFR	-10.84	12	-1.76	0.0392	661	0.914	0.961	17395	0.997	-0.577	1.41
ARMCX3	-10.85	12	-1.76	0.039	659	0.914	0.961	17397	0.997	-0.78	1.41
EPS8L3	-10.86	12	-1.77	0.0387	657	0.914	0.961	17399	0.998	-0.656	1.41
DPH2	-10.8	12	-1.75	0.0398	665	0.914	0.96	17391	0.997	-0.328	1.4
GCM2	-10.81	12	-1.75	0.0397	663	0.914	0.96	17393	0.997	-0.47	1.4
TARS2	-10.82	12	-1.76	0.0394	662	0.914	0.961	17394	0.997	-0.45	1.4
NELFCD	-10.81	12	-1.75	0.0397	664	0.914	0.96	17392	0.997	-0.627	1.4
AHCTF1	-10.8	12	-1.75	0.0398	667	0.914	0.96	17389	0.997	-0.649	1.4
AKAP13	-10.8	12	-1.75	0.0398	666	0.914	0.96	17390	0.997	-0.695	1.4
CDC25B	-10.8	12	-1.75	0.0398	668	0.914	0.96	17388	0.997	-0.754	1.4
MAP2K5	-10.78	12	-1.75	0.0401	670	0.914	0.96	17386	0.997	-0.478	1.4
NINJ2	-10.78	12	-1.75	0.0401	671	0.914	0.96	17385	0.997	-0.253	1.4
GID8	-10.74	12	-1.74	0.0408	680	0.914	0.959	17376	0.997	-0.511	1.39
ZRANB2	-10.76	12	-1.75	0.0404	676	0.914	0.96	17380	0.997	-0.645	1.39
PRPF4	-10.77	12	-1.75	0.0403	674	0.914	0.96	17382	0.997	-1.311	1.39
ATP6V1D	-10.79	12	-1.75	0.0399	669	0.914	0.96	17387	0.997	-0.759	1.4
BNC2	-10.77	12	-1.75	0.0403	675	0.914	0.96	17381	0.997	-0.702	1.39
UBE4B	-10.77	12	-1.75	0.0402	672	0.914	0.96	17384	0.997	-0.552	1.4
COASY	-10.77	12	-1.75	0.0403	673	0.914	0.96	17383	0.997	-0.444	1.39
MRPL38	-10.75	12	-1.74	0.0407	679	0.914	0.959	17377	0.997	-0.753	1.39
EXOC8	-10.75	12	-1.74	0.0406	678	0.914	0.959	17378	0.997	-0.432	1.39
FAM98A	-10.71	12	-1.74	0.0413	682	0.914	0.959	17374	0.996	-0.476	1.38
POLD3	-10.26	11	-1.74	0.0412	681	0.914	0.959	17375	0.996	-1.126	1.39
PEG10	-10.7	12	-1.73	0.0415	683	0.914	0.958	17373	0.996	-0.505	1.38
TRAF2	-10.76	12	-1.75	0.0405	677	0.914	0.96	17379	0.997	-0.55	1.39
IK	-10.68	12	-1.73	0.0418	685	0.914	0.958	17371	0.996	-0.883	1.38
CETN2	-10.68	12	-1.73	0.0419	686	0.914	0.958	17370	0.996	-0.594	1.38
MRPS26	-10.68	12	-1.73	0.042	687	0.914	0.958	17369	0.996	-0.701	1.38
RARS	-10.7	12	-1.73	0.0416	684	0.914	0.958	17372	0.996	-1.388	1.38
PIGN	-10.67	12	-1.73	0.042	688	0.914	0.958	17368	0.996	-0.324	1.38
PPIH	-10.66	12	-1.73	0.0422	689	0.914	0.958	17367	0.996	-0.553	1.37
EPC2	-10.62	12	-1.72	0.0429	690	0.914	0.957	17366	0.995	-0.534	1.37
AP2M1	-10.6	12	-1.71	0.0434	697	0.914	0.957	17359	0.995	-0.423	1.36
POLE4	-10.61	12	-1.72	0.0431	692	0.914	0.957	17364	0.995	-0.476	1.37
HAUS1	-9.19	9	-1.71	0.0432	695	0.914	0.957	17361	0.995	-0.675	1.36
PAQR8	-10.61	12	-1.72	0.0431	691	0.914	0.957	17365	0.995	-0.557	1.37
EMC1	-10.61	12	-1.72	0.0431	693	0.914	0.957	17363	0.995	-0.579	1.37
DYNC1LI2	-10.61	12	-1.72	0.0431	694	0.914	0.957	17362	0.995	-0.442	1.37
CFDP1	-10.58	12	-1.71	0.0437	700	0.914	0.956	17356	0.995	-0.633	1.36
MVD	-10.6	12	-1.71	0.0434	696	0.914	0.957	17360	0.995	-0.572	1.36
NPC1	-10.58	12	-1.71	0.0436	699	0.914	0.956	17357	0.995	-0.442	1.36
DDA1	-10.59	12	-1.71	0.0435	698	0.914	0.957	17358	0.995	-0.425	1.36
C21orf2	-10.57	12	-1.71	0.0438	701	0.914	0.956	17355	0.995	-0.648	1.36
PRDM10	-10.57	12	-1.71	0.0438	702	0.914	0.956	17354	0.995	-0.594	1.36
MRPL27	-10.54	12	-1.7	0.0443	703	0.914	0.956	17353	0.994	-0.45	1.35
PIGA	-10.51	12	-1.7	0.045	712	0.914	0.955	17344	0.994	-0.551	1.35
TIPARP	-10.53	12	-1.7	0.0445	705	0.914	0.955	17351	0.994	-0.968	1.35
METAP1	-10.52	12	-1.7	0.0449	709	0.914	0.955	17347	0.994	-0.553	1.35
FUS	-10.54	12	-1.7	0.0444	704	0.914	0.956	17352	0.994	-0.499	1.35
HDAC2	-10.53	12	-1.7	0.0445	706	0.914	0.955	17350	0.994	-0.455	1.35
C16orf62	-10.52	12	-1.7	0.0447	707	0.914	0.955	17349	0.994	-0.452	1.35
EIF4A1	-10.51	12	-1.7	0.0449	711	0.914	0.955	17345	0.994	-0.971	1.35
VAPA	-9.09	9	-1.69	0.0453	713	0.914	0.955	17343	0.994	-0.87	1.34
BUB1	-10.51	12	-1.7	0.0449	710	0.914	0.955	17346	0.994	-0.521	1.35
C10orf2	-10.48	12	-1.69	0.0456	715	0.914	0.954	17341	0.994	-0.31	1.34
BCLAF1	-10.47	12	-1.69	0.0458	716	0.914	0.954	17340	0.994	-0.771	1.34
LYPLA2	-10.49	12	-1.69	0.0454	714	0.914	0.955	17342	0.994	-0.469	1.34
IFNLR1	-10.46	12	-1.69	0.0458	717	0.914	0.954	17339	0.994	-0.481	1.34
MRPL2	-10.46	12	-1.68	0.046	718	0.914	0.954	17338	0.993	-0.528	1.34
ELAVL1	-10.43	12	-1.68	0.0466	721	0.914	0.953	17335	0.993	-0.479	1.33
TAF8	-10.44	12	-1.68	0.0464	719	0.914	0.954	17337	0.993	-0.807	1.33
CNOT3	-10.4	12	-1.67	0.047	726	0.914	0.953	17330	0.993	-0.088	1.33
EZR	-10.43	12	-1.68	0.0465	720	0.914	0.953	17336	0.993	-0.324	1.33
WIBG	-10.41	12	-1.68	0.0469	724	0.914	0.953	17332	0.993	-0.656	1.33
EPN3	-10.39	12	-1.67	0.0473	728	0.914	0.953	17328	0.993	-0.503	1.33
MIS18A	-9.02	9	-1.68	0.0468	722	0.914	0.953	17334	0.993	-0.405	1.33
FLYWCH1	-10.4	12	-1.67	0.0472	727	0.914	0.953	17329	0.993	-0.592	1.33
ELP2	-10.41	12	-1.68	0.0469	723	0.914	0.953	17333	0.993	-0.819	1.33
ZNF318	-10.4	12	-1.67	0.047	725	0.914	0.953	17331	0.993	-0.673	1.33
NAT6	-10.37	12	-1.67	0.0477	730	0.914	0.952	17326	0.992	-0.524	1.32
KLF1	-10.37	12	-1.67	0.0477	731	0.914	0.952	17325	0.992	-0.939	1.32
GTF2H3	-10.38	12	-1.67	0.0476	729	0.914	0.952	17327	0.992	-0.819	1.32
PPWD1	-10.37	12	-1.67	0.0477	732	0.914	0.952	17324	0.992	-1	1.32
UBE2H	-10.36	12	-1.67	0.0478	733	0.914	0.952	17323	0.992	-0.574	1.32
UXT	-10.36	12	-1.67	0.0479	735	0.914	0.952	17321	0.992	-0.884	1.32
LARS2	-10.36	12	-1.67	0.0478	734	0.914	0.952	17322	0.992	-0.489	1.32
TAF13	-10.35	12	-1.66	0.0482	736	0.914	0.952	17320	0.992	-0.82	1.32
ZBTB8OS	-9.9	11	-1.66	0.0482	737	0.914	0.952	17319	0.992	-1.261	1.32
SKP2	-10.34	12	-1.66	0.0483	739	0.914	0.952	17317	0.992	-0.444	1.32
DHX16	-10.32	12	-1.66	0.0487	742	0.914	0.951	17314	0.992	-0.725	1.31
RABIF	-10.34	12	-1.66	0.0483	738	0.914	0.952	17318	0.992	-0.782	1.32
MARK4	-10.33	12	-1.66	0.0486	740	0.914	0.951	17316	0.992	-0.526	1.31
ARPC2	-10.3	12	-1.65	0.049	744	0.914	0.951	17312	0.992	-0.796	1.31
MTMR9	-10.32	12	-1.66	0.0486	741	0.914	0.951	17315	0.992	-0.606	1.31
ABHD11	-10.32	12	-1.66	0.0488	743	0.914	0.951	17313	0.992	-0.622	1.31
LZTS2	-10.29	12	-1.65	0.0493	745	0.914	0.951	17311	0.992	-0.503	1.31
FBXO6	-10.28	12	-1.65	0.0494	747	0.914	0.951	17309	0.992	-0.315	1.31
ARCN1	-10.29	12	-1.65	0.0494	746	0.914	0.951	17310	0.992	-0.566	1.31
ZNF638	-10.28	12	-1.65	0.0494	748	0.914	0.951	17308	0.992	-0.407	1.31
SRRM1	-10.25	12	-1.64	0.05	752	0.914	0.95	17304	0.991	-0.652	1.3
COG6	-10.27	12	-1.65	0.0497	749	0.914	0.95	17307	0.991	-0.67	1.3
DCTN4	-10.26	12	-1.65	0.05	751	0.914	0.95	17305	0.991	-0.727	1.3
THUMPD1	-10.25	12	-1.64	0.0501	753	0.914	0.95	17303	0.991	-0.535	1.3
TCEB3	-10.27	12	-1.65	0.0498	750	0.914	0.95	17306	0.991	-0.504	1.3
POC1B	-10.25	12	-1.64	0.0501	754	0.914	0.95	17302	0.991	-0.505	1.3
FBXW8	-10.22	12	-1.64	0.0507	758	0.914	0.949	17298	0.991	-0.497	1.29
UNC119	-10.24	12	-1.64	0.0504	755	0.914	0.95	17301	0.991	-0.386	1.3
WHSC1L1	-10.22	12	-1.64	0.0508	761	0.914	0.949	17295	0.991	-0.345	1.29
RAB3GAP1	-10.22	12	-1.64	0.0507	756	0.914	0.949	17300	0.991	-0.623	1.29
FANCM	-10.22	12	-1.64	0.0508	760	0.914	0.949	17296	0.991	-0.716	1.29
TMEM25	-10.22	12	-1.64	0.0507	757	0.914	0.949	17299	0.991	-0.579	1.29
MSL1	-10.22	12	-1.64	0.0507	759	0.914	0.949	17297	0.991	-0.799	1.29
RSRC2	-10.18	12	-1.63	0.0515	764	0.914	0.948	17292	0.99	-0.405	1.29
IER3IP1	-10.21	12	-1.64	0.051	762	0.914	0.949	17294	0.991	-0.605	1.29
TRIP6	-10.16	12	-1.63	0.0519	767	0.914	0.948	17289	0.99	-0.267	1.28
EIF4ENIF1	-10.18	12	-1.63	0.0515	763	0.914	0.949	17293	0.99	-0.319	1.29
HNRNPUL1	-10.18	12	-1.63	0.0516	765	0.914	0.948	17291	0.99	-0.523	1.29
CDKN2AIP	-10.17	12	-1.63	0.0518	766	0.914	0.948	17290	0.99	-0.538	1.29
PIGO	-10.16	12	-1.63	0.052	770	0.914	0.948	17286	0.99	-0.708	1.28
ATP2B2	-10.16	12	-1.63	0.0519	768	0.914	0.948	17288	0.99	-0.373	1.28
SLCO3A1	-10.16	12	-1.63	0.052	769	0.914	0.948	17287	0.99	-0.483	1.28
XPO5	-10.14	12	-1.62	0.0524	774	0.914	0.948	17282	0.99	-0.6	1.28
PREP	-10.15	12	-1.62	0.0521	771	0.914	0.948	17285	0.99	-0.463	1.28
SEPHS1	-10.15	12	-1.62	0.0521	772	0.914	0.948	17284	0.99	-0.468	1.28
MRPS30	-10.14	12	-1.62	0.0525	779	0.914	0.948	17277	0.99	-0.533	1.28
NLK	-10.14	12	-1.62	0.0524	777	0.914	0.948	17279	0.99	-0.717	1.28
RMI2	-10.15	12	-1.62	0.0523	773	0.914	0.948	17283	0.99	-0.338	1.28
MTG2	-10.14	12	-1.62	0.0524	775	0.914	0.948	17281	0.99	-0.424	1.28
VPS72	-10.14	12	-1.62	0.0525	778	0.914	0.948	17278	0.99	-0.389	1.28
GJB4	-10.12	12	-1.62	0.0528	783	0.914	0.947	17273	0.99	-0.412	1.28
FGFR1OP2	-10.12	12	-1.62	0.0528	782	0.914	0.947	17274	0.99	-0.317	1.28
ZBTB7A	-10.14	12	-1.62	0.0524	776	0.914	0.948	17280	0.99	-0.454	1.28
NUBP2	-10.13	12	-1.62	0.0526	781	0.914	0.947	17275	0.99	-0.688	1.28
RICTOR	-10.11	12	-1.62	0.053	785	0.914	0.947	17271	0.99	-0.627	1.28
BRD8	-9.7	11	-1.62	0.0525	780	0.914	0.947	17276	0.99	-1.419	1.28
TICRR	-10.12	12	-1.62	0.0529	784	0.914	0.947	17272	0.99	-1.509	1.28
EPN2	-10.08	12	-1.61	0.0538	789	0.914	0.946	17267	0.989	-0.677	1.27
G3BP1	-10.11	12	-1.62	0.0531	786	0.914	0.947	17270	0.99	-0.402	1.27
JUNB	-10.1	12	-1.61	0.0533	787	0.914	0.947	17269	0.99	-0.309	1.27
TOMM5	-10.07	12	-1.61	0.0538	790	0.914	0.946	17266	0.989	-0.611	1.27
SP1	-10.08	12	-1.61	0.0537	788	0.914	0.946	17268	0.989	-0.569	1.27
VCPIP1	-10.07	12	-1.61	0.0539	791	0.914	0.946	17265	0.989	-0.745	1.27
MED18	-10.05	12	-1.6	0.0544	793	0.914	0.946	17263	0.989	-1.366	1.26
PNPT1	-10.03	12	-1.6	0.0547	796	0.914	0.945	17260	0.989	-0.574	1.26
CSRNP1	-10.05	12	-1.6	0.0545	794	0.914	0.946	17262	0.989	-0.434	1.26
MRPL21	-10.06	12	-1.61	0.0542	792	0.914	0.946	17264	0.989	-0.525	1.27
CUL4B	-10.04	12	-1.6	0.0546	795	0.914	0.945	17261	0.989	-0.525	1.26
CSNK2A2	-10.03	12	-1.6	0.0549	797	0.914	0.945	17259	0.989	-0.496	1.26
ATE1	-10.02	12	-1.6	0.055	798	0.914	0.945	17258	0.989	-0.495	1.26
FAM210A	-10	12	-1.59	0.0555	801	0.914	0.945	17255	0.988	-0.633	1.26
SAFB2	-9.99	12	-1.59	0.0556	803	0.914	0.944	17253	0.988	-0.679	1.25
PHB	-10.01	12	-1.6	0.0553	800	0.914	0.945	17256	0.988	-0.549	1.26
MED12	-10.01	12	-1.6	0.0552	799	0.914	0.945	17257	0.988	-0.657	1.26
FAM65A	-9.96	12	-1.59	0.0563	807	0.914	0.944	17249	0.988	-0.591	1.25
MEF2BNB	-10	12	-1.59	0.0555	802	0.914	0.945	17254	0.988	-0.459	1.26
LOH12CR1	-9.99	12	-1.59	0.0557	804	0.914	0.944	17252	0.988	-0.372	1.25
MCAT	-9.97	12	-1.59	0.0561	806	0.914	0.944	17250	0.988	-0.59	1.25
RIF1	-9.99	12	-1.59	0.0557	805	0.914	0.944	17251	0.988	-0.508	1.25
ORC5	-9.95	12	-1.58	0.0565	809	0.914	0.943	17247	0.988	-0.79	1.25
MORF4L2	-9.94	12	-1.58	0.0567	811	0.914	0.943	17245	0.988	-0.621	1.25
IFT140	-9.94	12	-1.58	0.0567	812	0.914	0.943	17244	0.988	-0.471	1.25
FRMD4A	-9.93	12	-1.58	0.057	814	0.914	0.943	17242	0.987	-0.476	1.24
TXNDC15	-9.95	12	-1.58	0.0566	810	0.914	0.943	17246	0.988	-0.606	1.25
ZNF594	-9.94	12	-1.58	0.0568	813	0.914	0.943	17243	0.988	-0.489	1.25
PIGS	-9.9	12	-1.57	0.0576	819	0.914	0.942	17237	0.987	-0.137	1.24
MRPL22	-9.96	12	-1.59	0.0563	808	0.914	0.944	17248	0.988	-0.541	1.25
MED13L	-9.93	12	-1.58	0.057	815	0.914	0.943	17241	0.987	-0.374	1.24
PCMTD2	-9.92	12	-1.58	0.0572	817	0.914	0.943	17239	0.987	-0.609	1.24
DAXX	-9.93	12	-1.58	0.057	816	0.914	0.943	17240	0.987	-0.602	1.24
PCIF1	-9.92	12	-1.58	0.0574	818	0.914	0.943	17238	0.987	-0.539	1.24
TAF6	-9.9	12	-1.57	0.0578	820	0.914	0.942	17236	0.987	-0.958	1.24
NUP35	-9.9	12	-1.57	0.0578	821	0.914	0.942	17235	0.987	-0.61	1.24
LAMA3	-9.89	12	-1.57	0.058	822	0.914	0.942	17234	0.987	-0.394	1.24
ACVR2A	-9.89	12	-1.57	0.0581	823	0.914	0.942	17233	0.987	-0.48	1.24
METTL16	-9.87	12	-1.57	0.0584	824	0.914	0.942	17232	0.987	-0.535	1.23
RSF1	-9.87	12	-1.57	0.0585	825	0.914	0.941	17231	0.987	-0.367	1.23
CD8B	-9.86	12	-1.57	0.0587	826	0.914	0.941	17230	0.986	-0.434	1.23
CCDC47	-9.41	11	-1.56	0.0595	832	0.914	0.941	17224	0.986	-1.06	1.23
TANGO2	-9.85	12	-1.56	0.059	828	0.914	0.941	17228	0.986	-0.627	1.23
GTF2I	-9.82	12	-1.56	0.0595	833	0.914	0.94	17223	0.986	-0.459	1.23
AURKAIP1	-9.84	12	-1.56	0.0592	829	0.914	0.941	17227	0.986	-0.414	1.23
DPH5	-9.83	12	-1.56	0.0594	831	0.914	0.941	17225	0.986	-0.761	1.23
KIAA1432	-9.83	12	-1.56	0.0593	830	0.914	0.941	17226	0.986	-0.369	1.23
IKBKAP	-9.81	12	-1.56	0.0598	834	0.914	0.94	17222	0.986	-1.218	1.22
NDC1	-9.79	12	-1.55	0.0603	837	0.914	0.94	17219	0.985	-0.715	1.22
SCGB1C1	-9.81	12	-1.56	0.0598	835	0.914	0.94	17221	0.986	-0.472	1.22
ERI1	-9.85	12	-1.56	0.0589	827	0.914	0.941	17229	0.986	-0.496	1.23
YEATS4	-9.79	12	-1.55	0.0603	838	0.914	0.94	17218	0.985	-0.529	1.22
ITGAV	-9.39	11	-1.56	0.0598	836	0.914	0.94	17220	0.986	-2.026	1.22
IFITM3	-9.78	12	-1.55	0.0606	840	0.914	0.939	17216	0.985	-0.525	1.22
C9orf41	-9.78	12	-1.55	0.0604	839	0.914	0.94	17217	0.985	-0.495	1.22
SLC25A28	-9.77	12	-1.55	0.0609	842	0.914	0.939	17214	0.985	-0.812	1.22
ZNF865	-9.77	12	-1.55	0.0609	843	0.914	0.939	17213	0.985	-0.603	1.22
SLC26A11	-9.74	12	-1.54	0.0616	848	0.914	0.938	17208	0.985	-0.347	1.21
PET112	-9.74	12	-1.54	0.0614	847	0.914	0.939	17209	0.985	-0.305	1.21
B3GNT2	-9.76	12	-1.55	0.0611	844	0.914	0.939	17212	0.985	-0.575	1.21
EXOC5	-9.77	12	-1.55	0.0607	841	0.914	0.939	17215	0.985	-0.776	1.22
RNF40	-9.76	12	-1.55	0.0611	846	0.914	0.939	17210	0.985	-0.753	1.21
KIAA0100	-9.72	12	-1.54	0.0619	850	0.914	0.938	17206	0.984	-0.277	1.21
FANCG	-9.76	12	-1.55	0.0611	845	0.914	0.939	17211	0.985	-0.627	1.21
TNPO3	-9.73	12	-1.54	0.0618	849	0.914	0.938	17207	0.984	-0.54	1.21
MED7	-8.41	9	-1.54	0.0621	855	0.914	0.938	17201	0.984	-0.155	1.21
SRC	-9.72	12	-1.54	0.0621	853	0.914	0.938	17203	0.984	-0.358	1.21
PRPF38B	-9.71	12	-1.54	0.0622	856	0.914	0.938	17200	0.984	-0.64	1.21
SARS2	-9.72	12	-1.54	0.0621	851	0.914	0.938	17205	0.984	-0.359	1.21
KXD1	-9.72	12	-1.54	0.0621	854	0.914	0.938	17202	0.984	-0.221	1.21
TONSL	-9.7	12	-1.53	0.0626	860	0.914	0.937	17196	0.984	-1.124	1.2
TMEM185B	-9.69	12	-1.53	0.0628	861	0.914	0.937	17195	0.984	-0.481	1.2
NUP93	-9.71	12	-1.54	0.0624	858	0.914	0.938	17198	0.984	-1.04	1.2
CLK2	-9.7	12	-1.54	0.0624	859	0.914	0.938	17197	0.984	-0.489	1.2
SEMA3G	-9.71	12	-1.54	0.0623	857	0.914	0.938	17199	0.984	-0.486	1.21
DLD	-9.72	12	-1.54	0.0621	852	0.914	0.938	17204	0.984	-0.373	1.21
SLC25A26	-9.67	12	-1.53	0.0633	863	0.914	0.937	17193	0.984	-0.461	1.2
TOMM70A	-9.65	12	-1.52	0.0636	865	0.914	0.936	17191	0.983	-0.563	1.2
AZIN1	-9.68	12	-1.53	0.0631	862	0.914	0.937	17194	0.984	-0.599	1.2
VRK1	-9.66	12	-1.53	0.0634	864	0.914	0.937	17192	0.984	-0.634	1.2
PUM1	-9.65	12	-1.52	0.0638	866	0.914	0.936	17190	0.983	-0.596	1.2
FOXF2	-9.62	12	-1.52	0.0645	874	0.914	0.936	17182	0.983	-0.648	1.19
FA2H	-9.63	12	-1.52	0.0641	869	0.914	0.936	17187	0.983	-0.334	1.19
ST8SIA1	-9.63	12	-1.52	0.0643	870	0.914	0.936	17186	0.983	-0.48	1.19
TMEM210	-9.62	12	-1.52	0.0644	871	0.914	0.936	17185	0.983	-0.215	1.19
DNAJC17	-9.62	12	-1.52	0.0644	873	0.914	0.936	17183	0.983	-0.935	1.19
XRCC3	-9.62	12	-1.52	0.0644	872	0.914	0.936	17184	0.983	-0.722	1.19
AMOTL1	-9.61	12	-1.52	0.0646	875	0.914	0.935	17181	0.983	-0.277	1.19
GNAI2	-9.64	12	-1.52	0.064	868	0.914	0.936	17188	0.983	-0.355	1.19
FAM120A	-9.59	12	-1.51	0.0651	880	0.914	0.935	17176	0.983	-0.515	1.19
MARCH9	-9.59	12	-1.51	0.0652	881	0.914	0.935	17175	0.983	-0.46	1.19
CTBP2	-9.64	12	-1.52	0.0639	867	0.914	0.936	17189	0.983	-0.499	1.19
MAP3K2	-9.6	12	-1.51	0.0651	879	0.914	0.935	17177	0.983	-0.377	1.19
TRIM50	-9.61	12	-1.52	0.0648	876	0.914	0.935	17180	0.983	-0.618	1.19
P2RX1	-9.61	12	-1.52	0.0648	877	0.914	0.935	17179	0.983	-0.55	1.19
GAS2L1	-9.59	12	-1.51	0.0652	882	0.914	0.935	17174	0.983	-0.402	1.19
APTX	-9.56	12	-1.51	0.0661	892	0.914	0.934	17164	0.982	-0.464	1.18
UBE2E1	-9.59	12	-1.51	0.0653	883	0.914	0.935	17173	0.983	-0.505	1.19
ATP5A1	-9.61	12	-1.52	0.0648	878	0.914	0.935	17178	0.983	-0.439	1.19
BTN2A2	-9.56	12	-1.51	0.0659	887	0.914	0.934	17169	0.982	-0.3	1.18
GAPVD1	-9.57	12	-1.51	0.0657	886	0.914	0.934	17170	0.982	-0.576	1.18
CTCF	-9.56	12	-1.51	0.0661	893	0.914	0.934	17163	0.982	-1.312	1.18
CHMP7	-9.56	12	-1.51	0.066	889	0.914	0.934	17167	0.982	-0.585	1.18
CCNE2	-9.57	12	-1.51	0.0657	885	0.914	0.934	17171	0.982	-0.667	1.18
GPR108	-9.57	12	-1.51	0.0656	884	0.914	0.934	17172	0.982	-0.346	1.18
TAF15	-8.24	9	-1.5	0.0673	906	0.914	0.933	17150	0.982	-0.437	1.17
TRAM2	-9.56	12	-1.51	0.0659	888	0.914	0.934	17168	0.982	-0.393	1.18
ZBTB42	-9.56	12	-1.51	0.066	890	0.914	0.934	17166	0.982	-0.414	1.18
OSGEP	-9.55	12	-1.5	0.0664	894	0.914	0.934	17162	0.982	-1.586	1.18
MAP3K11	-9.52	12	-1.5	0.0669	900	0.914	0.933	17156	0.982	-0.43	1.17
CWC22	-9.56	12	-1.51	0.066	891	0.914	0.934	17165	0.982	-0.751	1.18
HAUS4	-9.52	12	-1.5	0.067	902	0.914	0.933	17154	0.982	-0.41	1.17
METTL3	-9.54	12	-1.5	0.0665	895	0.914	0.934	17161	0.982	-0.681	1.18
ELP3	-9.53	12	-1.5	0.0667	898	0.914	0.933	17158	0.982	-1.276	1.18
RNF149	-9.52	12	-1.5	0.067	901	0.914	0.933	17155	0.982	-0.275	1.17
PGGT1B	-9.51	12	-1.5	0.0673	907	0.914	0.933	17149	0.982	-1.206	1.17
EIF4E2	-9.52	12	-1.5	0.0669	899	0.914	0.933	17157	0.982	-0.328	1.17
NUP205	-9.52	12	-1.5	0.0671	903	0.914	0.933	17153	0.982	-0.569	1.17
CWF19L2	-9.54	12	-1.5	0.0666	896	0.914	0.933	17160	0.982	-0.328	1.18
SPAG5	-9.51	12	-1.5	0.0674	908	0.914	0.933	17148	0.982	-0.574	1.17
GNB4	-9.51	12	-1.5	0.0674	909	0.914	0.933	17147	0.982	-0.378	1.17
SIK3	-9.51	12	-1.5	0.0672	904	0.914	0.933	17152	0.982	-0.5	1.17
STIL	-9.51	12	-1.5	0.0673	905	0.914	0.933	17151	0.982	-0.249	1.17
ING3	-9.51	12	-1.5	0.0674	910	0.914	0.933	17146	0.982	-0.393	1.17
EIF3H	-9.5	12	-1.49	0.0675	911	0.914	0.932	17145	0.982	-0.686	1.17
CENPT	-9.54	12	-1.5	0.0666	897	0.914	0.933	17159	0.982	-0.557	1.18
STMN1	-9.48	12	-1.49	0.068	919	0.914	0.932	17137	0.982	-0.387	1.17
FLNA	-9.5	12	-1.49	0.0675	912	0.914	0.932	17144	0.982	-0.357	1.17
PLEKHH2	-9.5	12	-1.49	0.0676	913	0.914	0.932	17143	0.982	-0.49	1.17
IL17RB	-9.49	12	-1.49	0.0678	916	0.914	0.932	17140	0.982	-0.677	1.17
UFSP2	-9.49	12	-1.49	0.0679	917	0.914	0.932	17139	0.982	-0.618	1.17
BRK1	-9.49	12	-1.49	0.0678	915	0.914	0.932	17141	0.982	-0.679	1.17
TEFM	-9.48	12	-1.49	0.0679	918	0.914	0.932	17138	0.982	-0.672	1.17
SARM1	-9.46	12	-1.49	0.0686	925	0.914	0.931	17131	0.982	-0.625	1.16
POLR2A	-9.46	12	-1.49	0.0685	924	0.914	0.931	17132	0.982	-0.605	1.16
TLK1	-9.47	12	-1.49	0.0682	921	0.914	0.932	17135	0.982	-0.297	1.17
DAOA	-9.47	12	-1.49	0.0683	922	0.914	0.932	17134	0.982	-0.426	1.17
PAK2	-9.47	12	-1.49	0.0682	920	0.914	0.932	17136	0.982	-0.337	1.17
SNRNP27	-9.47	12	-1.49	0.0685	923	0.914	0.932	17133	0.982	-1.15	1.16
TFAM	-9.49	12	-1.49	0.0677	914	0.914	0.932	17142	0.982	-0.349	1.17
STT3B	-9.46	12	-1.49	0.0686	926	0.914	0.931	17130	0.982	-0.504	1.16
MIB1	-9.44	12	-1.48	0.0691	929	0.914	0.931	17127	0.981	-0.499	1.16
PIK3R4	-9.45	12	-1.48	0.0688	927	0.914	0.931	17129	0.982	-0.626	1.16
CIC	-9.45	12	-1.48	0.0689	928	0.914	0.931	17128	0.982	-0.561	1.16
GPX7	-9.43	12	-1.48	0.0693	930	0.914	0.931	17126	0.981	-0.469	1.16
MTPAP	-9.42	12	-1.48	0.0697	932	0.914	0.93	17124	0.981	-0.363	1.16
AQR	-9.03	11	-1.48	0.0693	931	0.914	0.931	17125	0.981	-0.608	1.16
NKX6-1	-9.42	12	-1.48	0.0698	933	0.914	0.93	17123	0.981	-0.389	1.16
PPP2R5E	-9.39	12	-1.47	0.0705	937	0.914	0.929	17119	0.98	-0.414	1.15
TM2D2	-9.4	12	-1.47	0.0702	935	0.914	0.93	17121	0.98	-0.398	1.15
CYB561D2	-9.4	12	-1.47	0.0701	934	0.914	0.93	17122	0.981	-0.275	1.15
UBE2T	-9.39	12	-1.47	0.0703	936	0.914	0.93	17120	0.98	-0.47	1.15
CUL7	-9.37	12	-1.47	0.0709	942	0.914	0.929	17114	0.98	-0.492	1.15
TOMM34	-9.38	12	-1.47	0.0708	940	0.914	0.929	17116	0.98	-0.47	1.15
FAM60A	-9.36	12	-1.47	0.0714	944	0.914	0.929	17112	0.98	-0.507	1.15
DCLRE1B	-9.35	12	-1.46	0.0716	945	0.914	0.928	17111	0.98	-0.476	1.15
MRPS34	-9.38	12	-1.47	0.0709	941	0.914	0.929	17115	0.98	-0.298	1.15
TTC1	-9.38	12	-1.47	0.0707	938	0.914	0.929	17118	0.98	-0.945	1.15
DCLK3	-9.36	12	-1.47	0.0713	943	0.914	0.929	17113	0.98	-0.276	1.15
CNEP1R1	-9.38	12	-1.47	0.0708	939	0.914	0.929	17117	0.98	-0.535	1.15
KDM4B	-9.35	12	-1.46	0.0717	946	0.914	0.928	17110	0.98	-0.267	1.14
FANCF	-9.34	12	-1.46	0.0717	947	0.914	0.928	17109	0.98	-0.145	1.14
ZYX	-9.33	12	-1.46	0.0721	948	0.914	0.928	17108	0.979	-0.505	1.14
CITED2	-9.32	12	-1.46	0.0723	950	0.914	0.928	17106	0.979	-0.638	1.14
SOGA2	-9.29	12	-1.45	0.0732	953	0.914	0.927	17103	0.978	-0.821	1.14
NEDD8	-8.08	9	-1.46	0.0722	949	0.914	0.928	17107	0.979	-1.637	1.14
LETM1	-8.06	9	-1.46	0.0728	951	0.914	0.927	17105	0.979	-0.424	1.14
ADO	-9.3	12	-1.45	0.0729	952	0.914	0.927	17104	0.979	-0.52	1.14
MED29	-9.28	12	-1.45	0.0733	956	0.914	0.927	17100	0.978	-0.625	1.13
HYAL2	-9.29	12	-1.45	0.0732	954	0.914	0.927	17102	0.978	-0.479	1.14
NCAPD3	-9.28	12	-1.45	0.0734	958	0.914	0.927	17098	0.978	-0.923	1.13
CCDC64	-9.28	12	-1.45	0.0734	957	0.914	0.927	17099	0.978	-0.476	1.13
SPINT3	-9.29	12	-1.45	0.0733	955	0.914	0.927	17101	0.978	-0.379	1.13
MRPL44	-9.28	12	-1.45	0.0734	959	0.914	0.927	17097	0.978	-0.617	1.13
WRB	-9.27	12	-1.45	0.0737	961	0.914	0.926	17095	0.978	-0.612	1.13
ALG9	-9.27	12	-1.45	0.0736	960	0.914	0.926	17096	0.978	-0.5	1.13
SLC30A8	-9.26	12	-1.45	0.074	966	0.914	0.926	17090	0.978	-0.516	1.13
RNF166	-9.27	12	-1.45	0.0737	962	0.914	0.926	17094	0.978	-0.598	1.13
CTIF	-9.26	12	-1.45	0.0739	964	0.914	0.926	17092	0.978	-0.589	1.13
TECR	-9.27	12	-1.45	0.0737	963	0.914	0.926	17093	0.978	-0.433	1.13
COPZ1	-9.26	12	-1.45	0.0741	968	0.914	0.926	17088	0.978	-0.367	1.13
ANKRD54	-9.26	12	-1.45	0.074	965	0.914	0.926	17091	0.978	-0.509	1.13
MITF	-9.24	12	-1.44	0.0747	972	0.914	0.925	17084	0.978	-0.61	1.13
SAPCD2	-9.24	12	-1.44	0.0745	970	0.914	0.926	17086	0.978	-0.657	1.13
LDLRAD3	-9.26	12	-1.45	0.0741	967	0.914	0.926	17089	0.978	-0.566	1.13
MECR	-9.25	12	-1.44	0.0743	969	0.914	0.926	17087	0.978	-0.35	1.13
CELSR2	-9.23	12	-1.44	0.0749	973	0.914	0.925	17083	0.978	-0.359	1.13
DUS1L	-9.24	12	-1.44	0.0745	971	0.914	0.925	17085	0.978	-0.715	1.13
TUB	-9.23	12	-1.44	0.075	976	0.914	0.925	17080	0.978	-0.647	1.12
ANO9	-9.23	12	-1.44	0.0749	974	0.914	0.925	17082	0.978	-0.299	1.13
COL20A1	-9.22	12	-1.44	0.075	977	0.914	0.925	17079	0.978	-0.389	1.12
RPTOR	-9.23	12	-1.44	0.075	975	0.914	0.925	17081	0.978	-0.695	1.12
DHX36	-9.2	12	-1.43	0.0757	979	0.914	0.924	17077	0.977	-0.427	1.12
PGAP2	-9.2	12	-1.43	0.0759	980	0.914	0.924	17076	0.977	-0.488	1.12
UBE2E3	-9.2	12	-1.44	0.0756	978	0.914	0.924	17078	0.977	-0.405	1.12
DCTN1	-9.18	12	-1.43	0.0763	987	0.914	0.924	17069	0.977	-0.491	1.12
SCRN2	-9.19	12	-1.43	0.0761	983	0.914	0.924	17073	0.977	-0.363	1.12
ZNF830	-9.17	12	-1.43	0.0765	989	0.914	0.923	17067	0.977	-0.644	1.12
NEDD1	-9.18	12	-1.43	0.0764	988	0.914	0.924	17068	0.977	-1.485	1.12
INIP	-9.19	12	-1.43	0.0759	981	0.914	0.924	17075	0.977	-0.448	1.12
URM1	-9.18	12	-1.43	0.0762	986	0.914	0.924	17070	0.977	-0.915	1.12
ZNF341	-9.18	12	-1.43	0.0761	984	0.914	0.924	17072	0.977	-0.257	1.12
C17orf98	-7.96	9	-1.43	0.076	982	0.914	0.924	17074	0.977	-0.454	1.12
AHCYL1	-9.17	12	-1.43	0.0766	990	0.914	0.923	17066	0.977	-0.404	1.12
COMMD7	-9.18	12	-1.43	0.0762	985	0.914	0.924	17071	0.977	-0.509	1.12
NRF1	-9.16	12	-1.43	0.0768	991	0.914	0.923	17065	0.977	-1.197	1.11
METTL23	-9.12	12	-1.42	0.0779	994	0.914	0.922	17062	0.976	-0.314	1.11
ARL6IP1	-9.15	12	-1.42	0.0771	992	0.914	0.923	17064	0.976	-0.571	1.11
BEND3	-9.13	12	-1.42	0.0777	993	0.914	0.922	17063	0.976	-0.475	1.11
DGCR2	-9.12	12	-1.42	0.0779	995	0.914	0.922	17061	0.976	-0.313	1.11
MRPL54	-9.1	12	-1.41	0.0787	998	0.914	0.921	17058	0.975	-0.557	1.1
EHMT2	-9.1	12	-1.42	0.0784	996	0.914	0.922	17060	0.975	-0.538	1.11
MCM3AP	-9.1	12	-1.41	0.0787	999	0.914	0.921	17057	0.975	-0.666	1.1
FBXL19	-9.09	12	-1.41	0.0789	1002	0.914	0.921	17054	0.975	-0.329	1.1
C19orf12	-9.1	12	-1.41	0.0787	997	0.914	0.921	17059	0.975	-0.208	1.1
DLG5	-9.09	12	-1.41	0.079	1003	0.914	0.921	17053	0.975	-0.358	1.1
ATG12	-9.09	12	-1.41	0.0789	1001	0.914	0.921	17055	0.975	-0.386	1.1
RCC2	-7.84	9	-1.41	0.0798	1012	0.914	0.92	17044	0.975	-0.222	1.1
GJA4	-9.09	12	-1.41	0.0788	1000	0.914	0.921	17056	0.975	-0.282	1.1
ZMYND15	-9.09	12	-1.41	0.079	1005	0.914	0.921	17051	0.975	-0.358	1.1
NEK1	-9.08	12	-1.41	0.0793	1008	0.914	0.921	17048	0.975	-0.454	1.1
PGAP3	-9.08	12	-1.41	0.0792	1006	0.914	0.921	17050	0.975	-0.317	1.1
UPK3BL	-9.09	12	-1.41	0.079	1004	0.914	0.921	17052	0.975	-0.571	1.1
LY6G5B	-9.07	12	-1.41	0.0794	1009	0.914	0.921	17047	0.975	-0.649	1.1
FANCC	-9.04	12	-1.4	0.0805	1022	0.914	0.92	17034	0.975	-0.29	1.09
GIGYF1	-9.07	12	-1.41	0.0796	1010	0.914	0.92	17046	0.975	-0.395	1.1
HNRNPA2B1	-9.08	12	-1.41	0.0792	1007	0.914	0.921	17049	0.975	-0.438	1.1
POU4F1	-9.06	12	-1.41	0.0798	1011	0.914	0.92	17045	0.975	-0.405	1.1
CES2	-9.05	12	-1.41	0.08	1014	0.914	0.92	17042	0.975	-0.543	1.1
MAP2	-9.05	12	-1.41	0.08	1015	0.914	0.92	17041	0.975	-0.529	1.1
PRKCE	-9.06	12	-1.41	0.0798	1013	0.914	0.92	17043	0.975	-0.547	1.1
ADCK2	-9.04	12	-1.4	0.0803	1021	0.914	0.92	17035	0.975	-0.342	1.1
MYBPC1	-9.05	12	-1.4	0.0801	1017	0.914	0.92	17039	0.975	-0.447	1.1
COLEC11	-9.05	12	-1.4	0.08	1016	0.914	0.92	17040	0.975	-0.475	1.1
C19orf52	-9.04	12	-1.4	0.0803	1019	0.914	0.92	17037	0.975	-0.909	1.1
EGR4	-9.03	12	-1.4	0.0806	1023	0.914	0.919	17033	0.975	-0.428	1.09
EML3	-8.99	12	-1.39	0.0819	1027	0.914	0.918	17029	0.973	-0.447	1.09
SPTB	-9.04	12	-1.4	0.0803	1020	0.914	0.92	17036	0.975	-0.453	1.1
NBAS	-9.05	12	-1.4	0.0801	1018	0.914	0.92	17038	0.975	-0.257	1.1
TTC14	-9	12	-1.39	0.0816	1025	0.914	0.918	17031	0.974	-0.315	1.09
MIS18BP1	-8.99	12	-1.39	0.0818	1026	0.914	0.918	17030	0.973	-0.756	1.09
IMP4	-8.63	11	-1.4	0.0812	1024	0.914	0.919	17032	0.974	-0.98	1.09
WBSCR16	-8.98	12	-1.39	0.0823	1030	0.914	0.918	17026	0.973	-0.326	1.08
HSD17B10	-8.98	12	-1.39	0.082	1028	0.914	0.918	17028	0.973	-0.492	1.09
C1orf86	-8.98	12	-1.39	0.0821	1029	0.914	0.918	17027	0.973	-0.248	1.09
SHFM1	-8.94	12	-1.38	0.0834	1037	0.914	0.917	17019	0.972	-0.41	1.08
WDR61	-8.98	12	-1.39	0.0823	1031	0.914	0.918	17025	0.973	-0.697	1.08
CSTF1	-8.97	12	-1.39	0.0824	1032	0.914	0.918	17024	0.973	-0.843	1.08
TFE3	-8.96	12	-1.39	0.0828	1033	0.914	0.917	17023	0.973	-0.396	1.08
FOSL1	-8.93	12	-1.38	0.0837	1042	0.914	0.916	17014	0.972	-0.38	1.08
LEMD2	-8.96	12	-1.39	0.0828	1034	0.914	0.917	17022	0.973	-0.492	1.08
ABCC6	-8.91	12	-1.38	0.0842	1048	0.914	0.916	17008	0.972	-0.737	1.07
NUP88	-8.95	12	-1.38	0.0831	1035	0.914	0.917	17021	0.973	-0.889	1.08
NKD1	-8.94	12	-1.38	0.0834	1036	0.914	0.917	17020	0.972	-0.442	1.08
POLE3	-8.94	12	-1.38	0.0834	1038	0.914	0.917	17018	0.972	-0.634	1.08
ADNP2	-8.93	12	-1.38	0.0836	1040	0.914	0.916	17016	0.972	-0.35	1.08
PRDX1	-7.73	9	-1.38	0.0837	1041	0.914	0.916	17015	0.972	-0.416	1.08
FAM98C	-8.93	12	-1.38	0.0838	1043	0.914	0.916	17013	0.972	-0.491	1.08
ABCF1	-8.93	12	-1.38	0.0838	1045	0.914	0.916	17011	0.972	-0.381	1.08
RPAP2	-8.92	12	-1.38	0.0841	1047	0.914	0.916	17009	0.972	-0.802	1.08
PSMD4	-8.93	12	-1.38	0.0838	1044	0.914	0.916	17012	0.972	-1.25	1.08
BCL2L1	-8.92	12	-1.38	0.0839	1046	0.914	0.916	17010	0.972	-0.396	1.08
PTRH2	-8.93	12	-1.38	0.0835	1039	0.914	0.916	17017	0.972	-0.389	1.08
CYP3A5	-8.89	12	-1.37	0.0849	1055	0.914	0.915	17001	0.972	-0.523	1.07
DHX38	-8.9	12	-1.37	0.0846	1053	0.914	0.915	17003	0.972	-0.59	1.07
GRAMD1A	-8.9	12	-1.37	0.0847	1054	0.914	0.915	17002	0.972	-0.274	1.07
FAM96B	-8.91	12	-1.38	0.0845	1049	0.914	0.916	17007	0.972	-1.597	1.07
NWD1	-8.88	12	-1.37	0.0851	1058	0.914	0.915	16998	0.972	-0.331	1.07
FEM1A	-8.9	12	-1.38	0.0845	1050	0.914	0.916	17006	0.972	-0.256	1.07
NRGN	-8.9	12	-1.37	0.0846	1052	0.914	0.915	17004	0.972	-0.338	1.07
GLG1	-8.89	12	-1.37	0.085	1057	0.914	0.915	16999	0.972	-0.596	1.07
YY1	-8.89	12	-1.37	0.085	1056	0.914	0.915	17000	0.972	-0.237	1.07
EVA1A	-7.69	9	-1.37	0.0853	1061	0.914	0.915	16995	0.972	-0.396	1.07
CYLD	-8.88	12	-1.37	0.0852	1060	0.914	0.915	16996	0.972	-0.273	1.07
MRPL16	-8.86	12	-1.37	0.0858	1064	0.914	0.914	16992	0.971	-0.555	1.07
KCNA3	-8.9	12	-1.38	0.0846	1051	0.914	0.915	17005	0.972	-0.474	1.07
PRRT4	-8.88	12	-1.37	0.0852	1059	0.914	0.915	16997	0.972	-0.417	1.07
ATP5D	-8.86	12	-1.37	0.0857	1063	0.914	0.914	16993	0.971	-0.443	1.07
TMEM230	-8.85	12	-1.37	0.086	1068	0.914	0.914	16988	0.971	-0.345	1.07
NUP62	-8.85	12	-1.37	0.0861	1069	0.914	0.914	16987	0.971	-0.519	1.06
SIRT2	-8.87	12	-1.37	0.0854	1062	0.914	0.915	16994	0.972	-0.417	1.07
ARRDC5	-8.86	12	-1.37	0.0859	1065	0.914	0.914	16991	0.971	-0.545	1.07
PRDM16	-8.84	12	-1.36	0.0865	1074	0.914	0.913	16982	0.971	-0.664	1.06
LIPT2	-8.86	12	-1.37	0.086	1067	0.914	0.914	16989	0.971	-0.519	1.07
EXO1	-8.86	12	-1.37	0.086	1066	0.914	0.914	16990	0.971	-0.588	1.07
OR1E2	-7.66	9	-1.36	0.0864	1072	0.914	0.914	16984	0.971	-0.702	1.06
SPTLC3	-8.84	12	-1.36	0.0864	1071	0.914	0.914	16985	0.971	-0.354	1.06
LPIN2	-8.83	12	-1.36	0.0867	1075	0.914	0.913	16981	0.971	-0.377	1.06
AEBP2	-8.84	12	-1.36	0.0865	1073	0.914	0.914	16983	0.971	-0.407	1.06
TTF1	-8.82	12	-1.36	0.087	1076	0.914	0.913	16980	0.971	-0.716	1.06
KIF1B	-8.85	12	-1.36	0.0862	1070	0.914	0.914	16986	0.971	-0.559	1.06
RPL10L	-8.81	12	-1.36	0.0873	1081	0.914	0.913	16975	0.971	-0.62	1.06
TADA3	-8.82	12	-1.36	0.0871	1078	0.914	0.913	16978	0.971	-0.474	1.06
TM9SF2	-8.82	12	-1.36	0.0872	1080	0.914	0.913	16976	0.971	-0.577	1.06
ATM	-8.82	12	-1.36	0.0871	1077	0.914	0.913	16979	0.971	-0.211	1.06
PDZD8	-8.82	12	-1.36	0.0871	1079	0.914	0.913	16977	0.971	-0.332	1.06
THAP3	-8.79	12	-1.35	0.088	1085	0.914	0.912	16971	0.97	-0.42	1.06
TULP3	-8.79	12	-1.35	0.088	1087	0.914	0.912	16969	0.97	-0.683	1.06
MCM4	-8.8	12	-1.36	0.0877	1082	0.914	0.912	16974	0.97	-0.887	1.06
RPGRIP1	-8.43	11	-1.35	0.0877	1083	0.914	0.912	16973	0.97	-0.35	1.06
MST1	-8.8	12	-1.35	0.0878	1084	0.914	0.912	16972	0.97	-0.538	1.06
SLMO2	-8.79	12	-1.35	0.088	1086	0.914	0.912	16970	0.97	-0.435	1.06
ZWINT	-8.78	12	-1.35	0.0883	1088	0.914	0.912	16968	0.97	-0.587	1.05
DENND4C	-8.78	12	-1.35	0.0883	1089	0.914	0.912	16967	0.97	-0.312	1.05
DMRTA2	-8.76	12	-1.35	0.0889	1097	0.914	0.911	16959	0.97	-0.501	1.05
ATP5F1	-8.77	12	-1.35	0.0887	1095	0.914	0.911	16961	0.97	-0.44	1.05
CANT1	-8.78	12	-1.35	0.0884	1091	0.914	0.912	16965	0.97	-0.434	1.05
SKP1	-7.6	9	-1.35	0.0883	1090	0.914	0.912	16966	0.97	-1.042	1.05
MTERFD2	-8.78	12	-1.35	0.0885	1092	0.914	0.911	16964	0.97	-0.308	1.05
NDUFAB1	-8.76	12	-1.35	0.0891	1099	0.914	0.911	16957	0.97	-0.49	1.05
KPNA4	-8.76	12	-1.35	0.0891	1100	0.914	0.911	16956	0.97	-0.505	1.05
CCAR2	-8.76	12	-1.35	0.0889	1096	0.914	0.911	16960	0.97	-0.767	1.05
PIGB	-8.78	12	-1.35	0.0885	1093	0.914	0.911	16963	0.97	-0.458	1.05
TAF11	-8.77	12	-1.35	0.0886	1094	0.914	0.911	16962	0.97	-0.281	1.05
SPC24	-7.58	9	-1.35	0.0893	1104	0.914	0.911	16952	0.97	-0.5	1.05
ANKRD27	-8.76	12	-1.35	0.0892	1101	0.914	0.911	16955	0.97	-0.325	1.05
TEAD4	-8.75	12	-1.35	0.0892	1102	0.914	0.911	16954	0.97	-0.561	1.05
ATAD5	-8.76	12	-1.35	0.0889	1098	0.914	0.911	16958	0.97	-0.712	1.05
LY6K	-8.73	12	-1.34	0.0899	1109	0.914	0.91	16947	0.97	-0.437	1.05
SPRED3	-8.75	12	-1.35	0.0893	1103	0.914	0.911	16953	0.97	-0.217	1.05
LMNB1	-8.74	12	-1.34	0.0897	1106	0.914	0.91	16950	0.97	-0.448	1.05
HSPA9	-7.98	10	-1.34	0.0897	1107	0.914	0.91	16949	0.97	-1.152	1.05
ASIC2	-8.74	12	-1.34	0.0896	1105	0.914	0.91	16951	0.97	-0.184	1.05
AFG3L2	-8.73	12	-1.34	0.09	1110	0.914	0.91	16946	0.97	-0.412	1.05
WDR26	-7.55	9	-1.34	0.0904	1116	0.914	0.91	16940	0.969	-0.469	1.04
PTK6	-8.74	12	-1.34	0.0898	1108	0.914	0.91	16948	0.97	-0.465	1.05
KDM4A	-8.73	12	-1.34	0.09	1112	0.914	0.91	16944	0.97	-0.635	1.05
EXOC1	-8.73	12	-1.34	0.09	1111	0.914	0.91	16945	0.97	-0.54	1.05
ZNF706	-8.73	12	-1.34	0.0901	1113	0.914	0.91	16943	0.97	-0.589	1.05
PHF15	-8.72	12	-1.34	0.0902	1114	0.914	0.91	16942	0.97	-0.349	1.04
SEMA4C	-8.72	12	-1.34	0.0902	1115	0.914	0.91	16941	0.97	-0.244	1.04
PTP4A2	-8.69	12	-1.33	0.0914	1118	0.914	0.909	16938	0.969	-0.357	1.04
TRABD	-8.68	12	-1.33	0.0915	1120	0.914	0.909	16936	0.969	-0.396	1.04
TM4SF5	-8.69	12	-1.33	0.0914	1119	0.914	0.909	16937	0.969	-0.462	1.04
TMEM88	-8.68	12	-1.33	0.0917	1122	0.914	0.908	16934	0.968	-0.592	1.04
CHERP	-8.67	12	-1.33	0.0921	1124	0.914	0.908	16932	0.968	-0.333	1.04
HDAC8	-8.68	12	-1.33	0.0917	1121	0.914	0.908	16935	0.968	-0.666	1.04
BRCA2	-8.71	12	-1.34	0.0908	1117	0.914	0.909	16939	0.969	-0.45	1.04
RPE	-8.66	12	-1.33	0.0921	1126	0.914	0.908	16930	0.968	-0.533	1.04
CD248	-8.67	12	-1.33	0.0921	1125	0.914	0.908	16931	0.968	-0.427	1.04
CRYBG3	-8.63	12	-1.32	0.0934	1136	0.914	0.907	16920	0.967	-0.5	1.03
TM2D1	-8.28	11	-1.32	0.0927	1132	0.914	0.907	16924	0.968	-0.233	1.03
SAMD10	-8.66	12	-1.33	0.0923	1127	0.914	0.908	16929	0.968	-0.203	1.03
RAB5C	-8.65	12	-1.32	0.0927	1130	0.914	0.907	16926	0.968	-0.426	1.03
EFS	-8.66	12	-1.33	0.0924	1128	0.914	0.908	16928	0.968	-0.332	1.03
CLASRP	-8.65	12	-1.33	0.0925	1129	0.914	0.907	16927	0.968	-0.477	1.03
RPP38	-8.65	12	-1.32	0.0928	1133	0.914	0.907	16923	0.968	-0.738	1.03
USF2	-8.67	12	-1.33	0.092	1123	0.914	0.908	16933	0.968	-0.234	1.04
SRCRB4D	-8.65	12	-1.32	0.0927	1131	0.914	0.907	16925	0.968	-0.19	1.03
SH3RF1	-8.64	12	-1.32	0.093	1134	0.914	0.907	16922	0.968	-0.373	1.03
ZBTB11	-8.63	12	-1.32	0.0932	1135	0.914	0.907	16921	0.968	-0.597	1.03
ASNA1	-8.6	12	-1.31	0.0943	1149	0.914	0.906	16907	0.967	-0.268	1.03
WDR82	-8.61	12	-1.32	0.0939	1140	0.914	0.906	16916	0.967	-0.841	1.03
SNAPC5	-8.61	12	-1.32	0.0938	1139	0.914	0.906	16917	0.967	-0.457	1.03
PPP2R3A	-8.6	12	-1.32	0.0942	1146	0.914	0.906	16910	0.967	-0.4	1.03
CCDC64B	-8.61	12	-1.32	0.0941	1144	0.914	0.906	16912	0.967	-0.631	1.03
NUPL2	-8.62	12	-1.32	0.0937	1137	0.914	0.906	16919	0.967	-0.384	1.03
INSR	-8.61	12	-1.32	0.0938	1138	0.914	0.906	16918	0.967	-0.356	1.03
SKA3	-8.6	12	-1.32	0.0941	1145	0.914	0.906	16911	0.967	-1.08	1.03
KIF9	-8.61	12	-1.32	0.0939	1141	0.914	0.906	16915	0.967	-0.335	1.03
HS6ST2	-8.6	12	-1.32	0.0942	1147	0.914	0.906	16909	0.967	-0.545	1.03
NAA30	-8.6	12	-1.32	0.0942	1148	0.914	0.906	16908	0.967	-0.302	1.03
NT5C1A	-8.61	12	-1.32	0.0941	1143	0.914	0.906	16913	0.967	-0.262	1.03
KDM1B	-8.59	12	-1.31	0.0944	1150	0.914	0.906	16906	0.967	-0.441	1.03
MAGED2	-8.59	12	-1.31	0.0947	1153	0.914	0.905	16903	0.967	-0.304	1.02
GRM2	-8.59	12	-1.31	0.0945	1151	0.914	0.905	16905	0.967	-0.457	1.02
SMARCAD1	-8.59	12	-1.31	0.0947	1155	0.914	0.905	16901	0.967	-0.399	1.02
CKAP2	-8.59	12	-1.31	0.0945	1152	0.914	0.905	16904	0.967	-0.454	1.02
UNCX	-8.58	12	-1.31	0.0948	1156	0.914	0.905	16900	0.967	-0.227	1.02
TSPAN4	-8.61	12	-1.32	0.094	1142	0.914	0.906	16914	0.967	-0.26	1.03
MMD	-8.56	12	-1.31	0.0955	1159	0.914	0.904	16897	0.966	-0.4	1.02
PIGW	-8.55	12	-1.31	0.0958	1161	0.914	0.904	16895	0.966	-0.472	1.02
COPG1	-8.58	12	-1.31	0.095	1157	0.914	0.905	16899	0.967	-1.059	1.02
NAA35	-8.51	12	-1.3	0.0974	1182	0.914	0.903	16874	0.966	-0.5	1.01
RING1	-8.59	12	-1.31	0.0947	1154	0.914	0.905	16902	0.967	-0.626	1.02
SMPD1	-8.55	12	-1.31	0.0959	1163	0.914	0.904	16893	0.966	-0.45	1.02
NUP153	-8.57	12	-1.31	0.0953	1158	0.914	0.905	16898	0.967	-0.518	1.02
ZEB2	-8.55	12	-1.31	0.0959	1162	0.914	0.904	16894	0.966	-0.326	1.02
SMPD3	-8.55	12	-1.3	0.096	1164	0.914	0.904	16892	0.966	-0.268	1.02
METTL14	-8.55	12	-1.3	0.096	1165	0.914	0.904	16891	0.966	-0.442	1.02
RBM26	-8.56	12	-1.31	0.0956	1160	0.914	0.904	16896	0.966	-0.579	1.02
MRPL28	-8.55	12	-1.3	0.096	1166	0.914	0.904	16890	0.966	-0.481	1.02
PKNOX1	-8.55	12	-1.3	0.0961	1167	0.914	0.904	16889	0.966	-0.296	1.02
TUBB3	-8.54	12	-1.3	0.0962	1168	0.914	0.904	16888	0.966	-0.415	1.02
BTBD7	-8.51	12	-1.3	0.0972	1177	0.914	0.903	16879	0.966	-0.352	1.01
HCK	-8.53	12	-1.3	0.0967	1171	0.914	0.903	16885	0.966	-0.363	1.01
MRPS10	-8.53	12	-1.3	0.0967	1170	0.914	0.903	16886	0.966	-0.303	1.01
NADSYN1	-8.53	12	-1.3	0.0967	1172	0.914	0.903	16884	0.966	-0.55	1.01
C17orf53	-8.52	12	-1.3	0.0969	1174	0.914	0.903	16882	0.966	-0.684	1.01
AUNIP	-8.53	12	-1.3	0.0966	1169	0.914	0.903	16887	0.966	-0.337	1.02
SSBP4	-8.52	12	-1.3	0.0969	1173	0.914	0.903	16883	0.966	-0.243	1.01
FAM178A	-8.51	12	-1.3	0.0972	1180	0.914	0.903	16876	0.966	-0.563	1.01
RBMS1	-8.51	12	-1.3	0.0971	1176	0.914	0.903	16880	0.966	-0.52	1.01
SMG9	-8.51	12	-1.3	0.0971	1175	0.914	0.903	16881	0.966	-0.332	1.01
EPM2AIP1	-8.5	12	-1.29	0.0977	1184	0.914	0.902	16872	0.966	-0.335	1.01
TP53INP2	-8.51	12	-1.3	0.0974	1183	0.914	0.903	16873	0.966	-0.333	1.01
PLAGL2	-8.51	12	-1.3	0.0973	1181	0.914	0.903	16875	0.966	-0.423	1.01
UBA5	-8.51	12	-1.3	0.0972	1178	0.914	0.903	16878	0.966	-0.476	1.01
COL1A1	-8.49	12	-1.29	0.098	1189	0.914	0.902	16867	0.966	-0.159	1.01
RALBP1	-8.5	12	-1.29	0.0978	1185	0.914	0.902	16871	0.966	-0.379	1.01
IMMT	-8.5	12	-1.29	0.0978	1186	0.914	0.902	16870	0.966	-0.153	1.01
PABPN1	-8.51	12	-1.3	0.0972	1179	0.914	0.903	16877	0.966	-0.346	1.01
ATP5SL	-8.49	12	-1.29	0.098	1188	0.914	0.902	16868	0.966	-0.325	1.01
LSM3	-8.49	12	-1.29	0.0981	1190	0.914	0.902	16866	0.966	-0.8	1.01
ARL4D	-8.49	12	-1.29	0.0979	1187	0.914	0.902	16869	0.966	-0.452	1.01
CILP2	-8.48	12	-1.29	0.0982	1192	0.914	0.902	16864	0.965	-0.517	1.01
U2SURP	-8.47	12	-1.29	0.0987	1194	0.914	0.901	16862	0.965	-0.339	1.01
PRDM13	-8.48	12	-1.29	0.0982	1191	0.914	0.902	16865	0.965	-0.394	1.01
NDRG4	-8.47	12	-1.29	0.0986	1193	0.914	0.901	16863	0.965	-0.363	1.01
CABP5	-8.47	12	-1.29	0.0987	1195	0.914	0.901	16861	0.965	-0.443	1.01
MRPS12	-8.45	12	-1.28	0.0994	1201	0.914	0.901	16855	0.965	-0.429	1
CD74	-8.46	12	-1.29	0.0992	1198	0.914	0.901	16858	0.965	-0.426	1
NUP98	-8.46	12	-1.29	0.099	1196	0.914	0.901	16860	0.965	-0.546	1
TRIP10	-8.46	12	-1.29	0.0992	1197	0.914	0.901	16859	0.965	-0.332	1
CACNG5	-8.45	12	-1.29	0.0994	1199	0.914	0.901	16857	0.965	-0.529	1
RNASEH1	-8.45	12	-1.29	0.0994	1200	0.914	0.901	16856	0.965	-0.379	1
ZNF148	-8.43	12	-1.28	0.1	1204	0.914	0.9	16852	0.964	-0.37	1
CLP1	-8.44	12	-1.28	0.0999	1203	0.914	0.9	16853	0.964	-0.887	1
FANCL	-8.44	12	-1.28	0.0998	1202	0.914	0.9	16854	0.964	-0.447	1
RBM4B	-8.43	12	-1.28	0.1	1205	0.914	0.9	16851	0.964	-0.513	1
DSCR3	-8.43	12	-1.28	0.1	1206	0.914	0.9	16850	0.964	-0.189	1
MIOS	-8.41	12	-1.28	0.101	1210	0.914	0.899	16846	0.964	-0.927	1
INPP5A	-8.42	12	-1.28	0.1	1208	0.914	0.9	16848	0.964	-0.504	1
PNPLA2	-8.4	12	-1.28	0.101	1215	0.914	0.899	16841	0.964	-0.411	1
TDRP	-8.42	12	-1.28	0.1	1207	0.914	0.9	16849	0.964	-0.542	1
FAM181B	-8.06	11	-1.28	0.101	1209	0.914	0.899	16847	0.964	-0.394	1
ZNF30	-8.41	12	-1.28	0.101	1213	0.914	0.899	16843	0.964	-0.327	1
UBE2I	-8.06	11	-1.28	0.101	1211	0.914	0.899	16845	0.964	-1.432	1
ACACA	-8.39	12	-1.27	0.102	1220	0.914	0.898	16836	0.963	-0.771	0.99
ATP5H	-8.38	12	-1.27	0.102	1222	0.914	0.898	16834	0.963	-0.681	0.99
PGM3	-8.4	12	-1.28	0.101	1216	0.914	0.899	16840	0.964	-0.457	1
MEA1	-8.41	12	-1.28	0.101	1212	0.914	0.899	16844	0.964	-0.265	1
WAC	-8.4	12	-1.28	0.101	1217	0.914	0.899	16839	0.964	-0.464	1
ZCCHC3	-8.4	12	-1.27	0.101	1218	0.914	0.899	16838	0.964	-0.444	1
WBP11	-8.04	11	-1.27	0.101	1219	0.914	0.899	16837	0.964	-0.519	1
FKBP6	-8.38	12	-1.27	0.102	1223	0.914	0.898	16833	0.963	-0.346	0.99
RAPGEFL1	-8.39	12	-1.27	0.102	1221	0.914	0.898	16835	0.963	-0.637	0.99
CHMP4A	-7.64	10	-1.27	0.102	1225	0.914	0.898	16831	0.963	-0.351	0.99
MCM3	-8.4	12	-1.28	0.101	1214	0.914	0.899	16842	0.964	-0.243	1
SH2B1	-8.36	12	-1.27	0.102	1228	0.914	0.898	16828	0.963	-0.392	0.99
MRPS21	-8.37	12	-1.27	0.102	1224	0.914	0.898	16832	0.963	-0.283	0.99
MZT2B	-8.36	12	-1.27	0.103	1229	0.914	0.897	16827	0.963	-0.271	0.99
THOC2	-8	11	-1.27	0.103	1231	0.914	0.897	16825	0.963	-0.7	0.99
ZNF317	-8.37	12	-1.27	0.102	1227	0.914	0.898	16829	0.963	-0.41	0.99
PLCD1	-8.35	12	-1.27	0.103	1233	0.914	0.897	16823	0.963	-0.23	0.99
SERTAD1	-8.37	12	-1.27	0.102	1226	0.914	0.898	16830	0.963	-0.086	0.99
MRPS14	-8.36	12	-1.27	0.103	1230	0.914	0.897	16826	0.963	-0.509	0.99
CHCHD3	-8.34	12	-1.26	0.103	1236	0.914	0.897	16820	0.963	-0.333	0.99
FAM196A	-8.36	12	-1.27	0.103	1232	0.914	0.897	16824	0.963	-0.545	0.99
LAPTM5	-8.35	12	-1.26	0.103	1235	0.914	0.897	16821	0.963	-0.489	0.99
NUBP1	-7.61	10	-1.26	0.103	1237	0.914	0.897	16819	0.963	-0.867	0.99
CLDN19	-8.35	12	-1.26	0.103	1234	0.914	0.897	16822	0.963	-0.432	0.99
PIGF	-8.32	12	-1.26	0.104	1241	0.914	0.896	16815	0.962	-0.519	0.98
TUBG1	-8.32	12	-1.26	0.104	1238	0.914	0.896	16818	0.962	-0.186	0.98
ZNF784	-8.32	12	-1.26	0.104	1239	0.914	0.896	16817	0.962	-0.494	0.98
TUBB	-8.32	12	-1.26	0.104	1240	0.914	0.896	16816	0.962	-0.988	0.98
IQCF3	-8.32	12	-1.26	0.104	1243	0.914	0.896	16813	0.962	-0.335	0.98
PTPRH	-8.29	12	-1.25	0.105	1253	0.914	0.895	16803	0.961	-0.348	0.98
PARN	-8.3	12	-1.26	0.105	1245	0.914	0.895	16811	0.962	-0.478	0.98
DYNC1I2	-8.31	12	-1.26	0.104	1244	0.914	0.896	16812	0.962	-1.567	0.98
MRPL37	-8.3	12	-1.25	0.105	1247	0.914	0.895	16809	0.962	-0.395	0.98
CTNND1	-8.32	12	-1.26	0.104	1242	0.914	0.896	16814	0.962	-0.597	0.98
SRF	-8.3	12	-1.26	0.105	1246	0.914	0.895	16810	0.962	-0.314	0.98
MUS81	-8.29	12	-1.25	0.105	1249	0.914	0.895	16807	0.962	-0.337	0.98
CCDC42	-8.28	12	-1.25	0.105	1254	0.914	0.895	16802	0.961	-0.106	0.98
PRRG4	-8.29	12	-1.25	0.105	1251	0.914	0.895	16805	0.962	-0.385	0.98
DECR1	-8.29	12	-1.25	0.105	1250	0.914	0.895	16806	0.962	-0.388	0.98
ACTR3	-8.29	12	-1.25	0.105	1252	0.914	0.895	16804	0.962	-1.692	0.98
MRPS18B	-8.27	12	-1.25	0.106	1256	0.914	0.894	16800	0.961	-0.696	0.97
CALD1	-8.27	12	-1.25	0.106	1257	0.914	0.894	16799	0.961	-0.597	0.97
BPNT1	-8.27	12	-1.25	0.106	1255	0.914	0.894	16801	0.961	-0.721	0.97
NELFA	-8.3	12	-1.25	0.105	1248	0.914	0.895	16808	0.962	-0.563	0.98
SEH1L	-8.24	12	-1.24	0.107	1265	0.914	0.893	16791	0.96	-0.47	0.97
DDB1	-8.25	12	-1.24	0.107	1261	0.914	0.893	16795	0.96	-0.768	0.97
SKOR2	-8.25	12	-1.25	0.106	1258	0.914	0.894	16798	0.96	-0.22	0.97
CRLS1	-8.21	12	-1.24	0.108	1279	0.914	0.892	16777	0.96	-0.356	0.97
JDP2	-8.25	12	-1.24	0.107	1260	0.914	0.893	16796	0.96	-0.161	0.97
NOS2	-8.25	12	-1.24	0.107	1259	0.914	0.893	16797	0.96	-0.349	0.97
FRAT1	-8.23	12	-1.24	0.107	1267	0.914	0.893	16789	0.96	-0.369	0.97
CHURC1	-8.24	12	-1.24	0.107	1264	0.914	0.893	16792	0.96	-0.47	0.97
HCFC1R1	-8.19	12	-1.23	0.109	1289	0.914	0.891	16767	0.959	-0.405	0.96
CHCHD1	-8.24	12	-1.24	0.107	1263	0.914	0.893	16793	0.96	-0.184	0.97
ARMC6	-8.23	12	-1.24	0.107	1268	0.914	0.893	16788	0.96	-0.372	0.97
CELSR3	-8.23	12	-1.24	0.107	1266	0.914	0.893	16790	0.96	-0.421	0.97
OR4K15	-8.23	12	-1.24	0.107	1269	0.914	0.893	16787	0.96	-0.052	0.97
HJURP	-8.22	12	-1.24	0.108	1270	0.914	0.892	16786	0.96	-0.47	0.97
SRSF1	-7.87	11	-1.24	0.108	1275	0.914	0.892	16781	0.96	-2.249	0.97
SRSF4	-8.22	12	-1.24	0.108	1273	0.914	0.892	16783	0.96	-0.34	0.97
GP1BB	-8.22	12	-1.24	0.108	1276	0.914	0.892	16780	0.96	-0.532	0.97
TLN1	-7.5	10	-1.24	0.108	1277	0.914	0.892	16779	0.96	-0.433	0.97
RFX4	-8.25	12	-1.24	0.107	1262	0.914	0.893	16794	0.96	-0.478	0.97
PPM1H	-8.19	12	-1.23	0.109	1286	0.914	0.891	16770	0.959	-0.679	0.96
FBXL6	-8.22	12	-1.24	0.108	1271	0.914	0.892	16785	0.96	-0.383	0.97
PPP2R5D	-8.2	12	-1.24	0.108	1280	0.914	0.892	16776	0.96	-0.419	0.97
SERPINA3	-8.22	12	-1.24	0.108	1272	0.914	0.892	16784	0.96	-0.419	0.97
MRPL46	-8.21	12	-1.24	0.108	1278	0.914	0.892	16778	0.96	-0.312	0.97
SPNS1	-8.22	12	-1.24	0.108	1274	0.914	0.892	16782	0.96	-0.449	0.97
ASH2L	-8.19	12	-1.23	0.109	1288	0.914	0.891	16768	0.959	-0.305	0.96
PMVK	-8.2	12	-1.24	0.108	1281	0.914	0.892	16775	0.96	-0.431	0.97
TGIF1	-8.19	12	-1.23	0.109	1287	0.914	0.891	16769	0.959	-0.642	0.96
SND1	-8.18	12	-1.23	0.109	1294	0.914	0.891	16762	0.959	-0.634	0.96
TRMT1	-8.19	12	-1.23	0.109	1284	0.914	0.891	16772	0.959	-0.268	0.96
MRPL13	-8.19	12	-1.23	0.109	1282	0.914	0.891	16774	0.959	-0.397	0.96
CRIP3	-8.18	12	-1.23	0.109	1290	0.914	0.891	16766	0.959	-0.247	0.96
BRF2	-8.18	12	-1.23	0.109	1299	0.914	0.891	16757	0.959	-0.967	0.96
GMNN	-8.18	12	-1.23	0.109	1295	0.914	0.891	16761	0.959	-0.532	0.96
THRSP	-8.18	12	-1.23	0.109	1291	0.914	0.891	16765	0.959	-0.551	0.96
ZNF280D	-8.17	12	-1.23	0.11	1300	0.914	0.89	16756	0.959	-0.064	0.96
CDC42	-7.09	9	-1.23	0.109	1283	0.914	0.891	16773	0.959	-2.115	0.96
TMEM258	-8.18	12	-1.23	0.109	1292	0.914	0.891	16764	0.959	-0.897	0.96
SMTNL2	-8.18	12	-1.23	0.109	1296	0.914	0.891	16760	0.959	-0.307	0.96
TIGD3	-8.18	12	-1.23	0.109	1298	0.914	0.891	16758	0.959	-0.298	0.96
CYP27B1	-8.18	12	-1.23	0.109	1297	0.914	0.891	16759	0.959	-0.402	0.96
RAPH1	-8.15	12	-1.23	0.11	1303	0.914	0.89	16753	0.959	-0.379	0.96
RAC1	-8.16	12	-1.23	0.11	1301	0.914	0.89	16755	0.959	-0.69	0.96
TNFRSF1B	-8.15	12	-1.23	0.11	1304	0.914	0.89	16752	0.959	-0.504	0.96
SBK1	-8.16	12	-1.23	0.11	1302	0.914	0.89	16754	0.959	-0.349	0.96
RPA1	-8.14	12	-1.22	0.111	1306	0.914	0.889	16750	0.959	-1.492	0.95
SLC4A1AP	-8.18	12	-1.23	0.109	1293	0.914	0.891	16763	0.959	-0.353	0.96
KANK3	-8.12	12	-1.22	0.111	1316	0.914	0.889	16740	0.958	-0.35	0.95
F10	-8.13	12	-1.22	0.111	1308	0.914	0.889	16748	0.959	-0.33	0.95
CDCA3	-8.19	12	-1.23	0.109	1285	0.914	0.891	16771	0.959	-0.478	0.96
TTI1	-8.14	12	-1.22	0.111	1305	0.914	0.889	16751	0.959	-0.555	0.95
KRT27	-8.14	12	-1.22	0.111	1307	0.914	0.889	16749	0.959	-0.352	0.95
DDX41	-8.13	12	-1.22	0.111	1309	0.914	0.889	16747	0.958	-0.778	0.95
FAM109B	-7.03	9	-1.22	0.111	1315	0.914	0.889	16741	0.958	-0.424	0.95
CD69	-8.12	12	-1.22	0.111	1312	0.914	0.889	16744	0.958	-0.405	0.95
CEP89	-8.12	12	-1.22	0.111	1311	0.914	0.889	16745	0.958	-0.272	0.95
FANCE	-8.12	12	-1.22	0.111	1310	0.914	0.889	16746	0.958	-0.383	0.95
C4orf46	-8.12	12	-1.22	0.111	1313	0.914	0.889	16743	0.958	-0.274	0.95
C15orf39	-8.1	12	-1.21	0.112	1325	0.914	0.888	16731	0.958	-0.34	0.95
C8orf82	-8.09	12	-1.21	0.112	1328	0.914	0.888	16728	0.958	-0.33	0.95
NDUFB10	-8.09	12	-1.21	0.112	1327	0.914	0.888	16729	0.958	-0.444	0.95
RASAL3	-8.11	12	-1.22	0.112	1319	0.914	0.888	16737	0.958	-0.3	0.95
MRPL51	-8.1	12	-1.22	0.112	1322	0.914	0.888	16734	0.958	-0.456	0.95
RPUSD3	-8.11	12	-1.22	0.112	1321	0.914	0.888	16735	0.958	-0.26	0.95
TRAF7	-8.12	12	-1.22	0.112	1317	0.914	0.888	16739	0.958	-0.681	0.95
TRIM43	-8.11	12	-1.22	0.112	1318	0.914	0.888	16738	0.958	-0.186	0.95
BEST4	-8.09	12	-1.21	0.113	1334	0.914	0.887	16722	0.958	-0.352	0.95
RAB6C	-8.12	12	-1.22	0.111	1314	0.914	0.889	16742	0.958	-0.421	0.95
E2F7	-8.1	12	-1.21	0.112	1326	0.914	0.888	16730	0.958	-0.394	0.95
ANKFY1	-8.09	12	-1.21	0.113	1330	0.914	0.887	16726	0.958	-0.413	0.95
ACTL9	-8.1	12	-1.22	0.112	1324	0.914	0.888	16732	0.958	-0.404	0.95
SFTPC	-8.1	12	-1.22	0.112	1323	0.914	0.888	16733	0.958	-0.339	0.95
RPN1	-8.09	12	-1.21	0.113	1332	0.914	0.887	16724	0.958	-0.894	0.95
RNF20	-8.09	12	-1.21	0.112	1329	0.914	0.888	16727	0.958	-0.379	0.95
RHPN1	-8.09	12	-1.21	0.113	1333	0.914	0.887	16723	0.958	-0.392	0.95
FAM205A	-8.09	12	-1.21	0.113	1331	0.914	0.887	16725	0.958	-0.605	0.95
PRKAR1A	-8.11	12	-1.22	0.112	1320	0.914	0.888	16736	0.958	-0.808	0.95
RERE	-8.08	12	-1.21	0.113	1335	0.914	0.887	16721	0.958	-0.29	0.95
SCIMP	-8.07	12	-1.21	0.113	1336	0.914	0.887	16720	0.958	-0.611	0.95
DNAJC14	-8.07	12	-1.21	0.113	1338	0.914	0.887	16718	0.958	-0.526	0.95
SIRT5	-8.07	12	-1.21	0.113	1337	0.914	0.887	16719	0.958	-0.468	0.95
ATF7IP	-8.04	12	-1.2	0.115	1348	0.914	0.885	16708	0.957	-0.306	0.94
IQGAP2	-8.02	12	-1.2	0.115	1354	0.914	0.885	16702	0.957	-0.324	0.94
ACTN4	-8.05	12	-1.21	0.114	1342	0.914	0.886	16714	0.957	-0.408	0.94
TLE2	-8.04	12	-1.2	0.114	1344	0.914	0.886	16712	0.957	-0.423	0.94
FBLN7	-8.05	12	-1.21	0.114	1340	0.914	0.886	16716	0.957	-0.335	0.94
SETD6	-8.05	12	-1.2	0.114	1343	0.914	0.886	16713	0.957	-0.432	0.94
SLC25A3	-8.04	12	-1.2	0.114	1345	0.914	0.886	16711	0.957	-0.589	0.94
FXN	-8.04	12	-1.2	0.114	1346	0.914	0.886	16710	0.957	-1.17	0.94
PLEKHG2	-8.04	12	-1.2	0.114	1347	0.914	0.886	16709	0.957	-0.335	0.94
BAAT	-8.04	12	-1.2	0.115	1349	0.914	0.885	16707	0.957	-0.345	0.94
CEP57	-8.05	12	-1.21	0.114	1341	0.914	0.886	16715	0.957	-0.417	0.94
DMAP1	-8.02	12	-1.2	0.115	1353	0.914	0.885	16703	0.957	-0.241	0.94
HNRNPA3	-8.03	12	-1.2	0.115	1351	0.914	0.885	16705	0.957	-0.133	0.94
PLEC	-8.06	12	-1.21	0.114	1339	0.914	0.886	16717	0.957	-0.249	0.94
COQ3	-8.02	12	-1.2	0.115	1352	0.914	0.885	16704	0.957	-0.58	0.94
MRPL45	-8.01	12	-1.2	0.115	1356	0.914	0.885	16700	0.956	-0.392	0.94
SKI	-8.03	12	-1.2	0.115	1350	0.914	0.885	16706	0.957	-0.389	0.94
CNOT11	-8.01	12	-1.2	0.115	1355	0.914	0.885	16701	0.956	-0.399	0.94
RTP1	-8.01	12	-1.2	0.116	1360	0.914	0.884	16696	0.956	-0.455	0.94
ATF6B	-8.01	12	-1.2	0.116	1357	0.914	0.884	16699	0.956	-0.35	0.94
FZR1	-8	12	-1.2	0.116	1361	0.914	0.884	16695	0.956	-0.396	0.94
CHD1	-8.01	12	-1.2	0.116	1358	0.914	0.884	16698	0.956	-0.225	0.94
HIST1H1D	-8.01	12	-1.2	0.116	1359	0.914	0.884	16697	0.956	-0.415	0.94
ARL2	-8	12	-1.2	0.116	1362	0.914	0.884	16694	0.956	-1.253	0.94
GPR137	-7.98	12	-1.19	0.117	1371	0.914	0.883	16685	0.956	-0.429	0.93
GIP	-8	12	-1.2	0.116	1365	0.914	0.884	16691	0.956	-0.567	0.94
SAP18	-8	12	-1.2	0.116	1363	0.914	0.884	16693	0.956	-0.945	0.94
SLFNL1	-7.99	12	-1.19	0.116	1366	0.914	0.884	16690	0.956	-0.424	0.94
C1QTNF1	-7.98	12	-1.19	0.117	1370	0.914	0.883	16686	0.956	-0.406	0.93
BCL6B	-7.98	12	-1.19	0.117	1368	0.914	0.883	16688	0.956	-0.528	0.93
TPRX2P	-7.99	12	-1.19	0.116	1367	0.914	0.884	16689	0.956	-0.442	0.94
PPFIA1	-7.91	12	-1.18	0.119	1404	0.914	0.881	16652	0.955	-0.55	0.92
OR4C5	-7.98	12	-1.19	0.117	1369	0.914	0.883	16687	0.956	-0.407	0.93
UROC1	-7.97	12	-1.19	0.117	1377	0.914	0.883	16679	0.956	-0.315	0.93
C10orf53	-7.97	12	-1.19	0.117	1374	0.914	0.883	16682	0.956	-0.464	0.93
BAZ2A	-7.97	12	-1.19	0.117	1372	0.914	0.883	16684	0.956	-0.064	0.93
BCAS2	-7.97	12	-1.19	0.117	1373	0.914	0.883	16683	0.956	-0.669	0.93
APLP1	-7.96	12	-1.19	0.117	1378	0.914	0.883	16678	0.955	-0.444	0.93
MRPS23	-7.97	12	-1.19	0.117	1375	0.914	0.883	16681	0.956	-0.295	0.93
GTF2E2	-7.95	12	-1.19	0.118	1389	0.914	0.882	16667	0.955	-0.877	0.93
TMEM70	-7.97	12	-1.19	0.117	1376	0.914	0.883	16680	0.956	-0.566	0.93
IGF1R	-7.95	12	-1.18	0.118	1390	0.914	0.882	16666	0.955	-0.603	0.93
SERPINE3	-7.94	12	-1.18	0.118	1393	0.914	0.882	16663	0.955	-0.32	0.93
RNPS1	-7.95	12	-1.19	0.118	1380	0.914	0.882	16676	0.955	-0.505	0.93
PLEKHG5	-7.95	12	-1.19	0.118	1381	0.914	0.882	16675	0.955	-0.299	0.93
FUT2	-7.95	12	-1.19	0.118	1383	0.914	0.882	16673	0.955	-0.411	0.93
MTCH2	-7.96	12	-1.19	0.118	1379	0.914	0.882	16677	0.955	-0.438	0.93
KAT2A	-7.95	12	-1.19	0.118	1382	0.914	0.882	16674	0.955	-0.367	0.93
ZNF777	-6.93	9	-1.2	0.116	1364	0.914	0.884	16692	0.956	-0.195	0.94
PM20D1	-7.95	12	-1.19	0.118	1384	0.914	0.882	16672	0.955	-0.352	0.93
MANBAL	-7.95	12	-1.19	0.118	1385	0.914	0.882	16671	0.955	-0.433	0.93
METTL6	-7.95	12	-1.19	0.118	1386	0.914	0.882	16670	0.955	-0.389	0.93
MRE11A	-7.95	12	-1.18	0.118	1391	0.914	0.882	16665	0.955	-0.519	0.93
NMS	-7.95	12	-1.19	0.118	1388	0.914	0.882	16668	0.955	-0.33	0.93
VDAC1	-7.94	12	-1.18	0.118	1392	0.914	0.882	16664	0.955	-0.387	0.93
UGP2	-7.92	12	-1.18	0.119	1398	0.914	0.881	16658	0.955	-0.171	0.92
ESPN	-7.95	12	-1.19	0.118	1387	0.914	0.882	16669	0.955	-0.28	0.93
TBL1XR1	-7.92	12	-1.18	0.119	1401	0.914	0.881	16655	0.955	-0.916	0.92
TEAD1	-7.93	12	-1.18	0.119	1394	0.914	0.881	16662	0.955	-0.493	0.92
NLRP1	-7.92	12	-1.18	0.119	1399	0.914	0.881	16657	0.955	-0.365	0.92
CCNK	-7.93	12	-1.18	0.119	1395	0.914	0.881	16661	0.955	-0.605	0.92
DDX46	-7.92	12	-1.18	0.119	1397	0.914	0.881	16659	0.955	-1.468	0.92
ARHGAP28	-7.93	12	-1.18	0.119	1396	0.914	0.881	16660	0.955	-0.226	0.92
ZNF791	-7.91	12	-1.18	0.119	1405	0.914	0.881	16651	0.955	-0.256	0.92
ANGPTL6	-7.92	12	-1.18	0.119	1400	0.914	0.881	16656	0.955	-0.281	0.92
ROGDI	-7.92	12	-1.18	0.119	1403	0.914	0.881	16653	0.955	-0.483	0.92
LIN7C	-7.9	12	-1.18	0.12	1407	0.914	0.88	16649	0.955	-0.448	0.92
EARS2	-7.89	12	-1.17	0.12	1411	0.914	0.88	16645	0.954	-0.384	0.92
DCP2	-7.91	12	-1.18	0.12	1406	0.914	0.88	16650	0.955	-0.402	0.92
PPT2	-7.9	12	-1.18	0.12	1409	0.914	0.88	16647	0.954	-0.334	0.92
MSH5	-7.9	12	-1.18	0.12	1408	0.914	0.88	16648	0.954	-0.466	0.92
DDX1	-7.58	11	-1.18	0.119	1402	0.914	0.881	16654	0.955	-0.614	0.92
TSEN2	-7.89	12	-1.17	0.12	1413	0.914	0.88	16643	0.954	-0.845	0.92
COMMD9	-7.89	12	-1.17	0.12	1412	0.914	0.88	16644	0.954	-0.462	0.92
B4GALT3	-7.88	12	-1.17	0.121	1417	0.914	0.879	16639	0.954	-0.506	0.92
FNBP4	-7.86	12	-1.17	0.121	1428	0.914	0.879	16628	0.954	-0.205	0.92
RNF41	-7.89	12	-1.17	0.12	1414	0.914	0.88	16642	0.954	-0.291	0.92
PDHB	-7.89	12	-1.17	0.12	1415	0.914	0.88	16641	0.954	-0.358	0.92
SUV420H2	-7.88	12	-1.17	0.121	1416	0.914	0.879	16640	0.954	-0.518	0.92
KLHDC7A	-7.88	12	-1.17	0.121	1419	0.914	0.879	16637	0.954	-0.353	0.92
HEG1	-7.9	12	-1.17	0.12	1410	0.914	0.88	16646	0.954	-0.585	0.92
TMX2	-7.87	12	-1.17	0.121	1426	0.914	0.879	16630	0.954	-0.227	0.92
PDLIM1	-7.88	12	-1.17	0.121	1418	0.914	0.879	16638	0.954	-0.273	0.92
EXOC4	-7.87	12	-1.17	0.121	1422	0.914	0.879	16634	0.954	-0.773	0.92
SMC5	-7.87	12	-1.17	0.121	1420	0.914	0.879	16636	0.954	-1.187	0.92
KDM8	-7.87	12	-1.17	0.121	1421	0.914	0.879	16635	0.954	-0.412	0.92
TIAL1	-7.87	12	-1.17	0.121	1425	0.914	0.879	16631	0.954	-0.457	0.92
SNRPB2	-6.8	9	-1.16	0.122	1435	0.914	0.878	16621	0.954	-0.398	0.91
PBX2	-7.86	12	-1.17	0.121	1427	0.914	0.879	16629	0.954	-0.463	0.92
DAP	-7.87	12	-1.17	0.121	1424	0.914	0.879	16632	0.954	-0.308	0.92
CREB3L3	-7.83	12	-1.16	0.123	1442	0.914	0.877	16614	0.954	-0.158	0.91
NUDT3	-7.87	12	-1.17	0.121	1423	0.914	0.879	16633	0.954	-0.532	0.92
ATP6V0A4	-7.86	12	-1.17	0.121	1429	0.914	0.879	16627	0.954	-0.324	0.92
OPRD1	-7.85	12	-1.17	0.122	1433	0.914	0.878	16623	0.954	-0.527	0.91
MRPL49	-7.86	12	-1.17	0.122	1430	0.914	0.878	16626	0.954	-0.38	0.91
ISM2	-7.86	12	-1.17	0.122	1431	0.914	0.878	16625	0.954	-0.307	0.91
NDUFB7	-7.85	12	-1.17	0.122	1432	0.914	0.878	16624	0.954	-0.263	0.91
ZBTB38	-7.85	12	-1.17	0.122	1434	0.914	0.878	16622	0.954	-0.339	0.91
PCDH1	-7.85	12	-1.16	0.122	1437	0.914	0.878	16619	0.954	-0.489	0.91
GDNF	-7.84	12	-1.16	0.122	1438	0.914	0.878	16618	0.954	-0.396	0.91
PELI3	-7.84	12	-1.16	0.122	1439	0.914	0.878	16617	0.954	-0.317	0.91
MON1A	-7.84	12	-1.16	0.122	1441	0.914	0.878	16615	0.954	-0.435	0.91
SCFD1	-7.85	12	-1.16	0.122	1436	0.914	0.878	16620	0.954	-0.367	0.91
LSMEM2	-7.84	12	-1.16	0.122	1440	0.914	0.878	16616	0.954	-0.514	0.91
CR2	-6.77	9	-1.16	0.123	1443	0.914	0.877	16613	0.953	-0.219	0.91
PHF23	-7.8	12	-1.15	0.124	1453	0.914	0.876	16603	0.952	-0.341	0.91
KIAA2013	-7.81	12	-1.16	0.124	1445	0.914	0.876	16611	0.953	-0.241	0.91
VKORC1L1	-7.82	12	-1.16	0.123	1444	0.914	0.877	16612	0.953	-0.502	0.91
DENND4A	-7.8	12	-1.16	0.124	1451	0.914	0.876	16605	0.952	-0.523	0.91
MBTPS1	-7.8	12	-1.15	0.124	1452	0.914	0.876	16604	0.952	-0.611	0.91
MRPS2	-7.8	12	-1.16	0.124	1449	0.914	0.876	16607	0.952	-0.3	0.91
EPAS1	-7.8	12	-1.16	0.124	1447	0.914	0.876	16609	0.952	-0.327	0.91
C2	-7.8	12	-1.16	0.124	1448	0.914	0.876	16608	0.952	-0.153	0.91
MRPL53	-7.81	12	-1.16	0.124	1446	0.914	0.876	16610	0.953	-0.506	0.91
MYO1H	-7.79	12	-1.15	0.124	1455	0.914	0.876	16601	0.952	-0.314	0.91
TTC7A	-7.79	12	-1.15	0.124	1458	0.914	0.876	16598	0.952	-0.391	0.91
SLC12A3	-7.79	12	-1.15	0.124	1456	0.914	0.876	16600	0.952	-0.224	0.91
SEC22C	-7.79	12	-1.15	0.124	1454	0.914	0.876	16602	0.952	-0.098	0.91
EFCAB10	-7.79	12	-1.15	0.124	1457	0.914	0.876	16599	0.952	-0.634	0.91
CCDC127	-7.8	12	-1.16	0.124	1450	0.914	0.876	16606	0.952	-0.333	0.91
KIF19	-7.78	12	-1.15	0.125	1459	0.914	0.875	16597	0.952	-0.347	0.9
HS6ST1	-7.77	12	-1.15	0.125	1468	0.914	0.875	16588	0.952	-0.38	0.9
PARD6B	-7.78	12	-1.15	0.125	1460	0.914	0.875	16596	0.952	-0.313	0.9
MBOAT7	-7.78	12	-1.15	0.125	1461	0.914	0.875	16595	0.952	-0.49	0.9
PPP1R35	-7.78	12	-1.15	0.125	1462	0.914	0.875	16594	0.952	-0.57	0.9
C20orf27	-7.78	12	-1.15	0.125	1463	0.914	0.875	16593	0.952	-0.083	0.9
NUP188	-7.77	12	-1.15	0.125	1464	0.914	0.875	16592	0.952	-0.467	0.9
ACTN2	-7.77	12	-1.15	0.125	1469	0.914	0.875	16587	0.952	-0.45	0.9
RASL11A	-7.77	12	-1.15	0.125	1465	0.914	0.875	16591	0.952	-0.472	0.9
MBNL1	-7.76	12	-1.15	0.126	1474	0.914	0.874	16582	0.952	-0.288	0.9
NKD2	-7.76	12	-1.15	0.126	1476	0.914	0.874	16580	0.952	-0.39	0.9
LRRC4B	-7.77	12	-1.15	0.125	1467	0.914	0.875	16589	0.952	-0.251	0.9
ACD	-7.77	12	-1.15	0.125	1470	0.914	0.875	16586	0.952	-0.521	0.9
CCDC120	-7.76	12	-1.15	0.126	1475	0.914	0.874	16581	0.952	-0.297	0.9
EFHB	-7.77	12	-1.15	0.125	1466	0.914	0.875	16590	0.952	-0.077	0.9
GTF3C1	-7.76	12	-1.15	0.126	1473	0.914	0.874	16583	0.952	-0.627	0.9
MICALL2	-7.75	12	-1.15	0.126	1479	0.914	0.874	16577	0.952	-0.225	0.9
POU2F3	-7.75	12	-1.14	0.126	1480	0.914	0.874	16576	0.952	-0.402	0.9
SNAPC4	-7.73	12	-1.14	0.127	1486	0.914	0.873	16570	0.952	-0.855	0.9
FOXB2	-7.76	12	-1.15	0.126	1477	0.914	0.874	16579	0.952	-0.445	0.9
UBN1	-7.76	12	-1.15	0.126	1478	0.914	0.874	16578	0.952	-0.67	0.9
FAM53C	-7.77	12	-1.15	0.125	1471	0.914	0.875	16585	0.952	-0.194	0.9
LRRC41	-7.72	12	-1.14	0.127	1491	0.914	0.873	16565	0.951	-0.191	0.9
DLST	-7.73	12	-1.14	0.127	1487	0.914	0.873	16569	0.952	-0.388	0.9
MEIS1	-7.76	12	-1.15	0.126	1472	0.914	0.874	16584	0.952	-0.199	0.9
ENDOD1	-7.74	12	-1.14	0.126	1481	0.914	0.874	16575	0.952	-0.722	0.9
CTNS	-7.74	12	-1.14	0.126	1482	0.914	0.874	16574	0.952	-0.381	0.9
VTI1B	-7.74	12	-1.14	0.126	1483	0.914	0.874	16573	0.952	-0.369	0.9
MAP7D3	-7.74	12	-1.14	0.126	1485	0.914	0.874	16571	0.952	-0.46	0.9
MCMBP	-7.74	12	-1.14	0.126	1484	0.914	0.874	16572	0.952	-0.616	0.9
C8orf33	-7.71	12	-1.14	0.128	1502	0.914	0.872	16554	0.951	-0.287	0.89
VPS13D	-7.73	12	-1.14	0.127	1490	0.914	0.873	16566	0.951	-0.411	0.9
EDIL3	-7.72	12	-1.14	0.127	1493	0.914	0.873	16563	0.951	-0.468	0.9
C17orf47	-7.73	12	-1.14	0.127	1489	0.914	0.873	16567	0.951	-0.305	0.9
RNF217	-7.73	12	-1.14	0.127	1488	0.914	0.873	16568	0.951	-0.433	0.9
GATAD2A	-7.72	12	-1.14	0.127	1495	0.914	0.873	16561	0.951	-0.39	0.9
PLTP	-7.72	12	-1.14	0.127	1492	0.914	0.873	16564	0.951	-0.363	0.9
RETN	-6.69	9	-1.14	0.127	1496	0.914	0.873	16560	0.951	-0.232	0.9
GTF3C4	-6.3	8	-1.14	0.127	1494	0.914	0.873	16562	0.951	-1.098	0.9
LIPT1	-7.71	12	-1.14	0.128	1497	0.914	0.872	16559	0.951	-0.318	0.89
RFC2	-7.71	12	-1.14	0.128	1501	0.914	0.872	16555	0.951	-0.875	0.89
BANP	-6.67	9	-1.14	0.128	1499	0.914	0.872	16557	0.951	-0.866	0.89
HOGA1	-7.71	12	-1.14	0.128	1500	0.914	0.872	16556	0.951	-0.446	0.89
CENPC	-7.7	12	-1.14	0.128	1503	0.914	0.872	16553	0.951	-0.484	0.89
BCL9L	-6.67	9	-1.14	0.128	1504	0.914	0.872	16552	0.951	-0.228	0.89
OXT	-7.7	12	-1.14	0.128	1505	0.914	0.872	16551	0.951	-0.46	0.89
MED17	-7.69	12	-1.13	0.128	1507	0.914	0.872	16549	0.951	-1.183	0.89
PAFAH1B1	-7.7	12	-1.14	0.128	1506	0.914	0.872	16550	0.951	-0.895	0.89
MRPL3	-7.69	12	-1.13	0.128	1510	0.914	0.872	16546	0.951	-0.385	0.89
NARG2	-7.71	12	-1.14	0.128	1498	0.914	0.872	16558	0.951	-0.394	0.89
MIB2	-7.69	12	-1.13	0.128	1509	0.914	0.872	16547	0.951	-0.438	0.89
SF3B5	-7.69	12	-1.13	0.128	1508	0.914	0.872	16548	0.951	-0.921	0.89
TERF2	-7.68	12	-1.13	0.129	1513	0.914	0.871	16543	0.951	-0.323	0.89
SIRT7	-7.67	12	-1.13	0.129	1514	0.914	0.871	16542	0.951	-0.574	0.89
EFNB3	-7.69	12	-1.13	0.129	1511	0.914	0.871	16545	0.951	-0.398	0.89
NCBP2	-7.69	12	-1.13	0.129	1512	0.914	0.871	16544	0.951	-1.479	0.89
DHPS	-7.66	12	-1.13	0.13	1518	0.914	0.87	16538	0.95	-1.415	0.89
DNM1L	-7.66	12	-1.13	0.13	1521	0.914	0.87	16535	0.95	-0.298	0.89
CAPN1	-7.67	12	-1.13	0.129	1516	0.914	0.871	16540	0.95	-0.433	0.89
BCAS4	-7.67	12	-1.13	0.129	1515	0.914	0.871	16541	0.951	-0.303	0.89
RAB43	-7.66	12	-1.13	0.13	1523	0.914	0.87	16533	0.95	-0.432	0.89
NANOS3	-7.66	12	-1.13	0.13	1517	0.914	0.87	16539	0.95	-0.457	0.89
MYCBP	-7.66	12	-1.13	0.13	1524	0.914	0.87	16532	0.95	-0.523	0.89
LDHB	-7.66	12	-1.13	0.13	1520	0.914	0.87	16536	0.95	-0.297	0.89
IBA57	-7.66	12	-1.13	0.13	1519	0.914	0.87	16537	0.95	-0.336	0.89
PTAR1	-7.65	12	-1.13	0.13	1525	0.914	0.87	16531	0.95	-0.4	0.89
HMGXB3	-7.62	12	-1.12	0.132	1538	0.914	0.868	16518	0.949	-0.555	0.88
HEBP2	-7.66	12	-1.13	0.13	1522	0.914	0.87	16534	0.95	-0.442	0.89
MRPL18	-7.62	12	-1.12	0.131	1534	0.914	0.869	16522	0.949	-0.331	0.88
STRIP1	-7.63	12	-1.12	0.131	1528	0.914	0.869	16528	0.949	-0.578	0.88
UNC45A	-7.61	12	-1.12	0.132	1540	0.914	0.868	16516	0.949	-0.465	0.88
SRD5A3	-7.63	12	-1.12	0.131	1530	0.914	0.869	16526	0.949	-0.494	0.88
CCDC132	-7.64	12	-1.12	0.131	1526	0.914	0.869	16530	0.95	-0.349	0.88
MDK	-7.63	12	-1.12	0.131	1529	0.914	0.869	16527	0.949	-0.293	0.88
MIIP	-7.61	12	-1.12	0.132	1539	0.914	0.868	16517	0.949	-0.307	0.88
FFAR1	-7.62	12	-1.12	0.131	1537	0.914	0.869	16519	0.949	-0.298	0.88
PCDH17	-7.64	12	-1.12	0.131	1527	0.914	0.869	16529	0.95	-0.51	0.88
HHAT	-7.62	12	-1.12	0.131	1532	0.914	0.869	16524	0.949	-0.385	0.88
HMCES	-7.62	12	-1.12	0.131	1533	0.914	0.869	16523	0.949	-0.338	0.88
LMNB2	-7.62	12	-1.12	0.131	1536	0.914	0.869	16520	0.949	-0.329	0.88
C11orf87	-7.61	12	-1.12	0.132	1543	0.914	0.868	16513	0.949	-0.311	0.88
PPP1R32	-7.61	12	-1.12	0.132	1544	0.914	0.868	16512	0.949	-0.381	0.88
UQCRH	-7.63	12	-1.12	0.131	1531	0.914	0.869	16525	0.949	-0.501	0.88
GLTP	-7.61	12	-1.12	0.132	1542	0.914	0.868	16514	0.949	-0.215	0.88
TP53BP2	-7.6	12	-1.12	0.132	1545	0.914	0.868	16511	0.949	-0.399	0.88
MAGOH	-6.95	10	-1.12	0.132	1541	0.914	0.868	16515	0.949	-1.691	0.88
DPY19L2	-7.62	12	-1.12	0.131	1535	0.914	0.869	16521	0.949	-0.577	0.88
MRPL41	-7.6	12	-1.12	0.132	1546	0.914	0.868	16510	0.949	-0.523	0.88
TTPAL	-7.6	12	-1.11	0.132	1548	0.914	0.868	16508	0.949	-0.289	0.88
PERP	-7.59	12	-1.11	0.133	1551	0.914	0.867	16505	0.949	-0.23	0.88
SLC22A18	-7.6	12	-1.12	0.132	1547	0.914	0.868	16509	0.949	-0.444	0.88
PPP2R5B	-7.59	12	-1.11	0.133	1550	0.914	0.867	16506	0.949	-0.381	0.88
C9orf9	-7.58	12	-1.11	0.133	1552	0.914	0.867	16504	0.948	-0.31	0.88
XRCC5	-7.59	12	-1.11	0.133	1549	0.914	0.867	16507	0.949	-1.193	0.88
PSTK	-7.58	12	-1.11	0.133	1554	0.914	0.867	16502	0.948	-0.135	0.88
SMYD2	-7.58	12	-1.11	0.133	1553	0.914	0.867	16503	0.948	-0.639	0.88
MAG	-7.57	12	-1.11	0.134	1559	0.914	0.866	16497	0.948	-0.231	0.87
MRPL48	-7.56	12	-1.11	0.134	1562	0.914	0.866	16494	0.948	-0.485	0.87
HNRNPAB	-7.57	12	-1.11	0.134	1557	0.914	0.866	16499	0.948	-0.27	0.87
NFASC	-7.57	12	-1.11	0.134	1556	0.914	0.866	16500	0.948	-0.262	0.87
EPO	-7.57	12	-1.11	0.134	1555	0.914	0.866	16501	0.948	-0.272	0.87
TIGD6	-7.56	12	-1.11	0.134	1560	0.914	0.866	16496	0.948	-0.338	0.87
SLC35B2	-7.53	12	-1.1	0.135	1573	0.914	0.865	16483	0.947	-0.364	0.87
BTBD2	-7.55	12	-1.11	0.134	1566	0.914	0.866	16490	0.948	-0.596	0.87
JUP	-7.55	12	-1.11	0.135	1569	0.914	0.865	16487	0.948	-0.377	0.87
ZC3H3	-7.56	12	-1.11	0.134	1561	0.914	0.866	16495	0.948	-0.427	0.87
CCDC53	-7.23	11	-1.11	0.134	1568	0.914	0.866	16488	0.948	-0.484	0.87
AGT	-7.56	12	-1.11	0.134	1563	0.914	0.866	16493	0.948	-0.361	0.87
APEH	-7.56	12	-1.11	0.134	1564	0.914	0.866	16492	0.948	-0.303	0.87
GBP1	-7.55	12	-1.11	0.134	1567	0.914	0.866	16489	0.948	-0.512	0.87
LY6G6C	-7.54	12	-1.1	0.135	1570	0.914	0.865	16486	0.948	-0.367	0.87
KHDC3L	-7.54	12	-1.1	0.135	1571	0.914	0.865	16485	0.947	-0.221	0.87
MAGOHB	-7.57	12	-1.11	0.134	1558	0.914	0.866	16498	0.948	-0.506	0.87
DVL2	-7.53	12	-1.1	0.135	1575	0.914	0.865	16481	0.947	-0.471	0.87
TKTL1	-7.53	12	-1.1	0.135	1572	0.914	0.865	16484	0.947	-0.166	0.87
MRPL12	-7.53	12	-1.1	0.135	1574	0.914	0.865	16482	0.947	-0.492	0.87
SNRNP200	-7.52	12	-1.1	0.136	1576	0.914	0.864	16480	0.947	-0.886	0.87
NSUN4	-7.55	12	-1.11	0.134	1565	0.914	0.866	16491	0.948	-0.333	0.87
RMND5A	-7.51	12	-1.1	0.136	1580	0.914	0.864	16476	0.947	-0.24	0.87
MRPL36	-7.52	12	-1.1	0.136	1578	0.914	0.864	16478	0.947	-0.321	0.87
PA2G4	-7.52	12	-1.1	0.136	1577	0.914	0.864	16479	0.947	-0.604	0.87
TTLL3	-7.51	12	-1.1	0.136	1581	0.914	0.864	16475	0.947	-0.37	0.87
CCDC87	-7.51	12	-1.1	0.136	1579	0.914	0.864	16477	0.947	-0.383	0.87
GPATCH8	-7.51	12	-1.1	0.136	1584	0.914	0.864	16472	0.947	-0.669	0.87
SSB	-7.51	12	-1.1	0.136	1582	0.914	0.864	16474	0.947	-0.63	0.87
PPAP2C	-7.51	12	-1.1	0.136	1583	0.914	0.864	16473	0.947	-0.312	0.87
LSM11	-7.5	12	-1.1	0.137	1585	0.914	0.863	16471	0.947	-0.241	0.86
CHTF18	-7.5	12	-1.09	0.137	1589	0.914	0.863	16467	0.946	-0.387	0.86
BTBD18	-7.48	12	-1.09	0.137	1600	0.914	0.863	16456	0.946	-0.27	0.86
SFRP2	-7.5	12	-1.09	0.137	1588	0.914	0.863	16468	0.946	-0.332	0.86
CHCHD4	-7.49	12	-1.09	0.137	1593	0.914	0.863	16463	0.946	-0.329	0.86
CATSPERD	-7.5	12	-1.1	0.137	1587	0.914	0.863	16469	0.946	-0.376	0.86
CREBBP	-7.48	12	-1.09	0.137	1597	0.914	0.863	16459	0.946	-0.216	0.86
RER1	-7.48	12	-1.09	0.137	1599	0.914	0.863	16457	0.946	-0.474	0.86
RPL19	-7.49	12	-1.09	0.137	1592	0.914	0.863	16464	0.946	-0.812	0.86
PRICKLE4	-7.47	12	-1.09	0.138	1602	0.914	0.862	16454	0.946	-0.32	0.86
GCN1L1	-7.5	12	-1.1	0.137	1586	0.914	0.863	16470	0.946	-0.618	0.86
PRIM1	-7.49	12	-1.09	0.137	1591	0.914	0.863	16465	0.946	-1.138	0.86
MAD2L1	-7.48	12	-1.09	0.137	1596	0.914	0.863	16460	0.946	-0.419	0.86
BLACE	-7.44	12	-1.08	0.139	1618	0.914	0.861	16438	0.945	-0.24	0.86
ARHGEF15	-7.47	12	-1.09	0.138	1604	0.914	0.862	16452	0.946	-0.4	0.86
C6orf136	-7.48	12	-1.09	0.137	1595	0.914	0.863	16461	0.946	-0.355	0.86
P2RX7	-7.48	12	-1.09	0.137	1598	0.914	0.863	16458	0.946	-0.331	0.86
CRAT	-7.48	12	-1.09	0.138	1601	0.914	0.862	16455	0.946	-0.444	0.86
TMEM150A	-7.47	12	-1.09	0.138	1609	0.914	0.862	16447	0.946	-0.392	0.86
B3GNT1	-7.47	12	-1.09	0.138	1603	0.914	0.862	16453	0.946	-0.322	0.86
DCAF15	-7.49	12	-1.09	0.137	1590	0.914	0.863	16466	0.946	-0.309	0.86
OPA3	-6.47	9	-1.09	0.138	1605	0.914	0.862	16451	0.946	-0.213	0.86
TMIE	-7.47	12	-1.09	0.138	1608	0.914	0.862	16448	0.946	-0.148	0.86
GRN	-7.46	12	-1.09	0.138	1610	0.914	0.862	16446	0.946	-0.313	0.86
ADCYAP1	-7.46	12	-1.09	0.138	1611	0.914	0.862	16445	0.946	-0.356	0.86
RXRG	-7.49	12	-1.09	0.137	1594	0.914	0.863	16462	0.946	-0.378	0.86
MRPS22	-7.43	12	-1.08	0.14	1621	0.914	0.86	16435	0.945	-0.219	0.85
PRPF38A	-6.82	10	-1.09	0.138	1606	0.914	0.862	16450	0.946	-0.81	0.86
NKAPL	-7.46	12	-1.09	0.138	1612	0.914	0.862	16444	0.946	-0.41	0.86
TIMM50	-7.46	12	-1.09	0.139	1613	0.914	0.861	16443	0.946	-0.755	0.86
CHEK1	-6.8	10	-1.09	0.139	1614	0.914	0.861	16442	0.946	-0.899	0.86
CHCHD5	-7.45	12	-1.09	0.139	1615	0.914	0.861	16441	0.946	-0.443	0.86
STRADB	-7.44	12	-1.08	0.139	1619	0.914	0.861	16437	0.945	-0.315	0.86
C19orf40	-7.47	12	-1.09	0.138	1607	0.914	0.862	16449	0.946	-0.429	0.86
TRIM56	-7.41	12	-1.08	0.14	1632	0.914	0.86	16424	0.945	-0.609	0.85
ATG3	-7.45	12	-1.09	0.139	1616	0.914	0.861	16440	0.946	-0.333	0.86
WAPAL	-7.44	12	-1.08	0.139	1620	0.914	0.861	16436	0.945	-0.566	0.86
KALRN	-7.41	12	-1.08	0.14	1633	0.914	0.86	16423	0.945	-0.175	0.85
MMP23B	-7.43	12	-1.08	0.14	1623	0.914	0.86	16433	0.945	-0.254	0.85
STYX	-7.43	12	-1.08	0.14	1622	0.914	0.86	16434	0.945	-0.496	0.85
WDR77	-7.1	11	-1.08	0.14	1634	0.914	0.86	16422	0.945	-0.71	0.85
XRCC1	-7.44	12	-1.08	0.139	1617	0.914	0.861	16439	0.945	-0.385	0.86
NARS2	-7.43	12	-1.08	0.14	1625	0.914	0.86	16431	0.945	-0.554	0.85
MRPL33	-7.41	12	-1.08	0.141	1635	0.914	0.859	16421	0.945	-0.387	0.85
NFATC2IP	-7.43	12	-1.08	0.14	1624	0.914	0.86	16432	0.945	-0.434	0.85
OR4A47	-7.42	12	-1.08	0.14	1629	0.914	0.86	16427	0.945	-0.33	0.85
GFER	-7.42	12	-1.08	0.14	1627	0.914	0.86	16429	0.945	-0.477	0.85
TMEM178A	-7.42	12	-1.08	0.14	1626	0.914	0.86	16430	0.945	-0.441	0.85
ARMC10	-7.42	12	-1.08	0.14	1628	0.914	0.86	16428	0.945	-0.498	0.85
FBXL14	-7.4	12	-1.08	0.141	1640	0.914	0.859	16416	0.945	-0.157	0.85
ARFGEF1	-7.41	12	-1.08	0.14	1631	0.914	0.86	16425	0.945	-0.275	0.85
NRL	-7.4	12	-1.08	0.141	1641	0.914	0.859	16415	0.945	-0.391	0.85
C1orf27	-7.42	12	-1.08	0.14	1630	0.914	0.86	16426	0.945	-0.638	0.85
RBM27	-7.41	12	-1.08	0.141	1637	0.914	0.859	16419	0.945	-0.266	0.85
LTBP2	-7.41	12	-1.08	0.141	1636	0.914	0.859	16420	0.945	-0.553	0.85
EDN2	-7.4	12	-1.08	0.141	1639	0.914	0.859	16417	0.945	-0.382	0.85
NAV2	-7.4	12	-1.08	0.141	1638	0.914	0.859	16418	0.945	-0.461	0.85
B3GNT6	-7.4	12	-1.07	0.141	1642	0.914	0.859	16414	0.945	-0.378	0.85
TFEB	-7.39	12	-1.07	0.141	1645	0.914	0.859	16411	0.945	-0.307	0.85
GUCA1A	-7.38	12	-1.07	0.142	1649	0.914	0.858	16407	0.944	-0.425	0.85
SCD	-7.39	12	-1.07	0.141	1644	0.914	0.859	16412	0.945	-0.286	0.85
FAM200A	-7.4	12	-1.07	0.141	1643	0.914	0.859	16413	0.945	-0.419	0.85
ELL	-7.38	12	-1.07	0.142	1648	0.914	0.858	16408	0.944	-2.037	0.85
MC3R	-7.39	12	-1.07	0.141	1646	0.914	0.859	16410	0.945	-0.287	0.85
PXN	-6.74	10	-1.07	0.142	1651	0.914	0.858	16405	0.944	-0.37	0.85
NAB2	-7.38	12	-1.07	0.142	1655	0.914	0.858	16401	0.944	-0.448	0.85
NCKAP1	-7.38	12	-1.07	0.142	1652	0.914	0.858	16404	0.944	-0.757	0.85
ZFAT	-7.07	11	-1.07	0.142	1647	0.914	0.858	16409	0.944	-0.314	0.85
TEX33	-7.38	12	-1.07	0.142	1656	0.914	0.858	16400	0.944	-0.591	0.85
SOD1	-7.38	12	-1.07	0.142	1650	0.914	0.858	16406	0.944	-0.49	0.85
LZIC	-7.38	12	-1.07	0.142	1657	0.914	0.858	16399	0.944	-0.28	0.85
PSD	-7.38	12	-1.07	0.142	1658	0.914	0.858	16398	0.944	-0.351	0.85
SLC39A1	-7.38	12	-1.07	0.142	1653	0.914	0.858	16403	0.944	-0.217	0.85
MDH2	-7.38	12	-1.07	0.142	1654	0.914	0.858	16402	0.944	-0.284	0.85
GATC	-7.36	12	-1.07	0.143	1666	0.914	0.857	16390	0.944	-0.337	0.84
PARP10	-7.37	12	-1.07	0.142	1661	0.914	0.858	16395	0.944	-0.334	0.85
FAM192A	-7.37	12	-1.07	0.142	1659	0.914	0.858	16397	0.944	-0.664	0.85
CEACAM1	-7.37	12	-1.07	0.143	1663	0.914	0.857	16393	0.944	-0.444	0.84
SERPINF2	-7.37	12	-1.07	0.142	1660	0.914	0.858	16396	0.944	-0.336	0.85
MIPEP	-7.36	12	-1.07	0.143	1665	0.914	0.857	16391	0.944	-0.133	0.84
MPG	-7.36	12	-1.07	0.143	1667	0.914	0.857	16389	0.944	-0.35	0.84
PHRF1	-7.36	12	-1.07	0.143	1669	0.914	0.857	16387	0.944	-0.626	0.84
KIAA1279	-7.36	12	-1.07	0.143	1664	0.914	0.857	16392	0.944	-0.21	0.84
TMEM98	-7.34	12	-1.06	0.144	1674	0.914	0.856	16382	0.944	-0.421	0.84
SRBD1	-7.05	11	-1.07	0.142	1662	0.914	0.858	16394	0.944	-0.956	0.85
MATK	-7.36	12	-1.07	0.143	1668	0.914	0.857	16388	0.944	-0.404	0.84
APAF1	-7.34	12	-1.06	0.144	1676	0.914	0.856	16380	0.944	-0.271	0.84
GTF3C3	-7.04	11	-1.07	0.143	1670	0.914	0.857	16386	0.944	-0.803	0.84
HS2ST1	-7.34	12	-1.06	0.144	1675	0.914	0.856	16381	0.944	-0.309	0.84
TTC27	-6.71	10	-1.07	0.143	1672	0.914	0.857	16384	0.944	-0.737	0.84
TMEM38A	-7.32	12	-1.06	0.144	1687	0.914	0.856	16369	0.944	-0.474	0.84
YIPF6	-7.32	12	-1.06	0.144	1686	0.914	0.856	16370	0.944	-0.529	0.84
FAM45A	-7.35	12	-1.07	0.143	1671	0.914	0.857	16385	0.944	-0.144	0.84
WDYHV1	-7.35	12	-1.06	0.143	1673	0.914	0.857	16383	0.944	-0.322	0.84
RCE1	-7.34	12	-1.06	0.144	1678	0.914	0.856	16378	0.944	-0.35	0.84
SSRP1	-7.34	12	-1.06	0.144	1677	0.914	0.856	16379	0.944	-0.723	0.84
C4orf19	-7.33	12	-1.06	0.144	1680	0.914	0.856	16376	0.944	-0.448	0.84
TMEM59L	-7.33	12	-1.06	0.144	1682	0.914	0.856	16374	0.944	-0.254	0.84
RHBDF2	-7.33	12	-1.06	0.144	1683	0.914	0.856	16373	0.944	-0.348	0.84
EPX	-7.33	12	-1.06	0.144	1681	0.914	0.856	16375	0.944	-0.304	0.84
DUSP13	-7.33	12	-1.06	0.144	1684	0.914	0.856	16372	0.944	-0.419	0.84
PI4KA	-7.29	12	-1.05	0.146	1706	0.914	0.854	16350	0.943	-0.297	0.84
WDR62	-7.33	12	-1.06	0.144	1685	0.914	0.856	16371	0.944	-0.294	0.84
AMDHD2	-7.34	12	-1.06	0.144	1679	0.914	0.856	16377	0.944	-0.379	0.84
TMEM116	-7.32	12	-1.06	0.145	1688	0.914	0.855	16368	0.944	-0.466	0.84
PDIK1L	-7.31	12	-1.06	0.145	1691	0.914	0.855	16365	0.943	-0.47	0.84
POLR2D	-6.34	9	-1.06	0.145	1689	0.914	0.855	16367	0.944	-0.619	0.84
RHBDL3	-7.31	12	-1.06	0.145	1693	0.914	0.855	16363	0.943	-0.442	0.84
MFSD4	-7.3	12	-1.06	0.146	1699	0.914	0.854	16357	0.943	-0.411	0.84
MRPS9	-7.31	12	-1.06	0.145	1694	0.914	0.855	16362	0.943	-0.515	0.84
ZMYM5	-7.31	12	-1.06	0.145	1692	0.914	0.855	16364	0.943	-0.219	0.84
AKT2	-7.3	12	-1.06	0.145	1696	0.914	0.855	16360	0.943	-0.192	0.84
C6orf222	-7.3	12	-1.06	0.145	1698	0.914	0.855	16358	0.943	-0.279	0.84
GPN2	-6.32	9	-1.06	0.145	1697	0.914	0.855	16359	0.943	-0.585	0.84
GPR110	-7.31	12	-1.06	0.145	1690	0.914	0.855	16366	0.943	-0.38	0.84
ATG16L1	-7.3	12	-1.06	0.146	1701	0.914	0.854	16355	0.943	-0.632	0.84
SNRNP48	-7.29	12	-1.05	0.146	1705	0.914	0.854	16351	0.943	-0.603	0.84
BIRC2	-7.3	12	-1.05	0.146	1704	0.914	0.854	16352	0.943	-0.359	0.84
DCAF4	-7.3	12	-1.05	0.146	1703	0.914	0.854	16353	0.943	-0.366	0.84
PAXBP1	-7.31	12	-1.06	0.145	1695	0.914	0.855	16361	0.943	-0.704	0.84
COTL1	-7.29	12	-1.05	0.146	1708	0.914	0.854	16348	0.943	-0.21	0.84
POLK	-7.3	12	-1.06	0.146	1700	0.914	0.854	16356	0.943	-0.495	0.84
CLPS	-7.29	12	-1.05	0.146	1707	0.914	0.854	16349	0.943	-0.225	0.84
RABGEF1	-7.28	12	-1.05	0.146	1709	0.914	0.854	16347	0.943	-0.362	0.84
ASPDH	-7.28	12	-1.05	0.146	1712	0.914	0.854	16344	0.943	-0.18	0.84
C9orf152	-7.28	12	-1.05	0.146	1711	0.914	0.854	16345	0.943	-0.207	0.84
AP1S2	-7.24	12	-1.04	0.148	1736	0.914	0.852	16320	0.942	-0.653	0.83
MED8	-6.64	10	-1.05	0.147	1714	0.914	0.853	16342	0.943	-0.878	0.83
IZUMO2	-7.28	12	-1.05	0.146	1710	0.914	0.854	16346	0.943	-0.366	0.84
KATNB1	-7.27	12	-1.05	0.147	1720	0.914	0.853	16336	0.943	-0.208	0.83
NOL3	-7.27	12	-1.05	0.147	1722	0.914	0.853	16334	0.943	-0.321	0.83
FAM47B	-7.25	12	-1.05	0.148	1731	0.914	0.852	16325	0.943	-0.287	0.83
BET1L	-7.27	12	-1.05	0.147	1719	0.914	0.853	16337	0.943	-0.252	0.83
IFI6	-7.26	12	-1.05	0.147	1724	0.914	0.853	16332	0.943	-0.527	0.83
ZBTB40	-7.27	12	-1.05	0.147	1718	0.914	0.853	16338	0.943	-0.283	0.83
SLC5A1	-7.26	12	-1.05	0.147	1729	0.914	0.853	16327	0.943	-0.175	0.83
SAFB	-7.25	12	-1.05	0.148	1734	0.914	0.852	16322	0.943	-0.361	0.83
HEATR5B	-7.26	12	-1.05	0.147	1728	0.914	0.853	16328	0.943	-0.208	0.83
SEC14L5	-7.27	12	-1.05	0.147	1717	0.914	0.853	16339	0.943	-0.288	0.83
TSFM	-7.28	12	-1.05	0.147	1713	0.914	0.853	16343	0.943	-0.486	0.83
NFKB2	-7.27	12	-1.05	0.147	1715	0.914	0.853	16341	0.943	-0.368	0.83
ARF5	-7.27	12	-1.05	0.147	1721	0.914	0.853	16335	0.943	-0.381	0.83
SAP130	-7.24	12	-1.04	0.148	1735	0.914	0.852	16321	0.942	-0.34	0.83
ANKRD12	-7.27	12	-1.05	0.147	1723	0.914	0.853	16333	0.943	-0.153	0.83
TNFRSF8	-7.3	12	-1.06	0.146	1702	0.914	0.854	16354	0.943	-0.169	0.84
FOLR2	-7.26	12	-1.05	0.147	1727	0.914	0.853	16329	0.943	-0.19	0.83
SRL	-6.28	9	-1.05	0.148	1733	0.914	0.852	16323	0.943	-0.264	0.83
PRKAR2B	-7.26	12	-1.05	0.147	1725	0.914	0.853	16331	0.943	-0.313	0.83
KLF16	-7.25	12	-1.05	0.148	1730	0.914	0.852	16326	0.943	-0.694	0.83
CENPN	-7.27	12	-1.05	0.147	1716	0.914	0.853	16340	0.943	-0.691	0.83
C20orf196	-7.24	12	-1.04	0.148	1737	0.914	0.852	16319	0.942	-0.186	0.83
LYRM4	-7.26	12	-1.05	0.147	1726	0.914	0.853	16330	0.943	-0.664	0.83
UBE2D3	-5.13	6	-1.05	0.148	1732	0.914	0.852	16324	0.943	-0.406	0.83
POLG2	-7.17	12	-1.03	0.151	1764	0.914	0.849	16292	0.941	-0.316	0.82
CD96	-7.23	12	-1.04	0.149	1739	0.914	0.851	16317	0.942	-0.382	0.83
RAD23A	-7.22	12	-1.04	0.149	1742	0.914	0.851	16314	0.942	-0.35	0.83
DUSP14	-7.23	12	-1.04	0.149	1741	0.914	0.851	16315	0.942	-0.31	0.83
ZNF511	-7.23	12	-1.04	0.149	1740	0.914	0.851	16316	0.942	-0.469	0.83
HYLS1	-7.21	12	-1.04	0.15	1750	0.914	0.85	16306	0.942	-0.361	0.82
PPP1R11	-7.21	12	-1.04	0.149	1746	0.914	0.851	16310	0.942	-0.319	0.83
BLK	-7.22	12	-1.04	0.149	1744	0.914	0.851	16312	0.942	-0.69	0.83
MOV10	-7.21	12	-1.04	0.15	1748	0.914	0.85	16308	0.942	-0.718	0.82
LRRC23	-7.22	12	-1.04	0.149	1745	0.914	0.851	16311	0.942	-0.288	0.83
KCNJ1	-7.19	12	-1.03	0.15	1755	0.914	0.85	16301	0.941	-0.447	0.82
GCM1	-7.21	12	-1.04	0.15	1747	0.914	0.85	16309	0.942	-0.372	0.82
KLHDC8A	-7.22	12	-1.04	0.149	1743	0.914	0.851	16313	0.942	-0.409	0.83
NUP43	-7.21	12	-1.04	0.15	1749	0.914	0.85	16307	0.942	-0.854	0.82
OR4D9	-7.18	12	-1.03	0.151	1762	0.914	0.849	16294	0.941	-0.306	0.82
HYI	-7.24	12	-1.04	0.148	1738	0.914	0.852	16318	0.942	-0.149	0.83
MUC6	-7.2	12	-1.04	0.15	1752	0.914	0.85	16304	0.941	-0.466	0.82
SAMD11	-7.2	12	-1.04	0.15	1751	0.914	0.85	16305	0.941	-0.484	0.82
WDR53	-7.2	12	-1.04	0.15	1753	0.914	0.85	16303	0.941	-0.181	0.82
TNFSF14	-7.2	12	-1.04	0.15	1754	0.914	0.85	16302	0.941	-0.199	0.82
MNAT1	-7.19	12	-1.03	0.151	1758	0.914	0.849	16298	0.941	-0.384	0.82
CLDN12	-7.19	12	-1.03	0.15	1756	0.914	0.85	16300	0.941	-0.232	0.82
PIGM	-7.19	12	-1.03	0.15	1757	0.914	0.85	16299	0.941	-0.287	0.82
PSMG4	-7.19	12	-1.03	0.151	1760	0.914	0.849	16296	0.941	-0.842	0.82
LHB	-7.19	12	-1.03	0.151	1761	0.914	0.849	16295	0.941	-0.559	0.82
GGPS1	-7.19	12	-1.03	0.151	1759	0.914	0.849	16297	0.941	-0.352	0.82
NLRP8	-7.18	12	-1.03	0.151	1763	0.914	0.849	16293	0.941	-0.226	0.82
POR	-7.17	12	-1.03	0.152	1765	0.914	0.848	16291	0.94	-0.512	0.82
CTC1	-7.15	12	-1.03	0.153	1774	0.914	0.847	16282	0.94	-0.629	0.82
MYC	-7.16	12	-1.03	0.152	1768	0.914	0.848	16288	0.94	-0.869	0.82
PRKAR2A	-6.85	11	-1.03	0.152	1769	0.914	0.848	16287	0.94	-0.39	0.82
CPAMD8	-7.16	12	-1.03	0.152	1766	0.914	0.848	16290	0.94	-0.272	0.82
IFITM5	-7.15	12	-1.03	0.152	1772	0.914	0.848	16284	0.94	-0.401	0.82
PID1	-7.15	12	-1.03	0.153	1773	0.914	0.847	16283	0.94	-0.379	0.82
MLLT6	-7.15	12	-1.03	0.152	1770	0.914	0.848	16286	0.94	-0.437	0.82
RAD18	-7.14	12	-1.02	0.153	1783	0.914	0.847	16273	0.94	-0.153	0.82
DOC2B	-7.16	12	-1.03	0.152	1767	0.914	0.848	16289	0.94	-0.362	0.82
C5orf60	-7.15	12	-1.03	0.153	1777	0.914	0.847	16279	0.94	-0.294	0.82
CEP85L	-7.14	12	-1.02	0.153	1779	0.914	0.847	16277	0.94	-0.338	0.82
RHOT1	-7.15	12	-1.03	0.153	1778	0.914	0.847	16278	0.94	-0.189	0.82
SLC2A1	-7.13	12	-1.02	0.154	1786	0.914	0.846	16270	0.939	-0.381	0.81
TTC3	-7.14	12	-1.02	0.153	1780	0.914	0.847	16276	0.94	-0.25	0.82
PLK1	-7.15	12	-1.03	0.153	1776	0.914	0.847	16280	0.94	-1.004	0.82
MB21D1	-7.14	12	-1.02	0.153	1781	0.914	0.847	16275	0.94	-0.237	0.82
KLHL4	-7.13	12	-1.02	0.153	1784	0.914	0.847	16272	0.94	-0.32	0.82
MANF	-7.15	12	-1.03	0.153	1775	0.914	0.847	16281	0.94	-0.436	0.82
ADSSL1	-7.14	12	-1.02	0.153	1782	0.914	0.847	16274	0.94	-0.38	0.82
NCOR2	-7.12	12	-1.02	0.154	1789	0.914	0.846	16267	0.939	-0.467	0.81
TLX1	-7.15	12	-1.03	0.152	1771	0.914	0.848	16285	0.94	-0.225	0.82
CLEC3B	-7.13	12	-1.02	0.154	1785	0.914	0.846	16271	0.939	-0.419	0.81
ATP5O	-7.12	12	-1.02	0.154	1787	0.914	0.846	16269	0.939	-0.353	0.81
ZDHHC19	-7.12	12	-1.02	0.154	1788	0.914	0.846	16268	0.939	-0.4	0.81
LGALS4	-7.12	12	-1.02	0.154	1791	0.914	0.846	16265	0.939	-0.243	0.81
DYRK2	-7.12	12	-1.02	0.154	1794	0.914	0.846	16262	0.939	-0.296	0.81
AKAP1	-7.09	12	-1.01	0.155	1810	0.914	0.845	16246	0.939	-0.257	0.81
PPP1R21	-7.12	12	-1.02	0.154	1790	0.914	0.846	16266	0.939	-0.417	0.81
MAT2A	-7.11	12	-1.02	0.154	1797	0.914	0.846	16259	0.939	-0.355	0.81
KLF14	-7.11	12	-1.02	0.154	1800	0.914	0.846	16256	0.939	-0.442	0.81
RAF1	-7.12	12	-1.02	0.154	1792	0.914	0.846	16264	0.939	-0.996	0.81
CRP	-7.12	12	-1.02	0.154	1793	0.914	0.846	16263	0.939	-0.201	0.81
MBOAT1	-7.11	12	-1.02	0.154	1798	0.914	0.846	16258	0.939	-0.239	0.81
PLEKHG4B	-7.11	12	-1.02	0.154	1795	0.914	0.846	16261	0.939	-0.551	0.81
PABPC4	-7.1	12	-1.02	0.155	1804	0.914	0.845	16252	0.939	-0.237	0.81
RYR1	-7.11	12	-1.02	0.154	1796	0.914	0.846	16260	0.939	-0.494	0.81
RPAP3	-7.11	12	-1.02	0.155	1803	0.914	0.845	16253	0.939	-0.384	0.81
MAST2	-7.11	12	-1.02	0.154	1802	0.914	0.846	16254	0.939	-0.185	0.81
MYO15A	-7.11	12	-1.02	0.154	1799	0.914	0.846	16257	0.939	-0.513	0.81
GUCD1	-7.09	12	-1.01	0.155	1812	0.914	0.845	16244	0.939	-0.289	0.81
RTKN2	-7.1	12	-1.02	0.155	1805	0.914	0.845	16251	0.939	-0.358	0.81
TMEM184A	-7.09	12	-1.01	0.155	1813	0.914	0.845	16243	0.939	-0.295	0.81
OR5A1	-7.1	12	-1.02	0.155	1807	0.914	0.845	16249	0.939	-0.332	0.81
TMEM30B	-7.1	12	-1.02	0.155	1808	0.914	0.845	16248	0.939	-0.363	0.81
NCF1	-7.11	12	-1.02	0.154	1801	0.914	0.846	16255	0.939	-0.381	0.81
CLUAP1	-7.1	12	-1.02	0.155	1809	0.914	0.845	16247	0.939	-0.148	0.81
ZAP70	-7.09	12	-1.01	0.155	1814	0.914	0.845	16242	0.939	-0.17	0.81
DACT2	-7.09	12	-1.01	0.155	1811	0.914	0.845	16245	0.939	-0.223	0.81
UBA2	-7.1	12	-1.02	0.155	1806	0.914	0.845	16250	0.939	-0.909	0.81
RFWD2	-7.06	12	-1.01	0.157	1828	0.914	0.843	16228	0.938	0.049	0.8
GNAT1	-7.09	12	-1.01	0.155	1815	0.914	0.845	16241	0.939	-0.4	0.81
VBP1	-7.06	12	-1.01	0.157	1830	0.914	0.843	16226	0.938	-0.983	0.8
TAC4	-7.08	12	-1.01	0.156	1819	0.914	0.844	16237	0.939	-0.303	0.81
STX12	-7.08	12	-1.01	0.156	1817	0.914	0.844	16239	0.939	-0.217	0.81
SP2	-7.06	12	-1.01	0.157	1827	0.914	0.843	16229	0.938	-0.175	0.8
MTOR	-7.08	12	-1.01	0.156	1818	0.914	0.844	16238	0.939	-1.447	0.81
FECH	-7.06	12	-1.01	0.157	1832	0.914	0.843	16224	0.938	-0.404	0.8
NBR1	-7.07	12	-1.01	0.156	1820	0.914	0.844	16236	0.939	-0.387	0.81
TMED8	-7.07	12	-1.01	0.156	1821	0.914	0.844	16235	0.939	-0.341	0.81
WARS2	-7.07	12	-1.01	0.156	1823	0.914	0.844	16233	0.938	-0.344	0.81
INF2	-7.07	12	-1.01	0.156	1825	0.914	0.844	16231	0.938	-0.282	0.81
AAK1	-7.05	12	-1.01	0.157	1841	0.914	0.843	16215	0.938	-0.298	0.8
CSPG4	-7.07	12	-1.01	0.156	1824	0.914	0.844	16232	0.938	-0.371	0.81
NOS1AP	-7.04	12	-1	0.158	1845	0.914	0.842	16211	0.938	-0.545	0.8
RNF10	-7.06	12	-1.01	0.157	1826	0.914	0.843	16230	0.938	-0.177	0.8
GAL3ST3	-7.06	12	-1.01	0.157	1831	0.914	0.843	16225	0.938	-0.259	0.8
SMAD9	-7.06	12	-1.01	0.157	1833	0.914	0.843	16223	0.938	-0.382	0.8
MAP2K2	-7.06	12	-1.01	0.157	1834	0.914	0.843	16222	0.938	-0.235	0.8
OR2T11	-7.05	12	-1.01	0.157	1836	0.914	0.843	16220	0.938	-0.687	0.8
RPA3	-6.44	10	-1.01	0.157	1835	0.914	0.843	16221	0.938	-0.2	0.8
RPUSD4	-7.08	12	-1.01	0.156	1816	0.914	0.844	16240	0.939	-0.283	0.81
PPP1R10	-6.77	11	-1.01	0.156	1822	0.914	0.844	16234	0.938	-0.363	0.81
C8G	-7.05	12	-1.01	0.157	1839	0.914	0.843	16217	0.938	-0.301	0.8
USP24	-7.06	12	-1.01	0.157	1829	0.914	0.843	16227	0.938	-0.327	0.8
ZSCAN22	-7.05	12	-1.01	0.157	1840	0.914	0.843	16216	0.938	-0.286	0.8
EFCAB5	-7.05	12	-1.01	0.157	1837	0.914	0.843	16219	0.938	-0.316	0.8
LRRC36	-7.05	12	-1.01	0.157	1838	0.914	0.843	16218	0.938	-0.207	0.8
MRPL34	-7.05	12	-1.01	0.157	1843	0.914	0.843	16213	0.938	-0.395	0.8
PVRL4	-7.04	12	-1	0.158	1844	0.914	0.842	16212	0.938	-0.118	0.8
MRAP2	-7.03	12	-1	0.158	1850	0.914	0.842	16206	0.938	-0.436	0.8
HNRNPD	-7.03	12	-1	0.158	1848	0.914	0.842	16208	0.938	-0.406	0.8
ATAD1	-7.05	12	-1.01	0.157	1842	0.914	0.843	16214	0.938	-0.455	0.8
SH2D6	-7.04	12	-1	0.158	1846	0.914	0.842	16210	0.938	-0.194	0.8
RAB18	-7.03	12	-1	0.158	1851	0.914	0.842	16205	0.938	-0.321	0.8
THAP7	-7.04	12	-1	0.158	1847	0.914	0.842	16209	0.938	-0.357	0.8
TBC1D31	-7.03	12	-1	0.158	1849	0.914	0.842	16207	0.938	-0.303	0.8
ETAA1	-7.03	12	-1	0.158	1852	0.914	0.842	16204	0.938	-0.149	0.8
UBD	-7.02	12	-1	0.158	1853	0.914	0.842	16203	0.938	-0.297	0.8
WNT9B	-7.01	12	-1	0.159	1860	0.914	0.841	16196	0.937	-0.385	0.8
FAM117A	-7.02	12	-1	0.159	1854	0.914	0.841	16202	0.938	-0.42	0.8
FZD9	-7.02	12	-1	0.159	1855	0.914	0.841	16201	0.937	-0.458	0.8
SLPI	-7.01	12	-1	0.159	1857	0.914	0.841	16199	0.937	-0.492	0.8
CEACAM21	-7.01	12	-1	0.159	1859	0.914	0.841	16197	0.937	-0.297	0.8
DHRS4	-7.01	12	-1	0.159	1858	0.914	0.841	16198	0.937	-0.246	0.8
MED1	-6.72	11	-1	0.159	1856	0.914	0.841	16200	0.937	-1.543	0.8
ZNF669	-6.99	12	-0.99	0.16	1868	0.914	0.84	16188	0.937	-0.154	0.8
GINS4	-7	12	-1	0.16	1862	0.914	0.84	16194	0.937	-0.687	0.8
NFE2L3	-6.99	12	-0.99	0.16	1869	0.914	0.84	16187	0.937	-0.598	0.8
SNRPD3	-6.37	10	-0.99	0.161	1876	0.914	0.839	16180	0.936	-0.683	0.79
KIF3C	-7	12	-1	0.16	1864	0.914	0.84	16192	0.937	-0.192	0.8
TMEM26	-6.99	12	-0.99	0.16	1865	0.914	0.84	16191	0.937	-0.474	0.8
CCDC155	-6.97	12	-0.99	0.161	1878	0.914	0.839	16178	0.936	-0.137	0.79
C8orf76	-7	12	-1	0.16	1863	0.914	0.84	16193	0.937	-0.236	0.8
PIGK	-7	12	-1	0.159	1861	0.914	0.841	16195	0.937	-0.364	0.8
GTF2B	-6.69	11	-0.99	0.16	1872	0.914	0.84	16184	0.937	-0.944	0.8
ASAP1	-6.99	12	-0.99	0.16	1867	0.914	0.84	16189	0.937	-0.438	0.8
CRYAB	-6.99	12	-0.99	0.16	1870	0.914	0.84	16186	0.937	-0.412	0.8
PMS1	-6.98	12	-0.99	0.161	1874	0.914	0.839	16182	0.936	-0.32	0.79
ITPKB	-6.98	12	-0.99	0.161	1873	0.914	0.839	16183	0.936	-0.204	0.79
GABRD	-6.98	12	-0.99	0.16	1871	0.914	0.84	16185	0.937	-0.131	0.8
MRPL15	-6.96	12	-0.99	0.161	1885	0.914	0.839	16171	0.936	-0.489	0.79
NCAPH	-6.97	12	-0.99	0.161	1879	0.914	0.839	16177	0.936	-0.67	0.79
NUDT15	-6.98	12	-0.99	0.161	1875	0.914	0.839	16181	0.936	-0.665	0.79
AKR1B10	-6.96	12	-0.99	0.162	1887	0.914	0.838	16169	0.936	-0.331	0.79
CNIH2	-6.94	12	-0.98	0.163	1899	0.914	0.837	16157	0.936	-0.408	0.79
COX6A2	-6.97	12	-0.99	0.161	1880	0.914	0.839	16176	0.936	-0.334	0.79
SYNE4	-6.97	12	-0.99	0.161	1877	0.914	0.839	16179	0.936	-0.335	0.79
CHRDL2	-6.97	12	-0.99	0.161	1881	0.914	0.839	16175	0.936	-0.186	0.79
OGDH	-6.97	12	-0.99	0.161	1882	0.914	0.839	16174	0.936	-0.295	0.79
HIC1	-6.96	12	-0.99	0.161	1884	0.914	0.839	16172	0.936	-0.529	0.79
USP5	-6.99	12	-0.99	0.16	1866	0.914	0.84	16190	0.937	-0.33	0.8
TMEM132D	-6.97	12	-0.99	0.161	1883	0.914	0.839	16173	0.936	-0.327	0.79
PLEKHD1	-6.96	12	-0.99	0.162	1886	0.914	0.838	16170	0.936	-0.278	0.79
UTP3	-6.95	12	-0.99	0.162	1890	0.914	0.838	16166	0.936	-0.392	0.79
PIK3CB	-6.95	12	-0.99	0.162	1891	0.914	0.838	16165	0.936	-0.469	0.79
POT1	-6.95	12	-0.99	0.162	1889	0.914	0.838	16167	0.936	-1.02	0.79
EMP2	-6.94	12	-0.98	0.163	1901	0.914	0.837	16155	0.936	-0.467	0.79
FOXL2	-6.95	12	-0.99	0.162	1892	0.914	0.838	16164	0.936	-0.337	0.79
ZC3H8	-6.95	12	-0.99	0.162	1888	0.914	0.838	16168	0.936	-0.788	0.79
ACSL4	-6.95	12	-0.99	0.162	1893	0.914	0.838	16163	0.936	-0.59	0.79
INSL3	-6.94	12	-0.98	0.163	1900	0.914	0.837	16156	0.936	-0.367	0.79
C2orf69	-6.94	12	-0.98	0.162	1898	0.914	0.838	16158	0.936	-0.311	0.79
MSH6	-6.95	12	-0.99	0.162	1894	0.914	0.838	16162	0.936	-0.357	0.79
SENP2	-6.94	12	-0.98	0.162	1896	0.914	0.838	16160	0.936	-0.427	0.79
TMEM204	-6.93	12	-0.98	0.163	1908	0.914	0.837	16148	0.936	-0.314	0.79
PCGF5	-6.94	12	-0.98	0.162	1897	0.914	0.838	16159	0.936	-0.448	0.79
GABPA	-6.94	12	-0.98	0.163	1902	0.914	0.837	16154	0.936	-0.236	0.79
RCAN2	-6.93	12	-0.98	0.163	1910	0.914	0.837	16146	0.936	-0.202	0.79
GOLGA8R	-4.91	6	-0.99	0.162	1895	0.914	0.838	16161	0.936	-0.274	0.79
MPP3	-6.92	12	-0.98	0.164	1914	0.914	0.836	16142	0.936	-0.332	0.79
GRIN3B	-6.93	12	-0.98	0.163	1906	0.914	0.837	16150	0.936	-0.541	0.79
RCN1	-6.94	12	-0.98	0.163	1903	0.914	0.837	16153	0.936	-0.343	0.79
LRRC73	-6.93	12	-0.98	0.163	1904	0.914	0.837	16152	0.936	-0.287	0.79
CLPSL2	-6.93	12	-0.98	0.163	1905	0.914	0.837	16151	0.936	-0.197	0.79
ZNF251	-6.93	12	-0.98	0.163	1907	0.914	0.837	16149	0.936	-0.215	0.79
LRP3	-6.92	12	-0.98	0.163	1911	0.914	0.837	16145	0.936	-0.302	0.79
MATN4	-6.92	12	-0.98	0.163	1913	0.914	0.837	16143	0.936	-0.417	0.79
IGFLR1	-6.93	12	-0.98	0.163	1909	0.914	0.837	16147	0.936	-0.23	0.79
LUM	-6.92	12	-0.98	0.163	1912	0.914	0.837	16144	0.936	-0.208	0.79
KREMEN1	-6.91	12	-0.98	0.164	1917	0.914	0.836	16139	0.935	-0.419	0.79
CEP120	-6.91	12	-0.98	0.164	1916	0.914	0.836	16140	0.935	-0.355	0.79
LRRIQ3	-6.9	12	-0.98	0.164	1919	0.914	0.836	16137	0.935	-0.311	0.79
NDUFB9	-6.88	12	-0.97	0.165	1936	0.914	0.835	16120	0.935	0.012	0.78
TMEM234	-6.9	12	-0.98	0.164	1918	0.914	0.836	16138	0.935	-0.397	0.79
SF3B3	-6.3	10	-0.98	0.164	1921	0.914	0.836	16135	0.935	-0.571	0.79
ATP8B3	-6.88	12	-0.97	0.165	1935	0.914	0.835	16121	0.935	-0.478	0.78
SPTSSA	-6.89	12	-0.97	0.165	1928	0.914	0.835	16128	0.935	-0.338	0.78
NEK4	-6.87	12	-0.97	0.166	1940	0.914	0.834	16116	0.934	-0.278	0.78
ZNF232	-6.9	12	-0.98	0.164	1920	0.914	0.836	16136	0.935	-0.346	0.79
HID1	-6.89	12	-0.97	0.165	1923	0.914	0.835	16133	0.935	-0.302	0.78
NRTN	-6.89	12	-0.97	0.165	1924	0.914	0.835	16132	0.935	-0.247	0.78
ISG15	-6.89	12	-0.97	0.165	1925	0.914	0.835	16131	0.935	-0.459	0.78
HOXC13	-6.59	11	-0.97	0.165	1930	0.914	0.835	16126	0.935	-0.433	0.78
RSBN1L	-6.89	12	-0.97	0.165	1931	0.914	0.835	16125	0.935	-0.331	0.78
POLDIP3	-6.89	12	-0.97	0.165	1929	0.914	0.835	16127	0.935	-0.216	0.78
MMP25	-6.87	12	-0.97	0.166	1945	0.914	0.834	16111	0.934	-0.311	0.78
B3GNT8	-6.89	12	-0.97	0.165	1932	0.914	0.835	16124	0.935	-0.41	0.78
PRPF3	-6.89	12	-0.97	0.165	1927	0.914	0.835	16129	0.935	-0.898	0.78
MRPL32	-6.88	12	-0.97	0.165	1934	0.914	0.835	16122	0.935	-0.405	0.78
JOSD2	-6.88	12	-0.97	0.166	1937	0.914	0.834	16119	0.935	-0.366	0.78
RIMS1	-6.87	12	-0.97	0.166	1939	0.914	0.834	16117	0.934	-0.366	0.78
PTCD3	-6.88	12	-0.97	0.166	1938	0.914	0.834	16118	0.935	-0.301	0.78
PRLR	-6.89	12	-0.97	0.165	1933	0.914	0.835	16123	0.935	-0.449	0.78
ZNF513	-6.87	12	-0.97	0.166	1944	0.914	0.834	16112	0.934	-0.479	0.78
TTC19	-6.87	12	-0.97	0.166	1942	0.914	0.834	16114	0.934	-0.049	0.78
FAM178B	-6.87	12	-0.97	0.166	1943	0.914	0.834	16113	0.934	-0.225	0.78
SELK	-6.89	12	-0.97	0.165	1926	0.914	0.835	16130	0.935	-0.363	0.78
MED13	-6.87	12	-0.97	0.166	1941	0.914	0.834	16115	0.934	-0.526	0.78
INHBB	-6.87	12	-0.97	0.166	1946	0.914	0.834	16110	0.934	-0.359	0.78
GSPT1	-6.85	12	-0.97	0.167	1952	0.914	0.833	16104	0.934	-0.566	0.78
GCNT4	-6.85	12	-0.97	0.167	1951	0.914	0.833	16105	0.934	-0.289	0.78
PDCL3	-6.86	12	-0.97	0.167	1947	0.914	0.833	16109	0.934	-0.338	0.78
CHRNE	-6.85	12	-0.97	0.167	1949	0.914	0.833	16107	0.934	-0.439	0.78
NSMCE4A	-6.84	12	-0.96	0.167	1955	0.914	0.833	16101	0.934	-0.387	0.78
PDE4A	-6.85	12	-0.97	0.167	1953	0.914	0.833	16103	0.934	-0.459	0.78
FBXO2	-6.83	12	-0.96	0.168	1960	0.914	0.832	16096	0.933	-0.274	0.77
SLC22A24	-6.82	12	-0.96	0.168	1962	0.914	0.832	16094	0.933	-0.152	0.77
PPM1B	-6.84	12	-0.96	0.167	1956	0.914	0.833	16100	0.934	-0.392	0.78
USP1	-6.82	12	-0.96	0.168	1964	0.914	0.832	16092	0.933	-0.238	0.77
BCCIP	-6.84	12	-0.96	0.167	1957	0.914	0.833	16099	0.934	-0.419	0.78
SF3A2	-6.21	10	-0.96	0.169	1976	0.914	0.831	16080	0.933	-0.161	0.77
BCKDK	-6.83	12	-0.96	0.168	1959	0.914	0.832	16097	0.933	-0.386	0.77
OIT3	-6.85	12	-0.97	0.167	1954	0.914	0.833	16102	0.934	-0.334	0.78
CMTM6	-6.82	12	-0.96	0.168	1965	0.914	0.832	16091	0.933	-0.159	0.77
ANKRD49	-6.83	12	-0.96	0.168	1961	0.914	0.832	16095	0.933	-0.403	0.77
ZBTB22	-6.82	12	-0.96	0.168	1963	0.914	0.832	16093	0.933	-0.311	0.77
AZGP1	-6.8	12	-0.96	0.17	1981	0.914	0.83	16075	0.933	-0.495	0.77
ARL11	-6.81	12	-0.96	0.169	1972	0.914	0.831	16084	0.933	-0.211	0.77
RASL10B	-6.81	12	-0.96	0.169	1966	0.914	0.831	16090	0.933	-0.283	0.77
CHD2	-6.8	12	-0.96	0.17	1979	0.914	0.83	16077	0.933	-0.232	0.77
CNTFR	-6.81	12	-0.96	0.169	1968	0.914	0.831	16088	0.933	-0.289	0.77
NT5DC4	-6.81	12	-0.96	0.169	1967	0.914	0.831	16089	0.933	-0.341	0.77
HHLA3	-6.81	12	-0.96	0.169	1969	0.914	0.831	16087	0.933	-0.261	0.77
OR4C3	-6.81	12	-0.96	0.169	1974	0.914	0.831	16082	0.933	-0.213	0.77
RNF123	-6.81	12	-0.96	0.169	1973	0.914	0.831	16083	0.933	-0.169	0.77
PEPD	-6.8	12	-0.96	0.17	1978	0.914	0.83	16078	0.933	-0.307	0.77
NPTX2	-6.8	12	-0.96	0.169	1977	0.914	0.831	16079	0.933	-0.353	0.77
LZTS1	-6.81	12	-0.96	0.169	1970	0.914	0.831	16086	0.933	-0.446	0.77
ZNF131	-6.81	12	-0.96	0.169	1971	0.914	0.831	16085	0.933	-0.387	0.77
BRD9	-6.85	12	-0.97	0.167	1950	0.914	0.833	16106	0.934	-0.425	0.78
TMEM52	-6.8	12	-0.96	0.17	1980	0.914	0.83	16076	0.933	-0.294	0.77
PIGV	-6.79	12	-0.95	0.17	1984	0.914	0.83	16072	0.932	-0.456	0.77
NYNRIN	-6.8	12	-0.96	0.169	1975	0.914	0.831	16081	0.933	-0.546	0.77
CD2BP2	-5.87	9	-0.95	0.17	1989	0.914	0.83	16067	0.932	-0.131	0.77
RETNLB	-6.79	12	-0.95	0.17	1982	0.914	0.83	16074	0.932	-0.242	0.77
POGLUT1	-6.78	12	-0.95	0.17	1987	0.914	0.83	16069	0.932	-0.317	0.77
CCL26	-6.79	12	-0.95	0.17	1985	0.914	0.83	16071	0.932	-0.295	0.77
SDC4	-6.84	12	-0.96	0.168	1958	0.914	0.832	16098	0.934	-0.345	0.77
PGAM5	-6.79	12	-0.95	0.17	1983	0.914	0.83	16073	0.932	-0.726	0.77
SYNDIG1	-6.78	12	-0.95	0.17	1986	0.914	0.83	16070	0.932	-0.194	0.77
NDUFV1	-6.78	12	-0.95	0.17	1988	0.914	0.83	16068	0.932	-0.22	0.77
ATL2	-6.77	12	-0.95	0.171	1998	0.914	0.829	16058	0.932	-0.415	0.77
PLA2G16	-6.77	12	-0.95	0.171	1996	0.914	0.829	16060	0.932	-0.239	0.77
SDR42E1	-6.77	12	-0.95	0.171	1995	0.914	0.829	16061	0.932	-0.421	0.77
TAX1BP3	-6.78	12	-0.95	0.171	1992	0.914	0.829	16064	0.932	-0.349	0.77
SLC44A5	-6.78	12	-0.95	0.171	1991	0.914	0.829	16065	0.932	-0.579	0.77
TYW1	-6.78	12	-0.95	0.171	1993	0.914	0.829	16063	0.932	-0.34	0.77
CENPBD1	-6.77	12	-0.95	0.171	1999	0.914	0.829	16057	0.932	-0.203	0.77
UBALD1	-6.77	12	-0.95	0.171	1997	0.914	0.829	16059	0.932	-0.432	0.77
RNF223	-6.75	12	-0.95	0.172	2010	0.914	0.828	16046	0.931	-0.396	0.76
HIST1H1B	-6.75	12	-0.95	0.172	2008	0.914	0.828	16048	0.932	-0.324	0.76
PLAA	-6.77	12	-0.95	0.171	1994	0.914	0.829	16062	0.932	-0.411	0.77
DLEC1	-6.76	12	-0.95	0.171	2000	0.914	0.829	16056	0.932	-0.183	0.77
POC5	-6.75	12	-0.95	0.172	2004	0.914	0.828	16052	0.932	-0.234	0.76
RLIM	-6.76	12	-0.95	0.171	2001	0.914	0.829	16055	0.932	-0.466	0.77
MAPRE1	-6.75	12	-0.95	0.172	2003	0.914	0.828	16053	0.932	-0.377	0.76
NUDC	-6.75	12	-0.95	0.172	2005	0.914	0.828	16051	0.932	-0.553	0.76
[truncated: 15,820 more rows]

## Sheet: Figure 7b
GENE	sumZ	numObs	normZ	pval_synth	rank_synth	fdr_synth	pval_supp	rank_supp	fdr_supp	Log2_FoldChange	-Log10(p)
MAD2L2	-52.93	12	-11.42	1.68e-30	1	3.03e-26	1	18055	1	-4.331	29.77
GTF2H5	-43.18	12	-9.2	1.87e-20	2	1.69e-16	1	18054	1	-2.853	19.73
ERCC8	-39.6	12	-8.38	2.7e-17	3	1.62e-13	1	18053	1	-2.664	16.57
ERCC5	-34.58	12	-7.23	2.34e-13	4	1.06e-09	1	18052	1	-2.158	12.63
NAE1	-31.72	12	-6.58	2.35e-11	5	8.5e-08	1	18051	1	-2.347	10.63
FBXW11	-31.39	12	-6.51	3.87e-11	6	1.16e-07	1	18050	1	-2.143	10.41
GTF2H4	-30.28	12	-6.25	2.03e-10	7	5.23e-07	1	18049	1	-2.375	9.69
RAB3GAP2	-28.88	12	-5.93	1.48e-09	8	3.34e-06	1	18048	1	-2.008	8.83
HMGXB3	-28.73	12	-5.9	1.84e-09	9	3.69e-06	1	18047	1	-1.592	8.74
DDX11	-27.55	12	-5.63	9.04e-09	11	1.42e-05	1	18045	1	-2.183	8.04
ERCC1	-27.56	12	-5.63	8.93e-09	10	1.42e-05	1	18046	1	-1.98	8.05
TUBB	-27.51	12	-5.62	9.47e-09	12	1.42e-05	1	18044	1	-2.223	8.02
SKA2	-27.43	12	-5.6	1.06e-08	13	1.47e-05	1	18043	1	-1.662	7.97
XPA	-26.94	12	-5.49	2.01e-08	14	2.6e-05	1	18042	1	-1.96	7.7
RAB18	-25.93	12	-5.26	7.23e-08	15	8.71e-05	1	18041	1	-2.076	7.14
UVSSA	-25.7	12	-5.21	9.57e-08	16	0.000106	1	18040	1	-1.47	7.02
ERCC2	-25.67	12	-5.2	9.96e-08	17	0.000106	1	18039	1	-2.109	7
RAD9A	-24.89	12	-5.02	2.53e-07	18	0.000254	1	18038	1	-1.619	6.6
VBP1	-24.14	12	-4.85	6.09e-07	19	0.000579	1	18037	1	-1.738	6.22
UBE2H	-23.25	12	-4.65	1.68e-06	20	0.00146	1	18036	1	-2.07	5.77
RAD1	-23.24	12	-4.65	1.69e-06	21	0.00146	1	18035	1	-1.951	5.77
RFWD3	-22.78	12	-4.54	2.79e-06	22	0.00229	1	18034	1	-1.044	5.55
REV3L	-22.5	12	-4.48	3.77e-06	23	0.00296	1	18033	1	-1.286	5.42
GTF2H1	-22.37	12	-4.45	4.35e-06	24	0.00327	1	18032	1	-2.071	5.36
MED26	-22.01	12	-4.37	6.29e-06	25	0.00455	1	18031	1	-2.957	5.2
ATP6V0C	-21.84	12	-4.33	7.58e-06	26	0.00526	1	18030	1	-2.341	5.12
ANKRD17	-21.66	12	-4.29	9.09e-06	27	0.00608	1	18029	1	-1.673	5.04
RRM1	-21.55	12	-4.26	1.02e-05	28	0.00651	1	18028	1	-2.712	4.99
SPTLC1	-21.52	12	-4.25	1.05e-05	29	0.00651	1	18027	1	-1.322	4.98
ERCC6	-21.44	12	-4.24	1.13e-05	30	0.00683	1	18026	1	-1.351	4.95
ELMO2	-21.26	12	-4.2	1.36e-05	31	0.00793	1	18025	1	-1.856	4.87
TBCA	-21.16	12	-4.17	1.51e-05	32	0.00848	1	18024	1	-2.485	4.82
GTF2A2	-21.13	12	-4.17	1.55e-05	33	0.00848	1	18023	1	-3.411	4.81
UBE2M	-20.98	12	-4.13	1.8e-05	34	0.00953	1	18022	1	-1.472	4.74
SKA3	-20.96	12	-4.13	1.85e-05	35	0.00953	1	18021	1	-1.737	4.73
RQCD1	-20.14	12	-3.94	4.09e-05	37	0.0199	1	18019	1	-1.706	4.39
WDHD1	-20.16	12	-3.94	3.99e-05	36	0.0199	1	18020	1	-1.873	4.4
PDCD5	-20.03	12	-3.91	4.53e-05	38	0.0215	1	18018	1	-1.626	4.34
ATR	-19.76	12	-3.85	5.81e-05	39	0.0269	1	18017	1	-2.024	4.24
ARPC4	-19.7	12	-3.84	6.16e-05	40	0.0278	1	18016	1	-1.715	4.21
RNGTT	-19.47	12	-3.79	7.64e-05	41	0.0337	1	18015	1	-2.694	4.12
YPEL5	-19.39	12	-3.77	8.22e-05	42	0.0353	1	18014	1	-1.94	4.09
ANKRD49	-19.26	12	-3.74	9.24e-05	43	0.0388	1	18013	1	-1.297	4.03
GTF2H3	-19.18	12	-3.72	9.92e-05	44	0.04	1	18012	1	-2.43	4
WDR26	-16.61	9	-3.72	9.97e-05	45	0.04	1	18011	1	-1.292	4
PFDN5	-19.07	12	-3.7	0.000109	46	0.043	1	18010	1	-1.472	3.96
USP7	-18.99	12	-3.68	0.000118	47	0.0454	1	18009	1	-0.962	3.93
PPIL2	-18.92	12	-3.66	0.000126	48	0.0474	1	18008	1	-1.7	3.9
RNF4	-18.76	12	-3.62	0.000145	49	0.0533	1	18007	1	-1.463	3.84
TOE1	-18.74	12	-3.62	0.000148	50	0.0533	1	18006	1	-1.176	3.83
MMS19	-18.71	12	-3.61	0.000151	51	0.0533	1	18005	1	-0.949	3.82
ATP8B1	-18.66	12	-3.6	0.000158	52	0.0547	1	18004	1	-1.101	3.8
SNUPN	-18.62	12	-3.59	0.000164	53	0.0559	1	18003	1	-1.534	3.79
DOLK	-18.53	12	-3.57	0.000177	55	0.0582	1	18001	1	-1.371	3.75
WRAP53	-18.53	12	-3.57	0.000177	54	0.0582	1	18002	1	-1.118	3.75
HUS1	-18.34	12	-3.53	0.000209	56	0.0669	1	18000	1	-1.394	3.68
HMGCS1	-18.25	12	-3.51	0.000225	58	0.0699	1	17998	1	-1.778	3.65
BTAF1	-18.33	12	-3.53	0.000211	57	0.0669	1	17999	1	-1.601	3.68
CCT5	-17.32	11	-3.47	0.000257	59	0.0788	1	17997	1	-2.341	3.59
AP1G1	-17.98	12	-3.45	0.000285	62	0.0829	1	17994	1	-1.326	3.55
NUP205	-18.01	12	-3.45	0.000276	60	0.0829	1	17996	1	-2.008	3.56
TCP1	-15.58	9	-3.45	0.000281	61	0.0829	1	17995	1	-2.263	3.55
ITGB5	-17.76	12	-3.4	0.000341	64	0.0955	1	17992	1	-2.997	3.47
NDUFAB1	-17.75	12	-3.39	0.000344	65	0.0955	1	17991	1	-1.838	3.46
AQR	-17.78	12	-3.4	0.000335	63	0.0955	1	17993	1	-1.535	3.47
HNRNPU	-17.65	12	-3.37	0.000372	66	0.102	1	17990	1	-1.407	3.43
PAN2	-17.61	12	-3.36	0.000386	67	0.104	1	17989	1	-1.156	3.41
SKA1	-17.49	12	-3.33	0.000428	68	0.114	1	17988	1	-1.588	3.37
TMEM30A	-17.38	12	-3.31	0.000467	69	0.122	1	17987	1	-1.158	3.33
DDB1	-17.33	12	-3.3	0.000486	70	0.125	1	17986	1	-2.001	3.31
NUDCD3	-17.29	12	-3.29	0.000503	71	0.128	0.999	17985	1	-1.401	3.3
COPA	-17.25	12	-3.28	0.000518	72	0.129	0.999	17984	1	-2.152	3.29
DBF4	-17.24	12	-3.28	0.000523	73	0.129	0.999	17983	1	-1.67	3.28
DCTN5	-17.2	12	-3.27	0.000542	74	0.132	0.999	17982	1	-1.213	3.27
BCLAF1	-17.11	12	-3.25	0.00058	76	0.138	0.999	17980	1	-1.673	3.24
VPS52	-17.18	12	-3.26	0.000548	75	0.132	0.999	17981	1	-1.134	3.26
SZRD1	-17.01	12	-3.23	0.000628	77	0.147	0.999	17979	1	-1.083	3.2
IPO13	-16.97	12	-3.22	0.000648	78	0.15	0.999	17978	1	-1.962	3.19
PKMYT1	-16.92	12	-3.2	0.000677	79	0.155	0.999	17977	1	-0.567	3.17
MRPL45	-16.84	12	-3.19	0.000717	80	0.162	0.999	17976	1	-1.143	3.14
TOMM20	-16.81	12	-3.18	0.000734	82	0.162	0.999	17974	1	-1.18	3.13
CHST4	-16.83	12	-3.18	0.000727	81	0.162	0.999	17975	1	-1.545	3.14
RAD51	-16.8	12	-3.18	0.000744	83	0.162	0.999	17973	1	-1.528	3.13
UXT	-16.71	12	-3.16	0.000794	85	0.169	0.999	17971	1	-1.458	3.1
TRA2B	-16.73	12	-3.16	0.000783	84	0.168	0.999	17972	1	-1.148	3.11
NAA10	-16.58	12	-3.13	0.000878	87	0.181	0.999	17969	1	-1.722	3.06
RAD17	-16.59	12	-3.13	0.000874	86	0.181	0.999	17970	1	-1.335	3.06
CCNB1	-16.56	12	-3.12	0.000894	89	0.181	0.999	17967	1	-0.893	3.05
BOD1L1	-16.58	12	-3.13	0.000881	88	0.181	0.999	17968	1	-1.942	3.06
HMX1	-16.46	12	-3.1	0.000966	91	0.191	0.999	17965	1	-0.878	3.02
MARK2	-16.5	12	-3.11	0.000938	90	0.188	0.999	17966	1	-1.204	3.03
PTK2	-16.44	12	-3.1	0.000982	92	0.191	0.999	17964	1	-1.305	3.01
PPP1R8	-16.44	12	-3.09	0.000985	93	0.191	0.999	17963	1	-1.571	3.01
ARCN1	-16.35	12	-3.08	0.00105	95	0.199	0.999	17961	1	-2.259	2.98
TCEB3	-16.36	12	-3.08	0.00105	94	0.199	0.999	17962	1	-0.873	2.98
IGLON5	-16.26	12	-3.05	0.00113	96	0.212	0.999	17960	1	-1.184	2.95
HSPA9	-16.22	12	-3.05	0.00116	97	0.216	0.999	17959	1	-2.16	2.94
SEC63	-16.15	12	-3.03	0.00122	98	0.225	0.999	17958	1	-1.323	2.91
RAD51C	-16.09	12	-3.02	0.00128	99	0.234	0.999	17957	1	-1.321	2.89
GPX8	-16.03	12	-3	0.00134	100	0.24	0.999	17956	1	-1.037	2.87
FANCF	-16.02	12	-3	0.00135	102	0.24	0.999	17954	1	-0.899	2.87
HAUS3	-16.02	12	-3	0.00135	101	0.24	0.999	17955	1	-0.757	2.87
ARPC3	-15.99	12	-2.99	0.00138	103	0.242	0.999	17953	1	-1.288	2.86
RBM4	-15.88	12	-2.97	0.0015	104	0.261	0.998	17952	1	-1.002	2.82
ELL	-15.8	12	-2.95	0.00159	106	0.271	0.998	17950	1	-1.786	2.8
C6orf136	-15.83	12	-2.96	0.00156	105	0.268	0.998	17951	1	-0.991	2.81
UBA3	-15.73	12	-2.93	0.00168	107	0.283	0.998	17949	1	-0.855	2.77
PDCL3	-15.71	12	-2.93	0.0017	108	0.285	0.998	17948	1	-0.995	2.77
DHX15	-15.68	12	-2.92	0.00174	109	0.288	0.998	17947	1	-2.184	2.76
EED	-15.61	12	-2.91	0.00183	110	0.301	0.998	17946	1	-0.932	2.74
NODAL	-15.57	12	-2.9	0.00188	111	0.305	0.998	17945	1	-1.174	2.73
GNB1	-15.56	12	-2.89	0.0019	112	0.306	0.998	17944	1	-1.205	2.72
PDE7A	-14.16	10	-2.89	0.00196	114	0.31	0.998	17942	1	-1.236	2.71
VMA21	-15.46	12	-2.87	0.00205	115	0.32	0.998	17941	1	-1.075	2.69
GABPB1	-15.52	12	-2.89	0.00195	113	0.31	0.998	17943	1	-0.784	2.71
CUL4B	-15.45	12	-2.87	0.00206	116	0.32	0.998	17940	1	-1.047	2.69
KIAA0196	-15.42	12	-2.86	0.0021	117	0.324	0.998	17939	1	-0.879	2.68
PLK1	-15.35	12	-2.85	0.0022	120	0.331	0.998	17936	1	-2.13	2.66
POLR2B	-15.4	12	-2.86	0.00213	118	0.326	0.998	17938	1	-2.33	2.67
C17orf85	-15.35	12	-2.85	0.0022	119	0.331	0.998	17937	1	-0.722	2.66
PEX1	-15.34	12	-2.84	0.00223	121	0.331	0.998	17935	1	-0.935	2.65
SLC7A6	-15.31	12	-2.84	0.00227	123	0.331	0.998	17933	1	-0.853	2.64
RPS5	-15.29	12	-2.83	0.00231	125	0.333	0.998	17931	1	-1.701	2.64
WDR70	-15.31	12	-2.84	0.00228	124	0.331	0.998	17932	1	-1.706	2.64
HAUS1	-13.26	9	-2.84	0.00226	122	0.331	0.998	17934	1	-0.753	2.65
RAD51D	-15.27	12	-2.83	0.00234	126	0.335	0.998	17930	1	-1.611	2.63
GGPS1	-15.25	12	-2.82	0.00238	127	0.338	0.998	17929	1	-1.428	2.62
MCM9	-15.2	12	-2.81	0.00245	129	0.343	0.998	17927	1	-0.683	2.61
SRRM1	-15.2	12	-2.81	0.00245	128	0.343	0.998	17928	1	-1.506	2.61
PTBP1	-15.18	12	-2.81	0.00249	130	0.345	0.998	17926	1	-0.996	2.6
SF3B1	-15.16	12	-2.8	0.00253	131	0.348	0.997	17925	1	-2.031	2.6
CCT3	-15.11	12	-2.79	0.00262	132	0.358	0.997	17924	1	-1.974	2.58
PUM1	-15.07	12	-2.78	0.00269	133	0.362	0.997	17923	1	-0.872	2.57
ZBTB2	-15.06	12	-2.78	0.0027	134	0.362	0.997	17922	1	-1.132	2.57
TXNL4B	-15.06	12	-2.78	0.00271	135	0.362	0.997	17921	1	-1.901	2.57
STAG2	-15.04	12	-2.78	0.00274	136	0.364	0.997	17920	1	-0.968	2.56
NUP214	-15	12	-2.77	0.00282	137	0.371	0.997	17919	1	-1.798	2.55
RPL38	-14.9	12	-2.74	0.00303	138	0.395	0.997	17918	1	-1.091	2.52
SNRPD2	-14.9	12	-2.74	0.00304	139	0.395	0.997	17917	1	-1.791	2.52
PSMB3	-13.55	10	-2.73	0.00316	141	0.402	0.997	17915	1	-1.565	2.5
IER3IP1	-14.81	12	-2.72	0.00322	143	0.406	0.997	17913	1	-0.704	2.49
ATP6V1C1	-14.86	12	-2.74	0.00312	140	0.402	0.997	17916	1	-1.031	2.51
GEMIN5	-14.84	12	-2.73	0.00316	142	0.402	0.997	17914	1	-2.267	2.5
NUFIP2	-14.79	12	-2.72	0.00328	144	0.411	0.997	17912	1	-1.373	2.48
TIPARP	-14.73	12	-2.71	0.0034	145	0.424	0.997	17911	1	-1.265	2.47
THG1L	-14.71	12	-2.7	0.00345	146	0.427	0.997	17910	1	-1.178	2.46
CDK12	-14.66	12	-2.69	0.00357	150	0.43	0.996	17906	1	-0.725	2.45
RFC5	-14.65	12	-2.69	0.00361	151	0.432	0.996	17905	1	-1.341	2.44
C1orf52	-14.69	12	-2.7	0.0035	147	0.428	0.996	17909	1	-1.189	2.46
TACC3	-14.67	12	-2.69	0.00355	149	0.43	0.996	17907	1	-1.108	2.45
SACS	-14.69	12	-2.7	0.00351	148	0.428	0.996	17908	1	-1.022	2.45
UBE2N	-10.32	6	-2.67	0.00375	155	0.437	0.996	17901	1	-1.034	2.43
RIC8A	-14.62	12	-2.68	0.00369	152	0.437	0.996	17904	1	-1.063	2.43
OAZ3	-14.61	12	-2.68	0.00371	153	0.437	0.996	17903	1	-1.091	2.43
ACTR10	-14.59	12	-2.67	0.00374	154	0.437	0.996	17902	1	-1.514	2.43
ACTR2	-14.57	12	-2.67	0.0038	156	0.44	0.996	17900	1	-2.995	2.42
ATP6V1B2	-14.54	12	-2.66	0.00388	157	0.447	0.996	17899	1	-1.569	2.41
CDC42	-12.56	9	-2.65	0.00399	158	0.454	0.996	17898	1	-2.709	2.4
DDX6	-14.5	12	-2.65	0.004	159	0.454	0.996	17897	1	-1.691	2.4
CKAP5	-14.49	12	-2.65	0.00402	160	0.454	0.996	17896	1	-1.426	2.4
IER2	-14.46	12	-2.65	0.00408	162	0.455	0.996	17894	1	-1.139	2.39
N6AMT1	-14.47	12	-2.65	0.00407	161	0.455	0.996	17895	1	-1.084	2.39
LTB	-14.4	12	-2.63	0.00428	164	0.471	0.996	17892	1	-1.212	2.37
PYROXD1	-14.37	12	-2.62	0.00434	166	0.471	0.996	17890	1	-1.356	2.36
GNA12	-14.46	12	-2.64	0.00411	163	0.455	0.996	17893	1	-0.778	2.39
LIMS1	-14.38	12	-2.63	0.00431	165	0.471	0.996	17891	1	-1.216	2.37
PHF1	-14.36	12	-2.62	0.00439	168	0.472	0.996	17888	1	-1.096	2.36
PTPMT1	-14.37	12	-2.62	0.00435	167	0.471	0.996	17889	1	-1.172	2.36
SHFM1	-14.31	12	-2.61	0.00452	169	0.483	0.995	17887	1	-0.875	2.34
SLC9A2	-14.28	12	-2.6	0.00461	171	0.485	0.995	17885	1	-1.13	2.34
SF3B4	-14.28	12	-2.6	0.00462	172	0.485	0.995	17884	1	-1.236	2.34
MCM5	-14.24	12	-2.59	0.00476	175	0.486	0.995	17881	1	-1.742	2.32
CDK13	-14.29	12	-2.61	0.00459	170	0.485	0.995	17886	1	-0.927	2.34
ACVR2A	-14.25	12	-2.6	0.00471	174	0.486	0.995	17882	1	-1.044	2.33
HNRNPUL1	-14.23	12	-2.59	0.00479	177	0.486	0.995	17879	1	-0.715	2.32
TUBGCP6	-14.27	12	-2.6	0.00466	173	0.486	0.995	17883	1	-0.737	2.33
ILF3	-14.23	12	-2.59	0.00479	176	0.486	0.995	17880	1	-1.912	2.32
RPS14	-14.22	12	-2.59	0.00482	179	0.486	0.995	17877	1	-1.538	2.32
INCA1	-14.22	12	-2.59	0.0048	178	0.486	0.995	17878	1	-0.741	2.32
RMND5A	-14.21	12	-2.59	0.00485	180	0.486	0.995	17876	1	-0.936	2.31
DNM1L	-14.16	12	-2.57	0.00502	182	0.498	0.995	17874	1	-0.997	2.3
MITF	-14.18	12	-2.58	0.00495	181	0.493	0.995	17875	1	-1.006	2.31
SSU72	-14.13	12	-2.57	0.00511	184	0.501	0.995	17872	1	-2.227	2.29
SNRNP40	-14.13	12	-2.57	0.0051	183	0.501	0.995	17873	1	-0.836	2.29
SARS	-14.11	12	-2.56	0.00517	185	0.505	0.995	17871	1	-1.612	2.29
NCSTN	-14.09	12	-2.56	0.00523	186	0.505	0.995	17870	1	-1.281	2.28
SRSF11	-14.09	12	-2.56	0.00524	187	0.505	0.995	17869	1	-1.527	2.28
UBE2D2	-14.07	12	-2.56	0.00531	189	0.505	0.995	17867	1	-0.957	2.27
MAFA	-14.07	12	-2.56	0.00529	188	0.505	0.995	17868	1	-1.1	2.28
UBE2I	-12.84	10	-2.55	0.00532	190	0.505	0.995	17866	1	-1.334	2.27
ALG1	-14.05	12	-2.55	0.00539	191	0.508	0.995	17865	1	-2.193	2.27
DDX5	-14.03	12	-2.55	0.00546	193	0.508	0.995	17863	1	-1.142	2.26
SNRPD1	-14.01	12	-2.54	0.00551	194	0.508	0.994	17862	1	-1.303	2.26
C7orf55-LUC7L2	-14	12	-2.54	0.00556	195	0.508	0.994	17861	1	-0.786	2.25
SRSF7	-14	12	-2.54	0.00557	197	0.508	0.994	17859	1	-1.198	2.25
PHF5A	-12.1	9	-2.53	0.00565	199	0.508	0.994	17857	1	-2.162	2.25
WBP11	-14	12	-2.54	0.00557	196	0.508	0.994	17860	1	-1.664	2.25
FARS2	-13.96	12	-2.53	0.00569	201	0.508	0.994	17855	1	-0.908	2.24
AP1M1	-14.04	12	-2.55	0.00541	192	0.508	0.995	17864	1	-0.741	2.27
PDS5A	-13.99	12	-2.54	0.00559	198	0.508	0.994	17858	1	-0.935	2.25
CCT4	-13.97	12	-2.53	0.00567	200	0.508	0.994	17856	1	-1.674	2.25
AMFR	-13.95	12	-2.53	0.00574	204	0.508	0.994	17852	1	-0.845	2.24
PRMT1	-13.95	12	-2.53	0.00573	203	0.508	0.994	17853	1	-1.739	2.24
NUP50	-13.94	12	-2.53	0.00577	205	0.508	0.994	17851	1	-1.128	2.24
DMAP1	-13.96	12	-2.53	0.00572	202	0.508	0.994	17854	1	-1.048	2.24
UBR4	-13.9	12	-2.52	0.00595	207	0.519	0.994	17849	1	-1.263	2.23
FERMT2	-13.92	12	-2.52	0.00584	206	0.512	0.994	17850	1	-1.423	2.23
HMGCR	-13.85	12	-2.5	0.00612	208	0.532	0.994	17848	1	-1.491	2.21
LRRC36	-13.83	12	-2.5	0.00621	209	0.535	0.994	17847	1	-0.76	2.21
TIPRL	-13.79	12	-2.49	0.00637	213	0.54	0.994	17843	1	-0.532	2.2
EIF3I	-13.82	12	-2.5	0.00626	210	0.535	0.994	17846	1	-1.689	2.2
EMC1	-13.81	12	-2.5	0.00628	212	0.535	0.994	17844	1	-0.776	2.2
ARL2	-13.81	12	-2.5	0.00627	211	0.535	0.994	17845	1	-1.473	2.2
ATP6V1A	-12.56	10	-2.48	0.0065	214	0.547	0.993	17842	1	-1.869	2.19
MAGEC3	-13.76	12	-2.48	0.00651	215	0.547	0.993	17841	1	-0.857	2.19
RTCB	-13.71	12	-2.47	0.00671	217	0.558	0.993	17839	1	-1.585	2.17
DAPK3	-13.69	12	-2.47	0.00677	219	0.558	0.993	17837	1	-1.104	2.17
IPO8	-13.72	12	-2.48	0.00666	216	0.557	0.993	17840	1	-0.78	2.18
VRK1	-13.7	12	-2.47	0.00675	218	0.558	0.993	17838	1	-0.593	2.17
VPS51	-13.67	12	-2.46	0.00686	220	0.56	0.993	17836	1	-1.001	2.16
CYC1	-13.66	12	-2.46	0.00692	222	0.56	0.993	17834	1	-0.748	2.16
MTOR	-13.67	12	-2.46	0.00686	221	0.56	0.993	17835	1	-2.053	2.16
PFDN1	-13.65	12	-2.46	0.00695	224	0.56	0.993	17832	1	-1.021	2.16
RAB3GAP1	-13.61	12	-2.45	0.00716	230	0.56	0.993	17826	1	-0.571	2.15
MGAT1	-13.66	12	-2.46	0.00693	223	0.56	0.993	17833	1	-0.615	2.16
SYNGAP1	-13.62	12	-2.45	0.00711	228	0.56	0.993	17828	1	-0.886	2.15
FAM96B	-13.63	12	-2.45	0.00707	227	0.56	0.993	17829	1	-1.376	2.15
STK19	-13.61	12	-2.45	0.00716	231	0.56	0.993	17825	1	-0.946	2.15
OR4S1	-13.63	12	-2.46	0.00703	226	0.56	0.993	17830	1	-0.755	2.15
HUWE1	-13.61	12	-2.45	0.00714	229	0.56	0.993	17827	1	-1.269	2.15
C21orf59	-13.57	12	-2.44	0.00732	234	0.563	0.993	17822	1	-1.676	2.14
BCL2L1	-13.57	12	-2.44	0.00731	233	0.563	0.993	17823	1	-1.338	2.14
DOHH	-13.56	12	-2.44	0.00736	236	0.563	0.993	17820	1	-1.151	2.13
IFT122	-13.56	12	-2.44	0.00736	235	0.563	0.993	17821	1	-0.851	2.13
LUC7L3	-13.53	12	-2.43	0.00749	237	0.571	0.993	17819	1	-1.639	2.13
STT3B	-13.58	12	-2.44	0.00727	232	0.563	0.993	17824	1	-0.603	2.14
PPIE	-13.49	12	-2.42	0.00771	239	0.583	0.992	17817	1	-1.198	2.11
BLACE	-13.47	12	-2.42	0.00781	241	0.585	0.992	17815	1	-0.85	2.11
GLYATL3	-13.48	12	-2.42	0.00774	240	0.583	0.992	17816	1	-1.117	2.11
BARD1	-13.5	12	-2.42	0.00767	238	0.582	0.992	17818	1	-1.53	2.12
COPB1	-13.42	12	-2.41	0.00806	243	0.597	0.992	17813	1	-1.86	2.09
WBSCR16	-13.42	12	-2.41	0.00803	242	0.597	0.992	17814	1	-0.633	2.1
IK	-13.39	12	-2.4	0.0082	245	0.604	0.992	17811	1	-0.711	2.09
CENPN	-13.42	12	-2.41	0.00807	244	0.597	0.992	17812	1	-0.926	2.09
ZNF556	-13.38	12	-2.4	0.00826	247	0.604	0.992	17809	1	-0.572	2.08
CHAF1A	-13.38	12	-2.4	0.00825	246	0.604	0.992	17810	1	-1.352	2.08
TSSC1	-13.34	12	-2.39	0.00848	249	0.61	0.992	17807	1	-0.511	2.07
WDR92	-13.33	12	-2.39	0.0085	250	0.61	0.992	17806	1	-1.814	2.07
RAD51B	-13.33	12	-2.39	0.00852	252	0.61	0.991	17804	1	-0.958	2.07
SBDS	-13.31	12	-2.38	0.00863	254	0.614	0.991	17802	1	-1.403	2.06
DYNLRB1	-13.34	12	-2.39	0.00846	248	0.61	0.992	17808	1	-1.553	2.07
SYS1	-13.33	12	-2.39	0.00852	251	0.61	0.991	17805	1	-1.893	2.07
ATP10A	-13.29	12	-2.38	0.00873	256	0.616	0.991	17800	1	-1.078	2.06
TNPO3	-13.29	12	-2.38	0.00871	255	0.616	0.991	17801	1	-1.307	2.06
DUSP14	-13.28	12	-2.37	0.0088	257	0.618	0.991	17799	1	-1.053	2.06
WWTR1	-13.31	12	-2.38	0.00863	253	0.614	0.991	17803	1	-1.051	2.06
C12orf71	-13.19	12	-2.35	0.00929	261	0.636	0.991	17795	1	-0.648	2.03
SLC38A2	-13.21	12	-2.36	0.00918	259	0.636	0.991	17797	1	-0.94	2.04
PPP2CA	-13.21	12	-2.36	0.00914	258	0.636	0.991	17798	1	-0.688	2.04
HYAL2	-13.18	12	-2.35	0.00931	262	0.636	0.991	17794	1	-0.729	2.03
SRSF6	-13.15	12	-2.35	0.0095	266	0.636	0.99	17790	1	-0.96	2.02
DNMT3A	-13.15	12	-2.34	0.00953	267	0.636	0.99	17789	1	-0.84	2.02
BRCA1	-13.19	12	-2.35	0.00928	260	0.636	0.991	17796	1	-0.583	2.03
PSENEN	-13.16	12	-2.35	0.00945	264	0.636	0.991	17792	1	-0.72	2.02
SLC34A1	-13.15	12	-2.35	0.00949	265	0.636	0.991	17791	1	-0.894	2.02
TXLNA	-13.16	12	-2.35	0.00945	263	0.636	0.991	17793	1	-0.819	2.02
NUTF2	-13.14	12	-2.34	0.00958	268	0.636	0.99	17788	1	-1.895	2.02
HNRNPA2B1	-13.13	12	-2.34	0.00964	272	0.636	0.99	17784	1	-1.114	2.02
MPL	-13.14	12	-2.34	0.00958	269	0.636	0.99	17787	1	-0.615	2.02
STUB1	-13.11	12	-2.34	0.00975	276	0.636	0.99	17780	1	-0.787	2.01
RAVER2	-13.11	12	-2.34	0.00972	274	0.636	0.99	17782	1	-1.044	2.01
UBE2Q1	-13.13	12	-2.34	0.00961	271	0.636	0.99	17785	1	-0.817	2.02
ETF1	-13.13	12	-2.34	0.00964	273	0.636	0.99	17783	1	-1.696	2.02
NEDD8	-11.35	9	-2.34	0.00976	277	0.636	0.99	17779	1	-1	2.01
SART3	-13.11	12	-2.34	0.00975	275	0.636	0.99	17781	1	-2.069	2.01
GPN2	-13.14	12	-2.34	0.00959	270	0.636	0.99	17786	1	-3.043	2.02
CNOT2	-13.05	12	-2.32	0.0101	282	0.645	0.99	17774	1	-1.05	2
ZC3H8	-13.07	12	-2.33	0.00999	279	0.645	0.99	17777	1	-0.723	2
CCNF	-11.33	9	-2.33	0.00989	278	0.643	0.99	17778	1	-0.689	2
TRIM8	-13.03	12	-2.32	0.0102	283	0.651	0.99	17773	1	-0.6	1.99
TADA1	-13.06	12	-2.32	0.0101	280	0.645	0.99	17776	1	-1.37	2
TP53BP2	-13.06	12	-2.32	0.0101	281	0.645	0.99	17775	1	-0.974	2
POLR2E	-13.01	12	-2.31	0.0104	286	0.654	0.99	17770	1	-1.298	1.98
WDR25	-13.03	12	-2.32	0.0102	284	0.651	0.99	17772	1	-0.85	1.99
ALG8	-13.02	12	-2.31	0.0103	285	0.654	0.99	17771	1	-0.702	1.99
ATP8B2	-12.98	12	-2.31	0.0105	288	0.657	0.989	17768	1	-0.811	1.98
AIP	-13	12	-2.31	0.0104	287	0.655	0.99	17769	1	-0.757	1.98
SNX24	-12.96	12	-2.3	0.0107	292	0.657	0.989	17764	1	-0.732	1.97
NADSYN1	-12.97	12	-2.3	0.0106	289	0.657	0.989	17767	1	-0.797	1.97
CCT7	-11.82	10	-2.3	0.0107	294	0.657	0.989	17762	1	-1.488	1.97
ANAPC11	-12.96	12	-2.3	0.0107	291	0.657	0.989	17765	1	-1.758	1.97
YARS	-12.96	12	-2.3	0.0106	290	0.657	0.989	17766	1	-2.107	1.97
NLRP9	-12.95	12	-2.3	0.0107	293	0.657	0.989	17763	1	-1.03	1.97
GFOD2	-12.95	12	-2.3	0.0107	295	0.657	0.989	17761	1	-1.108	1.97
PCDHB3	-12.92	12	-2.29	0.011	296	0.669	0.989	17760	1	-0.76	1.96
SEC61A1	-12.87	12	-2.28	0.0113	298	0.681	0.989	17758	1	-1.514	1.95
PI4KB	-12.87	12	-2.28	0.0113	299	0.681	0.989	17757	1	-0.933	1.95
CLCC1	-12.9	12	-2.29	0.011	297	0.671	0.989	17759	1	-0.999	1.96
THAP11	-12.83	12	-2.27	0.0115	301	0.692	0.988	17755	1	-0.498	1.94
MCFD2	-12.83	12	-2.27	0.0115	300	0.692	0.988	17756	1	-0.864	1.94
TTC1	-12.82	12	-2.27	0.0116	302	0.693	0.988	17754	1	-1.256	1.94
PFDN6	-12.76	12	-2.26	0.012	303	0.716	0.988	17753	1	-0.995	1.92
ZC3H7B	-12.72	12	-2.25	0.0123	306	0.72	0.988	17750	1	-0.571	1.91
GCM2	-12.73	12	-2.25	0.0123	305	0.72	0.988	17751	1	-0.779	1.91
GID8	-12.74	12	-2.25	0.0122	304	0.72	0.988	17752	1	-1.658	1.91
BIRC6	-12.72	12	-2.25	0.0123	309	0.72	0.988	17747	1	-0.936	1.91
TMEM69	-12.72	12	-2.25	0.0123	307	0.72	0.988	17749	1	-1.083	1.91
GFI1	-12.72	12	-2.25	0.0123	308	0.72	0.988	17748	1	-0.926	1.91
ZNF136	-12.68	12	-2.24	0.0126	310	0.731	0.987	17746	1	-0.926	1.9
CDC40	-12.68	12	-2.24	0.0126	311	0.731	0.987	17745	1	-1.123	1.9
NARG2	-12.67	12	-2.24	0.0127	312	0.731	0.987	17744	1	-1.437	1.9
HTATSF1	-12.67	12	-2.24	0.0127	313	0.731	0.987	17743	1	-1.311	1.9
ERCC4	-12.67	12	-2.23	0.0127	314	0.731	0.987	17742	1	-0.523	1.9
TTC26	-12.65	12	-2.23	0.0128	316	0.731	0.987	17740	1	-0.969	1.89
ITGB8	-12.65	12	-2.23	0.0128	317	0.731	0.987	17739	1	-0.587	1.89
DAXX	-12.66	12	-2.23	0.0128	315	0.731	0.987	17741	1	-0.622	1.89
MKNK2	-12.64	12	-2.23	0.0129	318	0.733	0.987	17738	1	-0.647	1.89
ELF4	-12.62	12	-2.22	0.013	320	0.736	0.987	17736	1	-1.013	1.89
CSNK1A1	-12.63	12	-2.23	0.013	319	0.736	0.987	17737	1	-0.532	1.89
THOC3	-12.57	12	-2.21	0.0134	321	0.751	0.987	17735	1	-1.494	1.87
GPR142	-12.56	12	-2.21	0.0135	324	0.751	0.986	17732	1	-1.179	1.87
RING1	-12.55	12	-2.21	0.0136	326	0.751	0.986	17730	1	-0.509	1.87
GNB1L	-10.88	9	-2.21	0.0135	322	0.751	0.986	17734	1	-0.927	1.87
SMG5	-12.55	12	-2.21	0.0136	325	0.751	0.986	17731	1	-0.637	1.87
ANKDD1B	-12.52	12	-2.2	0.0139	331	0.755	0.986	17725	1	-0.868	1.86
DAZAP1	-12.55	12	-2.21	0.0136	327	0.751	0.986	17729	1	-1.089	1.87
COPB2	-12.53	12	-2.2	0.0138	329	0.755	0.986	17727	1	-2.342	1.86
PTPN1	-12.49	12	-2.2	0.0141	336	0.755	0.986	17720	1	-0.874	1.85
GLMN	-12.5	12	-2.2	0.014	334	0.755	0.986	17722	1	-1.023	1.85
BSCL2	-12.52	12	-2.2	0.0138	330	0.755	0.986	17726	1	-0.883	1.86
SUPT4H1	-12.5	12	-2.2	0.014	335	0.755	0.986	17721	1	-1.355	1.85
CREB3L2	-12.56	12	-2.21	0.0135	323	0.751	0.986	17733	1	-0.652	1.87
DPH5	-12.53	12	-2.2	0.0138	328	0.755	0.986	17728	1	-0.95	1.86
PGLS	-10.83	9	-2.2	0.014	332	0.755	0.986	17724	1	-0.265	1.85
CLCA4	-12.5	12	-2.2	0.014	333	0.755	0.986	17723	1	-0.775	1.85
AKR7A2	-12.47	12	-2.19	0.0142	339	0.755	0.986	17717	1	-1.022	1.85
WDR7	-12.47	12	-2.19	0.0142	340	0.755	0.986	17716	1	-0.686	1.85
CLTC	-12.47	12	-2.19	0.0143	341	0.755	0.986	17715	1	-0.906	1.84
TRAPPC3	-12.48	12	-2.19	0.0142	338	0.755	0.986	17718	1	-1.266	1.85
RPS16	-12.45	12	-2.19	0.0144	343	0.759	0.986	17713	1	-1.145	1.84
PRPF38B	-12.45	12	-2.19	0.0144	342	0.759	0.986	17714	1	-1.488	1.84
MED7	-11.95	11	-2.19	0.0142	337	0.755	0.986	17719	1	-1.11	1.85
RTEL1	-12.42	12	-2.18	0.0146	347	0.762	0.985	17709	1	-1.043	1.84
DDX19A	-12.43	12	-2.18	0.0146	346	0.762	0.985	17710	1	-0.921	1.84
SLC6A12	-12.43	12	-2.18	0.0146	344	0.762	0.985	17712	1	-0.68	1.84
SRCAP	-12.4	12	-2.17	0.0149	350	0.766	0.985	17706	1	-1.211	1.83
PIK3C3	-12.41	12	-2.18	0.0148	349	0.765	0.985	17707	1	-1.123	1.83
TRMT1	-12.43	12	-2.18	0.0146	345	0.762	0.985	17711	1	-0.652	1.84
NACC1	-12.39	12	-2.17	0.0149	351	0.768	0.985	17705	1	-0.596	1.83
DDX20	-11.85	11	-2.17	0.0151	352	0.774	0.985	17704	1	-1.229	1.82
SP100	-12.41	12	-2.18	0.0148	348	0.765	0.985	17708	1	-0.901	1.83
OPN5	-12.36	12	-2.16	0.0152	354	0.775	0.985	17702	1	-0.875	1.82
CARD17	-12.33	12	-2.16	0.0154	356	0.775	0.985	17700	1	-0.355	1.81
SHBG	-12.35	12	-2.16	0.0153	355	0.775	0.985	17701	1	-1.115	1.82
NUP160	-12.33	12	-2.16	0.0155	357	0.775	0.985	17699	1	-1.471	1.81
NFAT5	-12.37	12	-2.17	0.0151	353	0.774	0.985	17703	1	-0.774	1.82
ZC3H11A	-12.33	12	-2.16	0.0155	360	0.775	0.985	17696	1	-0.845	1.81
PNPLA8	-10.68	9	-2.16	0.0155	359	0.775	0.985	17697	1	-0.58	1.81
ABCB7	-12.33	12	-2.16	0.0155	358	0.775	0.985	17698	1	-1.099	1.81
EIF2B2	-12.33	12	-2.16	0.0155	361	0.775	0.984	17695	1	-1.65	1.81
ATP6V1E1	-12.29	12	-2.15	0.0158	362	0.787	0.984	17694	1	-0.831	1.8
OR2A5	-12.27	12	-2.15	0.016	363	0.793	0.984	17693	1	-0.754	1.8
NUBP1	-11.2	10	-2.14	0.016	364	0.793	0.984	17692	1	-0.55	1.8
EXD1	-12.24	12	-2.14	0.0163	365	0.805	0.984	17691	1	-0.663	1.79
TMTC1	-12.24	12	-2.14	0.0163	366	0.805	0.984	17690	1	-0.99	1.79
GAL3ST2	-12.23	12	-2.14	0.0164	367	0.805	0.984	17689	1	-0.649	1.79
TTC19	-12.2	12	-2.13	0.0166	369	0.814	0.983	17687	1	-0.587	1.78
FAM53A	-12.18	12	-2.12	0.0168	372	0.816	0.983	17684	1	-0.467	1.77
UBAP2L	-12.22	12	-2.13	0.0164	368	0.806	0.984	17688	1	-0.738	1.79
LUZP1	-12.2	12	-2.13	0.0167	370	0.815	0.983	17686	1	-0.809	1.78
C11orf53	-12.17	12	-2.12	0.0169	373	0.818	0.983	17683	1	-0.734	1.77
ZNHIT1	-12.19	12	-2.13	0.0168	371	0.816	0.983	17685	1	-0.574	1.77
KIF3A	-12.13	12	-2.11	0.0173	380	0.822	0.983	17676	1	-0.359	1.76
PDCL	-12.14	12	-2.11	0.0172	377	0.822	0.983	17679	1	-1.163	1.76
DBX1	-12.16	12	-2.12	0.017	374	0.821	0.983	17682	1	-0.823	1.77
ASNA1	-12.14	12	-2.11	0.0173	379	0.822	0.983	17677	1	-0.969	1.76
NRF1	-12.14	12	-2.12	0.0172	376	0.822	0.983	17680	1	-1.172	1.76
RC3H1	-12.12	12	-2.11	0.0175	382	0.822	0.983	17674	1	-0.974	1.76
PCGF3	-12.14	12	-2.11	0.0172	378	0.822	0.983	17678	1	-0.813	1.76
ARMCX2	-12.11	12	-2.11	0.0175	384	0.822	0.982	17672	1	-0.646	1.76
FCN3	-12.11	12	-2.11	0.0175	385	0.822	0.982	17671	1	-0.963	1.76
TSEN54	-12.15	12	-2.12	0.0171	375	0.822	0.983	17681	1	-1.687	1.77
UBIAD1	-12.09	12	-2.1	0.0177	387	0.826	0.982	17669	1	-0.645	1.75
SAFB	-12.12	12	-2.11	0.0174	381	0.822	0.983	17675	1	-1.275	1.76
ZDHHC24	-12.08	12	-2.1	0.0178	388	0.828	0.982	17668	1	-0.633	1.75
SCGB1D4	-12.06	12	-2.1	0.018	391	0.83	0.982	17665	1	-0.709	1.74
NBAS	-12.1	12	-2.1	0.0177	386	0.826	0.982	17670	1	-1.002	1.75
EXOSC10	-12.07	12	-2.1	0.0179	389	0.829	0.982	17667	1	-0.934	1.75
ICAM4	-12.06	12	-2.1	0.018	392	0.83	0.982	17664	1	-1.15	1.74
ATP2A2	-12.12	12	-2.11	0.0175	383	0.822	0.983	17673	1	-1.659	1.76
TCERG1	-12.07	12	-2.1	0.0179	390	0.829	0.982	17666	1	-0.363	1.75
DDX42	-12.03	12	-2.09	0.0184	393	0.844	0.982	17663	1	-0.265	1.74
TBATA	-12	12	-2.08	0.0186	394	0.854	0.981	17662	1	-0.957	1.73
ERGIC2	-11.98	12	-2.08	0.0188	396	0.858	0.981	17660	1	-0.469	1.73
MED1	-11.99	12	-2.08	0.0188	395	0.858	0.981	17661	1	-1.038	1.73
GPR85	-11.97	12	-2.08	0.019	397	0.863	0.981	17659	1	-0.688	1.72
MPZL2	-11.92	12	-2.06	0.0195	400	0.881	0.98	17656	1	-0.492	1.71
MEMO1	-11.94	12	-2.07	0.0193	398	0.876	0.981	17658	1	-0.937	1.71
ZNF665	-11.92	12	-2.07	0.0194	399	0.88	0.981	17657	1	-0.936	1.71
IRGM	-11.9	12	-2.06	0.0197	402	0.884	0.98	17654	1	-0.491	1.71
PDZD11	-11.9	12	-2.06	0.0196	401	0.884	0.98	17655	1	-1.162	1.71
RNF223	-11.88	12	-2.06	0.0199	404	0.888	0.98	17652	1	-0.779	1.7
RECQL5	-11.87	12	-2.05	0.02	406	0.888	0.98	17650	1	-0.669	1.7
SPOCK1	-11.87	12	-2.05	0.02	407	0.888	0.98	17649	1	-0.611	1.7
CNOT3	-11.87	12	-2.05	0.02	405	0.888	0.98	17651	1	-0.994	1.7
POLA2	-11.89	12	-2.06	0.0198	403	0.886	0.98	17653	1	-1.699	1.7
POLD3	-11.86	12	-2.05	0.0201	408	0.888	0.98	17648	1	-2.544	1.7
SLA2	-11.86	12	-2.05	0.0201	409	0.888	0.98	17647	1	-0.824	1.7
C4BPA	-11.84	12	-2.05	0.0203	411	0.888	0.98	17645	1	-0.665	1.69
ATP6AP2	-11.85	12	-2.05	0.0202	410	0.888	0.98	17646	1	-0.725	1.69
EXOC2	-11.84	12	-2.05	0.0203	412	0.888	0.98	17644	1	-1.347	1.69
GSTM3	-11.84	12	-2.05	0.0204	413	0.888	0.98	17643	1	-0.816	1.69
CENPW	-11.83	12	-2.04	0.0205	416	0.888	0.98	17640	1	-0.778	1.69
CDC73	-11.83	12	-2.04	0.0204	414	0.888	0.98	17642	1	-1.672	1.69
NCKAP1	-11.83	12	-2.04	0.0204	415	0.888	0.98	17641	1	-0.94	1.69
NCAN	-11.81	12	-2.04	0.0207	419	0.889	0.979	17637	1	-1.298	1.68
LRRC30	-11.79	12	-2.04	0.0209	423	0.889	0.979	17633	1	-0.747	1.68
ACER1	-11.83	12	-2.04	0.0205	417	0.888	0.979	17639	1	-0.432	1.69
CNOT6	-11.8	12	-2.04	0.0209	422	0.889	0.979	17634	1	-0.6	1.68
SLC39A13	-11.79	12	-2.03	0.021	426	0.889	0.979	17630	1	-1.26	1.68
DSCR3	-11.79	12	-2.03	0.021	425	0.889	0.979	17631	1	-0.575	1.68
OR13H1	-11.81	12	-2.04	0.0206	418	0.889	0.979	17638	1	-0.67	1.69
ARFRP1	-11.8	12	-2.04	0.0208	420	0.889	0.979	17636	1	-0.929	1.68
INHBA	-11.75	12	-2.03	0.0214	429	0.899	0.979	17627	1	-0.832	1.67
RIOK3	-11.8	12	-2.04	0.0208	421	0.889	0.979	17635	1	-0.938	1.68
COX19	-11.79	12	-2.03	0.0209	424	0.889	0.979	17632	1	-0.689	1.68
NUP93	-11.77	12	-2.03	0.0211	427	0.892	0.979	17629	1	-1.357	1.68
FBRSL1	-11.74	12	-2.02	0.0215	431	0.899	0.979	17625	1	-0.575	1.67
LTA	-11.73	12	-2.02	0.0216	433	0.899	0.978	17623	1	-1.375	1.67
PCNA	-11.77	12	-2.03	0.0212	428	0.895	0.979	17628	1	-2.129	1.67
BTBD2	-11.74	12	-2.02	0.0215	432	0.899	0.978	17624	1	-0.658	1.67
TRPC6	-11.72	12	-2.02	0.0218	437	0.899	0.978	17619	1	-0.589	1.66
WDR65	-11.73	12	-2.02	0.0217	435	0.899	0.978	17621	1	-0.561	1.66
ILK	-10.15	9	-2.02	0.0217	436	0.899	0.978	17620	1	-0.402	1.66
DCTN4	-11.75	12	-2.03	0.0214	430	0.899	0.979	17626	1	-1.183	1.67
HGS	-11.7	12	-2.02	0.0219	441	0.899	0.978	17615	1	-1.246	1.66
SMU1	-11.71	12	-2.02	0.0219	438	0.899	0.978	17618	1	-2.903	1.66
CCDC132	-11.7	12	-2.02	0.0219	440	0.899	0.978	17616	1	-0.788	1.66
OR5A1	-11.69	12	-2.01	0.022	442	0.901	0.978	17614	1	-0.629	1.66
SV2C	-11.73	12	-2.02	0.0217	434	0.899	0.978	17622	1	-0.647	1.66
MPI	-11.66	12	-2	0.0225	445	0.912	0.978	17611	1	-0.641	1.65
LY6K	-11.67	12	-2.01	0.0224	444	0.91	0.978	17612	1	-0.867	1.65
HSCB	-11.71	12	-2.02	0.0219	439	0.899	0.978	17617	1	-1.687	1.66
YTHDF2	-11.65	12	-2	0.0225	446	0.912	0.977	17610	1	-0.686	1.65
NAALADL1	-11.65	12	-2	0.0226	447	0.912	0.977	17609	1	-0.625	1.65
SERINC5	-11.67	12	-2.01	0.0223	443	0.909	0.978	17613	1	-0.515	1.65
CENPM	-11.64	12	-2	0.0227	448	0.914	0.977	17608	1	-1.311	1.64
GOT2	-11.63	12	-2	0.0228	450	0.916	0.977	17606	1	-0.816	1.64
ZNF221	-11.63	12	-2	0.0228	449	0.916	0.977	17607	1	-0.663	1.64
REV1	-11.63	12	-2	0.0229	451	0.916	0.977	17605	1	-0.826	1.64
CCR7	-11.61	12	-1.99	0.0231	454	0.917	0.977	17602	1	-0.638	1.64
OR1I1	-11.62	12	-2	0.023	452	0.917	0.977	17604	1	-0.522	1.64
C15orf61	-11.6	12	-1.99	0.0231	455	0.918	0.977	17601	1	-0.628	1.64
CFTR	-11.57	12	-1.99	0.0236	458	0.929	0.976	17598	1	-0.782	1.63
NBN	-11.61	12	-1.99	0.0231	453	0.917	0.977	17603	1	-0.975	1.64
ACTR6	-11.56	12	-1.98	0.0237	459	0.931	0.976	17597	1	-0.885	1.63
WDR83	-11.59	12	-1.99	0.0233	457	0.921	0.977	17599	1	-1	1.63
ZNF574	-11.59	12	-1.99	0.0233	456	0.921	0.977	17600	1	-0.796	1.63
SLC7A6OS	-11.56	12	-1.98	0.0237	460	0.932	0.976	17596	1	-2.227	1.63
POLR2F	-11.55	12	-1.98	0.0239	461	0.936	0.976	17595	1	-2.772	1.62
UVRAG	-11.54	12	-1.98	0.024	462	0.938	0.976	17594	1	-0.59	1.62
ACTR3	-11.53	12	-1.98	0.0241	463	0.938	0.976	17593	1	-1.776	1.62
DIO1	-11.53	12	-1.98	0.0241	464	0.938	0.976	17592	1	-0.977	1.62
SLC4A8	-11.5	12	-1.97	0.0245	467	0.947	0.975	17589	1	-1.095	1.61
CCT8	-11.5	12	-1.97	0.0245	468	0.947	0.975	17588	1	-1.67	1.61
SLIT1	-11.52	12	-1.97	0.0242	465	0.94	0.976	17591	1	-0.782	1.62
OR2V1	-11.51	12	-1.97	0.0244	466	0.946	0.976	17590	1	-0.767	1.61
BUB1B	-11.48	12	-1.96	0.0248	471	0.948	0.975	17585	1	-0.605	1.61
C2CD4C	-11.46	12	-1.96	0.0251	474	0.955	0.975	17582	1	-0.435	1.6
DNTTIP1	-11.47	12	-1.96	0.0249	473	0.951	0.975	17583	1	-0.598	1.6
PHTF1	-11.44	12	-1.96	0.0252	476	0.956	0.975	17580	1	-0.588	1.6
TIMM13	-11.48	12	-1.97	0.0247	469	0.948	0.975	17587	1	-1.067	1.61
DDX43	-11.48	12	-1.96	0.0247	470	0.948	0.975	17586	1	-1.143	1.61
LURAP1	-11.44	12	-1.95	0.0253	478	0.957	0.975	17578	1	-0.876	1.6
TAGLN	-11.42	12	-1.95	0.0256	481	0.96	0.974	17575	1	-0.973	1.59
C17orf96	-11.48	12	-1.96	0.0248	472	0.948	0.975	17584	1	-0.783	1.61
CCNK	-11.42	12	-1.95	0.0255	480	0.96	0.974	17576	1	-1.569	1.59
BCL6B	-11.43	12	-1.95	0.0254	479	0.957	0.975	17577	1	-0.586	1.6
CPSF2	-11.45	12	-1.96	0.0252	475	0.956	0.975	17581	1	-1.258	1.6
ORAOV1	-11.44	12	-1.96	0.0253	477	0.956	0.975	17579	1	-0.868	1.6
NPSR1	-11.41	12	-1.95	0.0257	482	0.961	0.974	17574	1	-0.71	1.59
ARHGEF12	-11.4	12	-1.95	0.0258	483	0.963	0.974	17573	1	-0.853	1.59
FAM73B	-11.4	12	-1.95	0.0259	484	0.965	0.974	17572	1	-0.932	1.59
CYP3A43	-10.88	11	-1.94	0.0263	488	0.967	0.974	17568	1	-0.892	1.58
ERCC3	-11.37	12	-1.94	0.0263	487	0.967	0.974	17569	1	-1.006	1.58
AIFM3	-11.36	12	-1.94	0.0263	489	0.967	0.974	17567	1	-0.526	1.58
SATL1	-11.39	12	-1.94	0.0259	485	0.966	0.974	17571	1	-0.631	1.59
NUS1	-11.35	12	-1.93	0.0265	492	0.967	0.973	17564	1	-1.541	1.58
EFTUD1	-11.35	12	-1.94	0.0265	490	0.967	0.974	17566	1	-0.949	1.58
MED4	-11.34	12	-1.93	0.0266	495	0.967	0.973	17561	1	-1.734	1.58
OR5M11	-11.35	12	-1.93	0.0266	494	0.967	0.973	17562	1	-0.836	1.58
CCDC24	-11.34	12	-1.93	0.0266	497	0.967	0.973	17559	1	-0.855	1.58
IFI30	-11.35	12	-1.93	0.0265	493	0.967	0.973	17563	1	-0.889	1.58
CIC	-11.33	12	-1.93	0.0268	500	0.967	0.973	17556	1	-0.457	1.57
TMEM185A	-11.38	12	-1.94	0.0261	486	0.967	0.974	17570	1	-0.607	1.58
ADAT2	-9.81	9	-1.93	0.0269	501	0.967	0.973	17555	1	-0.578	1.57
HNRNPL	-11.31	12	-1.93	0.027	504	0.969	0.973	17552	1	-1.166	1.57
MRPS27	-11.34	12	-1.93	0.0267	498	0.967	0.973	17558	1	-0.626	1.57
SLC15A1	-11.34	12	-1.93	0.0266	496	0.967	0.973	17560	1	-0.606	1.58
PCDHB8	-9.83	9	-1.93	0.0265	491	0.967	0.973	17565	1	-0.471	1.58
STYXL1	-11.33	12	-1.93	0.0268	499	0.967	0.973	17557	1	-0.952	1.57
UBE2J2	-11.32	12	-1.93	0.027	503	0.969	0.973	17553	1	-0.735	1.57
PFDN4	-11.32	12	-1.93	0.0269	502	0.967	0.973	17554	1	-0.588	1.57
MSRA	-11.3	12	-1.92	0.0273	507	0.972	0.973	17549	1	-0.498	1.56
ATP1A3	-11.3	12	-1.92	0.0273	506	0.972	0.973	17550	1	-0.72	1.56
C6orf62	-11.29	12	-1.92	0.0274	509	0.972	0.973	17547	1	-0.628	1.56
MMP15	-11.29	12	-1.92	0.0274	508	0.972	0.973	17548	1	-0.844	1.56
UBA1	-11.27	12	-1.92	0.0277	512	0.977	0.972	17544	1	-1.095	1.56
PPP4C	-11.3	12	-1.92	0.0272	505	0.972	0.973	17551	1	-0.703	1.57
CSE1L	-11.26	12	-1.91	0.0278	513	0.977	0.972	17543	1	-1.555	1.56
JPH4	-11.25	12	-1.91	0.028	515	0.977	0.972	17541	1	-0.751	1.55
PYCR1	-11.22	12	-1.91	0.0283	519	0.977	0.972	17537	1	-0.747	1.55
MED20	-11.28	12	-1.92	0.0276	510	0.976	0.972	17546	1	-0.979	1.56
VPS28	-11.27	12	-1.92	0.0277	511	0.977	0.972	17545	1	-1.253	1.56
TMEM43	-11.23	12	-1.91	0.0283	517	0.977	0.972	17539	1	-0.888	1.55
ADD1	-11.2	12	-1.9	0.0286	524	0.977	0.971	17532	1	-0.8	1.54
AHCY	-11.24	12	-1.91	0.0281	516	0.977	0.972	17540	1	-1.107	1.55
PPIH	-11.22	12	-1.91	0.0284	521	0.977	0.972	17535	1	-0.354	1.55
C9	-11.23	12	-1.91	0.0283	518	0.977	0.972	17538	1	-0.774	1.55
STK11	-11.22	12	-1.9	0.0284	522	0.977	0.972	17534	1	-0.886	1.55
ACACA	-11.26	12	-1.91	0.0279	514	0.977	0.972	17542	1	-0.723	1.55
ALG13	-11.19	12	-1.9	0.0288	528	0.977	0.971	17528	1	-1.035	1.54
LacZ	-54.87	288	-1.9	0.0287	526	0.977	0.971	17530	1	-0.809	1.54
ZNF74	-11.2	12	-1.9	0.0287	527	0.977	0.971	17529	1	-0.53	1.54
E2F7	-11.2	12	-1.9	0.0287	525	0.977	0.971	17531	1	-0.827	1.54
KANSL1	-11.17	12	-1.89	0.0291	532	0.977	0.971	17524	1	-0.897	1.54
TRMT5	-11.22	12	-1.91	0.0284	520	0.977	0.972	17536	1	-1.579	1.55
CCT2	-10.73	11	-1.9	0.0286	523	0.977	0.971	17533	1	-1.71	1.54
MICAL3	-11.18	12	-1.9	0.0289	529	0.977	0.971	17527	1	-0.821	1.54
PQBP1	-11.17	12	-1.89	0.0291	531	0.977	0.971	17525	1	-0.794	1.54
BAG2	-11.16	12	-1.89	0.0293	536	0.977	0.971	17520	1	-0.519	1.53
CHCHD4	-11.17	12	-1.89	0.0292	534	0.977	0.971	17522	1	-1.016	1.53
LIPT2	-11.17	12	-1.89	0.0291	530	0.977	0.971	17526	1	-0.852	1.54
THAP8	-11.14	12	-1.89	0.0296	540	0.977	0.97	17516	1	-0.734	1.53
DOCK7	-11.17	12	-1.89	0.0291	533	0.977	0.971	17523	1	-0.517	1.54
KIAA1644	-11.16	12	-1.89	0.0293	535	0.977	0.971	17521	1	-0.523	1.53
EXOC4	-11.15	12	-1.89	0.0294	539	0.977	0.971	17517	1	-1.519	1.53
OR4D6	-11.16	12	-1.89	0.0293	537	0.977	0.971	17519	1	-0.427	1.53
DHDDS	-11.15	12	-1.89	0.0294	538	0.977	0.971	17518	1	-1.512	1.53
NDOR1	-11.13	12	-1.89	0.0297	542	0.977	0.97	17514	1	-0.652	1.53
PPWD1	-11.13	12	-1.88	0.0298	543	0.977	0.97	17513	1	-0.98	1.53
TRABD2A	-11.14	12	-1.89	0.0296	541	0.977	0.97	17515	1	-0.54	1.53
DCTN6	-11.12	12	-1.88	0.0298	545	0.977	0.97	17511	1	-0.915	1.53
DYNC1I2	-11.12	12	-1.88	0.0299	546	0.977	0.97	17510	1	-1.039	1.52
GUK1	-11.13	12	-1.88	0.0298	544	0.977	0.97	17512	1	-0.68	1.53
ZNF76	-11.09	12	-1.88	0.0304	551	0.977	0.97	17505	1	-0.344	1.52
FGD1	-11.12	12	-1.88	0.0299	547	0.977	0.97	17509	1	-0.516	1.52
MTRR	-11.08	12	-1.87	0.0305	552	0.977	0.97	17504	1	-0.595	1.52
SETD1A	-11.1	12	-1.88	0.0302	548	0.977	0.97	17508	1	-1.025	1.52
ORC4	-11.09	12	-1.88	0.0303	550	0.977	0.97	17506	1	-0.709	1.52
UCN	-11.06	12	-1.87	0.0309	557	0.977	0.969	17499	1	-0.731	1.51
DDX47	-11.06	12	-1.87	0.0309	558	0.977	0.969	17498	1	-1.272	1.51
PUF60	-11.08	12	-1.87	0.0305	553	0.977	0.969	17503	1	-1.175	1.52
NDC1	-11.08	12	-1.87	0.0306	554	0.977	0.969	17502	1	-0.758	1.51
RNPC3	-11.07	12	-1.87	0.0307	555	0.977	0.969	17501	1	-2.004	1.51
TIMM23	-11.09	12	-1.88	0.0303	549	0.977	0.97	17507	1	-0.913	1.52
PRRC2A	-11.07	12	-1.87	0.0307	556	0.977	0.969	17500	1	-0.757	1.51
ATP6V1F	-11.05	12	-1.87	0.0311	559	0.977	0.969	17497	1	-0.807	1.51
NIPA1	-11	12	-1.85	0.0319	567	0.977	0.968	17489	0.999	-0.503	1.5
EXOC1	-11.01	12	-1.86	0.0316	562	0.977	0.968	17494	0.999	-1.028	1.5
IGLL1	-11.01	12	-1.86	0.0317	564	0.977	0.968	17492	0.999	-0.837	1.5
IQCD	-11	12	-1.86	0.0318	565	0.977	0.968	17491	0.999	-1.025	1.5
FAM89B	-11.01	12	-1.86	0.0317	563	0.977	0.968	17493	0.999	-0.601	1.5
GNB4	-11.02	12	-1.86	0.0315	560	0.977	0.969	17496	0.999	-0.849	1.5
CRKL	-11.02	12	-1.86	0.0316	561	0.977	0.968	17495	0.999	-1.077	1.5
TSHZ2	-11	12	-1.86	0.0318	566	0.977	0.968	17490	0.999	-0.827	1.5
LDHD	-10.94	12	-1.84	0.0328	573	0.977	0.967	17483	0.999	-0.256	1.48
CENPH	-10.96	12	-1.85	0.0324	569	0.977	0.968	17487	0.999	-0.628	1.49
PPA1	-10.98	12	-1.85	0.0321	568	0.977	0.968	17488	0.999	-0.991	1.49
DNM2	-10.94	12	-1.84	0.0328	572	0.977	0.967	17484	0.999	-1.234	1.48
DDOST	-10.96	12	-1.85	0.0325	571	0.977	0.967	17485	0.999	-0.931	1.49
CDH2	-10.96	12	-1.85	0.0325	570	0.977	0.967	17486	0.999	-0.806	1.49
DNAJC10	-10.91	12	-1.83	0.0333	577	0.977	0.967	17479	0.999	-0.673	1.48
SIDT2	-10.93	12	-1.84	0.0329	574	0.977	0.967	17482	0.999	-0.577	1.48
MED18	-10.92	12	-1.84	0.0332	576	0.977	0.967	17480	0.999	-2.239	1.48
LGALS3BP	-10.89	12	-1.83	0.0337	581	0.977	0.966	17475	0.998	-1.122	1.47
APLN	-10.9	12	-1.83	0.0335	579	0.977	0.967	17477	0.999	-0.701	1.47
PRR24	-10.89	12	-1.83	0.0337	582	0.977	0.966	17474	0.998	-0.698	1.47
TCEB2	-10.91	12	-1.83	0.0333	578	0.977	0.967	17478	0.999	-1.357	1.48
SORT1	-10.88	12	-1.83	0.0339	583	0.977	0.966	17473	0.998	-1.033	1.47
FBLL1	-10.87	12	-1.82	0.034	585	0.977	0.966	17471	0.998	-0.602	1.47
USP5	-10.92	12	-1.84	0.0332	575	0.977	0.967	17481	0.999	-0.478	1.48
TMA16	-10.87	12	-1.82	0.034	584	0.977	0.966	17472	0.998	-0.908	1.47
HIPK1	-10.86	12	-1.82	0.0342	590	0.977	0.966	17466	0.998	-0.397	1.47
MDC1	-10.89	12	-1.83	0.0337	580	0.977	0.966	17476	0.998	-0.383	1.47
FGF4	-10.85	12	-1.82	0.0344	592	0.977	0.966	17464	0.998	-0.675	1.46
KIFAP3	-10.84	12	-1.82	0.0345	595	0.977	0.965	17461	0.998	-0.411	1.46
YARS2	-10.86	12	-1.82	0.0341	587	0.977	0.966	17469	0.998	-0.431	1.47
ABHD16A	-10.86	12	-1.82	0.0341	588	0.977	0.966	17468	0.998	-0.876	1.47
PSMC6	-10.38	11	-1.82	0.0345	593	0.977	0.966	17463	0.998	-2.186	1.46
PRKCZ	-10.87	12	-1.82	0.034	586	0.977	0.966	17470	0.998	-0.831	1.47
SEH1L	-10.86	12	-1.82	0.0342	589	0.977	0.966	17467	0.998	-0.974	1.47
SERINC2	-10.79	12	-1.81	0.0354	608	0.977	0.965	17448	0.998	-0.623	1.45
TBCE	-10.81	12	-1.81	0.035	603	0.977	0.965	17453	0.998	-0.958	1.46
ECHDC1	-10.85	12	-1.82	0.0343	591	0.977	0.966	17465	0.998	-0.667	1.46
KDM4D	-10.8	12	-1.81	0.0351	605	0.977	0.965	17451	0.998	-0.835	1.45
ADNP2	-10.83	12	-1.82	0.0348	597	0.977	0.965	17459	0.998	-0.632	1.46
GNB2	-10.82	12	-1.81	0.0349	601	0.977	0.965	17455	0.998	-0.867	1.46
CENPL	-10.82	12	-1.81	0.0348	598	0.977	0.965	17458	0.998	-0.723	1.46
USPL1	-10.83	12	-1.82	0.0347	596	0.977	0.965	17460	0.998	-0.704	1.46
ARL4D	-10.82	12	-1.81	0.0349	599	0.977	0.965	17457	0.998	-0.377	1.46
DNAJA3	-10.82	12	-1.81	0.0349	602	0.977	0.965	17454	0.998	-0.98	1.46
TMX2	-10.82	12	-1.81	0.0349	600	0.977	0.965	17456	0.998	-0.644	1.46
MCMBP	-10.84	12	-1.82	0.0345	594	0.977	0.965	17462	0.998	-0.487	1.46
DAP3	-10.81	12	-1.81	0.0351	604	0.977	0.965	17452	0.998	-0.905	1.45
BTBD1	-10.78	12	-1.81	0.0355	609	0.977	0.965	17447	0.998	-0.356	1.45
PIAS2	-10.76	12	-1.8	0.0359	612	0.977	0.964	17444	0.998	-0.519	1.44
LYPD2	-10.8	12	-1.81	0.0352	606	0.977	0.965	17450	0.998	-0.398	1.45
CABLES1	-10.77	12	-1.8	0.0357	610	0.977	0.964	17446	0.998	-1.332	1.45
CCNE2	-10.76	12	-1.8	0.036	613	0.977	0.964	17443	0.998	-0.831	1.44
KLHL4	-10.74	12	-1.8	0.0363	620	0.977	0.964	17436	0.998	-0.519	1.44
FCHSD2	-10.8	12	-1.81	0.0352	607	0.977	0.965	17449	0.998	-0.573	1.45
CERS4	-10.75	12	-1.8	0.0361	614	0.977	0.964	17442	0.998	-0.621	1.44
NLRP2	-10.71	12	-1.79	0.0368	625	0.977	0.963	17431	0.998	-0.685	1.43
ATP2A3	-10.75	12	-1.8	0.0362	618	0.977	0.964	17438	0.998	-0.673	1.44
IDH3A	-10.73	12	-1.79	0.0365	622	0.977	0.963	17434	0.998	-0.395	1.44
MBNL1	-10.75	12	-1.8	0.0362	617	0.977	0.964	17439	0.998	-0.663	1.44
ELP3	-10.75	12	-1.8	0.0361	615	0.977	0.964	17441	0.998	-0.969	1.44
GBP6	-10.71	12	-1.79	0.0369	628	0.977	0.963	17428	0.998	-0.748	1.43
GAPDH	-10.74	12	-1.8	0.0362	619	0.977	0.964	17437	0.998	-1.335	1.44
EOMES	-10.76	12	-1.8	0.0359	611	0.977	0.964	17445	0.998	-0.746	1.44
GPS1	-10.73	12	-1.79	0.0365	621	0.977	0.963	17435	0.998	-0.802	1.44
TTC27	-10.72	12	-1.79	0.0366	623	0.977	0.963	17433	0.998	-1.346	1.44
RSF1	-10.72	12	-1.79	0.0367	624	0.977	0.963	17432	0.998	-0.651	1.44
ZNF263	-10.75	12	-1.8	0.0362	616	0.977	0.964	17440	0.998	-0.536	1.44
CAMK1G	-10.7	12	-1.79	0.0371	630	0.977	0.963	17426	0.998	-0.642	1.43
ATP6V0B	-10.69	12	-1.78	0.0372	632	0.977	0.963	17424	0.998	-0.615	1.43
CHSY3	-10.71	12	-1.79	0.0369	626	0.977	0.963	17430	0.998	-0.809	1.43
EIF2S3	-10.24	11	-1.79	0.0371	631	0.977	0.963	17425	0.998	-1.04	1.43
TM2D3	-10.68	12	-1.78	0.0373	635	0.977	0.963	17421	0.998	-0.724	1.43
PHF6	-10.65	12	-1.78	0.0379	640	0.977	0.962	17416	0.997	-0.886	1.42
KIAA1279	-10.69	12	-1.78	0.0372	633	0.977	0.963	17423	0.998	-0.802	1.43
GUCA1C	-10.68	12	-1.78	0.0374	636	0.977	0.963	17420	0.998	-0.84	1.43
TMEM17	-10.69	12	-1.78	0.0372	634	0.977	0.963	17422	0.998	-0.833	1.43
HIVEP2	-10.67	12	-1.78	0.0375	637	0.977	0.962	17419	0.998	-0.68	1.43
SPPL2C	-10.67	12	-1.78	0.0376	638	0.977	0.962	17418	0.998	-0.459	1.42
TBL1XR1	-10.71	12	-1.79	0.0369	627	0.977	0.963	17429	0.998	-1.074	1.43
NACC2	-10.7	12	-1.79	0.037	629	0.977	0.963	17427	0.998	-0.892	1.43
HIBADH	-10.64	12	-1.77	0.0381	644	0.977	0.962	17412	0.997	-0.689	1.42
TONSL	-10.65	12	-1.77	0.038	642	0.977	0.962	17414	0.997	-0.533	1.42
LSM3	-10.64	12	-1.77	0.0382	645	0.977	0.962	17411	0.997	-1.065	1.42
MOCS3	-10.66	12	-1.78	0.0379	639	0.977	0.962	17417	0.997	-0.876	1.42
HIST1H1D	-10.63	12	-1.77	0.0383	648	0.977	0.962	17408	0.997	-0.689	1.42
WAPAL	-10.63	12	-1.77	0.0383	647	0.977	0.962	17409	0.997	-1.733	1.42
ZNHIT2	-10.65	12	-1.78	0.0379	641	0.977	0.962	17415	0.997	-1.552	1.42
ATP5H	-10.61	12	-1.77	0.0387	653	0.977	0.961	17403	0.997	-0.898	1.41
KIF4A	-10.62	12	-1.77	0.0384	651	0.977	0.962	17405	0.997	-0.978	1.42
TNFSF13	-10.63	12	-1.77	0.0383	646	0.977	0.962	17410	0.997	-0.806	1.42
TXNDC17	-10.63	12	-1.77	0.0383	649	0.977	0.962	17407	0.997	-0.9	1.42
NKX1-2	-10.65	12	-1.77	0.038	643	0.977	0.962	17413	0.997	-0.908	1.42
CENPT	-10.62	12	-1.77	0.0385	652	0.977	0.961	17404	0.997	-0.429	1.41
CHIC2	-10.61	12	-1.77	0.0387	654	0.977	0.961	17402	0.997	-0.728	1.41
CLP1	-10.63	12	-1.77	0.0384	650	0.977	0.962	17406	0.997	-0.258	1.42
GRB2	-10.6	12	-1.76	0.0388	656	0.977	0.961	17400	0.997	-1.607	1.41
SYBU	-10.57	12	-1.76	0.0394	659	0.977	0.961	17397	0.997	-0.577	1.4
NCAPG2	-10.59	12	-1.76	0.0391	658	0.977	0.961	17398	0.997	-1.116	1.41
KIF18A	-10.56	12	-1.76	0.0396	662	0.977	0.96	17394	0.997	-0.378	1.4
GPN1	-10.14	11	-1.76	0.039	657	0.977	0.961	17399	0.997	-1.42	1.41
COMMD5	-10.56	12	-1.75	0.0397	667	0.977	0.96	17389	0.997	-0.638	1.4
PRICKLE2	-10.57	12	-1.76	0.0396	661	0.977	0.96	17395	0.997	-0.818	1.4
PCDHGC5	-10.56	12	-1.76	0.0396	663	0.977	0.96	17393	0.997	-0.768	1.4
NT5DC1	-10.56	12	-1.75	0.0396	664	0.977	0.96	17392	0.997	-0.786	1.4
CLIC4	-10.61	12	-1.77	0.0387	655	0.977	0.961	17401	0.997	-0.523	1.41
CTC-534A2.2	-10.55	12	-1.75	0.04	670	0.977	0.96	17386	0.997	-0.803	1.4
CDIPT	-10.54	12	-1.75	0.04	671	0.977	0.96	17385	0.997	-1.604	1.4
FOSL1	-10.57	12	-1.76	0.0395	660	0.977	0.96	17396	0.997	-1.304	1.4
PFKFB4	-10.56	12	-1.75	0.0396	665	0.977	0.96	17391	0.997	-0.67	1.4
CD79A	-10.56	12	-1.75	0.0397	666	0.977	0.96	17390	0.997	-0.488	1.4
RHOA	-10.55	12	-1.75	0.0399	669	0.977	0.96	17387	0.997	-0.647	1.4
SLMO1	-10.52	12	-1.75	0.0405	676	0.977	0.96	17380	0.997	-0.545	1.39
RPA2	-10.54	12	-1.75	0.04	673	0.977	0.96	17383	0.997	-1.365	1.4
INTS3	-10.56	12	-1.75	0.0398	668	0.977	0.96	17388	0.997	-1.062	1.4
CDH23	-10.51	12	-1.74	0.0406	677	0.977	0.959	17379	0.997	-0.746	1.39
NUP62	-10.51	12	-1.74	0.0406	678	0.977	0.959	17378	0.997	-0.622	1.39
LCE6A	-10.54	12	-1.75	0.04	672	0.977	0.96	17384	0.997	-0.686	1.4
SUZ12	-10.51	12	-1.74	0.0406	679	0.977	0.959	17377	0.997	-0.7	1.39
SDC3	-10.54	12	-1.75	0.0401	674	0.977	0.96	17382	0.997	-0.617	1.4
FAM135B	-10.5	12	-1.74	0.0409	683	0.977	0.959	17373	0.997	-0.651	1.39
KDM4B	-10.49	12	-1.74	0.0412	685	0.977	0.959	17371	0.997	-0.502	1.39
CENPC	-10.51	12	-1.74	0.0407	681	0.977	0.959	17375	0.997	-1.442	1.39
ABCA12	-10.48	12	-1.74	0.0412	686	0.977	0.959	17370	0.997	-0.669	1.39
GJA10	-10.51	12	-1.74	0.0407	680	0.977	0.959	17376	0.997	-0.596	1.39
CTRL	-10.49	12	-1.74	0.041	684	0.977	0.959	17372	0.997	-0.813	1.39
HTR3D	-10.48	12	-1.74	0.0412	688	0.977	0.959	17368	0.997	-0.559	1.39
JTB	-10.5	12	-1.74	0.0409	682	0.977	0.959	17374	0.997	-1.314	1.39
TLN1	-10.03	11	-1.74	0.0412	689	0.977	0.959	17367	0.997	-0.564	1.39
ISG20	-10.47	12	-1.73	0.0415	692	0.977	0.959	17364	0.997	-0.529	1.38
PRKCSH	-10.54	12	-1.75	0.0402	675	0.977	0.96	17381	0.997	-0.876	1.4
OR4C3	-10.48	12	-1.74	0.0412	687	0.977	0.959	17369	0.997	-0.685	1.39
S100A9	-10.45	12	-1.73	0.0419	698	0.977	0.958	17358	0.997	-0.72	1.38
PTPRA	-10.47	12	-1.73	0.0414	690	0.977	0.959	17366	0.997	-0.602	1.38
CCDC173	-10.47	12	-1.73	0.0415	693	0.977	0.958	17363	0.997	-0.598	1.38
PSMG4	-10.46	12	-1.73	0.0416	694	0.977	0.958	17362	0.997	-1.273	1.38
ESPN	-10.45	12	-1.73	0.042	699	0.977	0.958	17357	0.997	-0.535	1.38
NSF	-10.46	12	-1.73	0.0418	695	0.977	0.958	17361	0.997	-1.042	1.38
MB	-10.46	12	-1.73	0.0418	696	0.977	0.958	17360	0.997	-0.383	1.38
MTCH2	-10.47	12	-1.73	0.0415	691	0.977	0.959	17365	0.997	-0.791	1.38
SUPT6H	-10.45	12	-1.73	0.0418	697	0.977	0.958	17359	0.997	-1.053	1.38
TRRAP	-10.44	12	-1.73	0.042	700	0.977	0.958	17356	0.997	-1.797	1.38
STOX1	-10.42	12	-1.72	0.0425	704	0.977	0.957	17352	0.996	-0.694	1.37
TARDBP	-10.43	12	-1.73	0.0422	702	0.977	0.958	17354	0.996	-1.133	1.37
GCKR	-10.44	12	-1.73	0.0422	701	0.977	0.958	17355	0.996	-0.375	1.37
CRBN	-10.42	12	-1.72	0.0425	703	0.977	0.957	17353	0.996	-0.626	1.37
TOMM70A	-10.42	12	-1.72	0.0426	705	0.977	0.957	17351	0.996	-0.643	1.37
DCTN3	-10.41	12	-1.72	0.0427	708	0.977	0.957	17348	0.996	-0.617	1.37
G3BP1	-10.4	12	-1.72	0.0429	715	0.977	0.957	17341	0.996	-0.822	1.37
PPIP5K1	-10.4	12	-1.72	0.0428	713	0.977	0.957	17343	0.996	-0.323	1.37
FOLR1	-10.4	12	-1.72	0.0429	714	0.977	0.957	17342	0.996	-0.739	1.37
GRM3	-10.41	12	-1.72	0.0427	707	0.977	0.957	17349	0.996	-0.976	1.37
KPNA2	-10.41	12	-1.72	0.0426	706	0.977	0.957	17350	0.996	-0.787	1.37
LPA	-10.41	12	-1.72	0.0427	710	0.977	0.957	17346	0.996	-0.656	1.37
CIAPIN1	-10.41	12	-1.72	0.0428	711	0.977	0.957	17345	0.996	-1.245	1.37
MECR	-10.41	12	-1.72	0.0427	709	0.977	0.957	17347	0.996	-0.987	1.37
PFDN2	-10.37	12	-1.71	0.0435	723	0.977	0.957	17333	0.996	-0.842	1.36
EFHB	-10.38	12	-1.71	0.0433	717	0.977	0.957	17339	0.996	-0.735	1.36
ANKLE1	-10.41	12	-1.72	0.0428	712	0.977	0.957	17344	0.996	-0.52	1.37
PSMA5	-10.37	12	-1.71	0.0435	722	0.977	0.957	17334	0.996	-2.404	1.36
ZNF121	-10.38	12	-1.71	0.0434	720	0.977	0.957	17336	0.996	-0.421	1.36
MCM2	-10.38	12	-1.71	0.0434	719	0.977	0.957	17337	0.996	-1.373	1.36
SRSF4	-10.37	12	-1.71	0.0434	721	0.977	0.957	17335	0.996	-0.315	1.36
AARS	-10.35	12	-1.71	0.044	726	0.977	0.956	17330	0.996	-1.664	1.36
UBE3B	-10.39	12	-1.71	0.0432	716	0.977	0.957	17340	0.996	-0.8	1.36
NONO	-10.34	12	-1.71	0.0441	728	0.977	0.956	17328	0.996	-0.725	1.36
SCP2D1	-10.34	12	-1.7	0.0442	730	0.977	0.956	17326	0.996	-1.016	1.35
XRCC3	-10.34	12	-1.71	0.0441	729	0.977	0.956	17327	0.996	-0.63	1.36
RBM17	-10.38	12	-1.71	0.0434	718	0.977	0.957	17338	0.996	-0.878	1.36
EMB	-10.31	12	-1.7	0.0447	740	0.977	0.955	17316	0.996	-0.542	1.35
IL1R2	-10.35	12	-1.71	0.044	727	0.977	0.956	17329	0.996	-0.608	1.36
ACSL3	-10.33	12	-1.7	0.0444	732	0.977	0.956	17324	0.996	-0.273	1.35
ACKR3	-10.36	12	-1.71	0.0437	724	0.977	0.956	17332	0.996	-0.819	1.36
NEK1	-10.3	12	-1.69	0.0451	749	0.977	0.955	17307	0.996	-0.524	1.35
G6PC2	-10.32	12	-1.7	0.0447	736	0.977	0.955	17320	0.996	-0.924	1.35
ASCC3	-10.32	12	-1.7	0.0447	737	0.977	0.955	17319	0.996	-0.449	1.35
MARCH8	-10.35	12	-1.71	0.044	725	0.977	0.956	17331	0.996	-1.113	1.36
MAPK9	-10.33	12	-1.7	0.0445	734	0.977	0.956	17322	0.996	-0.504	1.35
STEAP4	-10.31	12	-1.7	0.0448	742	0.977	0.955	17314	0.996	-0.713	1.35
LIN7A	-10.33	12	-1.7	0.0445	733	0.977	0.956	17323	0.996	-0.709	1.35
PAG1	-10.32	12	-1.7	0.0447	738	0.977	0.955	17318	0.996	-0.629	1.35
UBE3C	-10.31	12	-1.7	0.0448	743	0.977	0.955	17313	0.996	-0.891	1.35
EPHB6	-10.3	12	-1.7	0.045	746	0.977	0.955	17310	0.996	-0.589	1.35
SGMS1	-10.32	12	-1.7	0.0447	735	0.977	0.955	17321	0.996	-0.545	1.35
SOD3	-10.31	12	-1.7	0.0448	741	0.977	0.955	17315	0.996	-0.596	1.35
C6orf226	-10.33	12	-1.7	0.0443	731	0.977	0.956	17325	0.996	-1.006	1.35
SRSF1	-10.3	12	-1.7	0.0449	745	0.977	0.955	17311	0.996	-1.841	1.35
EPHX4	-10.31	12	-1.7	0.0447	739	0.977	0.955	17317	0.996	-0.588	1.35
NUP98	-10.28	12	-1.69	0.0454	751	0.977	0.955	17305	0.996	-1.106	1.34
AARD	-10.3	12	-1.69	0.0451	748	0.977	0.955	17308	0.996	-0.641	1.35
UBA2	-10.28	12	-1.69	0.0455	754	0.977	0.954	17302	0.996	-1.35	1.34
UBL5	-10.28	12	-1.69	0.0455	752	0.977	0.955	17304	0.996	-0.971	1.34
USP39	-10.3	12	-1.7	0.0449	744	0.977	0.955	17312	0.996	-1.014	1.35
SNRPB2	-10.3	12	-1.7	0.045	747	0.977	0.955	17309	0.996	-1.023	1.35
GAL3ST4	-10.3	12	-1.69	0.0451	750	0.977	0.955	17306	0.996	-0.475	1.35
CYTH4	-10.28	12	-1.69	0.0455	753	0.977	0.955	17303	0.996	-0.56	1.34
PRG4	-10.27	12	-1.69	0.0457	759	0.977	0.954	17297	0.996	-0.456	1.34
ZSWIM1	-10.28	12	-1.69	0.0455	756	0.977	0.954	17300	0.996	-0.649	1.34
ATP6V1D	-10.26	12	-1.69	0.0458	760	0.977	0.954	17296	0.996	-0.961	1.34
PFN1	-10.27	12	-1.69	0.0457	758	0.977	0.954	17298	0.996	-0.587	1.34
HNRNPA0	-10.26	12	-1.69	0.0459	761	0.977	0.954	17295	0.996	-1.098	1.34
FAM159A	-10.27	12	-1.69	0.0456	757	0.977	0.954	17299	0.996	-0.624	1.34
HAPLN4	-10.28	12	-1.69	0.0455	755	0.977	0.954	17301	0.996	-0.714	1.34
OR51Q1	-10.25	12	-1.68	0.0461	762	0.977	0.954	17294	0.996	-0.76	1.34
FGF12	-10.25	12	-1.68	0.0462	763	0.977	0.954	17293	0.996	-0.647	1.34
HELQ	-10.21	12	-1.68	0.0469	769	0.977	0.953	17287	0.995	-0.997	1.33
NUDC	-10.24	12	-1.68	0.0462	764	0.977	0.954	17292	0.996	-1.21	1.34
TAMM41	-10.24	12	-1.68	0.0464	765	0.977	0.954	17291	0.996	-0.67	1.33
ADI1	-10.21	12	-1.68	0.0469	770	0.977	0.953	17286	0.995	-0.365	1.33
ZACN	-10.19	12	-1.67	0.0474	779	0.977	0.953	17277	0.995	-0.698	1.32
BRIX1	-10.24	12	-1.68	0.0464	766	0.977	0.954	17290	0.996	-0.578	1.33
ZNF84	-10.2	12	-1.67	0.0473	776	0.977	0.953	17280	0.995	-0.472	1.33
C6orf163	-10.23	12	-1.68	0.0466	767	0.977	0.953	17289	0.996	-0.454	1.33
CHTF8	-10.22	12	-1.68	0.0467	768	0.977	0.953	17288	0.996	-0.23	1.33
HAUS8	-10.2	12	-1.67	0.0471	773	0.977	0.953	17283	0.995	-0.787	1.33
PATE2	-10.2	12	-1.67	0.0473	775	0.977	0.953	17281	0.995	-0.599	1.33
ELP2	-10.21	12	-1.67	0.047	771	0.977	0.953	17285	0.995	-0.802	1.33
VIPR1	-10.21	12	-1.67	0.0471	772	0.977	0.953	17284	0.995	-0.482	1.33
ATG5	-10.2	12	-1.67	0.0472	774	0.977	0.953	17282	0.995	-0.659	1.33
PRKX	-10.18	12	-1.67	0.0477	784	0.977	0.952	17272	0.995	-0.689	1.32
EYA4	-10.18	12	-1.67	0.0476	782	0.977	0.952	17274	0.995	-0.754	1.32
NHP2L1	-10.18	12	-1.67	0.0477	785	0.977	0.952	17271	0.995	-1.283	1.32
PDZD7	-10.19	12	-1.67	0.0475	781	0.977	0.953	17275	0.995	-0.622	1.32
WFIKKN1	-10.17	12	-1.67	0.0479	786	0.977	0.952	17270	0.995	-0.586	1.32
SF3A2	-10.2	12	-1.67	0.0473	777	0.977	0.953	17279	0.995	-1.498	1.33
FAM103A1	-10.18	12	-1.67	0.0476	783	0.977	0.952	17273	0.995	-0.774	1.32
POM121L2	-10.2	12	-1.67	0.0473	778	0.977	0.953	17278	0.995	-0.829	1.33
MGEA5	-10.15	12	-1.66	0.0483	789	0.977	0.952	17267	0.995	-0.546	1.32
THOC2	-10.17	12	-1.66	0.048	787	0.977	0.952	17269	0.995	-2.136	1.32
KLHDC9	-10.19	12	-1.67	0.0475	780	0.977	0.953	17276	0.995	-0.358	1.32
PRPF19	-10.15	12	-1.66	0.0483	788	0.977	0.952	17268	0.995	-1.249	1.32
ATAD3A	-8.78	9	-1.66	0.0487	798	0.977	0.951	17258	0.995	-0.882	1.31
ESR2	-10.14	12	-1.66	0.0486	795	0.977	0.951	17261	0.995	-0.674	1.31
PSMA6	-10.15	12	-1.66	0.0484	791	0.977	0.952	17265	0.995	-0.974	1.32
DACH2	-10.14	12	-1.66	0.0485	793	0.977	0.951	17263	0.995	-0.81	1.31
TUSC2	-10.14	12	-1.66	0.0487	797	0.977	0.951	17259	0.995	-0.744	1.31
C7orf61	-10.13	12	-1.66	0.0489	799	0.977	0.951	17257	0.995	-0.697	1.31
ZNF266	-10.15	12	-1.66	0.0484	792	0.977	0.952	17264	0.995	-0.901	1.32
PRPF4B	-10.14	12	-1.66	0.0486	794	0.977	0.951	17262	0.995	-0.509	1.31
NSL1	-10.12	12	-1.66	0.0489	800	0.977	0.951	17256	0.995	-1.66	1.31
IZUMO4	-10.12	12	-1.65	0.049	801	0.977	0.951	17255	0.995	-0.554	1.31
DHRS7C	-10.15	12	-1.66	0.0484	790	0.977	0.952	17266	0.995	-0.668	1.32
KMT2A	-10.14	12	-1.66	0.0486	796	0.977	0.951	17260	0.995	-0.605	1.31
SCXA	-10.11	12	-1.65	0.0492	805	0.977	0.951	17251	0.995	-0.548	1.31
AASDHPPT	-10.11	12	-1.65	0.0494	809	0.977	0.951	17247	0.995	-0.556	1.31
MYH9	-10.09	12	-1.65	0.0497	813	0.977	0.95	17243	0.995	-0.492	1.3
NR1D1	-10.12	12	-1.65	0.0491	802	0.977	0.951	17254	0.995	-0.763	1.31
FAM150A	-10.12	12	-1.65	0.0491	804	0.977	0.951	17252	0.995	-0.563	1.31
NR0B2	-9.68	11	-1.65	0.0492	806	0.977	0.951	17250	0.995	-0.921	1.31
FGFR1OP2	-10.07	12	-1.64	0.0502	818	0.977	0.95	17238	0.995	-0.709	1.3
WRB	-10.11	12	-1.65	0.0493	807	0.977	0.951	17249	0.995	-0.854	1.31
CRYBG3	-10.09	12	-1.65	0.0497	812	0.977	0.95	17244	0.995	-0.7	1.3
FKBP7	-10.08	12	-1.65	0.0499	815	0.977	0.95	17241	0.995	-0.89	1.3
SPTLC2	-10.1	12	-1.65	0.0495	811	0.977	0.95	17245	0.995	-0.978	1.31
HAUS5	-10.07	12	-1.64	0.0501	817	0.977	0.95	17239	0.995	-0.577	1.3
ABCG4	-10.08	12	-1.65	0.0499	816	0.977	0.95	17240	0.995	-1.105	1.3
CYGB	-10.12	12	-1.65	0.0491	803	0.977	0.951	17253	0.995	-0.601	1.31
NFS1	-10.11	12	-1.65	0.0494	808	0.977	0.951	17248	0.995	-1.108	1.31
PPP1R3A	-10.04	12	-1.64	0.051	826	0.977	0.949	17230	0.994	-0.644	1.29
TMEM238	-10.11	12	-1.65	0.0494	810	0.977	0.951	17246	0.995	-1.165	1.31
KDM5C	-10.09	12	-1.65	0.0497	814	0.977	0.95	17242	0.995	-0.795	1.3
FANCL	-10.07	12	-1.64	0.0503	819	0.977	0.95	17237	0.995	-0.299	1.3
PRIM1	-10.06	12	-1.64	0.0505	821	0.977	0.95	17235	0.995	-1.468	1.3
TTC33	-10.04	12	-1.63	0.0511	827	0.977	0.949	17229	0.994	-0.713	1.29
NOL11	-10.05	12	-1.64	0.0506	822	0.977	0.949	17234	0.995	-1.205	1.3
SGMS2	-10.03	12	-1.63	0.0512	831	0.977	0.949	17225	0.994	-0.473	1.29
ARMC6	-10.05	12	-1.64	0.0508	824	0.977	0.949	17232	0.995	-0.828	1.29
GET4	-10.05	12	-1.64	0.0507	823	0.977	0.949	17233	0.995	-0.53	1.29
ACE	-10.04	12	-1.64	0.0508	825	0.977	0.949	17231	0.995	-0.723	1.29
PLA2G7	-10.03	12	-1.63	0.0512	830	0.977	0.949	17226	0.994	-0.699	1.29
IL11RA	-10.03	12	-1.63	0.0512	829	0.977	0.949	17227	0.994	-0.776	1.29
DOPEY1	-10.01	12	-1.63	0.0516	839	0.977	0.948	17217	0.994	-0.579	1.29
WDR77	-10.02	12	-1.63	0.0514	836	0.977	0.949	17220	0.994	-1.426	1.29
WDR61	-10.02	12	-1.63	0.0515	837	0.977	0.948	17219	0.994	-1.788	1.29
NAP1L1	-10.03	12	-1.63	0.0512	832	0.977	0.949	17224	0.994	-0.996	1.29
CLDN4	-10.02	12	-1.63	0.0514	835	0.977	0.949	17221	0.994	-0.738	1.29
PARP16	-10.07	12	-1.64	0.0503	820	0.977	0.95	17236	0.995	-0.225	1.3
DHRS11	-10.03	12	-1.63	0.0511	828	0.977	0.949	17228	0.994	-0.85	1.29
MAML1	-10.01	12	-1.63	0.0517	840	0.977	0.948	17216	0.994	-0.663	1.29
RSBN1	-10.02	12	-1.63	0.0513	833	0.977	0.949	17223	0.994	-0.511	1.29
FLII	-10	12	-1.63	0.052	847	0.977	0.948	17209	0.994	-0.567	1.28
TM2D1	-9.99	12	-1.62	0.0522	850	0.977	0.948	17206	0.994	-0.624	1.28
IDUA	-10	12	-1.63	0.052	845	0.977	0.948	17211	0.994	-1.122	1.28
KLF17	-9.99	12	-1.62	0.0522	848	0.977	0.948	17208	0.994	-0.401	1.28
TATDN3	-10.02	12	-1.63	0.0513	834	0.977	0.949	17222	0.994	-0.409	1.29
GP5	-10.01	12	-1.63	0.0516	838	0.977	0.948	17218	0.994	-0.658	1.29
UQCR10	-9.96	12	-1.62	0.0528	856	0.977	0.947	17200	0.994	-0.478	1.28
TRIT1	-10.01	12	-1.63	0.0518	841	0.977	0.948	17215	0.994	-0.657	1.29
CARD18	-10	12	-1.63	0.052	846	0.977	0.948	17210	0.994	-0.452	1.28
ELP6	-9.97	12	-1.62	0.0525	853	0.977	0.947	17203	0.994	-1.241	1.28
KCNK9	-9.98	12	-1.62	0.0523	852	0.977	0.948	17204	0.994	-0.893	1.28
ANGPTL4	-9.96	12	-1.62	0.053	861	0.977	0.947	17195	0.994	-0.726	1.28
DTL	-10	12	-1.63	0.052	844	0.977	0.948	17212	0.994	-0.94	1.28
PAK2	-10	12	-1.63	0.052	843	0.977	0.948	17213	0.994	-0.765	1.28
SIPA1	-9.98	12	-1.62	0.0523	851	0.977	0.948	17205	0.994	-0.811	1.28
OTUD1	-9.99	12	-1.62	0.0522	849	0.977	0.948	17207	0.994	-0.547	1.28
GSE1	-9.96	12	-1.62	0.053	860	0.977	0.947	17196	0.994	-1.019	1.28
MTCH1	-10	12	-1.63	0.0519	842	0.977	0.948	17214	0.994	-0.854	1.28
NETO2	-9.97	12	-1.62	0.0527	855	0.977	0.947	17201	0.994	-0.652	1.28
CHORDC1	-9.96	12	-1.62	0.053	862	0.977	0.947	17194	0.994	-1.057	1.28
CCDC84	-9.96	12	-1.62	0.0529	859	0.977	0.947	17197	0.994	-0.478	1.28
CDK2	-9.95	12	-1.62	0.053	863	0.977	0.947	17193	0.994	-0.6	1.28
SLC25A5	-8.61	9	-1.61	0.0533	867	0.977	0.947	17189	0.994	-0.661	1.27
OPRM1	-9.96	12	-1.62	0.0529	858	0.977	0.947	17198	0.994	-0.866	1.28
VAMP5	-9.95	12	-1.62	0.0531	866	0.977	0.947	17190	0.994	-0.634	1.27
WWP2	-9.96	12	-1.62	0.0528	857	0.977	0.947	17199	0.994	-0.702	1.28
NDUFA8	-9.97	12	-1.62	0.0526	854	0.977	0.947	17202	0.994	-0.786	1.28
NELFB	-9.94	12	-1.61	0.0534	869	0.977	0.947	17187	0.994	-1.333	1.27
KLHL17	-9.95	12	-1.62	0.0531	864	0.977	0.947	17192	0.994	-0.846	1.27
MMS22L	-9.94	12	-1.61	0.0535	871	0.977	0.947	17185	0.994	0.098	1.27
TBP	-9.93	12	-1.61	0.0537	875	0.977	0.946	17181	0.994	-0.95	1.27
TULP4	-9.93	12	-1.61	0.0536	872	0.977	0.946	17184	0.994	-0.97	1.27
YIPF6	-9.94	12	-1.61	0.0533	868	0.977	0.947	17188	0.994	-0.456	1.27
SLC35E1	-9.93	12	-1.61	0.0537	874	0.977	0.946	17182	0.994	-0.588	1.27
BCMO1	-9.92	12	-1.61	0.0538	878	0.977	0.946	17178	0.994	-1.011	1.27
RTBDN	-9.92	12	-1.61	0.0539	879	0.977	0.946	17177	0.994	-0.7	1.27
SRSF5	-9.92	12	-1.61	0.0538	876	0.977	0.946	17180	0.994	-0.457	1.27
SH3GLB1	-9.94	12	-1.61	0.0534	870	0.977	0.947	17186	0.994	-0.655	1.27
DPYD	-9.9	12	-1.6	0.0543	885	0.977	0.946	17171	0.994	-0.61	1.27
CFDP1	-9.95	12	-1.62	0.0531	865	0.977	0.947	17191	0.994	-0.645	1.27
ALDH18A1	-9.92	12	-1.61	0.054	881	0.977	0.946	17175	0.994	-0.59	1.27
ASB17	-9.92	12	-1.61	0.0538	877	0.977	0.946	17179	0.994	-0.68	1.27
KCNK15	-9.9	12	-1.6	0.0545	891	0.977	0.946	17165	0.994	-0.879	1.26
NLRC5	-9.93	12	-1.61	0.0536	873	0.977	0.946	17183	0.994	-0.78	1.27
TBC1D20	-9.91	12	-1.61	0.0542	884	0.977	0.946	17172	0.994	-0.433	1.27
C16orf62	-9.91	12	-1.61	0.0542	883	0.977	0.946	17173	0.994	-0.594	1.27
SEC14L6	-9.9	12	-1.6	0.0544	887	0.977	0.946	17169	0.994	-0.258	1.26
SMNDC1	-9.9	12	-1.6	0.0545	890	0.977	0.946	17166	0.994	-0.747	1.26
PAPD7	-9.92	12	-1.61	0.054	880	0.977	0.946	17176	0.994	-0.777	1.27
TRIAP1	-9.89	12	-1.6	0.0547	893	0.977	0.945	17163	0.994	-0.838	1.26
GINS2	-9.88	12	-1.6	0.0548	894	0.977	0.945	17162	0.994	-1.136	1.26
LLGL1	-9.88	12	-1.6	0.0548	896	0.977	0.945	17160	0.994	-0.648	1.26
RUVBL1	-9.03	10	-1.6	0.0544	889	0.977	0.946	17167	0.994	-1.699	1.26
UBE2V2	-9.89	12	-1.6	0.0545	892	0.977	0.945	17164	0.994	-0.344	1.26
RBM14	-9.88	12	-1.6	0.0548	895	0.977	0.945	17161	0.994	-0.597	1.26
C1orf200	-9.88	12	-1.6	0.055	900	0.977	0.945	17156	0.994	-0.697	1.26
NCBP1	-9.91	12	-1.61	0.0542	882	0.977	0.946	17174	0.994	-1.104	1.27
PSMA3	-9.46	11	-1.6	0.0548	898	0.977	0.945	17158	0.994	-1.897	1.26
WDR5	-9.87	12	-1.6	0.055	901	0.977	0.945	17155	0.994	-1.194	1.26
GDAP1L1	-9.87	12	-1.6	0.055	903	0.977	0.945	17153	0.994	-0.832	1.26
VAPA	-8.57	9	-1.6	0.0543	886	0.977	0.946	17170	0.994	-0.594	1.27
THRSP	-9.86	12	-1.59	0.0554	911	0.977	0.945	17145	0.994	-0.534	1.26
ZNF281	-9.87	12	-1.6	0.055	902	0.977	0.945	17154	0.994	-0.424	1.26
SAMD9	-9.85	12	-1.59	0.0557	916	0.977	0.944	17140	0.994	-0.592	1.25
ODF3B	-9.87	12	-1.6	0.0551	904	0.977	0.945	17152	0.994	-0.59	1.26
PDGFRB	-9.85	12	-1.59	0.0555	913	0.977	0.944	17143	0.994	-0.474	1.26
JRKL	-9.86	12	-1.59	0.0554	910	0.977	0.945	17146	0.994	-0.738	1.26
ASB9	-9.86	12	-1.6	0.0553	908	0.977	0.945	17148	0.994	-0.719	1.26
RALBP1	-9.88	12	-1.6	0.0548	897	0.977	0.945	17159	0.994	-0.464	1.26
SMYD2	-9.87	12	-1.6	0.0552	906	0.977	0.945	17150	0.994	-0.588	1.26
DKC1	-9.86	12	-1.6	0.0553	909	0.977	0.945	17147	0.994	-1.328	1.26
AP1B1	-8.55	9	-1.6	0.0552	905	0.977	0.945	17151	0.994	-0.539	1.26
GPR61	-9.88	12	-1.6	0.0549	899	0.977	0.945	17157	0.994	-0.572	1.26
ZNF446	-9.84	12	-1.59	0.0559	919	0.977	0.944	17137	0.994	-0.59	1.25
NSRP1	-9.86	12	-1.6	0.0553	907	0.977	0.945	17149	0.994	-0.942	1.26
TCF7L1	-9.84	12	-1.59	0.056	922	0.977	0.944	17134	0.994	-0.529	1.25
PRPF4	-9.84	12	-1.59	0.056	923	0.977	0.944	17133	0.994	-0.747	1.25
MYOM2	-9.9	12	-1.6	0.0544	888	0.977	0.946	17168	0.994	-0.808	1.26
VHLL	-9.83	12	-1.59	0.0561	926	0.977	0.944	17130	0.994	-0.537	1.25
FAM149B1	-9.82	12	-1.59	0.0563	930	0.977	0.944	17126	0.994	-0.682	1.25
KLC3	-9.85	12	-1.59	0.0557	915	0.977	0.944	17141	0.994	-0.366	1.25
SDE2	-9.85	12	-1.59	0.0556	914	0.977	0.944	17142	0.994	-1.611	1.25
PEAR1	-9.83	12	-1.59	0.0562	929	0.977	0.944	17127	0.994	-0.389	1.25
ZNF583	-9.86	12	-1.59	0.0555	912	0.977	0.945	17144	0.994	-0.721	1.26
NTNG1	-8.98	10	-1.59	0.0559	921	0.977	0.944	17135	0.994	-0.492	1.25
UBR3	-9.84	12	-1.59	0.0559	920	0.977	0.944	17136	0.994	-0.31	1.25
COL8A2	-9.84	12	-1.59	0.056	924	0.977	0.944	17132	0.994	-0.892	1.25
VSTM5	-9.83	12	-1.59	0.0561	927	0.977	0.944	17129	0.994	-0.617	1.25
RAB14	-9.85	12	-1.59	0.0557	917	0.977	0.944	17139	0.994	-0.648	1.25
EXOSC2	-9.84	12	-1.59	0.0558	918	0.977	0.944	17138	0.994	-1.071	1.25
TECR	-9.83	12	-1.59	0.0561	925	0.977	0.944	17131	0.994	-0.821	1.25
FATE1	-9.83	12	-1.59	0.0561	928	0.977	0.944	17128	0.994	-0.469	1.25
HIST1H2AK	-9.8	12	-1.58	0.057	934	0.977	0.943	17122	0.994	-0.617	1.24
ZNF185	-9.82	12	-1.58	0.0565	931	0.977	0.943	17125	0.994	-0.405	1.25
NR2C2AP	-8.49	9	-1.58	0.057	932	0.977	0.943	17124	0.994	-0.619	1.24
ABR	-9.79	12	-1.58	0.0573	936	0.977	0.943	17120	0.994	-0.574	1.24
COG2	-9.78	12	-1.58	0.0574	937	0.977	0.943	17119	0.994	-0.627	1.24
CD93	-9.78	12	-1.58	0.0574	938	0.977	0.943	17118	0.994	-0.747	1.24
SEPSECS	-9.8	12	-1.58	0.057	933	0.977	0.943	17123	0.994	-0.902	1.24
B4GALT7	-9.75	12	-1.57	0.0582	950	0.977	0.942	17106	0.994	-1.138	1.24
RNASET2	-9.76	12	-1.57	0.0579	946	0.977	0.942	17110	0.994	-0.263	1.24
LONP1	-9.76	12	-1.57	0.0579	945	0.977	0.942	17111	0.994	-1.1	1.24
CCDC81	-9.76	12	-1.57	0.058	947	0.977	0.942	17109	0.994	-0.42	1.24
MLXIPL	-9.77	12	-1.57	0.0577	943	0.977	0.942	17113	0.994	-0.666	1.24
MSN	-9.76	12	-1.57	0.0581	949	0.977	0.942	17107	0.994	-0.794	1.24
GABBR1	-9.78	12	-1.58	0.0575	941	0.977	0.942	17115	0.994	-0.686	1.24
U2AF1	-9.77	12	-1.57	0.0577	944	0.977	0.942	17112	0.994	-1.019	1.24
DNLZ	-9.79	12	-1.58	0.0572	935	0.977	0.943	17121	0.994	-0.504	1.24
KLF10	-9.78	12	-1.58	0.0574	939	0.977	0.943	17117	0.994	-0.6	1.24
PCNXL3	-9.76	12	-1.57	0.058	948	0.977	0.942	17108	0.994	-0.7	1.24
RABGGTB	-9.75	12	-1.57	0.0582	951	0.977	0.942	17105	0.994	-1.926	1.24
MBTPS1	-9.78	12	-1.58	0.0575	940	0.977	0.942	17116	0.994	-0.677	1.24
TRIM46	-9.74	12	-1.57	0.0586	957	0.977	0.941	17099	0.994	-0.625	1.23
IFT20	-9.74	12	-1.57	0.0585	953	0.977	0.942	17103	0.994	-0.581	1.23
GRN	-9.77	12	-1.57	0.0577	942	0.977	0.942	17114	0.994	-0.696	1.24
PDE3A	-9.73	12	-1.57	0.0587	959	0.977	0.941	17097	0.994	-1.022	1.23
PSAP	-9.74	12	-1.57	0.0586	958	0.977	0.941	17098	0.994	-0.599	1.23
ARMCX3	-9.74	12	-1.57	0.0585	954	0.977	0.942	17102	0.994	-0.748	1.23
PIH1D2	-9.72	12	-1.56	0.0589	961	0.977	0.941	17095	0.994	-0.988	1.23
GAK	-9.73	12	-1.56	0.0589	960	0.977	0.941	17096	0.994	-0.419	1.23
ZNF823	-9.75	12	-1.57	0.0583	952	0.977	0.942	17104	0.994	-0.636	1.23
SPTY2D1	-9.74	12	-1.57	0.0585	955	0.977	0.942	17101	0.994	-0.721	1.23
PSMB4	-9.74	12	-1.57	0.0585	956	0.977	0.942	17100	0.994	-1.52	1.23
HLF	-9.72	12	-1.56	0.059	963	0.977	0.941	17093	0.994	-0.798	1.23
PTP4A2	-9.72	12	-1.56	0.059	962	0.977	0.941	17094	0.994	-0.436	1.23
TRAIP	-9.72	12	-1.56	0.0592	966	0.977	0.941	17090	0.994	-0.75	1.23
MED15	-9.72	12	-1.56	0.0592	965	0.977	0.941	17091	0.994	-0.925	1.23
HNMT	-9.7	12	-1.56	0.0596	968	0.977	0.94	17088	0.994	-0.605	1.22
TCP11L1	-9.68	12	-1.55	0.0601	973	0.977	0.94	17083	0.993	-0.579	1.22
CPSF3	-9.7	12	-1.56	0.0597	970	0.977	0.94	17086	0.994	-0.807	1.22
MSL3	-9.72	12	-1.56	0.0591	964	0.977	0.941	17092	0.994	-0.484	1.23
MORF4L2	-9.71	12	-1.56	0.0592	967	0.977	0.941	17089	0.994	-0.702	1.23
CCDC22	-9.7	12	-1.56	0.0597	971	0.977	0.94	17085	0.994	-0.668	1.22
CMTM4	-9.67	12	-1.55	0.0603	975	0.977	0.94	17081	0.993	-0.581	1.22
OR2T11	-9.67	12	-1.55	0.0605	977	0.977	0.939	17079	0.993	-0.633	1.22
GRK7	-9.7	12	-1.56	0.0596	969	0.977	0.94	17087	0.994	-0.533	1.22
FOXC2	-9.65	12	-1.55	0.0608	983	0.977	0.939	17073	0.993	-1.072	1.22
TNRC18	-9.65	12	-1.55	0.0608	982	0.977	0.939	17074	0.993	-0.505	1.22
PLEKHG5	-9.66	12	-1.55	0.0606	980	0.977	0.939	17076	0.993	-0.592	1.22
USB1	-9.62	12	-1.54	0.0617	995	0.977	0.938	17061	0.993	-0.551	1.21
SOX18	-9.69	12	-1.56	0.0598	972	0.977	0.94	17084	0.994	-0.548	1.22
NUP85	-9.65	12	-1.55	0.0609	984	0.977	0.939	17072	0.993	-0.82	1.22
SREBF2	-9.64	12	-1.54	0.0612	988	0.977	0.939	17068	0.993	-0.467	1.21
CEACAM6	-9.68	12	-1.55	0.0602	974	0.977	0.94	17082	0.993	-0.65	1.22
GLUD1	-9.63	12	-1.54	0.0614	990	0.977	0.939	17066	0.993	-0.574	1.21
LHPP	-9.67	12	-1.55	0.0604	976	0.977	0.94	17080	0.993	-0.654	1.22
DEPDC7	-9.63	12	-1.54	0.0614	989	0.977	0.939	17067	0.993	-0.551	1.21
PIFO	-9.63	12	-1.54	0.0615	991	0.977	0.939	17065	0.993	-0.471	1.21
SLAIN1	-9.64	12	-1.55	0.0612	986	0.977	0.939	17070	0.993	-0.741	1.21
KCTD2	-9.67	12	-1.55	0.0605	978	0.977	0.939	17078	0.993	-0.413	1.22
DVL1	-9.63	12	-1.54	0.0616	993	0.977	0.938	17063	0.993	-0.599	1.21
DXO	-9.62	12	-1.54	0.0617	994	0.977	0.938	17062	0.993	-0.554	1.21
SEMA6A	-9.62	12	-1.54	0.0619	996	0.977	0.938	17060	0.993	-0.356	1.21
SMIM7	-9.66	12	-1.55	0.0605	979	0.977	0.939	17077	0.993	-0.271	1.22
ACR	-9.64	12	-1.54	0.0612	987	0.977	0.939	17069	0.993	-0.705	1.21
PTPRC	-9.63	12	-1.54	0.0616	992	0.977	0.938	17064	0.993	-0.623	1.21
PABPC4L	-9.66	12	-1.55	0.0606	981	0.977	0.939	17075	0.993	-0.605	1.22
PAEP	-9.6	12	-1.54	0.0624	1004	0.977	0.938	17052	0.993	-0.584	1.2
BRD4	-9.65	12	-1.55	0.0611	985	0.977	0.939	17071	0.993	-0.673	1.21
APBA2	-9.61	12	-1.54	0.062	998	0.977	0.938	17058	0.993	-0.532	1.21
EDA	-9.62	12	-1.54	0.0619	997	0.977	0.938	17059	0.993	-1.22	1.21
UTP23	-9.61	12	-1.54	0.0621	1002	0.977	0.938	17054	0.993	-0.723	1.21
ADPRM	-9.61	12	-1.54	0.0621	1000	0.977	0.938	17056	0.993	-0.483	1.21
IL1F10	-9.59	12	-1.53	0.0627	1005	0.977	0.937	17051	0.993	-0.499	1.2
SMC3	-9.61	12	-1.54	0.0621	1001	0.977	0.938	17055	0.993	-1.452	1.21
AKTIP	-9.56	12	-1.53	0.0634	1017	0.977	0.937	17039	0.992	-0.479	1.2
LHFPL3	-9.6	12	-1.54	0.0622	1003	0.977	0.938	17053	0.993	-0.65	1.21
JAM3	-9.59	12	-1.53	0.0627	1006	0.977	0.937	17050	0.993	-0.544	1.2
TIMM50	-9.58	12	-1.53	0.0628	1008	0.977	0.937	17048	0.993	-0.879	1.2
ENY2	-9.58	12	-1.53	0.0629	1009	0.977	0.937	17047	0.992	-0.662	1.2
C1orf109	-9.57	12	-1.53	0.0631	1013	0.977	0.937	17043	0.992	-0.976	1.2
PPP1R1A	-9.58	12	-1.53	0.063	1011	0.977	0.937	17045	0.992	-0.59	1.2
MANF	-9.57	12	-1.53	0.0633	1016	0.977	0.937	17040	0.992	-0.37	1.2
RBM47	-9.53	12	-1.52	0.0642	1027	0.977	0.936	17029	0.992	-0.533	1.19
FXYD4	-9.58	12	-1.53	0.0628	1007	0.977	0.937	17049	0.993	-0.641	1.2
SLC45A4	-9.56	12	-1.53	0.0635	1018	0.977	0.937	17038	0.992	-0.434	1.2
RNF222	-9.58	12	-1.53	0.063	1010	0.977	0.937	17046	0.992	-0.435	1.2
C6orf48	-9.56	12	-1.53	0.0635	1019	0.977	0.937	17037	0.992	-0.739	1.2
RPL18	-9.57	12	-1.53	0.0633	1014	0.977	0.937	17042	0.992	-0.731	1.2
MROH9	-9.56	12	-1.53	0.0636	1023	0.977	0.936	17033	0.992	-0.511	1.2
FANCE	-9.53	12	-1.52	0.0642	1028	0.977	0.936	17028	0.992	-0.562	1.19
C19orf47	-9.57	12	-1.53	0.0631	1012	0.977	0.937	17044	0.992	-0.555	1.2
NAIP	-9.54	12	-1.52	0.0639	1025	0.977	0.936	17031	0.992	-0.26	1.19
KIAA1875	-9.57	12	-1.53	0.0633	1015	0.977	0.937	17041	0.992	-0.931	1.2
SSX1	-6.8	6	-1.54	0.062	999	0.977	0.938	17057	0.993	-2.126	1.21
ITGAV	-9.54	12	-1.52	0.0641	1026	0.977	0.936	17030	0.992	-0.99	1.19
FBXL19	-9.51	12	-1.51	0.0649	1036	0.977	0.935	17020	0.992	-0.989	1.19
LRRC73	-9.56	12	-1.53	0.0636	1020	0.977	0.936	17036	0.992	-0.708	1.2
PRPF8	-9.56	12	-1.53	0.0636	1021	0.977	0.936	17035	0.992	-1.183	1.2
VPS13D	-9.53	12	-1.52	0.0644	1032	0.977	0.936	17024	0.992	-0.675	1.19
EIF5A	-6.72	6	-1.51	0.0649	1037	0.977	0.935	17019	0.992	-1.336	1.19
LZTS2	-9.56	12	-1.53	0.0636	1022	0.977	0.936	17034	0.992	-0.603	1.2
FOXH1	-9.49	12	-1.51	0.0655	1053	0.977	0.934	17003	0.992	-0.874	1.18
ACCS	-9.53	12	-1.52	0.0644	1031	0.977	0.936	17025	0.992	-0.481	1.19
ANKRD45	-9.51	12	-1.51	0.065	1039	0.977	0.935	17017	0.992	-0.618	1.19
RNF5	-9.55	12	-1.52	0.0638	1024	0.977	0.936	17032	0.992	-0.692	1.2
TBL2	-9.5	12	-1.51	0.0652	1044	0.977	0.935	17012	0.992	-0.377	1.19
ZCWPW1	-9.52	12	-1.52	0.0646	1033	0.977	0.935	17023	0.992	-0.681	1.19
GLG1	-9.5	12	-1.51	0.0653	1046	0.977	0.935	17010	0.992	-0.525	1.19
CD4	-9.53	12	-1.52	0.0643	1029	0.977	0.936	17027	0.992	-0.562	1.19
EDC3	-9.51	12	-1.51	0.065	1038	0.977	0.935	17018	0.992	-0.699	1.19
HSD11B1	-9.48	12	-1.51	0.0657	1054	0.977	0.934	17002	0.992	-0.708	1.18
FBXO46	-9.53	12	-1.52	0.0644	1030	0.977	0.936	17026	0.992	-0.7	1.19
PIGM	-9.5	12	-1.51	0.0652	1041	0.977	0.935	17015	0.992	-0.538	1.19
IRF2BP1	-9.5	12	-1.51	0.0653	1045	0.977	0.935	17011	0.992	-0.413	1.19
PSMA1	-9.5	12	-1.51	0.0652	1043	0.977	0.935	17013	0.992	-1.174	1.19
IL1RAPL2	-9.49	12	-1.51	0.0654	1051	0.977	0.935	17005	0.992	-0.714	1.18
TUT1	-9.5	12	-1.51	0.0653	1048	0.977	0.935	17008	0.992	-1.134	1.19
PDPK1	-9.47	12	-1.51	0.066	1058	0.977	0.934	16998	0.992	-0.683	1.18
LZIC	-9.49	12	-1.51	0.0654	1052	0.977	0.935	17004	0.992	-0.454	1.18
CXXC1	-9.5	12	-1.51	0.0653	1049	0.977	0.935	17007	0.992	-0.851	1.19
LRRC37B	-9.52	12	-1.52	0.0646	1034	0.977	0.935	17022	0.992	-0.613	1.19
C17orf72	-9.5	12	-1.51	0.0651	1040	0.977	0.935	17016	0.992	-0.9	1.19
METAP2	-9.49	12	-1.51	0.0654	1050	0.977	0.935	17006	0.992	-0.595	1.18
LPHN1	-9.52	12	-1.52	0.0647	1035	0.977	0.935	17021	0.992	-0.386	1.19
HMGB4	-9.46	12	-1.5	0.0663	1060	0.977	0.934	16996	0.992	-0.735	1.18
MCCC2	-9.45	12	-1.5	0.0665	1061	0.977	0.933	16995	0.992	-0.469	1.18
OR5B2	-9.47	12	-1.51	0.0659	1056	0.977	0.934	17000	0.992	-0.409	1.18
LRFN4	-9.5	12	-1.51	0.0653	1047	0.977	0.935	17009	0.992	-0.525	1.19
NENF	-9.44	12	-1.5	0.0668	1071	0.977	0.933	16985	0.992	-0.643	1.18
HACE1	-9.45	12	-1.5	0.0665	1062	0.977	0.933	16994	0.992	-0.674	1.18
HOXA4	-9.5	12	-1.51	0.0652	1042	0.977	0.935	17014	0.992	-0.667	1.19
TTC14	-9.45	12	-1.5	0.0668	1069	0.977	0.933	16987	0.992	-0.583	1.18
SUPT3H	-9.45	12	-1.5	0.0667	1068	0.977	0.933	16988	0.992	-0.603	1.18
TELO2	-9.45	12	-1.5	0.0667	1067	0.977	0.933	16989	0.992	-0.29	1.18
RPA1	-9.45	12	-1.5	0.0666	1065	0.977	0.933	16991	0.992	-2.604	1.18
TCN2	-9.43	12	-1.5	0.0672	1075	0.977	0.933	16981	0.992	-0.715	1.17
GOLT1A	-9.45	12	-1.5	0.0667	1066	0.977	0.933	16990	0.992	-1.165	1.18
CSTF1	-9.44	12	-1.5	0.067	1072	0.977	0.933	16984	0.992	-0.853	1.17
FAM127A	-9.47	12	-1.51	0.066	1057	0.977	0.934	16999	0.992	-0.757	1.18
AC016722.1	-9.45	12	-1.5	0.0666	1064	0.977	0.933	16992	0.992	-0.516	1.18
PRUNE	-9.48	12	-1.51	0.0659	1055	0.977	0.934	17001	0.992	-0.56	1.18
NUP133	-9.42	12	-1.49	0.0676	1080	0.977	0.932	16976	0.992	-1.541	1.17
SLMAP	-9.45	12	-1.5	0.0665	1063	0.977	0.933	16993	0.992	-0.509	1.18
GAPT	-9.43	12	-1.5	0.0672	1076	0.977	0.933	16980	0.992	-0.889	1.17
STARD6	-9.46	12	-1.5	0.0662	1059	0.977	0.934	16997	0.992	-0.654	1.18
EGR4	-9.43	12	-1.5	0.0672	1074	0.977	0.933	16982	0.992	-0.864	1.17
PKDREJ	-9.42	12	-1.49	0.0675	1078	0.977	0.933	16978	0.992	-0.511	1.17
ARPC2	-9.45	12	-1.5	0.0668	1070	0.977	0.933	16986	0.992	-0.852	1.18
EIF5	-9.42	12	-1.49	0.0675	1077	0.977	0.933	16979	0.992	-1.238	1.17
NSMCE2	-9.44	12	-1.5	0.0671	1073	0.977	0.933	16983	0.992	-0.99	1.17
NFYC	-9.4	12	-1.49	0.0682	1087	0.977	0.932	16969	0.991	-0.436	1.17
ZSCAN22	-9.41	12	-1.49	0.0677	1081	0.977	0.932	16975	0.992	-0.553	1.17
INPPL1	-9.42	12	-1.49	0.0675	1079	0.977	0.932	16977	0.992	-0.366	1.17
TRA2A	-9.37	12	-1.48	0.069	1096	0.977	0.931	16960	0.991	-0.982	1.16
CSNK2B	-9.41	12	-1.49	0.0678	1082	0.977	0.932	16974	0.992	-1.401	1.17
GPANK1	-9.4	12	-1.49	0.0682	1085	0.977	0.932	16971	0.991	-0.513	1.17
NDE1	-9.4	12	-1.49	0.068	1083	0.977	0.932	16973	0.991	-0.951	1.17
PPIL4	-9.39	12	-1.49	0.0685	1090	0.977	0.932	16966	0.991	-0.414	1.16
U2AF2	-9.4	12	-1.49	0.0682	1086	0.977	0.932	16970	0.991	-0.994	1.17
TMEM199	-9.4	12	-1.49	0.0681	1084	0.977	0.932	16972	0.991	-0.85	1.17
HLA-DOA	-9.38	12	-1.48	0.0688	1093	0.977	0.931	16963	0.991	-0.517	1.16
THOC5	-9.39	12	-1.49	0.0683	1088	0.977	0.932	16968	0.991	-0.828	1.17
CUL1	-9.38	12	-1.49	0.0686	1091	0.977	0.931	16965	0.991	-0.84	1.16
RNMT	-9.38	12	-1.48	0.0688	1094	0.977	0.931	16962	0.991	-0.922	1.16
ZNF407	-9.39	12	-1.49	0.0684	1089	0.977	0.932	16967	0.991	-0.999	1.16
MED11	-8.98	11	-1.48	0.0688	1095	0.977	0.931	16961	0.991	-1.438	1.16
STK32B	-9.35	12	-1.48	0.0698	1108	0.977	0.93	16948	0.991	-0.712	1.16
HSP90B1	-9.35	12	-1.48	0.0695	1104	0.977	0.93	16952	0.991	-0.822	1.16
SAMD8	-9.37	12	-1.48	0.0691	1100	0.977	0.931	16956	0.991	-0.647	1.16
FBXO45	-9.36	12	-1.48	0.0693	1101	0.977	0.931	16955	0.991	-0.658	1.16
JAKMIP1	-9.36	12	-1.48	0.0694	1102	0.977	0.931	16954	0.991	-0.606	1.16
OR14K1	-9.33	12	-1.47	0.0703	1113	0.977	0.93	16943	0.991	-0.708	1.15
FAM180B	-9.38	12	-1.49	0.0687	1092	0.977	0.931	16964	0.991	-0.798	1.16
OR7A5	-9.34	12	-1.48	0.0698	1109	0.977	0.93	16947	0.991	-0.368	1.16
WDR82	-9.36	12	-1.48	0.0695	1103	0.977	0.931	16953	0.991	-1.224	1.16
NCF1	-9.37	12	-1.48	0.069	1097	0.977	0.931	16959	0.991	-0.687	1.16
EFNA2	-9.37	12	-1.48	0.0691	1098	0.977	0.931	16958	0.991	-1.234	1.16
TOMM40	-9.35	12	-1.48	0.0696	1106	0.977	0.93	16950	0.991	-1.15	1.16
RADIL	-9.37	12	-1.48	0.0691	1099	0.977	0.931	16957	0.991	-0.523	1.16
PUS7	-9.35	12	-1.48	0.0697	1107	0.977	0.93	16949	0.991	-0.764	1.16
IGFL4	-9.31	12	-1.47	0.0709	1121	0.977	0.929	16935	0.991	-0.345	1.15
NNT	-9.33	12	-1.47	0.0704	1115	0.977	0.93	16941	0.991	-0.473	1.15
LSM10	-9.3	12	-1.47	0.0711	1124	0.977	0.929	16932	0.991	-0.539	1.15
MLLT4	-9.32	12	-1.47	0.0706	1116	0.977	0.929	16940	0.991	-0.68	1.15
HCRTR2	-9.31	12	-1.47	0.0709	1122	0.977	0.929	16934	0.991	-0.67	1.15
MRPL18	-9.33	12	-1.47	0.0701	1112	0.977	0.93	16944	0.991	-0.365	1.15
DPYSL2	-9.33	12	-1.47	0.0703	1114	0.977	0.93	16942	0.991	-0.751	1.15
ALKBH3	-9.34	12	-1.48	0.0699	1110	0.977	0.93	16946	0.991	-0.594	1.16
RWDD3	-9.32	12	-1.47	0.0706	1118	0.977	0.929	16938	0.991	-0.678	1.15
CDH3	-9.3	12	-1.47	0.0713	1127	0.977	0.929	16929	0.99	-0.474	1.15
RAPGEF2	-9.34	12	-1.48	0.07	1111	0.977	0.93	16945	0.991	-0.638	1.15
TTC32	-9.3	12	-1.47	0.0713	1128	0.977	0.929	16928	0.99	-0.89	1.15
SMAD4	-9.32	12	-1.47	0.0706	1117	0.977	0.929	16939	0.991	-0.3	1.15
MTIF2	-9.29	12	-1.46	0.0715	1132	0.977	0.929	16924	0.99	-0.466	1.15
AKR1D1	-9.31	12	-1.47	0.0708	1119	0.977	0.929	16937	0.991	-0.842	1.15
MND1	-9.29	12	-1.46	0.0716	1136	0.977	0.928	16920	0.99	-0.597	1.15
B3GNT9	-9.28	12	-1.46	0.072	1140	0.977	0.928	16916	0.99	-0.891	1.14
NDUFA1	-9.27	12	-1.46	0.072	1141	0.977	0.928	16915	0.99	-0.561	1.14
EIF2AK2	-9.25	12	-1.46	0.0726	1155	0.977	0.927	16901	0.99	-0.399	1.14
UBALD2	-9.3	12	-1.47	0.0713	1126	0.977	0.929	16930	0.99	-0.686	1.15
DFFB	-9.29	12	-1.46	0.0715	1133	0.977	0.929	16923	0.99	-0.712	1.15
POC5	-9.26	12	-1.46	0.0724	1150	0.977	0.928	16906	0.99	-0.505	1.14
NT5C1A	-9.31	12	-1.47	0.071	1123	0.977	0.929	16933	0.991	-0.754	1.15
ZFP30	-9.3	12	-1.47	0.0711	1125	0.977	0.929	16931	0.991	-0.436	1.15
COQ9	-9.27	12	-1.46	0.0722	1145	0.977	0.928	16911	0.99	-0.255	1.14
PPM1M	-9.31	12	-1.47	0.0708	1120	0.977	0.929	16936	0.991	-1.091	1.15
CNTNAP4	-9.29	12	-1.46	0.0715	1135	0.977	0.928	16921	0.99	-0.661	1.15
VIP	-9.26	12	-1.46	0.0723	1147	0.977	0.928	16909	0.99	-0.54	1.14
ACP2	-9.29	12	-1.47	0.0714	1130	0.977	0.929	16926	0.99	-0.454	1.15
HES6	-9.29	12	-1.47	0.0714	1131	0.977	0.929	16925	0.99	-0.816	1.15
PRDM11	-9.27	12	-1.46	0.0722	1143	0.977	0.928	16913	0.99	-0.554	1.14
NLRX1	-9.27	12	-1.46	0.072	1142	0.977	0.928	16914	0.99	-0.616	1.14
ZBED2	-9.28	12	-1.46	0.0718	1137	0.977	0.928	16919	0.99	-0.972	1.14
BCKDHB	-9.26	12	-1.46	0.0724	1152	0.977	0.928	16904	0.99	-0.473	1.14
CHRNA7	-9.26	12	-1.46	0.0723	1148	0.977	0.928	16908	0.99	-0.738	1.14
METTL1	-9.26	12	-1.46	0.0724	1151	0.977	0.928	16905	0.99	-0.354	1.14
EXOC7	-9.25	12	-1.46	0.0726	1157	0.977	0.927	16899	0.99	-1.236	1.14
C3orf49	-9.28	12	-1.46	0.0719	1138	0.977	0.928	16918	0.99	-0.528	1.14
ALKBH6	-9.28	12	-1.46	0.072	1139	0.977	0.928	16917	0.99	-0.546	1.14
SNX32	-9.29	12	-1.47	0.0714	1129	0.977	0.929	16927	0.99	-0.473	1.15
FLRT1	-9.25	12	-1.46	0.0728	1159	0.977	0.927	16897	0.99	-0.886	1.14
MARCH1	-9.27	12	-1.46	0.0722	1144	0.977	0.928	16912	0.99	-0.183	1.14
MRPL11	-9.24	12	-1.45	0.0731	1162	0.977	0.927	16894	0.99	-0.696	1.14
FNTB	-9.25	12	-1.46	0.0727	1158	0.977	0.927	16898	0.99	-0.655	1.14
OR5AN1	-9.24	12	-1.45	0.073	1160	0.977	0.927	16896	0.99	-0.65	1.14
PSRC1	-9.29	12	-1.46	0.0715	1134	0.977	0.928	16922	0.99	-0.933	1.15
PHLDB2	-9.27	12	-1.46	0.0722	1146	0.977	0.928	16910	0.99	-0.64	1.14
COPE	-9.26	12	-1.46	0.0725	1154	0.977	0.927	16902	0.99	-0.919	1.14
IGF1R	-9.26	12	-1.46	0.0724	1149	0.977	0.928	16907	0.99	-0.619	1.14
MAP2K7	-9.25	12	-1.46	0.0726	1156	0.977	0.927	16900	0.99	-0.867	1.14
CPSF4	-9.23	12	-1.45	0.0734	1165	0.977	0.927	16891	0.99	-0.185	1.13
DENR	-9.26	12	-1.46	0.0724	1153	0.977	0.928	16903	0.99	-0.595	1.14
EIF2B5	-9.23	12	-1.45	0.0735	1170	0.977	0.926	16886	0.99	-1.015	1.13
PRKCE	-9.23	12	-1.45	0.0735	1167	0.977	0.927	16889	0.99	-0.685	1.13
AKR1B1	-9.24	12	-1.45	0.073	1161	0.977	0.927	16895	0.99	-0.42	1.14
RHAG	-9.22	12	-1.45	0.0736	1171	0.977	0.926	16885	0.99	-0.695	1.13
CNGA2	-9.22	12	-1.45	0.0738	1173	0.977	0.926	16883	0.99	-0.857	1.13
F5	-9.23	12	-1.45	0.0734	1164	0.977	0.927	16892	0.99	-0.363	1.13
PIGB	-9.23	12	-1.45	0.0733	1163	0.977	0.927	16893	0.99	-0.631	1.13
OR4D1	-9.19	12	-1.44	0.0748	1189	0.977	0.925	16867	0.99	-1.197	1.13
LRRC15	-9.21	12	-1.45	0.0739	1180	0.977	0.926	16876	0.99	-0.687	1.13
FAM57A	-9.22	12	-1.45	0.0738	1175	0.977	0.926	16881	0.99	-0.855	1.13
TCP11	-7.99	9	-1.45	0.0737	1172	0.977	0.926	16884	0.99	-0.192	1.13
ZMIZ1	-9.22	12	-1.45	0.0738	1174	0.977	0.926	16882	0.99	-0.586	1.13
RPS25	-9.22	12	-1.45	0.0739	1177	0.977	0.926	16879	0.99	-1.036	1.13
GDPD5	-9.21	12	-1.45	0.0741	1183	0.977	0.926	16873	0.99	-0.62	1.13
PSAPL1	-9.21	12	-1.45	0.074	1182	0.977	0.926	16874	0.99	-0.602	1.13
TRIM37	-9.21	12	-1.45	0.0739	1179	0.977	0.926	16877	0.99	-0.798	1.13
MLLT1	-9.23	12	-1.45	0.0735	1168	0.977	0.926	16888	0.99	-0.337	1.13
PAX6	-9.23	12	-1.45	0.0734	1166	0.977	0.927	16890	0.99	-0.877	1.13
TMEM183A	-9.19	12	-1.44	0.0745	1186	0.977	0.925	16870	0.99	-0.426	1.13
DNAH9	-9.23	12	-1.45	0.0735	1169	0.977	0.926	16887	0.99	-0.869	1.13
HEY2	-9.18	12	-1.44	0.0748	1190	0.977	0.925	16866	0.99	-0.959	1.13
POLK	-9.22	12	-1.45	0.0738	1176	0.977	0.926	16880	0.99	-0.702	1.13
LILRA4	-9.21	12	-1.45	0.0739	1181	0.977	0.926	16875	0.99	-0.453	1.13
SFI1	-9.21	12	-1.45	0.0739	1178	0.977	0.926	16878	0.99	-0.377	1.13
NT5M	-9.2	12	-1.44	0.0743	1184	0.977	0.926	16872	0.99	-0.509	1.13
RAB11FIP4	-9.18	12	-1.44	0.0749	1192	0.977	0.925	16864	0.99	-0.329	1.13
VMP1	-9.2	12	-1.44	0.0743	1185	0.977	0.926	16871	0.99	-1.021	1.13
POLRMT	-9.18	12	-1.44	0.0749	1191	0.977	0.925	16865	0.99	-0.631	1.13
SEC13	-9.18	12	-1.44	0.0751	1194	0.977	0.925	16862	0.99	-0.674	1.12
NAA35	-9.17	12	-1.44	0.0752	1195	0.977	0.925	16861	0.99	-0.691	1.12
MT3	-9.19	12	-1.44	0.0746	1188	0.977	0.925	16868	0.99	-0.298	1.13
KIAA1683	-9.17	12	-1.44	0.0753	1196	0.977	0.925	16860	0.99	-0.603	1.12
DHFR	-7.95	9	-1.44	0.0749	1193	0.977	0.925	16863	0.99	-0.333	1.13
TIMM10	-9.16	12	-1.44	0.0755	1198	0.977	0.924	16858	0.99	-1.918	1.12
PRND	-9.15	12	-1.43	0.076	1203	0.977	0.924	16853	0.99	-0.651	1.12
ASIP	-9.14	12	-1.43	0.0764	1211	0.977	0.924	16845	0.99	-0.807	1.12
PCDHGC3	-9.14	12	-1.43	0.0763	1206	0.977	0.924	16850	0.99	-0.402	1.12
GORAB	-9.14	12	-1.43	0.0762	1205	0.977	0.924	16851	0.99	-0.653	1.12
RABL5	-9.15	12	-1.43	0.0761	1204	0.977	0.924	16852	0.99	-0.636	1.12
SKP1	-7.93	9	-1.43	0.0757	1199	0.977	0.924	16857	0.99	-1.218	1.12
CXCR1	-9.15	12	-1.43	0.0758	1201	0.977	0.924	16855	0.99	-0.6	1.12
WARS2	-9.14	12	-1.43	0.0764	1209	0.977	0.924	16847	0.99	-0.754	1.12
RPN1	-9.16	12	-1.43	0.0758	1200	0.977	0.924	16856	0.99	-1.038	1.12
MS4A6E	-9.15	12	-1.43	0.0759	1202	0.977	0.924	16854	0.99	-0.771	1.12
NPRL2	-9.14	12	-1.43	0.0763	1208	0.977	0.924	16848	0.99	-0.306	1.12
IRF7	-9.13	12	-1.43	0.0765	1212	0.977	0.924	16844	0.99	-0.711	1.12
PLEKHM3	-9.13	12	-1.43	0.0766	1213	0.977	0.923	16843	0.99	-0.459	1.12
PHKA2	-9.19	12	-1.44	0.0746	1187	0.977	0.925	16869	0.99	-0.779	1.13
PAPOLG	-9.17	12	-1.44	0.0754	1197	0.977	0.925	16859	0.99	-0.476	1.12
TTC9C	-9.12	12	-1.43	0.0769	1216	0.977	0.923	16840	0.99	-0.741	1.11
MZF1	-9.11	12	-1.42	0.0772	1222	0.977	0.923	16834	0.99	-0.206	1.11
CMIP	-9.14	12	-1.43	0.0763	1207	0.977	0.924	16849	0.99	-0.725	1.12
RAC1	-9.11	12	-1.42	0.0774	1224	0.977	0.923	16832	0.99	-0.974	1.11
NEU1	-9.11	12	-1.42	0.0772	1219	0.977	0.923	16837	0.99	-0.464	1.11
ILF2	-9.11	12	-1.42	0.0772	1223	0.977	0.923	16833	0.99	-1.14	1.11
SGSM3	-9.12	12	-1.43	0.0769	1215	0.977	0.923	16841	0.99	-0.437	1.11
CPAMD8	-9.1	12	-1.42	0.0777	1226	0.977	0.922	16830	0.989	-0.23	1.11
BUB3	-8.33	10	-1.43	0.0768	1214	0.977	0.923	16842	0.99	-1.092	1.11
EFTUD2	-9.11	12	-1.42	0.0772	1220	0.977	0.923	16836	0.99	-1.672	1.11
LRIG2	-9.14	12	-1.43	0.0764	1210	0.977	0.924	16846	0.99	-0.964	1.12
ADORA1	-9.11	12	-1.42	0.0771	1218	0.977	0.923	16838	0.99	-0.429	1.11
GINS1	-9.11	12	-1.42	0.0772	1221	0.977	0.923	16835	0.99	-1.213	1.11
FAM20B	-9.09	12	-1.42	0.0779	1230	0.977	0.922	16826	0.989	-0.428	1.11
JUP	-9.1	12	-1.42	0.0777	1227	0.977	0.922	16829	0.989	-0.563	1.11
ASF1A	-9.1	12	-1.42	0.0777	1228	0.977	0.922	16828	0.989	-0.409	1.11
APOC3	-9.09	12	-1.42	0.0779	1231	0.977	0.922	16825	0.989	-0.757	1.11
EMC9	-9.07	12	-1.41	0.0786	1238	0.977	0.921	16818	0.989	-0.397	1.1
DNAJB8	-9.08	12	-1.42	0.0782	1234	0.977	0.922	16822	0.989	-0.418	1.11
DIRAS3	-9.08	12	-1.42	0.0783	1235	0.977	0.922	16821	0.989	-0.577	1.11
CEND1	-9.09	12	-1.42	0.0781	1233	0.977	0.922	16823	0.989	-0.608	1.11
TAB2	-9.11	12	-1.42	0.0774	1225	0.977	0.923	16831	0.99	-0.774	1.11
IMMP2L	-9.07	12	-1.41	0.0785	1237	0.977	0.921	16819	0.989	-0.697	1.11
POLR2A	-9.07	12	-1.41	0.0786	1239	0.977	0.921	16817	0.989	-0.692	1.1
ATAD5	-9.12	12	-1.43	0.077	1217	0.977	0.923	16839	0.99	-0.373	1.11
FURIN	-9.07	12	-1.41	0.0787	1243	0.977	0.921	16813	0.989	-0.169	1.1
MED14	-9.09	12	-1.42	0.0779	1232	0.977	0.922	16824	0.989	-1.544	1.11
SNAI1	-9.07	12	-1.41	0.0787	1242	0.977	0.921	16814	0.989	-0.506	1.1
RRP1	-9.07	12	-1.42	0.0785	1236	0.977	0.921	16820	0.989	-0.683	1.11
PARVA	-9.06	12	-1.41	0.0788	1245	0.977	0.921	16811	0.989	-0.687	1.1
CHCHD1	-9.07	12	-1.41	0.0787	1241	0.977	0.921	16815	0.989	-0.734	1.1
ATP6V1E2	-9.09	12	-1.42	0.0779	1229	0.977	0.922	16827	0.989	-0.623	1.11
CTNNBIP1	-9.05	12	-1.41	0.0792	1251	0.977	0.921	16805	0.989	-0.391	1.1
KCNG2	-9.06	12	-1.41	0.0788	1244	0.977	0.921	16812	0.989	-0.365	1.1
OR6K6	-9.07	12	-1.41	0.0787	1240	0.977	0.921	16816	0.989	-0.729	1.1
VRK3	-9.06	12	-1.41	0.079	1248	0.977	0.921	16808	0.989	-0.458	1.1
GLB1	-9.05	12	-1.41	0.0792	1249	0.977	0.921	16807	0.989	-0.734	1.1
FRY	-9.04	12	-1.41	0.0795	1255	0.977	0.92	16801	0.989	-0.431	1.1
VPS35	-7.85	9	-1.41	0.079	1246	0.977	0.921	16810	0.989	-0.296	1.1
CLPB	-9.06	12	-1.41	0.079	1247	0.977	0.921	16809	0.989	-0.832	1.1
COMMD7	-9.05	12	-1.41	0.0793	1253	0.977	0.921	16803	0.989	-0.417	1.1
EIF2AK3	-9.05	12	-1.41	0.0793	1252	0.977	0.921	16804	0.989	-0.595	1.1
UQCC2	-9.04	12	-1.41	0.0796	1256	0.977	0.92	16800	0.989	-0.367	1.1
TRIP10	-9.03	12	-1.41	0.08	1259	0.977	0.92	16797	0.989	-0.61	1.1
RABIF	-9.04	12	-1.41	0.0796	1257	0.977	0.92	16799	0.989	-0.521	1.1
BPIFC	-9.01	12	-1.4	0.0806	1269	0.977	0.919	16787	0.989	-0.693	1.09
SERINC3	-9.05	12	-1.41	0.0794	1254	0.977	0.921	16802	0.989	-0.642	1.1
RPAP2	-9.02	12	-1.4	0.0804	1265	0.977	0.92	16791	0.989	-1.033	1.09
XAB2	-7.81	9	-1.4	0.0803	1264	0.977	0.92	16792	0.989	-0.556	1.1
GAL	-9.05	12	-1.41	0.0792	1250	0.977	0.921	16806	0.989	-0.466	1.1
MAGEH1	-9.01	12	-1.4	0.0806	1268	0.977	0.919	16788	0.989	-0.431	1.09
CAPRIN1	-9.01	12	-1.4	0.0806	1270	0.977	0.919	16786	0.989	-0.586	1.09
PIGW	-9.02	12	-1.4	0.0803	1263	0.977	0.92	16793	0.989	-0.644	1.1
C7orf65	-9.04	12	-1.41	0.0796	1258	0.977	0.92	16798	0.989	-0.482	1.1
DBH	-9.02	12	-1.4	0.0803	1262	0.977	0.92	16794	0.989	-0.607	1.1
GLRA2	-9.01	12	-1.4	0.0807	1271	0.977	0.919	16785	0.989	-0.459	1.09
APOL2	-9	12	-1.4	0.0811	1273	0.977	0.919	16783	0.989	-0.329	1.09
LSM2	-9.01	12	-1.4	0.0805	1266	0.977	0.919	16790	0.989	-2.778	1.09
SLC23A1	-8.97	12	-1.39	0.0819	1282	0.977	0.918	16774	0.988	-0.466	1.09
TNFRSF18	-8.99	12	-1.4	0.0812	1274	0.977	0.919	16782	0.989	-0.665	1.09
ARX	-9.01	12	-1.4	0.0805	1267	0.977	0.919	16789	0.989	-0.526	1.09
NAB2	-9.02	12	-1.4	0.0802	1261	0.977	0.92	16795	0.989	-0.558	1.1
BANP	-7.77	9	-1.39	0.082	1283	0.977	0.918	16773	0.988	-0.727	1.09
RTKN2	-9.02	12	-1.4	0.0801	1260	0.977	0.92	16796	0.989	-0.769	1.1
CXorf38	-8.96	12	-1.39	0.0822	1287	0.977	0.918	16769	0.988	-0.737	1.09
KRTAP3-1	-8.98	12	-1.39	0.0818	1281	0.977	0.918	16775	0.988	-0.477	1.09
NCEH1	-8.99	12	-1.4	0.0813	1275	0.977	0.919	16781	0.988	-0.412	1.09
CREB3L1	-8.98	12	-1.39	0.0816	1280	0.977	0.918	16776	0.988	-0.591	1.09
FUK	-8.99	12	-1.4	0.0814	1277	0.977	0.919	16779	0.988	-0.564	1.09
PABPC4	-8.97	12	-1.39	0.0821	1285	0.977	0.918	16771	0.988	-0.665	1.09
C1orf35	-8.99	12	-1.4	0.0814	1276	0.977	0.919	16780	0.988	-0.472	1.09
ANKRD33B	-8.97	12	-1.39	0.0821	1284	0.977	0.918	16772	0.988	-0.825	1.09
EXOC6B	-9	12	-1.4	0.0811	1272	0.977	0.919	16784	0.989	-0.2	1.09
C21orf2	-8.99	12	-1.4	0.0814	1278	0.977	0.919	16778	0.988	-0.384	1.09
GRB14	-8.98	12	-1.4	0.0815	1279	0.977	0.919	16777	0.988	-0.744	1.09
RRAGD	-8.95	12	-1.39	0.0827	1295	0.977	0.917	16761	0.988	-0.332	1.08
VANGL1	-8.93	12	-1.38	0.0833	1307	0.977	0.917	16749	0.988	-0.329	1.08
TBC1D25	-8.94	12	-1.39	0.0829	1299	0.977	0.917	16757	0.988	-0.586	1.08
PPP2R5D	-8.96	12	-1.39	0.0823	1288	0.977	0.918	16768	0.988	-0.354	1.08
FBXL4	-8.97	12	-1.39	0.0822	1286	0.977	0.918	16770	0.988	-0.46	1.09
KDM6B	-8.95	12	-1.39	0.0826	1293	0.977	0.917	16763	0.988	-0.473	1.08
WDR33	-8.95	12	-1.39	0.0828	1296	0.977	0.917	16760	0.988	-1.979	1.08
CCL26	-8.94	12	-1.38	0.083	1302	0.977	0.917	16754	0.988	-0.426	1.08
DNER	-8.93	12	-1.38	0.0834	1310	0.977	0.917	16746	0.988	-0.246	1.08
COPS5	-8.96	12	-1.39	0.0823	1289	0.977	0.918	16767	0.988	-1.378	1.08
GEMIN7	-8.95	12	-1.39	0.0827	1294	0.977	0.917	16762	0.988	-1.241	1.08
RARS	-8.93	12	-1.38	0.0832	1304	0.977	0.917	16752	0.988	-1.073	1.08
PRAMEF2	-7.73	9	-1.38	0.0836	1315	0.977	0.916	16741	0.988	-0.625	1.08
NTNG2	-8.94	12	-1.39	0.083	1301	0.977	0.917	16755	0.988	-0.505	1.08
RPS23	-8.92	12	-1.38	0.0837	1316	0.977	0.916	16740	0.988	-0.788	1.08
RTN3	-8.95	12	-1.39	0.0826	1291	0.977	0.917	16765	0.988	-0.643	1.08
GABRR1	-8.96	12	-1.39	0.0824	1290	0.977	0.918	16766	0.988	-0.425	1.08
ANKLE2	-8.94	12	-1.38	0.083	1303	0.977	0.917	16753	0.988	-0.871	1.08
OSGIN1	-8.93	12	-1.38	0.0832	1305	0.977	0.917	16751	0.988	-0.755	1.08
ERCC6L	-8.92	12	-1.38	0.0836	1314	0.977	0.916	16742	0.988	-0.329	1.08
PDE4D	-8.93	12	-1.38	0.0834	1309	0.977	0.917	16747	0.988	-0.511	1.08
RPS19	-7.73	9	-1.38	0.0834	1311	0.977	0.917	16745	0.988	-1.059	1.08
SYT5	-8.94	12	-1.39	0.0829	1300	0.977	0.917	16756	0.988	-0.99	1.08
IFI16	-8.92	12	-1.38	0.0836	1313	0.977	0.916	16743	0.988	-0.597	1.08
KIF2A	-8.94	12	-1.39	0.0829	1298	0.977	0.917	16758	0.988	-0.587	1.08
OR1M1	-8.91	12	-1.38	0.0842	1320	0.977	0.916	16736	0.988	-0.383	1.07
RTTN	-8.93	12	-1.38	0.0832	1306	0.977	0.917	16750	0.988	-0.691	1.08
SLC52A3	-8.93	12	-1.38	0.0834	1308	0.977	0.917	16748	0.988	-0.615	1.08
HIAT1	-8.9	12	-1.38	0.0844	1322	0.977	0.916	16734	0.988	-0.392	1.07
NUP155	-8.9	12	-1.38	0.0844	1321	0.977	0.916	16735	0.988	-1.356	1.07
ELAC2	-8.95	12	-1.39	0.0829	1297	0.977	0.917	16759	0.988	-0.751	1.08
MCTS1	-8.92	12	-1.38	0.0839	1319	0.977	0.916	16737	0.988	-0.71	1.08
REXO1	-8.95	12	-1.39	0.0826	1292	0.977	0.917	16764	0.988	-0.511	1.08
OCIAD2	-8.89	12	-1.37	0.0849	1327	0.977	0.915	16729	0.988	-0.279	1.07
ZFYVE9	-8.88	12	-1.37	0.0851	1332	0.977	0.915	16724	0.988	-0.572	1.07
ODF1	-8.92	12	-1.38	0.0838	1317	0.977	0.916	16739	0.988	-0.657	1.08
PCNP	-7.69	9	-1.37	0.0854	1335	0.977	0.915	16721	0.988	-0.248	1.07
SEZ6	-8.89	12	-1.37	0.0847	1326	0.977	0.915	16730	0.988	-0.432	1.07
AHCTF1	-8.89	12	-1.37	0.0849	1328	0.977	0.915	16728	0.988	-0.709	1.07
RNF31	-8.86	12	-1.37	0.0858	1346	0.977	0.914	16710	0.988	-0.586	1.07
CALN1	-8.92	12	-1.38	0.0839	1318	0.977	0.916	16738	0.988	-0.625	1.08
UBE2Z	-8.88	12	-1.37	0.0851	1330	0.977	0.915	16726	0.988	-0.848	1.07
GGT7	-8.9	12	-1.38	0.0844	1323	0.977	0.916	16733	0.988	-0.6	1.07
NEDD9	-8.86	12	-1.37	0.0858	1343	0.977	0.914	16713	0.988	-0.539	1.07
KREMEN2	-8.9	12	-1.37	0.0846	1324	0.977	0.915	16732	0.988	-0.704	1.07
LSMEM2	-8.89	12	-1.37	0.0847	1325	0.977	0.915	16731	0.988	-0.618	1.07
RPTOR	-8.88	12	-1.37	0.0853	1333	0.977	0.915	16723	0.988	-0.865	1.07
MGAT3	-8.86	12	-1.37	0.0857	1341	0.977	0.914	16715	0.988	-0.192	1.07
CDC7	-8.85	12	-1.36	0.0862	1354	0.977	0.914	16702	0.988	-1.378	1.06
DLK1	-8.93	12	-1.38	0.0835	1312	0.977	0.916	16744	0.988	-0.595	1.08
SMIM12	-8.85	12	-1.36	0.0863	1355	0.977	0.914	16701	0.988	-0.795	1.06
PPP1R14D	-8.51	11	-1.37	0.085	1329	0.977	0.915	16727	0.988	-0.679	1.07
RAE1	-8.87	12	-1.37	0.0854	1336	0.977	0.915	16720	0.988	-0.671	1.07
C5orf55	-8.87	12	-1.37	0.0855	1339	0.977	0.914	16717	0.988	-0.588	1.07
UBR7	-8.86	12	-1.37	0.0858	1344	0.977	0.914	16712	0.988	-0.611	1.07
ELMSAN1	-8.88	12	-1.37	0.0851	1331	0.977	0.915	16725	0.988	-0.708	1.07
KIF17	-8.87	12	-1.37	0.0854	1337	0.977	0.915	16719	0.988	-0.22	1.07
DGCR8	-8.82	12	-1.36	0.0874	1368	0.977	0.913	16688	0.987	-0.313	1.06
ZGLP1	-8.85	12	-1.36	0.0864	1356	0.977	0.914	16700	0.988	-0.76	1.06
PEX5	-8.86	12	-1.37	0.0859	1348	0.977	0.914	16708	0.988	-0.264	1.07
HRSP12	-8.86	12	-1.37	0.0858	1342	0.977	0.914	16714	0.988	-0.529	1.07
GNMT	-8.86	12	-1.37	0.086	1350	0.977	0.914	16706	0.988	-0.409	1.07
GRXCR1	-8.83	12	-1.36	0.0869	1362	0.977	0.913	16694	0.988	-0.782	1.06
AUNIP	-8.87	12	-1.37	0.0853	1334	0.977	0.915	16722	0.988	-0.38	1.07
MTF1	-8.86	12	-1.37	0.086	1352	0.977	0.914	16704	0.988	-0.507	1.07
HS6ST2	-8.83	12	-1.36	0.0868	1361	0.977	0.913	16695	0.988	-0.471	1.06
TULP1	-8.84	12	-1.36	0.0865	1358	0.977	0.913	16698	0.988	-0.391	1.06
ARHGAP15	-8.86	12	-1.37	0.086	1351	0.977	0.914	16705	0.988	-0.54	1.07
NNAT	-8.86	12	-1.37	0.0858	1345	0.977	0.914	16711	0.988	-0.779	1.07
QPRT	-8.87	12	-1.37	0.0856	1340	0.977	0.914	16716	0.988	-0.947	1.07
ZNF507	-8.84	12	-1.36	0.0866	1359	0.977	0.913	16697	0.988	-0.559	1.06
MRPS23	-8.86	12	-1.37	0.0859	1347	0.977	0.914	16709	0.988	-0.558	1.07
DDX59	-7.67	9	-1.37	0.0861	1353	0.977	0.914	16703	0.988	-0.408	1.06
TMEM222	-8.87	12	-1.37	0.0855	1338	0.977	0.914	16718	0.988	-0.804	1.07
TEX29	-8.82	12	-1.36	0.0874	1367	0.977	0.913	16689	0.987	-0.39	1.06
TIMM17A	-8.84	12	-1.36	0.0867	1360	0.977	0.913	16696	0.988	-0.498	1.06
ZP1	-8.86	12	-1.37	0.0859	1349	0.977	0.914	16707	0.988	-0.358	1.07
MAST2	-8.8	12	-1.35	0.0879	1374	0.977	0.912	16682	0.987	-0.758	1.06
TMEM158	-8.82	12	-1.36	0.0874	1369	0.977	0.913	16687	0.987	-0.387	1.06
C4orf50	-8.83	12	-1.36	0.0871	1365	0.977	0.913	16691	0.987	-0.449	1.06
FCRL6	-8.84	12	-1.36	0.0865	1357	0.977	0.914	16699	0.988	-0.513	1.06
DCAF12L1	-8.81	12	-1.36	0.0876	1370	0.977	0.912	16686	0.987	-0.389	1.06
ZNF354A	-8.8	12	-1.35	0.0881	1381	0.977	0.912	16675	0.987	-0.432	1.06
SERPINA9	-8.79	12	-1.35	0.0884	1384	0.977	0.912	16672	0.987	-0.36	1.05
RPSA	-8.8	12	-1.35	0.088	1376	0.977	0.912	16680	0.987	-1.262	1.06
ROMO1	-7.64	9	-1.36	0.0871	1366	0.977	0.913	16690	0.987	-0.517	1.06
TICRR	-8.81	12	-1.35	0.0878	1373	0.977	0.912	16683	0.987	-0.585	1.06
C19orf45	-8.8	12	-1.35	0.0881	1380	0.977	0.912	16676	0.987	-0.396	1.06
PAQR6	-8.81	12	-1.35	0.0878	1372	0.977	0.912	16684	0.987	-0.5	1.06
PRRT4	-8.83	12	-1.36	0.087	1363	0.977	0.913	16693	0.987	-0.495	1.06
MSH5	-8.8	12	-1.35	0.0881	1379	0.977	0.912	16677	0.987	-0.568	1.06
PKNOX1	-8.78	12	-1.35	0.0887	1388	0.977	0.911	16668	0.987	-0.419	1.05
TLE2	-8.79	12	-1.35	0.0882	1382	0.977	0.912	16674	0.987	-0.488	1.05
PHF20	-8.8	12	-1.35	0.088	1377	0.977	0.912	16679	0.987	-0.677	1.06
YWHAE	-8.83	12	-1.36	0.087	1364	0.977	0.913	16692	0.987	-0.544	1.06
KNCN	-8.79	12	-1.35	0.0885	1386	0.977	0.912	16670	0.987	-0.794	1.05
CHMP4B	-8.79	12	-1.35	0.0883	1383	0.977	0.912	16673	0.987	-0.771	1.05
RNF212	-8.78	12	-1.35	0.0886	1387	0.977	0.911	16669	0.987	-0.45	1.05
ADCY7	-8.8	12	-1.35	0.0879	1375	0.977	0.912	16681	0.987	-0.963	1.06
DCLRE1B	-8.8	12	-1.35	0.088	1378	0.977	0.912	16678	0.987	-0.551	1.06
ICMT	-8.77	12	-1.35	0.089	1390	0.977	0.911	16666	0.987	-0.619	1.05
SLC17A4	-8.79	12	-1.35	0.0884	1385	0.977	0.912	16671	0.987	-0.712	1.05
TP53TG5	-8.76	12	-1.34	0.0897	1396	0.977	0.91	16660	0.987	-0.468	1.05
FBXO24	-8.77	12	-1.35	0.0892	1391	0.977	0.911	16665	0.987	-0.412	1.05
PGS1	-8.74	12	-1.34	0.0901	1402	0.977	0.91	16654	0.986	-0.449	1.05
ITM2A	-8.74	12	-1.34	0.0902	1404	0.977	0.91	16652	0.986	-0.418	1.04
ZBTB4	-8.75	12	-1.34	0.0897	1397	0.977	0.91	16659	0.987	-0.67	1.05
BRINP3	-8.81	12	-1.36	0.0876	1371	0.977	0.912	16685	0.987	-0.411	1.06
C10orf25	-7.58	9	-1.34	0.0896	1395	0.977	0.91	16661	0.987	-0.566	1.05
METTL9	-8.76	12	-1.34	0.0894	1393	0.977	0.911	16663	0.987	-0.55	1.05
ERVV-2	-8.75	12	-1.34	0.0899	1398	0.977	0.91	16658	0.986	-0.61	1.05
NUCB2	-8.73	12	-1.34	0.0904	1407	0.977	0.91	16649	0.986	-0.485	1.04
GIMAP5	-8.73	12	-1.34	0.0905	1408	0.977	0.909	16648	0.986	-0.435	1.04
ABCE1	-8.75	12	-1.34	0.09	1401	0.977	0.91	16655	0.986	-1.358	1.05
FCGR1A	-8.73	12	-1.34	0.0906	1410	0.977	0.909	16646	0.986	-0.454	1.04
RARRES3	-8.76	12	-1.34	0.0896	1394	0.977	0.91	16662	0.987	-0.25	1.05
GP1BB	-8.77	12	-1.35	0.0893	1392	0.977	0.911	16664	0.987	-0.821	1.05
AGR3	-8.73	12	-1.34	0.0907	1411	0.977	0.909	16645	0.986	-0.881	1.04
SMYD3	-8.73	12	-1.34	0.0904	1406	0.977	0.91	16650	0.986	-0.49	1.04
NUDT21	-8.74	12	-1.34	0.0903	1405	0.977	0.91	16651	0.986	-2.373	1.04
ZBTB21	-8.72	12	-1.33	0.0911	1413	0.977	0.909	16643	0.986	-0.285	1.04
FAM114A1	-8.72	12	-1.33	0.0911	1414	0.977	0.909	16642	0.986	-0.341	1.04
NME2	-7.58	9	-1.34	0.0899	1399	0.977	0.91	16657	0.986	-0.776	1.05
CACNA2D2	-8.71	12	-1.33	0.0912	1418	0.977	0.909	16638	0.986	-0.884	1.04
RETSAT	-8.72	12	-1.34	0.0908	1412	0.977	0.909	16644	0.986	-0.69	1.04
SYNPO2L	-8.71	12	-1.33	0.0914	1421	0.977	0.909	16635	0.986	-0.557	1.04
FAM98C	-8.75	12	-1.34	0.09	1400	0.977	0.91	16656	0.986	-0.457	1.05
CCND2	-8.73	12	-1.34	0.0905	1409	0.977	0.909	16647	0.986	-0.591	1.04
GLTP	-8.7	12	-1.33	0.0918	1426	0.977	0.908	16630	0.986	-0.323	1.04
VHL	-8.69	12	-1.33	0.0921	1434	0.977	0.908	16622	0.986	-1.569	1.04
HIRA	-8.71	12	-1.33	0.0912	1419	0.977	0.909	16637	0.986	-0.254	1.04
CARF	-8.69	12	-1.33	0.0921	1432	0.977	0.908	16624	0.986	-0.445	1.04
ZNF14	-8.69	12	-1.33	0.0921	1433	0.977	0.908	16623	0.986	-0.489	1.04
GPX5	-8.72	12	-1.33	0.0911	1416	0.977	0.909	16640	0.986	-0.806	1.04
SLCO1B3	-8.74	12	-1.34	0.0902	1403	0.977	0.91	16653	0.986	-0.479	1.04
HNRNPH2	-8.71	12	-1.33	0.0912	1417	0.977	0.909	16639	0.986	-0.511	1.04
DCUN1D1	-8.68	12	-1.33	0.0925	1437	0.977	0.908	16619	0.986	-0.677	1.03
KIAA0319L	-8.72	12	-1.33	0.0911	1415	0.977	0.909	16641	0.986	-0.544	1.04
AMOTL1	-8.67	12	-1.32	0.0927	1441	0.977	0.907	16615	0.986	-0.758	1.03
CRNN	-8.71	12	-1.33	0.0913	1420	0.977	0.909	16636	0.986	-0.335	1.04
CACNA1E	-8.69	12	-1.33	0.092	1430	0.977	0.908	16626	0.986	-0.256	1.04
AMBRA1	-8.69	12	-1.33	0.0922	1435	0.977	0.908	16621	0.986	-0.527	1.04
IL18	-8.68	12	-1.33	0.0925	1438	0.977	0.908	16618	0.986	-0.466	1.03
HIPK3	-8.69	12	-1.33	0.092	1429	0.977	0.908	16627	0.986	-0.438	1.04
TRMT12	-8.71	12	-1.33	0.0915	1423	0.977	0.908	16633	0.986	-0.376	1.04
ZZEF1	-8.67	12	-1.32	0.0927	1442	0.977	0.907	16614	0.986	-0.639	1.03
SMPDL3A	-8.71	12	-1.33	0.0914	1422	0.977	0.909	16634	0.986	-0.549	1.04
NDNL2	-8.7	12	-1.33	0.0918	1427	0.977	0.908	16629	0.986	-0.985	1.04
NT5C2	-8.7	12	-1.33	0.0916	1424	0.977	0.908	16632	0.986	-0.43	1.04
F13B	-8.66	12	-1.32	0.0931	1446	0.977	0.907	16610	0.986	-0.875	1.03
TUBGCP4	-8.7	12	-1.33	0.0917	1425	0.977	0.908	16631	0.986	-0.462	1.04
HSP90AB1	-8.69	12	-1.33	0.0921	1431	0.977	0.908	16625	0.986	-0.561	1.04
SPAG5	-8.67	12	-1.32	0.0928	1443	0.977	0.907	16613	0.986	-0.747	1.03
LATS1	-8.69	12	-1.33	0.0922	1436	0.977	0.908	16620	0.986	-0.448	1.04
APEH	-8.68	12	-1.33	0.0925	1439	0.977	0.907	16617	0.986	-0.637	1.03
FAM106A	-8.67	12	-1.32	0.0928	1444	0.977	0.907	16612	0.986	-0.635	1.03
PLK2	-8.7	12	-1.33	0.0919	1428	0.977	0.908	16628	0.986	-0.327	1.04
PI4KA	-8.66	12	-1.32	0.0932	1448	0.977	0.907	16608	0.986	-0.621	1.03
SCGB2A1	-7.5	9	-1.32	0.0932	1450	0.977	0.907	16606	0.986	-0.655	1.03
CYSLTR1	-8.64	12	-1.32	0.0942	1467	0.977	0.906	16589	0.986	-0.387	1.03
MTA2	-8.66	12	-1.32	0.0934	1455	0.977	0.907	16601	0.986	-0.522	1.03
TTK	-8.66	12	-1.32	0.0933	1451	0.977	0.907	16605	0.986	-1.118	1.03
SEPHS1	-8.64	12	-1.32	0.0938	1463	0.977	0.906	16593	0.986	-0.421	1.03
FAM200B	-8.65	12	-1.32	0.0935	1457	0.977	0.907	16599	0.986	-0.329	1.03
LAMB4	-8.68	12	-1.33	0.0926	1440	0.977	0.907	16616	0.986	-0.756	1.03
RANBP9	-8.65	12	-1.32	0.0936	1458	0.977	0.906	16598	0.986	-0.563	1.03
ZMYM2	-8.67	12	-1.32	0.093	1445	0.977	0.907	16611	0.986	-0.462	1.03
RPL27	-6.12	6	-1.32	0.0934	1456	0.977	0.907	16600	0.986	-1.056	1.03
DHPS	-8.66	12	-1.32	0.0932	1449	0.977	0.907	16607	0.986	-0.88	1.03
SPATS1	-8.62	12	-1.31	0.0946	1475	0.977	0.905	16581	0.986	-0.383	1.02
OR1E2	-7.49	9	-1.32	0.0937	1462	0.977	0.906	16594	0.986	-0.765	1.03
KCTD14	-8.66	12	-1.32	0.0933	1452	0.977	0.907	16604	0.986	0.138	1.03
PLXNB1	-8.66	12	-1.32	0.0933	1453	0.977	0.907	16603	0.986	-0.498	1.03
FEN1	-8.66	12	-1.32	0.0931	1447	0.977	0.907	16609	0.986	-0.991	1.03
ARL6IP5	-8.65	12	-1.32	0.0936	1460	0.977	0.906	16596	0.986	-0.33	1.03
TM4SF4	-8.66	12	-1.32	0.0934	1454	0.977	0.907	16602	0.986	-0.924	1.03
PIK3CG	-8.64	12	-1.32	0.0938	1464	0.977	0.906	16592	0.986	-0.611	1.03
C20orf197	-8.62	12	-1.31	0.0948	1480	0.977	0.905	16576	0.986	-0.88	1.02
RBM24	-8.64	12	-1.32	0.0939	1465	0.977	0.906	16591	0.986	-0.411	1.03
FAM196B	-8.63	12	-1.31	0.0945	1472	0.977	0.906	16584	0.986	-0.374	1.02
DNAJC12	-8.63	12	-1.31	0.0943	1470	0.977	0.906	16586	0.986	-0.613	1.03
HBE1	-8.63	12	-1.31	0.0946	1474	0.977	0.905	16582	0.986	-0.551	1.02
ERMAP	-7.47	9	-1.31	0.0947	1477	0.977	0.905	16579	0.986	-0.46	1.02
DMWD	-8.63	12	-1.31	0.0943	1469	0.977	0.906	16587	0.986	-0.383	1.03
PRKAR2A	-8.64	12	-1.32	0.0939	1466	0.977	0.906	16590	0.986	-0.761	1.03
SDF4	-8.62	12	-1.31	0.0946	1476	0.977	0.905	16580	0.986	-0.422	1.02
ZNF684	-8.63	12	-1.31	0.0944	1471	0.977	0.906	16585	0.986	-0.51	1.03
ZBTB8OS	-8.65	12	-1.32	0.0936	1459	0.977	0.906	16597	0.986	-0.581	1.03
COLQ	-8.63	12	-1.31	0.0945	1473	0.977	0.905	16583	0.986	-0.653	1.02
HYOU1	-8.63	12	-1.31	0.0943	1468	0.977	0.906	16588	0.986	-0.463	1.03
MRPL22	-8.65	12	-1.32	0.0937	1461	0.977	0.906	16595	0.986	-0.785	1.03
ING5	-7.47	9	-1.31	0.0947	1478	0.977	0.905	16578	0.986	-0.449	1.02
GALR3	-8.62	12	-1.31	0.095	1484	0.977	0.905	16572	0.986	-0.378	1.02
UBE2K	-8.62	12	-1.31	0.0948	1479	0.977	0.905	16577	0.986	-0.769	1.02
PRDM1	-8.62	12	-1.31	0.0949	1482	0.977	0.905	16574	0.986	-0.402	1.02
PPARD	-8.61	12	-1.31	0.0953	1487	0.977	0.905	16569	0.986	-0.285	1.02
FAM8A1	-8.59	12	-1.31	0.0959	1495	0.977	0.904	16561	0.986	-0.297	1.02
SLC25A13	-8.62	12	-1.31	0.0949	1481	0.977	0.905	16575	0.986	-0.692	1.02
ITPKC	-8.59	12	-1.3	0.096	1496	0.977	0.904	16560	0.986	-0.512	1.02
LGI4	-8.61	12	-1.31	0.0952	1485	0.977	0.905	16571	0.986	-0.34	1.02
MYEOV	-8.6	12	-1.31	0.0956	1490	0.977	0.904	16566	0.986	-0.541	1.02
ATXN10	-8.62	12	-1.31	0.095	1483	0.977	0.905	16573	0.986	-0.637	1.02
KLHL6	-7.84	10	-1.3	0.0962	1499	0.977	0.904	16557	0.986	-0.231	1.02
CIAO1	-8.6	12	-1.31	0.0955	1489	0.977	0.905	16567	0.986	-1.136	1.02
HRH4	-8.6	12	-1.31	0.0956	1491	0.977	0.904	16565	0.986	-0.523	1.02
OTOL1	-8.59	12	-1.3	0.096	1497	0.977	0.904	16559	0.986	-0.527	1.02
TRPT1	-8.58	12	-1.3	0.0965	1506	0.977	0.903	16550	0.986	-0.622	1.02
GLS	-8.61	12	-1.31	0.0953	1486	0.977	0.905	16570	0.986	-0.326	1.02
RNASEH1	-8.59	12	-1.31	0.0959	1493	0.977	0.904	16563	0.986	-0.203	1.02
NLRP10	-8.59	12	-1.31	0.0959	1494	0.977	0.904	16562	0.986	-0.25	1.02
KCNH8	-8.58	12	-1.3	0.0963	1503	0.977	0.904	16553	0.986	-0.52	1.02
TCN1	-8.57	12	-1.3	0.0969	1509	0.977	0.903	16547	0.985	-0.634	1.01
DFFA	-8.55	12	-1.3	0.0977	1524	0.977	0.902	16532	0.985	-0.825	1.01
TDRD6	-8.56	12	-1.3	0.0969	1510	0.977	0.903	16546	0.985	-0.558	1.01
RHOC	-8.59	12	-1.3	0.096	1498	0.977	0.904	16558	0.986	-0.478	1.02
IL10	-8.58	12	-1.3	0.0963	1501	0.977	0.904	16555	0.986	-0.459	1.02
SCLY	-8.56	12	-1.3	0.097	1512	0.977	0.903	16544	0.985	-0.414	1.01
EGLN2	-8.58	12	-1.3	0.0963	1502	0.977	0.904	16554	0.986	-0.557	1.02
TCHH	-8.6	12	-1.31	0.0957	1492	0.977	0.904	16564	0.986	-0.507	1.02
CHRM4	-8.58	12	-1.3	0.0965	1505	0.977	0.904	16551	0.986	-0.523	1.02
ZBTB7C	-8.6	12	-1.31	0.0954	1488	0.977	0.905	16568	0.986	-0.59	1.02
COL4A3BP	-8.58	12	-1.3	0.0964	1504	0.977	0.904	16552	0.986	-0.795	1.02
BCL9	-8.55	12	-1.3	0.0974	1519	0.977	0.903	16537	0.985	-0.882	1.01
KDM8	-8.54	12	-1.29	0.098	1529	0.977	0.902	16527	0.985	-0.389	1.01
EVX1	-8.56	12	-1.3	0.097	1514	0.977	0.903	16542	0.985	-0.745	1.01
TULP3	-8.58	12	-1.3	0.0962	1500	0.977	0.904	16556	0.986	-0.627	1.02
SPATA32	-8.56	12	-1.3	0.0971	1518	0.977	0.903	16538	0.985	-0.529	1.01
ZC3H3	-8.56	12	-1.3	0.097	1515	0.977	0.903	16541	0.985	-0.74	1.01
ADC	-8.56	12	-1.3	0.097	1511	0.977	0.903	16545	0.985	-0.723	1.01
FAM98A	-8.56	12	-1.3	0.0971	1516	0.977	0.903	16540	0.985	-0.873	1.01
SH3PXD2A	-8.57	12	-1.3	0.0966	1507	0.977	0.903	16549	0.986	-0.405	1.02
ZNF440	-8.57	12	-1.3	0.0966	1508	0.977	0.903	16548	0.986	-0.694	1.02
MAB21L3	-8.56	12	-1.3	0.0971	1517	0.977	0.903	16539	0.985	-0.508	1.01
PROCR	-8.55	12	-1.3	0.0975	1520	0.977	0.903	16536	0.985	-0.164	1.01
SLC22A12	-8.53	12	-1.29	0.0981	1531	0.977	0.902	16525	0.985	-0.717	1.01
CCDC93	-8.54	12	-1.29	0.098	1530	0.977	0.902	16526	0.985	-0.755	1.01
SLC38A10	-8.54	12	-1.29	0.0979	1528	0.977	0.902	16528	0.985	-0.538	1.01
KIAA1430	-8.55	12	-1.3	0.0975	1522	0.977	0.903	16534	0.985	-0.671	1.01
PNRC2	-8.54	12	-1.29	0.0978	1525	0.977	0.902	16531	0.985	-0.708	1.01
FAU	-8.53	12	-1.29	0.0982	1534	0.977	0.902	16522	0.985	-1.176	1.01
PROB1	-8.53	12	-1.29	0.0983	1537	0.977	0.902	16519	0.985	-0.68	1.01
CYP27C1	-8.54	12	-1.29	0.0978	1526	0.977	0.902	16530	0.985	-0.616	1.01
TAF3	-8.56	12	-1.3	0.097	1513	0.977	0.903	16543	0.985	-0.274	1.01
PGC	-8.53	12	-1.29	0.0982	1536	0.977	0.902	16520	0.985	-0.707	1.01
RRM2	-8.55	12	-1.3	0.0976	1523	0.977	0.902	16533	0.985	-0.801	1.01
CDC25B	-8.52	12	-1.29	0.0985	1543	0.977	0.901	16513	0.985	-0.823	1.01
FLT4	-8.53	12	-1.29	0.0983	1538	0.977	0.902	16518	0.985	-0.193	1.01
BUD31	-8.52	12	-1.29	0.0985	1544	0.977	0.901	16512	0.985	-0.918	1.01
ZNF599	-8.55	12	-1.3	0.0975	1521	0.977	0.903	16535	0.985	-0.599	1.01
NIT1	-8.53	12	-1.29	0.0982	1535	0.977	0.902	16521	0.985	-0.823	1.01
CKAP2	-8.54	12	-1.29	0.0978	1527	0.977	0.902	16529	0.985	-0.38	1.01
NR2F6	-7.36	9	-1.28	0.0997	1561	0.977	0.9	16495	0.985	-0.488	1
CAMLG	-8.5	12	-1.29	0.0993	1554	0.977	0.901	16502	0.985	-0.738	1
ASCC2	-8.52	12	-1.29	0.0987	1548	0.977	0.901	16508	0.985	-0.634	1.01
FRMPD1	-8.49	12	-1.28	0.0997	1562	0.977	0.9	16494	0.985	-0.361	1
TAL1	-8.53	12	-1.29	0.0981	1532	0.977	0.902	16524	0.985	-0.826	1.01
UBA52	-7.38	9	-1.29	0.0985	1542	0.977	0.902	16514	0.985	-1.807	1.01
ATPAF2	-8.53	12	-1.29	0.0984	1540	0.977	0.902	16516	0.985	-0.216	1.01
METTL16	-8.52	12	-1.29	0.0987	1549	0.977	0.901	16507	0.985	-0.867	1.01
OBSCN	-8.52	12	-1.29	0.0989	1550	0.977	0.901	16506	0.985	-0.704	1
RBM39	-8.51	12	-1.29	0.099	1552	0.977	0.901	16504	0.985	-0.758	1
ATL2	-8.53	12	-1.29	0.0984	1539	0.977	0.902	16517	0.985	-0.842	1.01
C1orf229	-8.52	12	-1.29	0.0986	1547	0.977	0.901	16509	0.985	-0.544	1.01
BTBD18	-8.53	12	-1.29	0.0982	1533	0.977	0.902	16523	0.985	-0.563	1.01
RCVRN	-8.53	12	-1.29	0.0985	1541	0.977	0.902	16515	0.985	-0.384	1.01
DHX33	-8.52	12	-1.29	0.0986	1546	0.977	0.901	16510	0.985	-1.231	1.01
AFAP1L2	-8.5	12	-1.28	0.0995	1558	0.977	0.901	16498	0.985	-1.036	1
SCAF1	-8.52	12	-1.29	0.0986	1545	0.977	0.901	16511	0.985	-0.378	1.01
SOD1	-8.5	12	-1.28	0.0995	1557	0.977	0.901	16499	0.985	-0.971	1
OR2L5	-6.02	6	-1.29	0.099	1551	0.977	0.901	16505	0.985	-0.293	1
STAT5A	-8.49	12	-1.28	0.0999	1563	0.977	0.9	16493	0.985	0.022	1
FHOD1	-8.5	12	-1.28	0.0996	1560	0.977	0.9	16496	0.985	-0.47	1
PISD	-8.51	12	-1.29	0.0991	1553	0.977	0.901	16503	0.985	-1.002	1
FH	-8.48	12	-1.28	0.1	1569	0.977	0.9	16487	0.985	-0.472	1
CST9	-8.5	12	-1.29	0.0994	1555	0.977	0.901	16501	0.985	-0.616	1
SYMPK	-8.48	12	-1.28	0.1	1566	0.977	0.9	16490	0.985	-0.704	1
GAN	-8.48	12	-1.28	0.1	1567	0.977	0.9	16489	0.985	-0.258	1
RHBG	-8.5	12	-1.28	0.0996	1559	0.977	0.9	16497	0.985	-0.581	1
NARFL	-8.5	12	-1.28	0.0994	1556	0.977	0.901	16500	0.985	-1.589	1
NPAS2	-8.46	12	-1.27	0.101	1590	0.977	0.899	16466	0.985	-0.823	1
GIT1	-8.49	12	-1.28	0.1	1565	0.977	0.9	16491	0.985	-0.525	1
TPGS1	-8.47	12	-1.28	0.101	1575	0.977	0.899	16481	0.985	-0.846	1
OR2L13	-8.48	12	-1.28	0.1	1570	0.977	0.9	16486	0.985	-0.523	1
P2RY12	-8.47	12	-1.28	0.101	1577	0.977	0.899	16479	0.985	-0.398	1
SLC7A13	-8.48	12	-1.28	0.1	1573	0.977	0.9	16483	0.985	-0.307	1
ZNF541	-8.47	12	-1.28	0.101	1578	0.977	0.899	16478	0.985	-0.412	1
LIM2	-8.46	12	-1.28	0.101	1586	0.977	0.899	16470	0.985	-0.265	1
SLC13A1	-8.45	12	-1.27	0.101	1592	0.977	0.899	16464	0.985	-0.367	1
CRIPAK	-8.48	12	-1.28	0.1	1568	0.977	0.9	16488	0.985	-0.38	1
VANGL2	-8.47	12	-1.28	0.101	1579	0.977	0.899	16477	0.985	-0.505	1
DIXDC1	-8.47	12	-1.28	0.101	1581	0.977	0.899	16475	0.985	-0.777	1
PIN4	-8.46	12	-1.28	0.101	1582	0.977	0.899	16474	0.985	-0.465	1
TNIP2	-8.49	12	-1.28	0.0999	1564	0.977	0.9	16492	0.985	-0.142	1
PYCARD	-8.48	12	-1.28	0.1	1571	0.977	0.9	16485	0.985	-0.509	1
STX18	-8.48	12	-1.28	0.1	1572	0.977	0.9	16484	0.985	-0.987	1
C19orf24	-8.46	12	-1.27	0.101	1589	0.977	0.899	16467	0.985	-0.451	1
AMDHD2	-8.47	12	-1.28	0.101	1580	0.977	0.899	16476	0.985	-0.644	1
THRB	-8.47	12	-1.28	0.101	1576	0.977	0.899	16480	0.985	-0.543	1
ADIRF	-8.46	12	-1.27	0.101	1587	0.977	0.899	16469	0.985	-0.453	1
KLF16	-8.45	12	-1.27	0.101	1591	0.977	0.899	16465	0.985	-0.721	1
OR2H2	-8.46	12	-1.28	0.101	1585	0.977	0.899	16471	0.985	-0.588	1
NR1I3	-8.44	12	-1.27	0.102	1600	0.977	0.898	16456	0.985	-0.493	0.99
CCK	-8.45	12	-1.27	0.102	1594	0.977	0.898	16462	0.985	-0.785	0.99
PNLDC1	-8.47	12	-1.28	0.101	1574	0.977	0.899	16482	0.985	-0.288	1
NAPA	-8.45	12	-1.27	0.102	1593	0.977	0.898	16463	0.985	-0.797	0.99
SAA4	-8.44	12	-1.27	0.102	1596	0.977	0.898	16460	0.985	-0.242	0.99
SPRED3	-8.44	12	-1.27	0.102	1598	0.977	0.898	16458	0.985	-0.345	0.99
TAX1BP3	-8.44	12	-1.27	0.102	1599	0.977	0.898	16457	0.985	-0.529	0.99
NAA20	-8.46	12	-1.28	0.101	1584	0.977	0.899	16472	0.985	-0.763	1
ASTE1	-8.46	12	-1.27	0.101	1588	0.977	0.899	16468	0.985	-0.575	1
HAL	-7.3	9	-1.27	0.102	1607	0.977	0.898	16449	0.985	-0.743	0.99
PMPCA	-8.44	12	-1.27	0.102	1601	0.977	0.898	16455	0.985	-1.169	0.99
MEN1	-8.42	12	-1.27	0.103	1611	0.977	0.897	16445	0.985	-0.513	0.99
OR1A2	-8.43	12	-1.27	0.102	1602	0.977	0.898	16454	0.985	-0.371	0.99
SPATA9	-8.43	12	-1.27	0.102	1604	0.977	0.898	16452	0.985	-0.746	0.99
OR4K5	-8.43	12	-1.27	0.102	1606	0.977	0.898	16450	0.985	-0.655	0.99
CYR61	-8.46	12	-1.28	0.101	1583	0.977	0.899	16473	0.985	-0.622	1
CCDC125	-8.41	12	-1.26	0.103	1616	0.977	0.897	16440	0.985	-0.485	0.99
CLEC4D	-8.44	12	-1.27	0.102	1597	0.977	0.898	16459	0.985	-0.631	0.99
LGALS8	-8.36	12	-1.25	0.105	1653	0.977	0.895	16403	0.985	-0.958	0.98
C11orf86	-8.41	12	-1.26	0.103	1617	0.977	0.897	16439	0.985	-0.6	0.99
MAGOHB	-8.43	12	-1.27	0.102	1608	0.977	0.898	16448	0.985	-0.688	0.99
CNTROB	-8.44	12	-1.27	0.102	1595	0.977	0.898	16461	0.985	-0.603	0.99
ORC1	-8.43	12	-1.27	0.102	1605	0.977	0.898	16451	0.985	-0.975	0.99
FASLG	-8.43	12	-1.27	0.102	1609	0.977	0.898	16447	0.985	-0.655	0.99
WTAP	-8.4	12	-1.26	0.103	1626	0.977	0.897	16430	0.985	-0.582	0.99
RPL35A	-7.28	9	-1.26	0.103	1622	0.977	0.897	16434	0.985	-0.69	0.99
INPP5A	-8.42	12	-1.27	0.103	1615	0.977	0.897	16441	0.985	-0.368	0.99
CCDC126	-8.41	12	-1.26	0.103	1619	0.977	0.897	16437	0.985	-0.599	0.99
VCL	-8.43	12	-1.27	0.102	1603	0.977	0.898	16453	0.985	-0.377	0.99
OSCAR	-8.39	12	-1.26	0.104	1635	0.977	0.896	16421	0.985	-0.289	0.98
AIDA	-8.42	12	-1.27	0.103	1613	0.977	0.897	16443	0.985	-0.23	0.99
TTLL1	-8.41	12	-1.26	0.103	1618	0.977	0.897	16438	0.985	-0.894	0.99
ACTR5	-8.4	12	-1.26	0.103	1628	0.977	0.897	16428	0.985	-0.693	0.99
CCL17	-8.41	12	-1.26	0.103	1623	0.977	0.897	16433	0.985	-0.457	0.99
MOGAT2	-8.38	12	-1.26	0.104	1637	0.977	0.896	16419	0.985	-0.47	0.98
NANOGNB	-8.41	12	-1.26	0.103	1624	0.977	0.897	16432	0.985	-0.152	0.99
RFFL	-8.41	12	-1.26	0.103	1625	0.977	0.897	16431	0.985	-0.43	0.99
GABRG1	-8.41	12	-1.26	0.103	1621	0.977	0.897	16435	0.985	-0.478	0.99
TRIM62	-8.39	12	-1.26	0.104	1633	0.977	0.896	16423	0.985	-0.574	0.98
ATXN7L3	-8.42	12	-1.27	0.103	1614	0.977	0.897	16442	0.985	-0.473	0.99
MTRF1L	-8.4	12	-1.26	0.104	1629	0.977	0.896	16427	0.985	-0.552	0.98
DLG5	-8.4	12	-1.26	0.103	1627	0.977	0.897	16429	0.985	-0.557	0.99
RUFY1	-8.38	12	-1.26	0.105	1642	0.977	0.895	16414	0.985	-0.791	0.98
BAI1	-8.37	12	-1.25	0.105	1651	0.977	0.895	16405	0.985	-0.287	0.98
ARHGEF28	-8.37	12	-1.26	0.105	1643	0.977	0.895	16413	0.985	-0.719	0.98
CRY2	-8.39	12	-1.26	0.104	1632	0.977	0.896	16424	0.985	-0.389	0.98
TNFRSF1B	-8.4	12	-1.26	0.104	1631	0.977	0.896	16425	0.985	-0.44	0.98
LARS	-8.38	12	-1.26	0.104	1638	0.977	0.896	16418	0.985	-0.922	0.98
MATN1	-8.42	12	-1.27	0.103	1612	0.977	0.897	16444	0.985	-0.877	0.99
MAGED2	-8.37	12	-1.25	0.105	1650	0.977	0.895	16406	0.985	-0.588	0.98
FREM1	-8.36	12	-1.25	0.105	1656	0.977	0.895	16400	0.985	-0.396	0.98
UBR2	-8.4	12	-1.26	0.104	1630	0.977	0.896	16426	0.985	-0.669	0.98
G6PC3	-8.37	12	-1.25	0.105	1648	0.977	0.895	16408	0.985	-0.783	0.98
ARHGEF7	-8.37	12	-1.26	0.105	1645	0.977	0.895	16411	0.985	-0.477	0.98
BMP5	-8.37	12	-1.25	0.105	1649	0.977	0.895	16407	0.985	-0.27	0.98
WDR19	-8.38	12	-1.26	0.104	1639	0.977	0.896	16417	0.985	-0.396	0.98
RAB3B	-8.37	12	-1.25	0.105	1647	0.977	0.895	16409	0.985	-0.461	0.98
TNNC2	-8.35	12	-1.25	0.105	1659	0.977	0.895	16397	0.985	-0.402	0.98
SPATA16	-8.35	12	-1.25	0.106	1664	0.977	0.894	16392	0.985	-0.93	0.97
NOD2	-8.38	12	-1.26	0.104	1640	0.977	0.896	16416	0.985	-0.69	0.98
PUSL1	-8.37	12	-1.26	0.105	1644	0.977	0.895	16412	0.985	-0.586	0.98
RDM1	-8.41	12	-1.26	0.103	1620	0.977	0.897	16436	0.985	-0.631	0.99
ETV3	-8.36	12	-1.25	0.105	1658	0.977	0.895	16398	0.985	-0.342	0.98
ALX4	-8.36	12	-1.25	0.105	1655	0.977	0.895	16401	0.985	-0.645	0.98
CEP170	-8.36	12	-1.25	0.105	1652	0.977	0.895	16404	0.985	-0.667	0.98
CATSPER3	-8.37	12	-1.25	0.105	1646	0.977	0.895	16410	0.985	-0.389	0.98
RBCK1	-8.36	12	-1.25	0.105	1657	0.977	0.895	16399	0.985	-0.29	0.98
ACTN2	-8.35	12	-1.25	0.105	1662	0.977	0.895	16394	0.985	-0.711	0.98
PGK2	-8.35	12	-1.25	0.106	1665	0.977	0.894	16391	0.985	-0.397	0.97
MASP2	-8.39	12	-1.26	0.104	1634	0.977	0.896	16422	0.985	-0.388	0.98
SLA	-8.33	12	-1.25	0.106	1673	0.977	0.894	16383	0.985	-0.672	0.97
CLECL1	-8.34	12	-1.25	0.106	1668	0.977	0.894	16388	0.985	-0.392	0.97
USP1	-8.36	12	-1.25	0.105	1654	0.977	0.895	16402	0.985	-0.612	0.98
RNPS1	-8.38	12	-1.26	0.105	1641	0.977	0.895	16415	0.985	-0.921	0.98
FXYD1	-8.33	12	-1.25	0.107	1674	0.977	0.893	16382	0.985	-0.639	0.97
CDKL3	-8.34	12	-1.25	0.106	1670	0.977	0.894	16386	0.985	-0.503	0.97
TAS2R60	-8.33	12	-1.24	0.107	1675	0.977	0.893	16381	0.985	-0.504	0.97
GFM2	-8.35	12	-1.25	0.105	1660	0.977	0.895	16396	0.985	-0.765	0.98
CHMP7	-8.35	12	-1.25	0.105	1661	0.977	0.895	16395	0.985	-0.855	0.98
MRGPRX4	-8.35	12	-1.25	0.106	1666	0.977	0.894	16390	0.985	-0.676	0.97
GRINA	-8.35	12	-1.25	0.106	1667	0.977	0.894	16389	0.985	0.042	0.97
QTRT1	-8.38	12	-1.26	0.104	1636	0.977	0.896	16420	0.985	-0.923	0.98
ZAR1L	-8.32	12	-1.24	0.107	1678	0.977	0.893	16378	0.984	-0.609	0.97
CYB5R4	-8.34	12	-1.25	0.106	1669	0.977	0.894	16387	0.985	-0.549	0.97
PRG3	-8.33	12	-1.25	0.106	1672	0.977	0.894	16384	0.985	-0.569	0.97
OCEL1	-8.32	12	-1.24	0.107	1677	0.977	0.893	16379	0.984	-0.538	0.97
TAAR1	-8.31	12	-1.24	0.107	1679	0.977	0.893	16377	0.984	-0.499	0.97
ZNF433	-8.33	12	-1.25	0.106	1671	0.977	0.894	16385	0.985	-0.632	0.97
OR7A10	-5.91	6	-1.25	0.105	1663	0.977	0.895	16393	0.985	-0.463	0.98
GDF5	-8.32	12	-1.24	0.107	1676	0.977	0.893	16380	0.984	-0.669	0.97
ZNFX1	-8.31	12	-1.24	0.107	1680	0.977	0.893	16376	0.984	-0.497	0.97
TTC18	-8.29	12	-1.24	0.108	1686	0.977	0.892	16370	0.984	-0.491	0.97
SLC30A1	-8.3	12	-1.24	0.108	1682	0.977	0.892	16374	0.984	-0.381	0.97
WHSC1L1	-8.27	12	-1.23	0.109	1703	0.977	0.891	16353	0.984	-0.526	0.96
DSCC1	-8.28	12	-1.23	0.109	1694	0.977	0.891	16362	0.984	-0.615	0.96
KHDC1L	-8.28	12	-1.23	0.109	1692	0.977	0.891	16364	0.984	-0.454	0.96
TMEM209	-8.29	12	-1.24	0.108	1688	0.977	0.892	16368	0.984	-0.529	0.97
GON4L	-8.26	12	-1.23	0.109	1705	0.977	0.891	16351	0.983	-0.749	0.96
LSM5	-7.18	9	-1.24	0.108	1684	0.977	0.892	16372	0.984	-1.322	0.97
PEA15	-8.29	12	-1.24	0.108	1687	0.977	0.892	16369	0.984	-0.43	0.97
BRF2	-8.29	12	-1.24	0.108	1689	0.977	0.892	16367	0.984	-1.056	0.97
DLL3	-8.28	12	-1.23	0.109	1696	0.977	0.891	16360	0.984	-0.583	0.96
FOXK2	-8.29	12	-1.24	0.108	1685	0.977	0.892	16371	0.984	-0.838	0.97
KRTAP29-1	-8.28	12	-1.23	0.109	1691	0.977	0.891	16365	0.984	-0.397	0.96
MB21D1	-8.28	12	-1.23	0.109	1695	0.977	0.891	16361	0.984	-0.696	0.96
RNASE9	-8.3	12	-1.24	0.108	1683	0.977	0.892	16373	0.984	-0.748	0.97
SCAI	-8.26	12	-1.23	0.109	1706	0.977	0.891	16350	0.983	-0.411	0.96
POU4F3	-8.25	12	-1.23	0.11	1711	0.977	0.89	16345	0.983	-0.674	0.96
MORN2	-7.17	9	-1.23	0.109	1698	0.977	0.891	16358	0.984	-1	0.96
DRG1	-8.26	12	-1.23	0.11	1709	0.977	0.89	16347	0.983	-0.44	0.96
AUP1	-8.28	12	-1.24	0.108	1690	0.977	0.892	16366	0.984	-0.342	0.97
HOXA1	-8.3	12	-1.24	0.108	1681	0.977	0.892	16375	0.984	-0.578	0.97
SWSAP1	-8.26	12	-1.23	0.109	1704	0.977	0.891	16352	0.983	-0.72	0.96
PDCD6	-8.28	12	-1.23	0.109	1693	0.977	0.891	16363	0.984	-0.275	0.96
DUT	-8.24	12	-1.22	0.11	1716	0.977	0.89	16340	0.983	-0.764	0.96
ZNF549	-8.27	12	-1.23	0.109	1699	0.977	0.891	16357	0.984	-0.769	0.96
MPDU1	-8.26	12	-1.23	0.11	1710	0.977	0.89	16346	0.983	-0.597	0.96
RLIM	-8.26	12	-1.23	0.109	1708	0.977	0.891	16348	0.983	-0.592	0.96
TPH1	-8.24	12	-1.22	0.11	1715	0.977	0.89	16341	0.983	-0.737	0.96
ZSWIM3	-8.28	12	-1.23	0.109	1697	0.977	0.891	16359	0.984	-0.694	0.96
CTNND1	-8.27	12	-1.23	0.109	1700	0.977	0.891	16356	0.984	-0.436	0.96
KIAA1239	-7.13	9	-1.22	0.111	1719	0.977	0.889	16337	0.983	-0.506	0.95
ORC6	-8.27	12	-1.23	0.109	1702	0.977	0.891	16354	0.984	-0.712	0.96
AP4B1	-8.25	12	-1.23	0.11	1712	0.977	0.89	16344	0.983	-0.403	0.96
SERPINA1	-8.24	12	-1.23	0.11	1713	0.977	0.89	16343	0.983	-0.685	0.96
CBY3	-8.23	12	-1.22	0.111	1721	0.977	0.889	16335	0.983	-0.452	0.95
MTNR1B	-8.23	12	-1.22	0.111	1718	0.977	0.889	16338	0.983	-0.349	0.95
ITFG2	-8.21	12	-1.22	0.111	1732	0.977	0.889	16324	0.983	-0.312	0.95
TBPL1	-8.24	12	-1.23	0.11	1714	0.977	0.89	16342	0.983	-0.627	0.96
MMP2	-8.23	12	-1.22	0.111	1723	0.977	0.889	16333	0.983	-0.19	0.95
CLEC4M	-8.23	12	-1.22	0.111	1720	0.977	0.889	16336	0.983	-0.459	0.95
HARS	-8.23	12	-1.22	0.11	1717	0.977	0.89	16339	0.983	-0.77	0.96
ARL5A	-7.16	9	-1.23	0.109	1701	0.977	0.891	16355	0.984	-0.619	0.96
LYRM4	-8.22	12	-1.22	0.111	1728	0.977	0.889	16328	0.983	-1	0.95
WIPI2	-8.26	12	-1.23	0.109	1707	0.977	0.891	16349	0.983	-0.746	0.96
CDCA3	-8.21	12	-1.22	0.111	1733	0.977	0.889	16323	0.983	-0.588	0.95
TAAR8	-8.21	12	-1.22	0.111	1735	0.977	0.889	16321	0.983	-0.645	0.95
SNAP23	-8.21	12	-1.22	0.111	1734	0.977	0.889	16322	0.983	-0.116	0.95
GNAT1	-8.23	12	-1.22	0.111	1724	0.977	0.889	16332	0.983	-0.531	0.95
MYO1A	-8.22	12	-1.22	0.111	1731	0.977	0.889	16325	0.983	-0.519	0.95
GDF6	-8.19	12	-1.21	0.112	1746	0.977	0.888	16310	0.982	-0.484	0.95
SETD2	-8.22	12	-1.22	0.111	1726	0.977	0.889	16330	0.983	-0.763	0.95
BHMT	-8.19	12	-1.21	0.113	1752	0.977	0.887	16304	0.982	-0.237	0.95
CES3	-8.2	12	-1.22	0.112	1742	0.977	0.888	16314	0.982	-0.492	0.95
F2	-8.22	12	-1.22	0.111	1729	0.977	0.889	16327	0.983	-0.554	0.95
TRMT13	-8.21	12	-1.22	0.112	1736	0.977	0.888	16320	0.983	-0.676	0.95
ENTHD1	-8.23	12	-1.22	0.111	1722	0.977	0.889	16334	0.983	-0.436	0.95
DMRT2	-8.19	12	-1.21	0.112	1745	0.977	0.888	16311	0.982	-0.63	0.95
PNPLA6	-8.22	12	-1.22	0.111	1727	0.977	0.889	16329	0.983	-0.305	0.95
CAPN1	-8.2	12	-1.22	0.112	1740	0.977	0.888	16316	0.982	-0.424	0.95
MARCH2	-8.19	12	-1.21	0.112	1744	0.977	0.888	16312	0.982	-0.528	0.95
POLR3C	-8.22	12	-1.22	0.111	1730	0.977	0.889	16326	0.983	-1.058	0.95
SIRPG	-8.17	12	-1.21	0.113	1766	0.977	0.887	16290	0.982	-0.104	0.95
GPATCH3	-8.18	12	-1.21	0.113	1759	0.977	0.887	16297	0.982	-0.6	0.95
OR51E1	-8.2	12	-1.22	0.112	1738	0.977	0.888	16318	0.982	-0.306	0.95
ZCCHC17	-8.22	12	-1.22	0.111	1725	0.977	0.889	16331	0.983	-0.512	0.95
KIAA1147	-7.47	10	-1.21	0.113	1757	0.977	0.887	16299	0.982	-0.407	0.95
CDK5RAP2	-8.19	12	-1.21	0.112	1743	0.977	0.888	16313	0.982	-0.669	0.95
AKAP11	-8.18	12	-1.21	0.113	1762	0.977	0.887	16294	0.982	-0.489	0.95
CATSPERG	-8.18	12	-1.21	0.113	1758	0.977	0.887	16298	0.982	-0.234	0.95
STX19	-8.2	12	-1.22	0.112	1739	0.977	0.888	16317	0.982	-0.584	0.95
TBCB	-8.19	12	-1.21	0.112	1748	0.977	0.888	16308	0.982	-0.699	0.95
C14orf166	-8.2	12	-1.22	0.112	1741	0.977	0.888	16315	0.982	-0.6	0.95
ST8SIA4	-8.18	12	-1.21	0.113	1760	0.977	0.887	16296	0.982	-0.565	0.95
SRXN1	-8.18	12	-1.21	0.113	1756	0.977	0.887	16300	0.982	-0.752	0.95
RGS7	-8.18	12	-1.21	0.113	1754	0.977	0.887	16302	0.982	-0.122	0.95
LMAN2	-8.19	12	-1.21	0.112	1751	0.977	0.888	16305	0.982	-0.355	0.95
PCNX	-8.19	12	-1.21	0.112	1749	0.977	0.888	16307	0.982	-0.378	0.95
FGFRL1	-8.19	12	-1.21	0.112	1747	0.977	0.888	16309	0.982	-0.503	0.95
NCAPG	-8.19	12	-1.21	0.112	1750	0.977	0.888	16306	0.982	-0.526	0.95
METTL15	-8.19	12	-1.21	0.113	1753	0.977	0.887	16303	0.982	-0.446	0.95
ZNF709	-5.79	6	-1.21	0.113	1755	0.977	0.887	16301	0.982	-0.326	0.95
CASP6	-8.17	12	-1.21	0.113	1764	0.977	0.887	16292	0.982	-0.493	0.95
FAM35A	-8.16	12	-1.21	0.114	1768	0.977	0.886	16288	0.982	-0.558	0.94
RBBP8	-8.18	12	-1.21	0.113	1763	0.977	0.887	16293	0.982	-0.381	0.95
GMPS	-8.16	12	-1.21	0.114	1769	0.977	0.886	16287	0.982	-0.856	0.94
EIF5B	-8.17	12	-1.21	0.113	1767	0.977	0.887	16289	0.982	-0.495	0.95
C5orf51	-8.16	12	-1.21	0.114	1773	0.977	0.886	16283	0.982	-0.495	0.94
ZNRF4	-8.2	12	-1.22	0.112	1737	0.977	0.888	16319	0.982	-0.354	0.95
ANKFY1	-8.13	12	-1.2	0.115	1790	0.977	0.885	16266	0.982	-0.277	0.94
CRMP1	-8.14	12	-1.2	0.114	1782	0.977	0.886	16274	0.982	-0.601	0.94
CYHR1	-8.18	12	-1.21	0.113	1761	0.977	0.887	16295	0.982	-0.364	0.95
PSMD14	-8.16	12	-1.21	0.114	1770	0.977	0.886	16286	0.982	-1.56	0.94
KEL	-8.15	12	-1.2	0.114	1781	0.977	0.886	16275	0.982	-0.437	0.94
LINS	-8.15	12	-1.21	0.114	1776	0.977	0.886	16280	0.982	-0.199	0.94
CHAD	-8.14	12	-1.2	0.115	1787	0.977	0.885	16269	0.982	-0.703	0.94
HRASLS5	-8.15	12	-1.21	0.114	1779	0.977	0.886	16277	0.982	-0.298	0.94
MCOLN1	-8.16	12	-1.21	0.114	1774	0.977	0.886	16282	0.982	-0.242	0.94
ZFP36L1	-8.17	12	-1.21	0.113	1765	0.977	0.887	16291	0.982	-0.235	0.95
PSTPIP2	-8.16	12	-1.21	0.114	1772	0.977	0.886	16284	0.982	-0.797	0.94
ASPHD2	-8.14	12	-1.2	0.114	1783	0.977	0.886	16273	0.982	-0.367	0.94
TGFBR3	-8.13	12	-1.2	0.115	1793	0.977	0.885	16263	0.982	-0.381	0.94
LDB1	-8.14	12	-1.2	0.115	1786	0.977	0.885	16270	0.982	-0.397	0.94
GAB2	-8.16	12	-1.21	0.114	1771	0.977	0.886	16285	0.982	-0.6	0.94
SSH3	-8.15	12	-1.21	0.114	1777	0.977	0.886	16279	0.982	-0.522	0.94
ANO1	-8.1	12	-1.19	0.117	1808	0.977	0.883	16248	0.982	-0.515	0.93
PHOX2A	-8.14	12	-1.2	0.115	1788	0.977	0.885	16268	0.982	-0.477	0.94
C11orf68	-8.15	12	-1.2	0.114	1780	0.977	0.886	16276	0.982	-0.56	0.94
ANTXR1	-8.13	12	-1.2	0.115	1792	0.977	0.885	16264	0.982	-0.396	0.94
MAG	-8.16	12	-1.21	0.114	1775	0.977	0.886	16281	0.982	-0.479	0.94
EFNA5	-8.13	12	-1.2	0.115	1791	0.977	0.885	16265	0.982	-0.6	0.94
B4GALT5	-8.12	12	-1.2	0.116	1797	0.977	0.884	16259	0.982	-0.416	0.94
CCDC88C	-8.14	12	-1.2	0.115	1789	0.977	0.885	16267	0.982	-0.411	0.94
AMD1	-8.15	12	-1.21	0.114	1778	0.977	0.886	16278	0.982	-0.564	0.94
FRMD4A	-8.12	12	-1.2	0.116	1795	0.977	0.884	16261	0.982	-0.568	0.94
WDR62	-8.12	12	-1.2	0.116	1796	0.977	0.884	16260	0.982	-0.607	0.94
AFAP1L1	-8.11	12	-1.2	0.116	1798	0.977	0.884	16258	0.982	-0.954	0.94
ZFP62	-8.11	12	-1.19	0.116	1800	0.977	0.884	16256	0.982	-0.381	0.94
LDHC	-8.11	12	-1.2	0.116	1799	0.977	0.884	16257	0.982	-0.505	0.94
ALOX12B	-8.1	12	-1.19	0.116	1805	0.977	0.884	16251	0.982	-0.299	0.94
NFATC1	-7.39	10	-1.19	0.116	1806	0.977	0.884	16250	0.982	-0.365	0.94
PRKRIR	-7.05	9	-1.2	0.115	1784	0.977	0.885	16272	0.982	-0.652	0.94
PSMC1	-8.14	12	-1.2	0.115	1785	0.977	0.885	16271	0.982	-0.649	0.94
RHOXF1	-8.1	12	-1.19	0.117	1809	0.977	0.883	16247	0.982	-0.53	0.93
H6PD	-8.1	12	-1.19	0.116	1804	0.977	0.884	16252	0.982	-0.412	0.94
LRPAP1	-8.09	12	-1.19	0.117	1814	0.977	0.883	16242	0.982	-0.381	0.93
TRIP4	-8.1	12	-1.19	0.116	1803	0.977	0.884	16253	0.982	-0.268	0.94
PSMA7	-7.39	10	-1.19	0.117	1810	0.977	0.883	16246	0.982	-1.261	0.93
TPPP3	-8.11	12	-1.19	0.116	1801	0.977	0.884	16255	0.982	-0.352	0.94
TMEM249	-8.08	12	-1.19	0.117	1816	0.977	0.883	16240	0.981	-0.62	0.93
TMEM150A	-8.13	12	-1.2	0.115	1794	0.977	0.885	16262	0.982	-0.922	0.94
CYP2F1	-8.08	12	-1.19	0.117	1818	0.977	0.883	16238	0.981	-0.335	0.93
FUT4	-8.08	12	-1.19	0.117	1819	0.977	0.883	16237	0.981	-0.507	0.93
POP1	-7	9	-1.19	0.117	1812	0.977	0.883	16244	0.982	-0.468	0.93
SCAMP4	-8.09	12	-1.19	0.117	1815	0.977	0.883	16241	0.982	-0.451	0.93
NRN1L	-8.08	12	-1.19	0.117	1822	0.977	0.883	16234	0.981	-0.915	0.93
FAM19A1	-8.09	12	-1.19	0.117	1811	0.977	0.883	16245	0.982	-0.452	0.93
RSPH6A	-8.09	12	-1.19	0.117	1813	0.977	0.883	16243	0.982	-0.156	0.93
C3orf18	-8.08	12	-1.19	0.117	1817	0.977	0.883	16239	0.981	-0.229	0.93
DYRK3	-8.06	12	-1.19	0.118	1828	0.977	0.882	16228	0.981	-0.682	0.93
PXDNL	-8.08	12	-1.19	0.117	1820	0.977	0.883	16236	0.981	-0.399	0.93
IFITM5	-8.07	12	-1.19	0.118	1823	0.977	0.882	16233	0.981	-0.471	0.93
NDUFB10	-8.1	12	-1.19	0.117	1807	0.977	0.883	16249	0.982	-0.544	0.93
HSPA8	-8.07	12	-1.19	0.118	1825	0.977	0.882	16231	0.981	-0.44	0.93
ZNF384	-8.1	12	-1.19	0.116	1802	0.977	0.884	16254	0.982	-0.581	0.94
LPAR5	-8.04	12	-1.18	0.119	1839	0.977	0.881	16217	0.981	-0.552	0.92
MYO7A	-8.08	12	-1.19	0.117	1821	0.977	0.883	16235	0.981	-0.373	0.93
RAB41	-8.05	12	-1.18	0.119	1834	0.977	0.881	16222	0.981	-0.423	0.92
ZFYVE28	-8.06	12	-1.18	0.118	1829	0.977	0.882	16227	0.981	-0.309	0.93
PXDC1	-8.07	12	-1.19	0.118	1824	0.977	0.882	16232	0.981	-0.323	0.93
DENND2D	-8.07	12	-1.19	0.118	1827	0.977	0.882	16229	0.981	-0.425	0.93
EFCAB10	-8.07	12	-1.19	0.118	1826	0.977	0.882	16230	0.981	-0.502	0.93
LYPD4	-8.04	12	-1.18	0.119	1846	0.977	0.881	16210	0.981	-0.577	0.92
TUBA4A	-8.05	12	-1.18	0.119	1833	0.977	0.881	16223	0.981	-0.528	0.92
PMM2	-8.06	12	-1.18	0.118	1830	0.977	0.882	16226	0.981	-0.42	0.93
MSTO1	-8.04	12	-1.18	0.119	1842	0.977	0.881	16214	0.981	-0.939	0.92
C1orf162	-8.05	12	-1.18	0.119	1836	0.977	0.881	16220	0.981	-0.456	0.92
ZMYND15	-8.05	12	-1.18	0.119	1837	0.977	0.881	16219	0.981	-0.46	0.92
NLRC4	-8.03	12	-1.18	0.12	1851	0.977	0.88	16205	0.981	-0.631	0.92
STPG2	-8.03	12	-1.18	0.119	1848	0.977	0.881	16208	0.981	-0.132	0.92
DNAH12	-8.04	12	-1.18	0.119	1845	0.977	0.881	16211	0.981	-0.596	0.92
RPP30	-8.05	12	-1.18	0.118	1832	0.977	0.882	16224	0.981	-0.64	0.93
ST7L	-7.31	10	-1.17	0.121	1864	0.977	0.879	16192	0.981	-0.595	0.92
SLAMF6	-8.02	12	-1.17	0.12	1857	0.977	0.88	16199	0.981	-0.465	0.92
FUT3	-8.03	12	-1.18	0.12	1852	0.977	0.88	16204	0.981	-0.323	0.92
ATG10	-8.03	12	-1.18	0.119	1849	0.977	0.881	16207	0.981	-0.626	0.92
PMP22	-8.06	12	-1.18	0.118	1831	0.977	0.882	16225	0.981	-0.752	0.93
MYSM1	-8.03	12	-1.18	0.12	1850	0.977	0.88	16206	0.981	-0.597	0.92
FAM124A	-8.05	12	-1.18	0.119	1835	0.977	0.881	16221	0.981	-0.609	0.92
TXNDC15	-8.01	12	-1.17	0.12	1860	0.977	0.88	16196	0.981	-0.229	0.92
TMEM217	-8.04	12	-1.18	0.119	1843	0.977	0.881	16213	0.981	-0.554	0.92
DDX46	-7.68	11	-1.18	0.12	1853	0.977	0.88	16203	0.981	-1.288	0.92
ALG14	-8.02	12	-1.18	0.12	1854	0.977	0.88	16202	0.981	-0.763	0.92
SLC27A3	-8.02	12	-1.17	0.12	1858	0.977	0.88	16198	0.981	-0.437	0.92
PRKAR1A	-8.04	12	-1.18	0.119	1841	0.977	0.881	16215	0.981	-0.929	0.92
SMYD1	-8.01	12	-1.17	0.121	1865	0.977	0.879	16191	0.981	-0.801	0.92
DHX29	-8.01	12	-1.17	0.12	1863	0.977	0.88	16193	0.981	-0.289	0.92
SRD5A3	-8.05	12	-1.18	0.119	1838	0.977	0.881	16218	0.981	-0.788	0.92
BANF1	-8.04	12	-1.18	0.119	1844	0.977	0.881	16212	0.981	-1.985	0.92
CIRBP	-7.99	12	-1.17	0.121	1875	0.977	0.879	16181	0.981	-0.397	0.92
GPR22	-8.01	12	-1.17	0.12	1861	0.977	0.88	16195	0.981	-0.114	0.92
HSPB3	-8.04	12	-1.18	0.119	1847	0.977	0.881	16209	0.981	-0.325	0.92
OR9G1	-7.99	12	-1.17	0.121	1876	0.977	0.879	16180	0.981	-0.346	0.92
TIAM2	-7.99	12	-1.17	0.121	1879	0.977	0.879	16177	0.981	-0.609	0.92
PLEKHG6	-7.96	12	-1.16	0.123	1898	0.977	0.877	16158	0.98	-0.725	0.91
CERS2	-8	12	-1.17	0.121	1868	0.977	0.879	16188	0.981	-0.461	0.92
DUSP11	-8.02	12	-1.17	0.12	1859	0.977	0.88	16197	0.981	-0.544	0.92
ZNF669	-8	12	-1.17	0.121	1871	0.977	0.879	16185	0.981	-0.585	0.92
AGMAT	-8.02	12	-1.18	0.12	1855	0.977	0.88	16201	0.981	-0.428	0.92
NUDT17	-8	12	-1.17	0.121	1874	0.977	0.879	16182	0.981	-0.835	0.92
CLCN6	-7.99	12	-1.17	0.121	1883	0.977	0.879	16173	0.981	-0.275	0.92
ATG13	-8	12	-1.17	0.121	1872	0.977	0.879	16184	0.981	-0.416	0.92
PTPRJ	-8	12	-1.17	0.121	1870	0.977	0.879	16186	0.981	-0.673	0.92
ADGB	-7.99	12	-1.17	0.121	1877	0.977	0.879	16179	0.981	-0.693	0.92
DDX54	-8.02	12	-1.17	0.12	1856	0.977	0.88	16200	0.981	-0.373	0.92
PLS3	-8.01	12	-1.17	0.121	1866	0.977	0.879	16190	0.981	-0.509	0.92
ZNF131	-7.97	12	-1.16	0.122	1890	0.977	0.878	16166	0.98	-0.737	0.91
HOXB6	-8.01	12	-1.17	0.12	1862	0.977	0.88	16194	0.981	-0.113	0.92
KLHL12	-7.97	12	-1.16	0.122	1892	0.977	0.878	16164	0.98	-0.524	0.91
CYTH2	-7.98	12	-1.17	0.122	1885	0.977	0.878	16171	0.981	-0.394	0.91
PTTG1IP	-7.99	12	-1.17	0.121	1880	0.977	0.879	16176	0.981	-0.33	0.92
CHRM1	-7.99	12	-1.17	0.121	1878	0.977	0.879	16178	0.981	-0.534	0.92
PEX16	-7.98	12	-1.17	0.122	1889	0.977	0.878	16167	0.981	-0.482	0.91
APOBEC1	-8	12	-1.17	0.121	1869	0.977	0.879	16187	0.981	-0.494	0.92
AIM1L	-7.98	12	-1.17	0.122	1886	0.977	0.878	16170	0.981	-0.259	0.91
MYBPH	-8	12	-1.17	0.121	1873	0.977	0.879	16183	0.981	-0.534	0.92
PPP1R42	-7.97	12	-1.16	0.122	1893	0.977	0.878	16163	0.98	-0.473	0.91
WNK1	-7.95	12	-1.16	0.123	1910	0.977	0.877	16146	0.98	-0.38	0.91
RPP25	-8	12	-1.17	0.121	1867	0.977	0.879	16189	0.981	-0.601	0.92
MYADM	-7.99	12	-1.17	0.121	1881	0.977	0.879	16175	0.981	-0.68	0.92
VDAC2	-7.99	12	-1.17	0.121	1882	0.977	0.879	16174	0.981	-0.456	0.92
TAP2	-7.97	12	-1.16	0.122	1895	0.977	0.878	16161	0.98	-0.658	0.91
MMP25	-7.98	12	-1.17	0.122	1888	0.977	0.878	16168	0.981	-0.613	0.91
MASTL	-7.98	12	-1.17	0.122	1887	0.977	0.878	16169	0.981	-0.793	0.91
DRG2	-7.95	12	-1.16	0.123	1912	0.977	0.877	16144	0.98	-0.284	0.91
LRRC8E	-7.96	12	-1.16	0.123	1899	0.977	0.877	16157	0.98	-0.627	0.91
ZNF284	-7.97	12	-1.16	0.122	1891	0.977	0.878	16165	0.98	-0.583	0.91
SYCN	-7.96	12	-1.16	0.123	1896	0.977	0.877	16160	0.98	-0.416	0.91
ZIK1	-7.99	12	-1.17	0.122	1884	0.977	0.878	16172	0.981	-0.834	0.91
RAD50	-7.26	10	-1.16	0.123	1904	0.977	0.877	16152	0.98	-0.553	0.91
BBS1	-7.94	12	-1.16	0.124	1919	0.977	0.876	16137	0.98	-0.374	0.91
GABRA3	-7.96	12	-1.16	0.123	1902	0.977	0.877	16154	0.98	-0.328	0.91
USP18	-7.95	12	-1.16	0.123	1913	0.977	0.877	16143	0.98	-0.611	0.91
SSBP4	-7.96	12	-1.16	0.123	1908	0.977	0.877	16148	0.98	-0.486	0.91
YPEL2	-7.94	12	-1.16	0.124	1918	0.977	0.876	16138	0.98	-0.397	0.91
EFHD2	-7.96	12	-1.16	0.123	1900	0.977	0.877	16156	0.98	-0.325	0.91
WDYHV1	-7.96	12	-1.16	0.123	1901	0.977	0.877	16155	0.98	-0.283	0.91
ELAVL1	-7.97	12	-1.16	0.122	1894	0.977	0.878	16162	0.98	-0.679	0.91
TMEM50A	-7.93	12	-1.16	0.124	1921	0.977	0.876	16135	0.98	-0.299	0.91
INTS9	-7.95	12	-1.16	0.123	1911	0.977	0.877	16145	0.98	-1.278	0.91
OGFR	-7.96	12	-1.16	0.123	1897	0.977	0.877	16159	0.98	-0.422	0.91
RARS2	-7.96	12	-1.16	0.123	1905	0.977	0.877	16151	0.98	-0.681	0.91
VTCN1	-7.96	12	-1.16	0.123	1903	0.977	0.877	16153	0.98	-0.48	0.91
WEE2	-7.96	12	-1.16	0.123	1909	0.977	0.877	16147	0.98	-0.364	0.91
CLIC6	-7.94	12	-1.16	0.124	1916	0.977	0.876	16140	0.98	-0.458	0.91
OR5J2	-7.95	12	-1.16	0.123	1914	0.977	0.877	16142	0.98	-0.455	0.91
UPF2	-7.93	12	-1.15	0.124	1923	0.977	0.876	16133	0.98	-0.403	0.91
CD27	-7.94	12	-1.16	0.124	1917	0.977	0.876	16139	0.98	-0.272	0.91
GYG2	-7.96	12	-1.16	0.123	1907	0.977	0.877	16149	0.98	-0.19	0.91
DEDD2	-7.57	11	-1.15	0.125	1933	0.977	0.875	16123	0.98	-0.732	0.9
APOL3	-7.93	12	-1.15	0.124	1922	0.977	0.876	16134	0.98	-0.45	0.91
KEAP1	-7.91	12	-1.15	0.125	1937	0.977	0.875	16119	0.98	-0.328	0.9
ZIC4	-7.91	12	-1.15	0.125	1938	0.977	0.875	16118	0.98	-0.743	0.9
TMEM14E	-7.95	12	-1.16	0.123	1915	0.977	0.877	16141	0.98	-0.283	0.91
ULBP3	-7.92	12	-1.15	0.125	1926	0.977	0.875	16130	0.98	-0.487	0.9
C16orf80	-7.92	12	-1.15	0.125	1927	0.977	0.875	16129	0.98	-0.328	0.9
FCER2	-7.91	12	-1.15	0.125	1936	0.977	0.875	16120	0.98	-0.706	0.9
ST3GAL3	-7.59	11	-1.15	0.124	1924	0.977	0.876	16132	0.98	-0.913	0.91
SYT2	-7.92	12	-1.15	0.125	1925	0.977	0.875	16131	0.98	-0.367	0.9
DHODH	-7.89	12	-1.15	0.126	1950	0.977	0.874	16106	0.98	-0.394	0.9
WASL	-7.96	12	-1.16	0.123	1906	0.977	0.877	16150	0.98	-0.237	0.91
RD3	-7.9	12	-1.15	0.126	1944	0.977	0.874	16112	0.98	-0.318	0.9
CACUL1	-7.91	12	-1.15	0.125	1935	0.977	0.875	16121	0.98	-0.628	0.9
STMN3	-7.89	12	-1.15	0.126	1947	0.977	0.874	16109	0.98	-0.526	0.9
PRSS50	-7.89	12	-1.15	0.126	1951	0.977	0.874	16105	0.98	-0.423	0.9
C3orf83	-7.93	12	-1.16	0.124	1920	0.977	0.876	16136	0.98	-0.489	0.91
ELP4	-7.92	12	-1.15	0.125	1930	0.977	0.875	16126	0.98	-0.606	0.9
RSPH4A	-7.9	12	-1.15	0.125	1940	0.977	0.875	16116	0.98	-0.491	0.9
TUBB3	-7.91	12	-1.15	0.125	1934	0.977	0.875	16122	0.98	-0.465	0.9
COG8	-7.91	12	-1.15	0.125	1932	0.977	0.875	16124	0.98	-0.489	0.9
VPS25	-7.91	12	-1.15	0.125	1931	0.977	0.875	16125	0.98	-1.36	0.9
OR9A2	-7.89	12	-1.15	0.126	1949	0.977	0.874	16107	0.98	-0.612	0.9
C19orf54	-7.88	12	-1.14	0.126	1957	0.977	0.874	16099	0.98	-0.302	0.9
TNKS2	-7.92	12	-1.15	0.125	1929	0.977	0.875	16127	0.98	-0.313	0.9
GRPEL1	-7.9	12	-1.15	0.126	1943	0.977	0.874	16113	0.98	-1.841	0.9
PARS2	-7.92	12	-1.15	0.125	1928	0.977	0.875	16128	0.98	-0.597	0.9
TCF20	-7.9	12	-1.15	0.125	1939	0.977	0.875	16117	0.98	-0.256	0.9
NCBP2L	-7.89	12	-1.14	0.126	1954	0.977	0.874	16102	0.98	-0.463	0.9
ESRRA	-7.89	12	-1.14	0.126	1955	0.977	0.874	16101	0.98	-0.497	0.9
LRP5	-7.87	12	-1.14	0.127	1964	0.977	0.873	16092	0.98	-0.568	0.9
CTSH	-6.84	9	-1.15	0.126	1945	0.977	0.874	16111	0.98	-0.395	0.9
MORC3	-7.9	12	-1.15	0.125	1941	0.977	0.875	16115	0.98	-0.253	0.9
GGT5	-7.88	12	-1.14	0.127	1962	0.977	0.873	16094	0.98	-0.848	0.9
AKR1C4	-5.58	6	-1.14	0.126	1956	0.977	0.874	16100	0.98	-0.381	0.9
RGS22	-7.9	12	-1.15	0.126	1946	0.977	0.874	16110	0.98	-0.678	0.9
CHMP2A	-7.89	12	-1.15	0.126	1948	0.977	0.874	16108	0.98	-0.845	0.9
SHC1	-7.88	12	-1.14	0.127	1960	0.977	0.873	16096	0.98	-0.795	0.9
SNRPA	-7.88	12	-1.14	0.127	1961	0.977	0.873	16095	0.98	-0.271	0.9
DCAF17	-7.86	12	-1.14	0.128	1976	0.977	0.872	16080	0.98	-0.458	0.89
TMEM151A	-7.87	12	-1.14	0.127	1968	0.977	0.873	16088	0.98	-0.219	0.9
NEUROG1	-7.86	12	-1.14	0.127	1975	0.977	0.873	16081	0.98	-0.598	0.9
C17orf89	-7.88	12	-1.14	0.126	1958	0.977	0.874	16098	0.98	-0.554	0.9
LCE4A	-6.82	9	-1.14	0.127	1963	0.977	0.873	16093	0.98	-0.857	0.9
STT3A	-7.89	12	-1.15	0.126	1952	0.977	0.874	16104	0.98	-0.908	0.9
SAC3D1	-7.87	12	-1.14	0.127	1967	0.977	0.873	16089	0.98	-0.656	0.9
TBC1D1	-7.86	12	-1.14	0.127	1970	0.977	0.873	16086	0.98	-0.549	0.9
LAMP2	-7.86	12	-1.14	0.127	1973	0.977	0.873	16083	0.98	-0.502	0.9
EPRS	-7.86	12	-1.14	0.128	1977	0.977	0.872	16079	0.98	-0.724	0.89
CBLL1	-7.86	12	-1.14	0.127	1971	0.977	0.873	16085	0.98	-0.766	0.9
C6orf201	-7.87	12	-1.14	0.127	1965	0.977	0.873	16091	0.98	-0.775	0.9
KRT34	-7.84	12	-1.13	0.128	1987	0.977	0.872	16069	0.979	-0.582	0.89
ZNF630	-7.89	12	-1.15	0.126	1953	0.977	0.874	16103	0.98	-0.027	0.9
KLF3	-7.86	12	-1.14	0.127	1974	0.977	0.873	16082	0.98	-0.36	0.9
CELF1	-7.87	12	-1.14	0.127	1969	0.977	0.873	16087	0.98	-0.467	0.9
WDR34	-7.85	12	-1.14	0.128	1982	0.977	0.872	16074	0.98	-0.596	0.89
OOEP	-7.88	12	-1.14	0.126	1959	0.977	0.874	16097	0.98	-0.466	0.9
MAN2A2	-7.86	12	-1.14	0.127	1972	0.977	0.873	16084	0.98	-0.422	0.9
CBX7	-7.86	12	-1.14	0.128	1978	0.977	0.872	16078	0.98	-0.44	0.89
KIAA1210	-7.85	12	-1.14	0.128	1984	0.977	0.872	16072	0.979	-0.189	0.89
OR4C15	-7.9	12	-1.15	0.126	1942	0.977	0.874	16114	0.98	-0.778	0.9
TPMT	-7.87	12	-1.14	0.127	1966	0.977	0.873	16090	0.98	-0.405	0.9
DHX58	-7.85	12	-1.14	0.128	1983	0.977	0.872	16073	0.979	-0.414	0.89
WDR16	-7.83	12	-1.13	0.129	1991	0.977	0.871	16065	0.979	-0.398	0.89
COMT	-7.85	12	-1.14	0.128	1981	0.977	0.872	16075	0.98	-0.989	0.89
SRP14	-7.86	12	-1.14	0.128	1979	0.977	0.872	16077	0.98	-1.212	0.89
PAMR1	-7.85	12	-1.14	0.128	1985	0.977	0.872	16071	0.979	-0.454	0.89
ZXDC	-7.82	12	-1.13	0.129	1996	0.977	0.871	16060	0.979	-0.607	0.89
CADM4	-7.81	12	-1.13	0.13	2002	0.977	0.87	16054	0.979	-0.458	0.89
HLA-DRA	-7.8	12	-1.12	0.13	2021	0.977	0.87	16035	0.979	-0.28	0.89
CMTR1	-7.8	12	-1.12	0.13	2018	0.977	0.87	16038	0.979	-0.842	0.89
SRF	-7.84	12	-1.14	0.128	1986	0.977	0.872	16070	0.979	-0.734	0.89
WDR44	-7.85	12	-1.14	0.128	1980	0.977	0.872	16076	0.98	-0.381	0.89
SERPINF2	-7.82	12	-1.13	0.13	2001	0.977	0.87	16055	0.979	-0.364	0.89
SLC35A4	-7.82	12	-1.13	0.129	1995	0.977	0.871	16061	0.979	-0.375	0.89
HTR1B	-7.81	12	-1.13	0.13	2008	0.977	0.87	16048	0.979	-0.116	0.89
EXOSC5	-7.83	12	-1.13	0.129	1993	0.977	0.871	16063	0.979	-0.894	0.89
MTMR14	-7.83	12	-1.13	0.129	1989	0.977	0.871	16067	0.979	-0.578	0.89
WISP2	-7.8	12	-1.13	0.13	2013	0.977	0.87	16043	0.979	-0.125	0.89
KLK6	-7.83	12	-1.13	0.129	1994	0.977	0.871	16062	0.979	-0.677	0.89
CACNB4	-7.83	12	-1.13	0.129	1992	0.977	0.871	16064	0.979	-0.648	0.89
AGPAT4	-7.8	12	-1.12	0.13	2017	0.977	0.87	16039	0.979	-0.463	0.89
AKAP10	-7.82	12	-1.13	0.129	2000	0.977	0.871	16056	0.979	-0.251	0.89
C1QC	-7.83	12	-1.13	0.129	1990	0.977	0.871	16066	0.979	-0.631	0.89
ZNF512B	-7.84	12	-1.13	0.128	1988	0.977	0.872	16068	0.979	-0.618	0.89
[truncated: 15,823 more rows]

## Sheet: Figure 7c
Experiment	Cell line	Drug	Concentration (nM)	Log10(nM)	Median_viability	SEM	Fluorescence_r1	Fluorescence_r2	Fluorescence_r3	Fluorescence_r4	Viability_r1	Viability_r2	Viability_r3	Viability_r4	Median_viability	SEM		Illudin S	RPE1-iCas9			RPE1-iCas9 CSB-KO (15)			RPE1-iCas9 ELOF1-KO (2-16)			RPE1-iCas9 PTGR1-KO (11)			RPE1-iCas9 CSB -KO (15)/CSA-KO (3-21)			RPE1-iCas9 CSB -KO (15)/ELOF1-KO (2-20)
1	RPE1-iCas9	Phenylarsine oxide	10	1	-2.03752e-06	0.000932752	17535	17167	17140	17563	0.00149758	-0.00150165	-0.00172171	0.00172578	-2.03752e-06	0.000932752		Log10(nM)	Exp_1 mean	Exp_2 mean	Exp_1+2 mean	Exp_1 mean	Exp_2 mean	Exp_1+2 mean	Exp_1 mean	Exp_2 mean	Exp_1+2 mean	Exp_1 mean	Exp_2 mean	Exp_1+2 mean	Exp_1 mean	Exp_2 mean	Exp_1+2 mean	Exp_1 mean	Exp_2 mean	Exp_1+2 mean
1	RPE1-iCas9	Untreated	-	-	1.00909	0.0362851	149693	128174	141984	140346	1.0786	0.903216	1.01577	1.00242	1.00909	0.0362851		-0.75	0.987157	1.02487	1.00601	0.931193	0.987625	0.959409	0.968696	0.988457	0.978577	1.08432	1.00839	1.04635	0.991392	1.00379	0.99759	0.929029	0.965454	0.947241
1	RPE1-iCas9	Illudin S	0.177828	-0.75	0.987157	0.0162604	136997	139950	140889	132020	0.975124	0.999191	1.00684	0.934561	0.987157	0.0162604		-0.5	1.00321	1.01285	1.00803	0.91744	1.05131	0.984376	0.95551	1.01191	0.983708	1.03523	1.0539	1.04456	0.940598	1.01985	0.980226	0.807771	0.955127	0.881449
1	RPE1-iCas9	Illudin S	0.316228	-0.5	1.00321	0.0321311	148148	145130	131293	135755	1.06601	1.04141	0.928636	0.965001	1.00321	0.0321311		-0.25	0.981424	0.995863	0.988643	0.889481	1.07998	0.984729	0.970447	1.01675	0.9936	1.08475	1.06741	1.07608	0.964141	1.02271	0.993427	0.557173	0.935965	0.746569
1	RPE1-iCas9	Illudin S	0.562341	-0.25	0.981424	0.0112774	138074	137512	132360	138028	0.983902	0.979321	0.937332	0.983527	0.981424	0.0112774		0	0.992369	1.00259	0.99748	0.78741	1.02198	0.904694	0.942731	1.01093	0.976832	1.0685	1.0506	1.05955	0.865039	1.00329	0.934164	0.311898	0.751351	0.531625
1	RPE1-iCas9	Illudin S	1	0	0.992369	0.0145899	134486	143226	139426	138800	0.954659	1.02589	0.99492	0.989818	0.992369	0.0145899		0.25	0.904381	1.00949	0.956933	0.502353	0.804575	0.653464	0.861597	0.95466	0.908128	1.04488	1.04381	1.04434	0.719474	0.744506	0.73199	0.116343	0.283751	0.200047
1	RPE1-iCas9	Illudin S	1.77828	0.25	0.904381	0.0221617	122958	135709	130106	126528	0.860705	0.964627	0.918962	0.889801	0.904381	0.0221617		0.5	0.964851	1.00071	0.98278	0.152444	0.152503	0.152474	0.648623	0.642146	0.645384	1.05303	1.05663	1.05483	0.234358	0.181074	0.207716	0.00950827	0.0277038	0.018606
1	RPE1-iCas9	Illudin S	3.16228	0.5	0.964851	0.0157841	136408	139233	135065	129978	0.970323	0.993347	0.959378	0.917918	0.964851	0.0157841		0.75	0.850619	0.997774	0.924197	0.0133212	0.0190986	0.0162099	0.0817331	0.0374394	0.0595862	1.03634	1.04412	1.04023	0.0275819	0.0329404	0.0302612	0.0016185	0.00841714	0.00501782
1	RPE1-iCas9	Illudin S	5.62341	0.75	0.850619	0.0407071	122516	120925	133888	109471	0.857102	0.844136	0.949785	0.750784	0.850619	0.0407071		1	0.779652	1.05479	0.917223	0.0254705	0.0518009	0.0386357	0.00260985	0.00763153	0.00512069	0.994921	1.047	1.02096	0.0161356	0.045481	0.0308083	0.0069426	0.00586313	0.00640287
1	RPE1-iCas9	Illudin S	10	1	0.779652	0.0266586	103620	119076	114770	111256	0.703098	0.829066	0.793972	0.765332	0.779652	0.0266586		1.25	0.523629	0.724121	0.623875	0.0652579	0.12758	0.096419	0.00733486	0.0128741	0.0101045	0.970607	1.11171	1.04116	0.0443599	0.11652	0.0804402	0.0216786	0.0289785	0.0253285
1	RPE1-iCas9	Illudin S	17.7828	1.25	0.523629	0.00899321	83775	81153	78485	82046	0.54136	0.51999	0.498246	0.527268	0.523629	0.00899321		1.5	0.11086	0.15506	0.13296	0.0722617	0.145833	0.109047	0.0261841	0.0382279	0.032206	0.832059	1.13875	0.985407	0.0776921	0.146587	0.112139	0.0330513	0.039855	0.0364531
1	RPE1-iCas9	Illudin S	31.6228	1.5	0.11086	0.0205262	32752	28741	39624	29155	0.125518	0.0928275	0.181525	0.0962016	0.11086	0.0205262		1.75	0.0347133	0.079727	0.0572201	0.0609473	0.130611	0.0957793	0.0511252	0.0743596	0.0627424	0.52401	0.98498	0.754495	0.0665	0.132882	0.0996911	0.0378237	0.0440208	0.0409223
1	RPE1-iCas9	Illudin S	56.2341	1.75	0.0347133	0.00108714	21280	21887	21730	21491	0.0320197	0.0369668	0.0356872	0.0337393	0.0347133	0.00108714		2	0.0602108	0.095828	0.0780194	0.0635183	0.115961	0.0897395	0.0647516	0.0830842	0.0739179	0.187557	0.601911	0.394734	0.0690252	0.113195	0.0911099	0.0332374	0.0467827	0.04001
1	RPE1-iCas9	Illudin S	100	2	0.0602108	0.00387404	24472	25291	25006	23147	0.0580348	0.0647097	0.0623869	0.0472359	0.0602108	0.00387404		2.25	0.0455488	0.0887657	0.0671572	0.0480295	0.0862201	0.0671248	0.0572519	0.0738912	0.0655715	0.093283	0.223399	0.158341	0.0621954	0.0925418	0.0773686	0.0238189	0.0422335	0.0330262
1	RPE1-iCas9	Illudin S	177.828	2.25	0.0455488	0.0032245	21620	22687	23386	23193	0.0347907	0.0434869	0.0491838	0.0476108	0.0455488	0.0032245		2.5	0.0382056	0.0623347	0.0502701	0.0387726	0.0601512	0.0494619	0.0447068	0.0568676	0.0507872	0.045476	0.131452	0.0884642	0.0541521	0.0598472	0.0569997	0.0192924	0.0329735	0.0261329
1	RPE1-iCas9	Illudin S	316.228	2.5	0.0382056	0.00093716	22200	22301	21878	21841	0.0395178	0.0403409	0.0368934	0.0365919	0.0382056	0.00093716
1	RPE1-iCas9_CSB-KO	Phenylarsine oxide	10	1	-0.000207844	0.00077273	17517	17259	17213	17682	0.000693396	-0.00110909	-0.00143046	0.00184615	-0.000207844	0.00077273
1	RPE1-iCas9_CSB-KO	Untreated	-	-	1.01343	0.0161227	163585	162343	153677	162610	1.02118	1.0125	0.951957	1.01437	1.01343	0.0161227
1	RPE1-iCas9_CSB-KO	Illudin S	0.177828	-0.75	0.931193	0.00972352	155241	148736	151174	150236	0.962883	0.917437	0.93447	0.927916	0.931193	0.00972352
1	RPE1-iCas9_CSB-KO	Illudin S	0.316228	-0.5	0.91744	0.0142278	143437	152849	150337	147136	0.880416	0.946172	0.928622	0.906259	0.91744	0.0142278
1	RPE1-iCas9_CSB-KO	Illudin S	0.562341	-0.25	0.889481	0.0348759	144523	128524	152177	144946	0.888003	0.776229	0.941477	0.890959	0.889481	0.0348759
1	RPE1-iCas9_CSB-KO	Illudin S	1	0	0.78741	0.0286612	144256	128864	125479	131385	0.886138	0.778604	0.754955	0.796217	0.78741	0.0286612
1	RPE1-iCas9_CSB-KO	Illudin S	1.77828	0.25	0.502353	0.0394065	99756	91190	87455	72726	0.575245	0.5154	0.489306	0.386403	0.502353	0.0394065
1	RPE1-iCas9_CSB-KO	Illudin S	3.16228	0.5	0.152444	0.00681946	41124	39992	36616	38484	0.16562	0.157712	0.134126	0.147176	0.152444	0.00681946
1	RPE1-iCas9_CSB-KO	Illudin S	5.62341	0.75	0.0133212	0.00122226	19035	19338	19311	19872	0.0112987	0.0134156	0.0132269	0.0171463	0.0133212	0.00122226
1	RPE1-iCas9_CSB-KO	Illudin S	10	1	0.0254705	0.0007517	20691	21068	21188	21059	0.0228681	0.025502	0.0263403	0.0254391	0.0254705	0.0007517
1	RPE1-iCas9_CSB-KO	Illudin S	17.7828	1.25	0.0652579	0.00140002	26846	26671	27241	26275	0.0658692	0.0646466	0.0686288	0.06188	0.0652579	0.00140002
1	RPE1-iCas9_CSB-KO	Illudin S	31.6228	1.5	0.0722617	0.00315694	27600	26717	28906	27922	0.0711369	0.0649679	0.0802611	0.0733865	0.0722617	0.00315694
1	RPE1-iCas9_CSB-KO	Illudin S	56.2341	1.75	0.0609473	0.00374923	24564	25769	27039	26514	0.0499263	0.0583449	0.0672175	0.0635497	0.0609473	0.00374923
1	RPE1-iCas9_CSB-KO	Illudin S	100	2	0.0635183	0.00179993	26367	27039	26652	25815	0.0625227	0.0672175	0.0645138	0.0586662	0.0635183	0.00179993
1	RPE1-iCas9_CSB-KO	Illudin S	177.828	2.25	0.0480295	0.00378806	23488	24647	23938	25972	0.042409	0.0505062	0.0455528	0.0597631	0.0480295	0.00378806
1	RPE1-iCas9_CSB-KO	Illudin S	316.228	2.5	0.0387726	0.00154585	22834	23377	22338	23101	0.0378399	0.0416335	0.0343747	0.0397052	0.0387726	0.00154585
1	RPE1-iCas9_ELOF1-KO	Phenylarsine oxide	10	1	0.000364682	0.000808499	16928	17204	16643	17149	-0.000336141	0.00141433	-0.00214369	0.0010655	0.000364682	0.000808499
1	RPE1-iCas9_ELOF1-KO	Untreated	-	-	0.976484	0.0381921	191811	164910	167918	173972	1.10882	0.938209	0.957286	0.995682	0.976484	0.0381921
1	RPE1-iCas9_ELOF1-KO	Illudin S	0.177828	-0.75	0.968696	0.0209055	169970	163778	179667	169464	0.970301	0.931029	1.0318	0.967091	0.968696	0.0209055
1	RPE1-iCas9_ELOF1-KO	Illudin S	0.316228	-0.5	0.95551	0.0160428	167376	175196	162987	167900	0.953849	1.00345	0.926012	0.957172	0.95551	0.0160428
1	RPE1-iCas9_ELOF1-KO	Illudin S	0.562341	-0.25	0.970447	0.0105587	175058	171470	167716	168516	1.00257	0.979814	0.956005	0.961079	0.970447	0.0105587
1	RPE1-iCas9_ELOF1-KO	Illudin S	1	0	0.942731	0.0225836	157274	163374	167872	174128	0.889779	0.928467	0.956995	0.996672	0.942731	0.0225836
1	RPE1-iCas9_ELOF1-KO	Illudin S	1.77828	0.25	0.861597	0.0205992	153677	153879	151984	140300	0.866966	0.868247	0.856228	0.782125	0.861597	0.0205992
1	RPE1-iCas9_ELOF1-KO	Illudin S	3.16228	0.5	0.648623	0.0573485	89488	131394	115681	122820	0.45986	0.72564	0.625984	0.671262	0.648623	0.0573485
1	RPE1-iCas9_ELOF1-KO	Illudin S	5.62341	0.75	0.0817331	0.0101875	28520	31666	24674	31216	0.0731837	0.0931365	0.0487912	0.0902825	0.0817331	0.0101875
1	RPE1-iCas9_ELOF1-KO	Illudin S	10	1	0.00260985	0.00120546	17646	17544	16799	17241	0.00421762	0.00357071	-0.0011543	0.001649	0.00260985	0.00120546
1	RPE1-iCas9_ELOF1-KO	Illudin S	17.7828	1.25	0.00733486	0.00128581	18676	18050	18225	17701	0.0107502	0.00677991	0.00788981	0.00456645	0.00733486	0.00128581
1	RPE1-iCas9_ELOF1-KO	Illudin S	31.6228	1.5	0.0261841	0.00303336	19495	20847	21648	21372	0.0159445	0.0245193	0.0295995	0.027849	0.0261841	0.00303336
1	RPE1-iCas9_ELOF1-KO	Illudin S	56.2341	1.75	0.0511252	0.00118063	24555	24858	25226	25383	0.0480365	0.0499582	0.0522922	0.0532879	0.0511252	0.00118063
1	RPE1-iCas9_ELOF1-KO	Illudin S	100	2	0.0647516	0.00119884	27471	26846	27582	26910	0.0665306	0.0625667	0.0672346	0.0629726	0.0647516	0.00119884
1	RPE1-iCas9_ELOF1-KO	Illudin S	177.828	2.25	0.0572519	0.00244334	25576	27333	25870	26146	0.054512	0.0656554	0.0563766	0.0581271	0.0572519	0.00244334
1	RPE1-iCas9_ELOF1-KO	Illudin S	316.228	2.5	0.0447068	0.00189165	24122	23764	23938	25098	0.0452903	0.0430198	0.0441233	0.0514804	0.0447068	0.00189165
1	RPE1-iCas9_CSB/CSA-dKO	Phenylarsine oxide	10	1	0.000391486	0.000596584	17452	17324	17066	17425	0.000916856	4.91475e-05	-0.00169983	0.000733824	0.000391486	0.000596584
1	RPE1-iCas9_CSB/CSA-dKO	Untreated	-	-	1.00549	0.0187304	170531	167100	164183	157513	1.03864	1.01538	0.995602	0.950386	1.00549	0.0187304
1	RPE1-iCas9_CSB/CSA-dKO	Illudin S	0.177828	-0.75	0.991392	0.0176566	165968	167587	156032	161156	1.0077	1.01868	0.940347	0.975082	0.991392	0.0176566
1	RPE1-iCas9_CSB/CSA-dKO	Illudin S	0.316228	-0.5	0.940598	0.0312194	164036	151736	143465	160402	0.994606	0.911224	0.855155	0.969971	0.940598	0.0312194
1	RPE1-iCas9_CSB/CSA-dKO	Illudin S	0.562341	-0.25	0.964141	0.0161583	162224	156860	166161	156023	0.982322	0.94596	1.00901	0.940286	0.964141	0.0161583
1	RPE1-iCas9_CSB/CSA-dKO	Illudin S	1	0	0.865039	0.02325	144247	135663	152361	145599	0.860457	0.802266	0.915461	0.869622	0.865039	0.02325
1	RPE1-iCas9_CSB/CSA-dKO	Illudin S	1.77828	0.25	0.719474	0.0207897	126270	114043	127429	120630	0.738591	0.655705	0.746448	0.700358	0.719474	0.0207897
1	RPE1-iCas9_CSB/CSA-dKO	Illudin S	3.16228	0.5	0.234358	0.0172813	53084	49459	50692	60821	0.242465	0.217891	0.22625	0.294914	0.234358	0.0172813
1	RPE1-iCas9_CSB/CSA-dKO	Illudin S	5.62341	0.75	0.0275819	0.00277773	21381	22319	21390	20314	0.0275514	0.0339101	0.0276124	0.0203183	0.0275819	0.00277773
1	RPE1-iCas9_CSB/CSA-dKO	Illudin S	10	1	0.0161356	0.0013521	20433	19559	19752	19642	0.021125	0.0152001	0.0165085	0.0157628	0.0161356	0.0013521
1	RPE1-iCas9_CSB/CSA-dKO	Illudin S	17.7828	1.25	0.0443599	0.00142207	24408	23589	24132	23552	0.0480714	0.0425194	0.0462004	0.0422686	0.0443599	0.00142207
1	RPE1-iCas9_CSB/CSA-dKO	Illudin S	31.6228	1.5	0.0776921	0.00432811	29578	27977	30121	27434	0.0831187	0.0722655	0.0867996	0.0685846	0.0776921	0.00432811
1	RPE1-iCas9_CSB/CSA-dKO	Illudin S	56.2341	1.75	0.0665	0.000559149	27076	27177	26864	27241	0.0661577	0.0668424	0.0647205	0.0672762	0.0665	0.000559149
1	RPE1-iCas9_CSB/CSA-dKO	Illudin S	100	2	0.0690252	0.000563167	27526	27508	27177	27490	0.0692082	0.0690862	0.0668424	0.0689642	0.0690252	0.000563167
1	RPE1-iCas9_CSB/CSA-dKO	Illudin S	177.828	2.25	0.0621954	0.00346993	27039	25162	27398	25944	0.0659069	0.0531827	0.0683405	0.0584839	0.0621954	0.00346993
1	RPE1-iCas9_CSB/CSA-dKO	Illudin S	316.228	2.5	0.0541521	0.0023527	26008	24914	25696	24500	0.0589177	0.0515015	0.0568027	0.048695	0.0541521	0.0023527
1	RPE1-iCas9_CSB/ELOF1-dKO	Phenylarsine oxide	10	1	0.00076106	0.0023083	17259	16588	16900	17342	0.00314727	-0.00577276	-0.00162515	0.00425064	0.00076106	0.0023083
1	RPE1-iCas9_CSB/ELOF1-dKO	Untreated	-	-	1.02052	0.0313157	85413	93049	95993	94530	0.909161	1.01067	1.04981	1.03036	1.02052	0.0313157
1	RPE1-iCas9_CSB/ELOF1-dKO	Illudin S	0.177828	-0.75	0.929029	0.0247026	86103	86857	94033	86958	0.918334	0.928357	1.02375	0.9297	0.929029	0.0247026
1	RPE1-iCas9_CSB/ELOF1-dKO	Illudin S	0.316228	-0.5	0.807771	0.0329381	83665	72064	79571	76001	0.885924	0.731705	0.8315	0.784042	0.807771	0.0329381
1	RPE1-iCas9_CSB/ELOF1-dKO	Illudin S	0.562341	-0.25	0.557173	0.0135984	56378	60352	60444	57518	0.523181	0.57601	0.577233	0.538336	0.557173	0.0135984
1	RPE1-iCas9_CSB/ELOF1-dKO	Illudin S	1	0	0.311898	0.0155655	40379	41529	36257	40590	0.310496	0.325784	0.2557	0.313301	0.311898	0.0155655
1	RPE1-iCas9_CSB/ELOF1-dKO	Illudin S	1.77828	0.25	0.116343	0.00396308	26110	25438	26524	25236	0.120809	0.111876	0.126313	0.109191	0.116343	0.00396308
1	RPE1-iCas9_CSB/ELOF1-dKO	Illudin S	3.16228	0.5	0.00950827	0.00119976	17765	17710	17406	17802	0.00987384	0.00914269	0.00510143	0.0103657	0.00950827	0.00119976
1	RPE1-iCas9_CSB/ELOF1-dKO	Illudin S	5.62341	0.75	0.0016185	0.00102069	17158	17130	17425	17084	0.00180461	0.00143239	0.00535401	0.000820882	0.0016185	0.00102069
1	RPE1-iCas9_CSB/ELOF1-dKO	Illudin S	10	1	0.0069426	0.000759649	17673	17489	17416	17600	0.00865083	0.0062048	0.00523437	0.00768039	0.0069426	0.000759649
1	RPE1-iCas9_CSB/ELOF1-dKO	Illudin S	17.7828	1.25	0.0216786	0.00177472	18326	18575	18731	18961	0.0173316	0.0206417	0.0227155	0.025773	0.0216786	0.00177472
1	RPE1-iCas9_CSB/ELOF1-dKO	Illudin S	31.6228	1.5	0.0330513	0.00259924	19283	19403	19614	20166	0.0300536	0.0316488	0.0344538	0.0417918	0.0330513	0.00259924
1	RPE1-iCas9_CSB/ELOF1-dKO	Illudin S	56.2341	1.75	0.0378237	0.000769396	19697	19927	19808	19946	0.0355571	0.0386147	0.0370327	0.0388672	0.0378237	0.000769396
1	RPE1-iCas9_CSB/ELOF1-dKO	Illudin S	100	2	0.0332374	0.00255001	19016	19357	19890	19688	0.0265042	0.0310373	0.0381228	0.0354375	0.0332374	0.00255001
1	RPE1-iCas9_CSB/ELOF1-dKO	Illudin S	177.828	2.25	0.0238189	0.00230379	18612	18464	19016	19210	0.0211335	0.0191661	0.0265042	0.0290831	0.0238189	0.00230379
1	RPE1-iCas9_CSB/ELOF1-dKO	Illudin S	316.228	2.5	0.0192924	0.00102449	18667	18464	18290	18483	0.0218647	0.0191661	0.016853	0.0194187	0.0192924	0.00102449
1	RPE1-iCas9_PTGR1-KO	Phenylarsine oxide	10	1	0.000602098	0.00228324	18326	17508	18106	18667	0.00163293	-0.00603269	-0.000428731	0.0048285	0.000602098	0.00228324
1	RPE1-iCas9_PTGR1-KO	Untreated	-	-	0.982542	0.0633725	129140	141882	111568	116858	1.04009	1.1595	0.87542	0.924993	0.982542	0.0633725
1	RPE1-iCas9_PTGR1-KO	Illudin S	0.177828	-0.75	1.08432	0.172599	111191	196586	137282	130438	0.871887	1.67214	1.11639	1.05225	1.08432	0.172599
1	RPE1-iCas9_PTGR1-KO	Illudin S	0.316228	-0.5	1.03523	0.157023	122820	123814	133428	193025	0.980864	0.990179	1.08027	1.63877	1.03523	0.157023
1	RPE1-iCas9_PTGR1-KO	Illudin S	0.562341	-0.25	1.08475	0.0154634	135617	130852	132195	138129	1.10079	1.05613	1.06872	1.12433	1.08475	0.0154634
1	RPE1-iCas9_PTGR1-KO	Illudin S	1	0	1.0685	0.120825	132986	183006	131358	130116	1.07613	1.54488	1.06088	1.04924	1.0685	0.120825
1	RPE1-iCas9_PTGR1-KO	Illudin S	1.77828	0.25	1.04488	0.106373	123630	127733	131569	172583	0.988455	1.0269	1.06285	1.4472	1.04488	0.106373
1	RPE1-iCas9_PTGR1-KO	Illudin S	3.16228	0.5	1.05303	0.0180703	129223	131818	136914	128331	1.04087	1.06519	1.11294	1.03251	1.05303	0.0180703
1	RPE1-iCas9_PTGR1-KO	Illudin S	5.62341	0.75	1.03634	0.0847255	120483	161147	126702	130778	0.958964	1.34003	1.01724	1.05544	1.03634	0.0847255
1	RPE1-iCas9_PTGR1-KO	Illudin S	10	1	0.994921	0.063771	126804	121836	121366	150107	1.0182	0.971643	0.967238	1.23658	0.994921	0.063771
1	RPE1-iCas9_PTGR1-KO	Illudin S	17.7828	1.25	0.970607	0.04087	120879	105892	122572	125368	0.962675	0.822229	0.97854	1.00474	0.970607	0.04087
1	RPE1-iCas9_PTGR1-KO	Illudin S	31.6228	1.5	0.832059	0.0704892	95064	129858	111587	102295	0.720758	1.04682	0.875598	0.788521	0.832059	0.0704892
1	RPE1-iCas9_PTGR1-KO	Illudin S	56.2341	1.75	0.52401	0.0749439	71134	72956	75182	104908	0.496506	0.51358	0.53444	0.813008	0.52401	0.0749439
1	RPE1-iCas9_PTGR1-KO	Illudin S	100	2	0.187557	0.00120661	38520	38060	37932	38272	0.190874	0.186564	0.185364	0.18855	0.187557	0.00120661
1	RPE1-iCas9_PTGR1-KO	Illudin S	177.828	2.25	0.093283	0.00805908	25254	29109	27563	28649	0.0665564	0.102682	0.0881944	0.0983715	0.093283	0.00805908
1	RPE1-iCas9_PTGR1-KO	Illudin S	316.228	2.5	0.045476	0.00950325	23147	21510	22862	26303	0.0468113	0.0314707	0.0441406	0.0763868	0.045476	0.00950325
2	RPE1-iCas9	Phenylarsine oxide	10	1	0.000792679	0.00182334	44675	45310	45834	45641	-0.00494976	-0.000394546	0.0033644	0.0019799	0.000792679	0.00182334
2	RPE1-iCas9	Untreated	-	-	0.997609	0.00668666	185426	187100	183098	183439	1.00474	1.01674	0.988036	0.990482	0.997609	0.00668666
2	RPE1-iCas9	Illudin S	0.177828	-0.75	1.02487	0.0149186	183623	192418	185665	190799	0.991802	1.05489	1.00645	1.04328	1.02487	0.0149186
2	RPE1-iCas9	Illudin S	0.316228	-0.5	1.01285	0.0139559	183761	183880	189235	191498	0.992792	0.993646	1.03206	1.04829	1.01285	0.0139559
2	RPE1-iCas9	Illudin S	0.562341	-0.25	0.995863	0.00582238	185040	182887	186420	183338	1.00197	0.986523	1.01187	0.989758	0.995863	0.00582238
2	RPE1-iCas9	Illudin S	1	0	1.00259	0.00197406	185325	186024	184800	184929	1.00401	1.00903	1.00025	1.00117	1.00259	0.00197406
2	RPE1-iCas9	Illudin S	1.77828	0.25	1.00949	0.0159256	189897	184110	188066	179906	1.03681	0.995296	1.02367	0.965138	1.00949	0.0159256
2	RPE1-iCas9	Illudin S	3.16228	0.5	1.00071	0.00563535	183963	183752	185766	187064	0.994241	0.992728	1.00718	1.01649	1.00071	0.00563535
2	RPE1-iCas9	Illudin S	5.62341	0.75	0.997774	0.00503558	182868	184644	184267	186282	0.986386	0.999127	0.996422	1.01088	0.997774	0.00503558
2	RPE1-iCas9	Illudin S	10	1	1.05479	0.0220453	191194	181985	193614	196052	1.04611	0.980052	1.06347	1.08096	1.05479	0.0220453
2	RPE1-iCas9	Illudin S	17.7828	1.25	0.724121	0.00929196	149261	143860	147964	144652	0.745304	0.70656	0.736	0.712242	0.724121	0.00929196
2	RPE1-iCas9	Illudin S	31.6228	1.5	0.15506	0.0166995	69727	64161	73756	64234	0.174762	0.134834	0.203665	0.135358	0.15506	0.0166995
2	RPE1-iCas9	Illudin S	56.2341	1.75	0.079727	0.00208619	56755	56203	56874	55605	0.0817069	0.0777471	0.0825605	0.0734573	0.079727	0.00208619
2	RPE1-iCas9	Illudin S	100	2	0.095828	0.00235821	57840	59441	58788	58659	0.0894902	0.100975	0.0962907	0.0953653	0.095828	0.00235821
2	RPE1-iCas9	Illudin S	177.828	2.25	0.0887657	0.00230278	57868	58806	57610	57325	0.0896911	0.0964199	0.0878403	0.0857958	0.0887657	0.00230278
2	RPE1-iCas9	Illudin S	316.228	2.5	0.0623347	0.00204715	54022	54087	54896	53516	0.0621015	0.0625678	0.0683712	0.0584717	0.0623347	0.00204715
2	RPE1-iCas9_CSB-KO	Phenylarsine oxide	10	1	-0.00272732	0.00456856	48576	46883	46037	45834	0.0127653	0.000369745	-0.00582439	-0.00731069	-0.00272732	0.00456856
2	RPE1-iCas9_CSB-KO	Untreated	-	-	0.995605	0.0180013	178130	181847	183779	189897	0.961318	0.988532	1.00268	1.04747	0.995605	0.0180013
2	RPE1-iCas9_CSB-KO	Illudin S	0.177828	-0.75	0.987625	0.00753263	185398	180817	181341	182105	1.01453	0.980991	0.984828	0.990421	0.987625	0.00753263
2	RPE1-iCas9_CSB-KO	Illudin S	0.316228	-0.5	1.05131	0.00809254	190541	192197	190302	186926	1.05219	1.06431	1.05044	1.02572	1.05131	0.00809254
2	RPE1-iCas9_CSB-KO	Illudin S	0.562341	-0.25	1.07998	0.00787345	193476	194700	198232	193973	1.07368	1.08264	1.1085	1.07732	1.07998	0.00787345
2	RPE1-iCas9_CSB-KO	Illudin S	1	0	1.02198	0.00494475	186981	188122	185849	185021	1.02612	1.03448	1.01783	1.01177	1.02198	0.00494475
2	RPE1-iCas9_CSB-KO	Illudin S	1.77828	0.25	0.804575	0.0194653	153934	150346	159510	162095	0.784162	0.757892	0.824988	0.843915	0.804575	0.0194653
2	RPE1-iCas9_CSB-KO	Illudin S	3.16228	0.5	0.152503	0.00762382	68402	70904	66185	66921	0.157925	0.176244	0.141693	0.147081	0.152503	0.00762382
2	RPE1-iCas9_CSB-KO	Illudin S	5.62341	0.75	0.0190986	0.00111301	48870	49533	49450	49432	0.0149179	0.0197722	0.0191645	0.0190327	0.0190986	0.00111301
2	RPE1-iCas9_CSB-KO	Illudin S	10	1	0.0518009	0.0024604	54611	54363	53452	53240	0.0569517	0.0551359	0.0484658	0.0469136	0.0518009	0.0024604
2	RPE1-iCas9_CSB-KO	Illudin S	17.7828	1.25	0.12758	0.00183619	64170	64750	64345	63544	0.12694	0.131186	0.128221	0.122356	0.12758	0.00183619
2	RPE1-iCas9_CSB-KO	Illudin S	31.6228	1.5	0.145833	0.00578381	66341	64667	67160	68439	0.142835	0.130578	0.148831	0.158196	0.145833	0.00578381
2	RPE1-iCas9_CSB-KO	Illudin S	56.2341	1.75	0.130611	0.00283574	66157	64759	64520	64584	0.141488	0.131252	0.129502	0.129971	0.130611	0.00283574
2	RPE1-iCas9_CSB-KO	Illudin S	100	2	0.115961	0.00304477	62735	63213	62606	61272	0.116433	0.119933	0.115488	0.105721	0.115961	0.00304477
2	RPE1-iCas9_CSB-KO	Illudin S	177.828	2.25	0.0862201	0.00344707	57592	58751	58466	59874	0.0787776	0.0872634	0.0851767	0.0954856	0.0862201	0.00344707
2	RPE1-iCas9_CSB-KO	Illudin S	316.228	2.5	0.0601512	0.00250579	55485	55844	54611	54418	0.0633508	0.0659793	0.0569517	0.0555386	0.0601512	0.00250579
2	RPE1-iCas9_ELOF1-KO	Phenylarsine oxide	10	1	0.0024944	0.00266639	42964	44316	44372	44298	-0.00799066	0.00256466	0.00300187	0.00242413	0.0024944	0.00266639
2	RPE1-iCas9_ELOF1-KO	Untreated	-	-	0.998329	0.0177874	176760	167817	175186	168535	1.03658	0.966761	1.02429	0.972366	0.998329	0.0177874
2	RPE1-iCas9_ELOF1-KO	Illudin S	0.177828	-0.75	0.988457	0.00743015	169492	171700	168084	172132	0.979838	0.997076	0.968845	1.00045	0.988457	0.00743015
2	RPE1-iCas9_ELOF1-KO	Illudin S	0.316228	-0.5	1.01191	0.00909846	172647	174855	174552	169786	1.00447	1.02171	1.01934	0.982133	1.01191	0.00909846
2	RPE1-iCas9_ELOF1-KO	Illudin S	0.562341	-0.25	1.01675	0.00811998	170669	175122	173411	175030	0.989027	1.02379	1.01043	1.02307	1.01675	0.00811998
2	RPE1-iCas9_ELOF1-KO	Illudin S	1	0	1.01093	0.0103202	170458	172454	174496	176603	0.98738	1.00296	1.01891	1.03535	1.01093	0.0103202
2	RPE1-iCas9_ELOF1-KO	Illudin S	1.77828	0.25	0.95466	0.00922007	165260	167854	162628	167274	0.946798	0.96705	0.926249	0.962522	0.95466	0.00922007
2	RPE1-iCas9_ELOF1-KO	Illudin S	3.16228	0.5	0.642146	0.026523	129950	130428	116132	122526	0.671126	0.674858	0.563246	0.613165	0.642146	0.026523
2	RPE1-iCas9_ELOF1-KO	Illudin S	5.62341	0.75	0.0374394	0.00765643	48070	48640	52403	48926	0.0318729	0.036323	0.0657014	0.0385558	0.0374394	0.00765643
2	RPE1-iCas9_ELOF1-KO	Illudin S	10	1	0.00763153	0.000834223	44666	45126	45080	44850	0.00529718	0.00888849	0.00852936	0.0067337	0.00763153	0.000834223
2	RPE1-iCas9_ELOF1-KO	Illudin S	17.7828	1.25	0.0128741	0.00198135	44767	45945	45623	45650	0.00608571	0.0152826	0.0127687	0.0129795	0.0128741	0.00198135
2	RPE1-iCas9_ELOF1-KO	Illudin S	31.6228	1.5	0.0382279	0.00381264	49367	48401	47656	49836	0.0419988	0.034457	0.0286407	0.0456604	0.0382279	0.00381264
2	RPE1-iCas9_ELOF1-KO	Illudin S	56.2341	1.75	0.0743596	0.00384018	53544	53452	55458	53480	0.0746094	0.0738912	0.0895524	0.0741098	0.0743596	0.00384018
2	RPE1-iCas9_ELOF1-KO	Illudin S	100	2	0.0830842	0.00464722	54528	56727	54731	54013	0.0822917	0.0994597	0.0838766	0.078271	0.0830842	0.00464722
2	RPE1-iCas9_ELOF1-KO	Illudin S	177.828	2.25	0.0738912	0.00358233	52992	53912	52431	54482	0.0702999	0.0774825	0.06592	0.0819326	0.0738912	0.00358233
2	RPE1-iCas9_ELOF1-KO	Illudin S	316.228	2.5	0.0568676	0.00162236	51511	51492	51051	50637	0.0587374	0.0585891	0.0551461	0.0519139	0.0568676	0.00162236
2	RPE1-iCas9_CSB/CSA-dKO	Phenylarsine oxide	10	1	-0.00101583	0.00511386	48015	46874	45457	44878	0.0123563	0.0041067	-0.00613836	-0.0103246	-0.00101583	0.00511386
2	RPE1-iCas9_CSB/CSA-dKO	Untreated	-	-	1.0018	0.00749246	186769	184120	185610	181967	1.01556	0.99641	1.00718	0.980844	1.0018	0.00749246
2	RPE1-iCas9_CSB/CSA-dKO	Illudin S	0.177828	-0.75	1.00379	0.00337119	186585	184754	185527	184515	1.01423	1.00099	1.00658	0.999266	1.00379	0.00337119
2	RPE1-iCas9_CSB/CSA-dKO	Illudin S	0.316228	-0.5	1.01985	0.0200024	195169	188112	186613	181792	1.0763	1.02527	1.01443	0.979579	1.01985	0.0200024
2	RPE1-iCas9_CSB/CSA-dKO	Illudin S	0.562341	-0.25	1.02271	0.0147294	187340	187744	195758	187772	1.01969	1.02261	1.08055	1.02281	1.02271	0.0147294
2	RPE1-iCas9_CSB/CSA-dKO	Illudin S	1	0	1.00329	0.00662455	187330	184193	185950	183209	1.01962	0.996938	1.00964	0.989824	1.00329	0.00662455
2	RPE1-iCas9_CSB/CSA-dKO	Illudin S	1.77828	0.25	0.744506	0.0192554	153907	141744	151404	147154	0.777967	0.690027	0.75987	0.729142	0.744506	0.0192554
2	RPE1-iCas9_CSB/CSA-dKO	Illudin S	3.16228	0.5	0.181074	0.0217471	74575	68126	78338	65099	0.204388	0.157761	0.231595	0.135875	0.181074	0.0217471
2	RPE1-iCas9_CSB/CSA-dKO	Illudin S	5.62341	0.75	0.0329404	0.00788649	49634	48972	53673	52090	0.0240618	0.0192755	0.0532642	0.041819	0.0329404	0.00788649
2	RPE1-iCas9_CSB/CSA-dKO	Illudin S	10	1	0.045481	0.00190901	53544	52744	52403	52449	0.0523315	0.0465474	0.044082	0.0444146	0.045481	0.00190901
2	RPE1-iCas9_CSB/CSA-dKO	Illudin S	17.7828	1.25	0.11652	0.00580788	64446	63397	61060	61447	0.131154	0.12357	0.106673	0.109471	0.11652	0.00580788
2	RPE1-iCas9_CSB/CSA-dKO	Illudin S	31.6228	1.5	0.146587	0.00565556	64989	66176	68715	66985	0.13508	0.143662	0.16202	0.149511	0.146587	0.00565556
2	RPE1-iCas9_CSB/CSA-dKO	Illudin S	56.2341	1.75	0.132882	0.00343844	64924	64446	63314	65568	0.13461	0.131154	0.12297	0.139266	0.132882	0.00343844
2	RPE1-iCas9_CSB/CSA-dKO	Illudin S	100	2	0.113195	0.0058359	63305	61907	62017	59441	0.122905	0.112797	0.113592	0.0949675	0.113195	0.0058359
2	RPE1-iCas9_CSB/CSA-dKO	Illudin S	177.828	2.25	0.0925418	0.00802981	56580	58475	61870	59736	0.0742821	0.0879832	0.112529	0.0971004	0.0925418	0.00802981
2	RPE1-iCas9_CSB/CSA-dKO	Illudin S	316.228	2.5	0.0598472	0.00177178	54666	54455	55504	54501	0.0604437	0.0589182	0.0665025	0.0592507	0.0598472	0.00177178
2	RPE1-iCas9_CSB/ELOF1-dKO	Phenylarsine oxide	10	1	-0.000214758	0.00236261	45374	45926	46258	45135	-0.00276415	0.00233463	0.00540129	-0.00497177	-0.000214758	0.00236261
2	RPE1-iCas9_CSB/ELOF1-dKO	Untreated	-	-	1.00238	0.00754374	153778	151754	155600	154606	0.998554	0.979859	1.01538	1.0062	1.00238	0.00754374
2	RPE1-iCas9_CSB/ELOF1-dKO	Illudin S	0.177828	-0.75	0.965454	0.0099636	150254	146574	151625	150135	0.966004	0.932012	0.978667	0.964904	0.965454	0.0099636
2	RPE1-iCas9_CSB/ELOF1-dKO	Illudin S	0.316228	-0.5	0.955127	0.00993359	147890	148037	150116	152472	0.944167	0.945525	0.964729	0.986491	0.955127	0.00993359
2	RPE1-iCas9_CSB/ELOF1-dKO	Illudin S	0.562341	-0.25	0.935965	0.0143985	147890	143916	151294	146114	0.944167	0.90746	0.97561	0.927763	0.935965	0.0143985
2	RPE1-iCas9_CSB/ELOF1-dKO	Illudin S	1	0	0.751351	0.0171457	124697	121882	129334	129472	0.729936	0.703934	0.772767	0.774042	0.751351	0.0171457
2	RPE1-iCas9_CSB/ELOF1-dKO	Illudin S	1.77828	0.25	0.283751	0.00612394	77768	77133	74879	75652	0.296456	0.290591	0.269771	0.276911	0.283751	0.00612394
2	RPE1-iCas9_CSB/ELOF1-dKO	Illudin S	3.16228	0.5	0.0277038	0.00494238	48935	48410	49901	47334	0.0301285	0.0252791	0.0390514	0.0153402	0.0277038	0.00494238
2	RPE1-iCas9_CSB/ELOF1-dKO	Illudin S	5.62341	0.75	0.00841714	0.00297934	46451	45439	46718	46874	0.00718401	-0.00216375	0.00965027	0.0110912	0.00841714	0.00297934
2	RPE1-iCas9_CSB/ELOF1-dKO	Illudin S	10	1	0.00586313	0.00252961	46975	46570	46046	45742	0.0120242	0.0082832	0.00344306	0.000635038	0.00586313	0.00252961
2	RPE1-iCas9_CSB/ELOF1-dKO	Illudin S	17.7828	1.25	0.0289785	0.00271067	48383	48732	49763	48889	0.0250297	0.0282534	0.0377767	0.0297036	0.0289785	0.00271067
2	RPE1-iCas9_CSB/ELOF1-dKO	Illudin S	31.6228	1.5	0.039855	0.00442874	49956	48659	50020	50996	0.0395594	0.0275791	0.0401506	0.0491658	0.039855	0.00442874
2	RPE1-iCas9_CSB/ELOF1-dKO	Illudin S	56.2341	1.75	0.0440208	0.00209931	50195	50802	49818	50683	0.041767	0.0473738	0.0382847	0.0462746	0.0440208	0.00209931
2	RPE1-iCas9_CSB/ELOF1-dKO	Illudin S	100	2	0.0467827	0.00118332	50499	50885	51051	50591	0.044575	0.0481405	0.0496738	0.0454248	0.0467827	0.00118332
2	RPE1-iCas9_CSB/ELOF1-dKO	Illudin S	177.828	2.25	0.0422335	0.00160765	50462	50149	49671	50342	0.0442333	0.0413421	0.0369269	0.0431248	0.0422335	0.00160765
2	RPE1-iCas9_CSB/ELOF1-dKO	Illudin S	316.228	2.5	0.0329735	0.00263064	50039	49478	49008	48742	0.0403261	0.0351442	0.0308028	0.0283458	0.0329735	0.00263064
2	RPE1-iCas9_PTGR1-KO	Phenylarsine oxide	10	1	-0.0036983	0.005746	48512	46626	45604	45512	0.0160672	0.00051537	-0.00791197	-0.00867059	-0.0036983	0.005746
2	RPE1-iCas9_PTGR1-KO	Untreated	-	-	1.0019	0.00678957	169501	168673	167458	165710	1.01373	1.00691	0.996887	0.982473	1.0019	0.00678957
2	RPE1-iCas9_PTGR1-KO	Illudin S	0.177828	-0.75	1.00839	0.00959512	169630	168075	167606	172758	1.0148	1.00197	0.998108	1.04059	1.00839	0.00959512
2	RPE1-iCas9_PTGR1-KO	Illudin S	0.316228	-0.5	1.0539	0.011307	173135	175610	172334	178416	1.0437	1.06411	1.03709	1.08725	1.0539	0.011307
2	RPE1-iCas9_PTGR1-KO	Illudin S	0.562341	-0.25	1.06741	0.0147446	172454	180099	178140	173880	1.03808	1.10112	1.08497	1.04984	1.06741	0.0147446
2	RPE1-iCas9_PTGR1-KO	Illudin S	1	0	1.0506	0.00687836	174478	173466	176622	172804	1.05477	1.04643	1.07245	1.04097	1.0506	0.00687836
2	RPE1-iCas9_PTGR1-KO	Illudin S	1.77828	0.25	1.04381	0.00153928	173632	172859	173383	172914	1.0478	1.04142	1.04574	1.04188	1.04381	0.00153928
2	RPE1-iCas9_PTGR1-KO	Illudin S	3.16228	0.5	1.05663	0.00907987	173843	174064	175343	178618	1.04954	1.05136	1.06191	1.08891	1.05663	0.00907987
2	RPE1-iCas9_PTGR1-KO	Illudin S	5.62341	0.75	1.04412	0.00851992	175168	173098	170163	173273	1.06046	1.04339	1.01919	1.04484	1.04412	0.00851992
2	RPE1-iCas9_PTGR1-KO	Illudin S	10	1	1.047	0.0125466	173963	176244	173107	168958	1.05053	1.06934	1.04347	1.00926	1.047	0.0125466
2	RPE1-iCas9_PTGR1-KO	Illudin S	17.7828	1.25	1.11171	0.00625282	181939	183466	180826	179952	1.1163	1.12889	1.10712	1.09991	1.11171	0.00625282
2	RPE1-iCas9_PTGR1-KO	Illudin S	31.6228	1.5	1.13875	0.0105372	183844	182804	185481	188655	1.132	1.12343	1.1455	1.17168	1.13875	0.0105372
2	RPE1-iCas9_PTGR1-KO	Illudin S	56.2341	1.75	0.98498	0.0126689	168443	168489	163585	162766	1.00501	1.00539	0.964951	0.958197	0.98498	0.0126689
2	RPE1-iCas9_PTGR1-KO	Illudin S	100	2	0.601911	0.0146556	119940	119177	121872	113592	0.605057	0.598766	0.620988	0.552712	0.601911	0.0146556
2	RPE1-iCas9_PTGR1-KO	Illudin S	177.828	2.25	0.223399	0.0242553	70408	68181	80978	76903	0.19662	0.178256	0.283779	0.250177	0.223399	0.0242553
2	RPE1-iCas9_PTGR1-KO	Illudin S	316.228	2.5	0.131452	0.00307227	62891	62330	62680	61217	0.134635	0.130009	0.132895	0.120832	0.131452	0.00307227

## Sheet: Figure 7d
Experiment	Cell line	Drug	Concentration (nM)	Log10(nM)	Median_viability	SEM	Fluorescence_r1	Fluorescence_r2	Fluorescence_r3	Fluorescence_r4	Viability_r1	Viability_r2	Viability_r3	Viability_r4	Median_viability	SEM		Irofulven	RPE1-iCas9			RPE1-iCas9 CSB-KO (15)			RPE1-iCas9 ELOF1-KO (2-16)			RPE1-iCas9 PTGR1-KO (11)			RPE1-iCas9 CSB -KO (15)/CSA-KO (3-21)			RPE1-iCas9 CSB -KO (15)/ELOF1-KO (2-20)
1	RPE1-iCas9	Phenylarsine oxide	10	1	0.00025527	0.00188313	17259	16560	16192	17020	0.00396757	-0.00156526	-0.00447811	0.0020758	0.00025527	0.00188313		Log10(nM)	Exp_1 mean	Exp_2 mean	Exp_1+2 mean	Exp_1 mean	Exp_2 mean	Exp_1+2 mean	Exp_1 mean	Exp_2 mean	Exp_1+2 mean	Exp_1 mean	Exp_2 mean	Exp_1+2 mean	Exp_1 mean	Exp_2 mean	Exp_1+2 mean	Exp_1 mean	Exp_2 mean	Exp_1+2 mean
1	RPE1-iCas9	Untreated	-	-	1.02926	0.0432601	151340	143741	149840	127457	1.06527	1.00512	1.05339	0.876224	1.02926	0.0432601		0.75	0.997796	0.967645	0.98272	0.975884	1.03114	1.00351	1.02475	1.01843	1.02159	1.02169	0.994237	1.00796	0.961952	1.01202	0.986986	1.03381	0.991757	1.01279
1	RPE1-iCas9	Irofulven	5.62341	0.75	0.997796	0.0376707	135074	134430	151855	150558	0.936515	0.931417	1.06934	1.05908	0.997796	0.0376707		1	1.00133	0.971342	0.986334	0.975134	1.0489	1.01202	1.02328	1.00929	1.01628	1.00668	1.00323	1.00496	0.942552	1.06643	1.00449	0.981913	0.986367	0.98414
1	RPE1-iCas9	Irofulven	10	1	1.00133	0.0285301	148148	143308	143216	131229	1.04	1.00169	1.00096	0.90608	1.00133	0.0285301		1.25	0.974968	0.97466	0.974814	0.938081	1.08147	1.00977	0.986273	1.02806	1.00717	0.953212	1.02697	0.990089	0.93965	1.08244	1.01105	0.886927	0.996827	0.941877
1	RPE1-iCas9	Irofulven	17.7828	1.25	0.974968	0.0447936	158608	140732	139132	131992	1.12279	0.9813	0.968635	0.91212	0.974968	0.0447936		1.5	0.920898	1.00273	0.961815	0.933772	1.07916	1.00647	1.0099	1.02315	1.01652	1.01196	1.01914	1.01555	0.88715	1.08805	0.987601	0.682205	0.994155	0.83818
1	RPE1-iCas9	Irofulven	31.6228	1.5	0.920898	0.0526826	133658	126712	156888	132544	0.925307	0.870327	1.10918	0.916489	0.920898	0.0526826		1.75	0.949338	0.970411	0.959874	0.924594	1.07916	1.00188	0.969604	1.01518	0.992391	0.995854	1.04736	1.02161	0.808187	1.04636	0.927273	0.552332	0.949414	0.750873
1	RPE1-iCas9	Irofulven	56.2341	1.75	0.949338	0.0410401	145654	142214	131174	123022	1.02026	0.993031	0.905645	0.841119	0.949338	0.0410401		2	0.983817	0.948595	0.966206	0.786119	1.04006	0.913087	1.01001	0.985253	0.997632	0.991778	0.99642	0.994099	0.689555	0.998085	0.84382	0.30688	0.797654	0.552267
1	RPE1-iCas9	Irofulven	100	2	0.983817	0.0304952	149638	135516	146584	134412	1.05179	0.940013	1.02762	0.931275	0.983817	0.0304952		2.25	0.932332	0.972037	0.952185	0.431723	0.687041	0.559382	0.862432	0.934716	0.898574	0.983187	1.00545	0.994316	0.395856	0.768649	0.582252	0.142325	0.362178	0.252252
1	RPE1-iCas9	Irofulven	177.828	2.25	0.932332	0.0521334	134256	122424	154238	134835	0.93004	0.836386	1.0882	0.934623	0.932332	0.0521334		2.5	0.890788	0.915928	0.903358	0.117623	0.133089	0.125356	0.506185	0.723569	0.614877	1.00187	0.989648	0.995758	0.0862285	0.204055	0.145142	0.0322762	0.0756067	0.0539415
1	RPE1-iCas9	Irofulven	316.228	2.5	0.890788	0.0198004	134136	130916	127678	122406	0.92909	0.903603	0.877973	0.836243	0.890788	0.0198004		2.75	0.919624	0.942858	0.931241	0.0225724	0.0447908	0.0336816	0.0376544	0.0933444	0.0654994	1.04167	0.982995	1.01233	0.0151272	0.0425116	0.0288194	0.0108645	0.00690869	0.00888661
1	RPE1-iCas9	Irofulven	562.341	2.75	0.919624	0.0368919	137052	139233	118689	128828	0.952171	0.969435	0.806822	0.887076	0.919624	0.0368919		3	0.71762	0.893981	0.805801	0.0489773	0.104947	0.0769624	0.00707802	0.00899767	0.00803784	0.998462	0.976887	0.987674	0.0426549	0.0774072	0.060031	0.0172129	0.0196776	0.0184452
1	RPE1-iCas9	Irofulven	1000	3	0.71762	0.0525599	102433	108818	131799	106021	0.67815	0.728689	0.910592	0.70655	0.71762	0.0525599		3.25	0.38639	0.527628	0.457009	0.0851577	0.173037	0.129098	0.0199229	0.032751	0.0263369	1.01043	0.963538	0.986983	0.0768405	0.150801	0.113821	0.0409857	0.0507482	0.0458669
1	RPE1-iCas9	Irofulven	1778.28	3.25	0.38639	0.0189118	72321	62974	68172	62091	0.439803	0.365818	0.406962	0.358829	0.38639	0.0189118		3.5	0.0935733	0.177762	0.135668	0.0916181	0.188022	0.13982	0.04832	0.0760661	0.062193	1.04862	0.981827	1.01522	0.0884687	0.179266	0.133867	0.0569734	0.0785503	0.0677619
1	RPE1-iCas9	Irofulven	3162.28	3.5	0.0935733	0.0162931	35779	26459	29274	27885	0.15056	0.0767888	0.0990705	0.0880761	0.0935733	0.0162931		3.75	0.044605	0.112673	0.078639	0.0843773	0.170185	0.127281	0.0765805	0.109129	0.0928546	1.05427	0.971008	1.01264	0.0795986	0.173098	0.126348	0.0638897	0.0784568	0.0711733
1	RPE1-iCas9	Irofulven	5623.41	3.75	0.044605	0.00188762	22724	22062	21841	22798	0.047225	0.041985	0.0402357	0.0478107	0.044605	0.00188762		4	0.0524689	0.134796	0.0936327	0.0826298	0.157358	0.119994	0.0773059	0.116709	0.0970076	1.03733	0.911903	0.974616	0.0737424	0.152587	0.113165	0.0524071	0.0765617	0.0644844
1	RPE1-iCas9	Irofulven	10000	4	0.0524689	0.00381242	25245	23322	23451	23212	0.0671796	0.0519584	0.0529794	0.0510877	0.0524689	0.00381242
1	RPE1-iCas9_CSB-KO	Phenylarsine oxide	10	1	-0.000561554	0.00112087	17397	16753	16652	16965	0.00308939	-0.00128089	-0.00196629	0.000157778	-0.000561554	0.00112087
1	RPE1-iCas9_CSB-KO	Untreated	-	-	0.997457	0.0128077	162500	165352	160310	169041	0.98778	1.00713	0.972918	1.03217	0.997457	0.0128077
1	RPE1-iCas9_CSB-KO	Irofulven	5.62341	0.75	0.975884	0.016719	161635	168397	159859	156740	0.98191	1.0278	0.969858	0.948692	0.975884	0.016719
1	RPE1-iCas9_CSB-KO	Irofulven	10	1	0.975134	0.0227988	150668	157522	165462	163751	0.907486	0.953998	1.00788	0.996269	0.975134	0.0227988
1	RPE1-iCas9_CSB-KO	Irofulven	17.7828	1.25	0.938081	0.0182093	152380	149288	157973	161184	0.919104	0.898121	0.957059	0.978849	0.938081	0.0182093
1	RPE1-iCas9_CSB-KO	Irofulven	31.6228	1.5	0.933772	0.0286006	152922	163024	142766	156161	0.922782	0.991336	0.853862	0.944762	0.933772	0.0286006
1	RPE1-iCas9_CSB-KO	Irofulven	56.2341	1.75	0.924594	0.00998573	152122	154965	148414	154256	0.917353	0.936646	0.89219	0.931835	0.924594	0.00998573
1	RPE1-iCas9_CSB-KO	Irofulven	100	2	0.786119	0.0168215	125258	136933	131615	133952	0.73505	0.814278	0.77819	0.794049	0.786119	0.0168215
1	RPE1-iCas9_CSB-KO	Irofulven	177.828	2.25	0.431723	0.00763897	80132	76664	81770	80988	0.428818	0.405284	0.439934	0.434627	0.431723	0.00763897
1	RPE1-iCas9_CSB-KO	Irofulven	316.228	2.5	0.117623	0.0104575	34840	29330	36552	33709	0.12146	0.0840685	0.133078	0.113785	0.117623	0.0104575
1	RPE1-iCas9_CSB-KO	Irofulven	562.341	2.75	0.0225724	0.00134316	20452	20562	19688	20084	0.0238211	0.0245676	0.0186365	0.0213238	0.0225724	0.00134316
1	RPE1-iCas9_CSB-KO	Irofulven	1000	3	0.0489773	0.00295642	23883	24435	23092	25153	0.0471044	0.0508503	0.0417365	0.0557228	0.0489773	0.00295642
1	RPE1-iCas9_CSB-KO	Irofulven	1778.28	3.25	0.0851577	0.00224129	29256	28373	29725	29817	0.0835663	0.0775742	0.086749	0.0873734	0.0851577	0.00224129
1	RPE1-iCas9_CSB-KO	Irofulven	3162.28	3.5	0.0916181	0.00126658	30378	30342	30507	31142	0.0911804	0.0909361	0.0920558	0.096365	0.0916181	0.00126658
1	RPE1-iCas9_CSB-KO	Irofulven	5623.41	3.75	0.0843773	0.00318763	29063	29311	31124	29440	0.0822566	0.0839396	0.0962428	0.084815	0.0843773	0.00318763
1	RPE1-iCas9_CSB-KO	Irofulven	10000	4	0.0826298	0.000680876	29173	28741	29146	29090	0.0830031	0.0800715	0.0828198	0.0824398	0.0826298	0.000680876
1	RPE1-iCas9_ELOF1-KO	Phenylarsine oxide	10	1	0.000907517	0.00110077	17360	16588	17213	17333	0.00143564	-0.00325067	0.000543296	0.00127174	0.000907517	0.00110077
1	RPE1-iCas9_ELOF1-KO	Untreated	-	-	1.01719	0.0349793	182988	165600	192455	186392	1.00685	0.901304	1.06432	1.02752	1.01719	0.0349793
1	RPE1-iCas9_ELOF1-KO	Irofulven	5.62341	0.75	1.02475	0.0284067	184791	193596	171322	187082	1.0178	1.07125	0.936038	1.03171	1.02475	0.0284067
1	RPE1-iCas9_ELOF1-KO	Irofulven	10	1	1.02328	0.00324366	185463	184570	185923	187137	1.02188	1.01646	1.02467	1.03204	1.02328	0.00324366
1	RPE1-iCas9_ELOF1-KO	Irofulven	17.7828	1.25	0.986273	0.0206047	177109	188002	172150	182086	0.971167	1.03729	0.941065	1.00138	0.986273	0.0206047
1	RPE1-iCas9_ELOF1-KO	Irofulven	31.6228	1.5	1.0099	0.00946172	183264	183715	181240	188591	1.00853	1.01127	0.996244	1.04087	1.0099	0.00946172
1	RPE1-iCas9_ELOF1-KO	Irofulven	56.2341	1.75	0.969604	0.0125804	169584	179004	177413	176290	0.925488	0.982671	0.973013	0.966196	0.969604	0.0125804
1	RPE1-iCas9_ELOF1-KO	Irofulven	100	2	1.01001	0.0100282	189161	183586	183430	181488	1.04433	1.01049	1.00954	0.997749	1.01001	0.0100282
1	RPE1-iCas9_ELOF1-KO	Irofulven	177.828	2.25	0.862432	0.0199038	154238	155360	163033	168075	0.832332	0.839143	0.885721	0.916328	0.862432	0.0199038
1	RPE1-iCas9_ELOF1-KO	Irofulven	316.228	2.5	0.506185	0.025804	99194	87888	108256	101826	0.498196	0.429565	0.553206	0.514173	0.506185	0.025804
1	RPE1-iCas9_ELOF1-KO	Irofulven	562.341	2.75	0.0376544	0.00665503	27462	23653	23000	22770	0.0627583	0.0396363	0.0356724	0.0342762	0.0376544	0.00665503
1	RPE1-iCas9_ELOF1-KO	Irofulven	1000	3	0.00707802	0.000719323	18271	18308	18593	18014	0.00696572	0.00719033	0.00892037	0.00540564	0.00707802	0.000719323
1	RPE1-iCas9_ELOF1-KO	Irofulven	1778.28	3.25	0.0199229	0.00134907	20884	20580	19854	20231	0.0228275	0.0209822	0.0165751	0.0188636	0.0199229	0.00134907
1	RPE1-iCas9_ELOF1-KO	Irofulven	3162.28	3.5	0.04832	0.00481812	24638	28078	25180	24987	0.0456156	0.0664976	0.0489057	0.0477342	0.04832	0.00481812
1	RPE1-iCas9_ELOF1-KO	Irofulven	5623.41	3.75	0.0765805	0.00138719	30047	29348	30277	29431	0.0784501	0.0742069	0.0798463	0.0747108	0.0765805	0.00138719
1	RPE1-iCas9_ELOF1-KO	Irofulven	10000	4	0.0773059	0.000552993	30148	29734	29799	29918	0.0790632	0.0765501	0.0769447	0.077667	0.0773059	0.000552993
1	RPE1-iCas9_CSB/CSA-dKO	Phenylarsine oxide	10	1	-0.00103427	0.0015394	16974	17176	17222	18087	-0.00243827	-0.00117779	-0.000890755	0.00450682	-0.00103427	0.0015394
1	RPE1-iCas9_CSB/CSA-dKO	Untreated	-	-	0.991489	0.0208607	176336	186944	171028	176180	0.991975	1.05817	0.958854	0.991002	0.991489	0.0208607
1	RPE1-iCas9_CSB/CSA-dKO	Irofulven	5.62341	0.75	0.961952	0.017656	174266	174818	162702	168783	0.979059	0.982503	0.9069	0.944845	0.961952	0.017656
1	RPE1-iCas9_CSB/CSA-dKO	Irofulven	10	1	0.942552	0.00932938	173650	168029	166842	168802	0.975215	0.94014	0.932733	0.944963	0.942552	0.00932938
1	RPE1-iCas9_CSB/CSA-dKO	Irofulven	17.7828	1.25	0.93965	0.0274418	168857	151211	169998	167044	0.945307	0.835196	0.952426	0.933994	0.93965	0.0274418
1	RPE1-iCas9_CSB/CSA-dKO	Irofulven	31.6228	1.5	0.88715	0.0153649	161018	167081	155682	158056	0.896392	0.934225	0.863095	0.877909	0.88715	0.0153649
1	RPE1-iCas9_CSB/CSA-dKO	Irofulven	56.2341	1.75	0.808187	0.0233026	141459	149638	144127	158369	0.774344	0.825381	0.790992	0.879862	0.808187	0.0233026
1	RPE1-iCas9_CSB/CSA-dKO	Irofulven	100	2	0.689555	0.0140919	124890	130852	130962	121872	0.670954	0.708157	0.708843	0.652122	0.689555	0.0140919
1	RPE1-iCas9_CSB/CSA-dKO	Irofulven	177.828	2.25	0.395856	0.0114078	81337	80270	74741	83260	0.399185	0.392527	0.358026	0.411184	0.395856	0.0114078
1	RPE1-iCas9_CSB/CSA-dKO	Irofulven	316.228	2.5	0.0862285	0.010093	32439	28962	36211	29928	0.0940628	0.0723665	0.1176	0.0783943	0.0862285	0.010093
1	RPE1-iCas9_CSB/CSA-dKO	Irofulven	562.341	2.75	0.0151272	0.00103185	19789	19375	19789	20185	0.0151272	0.0125439	0.0151272	0.0175983	0.0151272	0.00103185
1	RPE1-iCas9_CSB/CSA-dKO	Irofulven	1000	3	0.0426549	0.00243776	25208	24536	23423	23865	0.0489416	0.0447484	0.0378033	0.0405613	0.0426549	0.00243776
1	RPE1-iCas9_CSB/CSA-dKO	Irofulven	1778.28	3.25	0.0768405	0.00106334	29652	29688	29670	30351	0.076672	0.0768967	0.0767844	0.0810338	0.0768405	0.00106334
1	RPE1-iCas9_CSB/CSA-dKO	Irofulven	3162.28	3.5	0.0884687	0.00242659	32789	31455	31630	30949	0.0962468	0.0879227	0.0890147	0.0847653	0.0884687	0.00242659
1	RPE1-iCas9_CSB/CSA-dKO	Irofulven	5623.41	3.75	0.0795986	0.00315922	29376	29302	31271	30866	0.0749498	0.074488	0.0867745	0.0842474	0.0795986	0.00315922
1	RPE1-iCas9_CSB/CSA-dKO	Irofulven	10000	4	0.0737424	0.00287607	29652	30627	28713	28686	0.076672	0.082756	0.0708127	0.0706442	0.0737424	0.00287607
1	RPE1-iCas9_CSB/ELOF1-dKO	Phenylarsine oxide	10	1	-0.000562439	0.00103636	16983	16680	16652	16551	0.00296812	-0.000406515	-0.000718363	-0.00184324	-0.000562439	0.00103636
1	RPE1-iCas9_CSB/ELOF1-dKO	Untreated	-	-	1.03228	0.0423165	95404	107806	111808	110998	0.876375	1.0145	1.05907	1.05005	1.03228	0.0423165
1	RPE1-iCas9_CSB/ELOF1-dKO	Irofulven	5.62341	0.75	1.03381	0.0523579	107171	111992	92101	111909	1.00743	1.06112	0.839588	1.0602	1.03381	0.0523579
1	RPE1-iCas9_CSB/ELOF1-dKO	Irofulven	10	1	0.981913	0.0104111	104070	105690	102893	107171	0.972892	0.990934	0.959783	1.00743	0.981913	0.0104111
1	RPE1-iCas9_CSB/ELOF1-dKO	Irofulven	17.7828	1.25	0.886927	0.0485578	79166	96609	96094	97060	0.695526	0.889795	0.88406	0.894818	0.886927	0.0485578
1	RPE1-iCas9_CSB/ELOF1-dKO	Irofulven	31.6228	1.5	0.682205	0.029583	79148	87823	76470	76792	0.695325	0.791942	0.665499	0.669085	0.682205	0.029583
1	RPE1-iCas9_CSB/ELOF1-dKO	Irofulven	56.2341	1.75	0.552332	0.0323215	65863	66755	61612	75449	0.547365	0.557299	0.500019	0.654128	0.552332	0.0323215
1	RPE1-iCas9_CSB/ELOF1-dKO	Irofulven	100	2	0.30688	0.0103708	41952	44510	46488	44031	0.281058	0.309548	0.331577	0.304213	0.30688	0.0103708
1	RPE1-iCas9_CSB/ELOF1-dKO	Irofulven	177.828	2.25	0.142325	0.00438339	29422	30728	29569	28851	0.141506	0.156052	0.143144	0.135147	0.142325	0.00438339
1	RPE1-iCas9_CSB/ELOF1-dKO	Irofulven	316.228	2.5	0.0322762	0.00314423	20111	18888	19927	19302	0.0378059	0.0241849	0.0357566	0.0287958	0.0322762	0.00314423
1	RPE1-iCas9_CSB/ELOF1-dKO	Irofulven	562.341	2.75	0.0108645	0.000547992	17692	17692	17756	17526	0.0108645	0.0108645	0.0115773	0.00901573	0.0108645	0.000547992
1	RPE1-iCas9_CSB/ELOF1-dKO	Irofulven	1000	3	0.0172129	0.00152548	18161	18124	18722	18363	0.016088	0.0156759	0.0223361	0.0183377	0.0172129	0.00152548
1	RPE1-iCas9_CSB/ELOF1-dKO	Irofulven	1778.28	3.25	0.0409857	0.000806038	20369	20286	20626	20424	0.0406794	0.039755	0.0435417	0.0412919	0.0409857	0.000806038
1	RPE1-iCas9_CSB/ELOF1-dKO	Irofulven	3162.28	3.5	0.0569734	0.00186359	21740	21270	22025	21924	0.0559488	0.0507142	0.0591229	0.0579981	0.0569734	0.00186359
1	RPE1-iCas9_CSB/ELOF1-dKO	Irofulven	5623.41	3.75	0.0638897	0.00147416	21933	22430	22476	22476	0.0580983	0.0636336	0.0641459	0.0641459	0.0638897	0.00147416
1	RPE1-iCas9_CSB/ELOF1-dKO	Irofulven	10000	4	0.0524071	0.00249432	21970	20884	21344	21500	0.0585104	0.0464151	0.0515384	0.0532758	0.0524071	0.00249432
1	RPE1-iCas9_PTGR1-KO	Phenylarsine oxide	10	1	0.000650208	0.000899941	16937	16956	16422	16799	0.00115149	0.00128952	-0.00258993	0.00014893	0.000650208	0.000899941
1	RPE1-iCas9_PTGR1-KO	Untreated	-	-	0.995421	0.0243346	156897	162601	147513	150696	1.01795	1.05939	0.949772	0.972896	0.995421	0.0243346
1	RPE1-iCas9_PTGR1-KO	Irofulven	5.62341	0.75	1.02169	0.0191673	153392	157660	165913	157164	0.992483	1.02349	1.08345	1.01989	1.02169	0.0191673
1	RPE1-iCas9_PTGR1-KO	Irofulven	10	1	1.00668	0.0165526	148157	153373	157320	158120	0.954451	0.992345	1.02102	1.02683	1.00668	0.0165526
1	RPE1-iCas9_PTGR1-KO	Irofulven	17.7828	1.25	0.953212	0.0163603	140438	150981	147770	148203	0.898373	0.974967	0.951639	0.954785	0.953212	0.0163603
1	RPE1-iCas9_PTGR1-KO	Irofulven	31.6228	1.5	1.01196	0.0348349	155434	156713	173089	151285	1.00732	1.01661	1.13558	0.977176	1.01196	0.0348349
1	RPE1-iCas9_PTGR1-KO	Irofulven	56.2341	1.75	0.995854	0.0164726	153327	156234	145903	154385	0.99201	1.01313	0.938076	0.999697	0.995854	0.0164726
1	RPE1-iCas9_PTGR1-KO	Irofulven	100	2	0.991778	0.0143996	149942	155811	150779	158176	0.967419	1.01006	0.973499	1.02724	0.991778	0.0143996
1	RPE1-iCas9_PTGR1-KO	Irofulven	177.828	2.25	0.983187	0.0215839	148267	155222	160945	149003	0.95525	1.00578	1.04735	0.960597	0.983187	0.0215839
1	RPE1-iCas9_PTGR1-KO	Irofulven	316.228	2.5	1.00187	0.0123313	149942	153373	155995	157743	0.967419	0.992345	1.01139	1.02409	1.00187	0.0123313
1	RPE1-iCas9_PTGR1-KO	Irofulven	562.341	2.75	1.04167	0.0139364	162555	155296	157771	163291	1.05905	1.00632	1.0243	1.0644	1.04167	0.0139364
1	RPE1-iCas9_PTGR1-KO	Irofulven	1000	3	0.998462	0.0185505	156345	162536	151450	152085	1.01394	1.05891	0.978374	0.982987	0.998462	0.0185505
1	RPE1-iCas9_PTGR1-KO	Irofulven	1778.28	3.25	1.01043	0.0101438	150935	155103	157062	156621	0.974633	1.00491	1.01914	1.01594	1.01043	0.0101438
1	RPE1-iCas9_PTGR1-KO	Irofulven	3162.28	3.5	1.04862	0.00975797	160190	157127	163309	162049	1.04187	1.01962	1.06453	1.05537	1.04862	0.00975797
1	RPE1-iCas9_PTGR1-KO	Irofulven	5623.41	3.75	1.05427	0.0261175	156658	162141	173650	161653	1.01621	1.05604	1.13965	1.0525	1.05427	0.0261175
1	RPE1-iCas9_PTGR1-KO	Irofulven	10000	4	1.03733	0.0127271	159298	159832	156437	164864	1.03539	1.03927	1.0146	1.07583	1.03733	0.0127271
2	RPE1-iCas9	Phenylarsine oxide	10	1	-0.000398284	0.00125815	45844	45080	45227	45485	0.00326893	-0.00247236	-0.00136769	0.000571124	-0.000398284	0.00125815
2	RPE1-iCas9	Untreated	-	-	1.00114	0.0094224	181378	178342	175278	178922	1.02178	0.998963	0.975938	1.00332	1.00114	0.0094224
2	RPE1-iCas9	Irofulven	5.62341	0.75	0.967645	0.0188422	168728	171801	180053	176548	0.926716	0.949809	1.01182	0.985481	0.967645	0.0188422
2	RPE1-iCas9	Irofulven	10	1	0.971342	0.0148875	175499	173834	173172	181847	0.977598	0.965086	0.960112	1.0253	0.971342	0.0148875
2	RPE1-iCas9	Irofulven	17.7828	1.25	0.97466	0.00832824	174717	177854	172482	175499	0.971722	0.995296	0.954926	0.977598	0.97466	0.00832824
2	RPE1-iCas9	Irofulven	31.6228	1.5	1.00273	0.0122231	173622	181286	178370	179317	0.963493	1.02109	0.999173	1.00629	1.00273	0.0122231
2	RPE1-iCas9	Irofulven	56.2341	1.75	0.970411	0.0133055	179004	173475	175610	170605	1.00394	0.962388	0.978433	0.940821	0.970411	0.0133055
2	RPE1-iCas9	Irofulven	100	2	0.948595	0.0161969	179308	171322	171957	169528	1.00622	0.946209	0.950981	0.932728	0.948595	0.0161969
2	RPE1-iCas9	Irofulven	177.828	2.25	0.972037	0.0130276	176493	174828	174690	168599	0.985068	0.972556	0.971519	0.925746	0.972037	0.0130276
2	RPE1-iCas9	Irofulven	316.228	2.5	0.915928	0.011835	171387	165103	165158	169427	0.946698	0.899475	0.899888	0.931969	0.915928	0.011835
2	RPE1-iCas9	Irofulven	562.341	2.75	0.942858	0.00394747	171801	170172	169657	171580	0.949809	0.937567	0.933697	0.948148	0.942858	0.00394747
2	RPE1-iCas9	Irofulven	1000	3	0.893981	0.0122632	163052	160476	165692	168020	0.884062	0.864704	0.903901	0.921395	0.893981	0.0122632
2	RPE1-iCas9	Irofulven	1778.28	3.25	0.527628	0.0124329	113786	111826	119048	117456	0.513838	0.499109	0.553381	0.541418	0.527628	0.0124329
2	RPE1-iCas9	Irofulven	3162.28	3.5	0.177762	0.00612428	70960	67528	70076	68052	0.19201	0.16622	0.185367	0.170157	0.177762	0.00612428
2	RPE1-iCas9	Irofulven	5623.41	3.75	0.112673	0.00512751	62302	59625	59414	61180	0.126947	0.10683	0.105245	0.118516	0.112673	0.00512751
2	RPE1-iCas9	Irofulven	10000	4	0.134796	0.00103169	63342	63351	63701	63029	0.134763	0.13483	0.13746	0.132411	0.134796	0.00103169
2	RPE1-iCas9_CSB-KO	Phenylarsine oxide	10	1	0.000711091	0.00201389	45402	44648	45862	45466	0.000456846	-0.00553379	0.00411161	0.000965335	0.000711091	0.00201389
2	RPE1-iCas9_CSB-KO	Untreated	-	-	1.00358	0.00706372	172831	171838	171479	168682	1.0129	1.00501	1.00216	0.979935	1.00358	0.00706372
2	RPE1-iCas9_CSB-KO	Irofulven	5.62341	0.75	1.03114	0.0105181	170255	174920	176116	175334	0.992432	1.0295	1.039	1.03279	1.03114	0.0105181
2	RPE1-iCas9_CSB-KO	Irofulven	10	1	1.0489	0.00564997	180007	177514	177210	176898	1.06991	1.05011	1.04769	1.04521	1.0489	0.00564997
2	RPE1-iCas9_CSB-KO	Irofulven	17.7828	1.25	1.08147	0.016775	178011	180688	188002	182234	1.05405	1.07532	1.13343	1.08761	1.08147	0.016775
2	RPE1-iCas9_CSB-KO	Irofulven	31.6228	1.5	1.07916	0.0109255	179372	182970	179207	184782	1.06487	1.09345	1.06356	1.10785	1.07916	0.0109255
2	RPE1-iCas9_CSB-KO	Irofulven	56.2341	1.75	1.07916	0.00570929	182132	182372	180210	179446	1.0868	1.0887	1.07153	1.06546	1.07916	0.00570929
2	RPE1-iCas9_CSB-KO	Irofulven	100	2	1.04006	0.0111695	173181	175536	176962	179906	1.01568	1.03439	1.04572	1.06911	1.04006	0.0111695
2	RPE1-iCas9_CSB-KO	Irofulven	177.828	2.25	0.687041	0.0363657	127254	123915	144155	136381	0.650783	0.624254	0.785064	0.723298	0.687041	0.0363657
2	RPE1-iCas9_CSB-KO	Irofulven	316.228	2.5	0.133089	0.0151305	67611	61373	62818	58494	0.176911	0.127349	0.13883	0.104475	0.133089	0.0151305
2	RPE1-iCas9_CSB-KO	Irofulven	562.341	2.75	0.0447908	0.000588817	51005	50959	51097	50747	0.0449735	0.044608	0.0457045	0.0429237	0.0447908	0.000588817
2	RPE1-iCas9_CSB-KO	Irofulven	1000	3	0.104947	0.00354015	59634	58052	57702	59055	0.113532	0.100963	0.0981822	0.108932	0.104947	0.00354015
2	RPE1-iCas9_CSB-KO	Irofulven	1778.28	3.25	0.173037	0.00310423	66691	67878	67556	66176	0.169601	0.179032	0.176474	0.165509	0.173037	0.00310423
2	RPE1-iCas9_CSB-KO	Irofulven	3162.28	3.5	0.188022	0.0080257	68430	70288	69589	65697	0.183418	0.19818	0.192626	0.161704	0.188022	0.0080257
2	RPE1-iCas9_CSB-KO	Irofulven	5623.41	3.75	0.170185	0.00525881	65292	65909	67620	68043	0.158486	0.163388	0.176982	0.180343	0.170185	0.00525881
2	RPE1-iCas9_CSB-KO	Irofulven	10000	4	0.157358	0.00582073	67454	64474	64290	65826	0.175663	0.151987	0.150525	0.162729	0.157358	0.00582073
2	RPE1-iCas9_ELOF1-KO	Phenylarsine oxide	10	1	0.000119514	0.00308484	47628	47352	46110	46442	0.00635983	0.0040037	-0.00659886	-0.00376468	0.000119514	0.00308484
2	RPE1-iCas9_ELOF1-KO	Untreated	-	-	0.995228	0.00747784	163686	163245	166566	162601	0.99711	0.993346	1.0217	0.987848	0.995228	0.00747784
2	RPE1-iCas9_ELOF1-KO	Irofulven	5.62341	0.75	1.01843	0.0107555	165462	166906	161616	166998	1.01227	1.0246	0.979439	1.02538	1.01843	0.0107555
2	RPE1-iCas9_ELOF1-KO	Irofulven	10	1	1.00929	0.00645816	167219	164202	164082	166023	1.02727	1.00152	1.00049	1.01706	1.00929	0.00645816
2	RPE1-iCas9_ELOF1-KO	Irofulven	17.7828	1.25	1.02806	0.00840679	165536	167937	170136	166686	1.0129	1.0334	1.05217	1.02272	1.02806	0.00840679
2	RPE1-iCas9_ELOF1-KO	Irofulven	31.6228	1.5	1.02315	0.0244263	165563	157743	171184	167909	1.01313	0.946377	1.06112	1.03316	1.02315	0.0244263
2	RPE1-iCas9_ELOF1-KO	Irofulven	56.2341	1.75	1.01518	0.0128143	166603	166456	160209	165149	1.02201	1.02076	0.967428	1.0096	1.01518	0.0128143
2	RPE1-iCas9_ELOF1-KO	Irofulven	100	2	0.985253	0.0119456	161892	157789	162702	164376	0.981796	0.94677	0.98871	1.003	0.985253	0.0119456
2	RPE1-iCas9_ELOF1-KO	Irofulven	177.828	2.25	0.934716	0.00509677	157430	154578	156188	156566	0.943705	0.919358	0.933102	0.936329	0.934716	0.00509677
2	RPE1-iCas9_ELOF1-KO	Irofulven	316.228	2.5	0.723569	0.0497038	140079	127604	135682	113583	0.795585	0.68909	0.758049	0.569397	0.723569	0.0497038
2	RPE1-iCas9_ELOF1-KO	Irofulven	562.341	2.75	0.0933444	0.0323291	71962	57776	57859	55347	0.214092	0.0929901	0.0936986	0.0722545	0.0933444	0.0323291
2	RPE1-iCas9_ELOF1-KO	Irofulven	1000	3	0.00899767	0.00454173	47224	46699	48870	48650	0.00291101	-0.00157075	0.0169624	0.0150843	0.00899767	0.00454173
2	RPE1-iCas9_ELOF1-KO	Irofulven	1778.28	3.25	0.032751	0.00343562	51796	51005	50434	49919	0.0419407	0.0351882	0.0303138	0.0259174	0.032751	0.00343562
2	RPE1-iCas9_ELOF1-KO	Irofulven	3162.28	3.5	0.0760661	0.00274291	55642	56957	55559	55945	0.0747728	0.0859986	0.0740643	0.0773594	0.0760661	0.00274291
2	RPE1-iCas9_ELOF1-KO	Irofulven	5623.41	3.75	0.109129	0.00310468	59901	58411	59432	60002	0.111131	0.0984109	0.107127	0.111993	0.109129	0.00310468
2	RPE1-iCas9_ELOF1-KO	Irofulven	10000	4	0.116709	0.00381012	60628	60932	60481	58935	0.117337	0.119932	0.116082	0.102884	0.116709	0.00381012
2	RPE1-iCas9_CSB/CSA-dKO	Phenylarsine oxide	10	1	-0.000187828	0.000777195	45448	45328	45660	45209	0.000296889	-0.000672544	0.00200955	-0.0016339	-0.000187828	0.000777195
2	RPE1-iCas9_CSB/CSA-dKO	Untreated	-	-	0.995969	0.00968558	166962	169510	167882	172426	0.98196	1.00254	0.989393	1.0261	0.995969	0.00968558
2	RPE1-iCas9_CSB/CSA-dKO	Irofulven	5.62341	0.75	1.01202	0.0183358	169602	163631	171764	174257	1.00329	0.955051	1.02075	1.04089	1.01202	0.0183358
2	RPE1-iCas9_CSB/CSA-dKO	Irofulven	10	1	1.06643	0.0129297	180357	175545	179290	173503	1.09017	1.0513	1.08155	1.0348	1.06643	0.0129297
2	RPE1-iCas9_CSB/CSA-dKO	Irofulven	17.7828	1.25	1.08244	0.0161566	176695	175794	183936	182105	1.06059	1.05331	1.11909	1.10429	1.08244	0.0161566
2	RPE1-iCas9_CSB/CSA-dKO	Irofulven	31.6228	1.5	1.08805	0.0110157	180467	175343	179722	181562	1.09106	1.04967	1.08504	1.09991	1.08805	0.0110157
2	RPE1-iCas9_CSB/CSA-dKO	Irofulven	56.2341	1.75	1.04636	0.0089032	176042	173825	177459	172537	1.05531	1.0374	1.06676	1.027	1.04636	0.0089032
2	RPE1-iCas9_CSB/CSA-dKO	Irofulven	100	2	0.998085	0.0029085	169979	169013	168231	168903	1.00633	0.99853	0.992212	0.997641	0.998085	0.0029085
2	RPE1-iCas9_CSB/CSA-dKO	Irofulven	177.828	2.25	0.768649	0.0209874	141680	130732	141588	139527	0.777717	0.689273	0.776974	0.760324	0.768649	0.0209874
2	RPE1-iCas9_CSB/CSA-dKO	Irofulven	316.228	2.5	0.204055	0.0114155	73085	68255	73131	68172	0.223565	0.184546	0.223937	0.183875	0.204055	0.0114155
2	RPE1-iCas9_CSB/CSA-dKO	Irofulven	562.341	2.75	0.0425116	0.0026244	51612	50876	50094	50471	0.0500934	0.0441476	0.0378301	0.0408757	0.0425116	0.0026244
2	RPE1-iCas9_CSB/CSA-dKO	Irofulven	1000	3	0.0774072	0.00375375	56654	54547	55025	54961	0.0908257	0.0738041	0.0776657	0.0771487	0.0774072	0.00375375
2	RPE1-iCas9_CSB/CSA-dKO	Irofulven	1778.28	3.25	0.150801	0.00205545	64428	64575	63728	63544	0.153629	0.154816	0.147974	0.146487	0.150801	0.00205545
2	RPE1-iCas9_CSB/CSA-dKO	Irofulven	3162.28	3.5	0.179266	0.00213851	68246	67050	67850	67353	0.184473	0.174811	0.181274	0.177259	0.179266	0.00213851
2	RPE1-iCas9_CSB/CSA-dKO	Irofulven	5623.41	3.75	0.173098	0.0052058	65062	66323	68016	67353	0.158751	0.168938	0.182615	0.177259	0.173098	0.0052058
2	RPE1-iCas9_CSB/CSA-dKO	Irofulven	10000	4	0.152587	0.00577934	66544	64888	63710	63379	0.170723	0.157345	0.147828	0.145154	0.152587	0.00577934
2	RPE1-iCas9_CSB/ELOF1-dKO	Phenylarsine oxide	10	1	0.00106571	0.00188902	45586	44822	45678	45347	0.00224219	-0.00527935	0.00314792	-0.000110756	0.00106571	0.00188902
2	RPE1-iCas9_CSB/ELOF1-dKO	Untreated	-	-	1.00897	0.0152101	142655	148994	149390	146694	0.957881	1.02029	1.02419	0.997645	1.00897	0.0152101
2	RPE1-iCas9_CSB/ELOF1-dKO	Irofulven	5.62341	0.75	0.991757	0.0071279	145277	144201	147310	146915	0.983694	0.973101	1.00371	0.99982	0.991757	0.0071279
2	RPE1-iCas9_CSB/ELOF1-dKO	Irofulven	10	1	0.986367	0.0189072	145102	145995	148000	139076	0.981971	0.990763	1.0105	0.922646	0.986367	0.0189072
2	RPE1-iCas9_CSB/ELOF1-dKO	Irofulven	17.7828	1.25	0.996827	0.00491723	146979	144909	146243	147071	1.00045	0.980071	0.993205	1.00136	0.996827	0.00491723
2	RPE1-iCas9_CSB/ELOF1-dKO	Irofulven	31.6228	1.5	0.994155	0.0348453	145093	135314	152058	147586	0.981883	0.885609	1.05045	1.00643	0.994155	0.0348453
2	RPE1-iCas9_CSB/ELOF1-dKO	Irofulven	56.2341	1.75	0.949414	0.0187146	143474	144615	140116	136160	0.965944	0.977177	0.932885	0.893938	0.949414	0.0187146
2	RPE1-iCas9_CSB/ELOF1-dKO	Irofulven	100	2	0.797654	0.0101222	128984	123970	126610	126150	0.823291	0.773928	0.799919	0.79539	0.797654	0.0101222
2	RPE1-iCas9_CSB/ELOF1-dKO	Irofulven	177.828	2.25	0.362178	0.0303165	78908	72551	85385	85422	0.330295	0.267711	0.394061	0.394425	0.362178	0.0303165
2	RPE1-iCas9_CSB/ELOF1-dKO	Irofulven	316.228	2.5	0.0756067	0.00583376	54510	52541	53535	51787	0.0900984	0.0707138	0.0804996	0.0632907	0.0756067	0.00583376
2	RPE1-iCas9_CSB/ELOF1-dKO	Irofulven	562.341	2.75	0.00690869	0.000943806	46166	45899	46313	45954	0.00795225	0.00532365	0.00939946	0.00586512	0.00690869	0.000943806
2	RPE1-iCas9_CSB/ELOF1-dKO	Irofulven	1000	3	0.0196776	0.00148173	47435	47279	47555	46865	0.0204455	0.0189097	0.0216269	0.0148339	0.0196776	0.00148173
2	RPE1-iCas9_CSB/ELOF1-dKO	Irofulven	1778.28	3.25	0.0507482	0.00190815	50536	51023	50076	50490	0.0509746	0.0557691	0.046446	0.0505218	0.0507482	0.00190815
2	RPE1-iCas9_CSB/ELOF1-dKO	Irofulven	3162.28	3.5	0.0785503	0.00239009	53130	54206	53434	53240	0.0765124	0.0871056	0.0795053	0.0775954	0.0785503	0.00239009
2	RPE1-iCas9_CSB/ELOF1-dKO	Irofulven	5623.41	3.75	0.0784568	0.00305119	52909	52790	54050	53746	0.0743367	0.0731651	0.0855698	0.0825769	0.0784568	0.00305119
2	RPE1-iCas9_CSB/ELOF1-dKO	Irofulven	10000	4	0.0765617	0.00237523	53526	53342	52440	52928	0.080411	0.0785996	0.0697194	0.0745238	0.0765617	0.00237523
2	RPE1-iCas9_PTGR1-KO	Phenylarsine oxide	10	1	-0.000370095	0.00302627	46313	45365	44565	45338	0.00776353	-0.000255894	-0.00702334	-0.000484295	-0.000370095	0.00302627
2	RPE1-iCas9_PTGR1-KO	Untreated	-	-	1.00125	0.0148023	165214	159436	162297	167486	1.01358	0.964706	0.988908	1.0328	1.00125	0.0148023
2	RPE1-iCas9_PTGR1-KO	Irofulven	5.62341	0.75	0.994237	0.0101844	161892	159160	164450	163962	0.985482	0.962371	1.00712	1.00299	0.994237	0.0101844
2	RPE1-iCas9_PTGR1-KO	Irofulven	10	1	1.00323	0.017992	170862	160871	164643	163337	1.06136	0.976845	1.00875	0.997705	1.00323	0.017992
2	RPE1-iCas9_PTGR1-KO	Irofulven	17.7828	1.25	1.02697	0.0105644	163447	167845	169151	165747	0.998636	1.03584	1.04689	1.01809	1.02697	0.0105644
2	RPE1-iCas9_PTGR1-KO	Irofulven	31.6228	1.5	1.01914	0.0128829	165250	166511	160108	166492	1.01389	1.02456	0.97039	1.02439	1.01914	0.0128829
2	RPE1-iCas9_PTGR1-KO	Irofulven	56.2341	1.75	1.04736	0.0134366	169446	168967	170347	163337	1.04938	1.04533	1.05701	0.997705	1.04736	0.0134366
2	RPE1-iCas9_PTGR1-KO	Irofulven	100	2	0.99642	0.0073903	162941	161865	165986	163429	0.994356	0.985253	1.02011	0.998484	0.99642	0.0073903
2	RPE1-iCas9_PTGR1-KO	Irofulven	177.828	2.25	1.00545	0.00655929	163594	162362	164910	165922	0.999879	0.989458	1.01101	1.01957	1.00545	0.00655929
2	RPE1-iCas9_PTGR1-KO	Irofulven	316.228	2.5	0.989648	0.00748426	162472	162610	158930	162297	0.990388	0.991555	0.960425	0.988908	0.989648	0.00748426
2	RPE1-iCas9_PTGR1-KO	Irofulven	562.341	2.75	0.982995	0.012159	159298	163990	158672	163898	0.963538	1.00323	0.958243	1.00245	0.982995	0.012159
2	RPE1-iCas9_PTGR1-KO	Irofulven	1000	3	0.976887	0.00942812	163015	158350	159464	162288	0.994982	0.955519	0.964943	0.988832	0.976887	0.00942812
2	RPE1-iCas9_PTGR1-KO	Irofulven	1778.28	3.25	0.963538	0.010135	162739	159730	158866	156989	0.992647	0.967193	0.959884	0.944006	0.963538	0.010135
2	RPE1-iCas9_PTGR1-KO	Irofulven	3162.28	3.5	0.981827	0.0156598	154293	162086	161635	161285	0.921199	0.987123	0.983308	0.980347	0.981827	0.0156598
2	RPE1-iCas9_PTGR1-KO	Irofulven	5623.41	3.75	0.971008	0.0151516	162214	160604	153990	159758	0.988206	0.974586	0.918636	0.96743	0.971008	0.0151516
2	RPE1-iCas9_PTGR1-KO	Irofulven	10000	4	0.911903	0.0143299	158019	154873	150595	151515	0.952719	0.926106	0.889917	0.897699	0.911903	0.0143299
